# Supplementary material for: DAP5 drives translation of specific mRNA targets with upstream ORFs in human embryonic stem cells
Source: RNA. 2022 Oct;28(10):1325–36. doi: 10.1261/rna.079194.122 (PMC9479741; doi:10.1261/rna.079194.122)
Supplement: Supplemental Material [file supp_079194.122_Supplemental_Table_S1.xlsx]

## Sheet: DAP5 DEGs
ID	total_sample_mean	ratio shDAP5/shNT	log2FoldChange	pvalue	padj
ZIC1	35.6564	0.0131662	-6.24701	6.52e-10	6.75e-08
GREB1L	6.82184	0.0408535	-4.6134	3.92e-05	0.000943869
COL9A1	7.12571	0.0451958	-4.46767	1.73e-05	0.000469353
FBN2	11.9062	0.087504	-3.51451	2.84e-36	1.78e-32
PRTG	4.15996	0.105383	-3.24629	7.69e-11	1.07e-08
CCDC177	10.8555	0.107584	-3.21647	4.33e-07	2.07e-05
LHX5	3.53679	0.111067	-3.17049	0.00118127	0.0134569
DIO3	5.64038	0.111788	-3.16116	0.00659173	0.0470935
SHISA2	2.95783	0.112745	-3.14887	1.27e-10	1.58e-08
CHRNB4	5.00239	0.112856	-3.14745	1.36e-05	0.00038541
HES3	2.9327	0.118534	-3.07662	5.33e-16	2.47e-13
KLHL14	4.86006	0.120083	-3.0579	2.61e-05	0.000664767
CUZD1	7.852	0.122147	-3.03331	3.64e-06	0.000127525
BST2	2.79852	0.125496	-2.99429	1.38e-15	5.07e-13
NELL2	8.09175	0.127432	-2.9722	4.07e-28	8.5e-25
MAP2	2.66405	0.127698	-2.9692	4.24e-05	0.00100143
TRPC4	2.5887	0.129564	-2.94826	1.03e-11	1.73e-09
FEZ1	2.5887	0.131279	-2.92929	1.35e-20	9.97e-18
SIX3	7.64956	0.132825	-2.9124	3.69e-10	4.02e-08
DLK1	7.41134	0.135925	-2.87911	0.00726902	0.0499934
MEIOC	2.47051	0.136164	-2.87658	1.72e-05	0.000466414
XKR5	2.42497	0.14188	-2.81726	2.51e-05	0.000641398
UNC5A	2.39984	0.1419	-2.81705	1.77e-06	6.77e-05
NPTX1	2.36782	0.150384	-2.73328	8.62e-05	0.00179522
RTN4RL2	4.35821	0.151979	-2.71806	3.07e-07	1.55e-05
NPTX2	4.1694	0.152934	-2.70902	1.05e-10	1.38e-08
DPYSL5	4.10317	0.1534	-2.70463	1.22e-07	7e-06
KCNG1	2.27477	0.154419	-2.69508	1.3e-15	5.07e-13
PCDH10	3.81753	0.154771	-2.6918	1.02e-05	0.00030207
FEZF1	2.22231	0.159058	-2.65238	1.3e-08	9.59e-07
SFRP1	3.88635	0.159883	-2.64492	1.16e-43	1.45e-39
RHOBTB3	6.43006	0.160272	-2.64141	3.9e-11	5.82e-09
SLITRK5	2.17897	0.16415	-2.60691	9.59e-08	5.64e-06
SLC1A1	2.16296	0.164626	-2.60274	3.3e-07	1.64e-05
FZD2	6.1963	0.168402	-2.57002	3.89e-31	9.75e-28
NTS	5.91006	0.172943	-2.53163	3.16e-15	1.04e-12
ATP1A2	5.69914	0.175718	-2.50867	9.76e-12	1.65e-09
ADAMTS9	3.62957	0.178381	-2.48697	5.52e-05	0.00124679
DDX60	235.215	0.179101	-2.48116	0.000226605	0.00384711
HOMER3	3.47404	0.179915	-2.47461	9.5e-07	4.03e-05
FHOD3	3.37311	0.184655	-2.4371	1.07e-07	6.23e-06
EIF4G2	5.57106	0.186742	-2.42088	3.49e-32	1.09e-28
TRPV4	1.76205	0.188399	-2.40813	0.000678718	0.00879341
RASL10B	3.37586	0.188422	-2.40796	5.15e-07	2.42e-05
C3	5.28595	0.188533	-2.40711	0.000312074	0.00491419
PLCG2	5.5076	0.189304	-2.40122	1.1e-05	0.000323116
ECEL1	1.87885	0.189356	-2.40083	6.82e-10	7e-08
UBE2D1	1.75791	0.191109	-2.38753	6.59e-05	0.0014487
FIGNL2	7.75656	0.191607	-2.38378	4.46e-12	8.1e-10
SRRM3	3.04786	0.192373	-2.37802	5.18e-05	0.00117698
MMP17	3.10583	0.193577	-2.36902	1.07e-13	2.58e-11
ZNF521	3.04139	0.193899	-2.36662	2.5e-11	3.92e-09
EFEMP1	9.84209	0.196105	-2.3503	1.82e-08	1.31e-06
HTRA1	3.01223	0.197923	-2.33699	2.89e-09	2.47e-07
LAMA1	32.0104	0.198541	-2.33249	4.64e-23	4.84e-20
GATM	9.72761	0.198966	-2.32941	6.25e-07	2.82e-05
KRT7	9.41346	0.201683	-2.30984	1.2e-05	0.000345367
C1QL1	9.46952	0.204258	-2.29153	0.000469449	0.00667726
BACE2	16.4048	0.205129	-2.2854	2.28e-07	1.19e-05
SLFN13	13.4698	0.206961	-2.27257	1.83e-10	2.08e-08
CPE	11.4242	0.208803	-2.25979	1.29e-09	1.23e-07
PTMS	34.6384	0.210929	-2.24517	6.18e-10	6.56e-08
TMEM200C	11.2709	0.211524	-2.24111	8.67e-07	3.72e-05
PALM	2.73949	0.211671	-2.24011	0.000102398	0.0020696
P3H3	6.7185	0.214562	-2.22053	3.48e-13	7.8e-11
NEFL	2.70527	0.215361	-2.21517	1.08e-10	1.39e-08
RHBDL3	4.44731	0.215504	-2.21421	0.000421438	0.00610524
INHBE	56.1958	0.215608	-2.21352	0.000333423	0.00515817
EPHX2	4.38532	0.215896	-2.21159	0.000281733	0.00457452
HSPG2	6.47922	0.217603	-2.20023	7.08e-18	4.44e-15
SLIT2	10.8226	0.217688	-2.19967	7.22e-05	0.00156365
EMILIN3	2.46243	0.218119	-2.19681	7.05e-07	3.13e-05
FGFBP3	6.34044	0.219761	-2.18599	1.06e-20	8.28e-18
PPFIA3	3.98606	0.220415	-2.18171	2.64e-07	1.36e-05
SLC22A3	15.0136	0.220637	-2.18025	0.00104655	0.0122678
PPM1J	2.65414	0.220744	-2.17955	5.26e-06	0.000174035
PCED1A	65.7463	0.222662	-2.16707	6.96e-08	4.34e-06
DERA	2.5701	0.224384	-2.15596	2.39e-09	2.08e-07
ACTN3	2.62945	0.225135	-2.15114	5.66e-09	4.43e-07
CYP2U1	2.49251	0.225563	-2.1484	0.000326222	0.00507813
CCM2L	81.2821	0.226058	-2.14524	0.000163232	0.0030303
CES2	10.2002	0.228559	-2.12936	4.87e-08	3.2e-06
ROBO3	6.20813	0.228745	-2.12819	0.000444169	0.00638289
PREX1	29.9827	0.229741	-2.12192	1.2e-16	6.76e-14
FZD9	4.17717	0.230228	-2.11886	0.000149441	0.00280757
CACNG7	61.0387	0.230475	-2.11732	5.97e-07	2.71e-05
SEMA5B	2.2987	0.233097	-2.101	5.99e-10	6.42e-08
SEMA6D	2.3311	0.23546	-2.08644	9.62e-06	0.000288273
GRPR	1.40754	0.237822	-2.07205	2.29e-16	1.1e-13
PLCL2	4.1087	0.238399	-2.06855	1.51e-06	5.95e-05
ORAI3	27.8629	0.240798	-2.0541	7.18e-05	0.00155686
MEIS3	3.77014	0.242321	-2.04501	2.06e-06	7.74e-05
ASTN1	3.86198	0.242572	-2.04352	0.000264456	0.00435467
CRYBG2	11.346	0.243423	-2.03846	1.02e-06	4.3e-05
ADA	11.6768	0.244012	-2.03498	4.51e-06	0.000153924
CDH11	1.29572	0.246081	-2.02279	8.98e-06	0.000273076
EFNA2	9.43957	0.246291	-2.02157	0.000229857	0.00389197
VAT1L	1.27972	0.247207	-2.01621	2.33e-12	4.42e-10
PKDCC	1.23637	0.247709	-2.01328	5.08e-15	1.59e-12
IRX1	13.3181	0.248353	-2.00953	1.18e-05	0.000342463
SLITRK4	18.7572	0.24879	-2.007	0.000615731	0.00816479
ZNF469	3.85521	0.24904	-2.00555	0.000149182	0.0028069
SLC13A3	1.10632	0.250935	-1.99462	0.00058247	0.00791641
WFIKKN1	2.17584	0.251363	-1.99215	4.41e-07	2.1e-05
NRCAM	3.4841	0.252668	-1.98468	0.0031202	0.027077
SEMA5A	3.47117	0.253517	-1.97985	3.85e-07	1.88e-05
OTX2	1.99759	0.253899	-1.97767	5.35e-13	1.1e-10
RIN1	2.12403	0.254338	-1.97518	0.000587569	0.00795122
HMX2	29.711	0.255704	-1.96745	0.00128356	0.0142635
SIMC1	6.97969	0.256767	-1.96147	4.93e-06	0.000163971
SIRPA	24.9401	0.258064	-1.9542	0.00227368	0.0218326
OLFML2B	31.3262	0.258507	-1.95172	0.00014265	0.0027084
PCK2	19.29	0.25867	-1.95082	4.12e-22	3.69e-19
LRRC4B	41.7542	0.260128	-1.94271	8.66e-05	0.00179932
GDPD2	67.5504	0.260161	-1.94252	4.02e-07	1.95e-05
POU3F1	3.59706	0.260567	-1.94027	2.41e-09	2.08e-07
GPR153	81.9291	0.261841	-1.93324	9.65e-07	4.08e-05
CACNA1C	5.10088	0.26547	-1.91338	0.000349348	0.00535824
RARRES2	3.53711	0.265777	-1.91171	2.59e-15	8.78e-13
PRR36	3.60558	0.267176	-1.90414	2.3e-13	5.34e-11
FREM1	3.61168	0.268498	-1.89702	0.00236693	0.0223414
CLDN3	3.5011	0.269865	-1.88969	2.47e-06	9.07e-05
GNG4	25.6117	0.270248	-1.88764	0.000103059	0.0020796
DNAJC6	3.21465	0.270513	-1.88623	0.000900085	0.0109504
SLC2A12	380.809	0.270932	-1.884	0.000307018	0.00486992
ASNS	35.0002	0.271192	-1.88262	6.92e-24	8.67e-21
ABCC4	2.12392	0.272062	-1.87799	1.57e-07	8.49e-06
RHPN2	2.02812	0.272534	-1.87549	6.98e-11	9.83e-09
ATP8A1	2.10165	0.273012	-1.87297	5.89e-07	2.69e-05
HMCN2	2.0099	0.273406	-1.87088	1.22e-10	1.53e-08
NR6A1	21.3457	0.27375	-1.86907	1.68e-24	2.33e-21
CA11	18.068	0.274633	-1.86442	2.16e-08	1.51e-06
SHISA3	1.94364	0.274845	-1.86331	0.000415886	0.00604579
DLL1	1.93452	0.278402	-1.84476	1.28e-05	0.000364139
HEBP1	8.30431	0.27924	-1.84042	2.45e-07	1.27e-05
HES6	5.00079	0.279422	-1.83948	6.42e-10	6.71e-08
ADAM23	3.26783	0.279549	-1.83883	9.28e-07	3.96e-05
TXNRD3	6.40171	0.27966	-1.83826	0.00155114	0.0164444
TNFRSF25	6.38472	0.280382	-1.83454	0.00251002	0.0231102
EHD2	6.32563	0.281079	-1.83095	1.65e-05	0.000450941
POGLUT3	178.474	0.281331	-1.82966	9.44e-06	0.000283735
NPR1	4.83208	0.281604	-1.82826	2.71e-06	9.86e-05
NETO1	1.76583	0.283681	-1.81766	0.000452433	0.00647936
EHBP1L1	3.35782	0.283833	-1.81689	0.002143	0.0208303
SGPP1	6.22842	0.283889	-1.8166	4.86e-05	0.00111991
JPH4	3.17908	0.284274	-1.81465	1.28e-07	7.21e-06
TLCD3B	6.36113	0.284644	-1.81277	6.85e-05	0.00149452
CNTNAP1	4.66416	0.285682	-1.80752	6.33e-06	0.000206538
CYP2R1	1.0384	0.28581	-1.80687	0.00121714	0.0137654
DNASE2	3.10353	0.286071	-1.80555	4.88e-11	7.11e-09
DOK1	55.3418	0.287941	-1.79616	0.00070209	0.00897744
NEFM	6.31576	0.289342	-1.78915	1.69e-10	1.96e-08
CHST6	4.81573	0.290064	-1.78556	2.95e-07	1.5e-05
KCNK12	0.99726	0.290521	-1.78329	4.69e-06	0.000157619
ARC	1.01106	0.29182	-1.77685	0.00322272	0.0277743
NID2	7.44765	0.29232	-1.77438	2.18e-06	8.1e-05
SEL1L3	0.995056	0.29241	-1.77393	6.02e-18	3.97e-15
KIAA0408	7.54841	0.293546	-1.76834	0.000198871	0.00349026
CADM4	0.995056	0.293878	-1.76671	0.000467197	0.00665278
PIEZO2	4.63055	0.295009	-1.76117	9.12e-10	9e-08
ARL4D	42.4282	0.295997	-1.75635	0.00114567	0.0131952
OLIG2	3.15864	0.296598	-1.75342	0.00513102	0.0392532
LOXL2	7.9446	0.297844	-1.74737	1.62e-10	1.94e-08
SEMA4F	6.40051	0.298247	-1.74542	0.00362449	0.0302837
NOVA2	4.37929	0.299016	-1.74171	0.0019079	0.0190501
SYT7	15.0416	0.299633	-1.73873	0.000218191	0.00375056
NIBAN1	10.4285	0.300398	-1.73505	3.1e-05	0.000771745
CRABP2	19.7046	0.30078	-1.73322	7.33e-06	0.000232788
MOCOS	4.53044	0.30204	-1.72719	3.43e-06	0.000121671
FAXC	4.44082	0.302422	-1.72537	0.00166715	0.0172508
RHOBTB1	5.9837	0.302474	-1.72512	1.82e-05	0.000486931
LTBP4	1.90729	0.303246	-1.72144	3.5e-09	2.85e-07
FAR2	22.3692	0.303658	-1.71948	1.13e-07	6.49e-06
RASSF10	7.38417	0.304218	-1.71682	0.00228036	0.0218411
SARDH	7.5405	0.304326	-1.71631	7.3e-05	0.00157364
LRRC75B	2.92335	0.304978	-1.71322	0.000310883	0.00491257
PPM1E	4.44657	0.305193	-1.71221	7.52e-05	0.00161072
IGDCC4	540.902	0.305265	-1.71187	8.95e-09	6.76e-07
AP3B2	4.24398	0.306979	-1.70379	0.00207108	0.0203474
SLC16A12	5.66591	0.307038	-1.70351	0.00125256	0.0140267
HSPA12B	4.4298	0.307204	-1.70273	0.000223019	0.00380224
TRANK1	3.08669	0.309151	-1.69362	2.03e-06	7.64e-05
EFS	10.16	0.309578	-1.69163	2.83e-12	5.29e-10
PADI2	23.5111	0.310177	-1.68883	0.00378886	0.0313802
SESN2	2.92725	0.31114	-1.68436	2.42e-08	1.68e-06
GPRIN2	10.7304	0.311177	-1.68419	4.09e-06	0.000140709
TMEM158	14.5317	0.311248	-1.68386	1.08e-09	1.04e-07
PPP1R1A	35.2093	0.311812	-1.68125	0.00337984	0.0287691
CRB2	2.89666	0.311936	-1.68068	8.69e-05	0.00180244
GAS1	2.93902	0.315366	-1.6649	0.00151265	0.0161594
KLF15	4.44165	0.315668	-1.66352	3.04e-05	0.000759618
SLC66A3	4.23232	0.315683	-1.66345	0.00342533	0.0290608
TMEM8B	1.76044	0.316664	-1.65898	2.61e-05	0.000664767
CAMK2D	2.98176	0.316992	-1.65748	0.00253928	0.0232941
WDR86	2.89712	0.318121	-1.65235	0.000548313	0.00755876
ISOC1	10.9501	0.319372	-1.64669	1.31e-08	9.59e-07
PLCH1	8.67288	0.319487	-1.64617	3.21e-09	2.66e-07
ADRA2B	2.94188	0.319691	-1.64525	0.0037689	0.0312355
PLAUR	5.75305	0.320788	-1.64031	0.000591441	0.00799497
RMI2	54.3786	0.321201	-1.63845	0.00440207	0.03518
ARHGEF4	3.02796	0.322102	-1.63441	1.23e-06	4.98e-05
DUSP4	17.9538	0.322317	-1.63345	0.000120311	0.00236675
ATP8A2	2.95223	0.322476	-1.63274	0.00315944	0.0273796
ST6GALNAC3	2.87341	0.322488	-1.63268	0.000765769	0.00964407
SCN4A	75.4658	0.322645	-1.63198	0.00108598	0.0126238
WNT5A	1.74852	0.323419	-1.62852	0.00106734	0.0124417
PLAU	41.467	0.323732	-1.62713	0.000318068	0.00497911
CLMN	5.81244	0.323938	-1.62621	0.000121113	0.00237759
TNC	2.65886	0.32455	-1.62349	0.000739903	0.00938434
ABCA3	1.7165	0.324903	-1.62192	1.62e-05	0.000446464
FHL1	2.66196	0.326702	-1.61395	1.89e-07	1.01e-05
COL2A1	26.771	0.326713	-1.6139	0.000742126	0.00940302
CRYM	30.9924	0.326956	-1.61283	2.72e-05	0.00068912
LPAR3	8.2474	0.327325	-1.6112	5.12e-05	0.00116696
TRPM3	2.87835	0.327809	-1.60907	0.00191462	0.0190868
H6PD	402.735	0.327839	-1.60894	7.48e-09	5.71e-07
C1QTNF4	22.1941	0.328366	-1.60662	0.000154441	0.00288005
KCTD12	7.01234	0.328981	-1.60392	0.00165923	0.0171976
TEX15	4.22491	0.329406	-1.60206	1.86e-08	1.32e-06
OPLAH	9.96566	0.329462	-1.60182	1.29e-07	7.21e-06
CST3	15.309	0.329515	-1.60158	6.88e-06	0.000221163
HOMEZ	5.40762	0.329764	-1.60049	0.000170047	0.00309785
STEAP2	8.25548	0.330182	-1.59867	0.00153843	0.0163373
COL14A1	10.9709	0.330549	-1.59706	1.22e-08	9.14e-07
STOX1	6.83593	0.33071	-1.59636	0.000844425	0.0104046
PDGFRB	24.526	0.331457	-1.59311	0.000107222	0.00215321
ALDH2	2.90129	0.332502	-1.58857	6.24e-07	2.82e-05
IMPDH1	5.38099	0.333558	-1.58399	1.37e-08	1e-06
CDK6	6.37609	0.333566	-1.58395	0.000502233	0.00703969
CTNNA2	33.3997	0.334259	-1.58096	0.000990131	0.0117591
MSI1	4.00368	0.334907	-1.57817	1.3e-06	5.22e-05
NID1	30.6281	0.335337	-1.57632	1.34e-12	2.63e-10
ATR	9.54468	0.335595	-1.57521	3.64e-12	6.7e-10
AOX1	7.91382	0.336392	-1.57179	0.00239115	0.0224614
SLC22A17	6.71167	0.33688	-1.5697	7.73e-08	4.68e-06
DUSP6	30.0966	0.337316	-1.56783	1.33e-10	1.63e-08
TGFBI	25.78	0.337426	-1.56736	0.000980487	0.0117237
SLC29A4	5.31259	0.337605	-1.56659	0.000103874	0.00209267
IMPA1	13.4587	0.337857	-1.56551	0.000935402	0.011299
TUB	2.65436	0.338589	-1.56239	4.95e-06	0.000164058
EPS8L1	2.69588	0.339514	-1.55846	2.29e-05	0.000598167
SELENOP	6.42262	0.34	-1.55639	1.04e-06	4.36e-05
FAM83B	3.88044	0.340532	-1.55414	0.00161066	0.0169322
GPC3	59.2304	0.341098	-1.55174	2.11e-21	1.77e-18
CDO1	42.2978	0.342019	-1.54785	0.0014207	0.015427
EPHA8	12.9172	0.342521	-1.54573	0.0023224	0.0220804
PLEKHH3	11.9396	0.343802	-1.54035	4.39e-05	0.00103067
CAPN2	10.2791	0.344831	-1.53604	3.03e-08	2.07e-06
PTER	7.63562	0.345489	-1.53329	0.000488858	0.00689851
SLC15A3	2.67669	0.345508	-1.53321	0.000858656	0.0105488
C1RL	6.46801	0.345967	-1.5313	0.000272295	0.00447199
PLEKHH2	4.06508	0.346029	-1.53104	0.00492173	0.0382357
CCKBR	6.26545	0.346233	-1.53019	9.89e-05	0.00201927
ADCY6	533.574	0.346316	-1.52984	8.61e-05	0.00179522
USP3	15.4173	0.34754	-1.52475	3.93e-06	0.000137321
NPR2	23.3617	0.347578	-1.52459	0.000197896	0.00347803
PRKCB	3.95893	0.347911	-1.52321	0.00447011	0.0356329
SLC27A1	7.7896	0.348024	-1.52274	0.000440171	0.00633998
ASS1	196.169	0.34857	-1.52048	5.59e-12	9.86e-10
TNFAIP2	24.4022	0.348612	-1.5203	0.000606761	0.00807912
RCN1	10.1471	0.348649	-1.52015	3.04e-09	2.57e-07
CSMD2	29.0651	0.349138	-1.51813	7.78e-08	4.69e-06
TCAF1	3.76908	0.350738	-1.51154	1.16e-09	1.12e-07
GPR63	5.18163	0.351116	-1.50998	0.000579933	0.00789907
STK32C	3.64717	0.351244	-1.50945	0.0020964	0.0205234
PDE3B	37.3299	0.35132	-1.50914	6.99e-07	3.12e-05
LRP11	1.63317	0.351504	-1.50839	1.18e-06	4.83e-05
BCAS4	7.74473	0.351593	-1.50802	6.96e-06	0.000223124
ZNF185	7.38212	0.35234	-1.50496	0.000599919	0.00805048
RIMS3	31.8207	0.353241	-1.50127	0.000350407	0.00536136
GCA	32.7242	0.353428	-1.50051	1.37e-05	0.00038625
ALCAM	11.218	0.353857	-1.49876	1.63e-05	0.000446831
NRXN1	13.5992	0.354071	-1.49789	6.43e-05	0.0014269
SLC27A2	9.55887	0.354084	-1.49784	0.00148812	0.0159929
APC2	8.79149	0.354513	-1.49609	0.00348397	0.0293991
SLFN5	6.30246	0.354771	-1.49504	0.00714488	0.0494655
TMTC1	2.51973	0.356145	-1.48946	6.55e-05	0.00144557
ZIC2	31.709	0.356902	-1.4864	2.69e-19	1.87e-16
ACADSB	2.59634	0.35712	-1.48552	7.64e-06	0.000240019
FAM174B	11.2777	0.357852	-1.48257	0.00100587	0.0119023
NLGN3	2.65529	0.359816	-1.47467	0.00106114	0.0123925
CITED4	3.78156	0.359984	-1.474	9.84e-05	0.00201099
VEGFA	77.8859	0.360273	-1.47284	9.39e-06	0.000282775
COL4A6	2.44217	0.360492	-1.47196	6.14e-08	3.89e-06
SNTB1	3.59073	0.360847	-1.47054	0.000180451	0.00324424
BTBD2	14.9845	0.361031	-1.46981	9.25e-14	2.27e-11
MFGE8	23.3399	0.362146	-1.46536	3.16e-32	1.09e-28
NENF	5.07681	0.365155	-1.45342	0.00106481	0.0124238
HAPLN3	4.85619	0.365268	-1.45297	6.24e-08	3.91e-06
MATN3	1.54366	0.365713	-1.45121	0.000277958	0.00455306
PELI2	39.6022	0.367239	-1.44521	0.00170435	0.0175294
COL11A1	7.20962	0.368523	-1.44017	0.0015339	0.0163031
MACROH2A1	7.35081	0.368638	-1.43972	7.39e-12	1.27e-09
ZNF853	1.45918	0.368894	-1.43872	0.000181418	0.00325228
GALNT12	6.13465	0.369382	-1.43682	9.67e-06	0.000288369
KLHL13	19.1845	0.370752	-1.43147	0.00174765	0.0178774
KIT	8.27418	0.370805	-1.43127	1.43e-09	1.33e-07
MARVELD1	3.47247	0.372718	-1.42384	2.1e-05	0.00055056
RASAL1	3.88553	0.373267	-1.42172	0.00663806	0.0473429
MYO3A	151.247	0.373478	-1.42091	0.00107408	0.012497
CPZ	22.2402	0.373897	-1.41929	0.000557564	0.00764423
ZBTB38	2.4027	0.376902	-1.40774	7.87e-05	0.00167681
CCDC180	4.71546	0.378677	-1.40096	0.00331209	0.0283859
FUT1	5.01075	0.379915	-1.39625	0.00164813	0.0171662
GADD45A	16.2642	0.381315	-1.39094	0.00469152	0.0369977
MTERF2	2.40738	0.381934	-1.3886	0.00457187	0.0362261
SYNE4	3.43461	0.383028	-1.38448	0.00185706	0.0186915
TMEM178A	1.27852	0.383554	-1.3825	0.00452981	0.0359718
KALRN	26.3202	0.383597	-1.38234	0.000187008	0.00332869
H3C11	11.542	0.383617	-1.38226	9.81e-06	0.000291469
PHYH	13.8664	0.384278	-1.37978	0.000195903	0.00345268
FLT4	29.7135	0.385464	-1.37533	3.69e-05	0.000896915
CLDN10	4.66937	0.385765	-1.3742	0.000205396	0.00356978
MYL9	19.128	0.385862	-1.37384	3.98e-06	0.000138186
MYCL	4.73862	0.385879	-1.37378	1.67e-06	6.49e-05
LRP3	4.63512	0.387876	-1.36633	5.6e-13	1.13e-10
BCL7C	6.12185	0.388787	-1.36295	0.00012455	0.00242727
TMTC4	20.2599	0.3888	-1.3629	1.26e-07	7.2e-06
PDLIM4	2.29843	0.389223	-1.36133	0.00172865	0.0177264
FAM184A	14.1322	0.390493	-1.35663	0.00012688	0.00244823
FBXW8	6.02828	0.390882	-1.35519	8.8e-06	0.000270157
LOXL1	51.1387	0.390966	-1.35488	0.000247617	0.00412389
SUFU	4.85089	0.391138	-1.35425	0.000977453	0.0116986
CACNA1G	81.0586	0.391394	-1.35331	0.000686141	0.00886122
PTN	3.49221	0.392287	-1.35002	0.00252184	0.023185
MEGF6	5.81326	0.39317	-1.34678	0.000136903	0.00261774
PTGIS	26.1689	0.393891	-1.34413	7.62e-06	0.000240016
MMP2	11.472	0.394973	-1.34018	1.03e-12	2.05e-10
IER5	39.2175	0.396619	-1.33417	0.000839195	0.0103708
TP53I11	8.30518	0.396656	-1.33404	0.00114521	0.0131952
GSN	16.52	0.396662	-1.33402	1.48e-07	8.11e-06
ITGA5	4.48342	0.396847	-1.33335	0.000211375	0.00365781
SDC3	11.5308	0.397558	-1.33076	4.07e-06	0.000140368
COCH	26.4735	0.398567	-1.32711	9.62e-05	0.00197359
TRAF5	4.43927	0.39871	-1.32659	0.000414675	0.00603518
ASTN2	10.0817	0.399752	-1.32282	0.000177677	0.0032128
BCL6B	6.73705	0.401727	-1.31571	0.00277963	0.024951
GLCCI1	27.5938	0.40223	-1.31391	1.95e-05	0.00051549
ID3	83.4935	0.402375	-1.31339	1.53e-07	8.36e-06
RAI1	4.39715	0.40286	-1.31165	2.97e-07	1.5e-05
SORBS2	12.6521	0.403745	-1.30848	0.000607336	0.00807912
SYT13	6.79741	0.403827	-1.30819	0.000983168	0.011734
ELFN1	10.2779	0.404003	-1.30756	0.00234338	0.0221789
PHGDH	7.56188	0.404623	-1.30535	8.22e-24	9.36e-21
NT5DC1	23.6051	0.405129	-1.30355	1.06e-06	4.43e-05
USHBP1	3.5024	0.405196	-1.30331	0.00367227	0.0306169
TBL2	4.41893	0.406159	-1.29988	3.71e-05	0.000899616
ARMH4	10.0733	0.40622	-1.29967	7.81e-06	0.000242818
OSBP2	3.15312	0.406663	-1.29809	0.00382811	0.0316345
GNAZ	13.2151	0.407286	-1.29589	0.00119742	0.0135914
COL26A1	114.751	0.407826	-1.29398	6.72e-07	3.01e-05
SLC43A3	7.58443	0.408129	-1.2929	0.00044567	0.0063898
PLPPR3	22.3469	0.408175	-1.29274	7.12e-09	5.48e-07
EEF1A2	24.5695	0.4082	-1.29265	4.76e-05	0.00110154
CTSH	51.309	0.408225	-1.29256	0.0029379	0.0259943
TTC38	6.53743	0.408824	-1.29045	0.000357339	0.00544746
CHAC1	5.30622	0.408923	-1.2901	0.000825072	0.0102164
ZSWIM9	40.3212	0.410533	-1.28443	3.54e-06	0.000125203
OLFML2A	7.79599	0.411164	-1.28221	0.0021081	0.0206058
SYN3	3.17243	0.411327	-1.28164	0.000351448	0.00537073
RNF135	6.55964	0.411621	-1.28061	0.000435148	0.00627485
COL4A5	4.3258	0.412052	-1.2791	1.52e-06	5.98e-05
PROSER2	4.25465	0.412277	-1.27831	0.000631125	0.00831499
PGAP4	13.9607	0.412859	-1.27628	1.2e-05	0.000345367
NLGN2	124.028	0.412887	-1.27618	8.68e-10	8.64e-08
SSBP2	6.6768	0.412955	-1.27594	0.0012965	0.0143773
DDIT4	6.92668	0.413813	-1.27295	0.00671802	0.0476151
ABHD17C	6.49119	0.414512	-1.27051	5.88e-07	2.69e-05
MXRA7	90.7848	0.41452	-1.27049	0.000281186	0.00457452
TYRO3	9.29079	0.415225	-1.26804	6.41e-14	1.64e-11
TNNT1	4.33951	0.415238	-1.26799	0.000177551	0.0032128
HID1	10.1164	0.41555	-1.2669	0.00580734	0.0429586
RWDD3	6.50117	0.416399	-1.26396	0.00585558	0.0432388
PTPRU	28.8255	0.416503	-1.2636	3.15e-09	2.63e-07
IGFBP4	16.2864	0.417604	-1.25979	2.15e-08	1.51e-06
NRP2	10.8425	0.418692	-1.25604	4.28e-07	2.06e-05
PLTP	14.7073	0.418938	-1.25519	3.8e-14	1.03e-11
COL6A3	198.125	0.419966	-1.25165	0.00232816	0.0221016
CTBS	27.6562	0.420079	-1.25127	0.00404135	0.0329058
LARGE2	4.26786	0.421428	-1.24664	8.1e-10	8.19e-08
CTNND2	2.13502	0.421445	-1.24658	0.000232393	0.00391414
MRC2	4.3013	0.421507	-1.24637	9.2e-07	3.93e-05
KCNQ2	52.8275	0.421925	-1.24494	0.00014648	0.00276854
PBXIP1	29.9742	0.423768	-1.23865	2.07e-05	0.000544158
CACNA1A	7.56742	0.423866	-1.23832	0.000118393	0.00233636
CPXM1	100.22	0.424114	-1.23748	1.14e-11	1.88e-09
TOR4A	5.34018	0.42418	-1.23725	0.00630718	0.045738
GAREM2	2.16159	0.424735	-1.23536	0.000113921	0.00225877
CPT1C	218.115	0.425124	-1.23405	1.47e-07	8.11e-06
RARG	9.43015	0.425355	-1.23326	7.4e-07	3.24e-05
SEMA6C	3.33016	0.425846	-1.2316	0.000493215	0.00695217
ZIC5	5.52518	0.426556	-1.22919	6.35e-10	6.68e-08
IFTAP	38.3861	0.428614	-1.22225	0.00213364	0.0207743
FAM171A2	7.55929	0.430096	-1.21727	5.94e-08	3.8e-06
SNCAIP	16.0532	0.43068	-1.21531	0.00393969	0.0323302
NINJ1	3.22401	0.431371	-1.213	0.00151777	0.0161728
NR4A1	2.04736	0.431594	-1.21225	0.000200779	0.00350902
AVEN	5.2128	0.432448	-1.2094	0.00111086	0.0128416
DSE	21.7322	0.433471	-1.20599	3.35e-09	2.76e-07
SERGEF	27.7171	0.43415	-1.20373	0.000780191	0.00974733
MYH14	67.3778	0.434228	-1.20347	1.6e-06	6.25e-05
SLC26A2	36.3049	0.435051	-1.20074	0.000226879	0.00384711
FHL2	11.6513	0.435687	-1.19863	4.55e-05	0.00106277
AP5B1	11.4666	0.436514	-1.1959	1.57e-05	0.000435385
SPTBN2	20.9872	0.436875	-1.19471	1.3e-16	6.76e-14
GSTK1	21.8446	0.43823	-1.19024	0.000974058	0.0116691
MYLK	33.6683	0.441053	-1.18098	1.42e-05	0.000399318
SYNM	3.19563	0.442311	-1.17687	0.00303619	0.0265132
KRT19	6.36295	0.443818	-1.17196	1.51e-10	1.82e-08
CLTCL1	15.4251	0.444477	-1.16982	0.00298012	0.0261329
AXL	10.3199	0.445489	-1.16654	7.83e-06	0.000242818
PHC2	18.8421	0.445494	-1.16652	0.000812709	0.0101032
ADGRG5	52.3947	0.448107	-1.15809	0.00474671	0.0372589
MAPK8IP1	1.28225	0.448209	-1.15776	1.24e-06	5.01e-05
OLFM2	3.19607	0.450139	-1.15156	1.03e-05	0.000303745
HS6ST2	3.19828	0.450799	-1.14944	3.51e-05	0.000858315
ADGRA2	23.8347	0.452092	-1.14531	0.00316711	0.0274082
TRIM36	3.15351	0.453273	-1.14155	0.00163731	0.0170938
TTC7B	4.17117	0.453794	-1.13989	0.00076729	0.00964492
CDH24	9.36477	0.454064	-1.13903	0.000541642	0.00748326
MACROH2A2	26.9705	0.454073	-1.139	3.99e-09	3.17e-07
TRIM24	12.4969	0.455185	-1.13548	9.12e-15	2.72e-12
NAB2	3.07328	0.455532	-1.13438	0.0016685	0.0172508
PTPN13	46.7983	0.458092	-1.12629	1.78e-09	1.62e-07
NFATC1	6.20149	0.459281	-1.12255	0.0012217	0.0138045
CELF2	6.15798	0.459982	-1.12035	0.000286405	0.0046309
ITGA7	1.2367	0.46137	-1.116	2.72e-06	9.89e-05
TMEM256	1.30457	0.461947	-1.1142	0.000689242	0.0088857
SNX7	7.18774	0.462572	-1.11225	0.000307622	0.00487334
TOX3	16.2756	0.462675	-1.11193	4.76e-05	0.00110154
RAB25	51.3627	0.463224	-1.11022	0.000290632	0.00469318
PDE3A	5.946	0.46326	-1.1101	0.00691954	0.0484227
CERS1	5.07861	0.464557	-1.10607	0.0017694	0.0180116
DDB2	32.881	0.465072	-1.10447	1.16e-05	0.00033758
CPNE2	44.8664	0.465098	-1.10439	0.00249133	0.0230227
INSR	1.14168	0.465379	-1.10352	5.43e-07	2.51e-05
H4C9	12.671	0.466198	-1.10099	0.00176333	0.0179791
APLP1	29.1191	0.466757	-1.09926	0.000522571	0.00726786
BTN2A2	5.22628	0.467242	-1.09776	0.00533957	0.0405168
IFT140	1.19965	0.467473	-1.09704	0.000166568	0.0030605
TRIL	108.805	0.467973	-1.0955	0.00021473	0.00370631
HSF2	7.96496	0.468113	-1.09507	0.000663421	0.00864227
GSTZ1	18.3724	0.468792	-1.09298	0.00248717	0.0230182
GABRA5	14.8442	0.469084	-1.09208	0.00150099	0.0161174
IGLON5	7.75004	0.469138	-1.09192	1.51e-05	0.000420895
SEZ6L2	4.36548	0.469286	-1.09146	7.06e-09	5.46e-07
WSCD1	55.1892	0.469559	-1.09062	4.52e-06	0.000154048
SDC1	5.74191	0.469568	-1.09059	3.17e-05	0.000785388
HCN4	6.04491	0.471001	-1.0862	9.47e-05	0.00194601
PIP4P2	12.1924	0.471418	-1.08492	0.0023173	0.0220647
DLGAP1	6.03165	0.473101	-1.07978	0.00511298	0.0391963
GRIP1	10.8061	0.473375	-1.07895	0.00142392	0.0154486
MATN2	3.07886	0.474172	-1.07652	0.00386788	0.0318488
PAQR8	5.1159	0.476069	-1.07076	0.00358048	0.0300315
COL1A2	6.09409	0.476985	-1.06799	1.25e-05	0.000357601
FGF12	88.9633	0.477492	-1.06645	0.00419871	0.0339008
IDH2	7.06099	0.477599	-1.06613	1.18e-06	4.82e-05
AS3MT	13.5427	0.477625	-1.06605	0.00685009	0.0481234
PCDHGC4	12.2708	0.477681	-1.06588	0.0017314	0.0177272
PARP14	26.6371	0.477873	-1.0653	0.000110041	0.00219923
PSME1	15.94	0.478377	-1.06378	8.13e-05	0.00172131
SLC6A8	20.1899	0.478839	-1.06239	1.49e-07	8.17e-06
SNN	5.82447	0.478895	-1.06222	0.00382966	0.0316345
KCNK1	23.0987	0.479115	-1.06156	0.00296563	0.0260788
FOXI3	4.79219	0.480469	-1.05748	0.00214437	0.0208303
FRMD4A	29.0575	0.480498	-1.0574	0.000453646	0.00648931
SALL1	7.91573	0.480798	-1.0565	1.17e-10	1.5e-08
ZNF771	13.6853	0.480831	-1.0564	0.00187058	0.0187822
CETN3	24.1606	0.481075	-1.05567	0.00476895	0.0373732
GCHFR	124.266	0.481244	-1.05516	0.006416	0.046286
TMEM132B	7.9414	0.481454	-1.05453	3.59e-09	2.88e-07
DTWD1	5.12811	0.485373	-1.04283	0.0055235	0.0414958
CLCN2	37.4659	0.485486	-1.0425	0.00333069	0.0284505
CITED2	11.9737	0.48633	-1.03999	5.86e-07	2.69e-05
CDH2	25.4801	0.48774	-1.03582	5.8e-08	3.73e-06
ACVR1B	7.06883	0.487914	-1.0353	0.000181115	0.00325151
SRSF8	17.8501	0.488914	-1.03235	0.000369166	0.00559374
POC1B	21.977	0.489117	-1.03175	0.00319383	0.0275769
SLC6A15	51.8182	0.489505	-1.03061	0.00163831	0.0170938
SELENOW	20.289	0.489566	-1.03043	0.0027598	0.0247963
SESN3	2.0379	0.489737	-1.02992	0.00131374	0.01453
MYO1C	5.99594	0.490502	-1.02767	4.6e-06	0.000155323
APPL2	3.86802	0.490916	-1.02645	0.00221806	0.0214629
LOXL3	11.4299	0.491864	-1.02367	0.000371129	0.00560126
SHF	14.0658	0.492199	-1.02269	0.00238491	0.0224442
KCTD14	3.03895	0.495395	-1.01335	0.00252606	0.0232068
ERAP1	18.1433	0.496668	-1.00965	0.000585552	0.00793595
ALPL	3.86141	0.49784	-1.00625	1.66e-11	2.7e-09
PTPN21	45.058	0.497891	-1.0061	0.00352539	0.0297086
SFRP2	77.0525	0.498196	-1.00521	1.07e-14	3.11e-12
ETNK1	3.77425	0.498428	-1.00454	9.69e-05	0.00198355
CCDC136	10.8738	0.498518	-1.00428	6.95e-05	0.00151219
THBS4	6.69494	0.498617	-1.004	0.000454384	0.00649246
SKIL	2.92066	2.00284	1.00205	8.43e-10	8.45e-08
PMEPA1	45.2355	2.00723	1.0052	0.000658497	0.0086044
CHM	29.3256	2.00924	1.00665	0.000989479	0.0117591
PHLPP2	57.633	2.011	1.00791	4.77e-06	0.000159618
ELAVL2	1.99456	2.01397	1.01004	7.53e-05	0.00161072
PCDHB15	5.91879	2.01852	1.0133	0.00655569	0.047007
COQ7	10.424	2.0186	1.01335	0.00503517	0.038972
CPEB4	22.148	2.02231	1.01601	0.00250664	0.0230961
TAOK3	8.24621	2.03328	1.02381	9.32e-05	0.00192
POMK	7.0152	2.04189	1.02991	8.91e-06	0.00027195
MRPL46	2.95652	2.04207	1.03003	4.56e-05	0.00106277
ZNF675	2.74261	2.04457	1.0318	3.78e-05	0.000911666
DBNDD1	11.374	2.04961	1.03535	0.00140076	0.0152634
CTSA	14.5707	2.05365	1.03819	2.13e-06	7.96e-05
SMYD2	26.0688	2.05373	1.03825	0.00688436	0.0482483
DLL3	10.6814	2.05497	1.03911	0.00148179	0.0159522
SCFD2	1.93362	2.05625	1.04001	0.000325203	0.00506856
DCLRE1B	5.69516	2.05774	1.04106	0.000494483	0.0069544
PTGFRN	3.10931	2.06221	1.04419	1.51e-09	1.38e-07
VAV3	25.3589	2.06653	1.04721	0.00344505	0.0291886
PIM2	10.2614	2.0668	1.0474	3.57e-09	2.88e-07
RBM19	12.3057	2.06697	1.04752	1.66e-10	1.95e-08
JUN	3.62741	2.06998	1.04962	0.000966599	0.0116131
ARRDC3	9.78721	2.08112	1.05736	0.00564377	0.0421466
TMEM108	20.4825	2.08252	1.05833	0.000560998	0.00767453
PHLDA3	2.95696	2.08296	1.05863	0.000786349	0.00980472
ARMT1	6.01685	2.08454	1.05973	2.18e-09	1.94e-07
CASP3	49.5778	2.09337	1.06583	5.52e-08	3.59e-06
WDR44	64.9988	2.10079	1.07093	2.16e-08	1.51e-06
ZNF808	11.6374	2.10121	1.07122	0.00027564	0.004521
ZDHHC22	15.2204	2.10147	1.0714	0.00016888	0.00308821
REC8	10.9725	2.10605	1.07454	6.55e-06	0.000211994
CCN1	7.58391	2.10623	1.07466	1.79e-07	9.52e-06
TRIM6	1.84674	2.1172	1.08216	0.00593513	0.0436975
LRRTM4	2.66404	2.12313	1.08619	0.00118668	0.0134939
AAK1	33.0134	2.12811	1.08958	0.00012226	0.00239007
FAM71E1	26.4937	2.13232	1.09242	0.00532862	0.0404684
RAB15	10.8063	2.13964	1.09737	0.000144871	0.00274226
TSHZ3	14.9377	2.14065	1.09805	8.21e-05	0.00172808
FAM160B2	7.63455	2.14361	1.10004	2.97e-05	0.000742663
GPAM	10.6513	2.15208	1.10573	3.77e-05	0.000911096
ZNF17	17.6797	2.15424	1.10718	0.00622988	0.0454377
SMG9	14.9303	2.16063	1.11145	0.00362505	0.0302837
CHCHD2	17.1039	2.16147	1.11201	7.76e-06	0.000241913
UPP1	22.779	2.16409	1.11376	1.55e-05	0.000430244
CYB561	7.45006	2.18074	1.12482	0.000473294	0.00672431
KSR1	69.5155	2.18183	1.12554	1.87e-05	0.000496654
ACHE	38.5841	2.18279	1.12617	0.00463486	0.0366432
STX10	8.35957	2.1854	1.1279	0.000602118	0.00805048
BAK1	8.3081	2.18659	1.12868	0.000126993	0.00244823
CCND2	7.77599	2.19619	1.13501	0.000785542	0.00980441
MEST	6.41049	2.20605	1.14146	5.45e-11	7.85e-09
FRMPD3	9.46537	2.21383	1.14655	0.000247809	0.00412389
ZYG11A	2.75704	2.21415	1.14675	0.00126068	0.0140548
BCL11B	36.6713	2.22077	1.15106	0.000600183	0.00805048
SURF6	19.6903	2.22579	1.15432	6.47e-15	1.98e-12
UTF1	21.461	2.23039	1.15729	0.000346545	0.00532176
FAM199X	6.83742	2.24628	1.16753	2.69e-07	1.37e-05
ZNF613	21.2841	2.24789	1.16857	0.00151454	0.0161618
COX10	8.61174	2.25414	1.17258	1.16e-05	0.000337573
H2AW	6.56972	2.25939	1.17593	0.0002211	0.00379534
GOSR1	13.8536	2.26253	1.17794	0.00186464	0.0187376
RPUSD1	46.2654	2.26328	1.17842	4.56e-05	0.00106277
TLL2	3.6889	2.27117	1.18344	0.000624554	0.00825257
USP12	26.9037	2.28522	1.19233	6.82e-05	0.00149186
IBA57	17.2247	2.29765	1.20016	0.00025476	0.00422275
KIAA1217	60.721	2.29814	1.20046	4.98e-13	1.06e-10
TNFSF11	73.7973	2.29821	1.20051	0.00280656	0.0251567
SYNJ1	31.3741	2.29848	1.20068	0.00484977	0.037819
SLC2A6	20.5016	2.2998	1.20151	7.93e-06	0.000245506
DCAF4	15.6237	2.30182	1.20277	4.38e-06	0.000149895
SLC16A10	8.97006	2.31259	1.20951	0.000665714	0.00866258
DOCK11	51.3441	2.318	1.21288	2.31e-06	8.56e-05
C15orf39	6.34144	2.32075	1.21459	1.44e-09	1.33e-07
DNAJC15	14.7911	2.33127	1.22112	0.00465827	0.036805
MOB3B	20.4924	2.33321	1.22231	4.98e-05	0.00113987
FBXO25	6.71692	2.34989	1.23259	0.00299343	0.0262129
PCDHB3	33.6066	2.3518	1.23376	0.00104403	0.0122498
SESTD1	56.5377	2.40484	1.26594	7e-08	4.34e-06
HEY2	15.5802	2.40602	1.26665	5.37e-05	0.00121786
VAMP8	13.7492	2.40991	1.26898	0.000154449	0.00288005
TSHZ1	5.4741	2.42032	1.2752	0.00338278	0.0287691
NLRP12	33.9117	2.42322	1.27693	7.31e-07	3.22e-05
LAD1	88.7457	2.42346	1.27707	1.44e-06	5.73e-05
TBC1D23	3.50862	2.42829	1.27994	9.29e-11	1.27e-08
TSPAN18	90.3774	2.43493	1.28388	0.000196985	0.00346687
TRHDE	5.48932	2.4381	1.28576	0.0013597	0.0148689
PRKAR2B	13.3868	2.44818	1.29171	8.82e-09	6.7e-07
CREM	3.67272	2.45025	1.29293	0.0033195	0.0283968
JADE2	3.69341	2.45233	1.29415	1.51e-09	1.38e-07
RPS6KL1	66.3708	2.46151	1.29955	0.00275746	0.0247963
HTD2	11.1323	2.49751	1.32049	0.000165747	0.00304989
CPT1A	261.718	2.49929	1.32152	6.73e-07	3.01e-05
NRK	3.48148	2.50681	1.32585	0.000119946	0.00236329
MECOM	15.8509	2.51751	1.332	9.38e-06	0.000282775
MMP24	5.59801	2.52596	1.33683	3.23e-06	0.000115692
ACOT2	23.9929	2.5301	1.3392	0.00118535	0.013491
SCGB3A2	13.7017	2.53648	1.34283	1.89e-06	7.19e-05
KLF7	5.4919	2.54088	1.34533	0.000129758	0.0024977
MT1HL1	8.58046	2.54795	1.34934	0.000279521	0.00456672
CCDC80	32.3761	2.55204	1.35165	0.00336755	0.0287067
GDF3	9.95573	2.58263	1.36884	4.63e-12	8.3e-10
MPP1	8.13862	2.60375	1.38059	0.00208893	0.0204662
ATRNL1	25.9001	2.60605	1.38186	5.26e-07	2.45e-05
H1-2	35.5419	2.60857	1.38326	6.67e-16	2.98e-13
IQSEC2	3.75191	2.61038	1.38426	4.63e-13	1e-10
HMGB3	13.754	2.61204	1.38518	5e-15	1.59e-12
H1F0	4.49835	2.64259	1.40195	9.22e-16	3.98e-13
ZNF680	185.089	2.68237	1.42351	0.00286247	0.02552
MID2	2.7006	2.68626	1.4256	0.00245807	0.0228333
CHST8	3.59638	2.73553	1.45182	6.92e-11	9.83e-09
SSTR2	13.7267	2.74126	1.45484	0.00018737	0.0033304
GSTO2	7.60109	2.75974	1.46453	7.34e-06	0.000232788
ZNF578	14.62	2.76143	1.46542	0.000165164	0.00304812
RBM18	7.07801	2.76235	1.4659	0.000679277	0.00879341
PITPNM2	4.43459	2.76865	1.46918	3.76e-05	0.000908765
IRX4	45.2497	2.82642	1.49898	0.00100142	0.0118608
H2AC6	3.5097	2.83469	1.50319	8.31e-08	4.98e-06
ENPP2	2.74703	2.83779	1.50477	1.36e-05	0.000386053
FBXO8	43.4199	2.85432	1.51315	0.00546653	0.0412161
A4GALT	9.1345	2.85925	1.51564	1.76e-06	6.77e-05
HENMT1	16.2167	2.86062	1.51633	0.000153627	0.00287329
STK17B	22.6983	2.86327	1.51767	0.000556712	0.00764092
RGS16	19.5504	2.86846	1.52027	0.000392279	0.00583261
ZNF850	11.8812	2.86951	1.52081	3.98e-11	5.86e-09
CLUH	5.35688	2.88635	1.52925	2.19e-27	3.92e-24
UAP1L1	29.4418	2.89055	1.53134	0.00128604	0.014274
MMP9	0.601336	2.89404	1.53308	9.82e-06	0.000291469
DACT1	33.3349	2.90546	1.53877	2.24e-09	1.96e-07
KLKB1	31.044	2.91049	1.54126	7.62e-06	0.000240016
SEMA3A	21.1836	2.91594	1.54396	2.33e-15	8.1e-13
SYT11	11.6285	2.92208	1.54699	4.06e-05	0.000967354
DPPA2	10.904	2.92442	1.54815	4.74e-05	0.00110154
IPMK	7.22676	2.92598	1.54892	7.21e-07	3.19e-05
ATP6V0E1	20.2005	2.95029	1.56086	5.94e-05	0.00133144
PACSIN1	79.2265	2.96724	1.56912	0.0001	0.00203732
DMTN	18.9209	2.97434	1.57257	0.00404432	0.0329087
SCARA3	83.33	2.97767	1.57418	1.68e-08	1.22e-06
ADAM19	8.17685	2.97869	1.57468	1.01e-09	9.92e-08
CAV1	5.46588	2.99942	1.58468	7.61e-06	0.000240016
ZNF501	5.42801	3.03091	1.59975	0.00665395	0.0473476
KLF6	52.1231	3.03218	1.60036	1.26e-06	5.07e-05
H2BC12	9.08874	3.03471	1.60156	1.1e-06	4.59e-05
OLIG3	6.30311	3.05277	1.61012	0.000385452	0.00575012
TIMP4	6.37523	3.06036	1.6137	0.000123147	0.00240366
RHOH	98.6338	3.06984	1.61817	5.22e-07	2.44e-05
DNAJA4	19.7865	3.11604	1.63971	0.00608107	0.0445625
PCSK1	4.51082	3.14755	1.65423	0.000918217	0.0111386
SIPA1L2	14.4429	3.15114	1.65587	4.84e-09	3.81e-07
HPDL	40.6463	3.16434	1.6619	9.46e-11	1.27e-08
ACTRT3	48.513	3.16513	1.66227	0.000185134	0.00330944
GNA14	41.0184	3.17026	1.6646	1.79e-05	0.000480176
ZNF660	7.75936	3.2078	1.68158	0.000304676	0.00484505
FAT4	2.74379	3.21873	1.68649	1.9e-16	9.52e-14
JAZF1	15.8676	3.26039	1.70504	5.09e-05	0.00116237
NRROS	8.24296	3.27288	1.71056	1.2e-10	1.52e-08
ZNF718	3.61081	3.29965	1.72231	0.000137039	0.00261774
ADAMTS16	9.74012	3.30513	1.72471	1.34e-15	5.07e-13
TSPYL5	21.0641	3.31052	1.72706	0.000241122	0.00404332
MPPED2	25.3194	3.32162	1.73189	0.00637347	0.046112
SPP1	4.84994	3.33554	1.73792	3.41e-09	2.79e-07
CENPBD1	3.61637	3.34898	1.74372	0.00321823	0.0277547
ZNF860	26.8448	3.45852	1.79015	0.000822628	0.0101962
FAM83E	27.0576	3.46244	1.79179	0.0039018	0.0320613
RENBP	14.2266	3.46461	1.79269	2.32e-05	0.0006048
MTSS1	15.9804	3.47203	1.79578	6.82e-06	0.000219731
HS3ST5	12.7044	3.48511	1.80121	0.00159091	0.0167668
SAMD4A	7.10556	3.49393	1.80485	8.92e-06	0.00027195
FOXP4	9.48972	3.5439	1.82534	3.17e-14	8.83e-12
PCSK5	4.42655	3.57357	1.83737	1.43e-09	1.33e-07
NETO2	9.85403	3.59835	1.84734	1.51e-15	5.4e-13
MRPL45	7.83195	3.61737	1.85494	0.00353002	0.0297276
MFAP3L	27.4483	3.65824	1.87115	1.01e-07	5.93e-06
SGK1	8.05814	3.67055	1.876	3.56e-13	7.84e-11
ADAMTSL1	8.52595	3.73973	1.90293	9.41e-05	0.00193631
PLBD1	622.366	3.75696	1.90957	5.52e-14	1.47e-11
EXOC3L1	31.0024	3.78118	1.91884	0.000188473	0.00334526
RAB17	0.409728	3.7816	1.919	2.19e-09	1.94e-07
LRRC61	15.8909	3.84437	1.94275	2.09e-06	7.85e-05
DOK3	106.972	3.93304	1.97564	0.00212124	0.020718
LGALS1	12.3764	3.99982	1.99994	2.46e-08	1.7e-06
PIK3AP1	7.87531	4.0025	2.0009	1.73e-05	0.000469353
PLEKHA2	19.0742	4.05545	2.01986	1.41e-05	0.000396133
NEFH	28.194	4.1044	2.03717	3.07e-08	2.08e-06
F3	4.20818	4.10935	2.03891	0.000391139	0.00582801
PARM1	38.1774	4.13078	2.04642	0.000990949	0.0117591
ACP5	96.28	4.24021	2.08413	0.000699666	0.00896474
EBF2	21.0244	4.27213	2.09496	0.000413393	0.00603054
NODAL	7.04781	4.34673	2.11993	7.56e-14	1.89e-11
SLC39A4	209.44	4.36783	2.12692	9.07e-06	0.000275053
GAP43	2.65409	4.46505	2.15868	2.23e-13	5.28e-11
TENM1	573.671	4.60731	2.20392	1.23e-15	5.07e-13
SH3BP5	6.83371	4.63009	2.21104	2.91e-08	1.99e-06
MCAM	5.98253	4.6988	2.23229	6.09e-14	1.59e-11
PCDHA1	5.87334	4.92602	2.30042	1.44e-06	5.73e-05
PCDHGB5	4.55218	5.07412	2.34316	1.75e-07	9.39e-06
PTPRB	5.96872	5.54274	2.4706	5.64e-08	3.64e-06
CSRP1	22.5708	5.58835	2.48242	3.15e-07	1.58e-05
HHLA1	71.9814	5.67547	2.50474	1.27e-16	6.76e-14
SVEP1	12.8618	5.69487	2.50966	4.79e-05	0.00110501
AC100868.1	21.1366	5.69495	2.50968	6.5e-05	0.00143902
SKOR2	4.50192	5.89258	2.5589	0.00011053	0.00220549
FGF4	4.42514	5.9734	2.57855	1.86e-05	0.000493652
ABHD12B	15.566	5.9941	2.58354	1.82e-08	1.31e-06
GUCY1B1	3.54078	6.07156	2.60207	6.08e-09	4.73e-07
GRIA1	4.23882	6.17705	2.62692	0.000168371	0.00308459
LRFN5	16.7047	6.39625	2.67723	3.19e-11	4.81e-09
IL6R	149.033	6.60221	2.72295	1.55e-05	0.000430244
LEFTY2	31.785	7.12021	2.83192	1.89e-22	1.83e-19
DMD	40.0789	8.26605	3.0472	1.17e-25	1.84e-22
MDGA2	6.25264	8.36756	3.06481	1.06e-10	1.38e-08
SH3RF3	14.5773	8.38376	3.0676	0.000216524	0.00373214
DPPA3	61.2985	8.47221	3.08274	3.15e-09	2.63e-07
KLF4	6.70029	8.8041	3.13818	2.18e-12	4.2e-10
LOXHD1	5.21422	8.93231	3.15903	3.63e-06	0.000127322
MX2	11.2988	9.36471	3.22723	4.26e-10	4.6e-08
HPGD	2.46204	9.95938	3.31606	3.05e-05	0.00075968
PAX6	34.5341	10.8625	3.44128	1.87e-09	1.68e-07
FOXL2	13.9931	12.6958	3.66628	1.13e-06	4.67e-05
ZNF880	20.5071	18.3465	4.19743	3.25e-06	0.000116113
PCDHGA2	11.2082	22.4897	4.49119	3.19e-07	1.59e-05
TDRD1	2.66045	29.368	4.87617	3.25e-08	2.18e-06
C9orf64	19.5596	89.5802	6.48511	7.93e-10	8.07e-08
ZNF229	6.07993	107.513	6.74836	3.48e-10	3.83e-08
ZNF560	10.4029	129.798	7.02013	2.82e-11	4.36e-09

## Sheet:  DAP5 transl. regulated genes 
Gene Name	BaseMean	ratio shDAP5/shNT	log2FC (shDAP5/shNT)	pvalue
GRIN2A	14.7726	0.157586	-2.66579	9.99579e-05
SLC35A4	88.3938	0.17127	-2.54566	0.00034023
MAPK6	266.497	0.246257	-2.02176	2.71399e-11
KIF3C	102.42	0.266956	-1.90533	7.03273e-14
DMD	117.538	0.27743	-1.8498	2.89786e-06
CCDC88A	195.846	0.306638	-1.70539	3.12189e-08
GALNT3	48.2563	0.330045	-1.59927	1.59361e-05
LRP3	127.478	0.349556	-1.51641	0.00036212
GPBP1L1	91.3389	0.353014	-1.5022	8.8654e-09
ROCK1	132.248	0.355915	-1.4904	3.463e-05
PRDM4	47.6498	0.356754	-1.487	4.53261e-05
H2BC12	123.514	0.357157	-1.48537	0.000106079
TMEM184C	41.5968	0.369755	-1.43536	3.42384e-05
H2AC6	675.136	0.385194	-1.37634	2.23091e-05
CAMSAP2	93.3508	0.389133	-1.36167	6.18651e-05
RC3H2	74.9473	0.394185	-1.34305	3.23743e-06
KIAA0232	86.5805	0.402967	-1.31127	8.39005e-07
PCNX3	204.698	0.407142	-1.2964	7.9064e-07
H1-2	2369.44	0.415208	-1.26809	1.26094e-09
MFHAS1	197.819	0.416533	-1.2635	1.98127e-06
WWP1	74.0273	0.434806	-1.20156	5.62316e-06
NETO2	85.3352	0.435649	-1.19876	0.000363708
PPP4R3B	86.2035	0.440931	-1.18138	4.94338e-06
MAP3K11	81.7165	0.450201	-1.15136	0.000970061
SLF2	53.5882	0.451812	-1.14621	0.000788889
OTUD4	115	0.452469	-1.14411	5.80354e-07
AZIN1	268.637	0.469185	-1.09177	2.51541e-06
BMP2K	63.6057	0.473113	-1.07974	7.76673e-05
WWC1	67.5292	0.473651	-1.0781	0.000267976
CCNI	280.86	0.475087	-1.07374	4.62177e-05
BECN1	55.0987	0.482271	-1.05209	0.000351095
UBN1	112.468	0.489194	-1.03152	6.87547e-06
MAPKAP1	143.288	0.490562	-1.02749	6.12813e-07
DENND5A	119.93	0.493571	-1.01867	0.000144096
QSER1	419.557	0.5008	-0.997693	2.23239e-07
CHD3	100.027	0.501085	-0.996873	0.000242379
XPO6	255.745	0.510001	-0.971427	4.83003e-08
ANKRD11	73.4886	0.510087	-0.971186	0.000354679
MARK3	110.21	0.51159	-0.96694	0.000104011
POMK	81.3947	0.524584	-0.930755	0.000823587
CUL5	62.925	0.524867	-0.929975	0.000871182
DICER1	213.915	0.528446	-0.920173	4.91207e-06
SP4	79.9922	0.529264	-0.91794	0.000459368
TNFRSF21	96.8549	0.532266	-0.90978	0.000613214
MPRIP	238.304	0.535081	-0.90217	2.03949e-05
PROSER1	193.675	0.542742	-0.881662	2.23062e-06
TBL1XR1	121.209	0.546741	-0.871072	0.00099115
PTPN12	203.872	0.550808	-0.860379	0.000146402
SMO	142.522	0.553828	-0.85249	0.000547851
MED13	141.722	0.557254	-0.843593	0.000227065
KMT2D	778.756	0.5689	-0.813754	0.000486638
PDCD11	385.631	0.581378	-0.782453	7.45773e-06
HAUS6	136.229	0.583816	-0.776415	0.000282009
CHSY1	189.9	0.593394	-0.752938	9.66992e-05
TOP2B	508.759	0.594772	-0.74959	0.000588313
ZBED4	149.031	0.599275	-0.738711	0.000506953
SETD5	311.487	0.601615	-0.733087	2.42807e-06
TRIM71	944.209	0.604881	-0.725278	0.000590158
NCKAP1	457.578	0.629972	-0.666641	0.000675551
RNF10	241.509	0.634957	-0.655269	0.000904454
BCL9	165.073	0.635176	-0.654771	0.000337552
LGR4	286.921	0.647638	-0.62674	0.00018781
WNK1	581.656	0.649969	-0.621557	0.000665638
CDC42BPB	337.068	0.653355	-0.61406	0.000195826
ADNP	454.641	0.654759	-0.610965	0.000450796
ARHGAP35	267.066	0.657687	-0.604528	0.000520905
PAPOLA	316.529	0.658415	-0.602932	0.000978617
ZNF462	522.55	0.658417	-0.602927	0.00095205
PCDHA3	14.6204	37.1359	5.21474	1.12647e-06
DND1	23.5908	6.15479	2.62171	1.40158e-06
PCDHA11	45.4291	5.66188	2.50128	2.25921e-09
PLP1	31.2639	2.78877	1.47963	0.00021158
H3C11	1047.89	2.5754	1.3648	4.35776e-05
CBX6	34.3388	2.48486	1.31316	0.00017223
ST5	60.3457	2.3754	1.24817	4.78992e-05
VWA1	62.4098	2.28662	1.19321	0.000243389
FTH1	947.847	2.2296	1.15679	3.36298e-13
CCNB1IP1	121.199	2.02272	1.0163	0.000345665
GTF2F1	158.855	1.65099	0.723331	0.000109763
FTL	702.982	1.62076	0.696669	2.4534e-06
RPS16	1607.8	1.61047	0.687483	4.35678e-05
RPS8	2534.03	1.5746	0.654985	2.35958e-06
RPL37	1384.67	1.56969	0.650476	0.000522155
RPS27	994.503	1.53454	0.617806	0.0009895

## Sheet: Total mRNA analysis
	Normalized Reads									DESeq2 analysis - shDAP5 vs shNT Total
ID	NT_total_1	NT_total_2	NT_total_3	NT_total_4	DAP5_total_1	DAP5_total_2	DAP5_total_3	DAP5_total_4		baseMean	log2FoldChange	pvalue	padj
A1BG	26.0061	37.055	28.8641	11.4724	14.419	20.7049	32.6681	8.66059		17.6115	-0.413191	0.434825	0.662951
A2ML1	16.7182	20.5861	38.4855	29.5004	48.0632	44.5951	36.2979	32.9102		32.7713	0.630365	0.0388751	0.154453
A4GALT	18.5758	24.7033	36.0802	11.4724	60.079	46.1878	76.2255	67.5526		31.2243	1.51564	1.76018e-06	6.76764e-05
AAAS	124.458	102.931	144.321	98.3348	98.5296	101.932	166.97	105.659		165.531	0.0214616	0.921469	0.965017
AACS	191.331	139.985	211.67	154.058	223.494	168.824	234.121	159.355		215.98	0.171757	0.340836	0.581565
AADACL3	0	0	0	0	2.40316	6.37073	5.44468	8.66059		2.43433	4.01687	0.00110754	0.0128268
AADAT	22.2909	22.6447	31.2695	22.9448	26.4348	27.0756	30.8532	36.3745		25.4665	0.308173	0.347246	0.588496
AAGAB	31.5788	51.4653	24.0534	49.1674	43.2569	39.8171	34.483	38.1066		59.9799	-0.036558	0.89273	0.955321
AAK1	31.5788	30.8792	19.2428	14.7502	45.66	49.3732	47.1872	60.6241		42.9216	1.08958	0.00012226	0.00239007
AAMDC	7.43031	2.05861	4.81069	4.91674	14.419	17.5195	5.44468	10.3927		16.2051	1.29497	0.0246222	0.113979
AAMP	185.758	152.337	187.617	149.141	213.881	197.493	166.97	180.14		226.545	0.16887	0.382329	0.620616
AAR2	113.312	107.048	120.267	101.613	112.949	121.044	110.708	91.8022		106.334	-0.0130734	0.940662	0.971881
AARS	639.007	765.803	714.387	714.566	540.711	533.549	549.913	552.546		800.724	-0.380166	0.019031	0.0950487
AARS2	79.8759	69.9927	98.6191	93.418	105.739	105.117	105.264	90.0701		68.9963	0.248488	0.31555	0.556531
AASDH	50.1546	49.4066	57.7283	68.8343	36.0474	43.0024	59.8915	51.9635		48.3757	-0.239286	0.379245	0.618251
AASDHPPT	83.591	59.6997	40.8908	78.6678	69.6916	63.7073	68.9659	60.6241		98.0237	-0.0329258	0.882384	0.950884
AASS	365.943	389.077	394.476	426.117	523.889	488.954	493.651	490.189		323.776	0.340994	0.180856	0.409377
AATK	14.8606	12.3517	36.0802	14.7502	12.0158	19.1122	10.8894	6.92847		9.49471	-0.622859	0.208059	0.443852
ABAT	18.5758	18.5275	12.0267	8.19456	26.4348	15.9268	7.25957	13.8569		22.0127	0.112014	0.795123	0.899684
ABCA1	44.5819	26.7619	38.4855	49.1674	31.2411	20.7049	21.7787	62.3562		32.1459	-0.232895	0.520881	0.732235
ABCA2	81.7335	69.9927	132.294	73.7511	28.8379	57.3366	59.8915	29.446		43.1292	-0.994863	0.000843617	0.0104046
ABCA3	39.0092	32.9378	96.2138	65.5565	19.2253	23.8902	14.5191	17.3212		26.616	-1.62192	1.62111e-05	0.000446464
ABCA5	3.71516	8.23444	4.81069	3.27783	2.40316	3.18536	1.81489	6.92847		2.82492	-0.430194	0.60542	0.789339
ABCA7	35.294	53.5239	141.915	72.1122	31.2411	43.0024	65.3362	55.4278		45.5329	-0.60696	0.0859801	0.259442
ABCB10	39.0092	37.055	50.5122	32.7783	62.4822	52.5585	70.7808	45.0351		33.4844	0.545447	0.0420395	0.161793
ABCB6	78.0183	67.9341	72.1603	63.9176	57.6758	82.8195	119.783	76.2132		73.0676	0.270076	0.253587	0.49375
ABCB7	102.167	123.517	86.5924	119.641	124.964	95.5609	98.0042	131.641		124.792	0.047557	0.832214	0.92222
ABCB8	27.8637	39.1136	52.9176	39.3339	16.8221	39.8171	50.817	39.8387		34.0578	-0.0619677	0.837282	0.924699
ABCB9	7.43031	6.17583	24.0534	11.4724	14.419	11.1488	18.1489	8.66059		8.64963	0.125915	0.801227	0.902974
ABCC1	356.655	275.854	428.151	327.783	334.039	286.683	379.313	332.567		329.412	-0.0573121	0.75775	0.881731
ABCC10	57.5849	86.4616	93.8084	63.9176	74.498	84.4122	90.7447	51.9635		52.7563	0.0176787	0.93928	0.971485
ABCC4	35.294	39.1136	48.1069	52.4452	7.20948	14.3341	10.8894	13.8569		30.025	-1.87799	1.56568e-07	8.48525e-06
ABCC5	118.885	74.11	113.051	99.9737	96.1264	93.9683	117.968	112.588		94.8845	0.0544693	0.759508	0.882144
ABCC8	5.57274	10.2931	7.21603	3.27783	2.40316	3.18536	0	3.46424		2.91343	-1.49082	0.0924333	0.271642
ABCD1	22.2909	26.7619	45.7015	31.1393	28.8379	15.9268	47.1872	22.5175		21.864	-0.131269	0.708524	0.853867
ABCD3	46.4395	51.4653	33.6748	39.3339	36.0474	36.6317	43.5574	51.9635		67.4121	-0.020475	0.935547	0.970012
ABCD4	81.7335	65.8755	88.9977	81.9456	79.3043	54.1512	85.3	62.3562		61.2333	-0.194068	0.36092	0.600946
ABCE1	250.773	228.506	158.753	204.864	240.316	283.497	234.121	258.086		324.984	0.266763	0.149727	0.3646
ABCF3	66.8728	39.1136	62.5389	49.1674	91.3201	63.7073	87.1149	67.5526		79.0531	0.496941	0.0248618	0.114749
ABCG1	9.28789	16.4689	14.4321	6.55565	2.40316	3.18536	1.81489	6.92847		7.26745	-1.63246	0.0141191	0.0786931
ABCG2	3.71516	2.05861	4.81069	4.91674	4.80632	3.18536	7.25957	8.66059		6.81436	0.62308	0.466165	0.689937
ABHD10	55.7274	45.2894	28.8641	36.0561	45.66	44.5951	43.5574	46.7672		60.9753	0.109833	0.68698	0.840986
ABHD11	24.1485	30.8792	24.0534	22.9448	12.0158	11.1488	27.2234	13.8569		27.0413	-0.657138	0.0726006	0.233331
ABHD12	92.8789	69.9927	76.971	90.1402	100.933	103.524	125.228	72.7489		96.2073	0.277703	0.222704	0.461121
ABHD12B	5.57274	8.23444	7.21603	6.55565	45.66	46.1878	29.0383	43.3029		28.5205	2.58354	1.82466e-08	1.30656e-06
ABHD13	37.1516	28.8205	16.8374	27.8615	24.0316	31.8536	32.6681	36.3745		24.5952	0.168443	0.595827	0.783463
ABHD14A	3.71516	2.05861	4.81069	13.1113	4.80632	0	3.62979	1.73212		3.42416	-1.38443	0.128899	0.333381
ABHD14A-ACY1	1.85758	4.11722	4.81069	3.27783	0	0	0	0		4.07114	-3.32573	0.00666303	0.0473476
ABHD14B	13.0031	8.23444	12.0267	13.1113	7.20948	6.37073	12.7043	8.66059		11.9931	-0.415588	0.421543	0.653595
ABHD15	3.71516	4.11722	24.0534	6.55565	12.0158	15.9268	23.5936	12.1248		7.83984	0.823606	0.133645	0.341008
ABHD16B	24.1485	22.6447	36.0802	18.028	21.6284	20.7049	34.483	24.2496		12.7413	0.0327971	0.931252	0.968344
ABHD17A	222.909	205.861	262.182	168.808	225.897	175.195	255.9	162.819		109.468	-0.0665898	0.732012	0.867773
ABHD17B	68.7304	94.6961	101.024	90.1402	86.5138	87.5975	78.0404	88.338		104.233	-0.0498688	0.803132	0.903983
ABHD17C	109.597	90.5789	91.4031	83.5845	45.66	33.4463	36.2979	41.5708		46.2411	-1.27051	5.87812e-07	2.68541e-05
ABHD18	22.2909	16.4689	24.0534	39.3339	21.6284	33.4463	18.1489	41.5708		30.5511	0.164055	0.616581	0.796779
ABHD2	50.1546	43.2308	28.8641	24.5837	19.2253	19.1122	30.8532	22.5175		43.4547	-0.672049	0.030561	0.131838
ABHD3	11.1455	10.2931	12.0267	13.1113	7.20948	3.18536	7.25957	12.1248		14.9555	-0.663795	0.195367	0.427473
ABHD4	44.5819	30.8792	26.4588	29.5004	31.2411	35.039	45.3723	29.446		48.2928	0.0970786	0.729082	0.866039
ABHD5	31.5788	24.7033	24.0534	24.5837	16.8221	31.8536	29.0383	13.8569		22.2174	-0.175843	0.615828	0.796217
ABHD6	9.28789	2.05861	12.0267	6.55565	2.40316	4.77805	9.07447	5.19635		7.26505	-0.422963	0.524024	0.733774
ABHD8	50.1546	45.2894	62.5389	50.8063	14.419	38.2244	38.1128	29.446		28.9854	-0.751867	0.013997	0.0783371
ABI1	46.4395	69.9927	52.9176	68.8343	40.8537	50.9658	45.3723	46.7672		71.1021	-0.368269	0.10077	0.286468
ABI2	107.74	96.7547	108.24	127.835	64.8853	100.339	78.0404	119.516		104.807	-0.265986	0.165939	0.388525
ABI3	1.85758	6.17583	0	9.83348	4.80632	3.18536	3.62979	0		2.8389	-0.756373	0.404547	0.638726
ABITRAM	7.43031	4.11722	0	4.91674	9.61264	4.77805	5.44468	5.19635		7.98801	0.467274	0.491322	0.708733
ABL1	417.955	384.96	399.287	393.339	562.339	447.544	600.73	510.975		326.569	0.408349	0.00445004	0.0354955
ABL2	89.1638	100.872	81.7817	63.9176	105.739	95.5609	114.338	71.0168		67.0161	0.204999	0.356537	0.596498
ABLIM1	68.7304	57.6411	40.8908	57.3619	76.9011	116.266	63.5213	93.5343		75.4205	0.639795	0.00425082	0.0342297
ABR	39.0092	100.872	110.646	68.8343	43.2569	38.2244	54.4468	48.4993		53.3453	-0.772662	0.00531624	0.0403989
ABRACL	63.1577	55.5825	86.5924	109.807	50.4664	98.7463	58.0766	86.6059		143.221	-0.0900657	0.751562	0.87834
ABRAXAS1	18.5758	30.8792	21.6481	31.1393	19.2253	30.261	5.44468	20.7854		28.1807	-0.423048	0.234101	0.47376
ABRAXAS2	24.1485	37.055	16.8374	26.2226	38.4506	38.2244	29.0383	29.446		37.2994	0.3555	0.237828	0.478135
ABT1	113.312	102.931	84.187	91.7791	110.545	103.524	94.3745	77.9453		92.9207	-0.0328603	0.871885	0.946132
ABTB1	3.71516	2.05861	14.4321	16.3891	14.419	4.77805	3.62979	8.66059		5.62345	-0.289427	0.63879	0.809257
ABTB2	48.297	26.7619	38.4855	37.695	52.8695	38.2244	45.3723	38.1066		28.8756	0.18531	0.525543	0.734587
AC004556.3	11.1455	6.17583	12.0267	8.19456	19.2253	4.77805	12.7043	8.66059		8.81126	0.219561	0.684867	0.839815
AC004706.3	26.0061	14.4103	19.2428	22.9448	26.4348	23.8902	23.5936	19.0533		15.8913	0.148129	0.705873	0.852616
AC004922.1	1.85758	2.05861	4.81069	0	2.40316	0	3.62979	0		8.52419	-0.509942	0.668501	0.828748
AC007325.2	1.85758	2.05861	12.0267	21.3059	19.2253	12.7415	21.7787	10.3927		9.48549	0.736355	0.210178	0.446554
AC008763.3	3.71516	0	0	0	2.40316	3.18536	7.25957	3.46424		5.83724	2.072	0.0829025	0.254122
AC008878.1	7.43031	2.05861	4.81069	6.55565	12.0158	3.18536	5.44468	8.66059		6.93901	0.405922	0.561483	0.760232
AC008878.3	3.71516	2.05861	2.40534	3.27783	4.80632	3.18536	5.44468	3.46424		5.92715	0.508864	0.532178	0.740484
AC009133.6	1.85758	6.17583	2.40534	3.27783	7.20948	6.37073	3.62979	1.73212		4.46204	0.439389	0.604351	0.788949
AC011005.1	44.5819	45.2894	57.7283	34.4172	64.8853	52.5585	56.2617	39.8387		34.9756	0.23637	0.423791	0.654651
AC011043.1	20.4334	14.4103	21.6481	18.028	21.6284	22.2976	12.7043	19.0533		11.8165	0.0240251	0.953736	0.978247
AC011448.1	59.4425	51.4653	69.755	81.9456	79.3043	39.8171	63.5213	46.7672		112.25	-0.230333	0.369001	0.608495
AC015688.4	1.85758	4.11722	4.81069	1.63891	12.0158	4.77805	10.8894	8.66059		3.29632	1.58564	0.0519135	0.18686
AC015813.2	1.85758	0	2.40534	3.27783	9.61264	4.77805	1.81489	5.19635		3.12199	1.40514	0.134093	0.341658
AC015871.1	3.71516	10.2931	2.40534	6.55565	4.80632	6.37073	1.81489	5.19635		3.19267	-0.344271	0.667562	0.82824
AC017083.3	18.5758	30.8792	26.4588	29.5004	24.0316	17.5195	34.483	17.3212		19.7848	-0.186797	0.602734	0.787987
AC019257.8	5.57274	2.05861	2.40534	4.91674	2.40316	6.37073	1.81489	5.19635		5.37989	0.0841422	0.913556	0.962096
AC020909.1	0	2.05861	2.40534	1.63891	0	4.77805	1.81489	3.46424		2.3503	0.857783	0.480722	0.701272
AC024940.7	13.0031	10.2931	9.62138	29.5004	2.40316	6.37073	1.81489	3.46424		10.4952	-2.1445	0.000820796	0.0101836
AC026786.1	1.85758	10.2931	2.40534	1.63891	0	4.77805	1.81489	1.73212		5.12041	-0.786309	0.374347	0.614159
AC040162.1	5.57274	0	7.21603	3.27783	0	1.59268	3.62979	1.73212		1.6529	-1.12096	0.315613	0.556531
AC055839.2	7.43031	14.4103	2.40534	14.7502	2.40316	3.18536	7.25957	5.19635		6.82429	-1.13661	0.0725081	0.233154
AC068896.1	5.57274	2.05861	0	6.55565	9.61264	6.37073	14.5191	1.73212		4.58244	1.06503	0.180383	0.408971
AC073283.3	20.4334	30.8792	16.8374	26.2226	36.0474	36.6317	21.7787	25.9818		30.502	0.334414	0.370351	0.609838
AC073610.2	3.71516	2.05861	0	1.63891	2.40316	3.18536	1.81489	0		4.92555	-0.0735409	0.94783	0.974906
AC073896.1	0	4.11722	4.81069	4.91674	2.40316	11.1488	1.81489	12.1248		13.7694	1.08647	0.128703	0.333288
AC079447.1	1.85758	8.23444	4.81069	3.27783	9.61264	7.96341	5.44468	8.66059		17.4746	0.829984	0.202834	0.436563
AC091304.7	70.588	86.4616	64.9443	93.418	79.3043	84.4122	74.4106	79.6774		39.6313	0.00189054	0.993307	0.996887
AC091551.1	0	4.11722	2.40534	9.83348	4.80632	4.77805	5.44468	3.46424		13.1804	0.09102	0.903357	0.958642
AC092647.5	0	2.05861	2.40534	1.63891	2.40316	0	1.81489	6.92847		6.95436	0.915067	0.398202	0.633876
AC092835.1	27.8637	16.4689	21.6481	37.695	28.8379	17.5195	23.5936	19.0533		28.2508	-0.281438	0.421198	0.653303
AC093323.1	20.4334	16.4689	14.4321	9.83348	16.8221	12.7415	9.07447	5.19635		13.0207	-0.508077	0.306014	0.547262
AC093668.1	5.57274	2.05861	2.40534	4.91674	4.80632	9.55609	7.25957	1.73212		3.778	0.619212	0.422585	0.654239
AC100868.1	5.57274	6.17583	0	4.91674	31.2411	15.9268	21.7787	31.1781		16.5815	2.50968	6.49975e-05	0.00143902
AC117378.1	117.027	98.8133	132.294	140.946	112.949	71.6707	139.747	88.338		95.5532	-0.256403	0.258743	0.498469
AC118549.1	96.5941	104.989	93.8084	132.752	122.561	108.302	90.7447	98.7307		78.0924	-0.046702	0.80713	0.906448
AC136352.3	13.0031	10.2931	9.62138	6.55565	14.419	17.5195	16.334	10.3927		12.7342	0.586768	0.236119	0.475999
AC138811.2	50.1546	51.4653	50.5122	40.9728	62.4822	63.7073	43.5574	58.892		52.2647	0.248596	0.393529	0.630602
AC253536.7	46.4395	51.4653	57.7283	62.2787	72.0948	46.1878	90.7447	57.1599		48.08	0.279842	0.370408	0.609852
ACAA1	50.1546	37.055	40.8908	37.695	69.6916	65.3	54.4468	53.6956		53.8887	0.544968	0.0409727	0.159302
ACAA2	219.194	203.802	168.374	183.558	218.688	245.273	208.713	242.496		295.555	0.239794	0.15108	0.366056
ACACB	46.4395	55.5825	55.3229	68.8343	45.66	23.8902	32.6681	24.2496		26.7146	-0.881703	0.00300033	0.026255
ACAD10	42.7243	61.7583	91.4031	73.7511	33.6442	36.6317	41.7425	51.9635		46.2535	-0.697916	0.0161061	0.0857351
ACAD11	39.0092	45.2894	26.4588	49.1674	26.4348	22.2976	18.1489	41.5708		32.3323	-0.582283	0.0472359	0.174812
ACAD8	66.8728	63.8169	64.9443	62.2787	98.5296	86.0049	98.0042	74.4811		87.1091	0.461517	0.0231691	0.109642
ACAD9	55.7274	49.4066	60.1336	52.4452	45.66	52.5585	74.4106	38.1066		55.1279	-0.0367023	0.87853	0.948712
ACADM	83.591	86.4616	52.9176	62.2787	60.079	84.4122	47.1872	74.4811		105.812	-0.092645	0.694157	0.84568
ACADS	35.294	24.7033	36.0802	19.667	16.8221	15.9268	32.6681	17.3212		24.0078	-0.461415	0.192666	0.424007
ACADSB	40.8667	37.055	43.2962	59.0009	26.4348	12.7415	19.9638	8.66059		35.2641	-1.48552	7.64246e-06	0.000240019
ACADVL	115.17	102.931	170.779	127.835	134.577	144.934	156.081	142.034		145.623	0.175713	0.309323	0.55043
ACAN	3.71516	2.05861	2.40534	1.63891	4.80632	7.96341	3.62979	5.19635		5.95337	1.17039	0.160151	0.380013
ACAP1	24.1485	20.5861	28.8641	19.667	48.0632	23.8902	50.817	34.6424		31.0012	0.746355	0.0169453	0.0882916
ACAP2	57.5849	51.4653	43.2962	63.9176	69.6916	58.9293	61.7064	77.9453		84.5016	0.290038	0.22665	0.464989
ACAP3	48.297	49.4066	48.1069	39.3339	60.079	65.3	79.8553	55.4278		35.2784	0.504864	0.0423043	0.162474
ACAT1	27.8637	39.1136	40.8908	50.8063	50.4664	49.3732	23.5936	34.6424		83.3234	-0.0268064	0.915649	0.962934
ACAT2	507.119	384.96	322.316	435.951	312.411	350.39	372.053	381.066		528.011	-0.222925	0.199708	0.432143
ACBD3	63.1577	63.8169	40.8908	77.0289	79.3043	58.9293	56.2617	55.4278		87.3075	-0.0149209	0.947847	0.974906
ACBD4	5.57274	10.2931	12.0267	11.4724	4.80632	3.18536	1.81489	1.73212		6.22996	-1.8177	0.0130664	0.074731
ACBD5	20.4334	32.9378	16.8374	24.5837	38.4506	23.8902	27.2234	20.7854		34.7289	0.176319	0.599687	0.786184
ACBD6	61.3001	45.2894	45.7015	54.0841	57.6758	81.2268	67.1511	50.2314		77.4283	0.312364	0.194043	0.426065
ACBD7	3.71516	2.05861	2.40534	6.55565	7.20948	1.59268	0	0		8.45756	-1.05179	0.259789	0.499604
ACCS	5.57274	12.3517	0	11.4724	2.40316	4.77805	3.62979	8.66059		4.32861	-0.608568	0.380113	0.618516
ACD	96.5941	43.2308	69.755	63.9176	76.9011	58.9293	79.8553	46.7672		71.3302	-0.076382	0.761774	0.88297
ACE	9.28789	8.23444	21.6481	3.27783	12.0158	7.96341	18.1489	6.92847		8.64844	0.151511	0.775936	0.890081
ACER2	3.71516	6.17583	16.8374	0	0	1.59268	10.8894	3.46424		6.47094	-0.571399	0.44728	0.672934
ACER3	5.57274	2.05861	7.21603	3.27783	0	4.77805	1.81489	15.5891		9.7156	0.417048	0.554503	0.754859
ACHE	9.28789	8.23444	21.6481	14.7502	21.6284	25.4829	34.483	32.9102		17.8538	1.12617	0.00463486	0.0366432
ACIN1	659.44	621.7	466.637	481.84	581.565	619.553	549.913	620.098		527.523	0.0884922	0.534823	0.74226
ACKR3	1.85758	2.05861	31.2695	11.4724	14.419	1.59268	27.2234	6.92847		10.9176	0.121865	0.891652	0.954411
ACLY	1396.9	1292.81	1349.4	1086.6	999.715	1119.66	1154.27	1034.07		1488.4	-0.24855	0.0455827	0.17071
ACO1	154.179	129.692	151.537	167.169	96.1264	135.378	137.932	107.391		189.524	-0.3294	0.0498625	0.181583
ACO2	308.358	288.205	233.318	276.976	317.217	380.651	435.574	348.156		371.393	0.420336	0.0272375	0.121941
ACOT1	7.43031	4.11722	7.21603	0	0	1.59268	5.44468	5.19635		2.42043	-0.505016	0.579235	0.772581
ACOT11	13.0031	16.4689	7.21603	13.1113	7.20948	9.55609	10.8894	5.19635		10.6156	-0.610697	0.219482	0.457526
ACOT13	29.7213	26.7619	36.0802	45.8896	24.0316	39.8171	34.483	29.446		78.1941	-0.105137	0.704796	0.851996
ACOT2	11.1455	12.3517	9.62138	13.1113	26.4348	20.7049	41.7425	29.446		15.4111	1.3392	0.00118535	0.013491
ACOT4	3.71516	6.17583	0	16.3891	9.61264	0	7.25957	5.19635		4.98691	-0.420268	0.571499	0.767244
ACOT7	248.916	257.326	199.644	198.308	163.415	200.678	188.749	135.105		250.088	-0.390333	0.0111586	0.0670671
ACOT8	74.3031	104.989	76.971	68.8343	67.2885	63.7073	63.5213	50.2314		57.8722	-0.409418	0.0860644	0.25956
ACOT9	65.0153	53.5239	52.9176	68.8343	62.4822	74.8561	81.6702	79.6774		107.537	0.30973	0.141585	0.353075
ACOX1	35.294	28.8205	57.7283	36.0561	43.2569	58.9293	65.3362	46.7672		82.1075	0.476317	0.0769957	0.242229
ACOX2	1.85758	8.23444	9.62138	0	0	3.18536	0	1.73212		3.69493	-1.75105	0.10564	0.294434
ACOX3	16.7182	34.9964	50.5122	32.7783	26.4348	31.8536	27.2234	24.2496		32.3884	-0.261895	0.412757	0.645644
ACOXL	5.57274	22.6447	19.2428	22.9448	24.0316	11.1488	18.1489	22.5175		12.4202	0.0844573	0.841329	0.926595
ACP1	89.1638	94.6961	57.7283	80.3067	100.933	81.2268	63.5213	65.8205		125.856	-0.0688783	0.778181	0.891229
ACP2	37.1516	45.2894	38.4855	39.3339	38.4506	63.7073	41.7425	38.1066		43.5377	0.206732	0.418622	0.650677
ACP5	3.71516	2.05861	7.21603	3.27783	16.8221	14.3341	19.9638	15.5891		9.94956	2.08413	0.000699666	0.00896474
ACP6	37.1516	37.055	45.7015	22.9448	26.4348	20.7049	16.334	15.5891		21.0298	-0.851183	0.0122496	0.0717821
ACSBG1	5.57274	4.11722	2.40534	6.55565	7.20948	7.96341	3.62979	1.73212		4.69705	0.07159	0.921968	0.965017
ACSF2	14.8606	16.4689	19.2428	19.667	9.61264	9.55609	10.8894	6.92847		14.0191	-0.929961	0.0435604	0.166029
ACSF3	29.7213	39.1136	57.7283	44.2506	48.0632	44.5951	92.5596	74.4811		45.7641	0.628166	0.0173892	0.0895621
ACSL1	13.0031	28.8205	12.0267	13.1113	9.61264	22.2976	7.25957	20.7854		20.5539	-0.103522	0.800031	0.902706
ACSL3	204.334	220.271	185.211	219.614	247.526	227.754	181.489	263.282		279.352	0.144744	0.417261	0.64969
ACSL4	239.628	240.857	190.022	240.92	124.964	117.859	108.894	138.569		285.78	-0.900048	8.58411e-07	3.69648e-05
ACSM3	7.43031	4.11722	4.81069	1.63891	2.40316	6.37073	5.44468	3.46424		5.1953	0.0466881	0.950909	0.976416
ACSS2	52.0122	84.403	110.646	90.1402	31.2411	47.7805	72.5957	65.8205		73.4789	-0.599325	0.0138167	0.0776749
ACSS3	63.1577	43.2308	55.3229	70.4732	31.2411	28.6683	29.0383	46.7672		60.1668	-0.781853	0.00685117	0.0481234
ACTA1	13.0031	28.8205	19.2428	14.7502	31.2411	36.6317	36.2979	15.5891		32.5454	0.680374	0.0639293	0.214162
ACTA2	1.85758	2.05861	2.40534	1.63891	2.40316	1.59268	0	0		2.54603	-1.07876	0.411033	0.643837
ACTB	12029.7	10791.2	11954.6	9423.75	11588	10556.3	14330.4	11063		15724.8	0.105205	0.353917	0.593575
ACTC1	22.2909	24.7033	24.0534	11.4724	31.2411	30.261	34.483	38.1066		34.9788	0.740049	0.0193367	0.0962858
ACTG1	9103.99	8226.21	11011.7	8043.78	11386.2	10717.2	13373.9	10545.1		10970.5	0.339233	0.00883921	0.0572129
ACTG2	1.85758	8.23444	4.81069	0	4.80632	4.77805	5.44468	6.92847		6.38971	0.673149	0.371044	0.610658
ACTL10	5.57274	0	0	0	2.40316	3.18536	7.25957	3.46424		1.52727	1.50646	0.215593	0.452984
ACTL6A	126.315	117.341	76.971	126.196	91.3201	116.266	96.1893	83.1416		172.896	-0.216928	0.272017	0.512553
ACTL8	5.57274	4.11722	0	1.63891	0	4.77805	1.81489	1.73212		2.80182	-0.366024	0.714994	0.85787
ACTN1	704.022	514.653	495.501	445.784	550.324	559.032	600.73	609.705		650.126	0.103238	0.529094	0.737658
ACTN2	7.43031	2.05861	7.21603	3.27783	0	3.18536	7.25957	1.73212		2.80925	-0.62481	0.457776	0.682432
ACTN3	42.7243	55.5825	50.5122	63.9176	14.419	4.77805	9.07447	20.7854		28.991	-2.15114	5.65687e-09	4.43039e-07
ACTN4	793.186	761.686	726.414	601.481	781.027	788.378	774.959	698.043		758.002	0.0789983	0.541535	0.747353
ACTR10	48.297	51.4653	36.0802	47.5285	50.4664	44.5951	47.1872	57.1599		75.0565	0.105851	0.652991	0.819176
ACTR1A	163.467	160.572	139.51	157.336	129.771	154.49	156.081	107.391		213.375	-0.181323	0.231221	0.470516
ACTR1B	61.3001	55.5825	103.43	60.6398	91.3201	79.6341	112.523	93.5343		78.3405	0.447037	0.0368313	0.148913
ACTR2	193.188	284.088	214.076	275.337	206.672	262.793	208.713	268.478		462.975	-0.0271017	0.866698	0.94276
ACTR3	105.882	111.165	96.2138	168.808	134.577	154.49	132.487	173.212		254.563	0.292829	0.155791	0.372916
ACTR3B	20.4334	30.8792	16.8374	26.2226	16.8221	15.9268	14.5191	15.5891		23.9836	-0.604819	0.106413	0.295997
ACTR5	52.0122	51.4653	45.7015	54.0841	57.6758	60.5219	52.6319	53.6956		47.5571	0.135891	0.56718	0.763408
ACTR6	27.8637	26.7619	26.4588	36.0561	21.6284	41.4097	21.7787	31.1781		50.7436	0.00236817	0.993764	0.997026
ACTR8	74.3031	57.6411	36.0802	57.3619	74.498	81.2268	54.4468	91.8022		76.9161	0.405425	0.0650425	0.216999
ACTRT3	13.0031	10.2931	4.81069	4.91674	28.8379	27.0756	18.1489	31.1781		15.9176	1.66227	0.000185134	0.00330944
ACVR1	27.8637	30.8792	33.6748	22.9448	26.4348	38.2244	27.2234	29.446		37.4161	0.110526	0.716435	0.858178
ACVR1B	37.1516	72.0514	96.2138	75.39	40.8537	20.7049	34.483	41.5708		51.4229	-1.0353	0.000181115	0.00325151
ACVR2A	14.8606	26.7619	9.62138	18.028	14.419	19.1122	14.5191	22.5175		29.6686	0.0300299	0.93723	0.970774
ACVR2B	202.476	201.744	257.372	219.614	204.269	165.639	199.638	121.248		149.916	-0.356277	0.0441163	0.167268
ACY1	9.28789	8.23444	7.21603	3.27783	4.80632	7.96341	7.25957	8.66059		11.5652	0.0921404	0.878322	0.948712
ACYP1	11.1455	14.4103	2.40534	11.4724	4.80632	0	3.62979	0		13.1938	-2.45704	0.00267653	0.0242349
ADA	37.1516	22.6447	36.0802	26.2226	12.0158	6.37073	9.07447	3.46424		20.4633	-2.03498	4.50803e-06	0.000153924
ADA2	53.8698	72.0514	50.5122	67.1954	60.079	55.7439	67.1511	38.1066		74.0422	-0.158818	0.472933	0.695126
ADAD2	1.85758	0	7.21603	1.63891	7.20948	3.18536	3.62979	3.46424		2.72121	0.761482	0.40566	0.639624
ADAL	5.57274	10.2931	4.81069	6.55565	4.80632	19.1122	3.62979	6.92847		8.15039	0.403945	0.491787	0.709157
ADAM10	169.04	148.22	120.267	206.503	187.446	194.307	159.711	202.658		266.1	0.193355	0.260512	0.500456
ADAM11	11.1455	6.17583	9.62138	4.91674	0	1.59268	5.44468	1.73212		3.64302	-1.78613	0.0422239	0.162253
ADAM15	76.1607	84.403	81.7817	65.5565	50.4664	31.8536	32.6681	50.2314		41.528	-0.908015	0.000730151	0.00927943
ADAM17	68.7304	82.3444	74.5657	88.5013	62.4822	89.1902	74.4106	55.4278		81.6073	-0.15161	0.487425	0.706323
ADAM19	31.5788	20.5861	67.3496	52.4452	96.1264	111.488	139.747	157.623		77.2407	1.57468	1.01294e-09	9.91653e-08
ADAM22	20.4334	30.8792	19.2428	21.3059	12.0158	7.96341	9.07447	15.5891		16.4883	-1.05133	0.0146539	0.0805005
ADAM23	92.8789	72.0514	26.4588	36.0561	12.0158	20.7049	18.1489	12.1248		30.819	-1.83883	9.28437e-07	3.95723e-05
ADAM33	16.7182	8.23444	24.0534	8.19456	2.40316	1.59268	0	0		4.02516	-3.91994	0.000499322	0.00701457
ADAM8	3.71516	0	7.21603	3.27783	4.80632	9.55609	9.07447	6.92847		5.50479	1.17754	0.105074	0.293403
ADAM9	33.4364	39.1136	38.4855	40.9728	57.6758	73.2634	52.6319	48.4993		47.0067	0.615901	0.0138239	0.0776774
ADAMTS1	68.7304	76.1686	52.9176	68.8343	38.4506	62.1146	68.9659	57.1599		63.3547	-0.224045	0.40756	0.6416
ADAMTS10	20.4334	12.3517	24.0534	16.3891	4.80632	6.37073	16.334	6.92847		8.04272	-1.05821	0.0392861	0.155249
ADAMTS12	31.5788	41.1722	26.4588	32.7783	19.2253	20.7049	18.1489	31.1781		20.8377	-0.558066	0.0894467	0.266032
ADAMTS13	9.28789	14.4103	26.4588	13.1113	14.419	3.18536	12.7043	13.8569		7.51062	-0.519701	0.347868	0.589073
ADAMTS14	7.43031	0	16.8374	9.83348	9.61264	6.37073	1.81489	5.19635		4.76262	-0.582367	0.425107	0.655558
ADAMTS15	11.1455	14.4103	9.62138	11.4724	16.8221	11.1488	21.7787	19.0533		13.1458	0.546672	0.213042	0.450115
ADAMTS16	50.1546	39.1136	72.1603	59.0009	163.415	165.639	205.083	188.801		103.436	1.72471	1.33588e-15	5.06923e-13
ADAMTS17	3.71516	10.2931	2.40534	4.91674	0	6.37073	5.44468	0		3.01935	-0.768341	0.380494	0.618685
ADAMTS19	118.885	117.341	141.915	154.058	100.933	81.2268	63.5213	103.927		91.5341	-0.616227	0.00231899	0.0220647
ADAMTS2	16.7182	14.4103	19.2428	21.3059	12.0158	17.5195	16.334	6.92847		11.3879	-0.435585	0.316065	0.556711
ADAMTS20	50.1546	41.1722	48.1069	52.4452	21.6284	15.9268	39.9277	29.446		23.6437	-0.848175	0.00527082	0.0400781
ADAMTS3	1.85758	8.23444	16.8374	13.1113	7.20948	9.55609	5.44468	3.46424		9.62354	-0.609856	0.303259	0.544567
ADAMTS4	22.2909	20.5861	26.4588	11.4724	28.8379	23.8902	27.2234	27.7139		23.7947	0.441096	0.22781	0.465996
ADAMTS5	11.1455	10.2931	9.62138	11.4724	4.80632	9.55609	21.7787	20.7854		8.37589	0.444217	0.386545	0.62412
ADAMTS6	0	4.11722	4.81069	3.27783	0	7.96341	1.81489	5.19635		2.22891	0.432011	0.648019	0.815753
ADAMTS7	429.101	376.726	512.338	396.617	194.656	210.234	297.643	207.854		229.962	-0.90949	1.75472e-05	0.000473887
ADAMTS8	70.588	51.4653	52.9176	45.8896	67.2885	49.3732	47.1872	38.1066		39.6114	-0.148999	0.579912	0.772826
ADAMTS9	20.4334	18.5275	36.0802	27.8615	0	1.59268	5.44468	10.3927		11.4864	-2.48697	5.52206e-05	0.00124679
ADAMTSL1	5.57274	6.17583	9.62138	9.83348	31.2411	23.8902	32.6681	29.446		17.39	1.90293	9.41037e-05	0.00193631
ADAMTSL3	1.85758	6.17583	2.40534	0	0	3.18536	1.81489	5.19635		2.40785	0.127188	0.899861	0.958043
ADAMTSL4	9.28789	14.4103	33.6748	13.1113	7.20948	9.55609	12.7043	10.3927		8.70468	-0.75072	0.12319	0.324295
ADAP1	5.57274	2.05861	2.40534	9.83348	4.80632	11.1488	7.25957	5.19635		4.66815	0.468419	0.488406	0.706886
ADARB1	24.1485	20.5861	33.6748	13.1113	21.6284	25.4829	32.6681	22.5175		17.2786	0.203015	0.597102	0.784372
ADAT1	29.7213	41.1722	40.8908	32.7783	60.079	39.8171	45.3723	29.446		29.9138	0.260309	0.38087	0.619024
ADAT2	3.71516	6.17583	2.40534	11.4724	2.40316	7.96341	3.62979	5.19635		7.62893	-0.319112	0.624241	0.800814
ADAT3	46.4395	41.1722	72.1603	26.2226	38.4506	46.1878	56.2617	34.6424		30.6826	-0.0513313	0.877234	0.948102
ADCK1	20.4334	12.3517	21.6481	24.5837	12.0158	25.4829	27.2234	13.8569		24.4813	0.01402	0.968563	0.984306
ADCK2	37.1516	37.055	31.2695	22.9448	40.8537	44.5951	47.1872	46.7672		26.3956	0.499465	0.0819356	0.252269
ADCK5	16.7182	10.2931	26.4588	16.3891	4.80632	19.1122	19.9638	17.3212		11.6064	-0.112741	0.787517	0.896004
ADCY1	98.4517	61.7583	101.024	67.1954	60.079	63.7073	67.1511	48.4993		37.4052	-0.447169	0.0696225	0.227139
ADCY2	222.909	279.971	180.401	217.975	204.269	229.346	205.083	221.711		146.624	-0.0668632	0.683578	0.839137
ADCY3	120.743	119.399	170.779	124.557	112.949	76.4488	88.9298	103.927		72.701	-0.488605	0.0185351	0.0934606
ADCY5	40.8667	51.4653	67.3496	39.3339	55.2727	71.6707	79.8553	57.1599		41.4425	0.444418	0.0710509	0.230181
ADCY6	33.4364	45.2894	60.1336	60.6398	7.20948	20.7049	25.4085	13.8569		24.1577	-1.52984	8.61331e-05	0.00179522
ADCY7	1.85758	14.4103	14.4321	9.83348	4.80632	15.9268	9.07447	5.19635		6.95706	-0.133244	0.823106	0.916917
ADCY8	3.71516	14.4103	4.81069	8.19456	21.6284	20.7049	12.7043	20.7854		8.47899	1.27608	0.0140613	0.0784865
ADCY9	61.3001	51.4653	45.7015	52.4452	69.6916	46.1878	70.7808	53.6956		36.1785	0.164624	0.505181	0.71953
ADCYAP1R1	13.0031	14.4103	16.8374	11.4724	7.20948	7.96341	3.62979	3.46424		10.0008	-1.31273	0.0162929	0.0862191
ADD1	226.625	259.385	223.697	198.308	341.249	320.129	339.385	289.264		326.851	0.508356	3.45537e-05	0.000850673
ADD2	386.376	438.484	425.746	304.838	624.822	573.366	595.285	547.349		411.536	0.594903	2.35543e-06	8.68115e-05
ADD3	143.034	205.861	156.347	219.614	168.221	146.527	136.117	225.175		202.428	-0.105378	0.601394	0.787057
ADGRA2	27.8637	32.9378	40.8908	29.5004	9.61264	12.7415	19.9638	15.5891		12.8667	-1.14531	0.00316712	0.0274082
ADGRA3	222.909	251.15	240.534	299.921	177.834	202.271	208.713	214.783		138.911	-0.335647	0.0293583	0.128206
ADGRB1	29.7213	39.1136	43.2962	34.4172	14.419	12.7415	23.5936	24.2496		17.3256	-0.948655	0.0130506	0.0746745
ADGRB2	81.7335	65.8755	86.5924	59.0009	100.933	70.078	68.9659	41.5708		39.6377	-0.0703743	0.791984	0.898457
ADGRB3	3.71516	8.23444	7.21603	3.27783	2.40316	0	0	0		2.16274	-3.28129	0.00981234	0.0615312
ADGRE5	1.85758	8.23444	2.40534	4.91674	9.61264	9.55609	10.8894	3.46424		6.05677	0.92145	0.161938	0.382588
ADGRF3	18.5758	26.7619	36.0802	26.2226	16.8221	17.5195	23.5936	13.8569		15.2012	-0.567333	0.169577	0.394096
ADGRG2	16.7182	18.5275	24.0534	36.0561	21.6284	22.2976	18.1489	24.2496		25.1257	-0.162263	0.649339	0.816545
ADGRG5	31.5788	24.7033	31.2695	27.8615	16.8221	17.5195	9.07447	8.66059		11.5442	-1.15809	0.0047467	0.0372589
ADGRG6	7.43031	6.17583	4.81069	0	7.20948	14.3341	12.7043	12.1248		7.38898	1.41162	0.0329404	0.138237
ADGRL1	665.013	615.524	632.605	550.675	552.727	508.066	656.991	512.707		341.45	-0.142966	0.244562	0.484656
ADGRL2	382.661	419.956	339.153	453.979	418.15	519.214	362.979	391.459		304.86	0.0821877	0.574228	0.769341
ADGRL3	63.1577	53.5239	48.1069	49.1674	74.498	82.8195	83.4851	74.4811		56.9625	0.55966	0.0131564	0.0750994
ADGRV1	408.667	428.191	404.098	544.119	579.162	617.961	491.836	614.902		350.299	0.365696	0.0419206	0.161547
ADH5	315.788	335.553	353.586	342.533	293.186	363.132	245.011	294.46		578.156	-0.167558	0.244685	0.484656
ADI1	7.43031	22.6447	7.21603	18.028	19.2253	28.6683	19.9638	22.5175		23.428	0.700404	0.0990135	0.283274
ADIPOR1	128.173	139.985	161.158	134.391	175.431	165.639	232.306	157.623		118.478	0.378807	0.0909461	0.268911
ADIPOR2	63.1577	63.8169	79.3763	80.3067	57.6758	36.6317	72.5957	46.7672		67.7044	-0.439742	0.0575254	0.200125
ADK	46.4395	22.6447	31.2695	27.8615	33.6442	38.2244	29.0383	31.1781		57.2053	0.041358	0.89284	0.955357
ADM	31.5788	14.4103	52.9176	21.3059	14.419	11.1488	25.4085	17.3212		28.5269	-0.78806	0.0670957	0.221432
ADM2	1.85758	4.11722	12.0267	3.27783	0	0	3.62979	1.73212		3.60481	-1.86499	0.0779966	0.244466
ADM5	7.43031	6.17583	2.40534	0	12.0158	1.59268	7.25957	5.19635		2.68996	0.661429	0.450738	0.676751
ADNP	586.995	559.942	514.744	621.148	571.952	640.258	649.732	698.043		454.641	0.164762	0.195463	0.427534
ADNP2	382.661	403.488	380.044	350.727	341.249	356.761	335.755	360.28		273.891	-0.118911	0.373658	0.613269
ADO	169.04	121.458	211.67	104.89	129.771	105.117	134.302	72.7489		93.7395	-0.455462	0.0749658	0.238668
ADORA1	11.1455	2.05861	9.62138	4.91674	9.61264	14.3341	7.25957	17.3212		6.53738	0.843897	0.149825	0.364714
ADORA2A	18.5758	16.4689	21.6481	22.9448	9.61264	17.5195	19.9638	17.3212		12.3005	-0.28082	0.502621	0.71778
ADORA2B	5.57274	12.3517	12.0267	11.4724	2.40316	6.37073	0	1.73212		6.19589	-1.90509	0.0100801	0.0625314
ADPGK	91.0214	80.2858	101.024	78.6678	105.739	50.9658	85.3	84.8738		74.0559	-0.119068	0.579737	0.772775
ADPRH	3.71516	2.05861	4.81069	3.27783	0	4.77805	5.44468	8.66059		5.41584	0.549133	0.473985	0.6959
ADPRHL2	72.4456	74.11	72.1603	52.4452	72.0948	81.2268	99.8191	50.2314		71.5349	0.173835	0.455808	0.68094
ADPRM	16.7182	16.4689	16.8374	18.028	28.8379	11.1488	5.44468	5.19635		12.5189	-0.531917	0.24373	0.483986
ADRA2A	11.1455	10.2931	9.62138	11.4724	4.80632	0	1.81489	8.66059		4.33342	-1.52292	0.0368466	0.148913
ADRA2B	13.0031	20.5861	24.0534	13.1113	4.80632	3.18536	10.8894	3.46424		7.80489	-1.64525	0.0037689	0.0312355
ADRA2C	87.3062	82.3444	122.673	62.2787	50.4664	71.6707	94.3745	58.892		41.5069	-0.338154	0.203248	0.437162
ADRM1	436.531	384.96	389.666	321.227	557.533	520.807	471.872	419.172		447.05	0.361302	0.00959592	0.0604254
ADSL	399.379	333.495	283.831	268.782	370.087	423.654	332.125	341.227		357.453	0.190957	0.226208	0.464386
ADSS	85.4486	127.634	113.051	126.196	139.383	124.229	110.708	154.158		201.169	0.221823	0.240598	0.481619
ADSSL1	7.43031	6.17583	7.21603	13.1113	0	7.96341	7.25957	5.19635		6.7752	-0.675313	0.28872	0.528554
AEBP1	131.888	74.11	139.51	111.446	115.352	76.4488	107.079	98.7307		97.9103	-0.209266	0.310501	0.551743
AEBP2	98.4517	88.5202	98.6191	113.085	67.2885	87.5975	74.4106	93.5343		111.175	-0.296935	0.126592	0.329506
AEN	200.618	183.216	204.454	158.975	221.091	178.38	226.862	147.23		191.858	0.0475215	0.782977	0.893999
AFAP1	42.7243	51.4653	52.9176	36.0561	50.4664	54.1512	72.5957	84.8738		54.2121	0.545046	0.0323511	0.137003
AFAP1L1	13.0031	24.7033	16.8374	11.4724	16.8221	6.37073	10.8894	10.3927		11.4255	-0.599277	0.208623	0.444525
AFAP1L2	7.43031	10.2931	19.2428	6.55565	2.40316	0	1.81489	3.46424		5.74302	-2.49972	0.00326435	0.0280175
AFDN	572.134	627.876	507.528	562.147	636.837	654.593	575.321	678.99		489.974	0.16454	0.142886	0.354659
AFF1	200.618	234.682	187.617	208.142	295.589	273.941	268.604	308.317		246.292	0.459698	0.000179723	0.00324276
AFF2	35.294	39.1136	26.4588	34.4172	24.0316	28.6683	18.1489	24.2496		27.1734	-0.511489	0.106496	0.296096
AFF3	7.43031	4.11722	4.81069	3.27783	2.40316	0	1.81489	0		3.43427	-2.39071	0.0424982	0.163007
AFF4	269.349	242.916	209.265	268.782	353.265	417.283	341.2	413.976		275.305	0.619791	5.48263e-06	0.000180323
AFG1L	7.43031	6.17583	12.0267	18.028	7.20948	11.1488	12.7043	12.1248		12.7886	-0.0188445	0.968142	0.984049
AFG3L2	258.203	294.381	202.049	290.088	377.296	383.836	370.238	334.299		314.05	0.480205	0.000921047	0.0111621
AFMID	11.1455	22.6447	9.62138	6.55565	12.0158	14.3341	21.7787	12.1248		25.0484	0.306636	0.479147	0.69987
AFP	3.71516	0	0	0	2.40316	4.77805	5.44468	1.73212		3.00994	1.89513	0.123694	0.324993
AFTPH	24.1485	49.4066	48.1069	72.1122	48.0632	46.1878	81.6702	55.4278		42.991	0.248674	0.397546	0.633349
AGA	7.43031	4.11722	12.0267	11.4724	14.419	7.96341	3.62979	22.5175		17.1084	0.452791	0.360632	0.600702
AGAP1	118.885	142.044	105.835	113.085	197.059	144.934	152.451	121.248		85.7485	0.346932	0.0831105	0.254208
AGAP2	5.57274	10.2931	7.21603	1.63891	9.61264	3.18536	1.81489	8.66059		5.48857	-0.0890867	0.903384	0.958642
AGAP3	148.606	166.747	163.563	157.336	103.336	74.8561	132.487	98.7307		88.3476	-0.641628	0.000333298	0.00515817
AGAP5	11.1455	6.17583	2.40534	6.55565	7.20948	6.37073	3.62979	3.46424		2.98639	-0.400364	0.599178	0.786127
AGAP6	13.0031	22.6447	2.40534	8.19456	12.0158	4.77805	14.5191	5.19635		5.3144	-0.384067	0.548386	0.751102
AGAP9	11.1455	12.3517	12.0267	18.028	24.0316	14.3341	21.7787	13.8569		8.09394	0.424099	0.361684	0.601414
AGBL4	0	0	0	0	4.80632	6.37073	3.62979	6.92847		2.04357	3.91998	0.00127625	0.0142031
AGBL5	191.331	205.861	252.561	149.141	148.996	121.044	143.377	129.909		98.8465	-0.549829	0.00202176	0.01998
AGFG1	176.47	183.216	134.699	139.308	182.64	200.678	217.787	187.069		201.024	0.317047	0.0285658	0.125864
AGFG2	3.71516	8.23444	12.0267	11.4724	12.0158	15.9268	16.334	1.73212		8.81497	0.387263	0.47186	0.694407
AGGF1	13.0031	18.5275	9.62138	16.3891	9.61264	9.55609	9.07447	15.5891		8.27121	-0.40005	0.417193	0.649664
AGK	3.71516	14.4103	24.0534	22.9448	9.61264	17.5195	10.8894	20.7854		31.5226	-0.0918279	0.813967	0.910916
AGL	94.7365	98.8133	84.187	127.835	117.755	124.229	134.302	148.962		141.174	0.366934	0.140848	0.351826
AGMAT	24.1485	12.3517	7.21603	11.4724	9.61264	11.1488	7.25957	1.73212		12.5406	-0.928731	0.0830616	0.254208
AGO1	176.47	148.22	194.833	217.975	310.008	254.829	335.755	284.067		191.871	0.676585	2.78098e-05	0.00070259
AGO2	239.628	201.744	240.534	208.142	242.719	238.902	272.234	221.711		204.721	0.135059	0.297878	0.538552
AGO3	26.0061	28.8205	16.8374	37.695	26.4348	46.1878	27.2234	31.1781		28.021	0.250485	0.435169	0.663072
AGO4	18.5758	43.2308	33.6748	40.9728	26.4348	20.7049	19.9638	15.5891		18.0862	-0.743948	0.0341574	0.141966
AGPAT2	59.4425	51.4653	69.755	32.7783	31.2411	47.7805	49.0021	36.3745		38.5906	-0.339158	0.242429	0.48306
AGPAT3	5.57274	12.3517	24.0534	21.3059	9.61264	4.77805	9.07447	8.66059		9.43038	-0.991567	0.0594414	0.204211
AGPAT4	33.4364	34.9964	62.5389	39.3339	24.0316	47.7805	39.9277	36.3745		49.6866	-0.149491	0.607807	0.790579
AGPAT5	156.037	154.396	117.862	124.557	173.028	218.198	177.86	173.212		140.896	0.428539	0.00870813	0.056569
AGPS	118.885	88.5202	60.1336	103.251	84.1106	109.895	94.3745	93.5343		134.994	0.0324247	0.878001	0.948712
AGRN	724.456	699.927	1063.16	622.787	627.225	519.214	802.183	443.422		498.021	-0.377477	0.0719511	0.232077
AGTPBP1	156.037	183.216	163.563	158.975	129.771	172.01	166.97	173.212		144.677	-0.0316002	0.851452	0.932451
AGTRAP	70.588	59.6997	84.187	54.0841	57.6758	76.4488	59.8915	64.0884		75.7776	-0.0297051	0.896526	0.95706
AHCTF1	325.076	349.964	250.156	340.894	362.877	348.797	313.977	427.833		290.995	0.194027	0.198059	0.430359
AHCY	811.762	734.924	743.251	729.316	925.217	724.671	911.076	748.275		984.747	0.130035	0.383568	0.621315
AHCYL1	167.182	160.572	165.969	162.252	225.897	183.158	174.23	176.676		266.653	0.20058	0.150101	0.364816
AHCYL2	26.0061	22.6447	40.8908	34.4172	48.0632	39.8171	39.9277	45.0351		50.1314	0.480791	0.115394	0.310835
AHDC1	217.337	152.337	247.75	167.169	127.367	122.637	177.86	145.498		118.33	-0.446562	0.0581897	0.201541
AHI1	22.2909	28.8205	26.4588	32.7783	36.0474	20.7049	23.5936	31.1781		20.2506	-0.0177111	0.957201	0.979158
AHNAK2	35.294	34.9964	67.3496	60.6398	31.2411	38.2244	27.2234	27.7139		25.7031	-0.662189	0.040077	0.156939
AHRR	3.71516	4.11722	0	6.55565	0	6.37073	7.25957	5.19635		2.68694	0.375449	0.6568	0.821476
AHSA1	135.603	148.22	113.051	144.224	204.269	203.863	154.266	225.175		273.212	0.534157	0.00118019	0.0134568
AIDA	89.1638	82.3444	45.7015	96.6958	93.7232	101.932	74.4106	112.588		79.1795	0.26993	0.284997	0.524884
AIF1L	74.3031	72.0514	50.5122	73.7511	26.4348	49.3732	32.6681	45.0351		85.8403	-0.801479	0.00248405	0.0230064
AIFM1	191.331	224.389	218.886	214.698	307.605	238.902	206.898	252.889		320.377	0.238849	0.155156	0.371894
AIFM2	13.0031	16.4689	9.62138	14.7502	12.0158	20.7049	14.5191	17.3212		15.9184	0.273195	0.52216	0.732773
AIG1	24.1485	37.055	31.2695	26.2226	43.2569	28.6683	34.483	43.3029		49.5609	0.33325	0.253866	0.49375
AIMP1	70.588	74.11	62.5389	60.6398	91.3201	70.078	74.4106	119.516		116.664	0.405408	0.0654871	0.217786
AIMP2	196.903	203.802	175.59	121.28	209.075	246.866	183.304	188.801		231.774	0.258084	0.118328	0.315549
AIP	52.0122	51.4653	50.5122	59.0009	36.0474	41.4097	45.3723	27.7139		56.5039	-0.504218	0.0564422	0.197729
AJAP1	24.1485	43.2308	36.0802	39.3339	28.8379	28.6683	50.817	55.4278		21.2327	0.210692	0.502881	0.71778
AJM1	11.1455	4.11722	28.8641	22.9448	9.61264	9.55609	25.4085	15.5891		8.09255	-0.138037	0.800447	0.902706
AJUBA	91.0214	69.9927	117.862	62.2787	38.4506	44.5951	63.5213	29.446		47.3221	-0.933751	0.000410174	0.00600809
AK1	20.4334	18.5275	16.8374	8.19456	9.61264	27.0756	12.7043	12.1248		25.2782	0.0161532	0.96921	0.984771
AK2	104.024	98.8133	93.8084	81.9456	139.383	117.859	123.413	150.694		180.43	0.489165	0.00301754	0.0263688
AK3	40.8667	45.2894	36.0802	47.5285	31.2411	47.7805	45.3723	57.1599		57.0245	0.107949	0.699987	0.849873
AK4	163.467	185.275	173.185	163.891	182.64	207.049	210.528	180.14		276.344	0.191146	0.281797	0.5221
AK5	3.71516	6.17583	0	0	0	0	0	0		2.73652	-2.84046	0.0291847	0.127872
AK6	11.1455	16.4689	4.81069	11.4724	12.0158	19.1122	9.07447	13.8569		25.776	0.296338	0.557642	0.756912
AK7	3.71516	8.23444	7.21603	6.55565	2.40316	0	1.81489	1.73212		6.71743	-2.1958	0.0258103	0.117568
AKAP1	297.213	296.44	218.886	209.781	249.929	273.941	292.198	287.532		236.842	0.113596	0.453256	0.678819
AKAP10	35.294	41.1722	26.4588	45.8896	26.4348	63.7073	41.7425	43.3029		33.6122	0.249726	0.369455	0.608987
AKAP11	183.9	240.857	185.211	250.754	141.786	187.937	181.489	230.372		152.618	-0.211546	0.320093	0.560881
AKAP12	780.183	796.682	550.824	675.232	737.77	844.122	667.881	904.165		724.875	0.169737	0.248885	0.489261
AKAP13	254.488	238.799	190.022	224.531	237.913	230.939	272.234	280.603		214.345	0.167251	0.288476	0.528185
AKAP5	11.1455	2.05861	7.21603	1.63891	12.0158	6.37073	9.07447	8.66059		6.21914	0.709169	0.255876	0.495754
AKAP6	1.85758	4.11722	9.62138	8.19456	2.40316	0	1.81489	0		2.18634	-2.65391	0.0285101	0.125748
AKAP7	7.43031	10.2931	4.81069	9.83348	4.80632	7.96341	10.8894	6.92847		10.5067	-0.0823482	0.883519	0.95106
AKAP8	105.882	74.11	81.7817	88.5013	144.19	122.637	121.598	114.32		99.6582	0.505346	0.00703495	0.0490022
AKAP8L	128.173	164.689	259.777	163.891	108.142	113.08	177.86	140.302		152.008	-0.391699	0.0501962	0.182322
AKAP9	156.037	195.568	158.753	190.114	144.19	167.232	112.523	207.854		124.133	-0.147021	0.550596	0.752238
AKIP1	22.2909	28.8205	28.8641	27.8615	24.0316	28.6683	27.2234	22.5175		36.9297	-0.0624553	0.851296	0.932401
AKIRIN1	237.77	247.033	187.617	196.67	281.17	246.866	203.268	207.854		251.43	0.106645	0.599616	0.786184
AKIRIN2	78.0183	69.9927	79.3763	68.8343	105.739	84.4122	74.4106	67.5526		105.671	0.150836	0.431048	0.660244
AKNA	113.312	142.044	115.457	108.168	72.0948	57.3366	96.1893	84.8738		67.2991	-0.623753	0.00152206	0.0162047
AKR1A1	276.779	255.268	312.695	262.226	221.091	238.902	248.64	225.175		300.019	-0.241068	0.179431	0.408334
AKR1B1	245.2	189.392	151.537	162.252	132.174	152.898	148.821	131.641		264.826	-0.404636	0.012209	0.0716646
AKR1C3	7.43031	2.05861	0	0	2.40316	4.77805	0	1.73212		3.23995	-0.0916026	0.931022	0.968342
AKR7A2	146.749	148.22	156.347	132.752	110.545	87.5975	108.894	83.1416		110.634	-0.586941	0.00587477	0.043355
AKT1	156.037	142.044	151.537	122.918	115.352	135.378	136.117	109.123		85.7712	-0.196983	0.261262	0.500993
AKT1S1	57.5849	47.348	64.9443	29.5004	96.1264	65.3	98.0042	69.2847		64.3497	0.732985	0.00744767	0.0509148
AKT2	187.615	189.392	235.724	177.003	180.237	167.232	203.268	188.801		123.618	-0.0874246	0.605469	0.789339
AKT3	0	0	0	3.27783	0	0	0	0		2.14102	-1.4829	0.364599	0.604257
AKTIP	11.1455	16.4689	12.0267	6.55565	14.419	15.9268	18.1489	17.3212		15.9599	0.553734	0.194594	0.426602
AL022312.1	14.8606	6.17583	19.2428	9.83348	26.4348	11.1488	7.25957	12.1248		17.0691	0.146654	0.754274	0.880139
AL024498.2	9.28789	16.4689	7.21603	1.63891	2.40316	6.37073	21.7787	3.46424		16.615	0.00579225	0.994867	0.997414
AL031681.2	9.28789	14.4103	12.0267	14.7502	4.80632	7.96341	9.07447	1.73212		5.56527	-1.08558	0.0693981	0.226643
AL031777.3	0	0	0	0	2.40316	0	3.62979	1.73212		135.671	2.35375	0.0698997	0.227806
AL034430.1	5.57274	12.3517	4.81069	11.4724	16.8221	20.7049	12.7043	17.3212		11.4046	0.960058	0.0605357	0.206414
AL034430.2	24.1485	30.8792	9.62138	27.8615	26.4348	43.0024	25.4085	45.0351		52.9941	0.58577	0.0918248	0.270552
AL109827.1	9.28789	8.23444	12.0267	6.55565	2.40316	7.96341	12.7043	10.3927		15.2322	-0.0308269	0.956056	0.978866
AL135905.2	9.28789	2.05861	9.62138	9.83348	12.0158	19.1122	16.334	12.1248		40.1826	0.957914	0.0462994	0.172672
AL136454.1	521.98	566.118	464.231	581.814	730.561	702.373	695.104	691.115		560.79	0.398866	0.0102412	0.0630937
AL139300.1	7.43031	2.05861	9.62138	6.55565	2.40316	4.77805	5.44468	3.46424		3.43432	-0.626619	0.393661	0.630662
AL162231.1	3.71516	2.05861	7.21603	0	7.20948	1.59268	7.25957	5.19635		6.11231	0.782257	0.34877	0.58992
AL358113.1	83.591	49.4066	60.1336	42.6117	79.3043	68.4853	65.3362	60.6241		70.3471	0.211267	0.382873	0.620831
AL359736.1	46.4395	45.2894	64.9443	27.8615	43.2569	28.6683	50.817	31.1781		28.9226	-0.248032	0.40769	0.641724
AL513165.2	7.43031	0	2.40534	4.91674	9.61264	0	7.25957	3.46424		4.4233	0.303425	0.708242	0.85369
AL513523.9	22.2909	20.5861	28.8641	21.3059	26.4348	27.0756	32.6681	29.446		15.8757	0.331653	0.336306	0.577848
AL603832.3	0	6.17583	2.40534	1.63891	4.80632	0	5.44468	0		3.95048	-0.0651239	0.949542	0.975704
AL713999.1	5.57274	10.2931	0	6.55565	12.0158	20.7049	7.25957	12.1248		11.3561	1.18644	0.0505743	0.183535
ALAD	16.7182	16.4689	26.4588	16.3891	19.2253	11.1488	16.334	12.1248		17.5236	-0.377187	0.338839	0.579781
ALAS1	102.167	80.2858	76.971	106.529	136.98	114.673	154.266	128.177		139.258	0.521223	0.00190815	0.0190501
ALCAM	35.294	49.4066	26.4588	47.5285	12.0158	15.9268	9.07447	19.0533		35.9688	-1.49876	1.62625e-05	0.000446831
ALDH16A1	172.755	144.103	216.481	158.975	153.802	138.563	150.636	124.712		157.331	-0.283118	0.117284	0.313766
ALDH18A1	310.216	212.037	286.236	303.199	271.557	256.422	232.306	258.086		282.637	-0.129873	0.494213	0.711264
ALDH1A3	11.1455	20.5861	19.2428	18.028	12.0158	4.77805	12.7043	1.73212		15.7208	-1.20193	0.0167371	0.087681
ALDH1B1	219.194	177.04	151.537	199.947	225.897	203.863	183.304	183.604		219.462	0.0734127	0.611922	0.793295
ALDH1L2	13.0031	4.11722	7.21603	21.3059	14.419	9.55609	1.81489	13.8569		9.93949	-0.28807	0.593319	0.781767
ALDH2	53.8698	39.1136	62.5389	45.8896	21.6284	17.5195	12.7043	15.5891		44.487	-1.58857	6.24295e-07	2.81511e-05
ALDH3A2	128.173	96.7547	127.483	178.641	88.9169	125.822	78.0404	126.445		143.403	-0.340174	0.0916839	0.270391
ALDH4A1	83.591	92.6375	69.755	86.8624	117.755	73.2634	79.8553	62.3562		85.8607	-0.0318061	0.882514	0.950884
ALDH5A1	26.0061	10.2931	21.6481	13.1113	9.61264	14.3341	14.5191	24.2496		14.6687	-0.140213	0.736871	0.870286
ALDH6A1	48.297	57.6411	81.7817	42.6117	26.4348	28.6683	27.2234	31.1781		74.2296	-0.981104	0.000243006	0.00406015
ALDH7A1	196.903	197.627	194.833	191.753	151.399	103.524	101.634	117.784		283.966	-0.740331	1.06107e-06	4.4321e-05
ALDH9A1	183.9	172.923	190.022	168.808	124.964	125.822	196.008	109.123		198.482	-0.360631	0.0404519	0.158111
ALDOC	118.885	113.224	168.374	111.446	127.367	135.378	137.932	117.784		180.952	0.0340472	0.85273	0.933155
ALG1	81.7335	92.6375	84.187	70.4732	93.7232	111.488	87.1149	62.3562		85.0058	0.1161	0.585903	0.777173
ALG10	14.8606	20.5861	28.8641	18.028	9.61264	9.55609	12.7043	3.46424		19.1721	-1.20627	0.0120357	0.071055
ALG10B	3.71516	2.05861	9.62138	9.83348	9.61264	7.96341	7.25957	5.19635		8.9442	0.226124	0.715714	0.8581
ALG11	33.4364	47.348	33.6748	50.8063	43.2569	70.078	45.3723	67.5526		54.2726	0.459649	0.0840639	0.255433
ALG12	68.7304	57.6411	117.862	47.5285	64.8853	30.261	43.5574	53.6956		56.3519	-0.598696	0.0264032	0.11953
ALG13	130.031	137.927	151.537	139.308	124.964	162.454	150.636	143.766		157.745	0.0701824	0.692098	0.844219
ALG14	11.1455	2.05861	7.21603	6.55565	4.80632	7.96341	9.07447	10.3927		7.57871	0.273639	0.649485	0.816646
ALG1L	5.57274	0	2.40534	8.19456	7.20948	11.1488	1.81489	3.46424		5.80289	0.463669	0.518554	0.730651
ALG2	85.4486	72.0514	69.755	73.7511	100.933	81.2268	127.043	107.391		78.2504	0.460879	0.021587	0.104366
ALG3	139.318	102.931	134.699	109.807	67.2885	89.1902	150.636	98.7307		107.945	-0.248207	0.260982	0.500898
ALG5	26.0061	24.7033	31.2695	24.5837	48.0632	39.8171	39.9277	43.3029		48.8105	0.68597	0.0191805	0.0956812
ALG6	48.297	43.2308	43.2962	55.723	55.2727	14.3341	34.483	27.7139		62.7479	-0.605113	0.039858	0.156718
ALG8	83.591	88.5202	117.862	121.28	93.7232	106.71	87.1149	103.927		139.573	-0.0655242	0.721657	0.860952
ALKBH1	53.8698	28.8205	24.0534	34.4172	26.4348	33.4463	30.8532	43.3029		38.9772	-0.0801503	0.795148	0.899684
ALKBH2	14.8606	34.9964	21.6481	22.9448	36.0474	15.9268	29.0383	24.2496		23.993	0.128182	0.717771	0.858655
ALKBH3	9.28789	14.4103	2.40534	11.4724	19.2253	19.1122	12.7043	22.5175		12.6157	0.931097	0.0685903	0.225079
ALKBH4	37.1516	28.8205	60.1336	29.5004	45.66	30.261	52.6319	29.446		38.4236	0.0322265	0.925182	0.966597
ALKBH5	182.043	199.685	228.508	173.725	281.17	258.015	379.313	230.372		151.69	0.55709	0.0013386	0.01474
ALKBH6	40.8667	34.9964	31.2695	21.3059	38.4506	27.0756	30.8532	19.0533		29.9731	-0.169085	0.619173	0.797888
ALKBH7	167.182	137.927	182.806	181.919	218.688	167.232	248.64	178.408		147.688	0.273995	0.152654	0.368336
ALKBH8	18.5758	16.4689	16.8374	31.1393	24.0316	11.1488	12.7043	32.9102		19.4781	-0.0885984	0.819712	0.914757
ALMS1	577.707	652.579	505.122	586.731	480.632	531.956	435.574	597.581		357.571	-0.182177	0.167397	0.39059
ALOX12	7.43031	6.17583	7.21603	3.27783	0	4.77805	10.8894	1.73212		3.96086	-0.38432	0.617089	0.796779
ALOX12B	5.57274	2.05861	2.40534	3.27783	0	0	5.44468	3.46424		1.99002	-0.564476	0.581823	0.774267
ALPK3	219.194	133.81	113.051	114.724	161.012	144.934	203.268	159.355		113.92	0.197589	0.344196	0.585227
ALPL	482.97	454.953	464.231	358.922	266.751	203.863	223.232	187.069		328.254	-1.00625	1.65702e-11	2.69665e-09
ALS2	174.612	123.517	129.889	145.863	156.205	132.193	123.413	122.98		111.549	-0.1192	0.473679	0.695696
ALS2CL	11.1455	14.4103	16.8374	13.1113	4.80632	12.7415	10.8894	6.92847		8.20466	-0.593554	0.256734	0.496317
ALX1	3.71516	4.11722	4.81069	6.55565	0	0	0	0		3.07527	-3.82442	0.00131266	0.01453
ALX3	3.71516	2.05861	9.62138	1.63891	7.20948	6.37073	1.81489	5.19635		2.39062	0.335607	0.703008	0.850917
ALYREF	328.791	339.671	353.586	327.783	471.019	434.802	392.017	401.851		560.951	0.33142	0.0133343	0.0758131
AMACR	7.43031	16.4689	16.8374	11.4724	7.20948	9.55609	14.5191	15.5891		12.5348	-0.0997637	0.830011	0.92109
AMBRA1	161.609	119.399	141.915	116.363	153.802	151.305	156.081	152.426		129.986	0.188935	0.294462	0.534614
AMD1	276.779	253.209	129.889	234.365	326.83	299.424	303.087	270.21		193.514	0.414276	0.046794	0.173947
AMDHD2	35.294	34.9964	31.2695	13.1113	16.8221	25.4829	39.9277	20.7854		28.0757	-0.121722	0.762252	0.883197
AMER1	87.3062	82.3444	93.8084	81.9456	69.6916	78.0414	78.0404	58.892		61.9589	-0.27201	0.195676	0.427627
AMFR	74.3031	98.8133	125.078	90.1402	91.3201	93.9683	123.413	100.463		93.0039	0.0930478	0.65702	0.821587
AMH	29.7213	45.2894	43.2962	21.3059	38.4506	22.2976	65.3362	20.7854		18.7998	0.0804452	0.85179	0.932526
AMIGO1	9.28789	2.05861	4.81069	6.55565	2.40316	9.55609	9.07447	3.46424		4.5188	0.13038	0.848141	0.929835
AMIGO2	31.5788	22.6447	60.1336	55.723	26.4348	30.261	38.1128	38.1066		30.9106	-0.342436	0.294074	0.534308
AMIGO3	42.7243	28.8205	55.3229	39.3339	79.3043	55.7439	65.3362	46.7672		39.941	0.56554	0.0255251	0.116693
AMMECR1	74.3031	57.6411	67.3496	55.723	62.4822	58.9293	92.5596	67.5526		75.0785	0.148435	0.522165	0.732773
AMMECR1L	24.1485	26.7619	16.8374	24.5837	33.6442	28.6683	27.2234	36.3745		29.4687	0.424855	0.175312	0.401982
AMN1	5.57274	10.2931	9.62138	19.667	7.20948	9.55609	1.81489	3.46424		10.9383	-1.06607	0.077803	0.244104
AMOT	16.7182	12.3517	16.8374	18.028	7.20948	4.77805	9.07447	5.19635		13.1014	-1.31199	0.0125971	0.0730131
AMOTL1	135.603	146.161	125.078	101.613	129.771	119.451	116.153	117.784		123.34	-0.070814	0.67537	0.833296
AMOTL2	118.885	104.989	173.185	144.224	79.3043	84.4122	125.228	109.123		117.256	-0.432393	0.0511696	0.184945
AMPD2	94.7365	90.5789	67.3496	78.6678	64.8853	90.7829	90.7447	74.4811		72.2015	-0.0384305	0.844408	0.928423
AMPD3	16.7182	8.23444	19.2428	11.4724	7.20948	4.77805	3.62979	8.66059		7.81579	-1.19542	0.0310294	0.133161
AMPH	14.8606	4.11722	4.81069	4.91674	0	3.18536	3.62979	5.19635		6.55621	-1.18953	0.108239	0.298571
AMT	11.1455	14.4103	12.0267	9.83348	12.0158	7.96341	23.5936	17.3212		17.8962	0.373097	0.432634	0.661757
AMZ2	70.588	119.399	110.646	96.6958	112.949	103.524	105.264	112.588		81.8314	0.136493	0.463681	0.688028
ANAPC1	484.828	504.36	464.231	439.229	495.051	509.658	531.764	453.815		390.463	0.0738921	0.511558	0.72548
ANAPC10	9.28789	8.23444	7.21603	11.4724	16.8221	12.7415	9.07447	6.92847		14.2227	0.269852	0.594203	0.782303
ANAPC11	176.47	107.048	151.537	86.8624	134.577	101.932	139.747	107.391		202.465	-0.109147	0.6123	0.793703
ANAPC13	9.28789	10.2931	7.21603	22.9448	4.80632	12.7415	9.07447	12.1248		32.1266	-0.36901	0.451887	0.677507
ANAPC15	29.7213	34.9964	12.0267	14.7502	24.0316	19.1122	18.1489	25.9818		28.5396	-0.08015	0.835838	0.923902
ANAPC16	50.1546	49.4066	67.3496	42.6117	48.0632	58.9293	49.0021	39.8387		61.9616	-0.0712271	0.774938	0.889389
ANAPC2	130.031	107.048	129.889	96.6958	110.545	101.932	119.783	110.856		88.0626	-0.0587919	0.746769	0.875757
ANAPC4	55.7274	57.6411	33.6748	62.2787	48.0632	78.0414	45.3723	84.8738		62.6142	0.2914	0.273563	0.513637
ANAPC5	410.525	459.07	442.583	322.866	410.94	469.841	408.351	379.334		319.161	0.034125	0.836017	0.923902
ANAPC7	208.049	253.209	134.699	185.197	175.431	222.976	179.674	228.64		217.403	0.0474824	0.789138	0.897015
ANG	1.85758	4.11722	2.40534	1.63891	0	0	3.62979	3.46424		4.68979	-0.413703	0.687282	0.840986
ANGEL1	96.5941	88.5202	86.5924	57.3619	62.4822	44.5951	56.2617	25.9818		55.4932	-0.813488	0.000585807	0.00793595
ANGEL2	48.297	53.5239	40.8908	57.3619	81.7074	92.3756	105.264	83.1416		74.4869	0.848827	0.000295385	0.00475156
ANGPT1	1.85758	4.11722	2.40534	0	9.61264	6.37073	7.25957	5.19635		6.50493	1.82314	0.0364548	0.148172
ANGPTL2	29.7213	28.8205	16.8374	19.667	16.8221	14.3341	14.5191	5.19635		18.9739	-0.934585	0.0241554	0.112772
ANGPTL4	9.28789	0	4.81069	1.63891	0	4.77805	3.62979	1.73212		3.58531	-0.53623	0.575491	0.77021
ANGPTL6	5.57274	0	7.21603	1.63891	2.40316	7.96341	1.81489	0		2.03154	-0.155263	0.881645	0.950765
ANK1	39.0092	26.7619	43.2962	21.3059	14.419	14.3341	12.7043	22.5175		19.1594	-0.995434	0.00703966	0.0490078
ANK2	250.773	199.685	168.374	231.087	197.059	313.758	215.972	277.139		148.511	0.241562	0.182929	0.412207
ANK3	144.891	137.927	151.537	163.891	91.3201	125.822	68.9659	98.7307		113.132	-0.628714	0.000910391	0.0110544
ANKDD1A	1.85758	6.17583	7.21603	4.91674	2.40316	1.59268	3.62979	6.92847		4.03138	-0.41999	0.596892	0.784274
ANKEF1	22.2909	22.6447	12.0267	22.9448	14.419	19.1122	9.07447	25.9818		21.9901	-0.225706	0.552053	0.753477
ANKFY1	163.467	119.399	153.942	139.308	122.561	144.934	150.636	148.962		133.393	-0.0144666	0.931569	0.968433
ANKH	16.7182	16.4689	12.0267	19.667	7.20948	17.5195	18.1489	15.5891		11.6738	-0.131519	0.756213	0.881252
ANKIB1	135.603	102.931	117.862	137.669	132.174	133.785	134.302	150.694		88.9191	0.150971	0.377578	0.616874
ANKLE1	57.5849	22.6447	36.0802	24.5837	36.0474	43.0024	52.6319	29.446		29.9712	0.20026	0.512053	0.725771
ANKLE2	269.349	205.861	245.345	227.809	281.17	258.015	245.011	254.621		191.397	0.127924	0.364987	0.60442
ANKMY1	5.57274	14.4103	7.21603	3.27783	2.40316	1.59268	5.44468	6.92847		3.59645	-0.855348	0.286948	0.526535
ANKMY2	24.1485	12.3517	19.2428	18.028	2.40316	6.37073	12.7043	17.3212		23.9487	-0.878625	0.0459644	0.171747
ANKRA2	9.28789	26.7619	9.62138	9.83348	21.6284	9.55609	9.07447	6.92847		12.6822	-0.289104	0.552711	0.75414
ANKRD1	0	0	4.81069	3.27783	0	0	0	0		3.95213	-2.51628	0.0625313	0.211207
ANKRD10	178.328	172.923	161.158	126.196	170.624	127.415	165.155	145.498		124.653	-0.0712807	0.749931	0.877623
ANKRD11	102.167	123.517	103.43	109.807	141.786	129.007	141.562	98.7307		73.4886	0.212554	0.254908	0.494849
ANKRD12	156.037	191.451	168.374	281.893	163.415	207.049	114.338	261.55		110.088	-0.0972931	0.718932	0.859192
ANKRD13A	35.294	32.9378	33.6748	47.5285	31.2411	35.039	23.5936	41.5708		35.7047	-0.193169	0.517723	0.729681
ANKRD13B	44.5819	22.6447	19.2428	36.0561	21.6284	20.7049	19.9638	24.2496		20.9976	-0.533446	0.118594	0.316058
ANKRD13C	40.8667	39.1136	45.7015	57.3619	72.0948	78.0414	74.4106	72.7489		42.4416	0.691531	0.0057096	0.0424359
ANKRD13D	37.1516	24.7033	33.6748	37.695	33.6442	28.6683	39.9277	39.8387		20.9512	0.0821965	0.786221	0.895421
ANKRD16	37.1516	22.6447	55.3229	34.4172	36.0474	17.5195	16.334	24.2496		20.8624	-0.689489	0.053376	0.190549
ANKRD17	462.537	529.063	413.719	458.896	463.81	501.695	435.574	510.975		461.373	0.0368457	0.766899	0.885553
ANKRD18A	9.28789	14.4103	12.0267	18.028	16.8221	36.6317	10.8894	24.2496		10.1329	0.732692	0.122347	0.323116
ANKRD18B	24.1485	26.7619	14.4321	37.695	9.61264	14.3341	10.8894	15.5891		10.2442	-1.03865	0.0181047	0.0920664
ANKRD23	3.71516	8.23444	2.40534	3.27783	0	3.18536	5.44468	5.19635		2.19129	-0.28592	0.750659	0.877882
ANKRD24	11.1455	24.7033	28.8641	8.19456	16.8221	19.1122	14.5191	6.92847		12.1904	-0.296589	0.515969	0.728356
ANKRD26	37.1516	39.1136	50.5122	47.5285	36.0474	41.4097	34.483	69.2847		32.2226	0.0709553	0.819904	0.914803
ANKRD27	167.182	148.22	165.969	144.224	72.0948	87.5975	87.1149	72.7489		86.7847	-0.957323	7.06575e-08	4.34075e-06
ANKRD28	100.309	123.517	96.2138	134.391	161.012	146.527	105.264	136.837		122.151	0.258533	0.162519	0.383527
ANKRD33B	14.8606	18.5275	21.6481	9.83348	14.419	30.261	23.5936	10.3927		12.733	0.334554	0.452134	0.677714
ANKRD35	16.7182	20.5861	31.2695	19.667	31.2411	47.7805	18.1489	22.5175		27.693	0.477032	0.188042	0.418578
ANKRD36	3.71516	4.11722	2.40534	4.91674	12.0158	11.1488	9.07447	12.1248		4.20678	1.51132	0.0290139	0.12729
ANKRD36B	1.85758	2.05861	9.62138	1.63891	9.61264	7.96341	1.81489	6.92847		2.98959	0.885721	0.276096	0.516047
ANKRD36C	5.57274	8.23444	0	9.83348	2.40316	9.55609	7.25957	8.66059		3.56823	0.221799	0.759726	0.882228
ANKRD37	1.85758	0	0	3.27783	4.80632	7.96341	7.25957	3.46424		3.83921	2.04531	0.0493104	0.179991
ANKRD39	14.8606	26.7619	28.8641	18.028	16.8221	19.1122	12.7043	17.3212		23.6427	-0.399711	0.382643	0.620619
ANKRD40	79.8759	78.2272	60.1336	101.613	103.336	84.4122	90.7447	100.463		76.09	0.221343	0.320164	0.560881
ANKRD42	3.71516	0	2.40534	1.63891	2.40316	6.37073	5.44468	0		3.85558	0.906118	0.352073	0.591794
ANKRD46	27.8637	32.9378	43.2962	29.5004	31.2411	39.8171	36.2979	36.3745		51.7768	0.14416	0.596544	0.783902
ANKRD49	24.1485	18.5275	19.2428	13.1113	14.419	19.1122	18.1489	24.2496		15.6075	0.048096	0.90109	0.958536
ANKRD50	124.458	144.103	101.024	150.78	129.771	133.785	101.634	121.248		92.857	-0.108703	0.566947	0.763288
ANKRD52	117.027	84.403	141.915	72.1122	76.9011	82.8195	98.0042	86.6059		74.4658	-0.250287	0.267144	0.50762
ANKRD54	22.2909	16.4689	9.62138	11.4724	14.419	20.7049	32.6681	20.7854		15.6894	0.57085	0.173999	0.400291
ANKRD6	16.7182	12.3517	26.4588	22.9448	14.419	19.1122	19.9638	10.3927		11.2076	-0.282482	0.513484	0.726894
ANKRD9	167.182	150.279	254.966	158.975	108.142	108.302	163.34	74.4811		75.9558	-0.680745	0.00649312	0.046708
ANKS1A	191.331	127.634	197.238	126.196	206.672	144.934	143.377	128.177		139.506	-0.0496675	0.794294	0.899657
ANKS1B	5.57274	4.11722	0	6.55565	2.40316	0	0	0		2.61901	-2.92511	0.0169268	0.0882916
ANKS3	31.5788	30.8792	26.4588	24.5837	45.66	50.9658	49.0021	43.3029		26.4125	0.740952	0.0113612	0.0679555
ANKS6	169.04	135.868	158.753	109.807	79.3043	60.5219	70.7808	81.4095		64.6751	-0.974755	4.91421e-05	0.00112739
ANKZF1	85.4486	111.165	98.6191	118.002	86.5138	70.078	130.672	105.659		87.9687	-0.0747232	0.772374	0.888429
ANLN	247.058	294.381	226.102	331.06	281.17	297.832	245.011	368.941		305.416	0.116091	0.548534	0.751144
ANO1	7.43031	4.11722	0	3.27783	4.80632	6.37073	3.62979	1.73212		3.65594	0.0989609	0.903184	0.958642
ANO10	81.7335	104.989	93.8084	95.0569	64.8853	78.0414	70.7808	90.0701		112.72	-0.293762	0.161513	0.382232
ANO2	9.28789	6.17583	7.21603	4.91674	4.80632	4.77805	3.62979	1.73212		3.6948	-0.893251	0.247321	0.487445
ANO4	7.43031	0	7.21603	3.27783	2.40316	1.59268	0	1.73212		2.85188	-1.67183	0.121355	0.32114
ANO5	24.1485	28.8205	31.2695	22.9448	19.2253	27.0756	14.5191	25.9818		26.1691	-0.271566	0.449403	0.675281
ANO6	109.597	129.692	76.971	129.474	192.253	189.529	156.081	202.658		159.046	0.715918	3.68249e-05	0.000896025
ANO7	3.71516	2.05861	7.21603	4.91674	4.80632	3.18536	10.8894	10.3927		5.60256	0.74198	0.282281	0.52249
ANO8	94.7365	131.751	187.617	154.058	81.7074	60.5219	125.228	86.6059		68.3739	-0.678303	0.00589684	0.0434923
ANO9	5.57274	12.3517	36.0802	14.7502	0	11.1488	12.7043	8.66059		8.37497	-0.971279	0.0966528	0.278721
ANOS1	456.964	450.836	437.773	434.312	473.423	484.175	373.868	382.798		524.751	-0.0562183	0.654554	0.820304
ANP32A	187.615	226.447	156.347	216.336	225.897	205.456	154.266	233.836		486.839	0.0484892	0.762132	0.88314
ANP32B	83.591	76.1686	60.1336	119.641	134.577	136.971	108.894	116.052		236.533	0.52037	0.0101771	0.0629092
ANP32D	1.85758	0	0	0	0	0	0	0		4.16001	-0.802662	0.590565	0.780675
ANP32E	104.024	111.165	88.9977	122.918	158.609	160.861	83.4851	143.766		290.185	0.346947	0.136958	0.345654
ANPEP	5.57274	4.11722	4.81069	4.91674	4.80632	4.77805	3.62979	1.73212		4.67273	-0.401478	0.598832	0.785755
ANTKMT	24.1485	24.7033	36.0802	27.8615	33.6442	44.5951	49.0021	43.3029		32.3866	0.625641	0.0352438	0.144379
ANTXR1	35.294	39.1136	31.2695	27.8615	19.2253	41.4097	19.9638	31.1781		53.6421	-0.212673	0.486275	0.705291
ANTXR2	7.43031	18.5275	0	6.55565	4.80632	3.18536	5.44468	5.19635		8.34919	-0.842588	0.184359	0.414191
ANXA1	0	0	0	1.63891	2.40316	7.96341	9.07447	3.46424		7.58219	3.30842	0.00413315	0.0334793
ANXA11	120.743	119.399	158.753	134.391	112.949	76.4488	105.264	100.463		133.614	-0.440428	0.0107784	0.065438
ANXA2	89.1638	121.458	103.43	81.9456	189.85	159.268	159.711	197.461		266.189	0.842319	1.76124e-06	6.76764e-05
ANXA3	29.7213	16.4689	24.0534	26.2226	12.0158	19.1122	14.5191	20.7854		39.7191	-0.521106	0.161929	0.382588
ANXA5	165.324	207.92	173.185	152.419	122.561	197.493	168.785	142.034		356.818	-0.130328	0.460062	0.684005
ANXA6	170.897	170.865	137.105	116.363	175.431	152.898	154.266	126.445		272.644	0.029017	0.873213	0.946653
ANXA7	169.04	174.982	120.267	139.308	187.446	195.9	161.526	164.551		213.893	0.226645	0.124851	0.326551
ANXA9	5.57274	2.05861	0	1.63891	2.40316	3.18536	0	0		1.93572	-0.80371	0.506355	0.720546
AOC2	20.4334	22.6447	19.2428	22.9448	4.80632	14.3341	19.9638	29.446		9.75014	-0.279641	0.530178	0.738594
AOC3	13.0031	8.23444	9.62138	9.83348	12.0158	3.18536	7.25957	17.3212		5.13441	-0.0600338	0.921597	0.965017
AOPEP	22.2909	28.8205	24.0534	8.19456	16.8221	12.7415	18.1489	8.66059		13.6942	-0.552937	0.226913	0.465223
AOX1	24.1485	12.3517	28.8641	16.3891	2.40316	15.9268	1.81489	5.19635		13.7633	-1.57179	0.00239115	0.0224614
AP000349.1	9.28789	6.17583	14.4321	13.1113	2.40316	7.96341	9.07447	1.73212		4.32169	-0.974386	0.136795	0.345392
AP000721.1	48.297	34.9964	45.7015	59.0009	64.8853	36.6317	72.5957	51.9635		37.9799	0.250431	0.498941	0.714704
AP002748.5	13.0031	4.11722	9.62138	3.27783	12.0158	9.55609	14.5191	5.19635		6.80255	0.465636	0.514653	0.727234
AP1AR	24.1485	41.1722	26.4588	31.1393	40.8537	47.7805	12.7043	29.446		25.4457	0.0864517	0.802565	0.903507
AP1B1	334.364	292.323	315.1	275.337	372.49	379.058	382.942	318.71		373.309	0.257234	0.0450467	0.169566
AP1G1	124.458	133.81	129.889	131.113	108.142	97.1536	101.634	121.248		150.433	-0.279816	0.0944555	0.275389
AP1G2	98.4517	78.2272	127.483	98.3348	93.7232	93.9683	194.194	119.516		93.8422	0.328294	0.149708	0.3646
AP1M1	74.3031	65.8755	48.1069	63.9176	69.6916	44.5951	59.8915	53.6956		66.0763	-0.180062	0.436467	0.664322
AP1M2	183.9	179.099	240.534	219.614	228.3	235.717	261.345	240.764		294.024	0.235623	0.14308	0.354897
AP1S1	44.5819	28.8205	67.3496	18.028	26.4348	27.0756	34.483	32.9102		58.1417	-0.335093	0.256046	0.495754
AP1S2	165.324	238.799	199.644	222.892	206.672	238.902	179.674	209.586		285.983	0.0168724	0.913147	0.962052
AP1S3	3.71516	8.23444	2.40534	1.63891	0	1.59268	1.81489	6.92847		6.79481	-0.515373	0.540962	0.747034
AP2A1	371.516	376.726	430.557	324.505	374.893	399.763	493.651	389.726		354.6	0.147977	0.315638	0.556531
AP2B1	516.407	578.469	481.069	658.843	569.549	570.18	597.1	521.367		689.679	0.0122296	0.941633	0.971881
AP2M1	573.992	549.649	512.338	499.868	824.284	826.602	829.406	803.703		711.448	0.620535	1.00867e-10	1.34464e-08
AP2S1	135.603	107.048	117.862	78.6678	136.98	121.044	137.932	143.766		221.403	0.302636	0.168826	0.392935
AP3B1	170.897	162.63	103.43	183.558	161.012	189.529	143.377	136.837		182.712	0.0115773	0.951014	0.976416
AP3B2	18.5758	18.5275	12.0267	21.3059	0	3.18536	10.8894	6.92847		12.0937	-1.70379	0.00207108	0.0203474
AP3D1	468.11	512.594	526.77	411.367	728.158	680.075	624.323	678.99		507.57	0.502828	7.73399e-06	0.000241913
AP3M1	46.4395	65.8755	74.5657	78.6678	60.079	65.3	56.2617	64.0884		93.8969	-0.106502	0.623557	0.800494
AP3M2	13.0031	20.5861	24.0534	21.3059	21.6284	14.3341	25.4085	15.5891		21.4029	-0.0446251	0.903129	0.958642
AP3S1	44.5819	34.9964	28.8641	40.9728	16.8221	35.039	30.8532	22.5175		48.171	-0.490629	0.125931	0.328418
AP3S2	1.85758	0	0	0	9.61264	11.1488	0	0		7.72297	3.08672	0.00790609	0.0530644
AP4B1	26.0061	43.2308	12.0267	22.9448	40.8537	38.2244	45.3723	46.7672		30.322	0.705709	0.0414967	0.160632
AP4E1	55.7274	37.055	38.4855	34.4172	36.0474	52.5585	39.9277	43.3029		36.8707	0.0664579	0.813133	0.910604
AP4M1	26.0061	39.1136	21.6481	22.9448	21.6284	19.1122	34.483	31.1781		24.5605	-0.0360686	0.911789	0.961591
AP4S1	5.57274	6.17583	2.40534	6.55565	7.20948	3.18536	0	3.46424		8.61125	-0.710319	0.360117	0.600004
AP5B1	78.0183	82.3444	156.347	86.8624	33.6442	41.4097	59.8915	38.1066		52.5399	-1.1959	1.57393e-05	0.000435385
AP5M1	46.4395	63.8169	55.3229	78.6678	91.3201	98.7463	78.0404	116.052		60.9041	0.646691	0.00621195	0.0453624
AP5S1	1.85758	2.05861	4.81069	11.4724	2.40316	1.59268	9.07447	6.92847		5.30042	-0.0618285	0.930927	0.968342
AP5Z1	81.7335	45.2894	76.971	49.1674	67.2885	60.5219	119.783	60.6241		52.9205	0.292168	0.280665	0.520961
APAF1	31.5788	49.4066	38.4855	32.7783	36.0474	38.2244	45.3723	39.8387		42.9973	0.0814486	0.789791	0.897314
APBA3	63.1577	32.9378	81.7817	32.7783	67.2885	63.7073	74.4106	64.0884		41.5392	0.383136	0.145372	0.358101
APBB1	94.7365	78.2272	103.43	101.613	62.4822	68.4853	65.3362	38.1066		70.4787	-0.692365	0.00236768	0.0223414
APBB2	85.4486	80.2858	76.971	116.363	72.0948	65.3	90.7447	58.892		73.19	-0.341503	0.125852	0.328279
APBB3	13.0031	12.3517	26.4588	11.4724	12.0158	11.1488	29.0383	15.5891		9.27573	0.146875	0.746565	0.875757
APC	234.055	226.447	127.483	195.031	300.395	264.385	183.304	306.585		153.88	0.41953	0.0280195	0.12442
APC2	18.5758	20.5861	36.0802	19.667	7.20948	9.55609	12.7043	3.46424		9.11753	-1.49609	0.00348397	0.0293991
APCDD1	61.3001	41.1722	67.3496	63.9176	33.6442	25.4829	36.2979	31.1781		28.7521	-0.893647	0.00427724	0.0343578
APCDD1L	9.28789	10.2931	16.8374	4.91674	7.20948	4.77805	5.44468	1.73212		7.02337	-1.10041	0.0837755	0.254927
APEH	351.082	384.96	365.612	345.811	389.312	328.093	355.719	327.37		417.541	-0.0508079	0.705749	0.852616
APELA	26.0061	12.3517	7.21603	11.4724	7.20948	6.37073	7.25957	17.3212		25.1541	-0.590099	0.250467	0.490497
APEX1	700.307	652.579	560.445	583.453	730.561	697.595	633.398	625.294		727.545	0.102003	0.334879	0.576265
APEX2	91.0214	80.2858	69.755	93.418	103.336	119.451	98.0042	71.0168		84.0677	0.216203	0.291384	0.531323
APH1A	115.17	92.6375	96.2138	132.752	144.19	111.488	159.711	98.7307		107.161	0.221143	0.36322	0.602886
APH1B	14.8606	12.3517	26.4588	19.667	24.0316	12.7415	10.8894	3.46424		24.3201	-0.579608	0.172895	0.39886
API5	237.77	271.737	199.644	250.754	225.897	199.085	183.304	197.461		290.607	-0.262171	0.0978822	0.280742
APIP	29.7213	26.7619	19.2428	42.6117	12.0158	31.8536	27.2234	31.1781		39.3994	-0.202338	0.543718	0.748387
APLF	3.71516	10.2931	4.81069	11.4724	2.40316	3.18536	3.62979	5.19635		6.65277	-1.07649	0.118637	0.316104
APLNR	13.0031	2.05861	0	14.7502	0	1.59268	3.62979	0		5.23473	-2.49414	0.0684403	0.224745
APLP1	33.4364	39.1136	57.7283	42.6117	28.8379	17.5195	19.9638	15.5891		28.779	-1.09926	0.000522571	0.00726786
APLP2	861.916	895.495	928.463	875.179	802.656	844.122	778.589	774.257		1165.75	-0.152983	0.144933	0.357651
APMAP	81.7335	125.575	105.835	98.3348	120.158	122.637	110.708	112.588		153.887	0.188027	0.254051	0.493875
APOA1	0	2.05861	31.2695	14.7502	2.40316	4.77805	1.81489	1.73212		7.50099	-2.09655	0.0170446	0.0886248
APOA2	0	0	0	1.63891	0	0	0	0		1.64122	-0.802662	0.606062	0.789799
APOB	14.8606	8.23444	2.40534	22.9448	24.0316	35.039	9.07447	13.8569		10.445	0.695011	0.171285	0.396815
APOBEC3B	7.43031	4.11722	14.4321	8.19456	0	3.18536	3.62979	1.73212		7.48719	-1.8705	0.0202613	0.099255
APOBEC3C	33.4364	22.6447	36.0802	44.2506	26.4348	23.8902	29.0383	43.3029		35.7252	-0.161535	0.578747	0.772177
APOBEC3F	3.71516	2.05861	4.81069	4.91674	2.40316	4.77805	5.44468	1.73212		5.72999	-0.0863971	0.91294	0.961995
APOC1	20.4334	12.3517	7.21603	24.5837	12.0158	12.7415	7.25957	15.5891		36.1581	-0.497736	0.23114	0.47046
APOE	1562.22	1414.27	1842.49	1219.35	1071.81	912.607	1243.2	855.666		1322.85	-0.563856	0.000281897	0.00457452
APOL2	14.8606	16.4689	26.4588	18.028	14.419	14.3341	14.5191	17.3212		22.7949	-0.293913	0.445407	0.671083
APOO	27.8637	32.9378	26.4588	34.4172	19.2253	47.7805	23.5936	45.0351		74.6215	0.192233	0.506848	0.721002
APOOL	7.43031	2.05861	0	13.1113	14.419	9.55609	12.7043	12.1248		20.3844	0.937274	0.0758714	0.240429
APP	1417.33	1531.61	1549.04	1552.05	1564.46	1562.42	1649.74	1616.07		2250.6	0.0798062	0.485958	0.705134
APPBP2	13.0031	28.8205	14.4321	24.5837	14.419	22.2976	18.1489	24.2496		24.3427	-0.0198607	0.956555	0.978897
APPL1	46.4395	67.9341	55.3229	85.2235	122.561	95.5609	61.7064	105.659		99.9888	0.571211	0.0123149	0.0720189
APPL2	29.7213	39.1136	33.6748	42.6117	14.419	17.5195	16.334	22.5175		26.8867	-1.02645	0.00221806	0.0214629
APRT	226.625	226.447	216.481	201.586	223.494	229.346	228.677	193.997		270.029	0.00785303	0.965509	0.98313
APTX	52.0122	41.1722	19.2428	50.8063	57.6758	52.5585	36.2979	53.6956		56.2208	0.258282	0.386403	0.624052
AQP11	3.71516	10.2931	7.21603	4.91674	2.40316	4.77805	1.81489	3.46424		3.76298	-1.00687	0.219534	0.457526
AQP3	5.57274	6.17583	0	3.27783	2.40316	6.37073	5.44468	1.73212		3.31841	0.0831497	0.920413	0.964763
AQR	261.919	341.729	305.479	313.032	264.348	316.944	255.9	311.781		330.228	-0.0846677	0.608172	0.790789
AR	52.0122	57.6411	38.4855	47.5285	26.4348	31.8536	29.0383	29.446		30.4692	-0.742102	0.0101836	0.0629092
ARAF	46.4395	90.5789	93.8084	60.6398	69.6916	81.2268	99.8191	64.0884		61.8878	0.139271	0.540421	0.746557
ARAP1	206.191	166.747	271.804	162.252	211.478	207.049	277.679	185.337		172.168	0.138956	0.421678	0.653643
ARAP3	254.488	199.685	269.399	214.698	170.624	160.861	210.528	178.408		162.27	-0.378047	0.0528231	0.189076
ARC	13.0031	8.23444	40.8908	16.3891	7.20948	3.18536	7.25957	5.19635		11.9696	-1.77685	0.00322272	0.0277743
ARCN1	196.903	189.392	161.158	213.059	213.881	230.939	181.489	278.871		342.223	0.246973	0.123737	0.324993
AREL1	81.7335	84.403	67.3496	75.39	91.3201	92.3756	112.523	102.195		56.5477	0.36597	0.107637	0.297551
ARF1	325.076	282.03	334.343	244.198	295.589	339.241	348.46	311.781		480.385	0.138464	0.286648	0.526296
ARF3	61.3001	65.8755	60.1336	57.3619	60.079	71.6707	45.3723	55.4278		100.079	-0.0658153	0.770154	0.887258
ARF4	85.4486	78.2272	52.9176	93.418	74.498	81.2268	94.3745	98.7307		205.391	0.156181	0.462664	0.686924
ARF5	141.176	94.6961	105.835	98.3348	105.739	116.266	105.264	103.927		182.669	-0.0289751	0.893258	0.95564
ARF6	117.027	131.751	134.699	96.6958	156.205	144.934	166.97	173.212		169.07	0.431912	0.00666986	0.0473476
ARFGAP1	91.0214	53.5239	67.3496	73.7511	79.3043	89.1902	61.7064	53.6956		78.114	-0.020878	0.921587	0.965017
ARFGAP2	104.024	67.9341	105.835	83.5845	112.949	89.1902	78.0404	69.2847		105.958	-0.0616344	0.74657	0.875757
ARFGAP3	18.5758	14.4103	24.0534	31.1393	16.8221	17.5195	23.5936	22.5175		37.1277	-0.141967	0.686565	0.84091
ARFGEF1	393.807	409.663	348.775	445.784	377.296	452.322	444.649	552.546		399.582	0.193508	0.239028	0.479165
ARFGEF2	124.458	142.044	134.699	126.196	218.688	229.346	235.936	211.318		128.13	0.768611	4.05613e-07	1.96245e-05
ARFGEF3	131.888	162.63	214.076	181.919	194.656	191.122	196.008	168.015		137.645	0.124227	0.472027	0.694489
ARFIP1	31.5788	41.1722	19.2428	32.7783	21.6284	46.1878	23.5936	38.1066		66.8676	0.0730667	0.809282	0.907542
ARFIP2	91.0214	76.1686	62.5389	67.1954	103.336	90.7829	92.5596	69.2847		91.6193	0.251609	0.344633	0.585549
ARFRP1	18.5758	26.7619	26.4588	9.83348	19.2253	19.1122	29.0383	19.0533		23.5704	0.128126	0.735279	0.86897
ARG2	115.17	111.165	64.9443	109.807	69.6916	79.6341	65.3362	57.1599		98.9516	-0.577734	0.00369148	0.0307362
ARGLU1	235.912	265.561	228.508	308.116	264.348	202.271	183.304	214.783		186.834	-0.279945	0.0675707	0.222589
ARHGAP1	70.588	51.4653	55.3229	75.39	81.7074	71.6707	85.3	65.8205		123.827	0.240957	0.235239	0.474837
ARHGAP10	13.0031	10.2931	9.62138	18.028	12.0158	7.96341	9.07447	10.3927		12.1034	-0.419625	0.419953	0.652119
ARHGAP11A	9.28789	4.11722	9.62138	4.91674	9.61264	11.1488	23.5936	17.3212		8.60415	1.1824	0.0315676	0.134686
ARHGAP12	96.5941	123.517	86.5924	104.89	108.142	92.3756	87.1149	105.659		93.1065	-0.0752786	0.709556	0.854428
ARHGAP17	135.603	144.103	105.835	91.7791	115.352	135.378	157.896	129.909		135.749	0.185423	0.283697	0.523566
ARHGAP18	31.5788	20.5861	9.62138	26.2226	7.20948	14.3341	16.334	17.3212		17.9182	-0.675272	0.0949497	0.276054
ARHGAP21	215.479	244.975	228.508	222.892	264.348	243.68	234.121	266.746		152.724	0.145467	0.333385	0.574643
ARHGAP22	37.1516	30.8792	21.6481	22.9448	45.66	46.1878	27.2234	29.446		20.0006	0.388666	0.316585	0.556963
ARHGAP23	1.85758	41.1722	64.9443	27.8615	72.0948	41.4097	32.6681	1.73212		19.1093	0.123035	0.897566	0.957307
ARHGAP24	0	6.17583	4.81069	6.55565	14.419	6.37073	12.7043	13.8569		7.7816	1.40781	0.0310622	0.133256
ARHGAP26	11.1455	32.9378	28.8641	34.4172	31.2411	25.4829	14.5191	24.2496		27.3314	-0.185549	0.589929	0.780048
ARHGAP28	7.43031	2.05861	7.21603	1.63891	12.0158	9.55609	1.81489	10.3927		7.16435	0.911501	0.167498	0.390692
ARHGAP29	29.7213	14.4103	4.81069	18.028	4.80632	20.7049	10.8894	29.446		13.7756	-0.0143956	0.975818	0.987843
ARHGAP31	40.8667	30.8792	26.4588	29.5004	24.0316	15.9268	41.7425	27.7139		21.845	-0.234764	0.498899	0.714704
ARHGAP32	135.603	146.161	175.59	177.003	144.19	136.971	166.97	171.48		107.413	-0.0314219	0.847468	0.929507
ARHGAP33	83.591	82.3444	103.43	55.723	55.2727	46.1878	72.5957	57.1599		46.2979	-0.476117	0.0528417	0.189076
ARHGAP35	375.231	356.14	286.236	345.811	459.004	508.066	450.094	478.064		267.066	0.471939	0.000180364	0.00324424
ARHGAP39	50.1546	69.9927	105.835	62.2787	86.5138	92.3756	74.4106	86.6059		53.4301	0.267146	0.219018	0.45742
ARHGAP4	61.3001	57.6411	84.187	67.1954	182.64	121.044	127.043	110.856		71.9655	0.996344	8.02262e-06	0.000247614
ARHGAP40	0	0	7.21603	1.63891	0	0	1.81489	1.73212		1.2865	-1.15516	0.474935	0.696472
ARHGAP42	52.0122	76.1686	62.5389	86.8624	57.6758	54.1512	54.4468	55.4278		60.5717	-0.336867	0.151188	0.366203
ARHGAP44	26.0061	49.4066	50.5122	37.695	38.4506	31.8536	23.5936	24.2496		27.3059	-0.469099	0.127515	0.33117
ARHGAP45	118.885	94.6961	129.889	98.3348	91.3201	71.6707	81.6702	74.4811		76.5287	-0.47223	0.03989	0.156733
ARHGAP5	224.767	232.623	235.724	240.92	175.431	184.751	136.117	230.372		135.055	-0.359283	0.0367829	0.148908
ARHGDIA	172.755	187.334	161.158	167.169	264.348	187.937	263.16	280.603		307.919	0.527783	0.00182247	0.0184768
ARHGEF1	76.1607	96.7547	96.2138	86.8624	93.7232	73.2634	137.932	84.8738		88.2966	0.132223	0.524956	0.734259
ARHGEF10L	148.606	150.279	177.995	122.918	168.221	113.08	139.747	121.248		93.0858	-0.149231	0.424902	0.655478
ARHGEF11	131.888	119.399	144.321	96.6958	141.786	109.895	132.487	136.837		84.3367	0.0859875	0.664818	0.826307
ARHGEF12	130.031	142.044	101.024	162.252	161.012	184.751	203.268	223.443		100.684	0.521627	0.0027372	0.0246584
ARHGEF15	0	6.17583	4.81069	1.63891	2.40316	3.18536	9.07447	0		2.39822	0.29866	0.751611	0.87834
ARHGEF16	85.4486	84.403	76.971	85.2235	122.561	116.266	139.747	105.659		83.8674	0.538188	0.00857063	0.0560828
ARHGEF17	87.3062	90.5789	132.294	77.0289	64.8853	44.5951	43.5574	48.4993		42.6826	-0.944596	0.000136185	0.00260937
ARHGEF18	1.85758	0	2.40534	3.27783	0	1.59268	0	0		2.47908	-1.77867	0.182504	0.411471
ARHGEF19	167.182	137.927	190.022	129.474	91.3201	122.637	87.1149	95.2665		92.7497	-0.644344	0.00687063	0.048179
ARHGEF2	139.318	123.517	151.537	129.474	141.786	141.749	176.045	138.569		122.884	0.141186	0.496016	0.712877
ARHGEF25	9.28789	8.23444	7.21603	18.028	0	4.77805	0	3.46424		3.93564	-2.27594	0.00635094	0.0460021
ARHGEF26	14.8606	10.2931	9.62138	13.1113	4.80632	12.7415	9.07447	5.19635		10.9161	-0.562377	0.276123	0.516047
ARHGEF3	5.57274	4.11722	4.81069	11.4724	2.40316	6.37073	1.81489	3.46424		6.07318	-0.884076	0.207372	0.442776
ARHGEF35	7.43031	10.2931	12.0267	13.1113	16.8221	28.6683	29.0383	17.3212		12.3817	1.11744	0.0137059	0.0773641
ARHGEF39	55.7274	32.9378	48.1069	39.3339	21.6284	25.4829	30.8532	24.2496		36.2318	-0.772296	0.0091632	0.0586735
ARHGEF4	53.8698	43.2308	48.1069	54.0841	19.2253	19.1122	10.8894	15.5891		20.1979	-1.63441	1.22683e-06	4.9752e-05
ARHGEF40	378.946	267.619	428.151	313.032	185.043	194.307	250.455	188.801		196.882	-0.755043	4.20944e-06	0.000144516
ARHGEF5	228.482	255.268	238.129	232.726	288.379	316.944	344.83	285.799		181.561	0.374971	0.0367958	0.148908
ARHGEF6	14.8606	8.23444	19.2428	9.83348	2.40316	6.37073	5.44468	22.5175		10.6765	-0.42171	0.408571	0.642485
ARHGEF7	83.591	74.11	72.1603	96.6958	117.755	90.7829	85.3	95.2665		92.5754	0.221995	0.227607	0.465731
ARHGEF9	39.0092	63.8169	50.5122	68.8343	57.6758	7.96341	32.6681	29.446		41.9216	-0.872925	0.00515256	0.039394
ARID1A	995.662	837.854	846.681	832.568	752.189	746.968	709.623	782.917		640.459	-0.232102	0.0598393	0.204614
ARID1B	581.422	473.48	495.501	460.534	523.889	578.144	595.285	588.92		364.212	0.187936	0.0901822	0.267619
ARID2	302.785	314.967	233.318	329.421	254.735	222.976	154.266	230.372		244.261	-0.465007	0.00357496	0.030024
ARID3A	167.182	187.334	185.211	132.752	182.64	151.305	230.491	190.533		151.254	0.173146	0.355301	0.595154
ARID3B	304.643	317.026	259.777	216.336	358.071	334.463	312.162	318.71		294.64	0.270593	0.0501346	0.18215
ARID4A	29.7213	43.2308	7.21603	21.3059	16.8221	50.9658	10.8894	43.3029		23.3398	0.283191	0.486875	0.705869
ARID4B	105.882	119.399	74.5657	119.641	132.174	130.6	98.0042	152.426		93.3224	0.279034	0.176783	0.404278
ARID5A	44.5819	34.9964	43.2962	31.1393	19.2253	17.5195	30.8532	20.7854		22.3203	-0.790924	0.0194794	0.0967103
ARID5B	1.85758	10.2931	9.62138	4.91674	2.40316	7.96341	12.7043	3.46424		6.29827	0.085233	0.89738	0.95719
ARIH1	72.4456	88.5202	103.43	90.1402	96.1264	109.895	87.1149	105.659		120.287	0.184639	0.317661	0.557977
ARIH2	161.609	121.458	105.835	106.529	201.865	183.158	223.232	143.766		130.542	0.595286	0.00295592	0.0260483
ARIH2OS	146.749	84.403	96.2138	77.0289	148.996	111.488	165.155	96.9986		63.0437	0.365808	0.242733	0.483344
ARL1	42.7243	34.9964	26.4588	44.2506	43.2569	39.8171	32.6681	38.1066		89.2501	0.0166587	0.9499	0.975912
ARL10	9.28789	6.17583	7.21603	3.27783	2.40316	7.96341	5.44468	3.46424		5.01986	-0.35573	0.618515	0.797779
ARL13B	1.85758	6.17583	7.21603	9.83348	9.61264	7.96341	9.07447	12.1248		10.5047	0.613692	0.286421	0.526113
ARL14EP	40.8667	16.4689	28.8641	37.695	38.4506	31.8536	30.8532	41.5708		44.5472	0.171075	0.542433	0.747741
ARL15	14.8606	26.7619	4.81069	11.4724	19.2253	3.18536	3.62979	8.66059		17.2295	-0.865091	0.0971242	0.279528
ARL16	40.8667	20.5861	50.5122	27.8615	31.2411	31.8536	56.2617	39.8387		42.6023	0.211187	0.5244	0.733891
ARL2	46.4395	51.4653	72.1603	47.5285	16.8221	27.0756	52.6319	51.9635		82.7135	-0.513516	0.104133	0.292117
ARL2BP	11.1455	4.11722	7.21603	6.55565	9.61264	1.59268	5.44468	8.66059		12.4993	-0.279335	0.633211	0.805641
ARL3	46.4395	80.2858	57.7283	77.0289	38.4506	46.1878	56.2617	48.4993		97.6097	-0.46019	0.0617621	0.209456
ARL4A	9.28789	20.5861	12.0267	24.5837	12.0158	27.0756	14.5191	32.9102		29.0768	0.395441	0.281937	0.5221
ARL4C	40.8667	55.5825	43.2962	27.8615	24.0316	20.7049	23.5936	24.2496		23.9332	-0.842977	0.00665723	0.0473476
ARL4D	11.1455	14.4103	28.8641	21.3059	2.40316	1.59268	10.8894	6.92847		15.5935	-1.75635	0.00114567	0.0131952
ARL5A	53.8698	61.7583	38.4855	34.4172	38.4506	41.4097	41.7425	60.6241		31.1356	-0.0352957	0.896506	0.95706
ARL5B	31.5788	26.7619	21.6481	32.7783	33.6442	22.2976	29.0383	24.2496		50.9999	-0.0950356	0.754508	0.880271
ARL6	0	0	0	4.91674	0	3.18536	1.81489	1.73212		3.54024	0.344731	0.774977	0.889389
ARL6IP1	29.7213	28.8205	16.8374	44.2506	19.2253	27.0756	23.5936	36.3745		70.0012	-0.190323	0.544598	0.748773
ARL6IP4	271.206	292.323	307.884	244.198	269.154	246.866	261.345	218.247		242.587	-0.163169	0.411885	0.644523
ARL6IP5	42.7243	43.2308	40.8908	57.3619	50.4664	54.1512	61.7064	62.3562		76.3444	0.301578	0.199265	0.431632
ARL6IP6	78.0183	57.6411	103.43	91.7791	60.079	52.5585	68.9659	36.3745		78.3663	-0.607757	0.0185938	0.0936867
ARL8A	26.0061	12.3517	19.2428	19.667	24.0316	38.2244	29.0383	32.9102		55.0316	0.698282	0.0276068	0.123286
ARL8B	13.0031	39.1136	26.4588	22.9448	24.0316	25.4829	27.2234	24.2496		47.4826	0.0169679	0.958603	0.979713
ARMC1	55.7274	61.7583	50.5122	45.8896	57.6758	79.6341	56.2617	69.2847		76.3959	0.317827	0.150831	0.365724
ARMC10	27.8637	24.7033	28.8641	49.1674	31.2411	1.59268	43.5574	25.9818		21.5371	-0.364322	0.632405	0.805427
ARMC2	0	8.23444	4.81069	4.91674	2.40316	4.77805	1.81489	5.19635		5.47737	-0.269371	0.731443	0.867568
ARMC4	11.1455	30.8792	12.0267	14.7502	0	1.59268	3.62979	1.73212		10.9151	-3.2212	5.97576e-05	0.0013348
ARMC5	31.5788	26.7619	55.3229	40.9728	28.8379	41.4097	54.4468	45.0351		28.8323	0.160192	0.632281	0.805411
ARMC6	239.628	158.513	185.211	165.53	230.703	269.163	259.53	193.997		191.073	0.349872	0.0243774	0.113348
ARMC7	14.8606	14.4103	9.62138	8.19456	28.8379	9.55609	18.1489	13.8569		16.6761	0.525505	0.241575	0.482565
ARMC8	52.0122	37.055	50.5122	73.7511	74.498	58.9293	58.0766	67.5526		66.957	0.246249	0.283075	0.523265
ARMC9	52.0122	57.6411	50.5122	57.3619	55.2727	52.5585	38.1128	27.7139		59.8164	-0.345335	0.156688	0.374278
ARMCX1	74.3031	74.11	57.7283	62.2787	45.66	68.4853	50.817	65.8205		74.2007	-0.202259	0.383504	0.621315
ARMCX2	239.628	216.154	209.265	178.641	240.316	175.195	166.97	145.498		219.717	-0.223933	0.20233	0.43586
ARMCX3	35.294	22.6447	24.0534	40.9728	16.8221	30.261	29.0383	48.4993		37.0426	0.0234344	0.941607	0.971881
ARMCX4	65.0153	63.8169	67.3496	65.5565	62.4822	95.5609	52.6319	86.6059		50.8658	0.199245	0.413404	0.646334
ARMCX5	33.4364	45.2894	33.6748	42.6117	45.66	30.261	25.4085	51.9635		39.9868	-0.0356046	0.904609	0.959173
ARMCX6	11.1455	20.5861	7.21603	16.3891	21.6284	15.9268	10.8894	17.3212		16.7755	0.206063	0.645165	0.813669
ARMH3	27.8637	22.6447	24.0534	13.1113	16.8221	31.8536	25.4085	34.6424		34.221	0.370157	0.255785	0.495754
ARMH4	61.3001	57.6411	57.7283	52.4452	38.4506	22.2976	18.1489	17.3212		44.127	-1.29967	7.8097e-06	0.000242818
ARMT1	183.9	166.747	146.726	211.42	317.217	337.649	406.536	422.637		349.479	1.05973	2.18306e-09	1.93553e-07
ARNT	42.7243	67.9341	50.5122	73.7511	40.8537	49.3732	70.7808	67.5526		76.9933	-0.0362514	0.876457	0.948102
ARNT2	22.2909	20.5861	12.0267	18.028	7.20948	9.55609	7.25957	6.92847		13.2482	-1.23919	0.0153277	0.0829642
ARNTL	13.0031	10.2931	7.21603	0	12.0158	12.7415	10.8894	10.3927		8.6036	0.638917	0.235957	0.475901
ARNTL2	46.4395	32.9378	24.0534	31.1393	14.419	22.2976	10.8894	19.0533		14.2542	-1.00521	0.0137388	0.0774105
ARPC1A	20.4334	8.23444	9.62138	13.1113	7.20948	14.3341	12.7043	15.5891		15.8205	-0.0340491	0.94061	0.971881
ARPC1B	0	0	2.40534	0	0	3.18536	1.81489	8.66059		4.94677	2.60946	0.0276281	0.123293
ARPC2	217.337	218.213	175.59	165.53	218.688	281.905	212.343	265.014		326.809	0.340309	0.0260051	0.118069
ARPC3	133.746	156.454	129.889	144.224	182.64	178.38	108.894	171.48		318.343	0.179152	0.290119	0.529992
ARPC4	39.0092	43.2308	43.2962	40.9728	43.2569	30.261	32.6681	48.4993		84.0631	-0.113135	0.702929	0.850917
ARPC5	76.1607	61.7583	57.7283	62.2787	69.6916	54.1512	61.7064	77.9453		110.817	0.0183594	0.934986	0.969798
ARPC5L	44.5819	51.4653	26.4588	45.8896	72.0948	105.117	74.4106	57.1599		83.1384	0.865601	0.00151132	0.0161591
ARPP19	68.7304	74.11	79.3763	80.3067	88.9169	74.8561	50.817	95.2665		139.9	0.0293331	0.902328	0.958642
ARRB1	63.1577	45.2894	81.7817	80.3067	105.739	130.6	132.487	136.837		122.732	0.906491	0.00141488	0.0153905
ARRB2	52.0122	74.11	48.1069	49.1674	38.4506	27.0756	29.0383	34.6424		47.9658	-0.804845	0.00282938	0.0252889
ARRDC1	59.4425	49.4066	76.971	62.2787	12.0158	30.261	45.3723	43.3029		39.9713	-0.882059	0.00474358	0.0372589
ARRDC2	1.85758	8.23444	19.2428	9.83348	4.80632	3.18536	1.81489	0		4.25909	-2.0299	0.0158397	0.0847875
ARRDC3	11.1455	20.5861	9.62138	14.7502	28.8379	31.8536	23.5936	32.9102		22.2676	1.05736	0.00564377	0.0421466
ARRDC4	9.28789	22.6447	16.8374	16.3891	24.0316	23.8902	12.7043	12.1248		19.081	0.156619	0.716484	0.858178
ARSA	18.5758	14.4103	24.0534	31.1393	9.61264	7.96341	25.4085	12.1248		17.1756	-0.687184	0.106757	0.296537
ARSB	44.5819	55.5825	36.0802	47.5285	28.8379	35.039	41.7425	24.2496		34.9683	-0.502285	0.0652775	0.21732
ARSD	11.1455	16.4689	19.2428	18.028	16.8221	17.5195	7.25957	12.1248		13.9698	-0.271863	0.542286	0.747649
ARSE	61.3001	69.9927	84.187	88.5013	72.0948	113.08	107.079	107.391		113.406	0.402738	0.190763	0.422342
ARSG	13.0031	8.23444	21.6481	13.1113	2.40316	6.37073	12.7043	3.46424		7.89398	-1.10219	0.0455296	0.170614
ARSI	29.7213	18.5275	38.4855	16.3891	12.0158	14.3341	16.334	19.0533		14.5944	-0.695418	0.0842677	0.255804
ARSJ	14.8606	6.17583	2.40534	13.1113	0	7.96341	7.25957	10.3927		5.16441	-0.494193	0.444599	0.670268
ARSK	13.0031	28.8205	21.6481	13.1113	26.4348	15.9268	18.1489	25.9818		35.201	0.187702	0.615794	0.796217
ART5	16.7182	16.4689	16.8374	8.19456	4.80632	3.18536	10.8894	1.73212		11.1387	-1.49078	0.00837162	0.0550393
ARTN	5.57274	16.4689	7.21603	14.7502	4.80632	11.1488	21.7787	3.46424		7.2462	-0.0859258	0.881629	0.950765
ARV1	18.5758	20.5861	12.0267	13.1113	28.8379	19.1122	18.1489	13.8569		20.6185	0.280943	0.506057	0.720368
ARVCF	170.897	127.634	197.238	168.808	134.577	92.3756	130.672	109.123		94.8138	-0.518797	0.0048984	0.0381017
AS3MT	18.5758	32.9378	19.2428	26.2226	26.4348	12.7415	7.25957	3.46424		32.2307	-1.06605	0.00685009	0.0481234
ASAH1	26.0061	30.8792	26.4588	22.9448	9.61264	15.9268	16.334	22.5175		51.2002	-0.678219	0.0526237	0.188569
ASAP1	52.0122	67.9341	45.7015	67.1954	57.6758	81.2268	88.9298	112.588		59.9128	0.552052	0.0266934	0.120278
ASAP2	61.3001	39.1136	50.5122	55.723	43.2569	31.8536	18.1489	39.8387		41.0957	-0.662604	0.0159313	0.0850962
ASAP3	131.888	125.575	139.51	140.946	88.9169	76.4488	96.1893	74.4811		100.896	-0.685721	0.000519994	0.00725618
ASB1	44.5819	47.348	50.5122	49.1674	38.4506	49.3732	32.6681	45.0351		36.9909	-0.197786	0.457415	0.682202
ASB13	42.7243	18.5275	16.8374	31.1393	28.8379	14.3341	19.9638	15.5891		18.6291	-0.533938	0.189962	0.421128
ASB16	13.0031	8.23444	9.62138	14.7502	4.80632	7.96341	10.8894	15.5891		6.1897	-0.208041	0.698733	0.849134
ASB3	33.4364	37.055	48.1069	60.6398	33.6442	41.4097	43.5574	51.9635		57.5294	-0.0672296	0.800771	0.902866
ASB6	48.297	37.055	62.5389	27.8615	28.8379	54.1512	70.7808	41.5708		43.7852	0.207818	0.441633	0.668352
ASB7	18.5758	22.6447	16.8374	8.19456	36.0474	23.8902	21.7787	24.2496		15.9694	0.680645	0.0779431	0.244359
ASB8	16.7182	14.4103	12.0267	9.83348	24.0316	14.3341	9.07447	24.2496		17.7334	0.415396	0.318746	0.559412
ASCC1	59.4425	39.1136	45.7015	40.9728	33.6442	54.1512	49.0021	50.2314		63.1076	0.0372332	0.880464	0.950228
ASCC2	74.3031	92.6375	62.5389	91.7791	103.336	92.3756	76.2255	142.034		91.5127	0.3551	0.0905873	0.268103
ASCC3	276.779	288.205	250.156	301.56	254.735	301.017	332.125	348.156		272.464	0.147675	0.410149	0.643591
ASDURF	0	0	2.40534	0	0	1.59268	1.81489	3.46424		2.85114	1.61103	0.224957	0.462803
ASF1A	57.5849	49.4066	50.5122	62.2787	60.079	87.5975	49.0021	90.0701		91.1015	0.388999	0.112399	0.305923
ASF1B	57.5849	43.2308	50.5122	32.7783	55.2727	44.5951	47.1872	27.7139		62.089	-0.0816933	0.772831	0.888553
ASGR1	7.43031	10.2931	24.0534	4.91674	7.20948	4.77805	5.44468	1.73212		7.88913	-1.25156	0.0455788	0.17071
ASH1L	191.331	191.451	175.59	217.975	204.269	172.01	208.713	242.496		110.588	0.0846387	0.595083	0.783071
ASH2L	133.746	160.572	146.726	136.03	136.98	159.268	125.228	128.177		172.064	-0.0623237	0.704126	0.851665
ASIC1	14.8606	8.23444	4.81069	8.19456	0	6.37073	0	3.46424		4.54742	-1.75956	0.0247199	0.114347
ASIC2	1.85758	12.3517	2.40534	4.91674	4.80632	4.77805	5.44468	3.46424		2.91207	-0.222679	0.775897	0.890081
ASIC3	3.71516	6.17583	4.81069	3.27783	0	0	3.62979	5.19635		1.73873	-0.962962	0.356485	0.59649
ASL	24.1485	20.5861	31.2695	24.5837	24.0316	9.55609	25.4085	13.8569		29.7628	-0.498307	0.16802	0.391296
ASNS	295.355	284.088	303.073	363.839	84.1106	81.2268	78.0404	95.2665		299.238	-1.88262	6.92154e-24	8.67339e-21
ASNSD1	139.318	109.106	64.9443	122.918	122.561	114.673	101.634	136.837		70.4906	0.108176	0.629222	0.803166
ASPH	68.7304	74.11	67.3496	80.3067	72.0948	86.0049	79.8553	69.2847		109.148	0.0800928	0.682499	0.838246
ASPHD1	22.2909	30.8792	21.6481	27.8615	24.0316	11.1488	19.9638	1.73212		13.8795	-0.909246	0.055889	0.196892
ASPHD2	20.4334	10.2931	31.2695	32.7783	16.8221	27.0756	16.334	13.8569		16.0352	-0.34323	0.364586	0.604257
ASPM	507.119	516.711	329.532	649.009	430.166	479.397	335.755	581.992		338.485	-0.134907	0.518586	0.730651
ASPSCR1	87.3062	63.8169	86.5924	67.1954	60.079	58.9293	99.8191	64.0884		61.9089	-0.0989108	0.665906	0.827085
ASRGL1	33.4364	37.055	52.9176	40.9728	52.8695	57.3366	74.4106	64.0884		55.9257	0.622132	0.00830961	0.0547237
ASS1	111.455	125.575	101.024	132.752	33.6442	47.7805	41.7425	39.8387		101.318	-1.52048	5.58569e-12	9.85835e-10
ASTE1	27.8637	22.6447	4.81069	11.4724	16.8221	28.6683	27.2234	19.0533		16.3775	0.454797	0.241455	0.482565
ASTN1	22.2909	20.5861	12.0267	19.667	2.40316	6.37073	7.25957	1.73212		11.755	-2.04352	0.000264456	0.00435467
ASTN2	44.5819	49.4066	50.5122	32.7783	19.2253	15.9268	18.1489	17.3212		26.9477	-1.32282	0.000177677	0.0032128
ASXL1	150.464	84.403	113.051	93.418	64.8853	62.1146	87.1149	79.6774		65.2384	-0.584118	0.010652	0.0648278
ASXL2	133.746	148.22	103.43	142.585	158.609	195.9	163.34	200.926		127.937	0.442907	0.00542208	0.041029
ATAD1	40.8667	32.9378	48.1069	70.4732	76.9011	87.5975	54.4468	58.892		101.42	0.511229	0.0491578	0.179538
ATAD2	143.034	170.865	101.024	127.835	177.834	210.234	117.968	199.194		137.332	0.37628	0.0484163	0.177867
ATAD2B	66.8728	47.348	57.7283	83.5845	55.2727	38.2244	52.6319	69.2847		49.4716	-0.267823	0.304945	0.546635
ATAD3A	113.312	76.1686	84.187	50.8063	108.142	140.156	156.081	107.391		92.2933	0.674484	0.000990607	0.0117591
ATAD3B	126.315	107.048	88.9977	83.5845	153.802	148.119	163.34	152.426		89.7235	0.604302	0.00308647	0.02684
ATAD5	128.173	158.513	127.483	201.586	141.786	173.602	96.1893	183.604		114.709	-0.0527917	0.800281	0.902706
ATCAY	22.2909	37.055	12.0267	29.5004	21.6284	12.7415	12.7043	17.3212		17.673	-0.703194	0.0638918	0.214129
ATE1	42.7243	30.8792	24.0534	44.2506	33.6442	39.8171	32.6681	32.9102		46.1309	-0.0509757	0.868366	0.943919
ATF1	42.7243	18.5275	31.2695	42.6117	36.0474	33.4463	25.4085	51.9635		49.4603	0.0980418	0.729419	0.866213
ATF2	53.8698	47.348	28.8641	49.1674	40.8537	55.7439	61.7064	58.892		55.4957	0.270374	0.274348	0.514417
ATF3	18.5758	10.2931	16.8374	16.3891	12.0158	4.77805	10.8894	17.3212		17.4421	-0.490319	0.270796	0.511929
ATF4	908.356	924.316	894.788	857.151	997.311	1040.02	803.998	945.736		524.586	0.0793829	0.61281	0.794118
ATF5	13.0031	20.5861	7.21603	1.63891	16.8221	22.2976	5.44468	17.3212		7.65618	0.566045	0.386793	0.62436
ATF6	52.0122	45.2894	38.4855	42.6117	38.4506	33.4463	39.9277	51.9635		62.2153	-0.12902	0.613437	0.794602
ATF7	3.71516	0	2.40534	1.63891	0	3.18536	3.62979	1.73212		3.70956	0.224752	0.831185	0.921652
ATF7IP	378.946	442.601	533.986	576.897	360.474	337.649	259.53	387.994		516.429	-0.522787	0.0176674	0.0907335
ATF7IP2	26.0061	12.3517	12.0267	14.7502	7.20948	15.9268	7.25957	31.1781		14.1962	-0.055099	0.900959	0.958479
ATG10	9.28789	6.17583	4.81069	6.55565	9.61264	1.59268	12.7043	3.46424		8.52912	-0.0555866	0.929858	0.968342
ATG101	68.7304	47.348	57.7283	50.8063	96.1264	65.3	79.8553	50.2314		74.9769	0.350475	0.107263	0.297172
ATG12	18.5758	28.8205	26.4588	32.7783	21.6284	28.6683	23.5936	25.9818		40.9167	-0.0853837	0.786679	0.895633
ATG13	72.4456	102.931	76.971	49.1674	84.1106	57.3366	67.1511	71.0168		65.0355	-0.107375	0.634259	0.806403
ATG14	68.7304	41.1722	48.1069	29.5004	45.66	38.2244	41.7425	41.5708		37.758	-0.164968	0.577887	0.771616
ATG16L1	53.8698	41.1722	31.2695	37.695	40.8537	33.4463	47.1872	43.3029		44.3632	-0.0113047	0.964854	0.982677
ATG16L2	16.7182	20.5861	21.6481	6.55565	4.80632	9.55609	7.25957	5.19635		7.32905	-1.21808	0.0269638	0.121088
ATG2A	122.6	90.5789	129.889	78.6678	93.7232	93.9683	166.97	112.588		83.038	0.16288	0.456798	0.681851
ATG2B	94.7365	41.1722	55.3229	59.0009	69.6916	81.2268	85.3	91.8022		59.036	0.38685	0.0857458	0.258973
ATG3	31.5788	39.1136	33.6748	52.4452	72.0948	66.8927	65.3362	55.4278		73.4277	0.701269	0.00516553	0.0394462
ATG4A	3.71516	8.23444	19.2428	3.27783	4.80632	11.1488	12.7043	8.66059		8.79793	0.25411	0.657529	0.821894
ATG4B	104.024	78.2272	149.131	109.807	81.7074	84.4122	108.894	95.2665		114.588	-0.238022	0.236075	0.475999
ATG4C	24.1485	32.9378	26.4588	39.3339	28.8379	33.4463	27.2234	45.0351		35.722	0.128036	0.687299	0.840986
ATG4D	89.1638	80.2858	74.5657	40.9728	81.7074	74.8561	74.4106	69.2847		51.0403	0.0836155	0.737465	0.870413
ATG5	42.7243	43.2308	24.0534	27.8615	36.0474	52.5585	41.7425	55.4278		50.9486	0.441282	0.134405	0.34175
ATG7	33.4364	45.2894	43.2962	52.4452	21.6284	27.0756	27.2234	19.0533		37.6092	-0.873871	0.00262929	0.0239043
ATG9A	131.888	135.868	182.806	116.363	134.577	101.932	141.562	102.195		102.036	-0.234791	0.207891	0.443691
ATG9B	1.85758	2.05861	0	8.19456	2.40316	1.59268	5.44468	0		1.52728	-0.46509	0.693698	0.845475
ATIC	358.513	349.964	307.884	331.06	427.763	406.134	433.76	412.244		583.782	0.315074	0.0161593	0.0858382
ATL1	5.57274	12.3517	2.40534	11.4724	4.80632	9.55609	5.44468	20.7854		8.2043	0.349856	0.544171	0.748687
ATL2	85.4486	109.106	84.187	106.529	110.545	117.859	105.264	95.2665		134.486	0.148463	0.442834	0.669299
ATL3	29.7213	45.2894	43.2962	60.6398	62.4822	54.1512	74.4106	76.2132		93.3595	0.564742	0.0160244	0.0854474
ATM	152.321	181.158	141.915	198.308	156.205	173.602	179.674	174.944		133.33	0.0205727	0.930007	0.968342
ATMIN	360.37	298.498	307.884	321.227	370.087	394.985	337.57	318.71		190.605	0.139534	0.301027	0.541893
ATN1	338.079	339.671	461.826	399.895	516.679	452.322	675.14	627.027		279.493	0.564127	0.000374421	0.0056312
ATOX1	22.2909	20.5861	12.0267	22.9448	21.6284	20.7049	16.334	12.1248		56.111	-0.185045	0.603979	0.788793
ATP10A	27.8637	22.6447	24.0534	19.667	9.61264	22.2976	10.8894	8.66059		10.6955	-0.831832	0.0539816	0.191953
ATP10D	7.43031	6.17583	14.4321	3.27783	14.419	6.37073	1.81489	1.73212		5.42931	-0.402238	0.554039	0.754653
ATP11A	167.182	179.099	235.724	249.115	307.605	254.829	344.83	316.978		192.664	0.556461	0.000581655	0.00791391
ATP11B	48.297	53.5239	72.1603	67.1954	45.66	47.7805	52.6319	55.4278		39.9999	-0.249704	0.328648	0.569848
ATP11C	230.34	259.385	175.59	283.532	288.379	286.683	212.343	329.102		240.569	0.226726	0.194874	0.426961
ATP12A	5.57274	2.05861	14.4321	6.55565	0	3.18536	1.81489	1.73212		4.23331	-1.95943	0.0608776	0.207298
ATP13A1	232.197	209.978	247.75	186.836	266.751	230.939	304.902	247.693		201.444	0.265268	0.0546547	0.193687
ATP13A2	284.21	228.506	303.073	229.448	237.913	195.9	274.049	204.39		175.187	-0.195672	0.26408	0.503428
ATP13A3	209.906	177.04	197.238	206.503	271.557	297.832	303.087	285.799		182.5	0.550688	0.000318272	0.00497911
ATP1A1	1179.56	1056.07	1024.68	1050.54	990.102	1024.09	1110.71	1089.5		1242.97	-0.0324898	0.797378	0.901126
ATP1A2	89.1638	90.5789	60.1336	50.8063	2.40316	14.3341	18.1489	13.8569		41.9663	-2.50867	9.76062e-12	1.65284e-09
ATP1B1	61.3001	61.7583	55.3229	91.7791	64.8853	86.0049	63.5213	55.4278		122.946	-0.0164586	0.937883	0.970831
ATP1B2	9.28789	20.5861	24.0534	22.9448	7.20948	9.55609	10.8894	10.3927		34.652	-0.98292	0.0259057	0.117788
ATP1B3	239.628	238.799	180.401	239.281	199.462	192.715	186.934	216.515		399.449	-0.183128	0.209558	0.445911
ATP2A1	3.71516	4.11722	21.6481	8.19456	7.20948	4.77805	19.9638	5.19635		6.99724	0.0423446	0.942406	0.972348
ATP2A2	891.638	856.382	817.817	703.094	848.316	893.495	947.374	869.523		919.412	0.124515	0.310857	0.551906
ATP2A3	100.309	74.11	101.024	52.4452	144.19	127.415	147.006	93.5343		83.8404	0.651739	0.00759992	0.0516838
ATP2B1	113.312	150.279	127.483	191.753	117.755	133.785	137.932	148.962		150.982	-0.118081	0.535944	0.742994
ATP2B2	3.71516	6.17583	9.62138	3.27783	0	1.59268	0	0		1.78865	-3.291	0.00932087	0.0594356
ATP2B4	57.5849	74.11	91.4031	114.724	74.498	63.7073	112.523	91.8022		84.2886	0.0165758	0.948613	0.975347
ATP2C1	146.749	133.81	134.699	152.419	158.609	154.49	134.302	190.533		158.985	0.165128	0.376866	0.616523
ATP5F1A	1474.92	1488.38	1695.77	1540.58	1951.37	2100.75	2083.5	2004.06		2235.82	0.394032	0.000531714	0.00737048
ATP5F1B	2204.95	2089.49	2321.16	2337.09	2910.23	2752.16	2903.83	2586.05		3077.17	0.316324	0.000562355	0.00768471
ATP5F1C	313.931	255.268	230.913	267.143	281.17	348.797	254.085	311.781		427.158	0.163612	0.278656	0.518769
ATP5F1D	148.606	125.575	230.913	86.8624	194.656	192.715	223.232	168.015		242.285	0.410874	0.0836804	0.254762
ATP5F1E	42.7243	53.5239	36.0802	44.2506	69.6916	66.8927	32.6681	62.3562		115.742	0.381502	0.193028	0.424654
ATP5IF1	117.027	148.22	115.457	149.141	117.755	141.749	103.449	138.569		199.021	-0.0789888	0.71014	0.854801
ATP5MC1	94.7365	69.9927	88.9977	55.723	144.19	130.6	123.413	119.516		219.043	0.748391	0.00184465	0.0186113
ATP5MC2	377.088	300.557	466.637	303.199	173.028	195.9	245.011	164.551		477.726	-0.886348	5.37277e-07	2.49356e-05
ATP5MC3	182.043	218.213	192.428	181.919	242.719	291.461	328.496	254.621		679.303	0.53311	0.0060865	0.0445763
ATP5MD	31.5788	47.348	19.2428	21.3059	31.2411	43.0024	36.2979	45.0351		144.598	0.398647	0.192178	0.423751
ATP5ME	91.0214	84.403	45.7015	88.5013	105.739	141.749	54.4468	121.248		225.425	0.441845	0.11618	0.312079
ATP5MF	113.312	96.7547	91.4031	109.807	132.174	111.488	147.006	119.516		195.362	0.296698	0.0994611	0.284251
ATP5MG	126.315	98.8133	67.3496	103.251	110.545	135.378	116.153	147.23		283.301	0.357132	0.090429	0.268103
ATP5MGL	0	0	2.40534	0	0	0	0	0		12.8959	-0.802662	0.635496	0.807074
ATP5MPL	33.4364	39.1136	16.8374	24.5837	52.8695	52.5585	39.9277	48.4993		116.89	0.75105	0.0073817	0.0505265
ATP5PB	308.358	265.561	206.86	273.698	379.699	393.393	281.308	436.494		471.186	0.493698	0.00147217	0.0158896
ATP5PD	141.176	113.224	139.51	172.086	182.64	186.344	141.562	181.872		451.868	0.280281	0.0757563	0.240267
ATP5PF	109.597	86.4616	88.9977	103.251	115.352	121.044	136.117	169.748		228.535	0.480528	0.0253552	0.11617
ATP5PO	74.3031	107.048	43.2962	83.5845	88.9169	87.5975	79.8553	114.32		134.592	0.252991	0.243059	0.483378
ATP6AP1	98.4517	109.106	127.483	68.8343	98.5296	130.6	139.747	112.588		150.6	0.285356	0.138013	0.347556
ATP6AP2	81.7335	104.989	86.5924	96.6958	165.818	162.454	186.934	169.748		225.389	0.886705	3.40287e-08	2.25616e-06
ATP6V0A1	50.1546	67.9341	69.755	49.1674	57.6758	82.8195	70.7808	77.9453		85.1917	0.323409	0.143422	0.355323
ATP6V0A2	117.027	100.872	110.646	81.9456	108.142	132.193	107.079	112.588		103.594	0.180716	0.312586	0.553798
ATP6V0A4	1.85758	8.23444	0	3.27783	7.20948	3.18536	1.81489	0		3.14191	-0.268563	0.773309	0.888796
ATP6V0B	89.1638	82.3444	105.835	67.1954	117.755	114.673	148.821	117.784		130.978	0.551225	0.00556143	0.0417307
ATP6V0C	130.031	86.4616	115.457	113.085	134.577	114.673	226.862	157.623		166.222	0.509208	0.0355272	0.14544
ATP6V0D1	98.4517	80.2858	79.3763	59.0009	105.739	121.044	119.783	103.927		128.125	0.520263	0.00414293	0.0335152
ATP6V0E1	9.28789	8.23444	9.62138	14.7502	14.419	27.0756	52.6319	29.446		50.5822	1.56086	5.93947e-05	0.00133144
ATP6V0E2	20.4334	18.5275	21.6481	18.028	50.4664	22.2976	41.7425	20.7854		26.3938	0.754138	0.0466363	0.173521
ATP6V1A	100.309	107.048	84.187	113.085	112.949	138.563	125.228	140.302		244.163	0.351688	0.0418255	0.161514
ATP6V1B2	118.885	115.282	74.5657	91.7791	148.996	101.932	114.338	103.927		136.419	0.20606	0.307801	0.54897
ATP6V1C1	40.8667	28.8205	33.6748	29.5004	31.2411	43.0024	23.5936	43.3029		66.6452	0.105179	0.718652	0.859133
ATP6V1D	46.4395	43.2308	40.8908	37.695	50.4664	57.3366	25.4085	50.2314		92.9884	0.128334	0.654096	0.820139
ATP6V1E1	42.7243	63.8169	38.4855	54.0841	45.66	60.5219	38.1128	60.6241		139.197	0.0469726	0.841773	0.9268
ATP6V1F	66.8728	74.11	48.1069	52.4452	88.9169	89.1902	67.1511	62.3562		106.401	0.34064	0.142555	0.354578
ATP6V1G1	89.1638	115.282	96.2138	95.0569	120.158	175.195	101.634	159.355		232.962	0.503382	0.0170837	0.0887294
ATP6V1H	59.4425	61.7583	74.5657	59.0009	84.1106	62.1146	68.9659	74.4811		116.113	0.183293	0.394565	0.630885
ATP7A	5.57274	6.17583	2.40534	9.83348	7.20948	20.7049	14.5191	22.5175		12.693	1.41439	0.0139892	0.0783371
ATP7B	40.8667	32.9378	38.4855	34.4172	45.66	23.8902	47.1872	38.1066		31.3141	0.0560114	0.841688	0.9268
ATP8A1	40.8667	30.8792	57.7283	59.0009	12.0158	12.7415	12.7043	13.8569		28.8711	-1.87297	5.8933e-07	2.68541e-05
ATP8A2	22.2909	12.3517	12.0267	19.667	0	9.55609	3.62979	6.92847		11.0279	-1.63274	0.00315944	0.0273796
ATP8B1	13.0031	18.5275	16.8374	11.4724	26.4348	19.1122	18.1489	25.9818		13.8118	0.591654	0.186138	0.415922
ATP8B2	154.179	146.161	168.374	114.724	201.865	157.676	179.674	145.498		87.2466	0.231931	0.186816	0.416918
ATP8B3	13.0031	6.17583	19.2428	9.83348	0	3.18536	0	0		5.66354	-3.67904	0.000691289	0.00890292
ATP9A	31.5788	37.055	43.2962	21.3059	19.2253	19.1122	14.5191	17.3212		20.6155	-0.899501	0.0122782	0.0718962
ATP9B	29.7213	28.8205	28.8641	32.7783	33.6442	30.261	27.2234	32.9102		30.3123	0.032506	0.912669	0.961995
ATPAF1	118.885	96.7547	122.673	96.6958	112.949	111.488	98.0042	102.195		104.543	-0.0303492	0.870266	0.945164
ATPAF2	1.85758	2.05861	4.81069	6.55565	16.8221	9.55609	7.25957	6.92847		7.64853	1.3386	0.0525968	0.188527
ATPSCKMT	9.28789	12.3517	12.0267	8.19456	7.20948	12.7415	5.44468	13.8569		14.6484	-0.0322331	0.948307	0.975198
ATR	133.746	144.103	122.673	142.585	36.0474	57.3366	36.2979	50.2314		75.8822	-1.57521	3.6353e-12	6.69911e-10
ATRAID	198.761	232.623	230.913	214.698	197.059	136.971	197.823	131.641		188.165	-0.410977	0.0220451	0.106061
ATRIP	50.1546	47.348	43.2962	42.6117	48.0632	63.7073	47.1872	36.3745		43.423	0.0975007	0.709589	0.854428
ATRN	100.309	94.6961	120.267	116.363	81.7074	97.1536	94.3745	79.6774		102.89	-0.283268	0.14291	0.354659
ATRNL1	20.4334	30.8792	40.8908	36.0561	76.9011	87.5975	61.7064	103.927		41.6774	1.38186	5.26268e-07	2.45155e-05
ATRX	338.079	436.425	257.372	452.34	396.521	385.429	246.825	471.136		290.236	0.0115544	0.959213	0.980017
ATXN1	3.71516	10.2931	2.40534	8.19456	16.8221	17.5195	19.9638	12.1248		6.3063	1.39677	0.0137617	0.0775048
ATXN10	287.925	333.495	295.857	339.255	281.17	264.385	245.011	219.979		377.011	-0.322257	0.0121653	0.0714987
ATXN1L	117.027	76.1686	74.5657	83.5845	122.561	124.229	114.338	124.712		63.3078	0.459599	0.028018	0.12442
ATXN2	169.04	117.341	168.374	124.557	112.949	109.895	134.302	159.355		192.462	-0.157039	0.444138	0.670137
ATXN2L	473.683	452.894	610.957	465.451	511.873	463.471	607.989	611.438		516.527	0.135394	0.41014	0.643591
ATXN3	22.2909	26.7619	19.2428	18.028	7.20948	19.1122	19.9638	20.7854		32.0794	-0.30566	0.387188	0.624676
ATXN7L1	92.8789	86.4616	96.2138	86.8624	151.399	114.673	137.932	102.195		76.8937	0.471623	0.0106053	0.0646689
ATXN7L2	27.8637	26.7619	14.4321	19.667	33.6442	28.6683	45.3723	38.1066		21.6524	0.705899	0.074837	0.238439
ATXN7L3	109.597	84.403	101.024	81.9456	98.5296	100.339	85.3	83.1416		56.017	-0.0351702	0.861057	0.938987
ATXN7L3B	53.8698	47.348	79.3763	77.0289	38.4506	60.5219	67.1511	53.6956		90.3547	-0.206792	0.378218	0.61768
AUH	26.0061	37.055	19.2428	49.1674	31.2411	22.2976	10.8894	27.7139		34.1759	-0.57067	0.083357	0.254271
AUNIP	26.0061	47.348	31.2695	37.695	31.2411	39.8171	25.4085	55.4278		36.1114	0.107606	0.732887	0.867811
AUP1	124.458	123.517	129.889	81.9456	132.174	125.822	185.119	142.034		116.555	0.361751	0.059236	0.203869
AURKA	104.024	125.575	81.7817	103.251	127.367	144.934	165.155	166.283		194.828	0.542904	0.00188544	0.0189012
AURKAIP1	362.228	337.612	303.073	280.254	483.035	466.656	499.096	413.976		403.542	0.537211	0.000736744	0.00935374
AURKB	239.628	195.568	214.076	188.475	192.253	173.602	168.785	145.498		257.011	-0.306747	0.0265746	0.119916
AURKC	0	2.05861	4.81069	1.63891	16.8221	9.55609	12.7043	6.92847		7.88753	2.50997	0.00243009	0.0226574
AUTS2	341.794	391.136	310.289	322.866	346.055	361.539	377.498	316.978		223.088	0.0374953	0.821875	0.91621
AVEN	35.294	26.7619	19.2428	50.8063	14.419	15.9268	5.44468	22.5175		25.6112	-1.2094	0.00111087	0.0128416
AVL9	74.3031	74.11	62.5389	68.8343	81.7074	68.4853	103.449	81.4095		72.9507	0.251871	0.223647	0.461623
AVPI1	5.57274	4.11722	2.40534	16.3891	4.80632	6.37073	9.07447	6.92847		9.69983	-0.153788	0.791728	0.898328
AXIN1	172.755	195.568	187.617	175.364	225.897	219.79	201.453	192.265		127.627	0.199197	0.161576	0.382236
AXIN2	107.74	74.11	98.6191	104.89	93.7232	138.563	125.228	133.373		78.1766	0.356331	0.0955116	0.276869
AXL	76.1607	109.106	57.7283	67.1954	36.0474	33.4463	38.1128	31.1781		47.777	-1.16654	7.82846e-06	0.000242818
AZI2	42.7243	39.1136	28.8641	54.0841	31.2411	38.2244	38.1128	57.1599		25.9301	-0.00901884	0.976569	0.988401
AZIN1	304.643	339.671	298.263	303.199	398.925	423.654	397.462	459.011		268.637	0.431934	0.0100867	0.0625416
B3GALNT1	5.57274	2.05861	2.40534	4.91674	14.419	7.96341	7.25957	5.19635		5.95496	1.11557	0.10721	0.297113
B3GALNT2	40.8667	59.6997	50.5122	39.3339	28.8379	41.4097	45.3723	34.6424		37.4198	-0.312787	0.27102	0.511929
B3GALT1	16.7182	22.6447	19.2428	31.1393	38.4506	28.6683	21.7787	25.9818		26.6117	0.313834	0.368329	0.607867
B3GALT5	35.294	41.1722	43.2962	47.5285	43.2569	38.2244	27.2234	31.1781		30.3307	-0.274063	0.333803	0.574808
B3GALT6	91.0214	96.7547	153.942	86.8624	84.1106	78.0414	123.413	79.6774		60.1497	-0.219796	0.446823	0.67255
B3GAT1	65.0153	43.2308	79.3763	42.6117	31.2411	38.2244	27.2234	25.9818		25.0715	-0.892742	0.0115732	0.0688951
B3GAT2	13.0031	14.4103	12.0267	8.19456	2.40316	1.59268	5.44468	3.46424		4.89826	-1.87138	0.00997169	0.0622485
B3GAT3	59.4425	45.2894	57.7283	59.0009	45.66	44.5951	32.6681	36.3745		45.6159	-0.483971	0.0886263	0.264423
B3GLCT	11.1455	6.17583	14.4321	11.4724	2.40316	11.1488	5.44468	8.66059		12.3545	-0.563165	0.306442	0.54748
B3GNT10	14.8606	8.23444	9.62138	14.7502	9.61264	11.1488	10.8894	10.3927		9.91759	-0.19233	0.717675	0.858655
B3GNT2	87.3062	74.11	79.3763	63.9176	115.352	92.3756	87.1149	86.6059		82.4145	0.316625	0.101083	0.286902
B3GNT4	5.57274	0	2.40534	4.91674	4.80632	3.18536	0	1.73212		2.96125	-0.537067	0.574451	0.769558
B3GNT5	18.5758	22.6447	19.2428	24.5837	14.419	12.7415	16.334	12.1248		12.3072	-0.629183	0.119504	0.317807
B3GNT7	295.355	236.74	392.071	239.281	173.028	258.015	379.313	310.049		288.402	-0.0442434	0.845628	0.928909
B3GNT8	0	0	7.21603	9.83348	2.40316	6.37073	5.44468	8.66059		3.60942	0.442779	0.562775	0.760912
B3GNT9	24.1485	18.5275	43.2962	31.1393	16.8221	15.9268	16.334	19.0533		15.2032	-0.765237	0.0426184	0.163269
B4GALNT3	65.0153	61.7583	108.24	77.0289	31.2411	35.039	68.9659	32.9102		41.7515	-0.871113	0.000987467	0.0117591
B4GALNT4	219.194	181.158	315.1	183.558	197.059	135.378	183.304	145.498		103.294	-0.442569	0.0300249	0.130188
B4GALT1	42.7243	45.2894	52.9176	29.5004	38.4506	25.4829	34.483	29.446		38.6675	-0.410402	0.139687	0.350503
B4GALT2	167.182	172.923	151.537	154.058	88.9169	86.0049	88.9298	88.338		66.6114	-0.875991	7.75998e-06	0.000241913
B4GALT3	55.7274	76.1686	57.7283	47.5285	55.2727	52.5585	65.3362	50.2314		39.6907	-0.0775333	0.742502	0.87356
B4GALT4	46.4395	57.6411	52.9176	59.0009	48.0632	43.0024	32.6681	51.9635		65.5841	-0.305482	0.203193	0.437119
B4GALT5	115.17	107.048	84.187	103.251	163.415	149.712	156.081	164.551		128.244	0.616937	0.000137536	0.00262323
B4GALT6	39.0092	45.2894	38.4855	42.6117	45.66	62.1146	59.8915	55.4278		32.5922	0.442337	0.0873664	0.262213
B4GALT7	50.1546	55.5825	40.8908	36.0561	52.8695	52.5585	67.1511	32.9102		33.759	0.169869	0.593108	0.781767
B4GAT1	98.4517	90.5789	132.294	67.1954	88.9169	65.3	105.264	60.6241		87.4049	-0.270766	0.225751	0.463872
B9D1	14.8606	18.5275	21.6481	18.028	14.419	12.7415	12.7043	10.3927		24.74	-0.539261	0.180236	0.408859
B9D2	14.8606	6.17583	0	6.55565	4.80632	6.37073	5.44468	5.19635		6.14846	-0.388335	0.555123	0.755307
BABAM1	85.4486	69.9927	69.755	96.6958	93.7232	93.9683	90.7447	84.8738		86.5912	0.160085	0.464166	0.688258
BABAM2	29.7213	24.7033	43.2962	26.2226	50.4664	35.039	25.4085	31.1781		55.0759	0.192984	0.507366	0.721428
BACE1	18.5758	12.3517	16.8374	21.3059	14.419	15.9268	14.5191	19.0533		10.5677	-0.118783	0.782513	0.893999
BACE2	31.5788	32.9378	57.7283	40.9728	7.20948	7.96341	10.8894	6.92847		20.5402	-2.2854	2.27716e-07	1.18896e-05
BACH1	98.4517	104.989	98.6191	109.807	74.498	97.1536	108.894	110.856		87.451	-0.0632188	0.742691	0.873619
BACH2	7.43031	2.05861	12.0267	8.19456	7.20948	6.37073	7.25957	8.66059		5.77551	0.00372003	0.995703	0.997774
BAD	46.4395	37.055	40.8908	14.7502	60.079	43.0024	27.2234	31.1781		29.5222	0.214455	0.539885	0.745898
BAG1	87.3062	55.5825	40.8908	70.4732	55.2727	46.1878	34.483	38.1066		41.767	-0.568338	0.104466	0.292594
BAG2	31.5788	28.8205	48.1069	39.3339	33.6442	39.8171	34.483	36.3745		60.5037	-0.014706	0.957116	0.979151
BAG3	59.4425	45.2894	72.1603	50.8063	74.498	39.8171	70.7808	43.3029		71.505	-0.00650381	0.98219	0.990569
BAG4	85.4486	76.1686	55.3229	80.3067	88.9169	130.6	72.5957	81.4095		100.144	0.325328	0.129863	0.334907
BAG5	83.591	72.0514	84.187	96.6958	132.174	111.488	103.449	110.856		93.2675	0.427347	0.0215184	0.104111
BAG6	5.57274	16.4689	9.62138	6.55565	14.419	4.77805	1.81489	15.5891		7.88922	-0.0697758	0.941501	0.971881
BAHCC1	118.885	102.931	315.1	175.364	105.739	79.6341	148.821	126.445		82.4694	-0.62203	0.0486096	0.178264
BAHD1	208.049	166.747	194.833	139.308	173.028	194.307	257.715	180.14		161.155	0.1922	0.307198	0.548517
BAIAP2	27.8637	34.9964	33.6748	34.4172	40.8537	28.6683	45.3723	39.8387		34.9049	0.231678	0.431418	0.66057
BAIAP2L1	53.8698	67.9341	74.5657	63.9176	55.2727	60.5219	36.2979	38.1066		63.4478	-0.446359	0.0528548	0.189076
BAIAP2L2	7.43031	4.11722	12.0267	3.27783	7.20948	6.37073	14.5191	5.19635		7.59322	0.370271	0.54329	0.748045
BAIAP3	14.8606	12.3517	28.8641	16.3891	19.2253	4.77805	7.25957	12.1248		11.7413	-0.779277	0.132326	0.339095
BAK1	40.8667	43.2308	21.6481	22.9448	55.2727	86.0049	63.5213	74.4811		57.9907	1.12868	0.000126993	0.00244823
BAMBI	40.8667	37.055	57.7283	40.9728	38.4506	43.0024	92.5596	62.3562		49.8997	0.445806	0.107543	0.297487
BANF1	100.309	121.458	175.59	124.557	136.98	146.527	125.228	86.6059		256.808	-0.0627342	0.721031	0.860601
BANP	22.2909	18.5275	62.5389	21.3059	28.8379	20.7049	32.6681	48.4993		34.65	0.111313	0.773781	0.889035
BAP1	174.612	170.865	170.779	165.53	204.269	164.046	201.453	169.748		119.72	0.112515	0.553764	0.754653
BARD1	74.3031	76.1686	67.3496	75.39	72.0948	98.7463	65.3362	71.0168		85.1117	0.0739019	0.717629	0.858655
BARX1	7.43031	16.4689	26.4588	16.3891	0	1.59268	5.44468	1.73212		5.44833	-2.84443	0.000503981	0.0070563
BASP1	317.646	277.912	305.479	204.864	302.798	262.793	281.308	247.693		301.031	-0.0130446	0.939389	0.971485
BAX	185.758	137.927	240.534	113.085	122.561	156.083	159.711	154.158		177.093	-0.171269	0.391598	0.628553
BAZ1A	144.891	144.103	110.646	131.113	122.561	95.5609	110.708	142.034		116.433	-0.181329	0.363242	0.602886
BAZ1B	349.225	446.718	305.479	393.339	485.438	547.883	466.428	644.348		442.043	0.519908	0.000189046	0.00335068
BAZ2A	531.267	465.246	613.363	449.062	540.711	581.329	624.323	588.92		416.382	0.18794	0.151292	0.366203
BAZ2B	152.321	125.575	76.971	124.557	127.367	197.493	110.708	143.766		89.5153	0.269884	0.212527	0.449849
BBC3	13.0031	10.2931	19.2428	6.55565	16.8221	3.18536	10.8894	1.73212		11.2301	-0.65102	0.262386	0.502002
BBIP1	9.28789	0	2.40534	9.83348	2.40316	0	1.81489	1.73212		6.67468	-2.05125	0.0368758	0.148918
BBS10	50.1546	74.11	45.7015	52.4452	38.4506	39.8171	21.7787	34.6424		39.1249	-0.727403	0.00726679	0.0499934
BBS12	13.0031	8.23444	9.62138	6.55565	9.61264	4.77805	1.81489	10.3927		7.24493	-0.519273	0.382617	0.620619
BBS2	37.1516	47.348	36.0802	55.723	26.4348	27.0756	19.9638	31.1781		39.3095	-0.764289	0.0136608	0.0771789
BBS4	48.297	61.7583	45.7015	59.0009	72.0948	60.5219	67.1511	58.892		79.7031	0.250413	0.278946	0.519078
BBS7	18.5758	16.4689	16.8374	26.2226	14.419	9.55609	19.9638	22.5175		31.9419	-0.261878	0.480072	0.700731
BBS9	31.5788	22.6447	31.2695	32.7783	33.6442	28.6683	27.2234	36.3745		27.8278	0.078965	0.800165	0.902706
BBX	81.7335	115.282	113.051	145.863	81.7074	82.8195	76.2255	100.463		94.0641	-0.420733	0.0447533	0.168663
BCAM	146.749	121.458	197.238	127.835	91.3201	79.6341	78.0404	71.0168		100.076	-0.888199	5.84956e-05	0.00131599
BCAN	13.0031	4.11722	7.21603	11.4724	9.61264	4.77805	7.25957	10.3927		7.69696	-0.225167	0.682009	0.838033
BCAP29	18.5758	12.3517	19.2428	16.3891	12.0158	23.8902	10.8894	19.0533		27.6782	0.0226438	0.9563	0.978866
BCAP31	120.743	113.224	110.646	101.613	124.964	140.156	136.117	133.373		235.24	0.268972	0.0866722	0.260891
BCAR1	360.37	290.264	394.476	237.642	401.328	324.907	348.46	251.157		253.161	0.0483945	0.794951	0.899684
BCAR3	37.1516	57.6411	72.1603	40.9728	26.4348	46.1878	65.3362	55.4278		46.1105	-0.0566174	0.840825	0.926302
BCAS2	29.7213	34.9964	14.4321	70.4732	55.2727	55.7439	12.7043	41.5708		104.36	0.112356	0.800437	0.902706
BCAS3	22.2909	47.348	69.755	37.695	24.0316	35.039	21.7787	32.9102		43.5868	-0.581565	0.0518134	0.186624
BCAS4	42.7243	61.7583	67.3496	72.1122	16.8221	30.261	16.334	20.7854		42.9867	-1.50802	6.96204e-06	0.000223124
BCAT1	373.373	430.25	315.1	404.811	213.881	251.644	226.862	216.515		436.674	-0.745393	1.57097e-07	8.48525e-06
BCAT2	55.7274	43.2308	50.5122	54.0841	38.4506	33.4463	21.7787	15.5891		39.9212	-0.92962	0.00107366	0.012497
BCCIP	102.167	139.985	81.7817	132.752	161.012	207.049	141.562	150.694		208.855	0.526312	0.0164455	0.0866371
BCDIN3D	11.1455	10.2931	9.62138	4.91674	0	4.77805	7.25957	3.46424		5.76128	-1.1091	0.0988067	0.282876
BCHE	7.43031	14.4103	7.21603	4.91674	2.40316	0	3.62979	0		8.75389	-2.58891	0.00656095	0.047007
BCKDHA	5.57274	4.11722	4.81069	8.19456	2.40316	7.96341	3.62979	3.46424		7.38053	-0.34951	0.608885	0.791241
BCKDHB	46.4395	51.4653	28.8641	27.8615	36.0474	27.0756	29.0383	25.9818		53.0881	-0.406294	0.166253	0.388895
BCKDK	104.024	102.931	156.347	106.529	151.399	124.229	157.896	117.784		124.953	0.238586	0.184687	0.414529
BCL10	16.7182	24.7033	31.2695	31.1393	21.6284	31.8536	36.2979	34.6424		49.3495	0.288929	0.350223	0.590585
BCL11A	59.4425	55.5825	64.9443	50.8063	76.9011	74.8561	68.9659	102.195		54.1945	0.497556	0.0279059	0.124091
BCL11B	37.1516	39.1136	26.4588	14.7502	69.6916	46.1878	74.4106	69.2847		27.7444	1.15106	0.000600183	0.00805048
BCL2L1	72.4456	69.9927	72.1603	55.723	81.7074	92.3756	99.8191	67.5526		59.3761	0.349335	0.099771	0.284855
BCL2L11	1.85758	6.17583	12.0267	11.4724	4.80632	4.77805	7.25957	10.3927		7.52765	-0.181969	0.764879	0.88485
BCL2L12	267.491	201.744	190.022	181.919	197.059	151.305	192.379	169.748		164.953	-0.250344	0.198734	0.431003
BCL2L13	87.3062	84.403	81.7817	54.0841	72.0948	93.9683	96.1893	77.9453		76.4027	0.170022	0.407912	0.641784
BCL3	7.43031	0	9.62138	4.91674	0	0	0	3.46424		2.45018	-2.543	0.0323276	0.13695
BCL6	16.7182	18.5275	19.2428	14.7502	7.20948	6.37073	9.07447	15.5891		11.695	-0.831424	0.087624	0.262432
BCL6B	27.8637	20.5861	31.2695	21.3059	7.20948	12.7415	3.62979	15.5891		13.2569	-1.31571	0.00277963	0.024951
BCL7A	22.2909	4.11722	14.4321	9.83348	26.4348	12.7415	14.5191	15.5891		18.1136	0.405073	0.357043	0.596787
BCL7B	20.4334	20.5861	7.21603	4.91674	24.0316	23.8902	30.8532	29.446		23.4456	1.03619	0.0127232	0.0734723
BCL7C	57.5849	49.4066	67.3496	54.0841	21.6284	19.1122	23.5936	24.2496		28.9426	-1.36295	0.00012455	0.00242727
BCL9	248.916	259.385	235.724	224.531	209.075	258.015	208.713	230.372		165.073	-0.0876044	0.515131	0.727418
BCL9L	300.928	282.03	266.993	196.67	307.605	248.458	390.202	282.335		194.648	0.232978	0.187851	0.418407
BCLAF1	594.425	619.642	322.316	527.73	632.031	700.78	455.538	807.167		587.582	0.328454	0.115198	0.310574
BCLAF3	24.1485	16.4689	19.2428	19.667	24.0316	14.3341	19.9638	13.8569		16.7396	-0.176362	0.660358	0.82387
BCOR	341.794	354.081	300.668	391.7	540.711	528.771	459.168	491.921		280.875	0.53747	0.00228338	0.021842
BCORL1	40.8667	49.4066	72.1603	85.2235	57.6758	43.0024	103.449	64.0884		60.5652	0.111449	0.713649	0.857307
BCR	533.125	545.532	493.096	452.34	574.355	500.102	595.285	413.976		316.211	0.0395236	0.765735	0.885024
BCS1L	50.1546	49.4066	48.1069	34.4172	55.2727	58.9293	74.4106	67.5526		46.1701	0.512245	0.0346715	0.143106
BDH2	35.294	26.7619	45.7015	36.0561	28.8379	39.8171	32.6681	24.2496		71.6478	-0.173038	0.548233	0.750973
BDNF	9.28789	10.2931	9.62138	6.55565	4.80632	4.77805	1.81489	8.66059		6.22778	-0.804329	0.200869	0.433831
BECN1	57.5849	69.9927	45.7015	63.9176	69.6916	79.6341	61.7064	114.32		55.0987	0.455521	0.0419628	0.161547
BEGAIN	11.1455	6.17583	4.81069	1.63891	7.20948	4.77805	7.25957	5.19635		3.25179	0.0325486	0.964442	0.982646
BEND3	274.922	230.564	334.343	204.864	233.107	208.641	306.717	225.175		178.649	-0.0953961	0.618851	0.797888
BEND4	68.7304	67.9341	76.971	65.5565	76.9011	87.5975	85.3	67.5526		53.4545	0.193482	0.400369	0.635871
BEND5	22.2909	20.5861	14.4321	21.3059	19.2253	17.5195	25.4085	29.446		16.2697	0.208488	0.577119	0.771307
BEND7	3.71516	12.3517	16.8374	6.55565	2.40316	1.59268	12.7043	6.92847		5.39776	-0.674666	0.317614	0.557973
BEST2	1.85758	2.05861	9.62138	6.55565	0	1.59268	0	1.73212		3.47475	-2.40767	0.0382927	0.153139
BEST4	0	0	7.21603	3.27783	2.40316	1.59268	1.81489	0		2.61183	-0.831699	0.476676	0.697685
BET1	14.8606	12.3517	9.62138	11.4724	4.80632	1.59268	3.62979	5.19635		22.5056	-1.72079	0.00605153	0.044406
BET1L	7.43031	16.4689	14.4321	6.55565	12.0158	17.5195	14.5191	13.8569		14.5021	0.434076	0.353029	0.592765
BEX1	35.294	26.7619	28.8641	13.1113	28.8379	11.1488	21.7787	13.8569		40.6608	-0.484259	0.280294	0.520582
BEX2	24.1485	34.9964	9.62138	6.55565	26.4348	19.1122	16.334	13.8569		29.7987	-0.00848898	0.982801	0.990968
BEX3	195.046	193.509	144.321	216.336	307.605	296.239	228.677	327.37		484.243	0.622835	0.00188026	0.0188643
BEX4	33.4364	30.8792	16.8374	44.2506	57.6758	50.9658	27.2234	62.3562		81.6859	0.611522	0.0284562	0.12562
BEX5	1.85758	4.11722	0	0	7.20948	1.59268	1.81489	0		3.05878	0.685793	0.54964	0.751657
BFSP1	11.1455	12.3517	12.0267	4.91674	4.80632	9.55609	3.62979	6.92847		6.74298	-0.627167	0.290069	0.529992
BGN	3.71516	8.23444	14.4321	6.55565	0	6.37073	1.81489	1.73212		8.68567	-1.53078	0.0411917	0.159848
BHLHE23	1.85758	0	4.81069	3.27783	4.80632	6.37073	5.44468	10.3927		3.19545	1.48561	0.0927081	0.272067
BHLHE40	7.43031	0	7.21603	4.91674	7.20948	6.37073	5.44468	10.3927		12.7499	0.593939	0.41465	0.647328
BHLHE41	1.85758	6.17583	16.8374	9.83348	2.40316	0	3.62979	3.46424		4.22008	-1.86499	0.0285358	0.125777
BICC1	5.57274	2.05861	2.40534	0	0	3.18536	5.44468	3.46424		1.91009	0.35632	0.734581	0.868727
BICD1	78.0183	69.9927	52.9176	114.724	98.5296	101.932	63.5213	117.784		77.2401	0.248961	0.260749	0.500735
BICD2	124.458	104.989	141.915	98.3348	117.755	125.822	110.708	100.463		99.185	-0.0341285	0.846565	0.928949
BICDL1	39.0092	41.1722	36.0802	27.8615	16.8221	28.6683	34.483	22.5175		16.96	-0.461954	0.180669	0.409201
BICDL2	24.1485	22.6447	45.7015	16.3891	38.4506	15.9268	27.2234	27.7139		20.0314	0.0150985	0.967114	0.983656
BICRA	169.04	135.868	197.238	99.9737	187.446	141.749	161.526	129.909		99.8574	0.0481813	0.812861	0.910436
BICRAL	66.8728	43.2308	45.7015	55.723	57.6758	58.9293	54.4468	43.3029		35.6972	0.0020907	0.993219	0.996879
BID	65.0153	41.1722	36.0802	36.0561	36.0474	39.8171	30.8532	25.9818		47.2641	-0.435075	0.121364	0.32114
BIK	0	0	7.21603	1.63891	0	1.59268	0	1.73212		2.86136	-1.11214	0.399655	0.635301
BIN1	27.8637	22.6447	33.6748	26.2226	24.0316	20.7049	9.07447	22.5175		24.6636	-0.534676	0.113583	0.307941
BIN3	14.8606	32.9378	24.0534	13.1113	19.2253	15.9268	14.5191	12.1248		24.8642	-0.440838	0.24633	0.486565
BIRC2	53.8698	80.2858	50.5122	50.8063	72.0948	62.1146	70.7808	58.892		57.4907	0.160967	0.519959	0.73168
BIRC5	107.74	84.403	115.457	104.89	115.352	129.007	101.634	95.2665		185.694	0.0994385	0.621658	0.798974
BIRC6	609.286	613.466	582.093	645.732	708.932	753.339	691.474	841.809		535.062	0.289624	0.0555191	0.19603
BLCAP	26.0061	28.8205	26.4588	40.9728	38.4506	23.8902	43.5574	38.1066		33.9444	0.202879	0.508202	0.722027
BLM	176.47	230.564	146.726	201.586	136.98	173.602	105.264	183.604		147.612	-0.331532	0.0807477	0.249716
BLMH	111.455	111.165	105.835	104.89	136.98	109.895	123.413	90.0701		157.587	0.0728442	0.672641	0.83142
BLOC1S1	13.0031	4.11722	12.0267	18.028	16.8221	17.5195	9.07447	10.3927		17.1326	0.142522	0.75011	0.877623
BLOC1S2	22.2909	37.055	33.6748	21.3059	43.2569	27.0756	18.1489	31.1781		41.7652	0.061136	0.846305	0.928949
BLOC1S3	5.57274	12.3517	14.4321	1.63891	14.419	9.55609	16.334	5.19635		7.22472	0.47663	0.413195	0.646088
BLOC1S4	61.3001	65.8755	69.755	59.0009	60.079	79.6341	88.9298	51.9635		66.1719	0.148045	0.535771	0.742878
BLOC1S5	3.71516	4.11722	9.62138	4.91674	0	7.96341	5.44468	5.19635		10.1733	-0.105425	0.873889	0.946883
BLOC1S6	9.28789	12.3517	9.62138	18.028	19.2253	12.7415	12.7043	32.9102		26.5951	0.618803	0.135907	0.343912
BLVRA	29.7213	30.8792	28.8641	29.5004	9.61264	28.6683	19.9638	19.0533		40.858	-0.564776	0.0752078	0.239255
BLVRB	13.0031	47.348	43.2962	31.1393	19.2253	19.1122	18.1489	17.3212		41.0756	-0.843034	0.0149368	0.0815582
BLZF1	5.57274	12.3517	24.0534	24.5837	24.0316	14.3341	16.334	19.0533		21.731	0.126651	0.755585	0.88093
BMF	13.0031	12.3517	4.81069	19.667	9.61264	15.9268	1.81489	10.3927		13.6979	-0.430813	0.399975	0.635488
BMP1	13.0031	28.8205	33.6748	14.7502	9.61264	23.8902	21.7787	10.3927		16.7634	-0.376593	0.3478	0.589036
BMP2	16.7182	20.5861	28.8641	19.667	31.2411	22.2976	52.6319	41.5708		19.4023	0.803636	0.0314012	0.134205
BMP2K	55.7274	63.8169	40.8908	70.4732	91.3201	90.7829	99.8191	116.052		63.6057	0.767355	0.000298618	0.00477904
BMP4	7.43031	18.5275	24.0534	31.1393	9.61264	9.55609	16.334	15.5891		11.8609	-0.663063	0.149917	0.364778
BMP7	68.7304	63.8169	108.24	91.7791	55.2727	44.5951	45.3723	36.3745		51.3472	-0.880924	0.000657905	0.0086044
BMPER	1.85758	0	9.62138	0	2.40316	0	3.62979	3.46424		3.22399	-0.162201	0.890386	0.953571
BMPR1A	202.476	154.396	170.779	211.42	182.64	245.273	241.381	221.711		204.06	0.269979	0.0748713	0.238488
BMPR2	48.297	57.6411	60.1336	91.7791	50.4664	71.6707	88.9298	102.195		49.0606	0.282369	0.305149	0.546772
BMS1	304.643	333.495	264.588	355.644	365.28	399.763	297.643	379.334		325.369	0.192083	0.185061	0.414922
BMT2	9.28789	6.17583	2.40534	4.91674	2.40316	6.37073	3.62979	8.66059		4.1005	-0.0918248	0.896053	0.956989
BNC2	94.7365	67.9341	88.9977	126.196	163.415	148.119	137.932	143.766		112.284	0.62556	0.000284935	0.00461307
BNIP1	7.43031	10.2931	4.81069	8.19456	9.61264	4.77805	14.5191	13.8569		13.0641	0.446477	0.386119	0.623914
BNIP2	33.4364	34.9964	24.0534	42.6117	50.4664	35.039	25.4085	51.9635		49.4896	0.23834	0.470766	0.693741
BNIP3	325.076	500.242	762.494	699.816	800.252	616.368	929.225	750.007		643.103	0.436845	0.171451	0.396979
BNIP3L	27.8637	49.4066	60.1336	39.3339	26.4348	44.5951	72.5957	50.2314		83.8409	0.18881	0.458358	0.682634
BOC	18.5758	24.7033	9.62138	13.1113	7.20948	0	5.44468	10.3927		7.46835	-1.56872	0.00807364	0.0539578
BOD1	118.885	131.751	79.3763	109.807	84.1106	98.7463	96.1893	114.32		102.479	-0.161299	0.397921	0.633669
BOD1L1	312.073	438.484	269.399	398.256	442.181	546.29	341.2	562.938		277.911	0.415287	0.0389787	0.154682
BOK	102.167	63.8169	62.5389	68.8343	40.8537	52.5585	79.8553	48.4993		40.7333	-0.419916	0.134355	0.34171
BOLA1	13.0031	16.4689	14.4321	11.4724	12.0158	12.7415	16.334	10.3927		14.6339	-0.0898985	0.845114	0.928765
BOLA2	74.3031	90.5789	84.187	73.7511	62.4822	55.7439	83.4851	27.7139		37.9028	-0.496272	0.0798655	0.247844
BOLA2-SMG1P6	16.7182	39.1136	19.2428	26.2226	24.0316	31.8536	16.334	25.9818		22.0149	-0.0360231	0.918975	0.964056
BOLA3	13.0031	28.8205	26.4588	16.3891	40.8537	19.1122	14.5191	43.3029		43.2843	0.480334	0.222446	0.460739
BOP1	432.816	345.847	310.289	299.921	446.988	457.1	502.725	370.673		362.359	0.354599	0.0329957	0.138423
BORA	44.5819	45.2894	62.5389	68.8343	33.6442	25.4829	56.2617	90.0701		49.1615	-0.0991293	0.751258	0.878173
BORCS5	5.57274	6.17583	12.0267	16.3891	24.0316	12.7415	3.62979	17.3212		18.5775	0.450807	0.329849	0.571326
BORCS6	18.5758	8.23444	14.4321	4.91674	12.0158	14.3341	23.5936	10.3927		10.9298	0.419237	0.401406	0.636792
BORCS8	7.43031	10.2931	7.21603	8.19456	7.20948	11.1488	9.07447	6.92847		9.92741	0.0697751	0.902397	0.958642
BPGM	35.294	30.8792	36.0802	31.1393	50.4664	54.1512	29.0383	60.6241		29.4274	0.550909	0.053604	0.191044
BPHL	50.1546	24.7033	38.4855	31.1393	28.8379	30.261	32.6681	36.3745		50.6968	-0.16607	0.560618	0.75947
BPNT1	20.4334	8.23444	19.2428	13.1113	31.2411	22.2976	38.1128	20.7854		40.4669	0.875209	0.0182578	0.0924504
BPTF	919.501	979.898	779.331	1050.54	944.442	1084.62	733.217	1032.34		659.365	0.0238923	0.872645	0.9466
BRAF	27.8637	53.5239	28.8641	47.5285	40.8537	41.4097	45.3723	48.4993		44.7911	0.148178	0.572127	0.767738
BRAP	61.3001	57.6411	50.5122	57.3619	79.3043	79.6341	54.4468	69.2847		74.0963	0.306669	0.153388	0.36895
BRAT1	226.625	212.037	252.561	201.586	173.028	144.934	270.419	138.569		154.267	-0.295185	0.161217	0.38182
BRCA1	135.603	144.103	110.646	175.364	127.367	95.5609	94.3745	143.766		107.699	-0.307353	0.196295	0.428084
BRCA2	182.043	214.095	113.051	173.725	225.897	208.641	147.006	233.836		135.55	0.248232	0.256295	0.495928
BRCC3	9.28789	8.23444	14.4321	14.7502	16.8221	9.55609	9.07447	13.8569		18.3391	0.0420901	0.9273	0.967446
BRD1	222.909	212.037	257.372	163.891	201.865	191.122	263.16	195.729		158.129	0.00357375	0.981988	0.990445
BRD2	3.71516	2.05861	9.62138	1.63891	9.61264	11.1488	1.81489	1.73212		3.32844	0.577032	0.495571	0.712647
BRD3	217.337	203.802	216.481	145.863	201.865	230.939	199.638	242.496		213.048	0.171074	0.317574	0.557973
BRD4	306.5	271.737	235.724	214.698	391.715	425.246	377.498	443.422		379.205	0.673137	1.16274e-05	0.00033758
BRD7	183.9	181.158	165.969	240.92	240.316	269.163	172.415	265.014		173.313	0.288479	0.118692	0.316185
BRD8	133.746	92.6375	91.4031	88.5013	141.786	117.859	103.449	138.569		106.402	0.294047	0.120538	0.319759
BRD9	85.4486	111.165	88.9977	77.0289	120.158	119.451	88.9298	117.784		86.4832	0.303839	0.176879	0.404392
BRF1	35.294	41.1722	33.6748	29.5004	48.0632	38.2244	54.4468	36.3745		36.5512	0.339323	0.237396	0.477497
BRF2	50.1546	26.7619	28.8641	39.3339	40.8537	52.5585	36.2979	34.6424		35.7601	0.164793	0.54718	0.750335
BRI3	59.4425	53.5239	101.024	52.4452	79.3043	92.3756	81.6702	53.6956		63.3009	0.219976	0.493811	0.710931
BRI3BP	35.294	34.9964	45.7015	37.695	84.1106	65.3	72.5957	50.2314		50.9919	0.819828	0.00242229	0.0226221
BRICD5	3.71516	2.05861	9.62138	8.19456	12.0158	6.37073	9.07447	12.1248		4.07672	0.738449	0.271097	0.511929
BRINP1	89.1638	65.8755	60.1336	62.2787	52.8695	62.1146	43.5574	36.3745		36.4066	-0.513914	0.0446345	0.168429
BRIP1	70.588	121.458	57.7283	83.5845	62.4822	66.8927	45.3723	62.3562		70.4938	-0.496455	0.0320183	0.135961
BRIX1	72.4456	123.517	55.3229	129.474	117.755	164.046	83.4851	136.837		175.254	0.390597	0.123691	0.324993
BRK1	37.1516	59.6997	36.0802	47.5285	55.2727	39.8171	34.483	57.1599		82.2777	0.031768	0.907526	0.959872
BRMS1	37.1516	45.2894	24.0534	42.6117	69.6916	39.8171	45.3723	43.3029		57.4189	0.361773	0.196749	0.428701
BRMS1L	9.28789	18.5275	7.21603	21.3059	12.0158	9.55609	14.5191	22.5175		18.0318	0.0245791	0.955792	0.978866
BROX	31.5788	18.5275	19.2428	22.9448	38.4506	31.8536	21.7787	20.7854		56.4883	0.248449	0.435542	0.663398
BRPF1	130.031	137.927	144.321	108.168	144.19	141.749	161.526	157.623		93.5055	0.229959	0.158568	0.377367
BRPF3	150.464	152.337	158.753	126.196	151.399	157.676	159.711	142.034		106.337	0.0638074	0.69853	0.849009
BRSK1	59.4425	41.1722	96.2138	62.2787	57.6758	76.4488	65.3362	50.2314		35.4507	-0.0326655	0.904761	0.959173
BRSK2	81.7335	39.1136	40.8908	39.3339	45.66	35.039	27.2234	27.7139		29.6029	-0.59517	0.0560217	0.197046
BRWD1	117.027	189.392	168.374	236.003	197.059	229.346	210.528	226.907		146.268	0.279778	0.17115	0.396576
BRWD3	109.597	152.337	156.347	217.975	127.367	160.861	161.526	225.175		122.409	0.0869578	0.720259	0.860123
BSCL2	146.749	121.458	149.131	96.6958	213.881	172.01	194.194	178.408		128.212	0.565678	0.00190146	0.0190161
BSDC1	61.3001	59.6997	74.5657	45.8896	100.933	71.6707	54.4468	64.0884		64.4593	0.266906	0.252322	0.492577
BSG	1034.67	928.433	1313.32	991.542	1023.75	1020.91	1125.23	940.54		1506.73	-0.0514173	0.655167	0.820585
BSN	79.8759	57.6411	33.6748	22.9448	55.2727	36.6317	21.7787	39.8387		25.8392	-0.355866	0.333606	0.574691
BSPRY	14.8606	18.5275	16.8374	16.3891	12.0158	12.7415	7.25957	19.0533		11.918	-0.368738	0.39352	0.630602
BST2	68.7304	86.4616	175.59	137.669	9.61264	14.3341	14.5191	19.0533		85.3063	-2.99429	1.37542e-15	5.06923e-13
BTAF1	278.637	304.674	315.1	367.116	189.85	227.754	237.751	299.656		201.864	-0.402004	0.0249368	0.11501
BTBD1	146.749	104.989	88.9977	101.613	132.174	152.898	183.304	107.391		105.231	0.375508	0.0548689	0.194172
BTBD10	57.5849	49.4066	24.0534	52.4452	62.4822	43.0024	30.8532	39.8387		50.1771	-0.112509	0.681447	0.837864
BTBD11	57.5849	39.1136	26.4588	36.0561	28.8379	23.8902	32.6681	12.1248		25.1614	-0.738544	0.028382	0.125496
BTBD17	29.7213	12.3517	2.40534	6.55565	0	3.18536	3.62979	1.73212		5.15685	-2.51519	0.00629044	0.0456695
BTBD2	286.067	261.444	418.53	263.865	129.771	87.5975	143.377	84.8738		157.855	-1.46981	9.25254e-14	2.2734e-11
BTBD3	72.4456	111.165	120.267	113.085	69.6916	57.3366	78.0404	69.2847		83.4832	-0.602941	0.00563747	0.0421247
BTBD6	52.0122	45.2894	31.2695	34.4172	57.6758	54.1512	59.8915	76.2132		30.6473	0.601957	0.0475927	0.175717
BTBD8	7.43031	22.6447	14.4321	24.5837	4.80632	9.55609	5.44468	10.3927		11.7499	-1.16906	0.0350777	0.143918
BTBD9	11.1455	8.23444	9.62138	8.19456	7.20948	9.55609	19.9638	13.8569		12.934	0.469929	0.333623	0.574691
BTD	52.0122	37.055	76.971	47.5285	36.0474	39.8171	45.3723	39.8387		59.0029	-0.376536	0.125501	0.32798
BTF3	492.258	465.246	392.071	475.285	514.276	649.814	411.981	606.241		1098.82	0.257866	0.0902811	0.26783
BTF3L4	76.1607	78.2272	38.4855	67.1954	69.6916	68.4853	65.3362	79.6774		204.313	0.1062	0.644171	0.812872
BTG1	55.7274	47.348	57.7283	73.7511	48.0632	54.1512	43.5574	58.892		56.5527	-0.202106	0.398658	0.63428
BTG2	0	2.05861	2.40534	1.63891	9.61264	3.18536	0	3.46424		3.04866	1.36529	0.212262	0.449604
BTG3	14.8606	20.5861	24.0534	16.3891	21.6284	30.261	1.81489	1.73212		20.7445	-0.442457	0.341276	0.582157
BTN2A1	16.7182	14.4103	14.4321	19.667	26.4348	27.0756	25.4085	29.446		18.468	0.715859	0.0483061	0.177671
BTN2A2	33.4364	28.8205	24.0534	27.8615	19.2253	15.9268	9.07447	10.3927		16.0974	-1.09776	0.00533957	0.0405168
BTN3A2	7.43031	4.11722	2.40534	1.63891	0	0	1.81489	0		1.75917	-2.79061	0.0360019	0.146877
BTRC	39.0092	47.348	19.2428	47.5285	19.2253	43.0024	25.4085	57.1599		45.3909	-0.0701473	0.804415	0.904828
BUB1	430.958	448.777	358.396	375.311	264.348	302.61	275.864	294.46		425.629	-0.501652	0.000167786	0.00307837
BUB1B	339.937	368.491	319.911	462.173	338.846	297.832	341.2	453.815		399.669	-0.0620575	0.718976	0.859192
BUB3	401.237	389.077	300.668	335.977	295.589	288.276	341.2	322.174		447.302	-0.196193	0.153628	0.369362
BUD13	79.8759	84.403	48.1069	85.2235	108.142	101.932	88.9298	93.5343		75.5927	0.380997	0.117167	0.313588
BUD23	52.0122	34.9964	26.4588	36.0561	72.0948	44.5951	56.2617	51.9635		98.5898	0.546982	0.0363893	0.147983
BUD31	63.1577	61.7583	40.8908	49.1674	55.2727	74.8561	56.2617	84.8738		83.9294	0.344427	0.119617	0.317879
BVES	1.85758	4.11722	2.40534	1.63891	7.20948	4.77805	1.81489	5.19635		3.72028	0.919655	0.294321	0.53461
BX255925.3	33.4364	28.8205	55.3229	19.667	40.8537	25.4829	58.0766	34.6424		18.6824	0.236049	0.514169	0.727125
BX664615.2	20.4334	12.3517	12.0267	8.19456	21.6284	19.1122	25.4085	22.5175		17.4143	0.744935	0.0899598	0.267288
BYSL	131.888	121.458	161.158	131.113	156.205	173.602	194.194	166.283		160.124	0.352918	0.0196677	0.0973751
BZW1	468.11	407.605	315.1	370.394	543.114	589.293	493.651	569.867		523.573	0.490774	0.0184911	0.0933569
BZW2	245.2	216.154	192.428	288.449	235.51	234.124	219.602	207.854		238.112	-0.0841483	0.573727	0.769082
C10orf82	11.1455	10.2931	7.21603	8.19456	2.40316	9.55609	1.81489	10.3927		5.13401	-0.54883	0.38737	0.624852
C10orf88	20.4334	16.4689	14.4321	13.1113	9.61264	14.3341	12.7043	17.3212		15.9135	-0.228407	0.582635	0.775022
C10orf95	13.0031	2.05861	28.8641	3.27783	7.20948	9.55609	3.62979	5.19635		5.01131	-0.837826	0.300683	0.54167
C11orf1	11.1455	14.4103	7.21603	9.83348	14.419	11.1488	9.07447	8.66059		16.3403	-0.0133176	0.977722	0.988849
C11orf24	66.8728	55.5825	50.5122	44.2506	74.498	82.8195	99.8191	112.588		52.6328	0.778053	0.00063496	0.00834034
C11orf49	26.0061	26.7619	19.2428	29.5004	14.419	28.6683	19.9638	38.1066		36.8412	0.0164668	0.95788	0.979533
C11orf54	0	2.05861	4.81069	3.27783	9.61264	7.96341	5.44468	3.46424		8.97053	1.40455	0.0806294	0.249535
C11orf58	130.031	144.103	72.1603	144.224	153.802	148.119	79.8553	147.23		252.514	0.0928015	0.677037	0.834365
C11orf68	57.5849	34.9964	62.5389	49.1674	52.8695	36.6317	61.7064	36.3745		46.4535	-0.131936	0.632913	0.805443
C11orf71	27.8637	20.5861	16.8374	13.1113	9.61264	19.1122	25.4085	15.5891		17.2799	-0.135751	0.735307	0.86897
C11orf74	16.7182	30.8792	31.2695	37.695	14.419	6.37073	19.9638	10.3927		23.3045	-1.22225	0.00213363	0.0207743
C11orf80	39.0092	53.5239	50.5122	42.6117	14.419	20.7049	32.6681	45.0351		28.4522	-0.6814	0.028237	0.125208
C11orf95	98.4517	121.458	113.051	108.168	124.964	132.193	136.117	93.5343		65.068	0.143732	0.528454	0.737095
C11orf96	0	0	2.40534	0	0	0	9.07447	0		1.88583	1.94453	0.17417	0.400529
C11orf98	22.2909	12.3517	12.0267	21.3059	24.0316	39.8171	16.334	46.7672		40.5314	0.891472	0.0176259	0.0905579
C12orf10	120.743	137.927	125.078	154.058	103.336	119.451	125.228	102.195		139.507	-0.257823	0.114448	0.309189
C12orf29	18.5758	16.4689	4.81069	9.83348	16.8221	17.5195	16.334	29.446		26.6359	0.675767	0.100718	0.286468
C12orf4	14.8606	18.5275	19.2428	26.2226	33.6442	23.8902	21.7787	34.6424		24.692	0.503351	0.15743	0.375334
C12orf43	24.1485	24.7033	12.0267	24.5837	26.4348	20.7049	23.5936	25.9818		31.0705	0.135984	0.685323	0.839964
C12orf45	35.294	22.6447	28.8641	22.9448	43.2569	47.7805	10.8894	50.2314		66.5761	0.477056	0.146062	0.359093
C12orf49	57.5849	28.8205	74.5657	34.4172	45.66	52.5585	59.8915	48.4993		33.3812	0.103851	0.748417	0.87694
C12orf57	137.461	121.458	132.294	124.557	81.7074	81.2268	88.9298	88.338		133.215	-0.598087	0.00168364	0.0173579
C12orf60	5.57274	0	0	6.55565	2.40316	0	0	6.92847		4.09567	-0.527427	0.579374	0.772602
C12orf65	18.5758	12.3517	12.0267	19.667	14.419	1.59268	23.5936	13.8569		18.7715	-0.289819	0.520687	0.732129
C12orf66	18.5758	30.8792	40.8908	29.5004	7.20948	19.1122	25.4085	10.3927		19.9027	-0.889564	0.022083	0.106065
C12orf73	11.1455	6.17583	12.0267	4.91674	9.61264	6.37073	3.62979	3.46424		8.68656	-0.588059	0.335039	0.576462
C12orf75	1.85758	0	0	4.91674	0	1.59268	1.81489	1.73212		2.62656	-0.470604	0.70457	0.851806
C12orf76	5.57274	0	0	3.27783	0	0	0	0		1.9641	-2.7932	0.039103	0.154682
C13orf42	13.0031	12.3517	14.4321	19.667	24.0316	20.7049	12.7043	10.3927		15.2807	0.151398	0.732575	0.867811
C14orf119	120.743	78.2272	60.1336	96.6958	81.7074	41.4097	110.708	55.4278		145.81	-0.330192	0.178107	0.406569
C14orf132	7.43031	14.4103	16.8374	9.83348	7.20948	4.77805	5.44468	0		9.64203	-1.50428	0.0144881	0.0800004
C14orf39	0	2.05861	0	0	0	0	0	0		1.28827	-0.802662	0.618563	0.797779
C14orf93	31.5788	14.4103	26.4588	18.028	24.0316	19.1122	14.5191	8.66059		13.7792	-0.470973	0.244725	0.484656
C15orf39	234.055	203.802	283.831	154.058	521.486	418.875	631.583	450.351		271.846	1.21459	1.43546e-09	1.33243e-07
C15orf40	13.0031	18.5275	19.2428	8.19456	12.0158	12.7415	3.62979	10.3927		14.2503	-0.572047	0.256167	0.495858
C15orf41	20.4334	12.3517	9.62138	6.55565	7.20948	7.96341	19.9638	13.8569		23.3395	0.0231077	0.958441	0.979713
C15orf61	9.28789	6.17583	16.8374	9.83348	31.2411	20.7049	30.8532	15.5891		14.9774	1.23356	0.0166845	0.0875151
C16orf46	7.43031	0	4.81069	1.63891	4.80632	7.96341	3.62979	0		2.68738	0.262872	0.772249	0.888429
C16orf58	27.8637	53.5239	57.7283	45.8896	45.66	49.3732	49.0021	51.9635		50.0042	0.108017	0.667999	0.828463
C16orf70	16.7182	34.9964	16.8374	11.4724	7.20948	15.9268	25.4085	22.5175		29.2876	-0.110186	0.779004	0.891561
C16orf72	170.897	113.224	132.294	118.002	189.85	173.602	181.489	193.997		167.961	0.465585	0.0195497	0.0969822
C16orf87	18.5758	22.6447	19.2428	22.9448	24.0316	14.3341	5.44468	15.5891		31.1694	-0.540378	0.180512	0.409058
C16orf91	13.0031	18.5275	4.81069	13.1113	24.0316	7.96341	14.5191	10.3927		16.4446	0.109246	0.813952	0.910916
C16orf96	3.71516	18.5275	9.62138	6.55565	4.80632	3.18536	1.81489	0		4.31243	-2.02055	0.0146598	0.0805005
C17orf100	5.57274	2.05861	0	3.27783	0	7.96341	3.62979	0		1.55554	0.112317	0.919162	0.964093
C17orf113	5.57274	12.3517	7.21603	8.19456	4.80632	3.18536	5.44468	3.46424		4.52678	-0.997889	0.152305	0.367852
C17orf53	50.1546	41.1722	40.8908	36.0561	48.0632	50.9658	54.4468	46.7672		45.3611	0.25569	0.314147	0.555229
C17orf58	18.5758	16.4689	24.0534	22.9448	14.419	14.3341	18.1489	6.92847		15.3545	-0.615277	0.12955	0.334463
C17orf75	61.3001	78.2272	57.7283	68.8343	69.6916	63.7073	30.8532	72.7489		80.6573	-0.175936	0.484033	0.703701
C17orf80	79.8759	86.4616	62.5389	73.7511	81.7074	74.8561	68.9659	105.659		72.5436	0.125211	0.543666	0.748387
C17orf97	0	6.17583	9.62138	1.63891	2.40316	1.59268	3.62979	10.3927		3.48725	0.171673	0.842666	0.927406
C18orf21	26.0061	37.055	33.6748	62.2787	69.6916	60.5219	43.5574	58.892		56.812	0.510199	0.0473489	0.175075
C18orf25	33.4364	41.1722	40.8908	31.1393	38.4506	52.5585	43.5574	43.3029		55.5235	0.31159	0.222062	0.4604
C18orf32	0	0	2.40534	6.55565	0	3.18536	0	1.73212		7.60473	-0.81543	0.465814	0.689722
C18orf54	20.4334	43.2308	43.2962	36.0561	28.8379	52.5585	43.5574	43.3029		26.0628	0.274074	0.360888	0.600946
C19orf12	11.1455	24.7033	14.4321	14.7502	4.80632	11.1488	5.44468	12.1248		11.4972	-0.904046	0.0831913	0.254261
C19orf25	26.0061	34.9964	43.2962	47.5285	52.8695	35.039	25.4085	31.1781		32.7431	-0.0986993	0.758999	0.88214
C19orf44	18.5758	22.6447	19.2428	11.4724	16.8221	15.9268	7.25957	17.3212		12.3344	-0.312166	0.480564	0.701272
C19orf47	40.8667	26.7619	19.2428	19.667	40.8537	43.0024	45.3723	43.3029		29.6556	0.689758	0.0259421	0.117868
C19orf48	126.315	109.106	101.024	72.1122	108.142	97.1536	81.6702	86.6059		50.0713	-0.129734	0.556728	0.75656
C19orf53	102.167	115.282	103.43	91.7791	170.624	122.637	101.634	126.445		133.458	0.33007	0.154612	0.370874
C19orf54	37.1516	30.8792	57.7283	34.4172	24.0316	33.4463	59.8915	43.3029		37.577	0.0466337	0.872632	0.9466
C19orf57	5.57274	8.23444	14.4321	18.028	7.20948	6.37073	9.07447	12.1248		7.47973	-0.413582	0.450991	0.676896
C19orf81	3.71516	14.4103	7.21603	6.55565	2.40316	4.77805	7.25957	0		5.84332	-1.09892	0.126153	0.328858
C19orf84	9.28789	6.17583	4.81069	4.91674	9.61264	0	5.44468	6.92847		7.0401	-0.300223	0.651719	0.818141
C19orf85	5.57274	0	12.0267	9.83348	2.40316	4.77805	3.62979	0		5.23808	-1.31146	0.110736	0.302845
C1D	20.4334	14.4103	9.62138	18.028	28.8379	28.6683	18.1489	32.9102		46.9056	0.762813	0.0387597	0.154092
C1GALT1	66.8728	61.7583	50.5122	96.6958	72.0948	109.895	112.523	133.373		92.1428	0.624595	0.00490204	0.0381064
C1GALT1C1	40.8667	55.5825	31.2695	47.5285	26.4348	28.6683	21.7787	31.1781		56.3875	-0.704381	0.0177986	0.0912578
C1orf109	39.0092	30.8792	36.0802	22.9448	31.2411	44.5951	56.2617	31.1781		38.736	0.369734	0.214526	0.452184
C1orf112	42.7243	26.7619	38.4855	50.8063	48.0632	38.2244	41.7425	57.1599		49.574	0.200666	0.476351	0.697494
C1orf115	7.43031	10.2931	2.40534	14.7502	2.40316	6.37073	9.07447	1.73212		7.69629	-0.855058	0.175072	0.401654
C1orf116	11.1455	10.2931	9.62138	9.83348	7.20948	7.96341	7.25957	10.3927		8.48506	-0.30794	0.556665	0.75656
C1orf122	27.8637	32.9378	38.4855	21.3059	31.2411	36.6317	54.4468	34.6424		40.4181	0.411232	0.224538	0.462152
C1orf131	26.0061	10.2931	12.0267	18.028	12.0158	15.9268	27.2234	19.0533		26.2106	0.147902	0.68846	0.841586
C1orf159	0	6.17583	7.21603	9.83348	2.40316	6.37073	10.8894	10.3927		6.68272	0.406342	0.546659	0.749894
C1orf167	9.28789	4.11722	7.21603	8.19456	4.80632	12.7415	9.07447	13.8569		5.03615	0.516323	0.389662	0.626697
C1orf174	33.4364	32.9378	36.0802	22.9448	16.8221	38.2244	34.483	43.3029		49.784	0.14628	0.613712	0.794752
C1orf198	105.882	65.8755	81.7817	57.3619	52.8695	50.9658	47.1872	50.2314		60.4672	-0.625518	0.0233021	0.109898
C1orf21	14.8606	14.4103	2.40534	6.55565	4.80632	0	3.62979	6.92847		6.09323	-1.38035	0.058587	0.202358
C1orf210	5.57274	8.23444	14.4321	8.19456	0	6.37073	7.25957	6.92847		8.97217	-0.69502	0.249564	0.489939
C1orf216	20.4334	14.4103	24.0534	8.19456	7.20948	4.77805	12.7043	5.19635		8.52879	-1.14708	0.031251	0.133928
C1orf226	5.57274	16.4689	7.21603	13.1113	9.61264	3.18536	7.25957	12.1248		9.69981	-0.439694	0.424252	0.654914
C1orf35	31.5788	24.7033	28.8641	24.5837	36.0474	28.6683	21.7787	19.0533		31.0652	-0.0755167	0.825766	0.918243
C1orf43	102.167	104.989	98.6191	134.391	158.609	154.49	148.821	166.283		88.5808	0.503104	0.00894104	0.0576859
C1orf50	9.28789	6.17583	2.40534	6.55565	4.80632	12.7415	12.7043	17.3212		12.072	0.96332	0.0784699	0.245336
C1orf52	31.5788	47.348	40.8908	31.1393	69.6916	35.039	30.8532	24.2496		46.4067	0.051755	0.872638	0.9466
C1orf54	3.71516	8.23444	2.40534	4.91674	4.80632	1.59268	5.44468	6.92847		9.98489	-0.0765608	0.913446	0.962096
C1orf56	5.57274	12.3517	16.8374	9.83348	9.61264	6.37073	7.25957	6.92847		8.4217	-0.551236	0.318374	0.558981
C1orf74	13.0031	18.5275	7.21603	13.1113	12.0158	7.96341	5.44468	12.1248		11.3456	-0.50534	0.309194	0.550294
C1orf94	13.0031	18.5275	4.81069	3.27783	2.40316	4.77805	7.25957	6.92847		7.09867	-0.852986	0.242932	0.483351
C1QBP	841.483	609.349	589.309	542.48	855.525	869.605	776.774	729.222		933.943	0.322196	0.0386231	0.153956
C1QL1	24.1485	18.5275	16.8374	13.1113	4.80632	1.59268	1.81489	6.92847		6.72253	-2.29153	0.000469449	0.00667726
C1QL3	3.71516	6.17583	21.6481	11.4724	4.80632	7.96341	3.62979	5.19635		6.17318	-0.925023	0.146016	0.359052
C1QL4	0	8.23444	2.40534	6.55565	2.40316	0	1.81489	0		1.86536	-2.20753	0.0963635	0.278105
C1QTNF4	48.297	39.1136	52.9176	22.9448	7.20948	12.7415	18.1489	13.8569		20.1782	-1.60662	0.000154441	0.00288005
C1QTNF6	9.28789	6.17583	14.4321	6.55565	2.40316	6.37073	5.44468	3.46424		6.56662	-0.954553	0.137295	0.346374
C1R	27.8637	45.2894	33.6748	29.5004	40.8537	28.6683	34.483	22.5175		32.1421	-0.121301	0.692799	0.844665
C1RL	29.7213	30.8792	38.4855	16.3891	16.8221	6.37073	9.07447	8.66059		20.5062	-1.5313	0.000272295	0.00447199
C1S	22.2909	10.2931	14.4321	6.55565	7.20948	3.18536	1.81489	6.92847		10.311	-1.51811	0.0112747	0.0676644
C20orf194	7.43031	18.5275	24.0534	26.2226	16.8221	6.37073	10.8894	13.8569		15.4008	-0.706523	0.127543	0.331173
C20orf27	98.4517	111.165	98.6191	62.2787	105.739	79.6341	125.228	76.2132		103.577	0.0642436	0.820154	0.914803
C20orf96	27.8637	39.1136	16.8374	39.3339	16.8221	20.7049	27.2234	25.9818		28.6681	-0.451535	0.19198	0.423539
C21orf58	11.1455	8.23444	16.8374	9.83348	12.0158	9.55609	7.25957	12.1248		6.27517	-0.155409	0.771276	0.887824
C21orf91	24.1485	28.8205	21.6481	47.5285	26.4348	30.261	30.8532	39.8387		35.2912	0.0352705	0.906624	0.959304
C22orf39	33.4364	26.7619	48.1069	16.3891	26.4348	31.8536	34.483	10.3927		24.8802	-0.235365	0.49783	0.714093
C2CD2	29.7213	30.8792	50.5122	37.695	19.2253	28.6683	27.2234	13.8569		23.8801	-0.71297	0.0327928	0.138109
C2CD2L	5.57274	4.11722	2.40534	11.4724	4.80632	7.96341	14.5191	13.8569		5.72506	0.760796	0.260469	0.500456
C2CD3	83.591	78.2272	43.2962	83.5845	60.079	71.6707	88.9298	77.9453		52.332	0.0384519	0.877168	0.948102
C2CD4C	24.1485	22.6447	64.9443	54.0841	31.2411	17.5195	29.0383	17.3212		20.6614	-0.814244	0.0653917	0.217584
C2CD4D	9.28789	10.2931	4.81069	8.19456	2.40316	9.55609	5.44468	1.73212		3.85358	-0.728201	0.312729	0.553817
C2CD5	117.027	139.985	110.646	140.946	182.64	175.195	161.526	199.194		111.998	0.491953	0.00562693	0.0421033
C2orf15	1.85758	8.23444	2.40534	3.27783	2.40316	3.18536	0	6.92847		3.67982	-0.288954	0.732722	0.867811
C2orf16	7.43031	12.3517	31.2695	14.7502	12.0158	12.7415	12.7043	10.3927		7.17104	-0.418427	0.419533	0.651689
C2orf42	22.2909	18.5275	19.2428	13.1113	19.2253	14.3341	18.1489	13.8569		11.2009	-0.163255	0.702848	0.850917
C2orf49	11.1455	18.5275	12.0267	14.7502	14.419	20.7049	10.8894	10.3927		23.8466	0.00939758	0.981756	0.990445
C2orf68	48.297	55.5825	38.4855	45.8896	48.0632	52.5585	56.2617	53.6956		49.3833	0.161305	0.568483	0.764424
C2orf69	42.7243	51.4653	60.1336	54.0841	72.0948	74.8561	74.4106	58.892		52.0711	0.432944	0.0881612	0.263524
C2orf74	0	6.17583	4.81069	8.19456	2.40316	1.59268	0	0		4.51385	-2.38754	0.0386394	0.153956
C2orf76	1.85758	2.05861	0	6.55565	4.80632	7.96341	3.62979	8.66059		6.62674	1.1504	0.145288	0.358035
C3	14.8606	10.2931	31.2695	14.7502	9.61264	1.59268	0	3.46424		8.53362	-2.40711	0.000312074	0.00491419
C3orf14	9.28789	6.17583	2.40534	3.27783	2.40316	7.96341	9.07447	1.73212		11.0932	0.0365741	0.954703	0.978533
C3orf18	7.43031	6.17583	12.0267	8.19456	2.40316	1.59268	3.62979	0		3.88899	-2.17461	0.0148456	0.0812357
C3orf33	1.85758	2.05861	4.81069	3.27783	0	0	0	3.46424		4.16267	-1.66183	0.16759	0.390784
C3orf38	72.4456	34.9964	45.7015	31.1393	72.0948	46.1878	54.4468	64.0884		58.9062	0.347828	0.169311	0.393689
C3orf52	13.0031	10.2931	7.21603	6.55565	14.419	9.55609	14.5191	3.46424		13.6454	0.142472	0.795113	0.899684
C3orf62	5.57274	4.11722	7.21603	4.91674	9.61264	3.18536	1.81489	1.73212		2.5014	-0.504407	0.552105	0.753477
C3orf67	7.43031	10.2931	14.4321	19.667	14.419	19.1122	7.25957	15.5891		9.98027	0.117796	0.801521	0.903136
C4orf3	20.4334	53.5239	62.5389	39.3339	52.8695	50.9658	70.7808	41.5708		77.5129	0.327015	0.228276	0.466416
C4orf33	0	2.05861	4.81069	6.55565	2.40316	3.18536	1.81489	5.19635		5.96644	-0.0822057	0.921783	0.965017
C4orf46	42.7243	32.9378	31.2695	32.7783	21.6284	33.4463	19.9638	20.7854		38.3788	-0.532076	0.111264	0.303757
C4orf48	37.1516	37.055	45.7015	50.8063	33.6442	15.9268	30.8532	17.3212		26.6232	-0.836989	0.0277495	0.123659
C5orf15	78.0183	67.9341	88.9977	72.1122	93.7232	76.4488	52.6319	65.8205		113.883	-0.0990407	0.625728	0.801082
C5orf22	35.294	45.2894	38.4855	47.5285	40.8537	49.3732	49.0021	60.6241		62.0949	0.2679	0.33207	0.57348
C5orf24	29.7213	26.7619	28.8641	21.3059	19.2253	22.2976	14.5191	32.9102		25.6616	-0.235263	0.493412	0.710748
C5orf30	46.4395	53.5239	16.8374	37.695	38.4506	19.1122	10.8894	22.5175		28.4096	-0.83616	0.0122234	0.0717093
C5orf34	18.5758	16.4689	14.4321	19.667	21.6284	14.3341	16.334	12.1248		18.7186	-0.150532	0.708826	0.854067
C5orf38	9.28789	8.23444	9.62138	9.83348	7.20948	3.18536	3.62979	0		8.52094	-1.51173	0.0285193	0.125748
C5orf51	37.1516	30.8792	24.0534	36.0561	40.8537	30.261	29.0383	31.1781		43.4324	-0.00485209	0.986947	0.99348
C5orf58	0	4.11722	0	1.63891	2.40316	1.59268	0	1.73212		3.24464	-0.0780568	0.950034	0.975969
C5orf63	0	0	0	0	2.40316	0	7.25957	0		1.5305	2.70337	0.0693481	0.22664
C6orf120	122.6	127.634	127.483	57.3619	110.545	100.339	107.079	64.0884		70.1486	-0.180571	0.471837	0.694407
C6orf132	250.773	214.095	199.644	163.891	225.897	216.605	214.157	197.461		172.379	0.0444389	0.772972	0.888634
C6orf136	9.28789	4.11722	0	6.55565	14.419	14.3341	14.5191	8.66059		7.95909	1.29189	0.0399586	0.156805
C6orf141	9.28789	16.4689	12.0267	18.028	7.20948	9.55609	1.81489	5.19635		5.94942	-1.23523	0.0631619	0.212638
C6orf163	0	2.05861	4.81069	1.63891	4.80632	7.96341	5.44468	3.46424		2.40757	1.46202	0.142051	0.353956
C6orf226	13.0031	12.3517	14.4321	4.91674	0	4.77805	0	1.73212		8.84543	-2.58395	0.00273434	0.0246504
C6orf62	109.597	102.931	139.51	95.0569	81.7074	92.3756	107.079	109.123		53.6302	-0.17745	0.398783	0.634397
C6orf89	29.7213	22.6447	21.6481	14.7502	38.4506	19.1122	38.1128	25.9818		28.3205	0.434462	0.191971	0.423539
C7orf25	22.2909	30.8792	24.0534	32.7783	38.4506	19.1122	29.0383	31.1781		20.2455	0.0598272	0.857901	0.936851
C7orf26	53.8698	55.5825	43.2962	47.5285	69.6916	73.2634	107.079	72.7489		50.2604	0.688775	0.00290081	0.0257437
C7orf31	0	4.11722	4.81069	6.55565	0	0	5.44468	3.46424		1.91537	-0.765391	0.50269	0.71778
C7orf50	92.8789	98.8133	103.43	99.9737	74.498	81.2268	76.2255	83.1416		104.552	-0.321327	0.164274	0.385997
C7orf57	0	0	2.40534	0	4.80632	3.18536	3.62979	1.73212		2.40243	2.44235	0.0489546	0.179162
C8orf33	85.4486	92.6375	55.3229	70.4732	98.5296	116.266	107.079	98.7307		98.9905	0.46636	0.049477	0.180389
C8orf37	3.71516	6.17583	7.21603	3.27783	4.80632	1.59268	3.62979	1.73212		4.43884	-0.822251	0.329894	0.571326
C8orf58	20.4334	24.7033	24.0534	31.1393	31.2411	22.2976	45.3723	17.3212		22.4528	0.18823	0.59416	0.782303
C8orf76	13.0031	16.4689	4.81069	13.1113	2.40316	9.55609	7.25957	12.1248		9.7652	-0.563147	0.285505	0.525356
C8orf82	40.8667	30.8792	64.9443	34.4172	33.6442	31.8536	23.5936	27.7139		26.3172	-0.536455	0.124411	0.325998
C8orf88	5.57274	14.4103	2.40534	6.55565	2.40316	4.77805	1.81489	3.46424		13.4955	-1.18624	0.0946174	0.275494
C9orf116	7.43031	6.17583	7.21603	8.19456	7.20948	1.59268	3.62979	5.19635		8.67122	-0.802734	0.239373	0.479627
C9orf129	13.0031	4.11722	7.21603	4.91674	7.20948	14.3341	7.25957	5.19635		5.42211	0.239354	0.708986	0.854178
C9orf135	18.5758	16.4689	26.4588	45.8896	40.8537	44.5951	32.6681	58.892		44.3453	0.695375	0.0228484	0.108837
C9orf16	35.294	49.4066	69.755	34.4172	55.2727	39.8171	43.5574	24.2496		43.6123	-0.209191	0.550402	0.752054
C9orf40	24.1485	26.7619	40.8908	44.2506	48.0632	23.8902	49.0021	34.6424		37.2672	0.166469	0.585458	0.776747
C9orf64	0	0	0	0	21.6284	30.261	41.7425	34.6424		24.3451	6.48511	7.92517e-10	8.07401e-08
C9orf72	33.4364	41.1722	33.6748	40.9728	28.8379	35.039	19.9638	38.1066		32.6322	-0.286359	0.33214	0.573522
C9orf78	70.588	53.5239	55.3229	57.3619	40.8537	54.1512	68.9659	90.0701		75.5329	0.114031	0.660995	0.824501
C9orf85	1.85758	4.11722	0	6.55565	7.20948	6.37073	3.62979	8.66059		11.5435	0.928035	0.194487	0.426517
CA11	53.8698	86.4616	57.7283	44.2506	9.61264	14.3341	21.7787	19.0533		31.7919	-1.86442	2.16095e-08	1.51279e-06
CA12	5.57274	6.17583	0	3.27783	2.40316	0	1.81489	3.46424		3.77969	-1.06619	0.26906	0.509919
CA13	0	0	0	1.63891	0	1.59268	1.81489	1.73212		2.04385	1.19154	0.410065	0.643591
CA14	40.8667	37.055	45.7015	72.1122	55.2727	31.8536	32.6681	24.2496		61.4796	-0.50533	0.0702011	0.228372
CA2	14.8606	18.5275	21.6481	14.7502	9.61264	12.7415	7.25957	13.8569		19.8891	-0.641504	0.145707	0.358738
CA4	1.85758	2.05861	0	0	0	4.77805	5.44468	1.73212		3.6454	1.69476	0.155424	0.372321
CA5B	9.28789	24.7033	21.6481	16.3891	19.2253	17.5195	23.5936	25.9818		21.7406	0.291704	0.438953	0.666326
CA8	1.85758	10.2931	4.81069	6.55565	4.80632	3.18536	5.44468	1.73212		6.28255	-0.662952	0.373076	0.61266
CA9	0	4.11722	4.81069	6.55565	7.20948	9.55609	18.1489	12.1248		7.00723	1.61296	0.0150758	0.082101
CAAP1	70.588	78.2272	52.9176	62.2787	84.1106	92.3756	74.4106	67.5526		80.8168	0.265449	0.263603	0.503001
CAB39	57.5849	43.2308	43.2962	77.0289	84.1106	86.0049	59.8915	96.9986		98.1637	0.539126	0.0231402	0.109588
CAB39L	1.85758	4.11722	4.81069	9.83348	2.40316	6.37073	3.62979	3.46424		4.36909	-0.36957	0.625418	0.801082
CABIN1	477.398	465.246	639.821	534.286	516.679	449.136	593.47	483.261		385.503	-0.0504338	0.77457	0.889329
CABLES1	52.0122	82.3444	72.1603	59.0009	112.949	71.6707	123.413	96.9986		48.8895	0.610212	0.00919156	0.058825
CABLES2	27.8637	16.4689	28.8641	16.3891	7.20948	22.2976	23.5936	19.0533		15.4405	-0.246591	0.521958	0.732773
CABP1	0	2.05861	0	0	2.40316	7.96341	9.07447	8.66059		3.79343	3.60087	0.00186369	0.0187376
CABYR	9.28789	12.3517	12.0267	11.4724	16.8221	19.1122	14.5191	15.5891		19.457	0.560263	0.1868	0.416918
CACFD1	18.5758	12.3517	24.0534	18.028	12.0158	14.3341	9.07447	5.19635		18.7509	-0.838531	0.0672613	0.22192
CACHD1	159.752	191.451	170.779	245.837	194.656	205.456	221.417	233.836		190.857	0.149538	0.335115	0.576514
CACNA1A	37.1516	47.348	62.5389	49.1674	12.0158	19.1122	27.2234	22.5175		20.4506	-1.23832	0.000118393	0.00233635
CACNA1B	59.4425	61.7583	67.3496	49.1674	45.66	60.5219	47.1872	60.6241		33.9354	-0.124999	0.606597	0.789929
CACNA1C	16.7182	26.7619	19.2428	26.2226	2.40316	7.96341	5.44468	6.92847		8.44098	-1.91338	0.000349348	0.00535823
CACNA1E	1.85758	6.17583	16.8374	4.91674	0	0	3.62979	0		3.05692	-2.93601	0.0148325	0.0812333
CACNA1F	1.85758	6.17583	7.21603	1.63891	0	1.59268	1.81489	3.46424		2.45305	-1.1426	0.269984	0.510899
CACNA1G	40.8667	32.9378	45.7015	36.0561	12.0158	12.7415	18.1489	17.3212		15.2858	-1.35331	0.000686141	0.00886122
CACNA1H	287.925	275.854	514.744	316.31	201.865	199.085	268.604	204.39		152.834	-0.667095	0.000773396	0.00968462
CACNA1I	5.57274	4.11722	12.0267	4.91674	7.20948	4.77805	16.334	6.92847		5.18306	0.447464	0.49953	0.71522
CACNA2D1	39.0092	43.2308	26.4588	70.4732	43.2569	46.1878	47.1872	57.1599		61.4979	0.0802355	0.761381	0.88277
CACNA2D2	61.3001	49.4066	98.6191	73.7511	48.0632	47.7805	45.3723	38.1066		66.5683	-0.649121	0.00578607	0.0428265
CACNA2D3	3.71516	6.17583	12.0267	8.19456	9.61264	17.5195	10.8894	15.5891		10.2812	0.898087	0.083978	0.255296
CACNB1	26.0061	20.5861	12.0267	9.83348	16.8221	23.8902	16.334	8.66059		10.0239	-0.0521125	0.905598	0.959304
CACNB2	9.28789	8.23444	7.21603	11.4724	2.40316	11.1488	10.8894	13.8569		7.64603	0.117202	0.825	0.917798
CACNB3	11.1455	16.4689	45.7015	22.9448	2.40316	9.55609	10.8894	13.8569		12.3266	-1.30664	0.0105091	0.0642075
CACNB4	5.57274	4.11722	7.21603	6.55565	0	0	0	0		1.89767	-4.09507	0.000861424	0.0105585
CACNG4	11.1455	0	4.81069	4.91674	21.6284	11.1488	3.62979	3.46424		4.88106	0.852875	0.250552	0.490497
CACNG5	3.71516	0	0	0	2.40316	1.59268	0	0		2.8113	-0.0826772	0.954794	0.978533
CACNG7	31.5788	32.9378	50.5122	37.695	4.80632	9.55609	12.7043	6.92847		16.545	-2.11732	5.97125e-07	2.71108e-05
CACNG8	5.57274	8.23444	7.21603	3.27783	2.40316	1.59268	0	0		2.45469	-2.68661	0.0274244	0.122602
CACTIN	120.743	129.692	132.294	119.641	108.142	130.6	141.562	131.641		87.0269	0.03856	0.837199	0.924699
CACUL1	40.8667	28.8205	38.4855	32.7783	38.4506	54.1512	49.0021	51.9635		33.0114	0.478	0.0752287	0.239255
CACYBP	182.043	177.04	156.347	204.864	177.834	203.863	116.153	232.104		396.818	0.017211	0.932085	0.968568
CAD	821.05	745.217	923.652	624.426	670.482	571.773	834.851	630.491		746.251	-0.201008	0.375014	0.615092
CADM1	18.5758	32.9378	28.8641	21.3059	28.8379	49.3732	36.2979	29.446		51.799	0.55084	0.062424	0.210959
CADM2	7.43031	4.11722	0	3.27783	0	0	5.44468	3.46424		4.84304	-0.752749	0.402224	0.637121
CADM3	9.28789	18.5275	0	3.27783	0	0	0	1.73212		4.73877	-3.79065	0.00136084	0.0148689
CADM4	27.8637	14.4103	24.0534	26.2226	2.40316	7.96341	5.44468	10.3927		18.0189	-1.76671	0.000467197	0.00665278
CADPS	27.8637	20.5861	24.0534	18.028	48.0632	19.1122	29.0383	24.2496		22.7914	0.37142	0.288137	0.527796
CADPS2	48.297	61.7583	45.7015	44.2506	26.4348	30.261	29.0383	36.3745		34.1906	-0.697022	0.0124611	0.0725604
CALB1	5.57274	12.3517	4.81069	4.91674	9.61264	7.96341	3.62979	8.66059		20.8476	0.107407	0.85963	0.937921
CALB2	3.71516	0	4.81069	0	0	0	0	1.73212		2.58359	-1.81464	0.178374	0.406993
CALCOCO1	26.0061	20.5861	24.0534	32.7783	14.419	17.5195	21.7787	19.0533		26.0944	-0.511983	0.138731	0.348943
CALCOCO2	18.5758	8.23444	28.8641	24.5837	4.80632	31.8536	23.5936	15.5891		31.7902	-0.0139362	0.972066	0.986256
CALD1	165.324	201.744	144.321	209.781	322.023	323.315	210.528	334.299		375.123	0.713307	8.78028e-06	0.000270157
CALHM2	13.0031	0	0	4.91674	4.80632	3.18536	7.25957	12.1248		2.84721	0.553451	0.536881	0.743552
CALHM6	3.71516	6.17583	4.81069	3.27783	0	0	9.07447	8.66059		3.3579	0.0420678	0.959913	0.980475
CALM1	200.618	201.744	144.321	196.67	259.541	277.127	199.638	315.245		490.365	0.49591	0.00908923	0.0583442
CALM2	178.328	226.447	125.078	234.365	230.703	258.015	143.377	258.086		617.218	0.213672	0.344043	0.585164
CALM3	131.888	137.927	117.862	160.613	151.399	127.415	112.523	138.569		326.817	-0.0641085	0.735341	0.86897
CALN1	9.28789	4.11722	2.40534	6.55565	7.20948	7.96341	1.81489	1.73212		5.205	-0.329196	0.642034	0.811512
CALR	1259.44	1412.21	1120.89	1037.43	1403.45	1458.9	1393.84	1467.1		2279.32	0.245977	0.0215962	0.104366
CALU	124.458	183.216	115.457	185.197	182.64	159.268	152.451	185.337		293.715	0.144516	0.382184	0.620597
CALY	5.57274	0	9.62138	1.63891	0	1.59268	0	1.73212		2.03574	-2.13185	0.0999403	0.285144
CAMK1	16.7182	6.17583	9.62138	9.83348	2.40316	4.77805	3.62979	3.46424		7.14834	-1.54338	0.0221838	0.106385
CAMK1D	11.1455	14.4103	7.21603	14.7502	9.61264	4.77805	12.7043	1.73212		12.0156	-0.800176	0.133368	0.340651
CAMK2D	20.4334	16.4689	24.0534	14.7502	2.40316	7.96341	5.44468	6.92847		17.4472	-1.65748	0.00253928	0.0232941
CAMK2G	52.0122	51.4653	48.1069	39.3339	26.4348	22.2976	30.8532	19.0533		35.2999	-0.956981	0.000888714	0.0108437
CAMK2N2	3.71516	2.05861	7.21603	8.19456	16.8221	0	3.62979	3.46424		4.78756	-0.000520893	0.999438	0.999837
CAMK4	11.1455	18.5275	4.81069	8.19456	2.40316	0	5.44468	0		7.61311	-2.52995	0.00361935	0.0302765
CAMKK1	11.1455	4.11722	9.62138	8.19456	7.20948	9.55609	5.44468	6.92847		7.19782	-0.173689	0.76199	0.883139
CAMKK2	120.743	102.931	139.51	118.002	69.6916	63.7073	72.5957	55.4278		65.1574	-0.881572	2.88166e-05	0.000722201
CAMKMT	13.0031	12.3517	4.81069	14.7502	12.0158	7.96341	5.44468	15.5891		15.6155	-0.194185	0.685253	0.839959
CAMKV	94.7365	80.2858	72.1603	93.418	64.8853	41.4097	59.8915	51.9635		80.771	-0.673269	0.00288172	0.0256551
CAMLG	89.1638	55.5825	81.7817	78.6678	86.5138	100.339	81.6702	81.4095		74.3202	0.19822	0.331263	0.572717
CAMSAP1	271.206	329.378	305.479	258.948	471.019	339.241	353.904	363.745		214.576	0.387907	0.00704468	0.0490104
CAMSAP2	139.318	152.337	67.3496	149.141	185.043	179.973	105.264	164.551		93.3508	0.306277	0.198261	0.430613
CAMSAP3	139.318	98.8133	125.078	129.474	76.9011	58.9293	83.4851	71.0168		77.2002	-0.771373	0.00196952	0.0195047
CAMTA1	29.7213	43.2308	50.5122	39.3339	19.2253	23.8902	29.0383	39.8387		46.5461	-0.497389	0.0729382	0.234095
CAMTA2	11.1455	22.6447	40.8908	32.7783	45.66	31.8536	61.7064	60.6241		21.9022	0.909859	0.015226	0.0826317
CAND1	858.201	802.858	673.496	911.235	571.952	774.044	653.362	741.346		821.03	-0.243436	0.123486	0.324813
CAND2	61.3001	65.8755	84.187	42.6117	33.6442	66.8927	54.4468	50.2314		49.2043	-0.254491	0.307659	0.548802
CANT1	61.3001	72.0514	69.755	62.2787	67.2885	65.3	110.708	71.0168		55.7656	0.253491	0.237445	0.477519
CANX	709.595	652.579	603.741	680.149	934.829	949.239	796.738	1073.91		1342.87	0.503677	0.000405856	0.00596923
CAP1	300.928	284.088	197.238	303.199	350.861	361.539	328.496	407.048		549.899	0.407734	0.00676737	0.0477722
CAP2	11.1455	22.6447	24.0534	37.695	12.0158	11.1488	12.7043	10.3927		24.8198	-1.07147	0.00826971	0.0545956
CAPG	61.3001	49.4066	76.971	50.8063	64.8853	66.8927	59.8915	65.8205		91.1778	0.128132	0.58287	0.775119
CAPN1	351.082	279.971	370.423	322.866	406.134	390.207	361.164	296.192		346.669	0.133326	0.380379	0.618685
CAPN10	79.8759	41.1722	98.6191	45.8896	67.2885	54.1512	99.8191	74.4811		40.9343	0.170562	0.562226	0.760755
CAPN11	1.85758	6.17583	4.81069	6.55565	2.40316	0	1.81489	0		2.22281	-2.37793	0.0534044	0.19055
CAPN12	7.43031	10.2931	7.21603	4.91674	2.40316	3.18536	0	6.92847		5.16347	-1.19921	0.108463	0.298781
CAPN13	7.43031	2.05861	0	1.63891	4.80632	6.37073	0	6.92847		3.70726	0.658316	0.462628	0.686924
CAPN15	352.94	300.557	416.124	275.337	348.458	283.497	484.577	289.264		201.496	0.0665991	0.732043	0.867773
CAPN2	70.588	63.8169	67.3496	59.0009	12.0158	27.0756	16.334	31.1781		44.1837	-1.53604	3.03336e-08	2.06582e-06
CAPN5	63.1577	41.1722	67.3496	55.723	74.498	73.2634	85.3	81.4095		70.3759	0.474144	0.0307212	0.132164
CAPN6	13.0031	18.5275	4.81069	36.0561	26.4348	25.4829	18.1489	15.5891		33.0051	0.146837	0.686711	0.840986
CAPN7	24.1485	24.7033	26.4588	26.2226	31.2411	19.1122	10.8894	24.2496		29.1749	-0.280204	0.434005	0.662464
CAPNS1	128.173	187.334	161.158	127.835	170.624	195.9	176.045	207.854		288.742	0.330368	0.0299565	0.129936
CAPRIN1	845.198	786.389	572.472	663.76	689.707	614.775	542.653	580.259		915.363	-0.245054	0.0752648	0.239255
CAPRIN2	98.4517	111.165	84.187	132.752	52.8695	57.3366	63.5213	62.3562		50.715	-0.859373	0.000298225	0.00477884
CAPZA1	81.7335	121.458	64.9443	106.529	69.6916	76.4488	99.8191	96.9986		195.96	-0.131794	0.506292	0.72054
CAPZA2	120.743	82.3444	57.7283	122.918	76.9011	78.0414	45.3723	86.6059		150.39	-0.438859	0.0793751	0.247057
CAPZB	325.076	306.733	303.073	335.977	285.976	318.536	221.417	284.067		545.319	-0.196861	0.113017	0.30702
CARD10	92.8789	43.2308	79.3763	34.4172	40.8537	49.3732	39.9277	31.1781		38.3045	-0.613878	0.0348659	0.143577
CARD11	117.027	154.396	122.673	90.1402	156.205	167.232	201.453	168.015		89.6345	0.53096	0.00335973	0.028679
CARD19	39.0092	8.23444	19.2428	11.4724	7.20948	7.96341	18.1489	17.3212		16.7832	-0.604609	0.179738	0.408684
CARD8	16.7182	18.5275	26.4588	9.83348	2.40316	7.96341	12.7043	5.19635		10.4776	-1.24768	0.0143091	0.0793676
CARF	7.43031	18.5275	9.62138	8.19456	2.40316	6.37073	10.8894	6.92847		4.69169	-0.665025	0.282817	0.523076
CARHSP1	247.058	232.623	305.479	195.031	305.201	293.054	237.751	268.478		378.521	0.180214	0.238749	0.478911
CARM1	455.107	362.315	423.341	383.506	396.521	385.429	457.353	381.066		398.57	-0.00294851	0.980688	0.990126
CARMIL1	115.17	104.989	74.5657	85.2235	148.996	144.934	137.932	136.837		122.352	0.572604	0.000949028	0.0114349
CARMIL2	42.7243	43.2308	67.3496	36.0561	24.0316	22.2976	41.7425	32.9102		28.9219	-0.615003	0.0409226	0.159206
CARMIL3	14.8606	24.7033	31.2695	26.2226	24.0316	9.55609	16.334	10.3927		11.5944	-0.727339	0.0846302	0.256528
CARNMT1	44.5819	39.1136	33.6748	59.0009	40.8537	44.5951	41.7425	53.6956		51.2744	0.0162758	0.949029	0.975348
CARS2	118.885	102.931	74.5657	83.5845	79.3043	93.9683	116.153	95.2665		81.0896	0.0203824	0.915777	0.962934
CASC3	191.331	238.799	226.102	224.531	285.976	226.161	230.491	251.157		214.104	0.167545	0.206359	0.44138
CASC4	50.1546	59.6997	38.4855	59.0009	43.2569	60.5219	34.483	43.3029		44.4374	-0.193685	0.476143	0.697271
CASD1	65.0153	55.5825	60.1336	70.4732	64.8853	73.2634	79.8553	69.2847		44.8569	0.191303	0.433013	0.661878
CASK	141.176	154.396	134.699	198.308	165.818	146.527	165.155	152.426		185.351	-0.0114836	0.947484	0.974708
CASKIN1	31.5788	16.4689	48.1069	26.2226	12.0158	20.7049	14.5191	8.66059		12.7419	-1.09154	0.0105142	0.0642076
CASKIN2	98.4517	92.6375	93.8084	57.3619	144.19	106.71	156.081	117.784		84.6083	0.622224	0.0029114	0.0258193
CASP10	9.28789	6.17583	7.21603	1.63891	19.2253	3.18536	9.07447	15.5891		9.53744	0.934212	0.114278	0.309159
CASP2	48.297	41.1722	43.2962	52.4452	24.0316	43.0024	43.5574	51.9635		45.3087	-0.16809	0.526222	0.735045
CASP3	81.7335	84.403	84.187	98.3348	182.64	197.493	148.821	202.658		266.645	1.06583	5.52458e-08	3.58697e-06
CASP6	35.294	57.6411	45.7015	42.6117	45.66	50.9658	49.0021	71.0168		64.3674	0.277968	0.260901	0.500886
CASP7	11.1455	4.11722	4.81069	8.19456	4.80632	7.96341	1.81489	5.19635		5.88721	-0.526356	0.422041	0.653906
CASP8	1.85758	10.2931	14.4321	4.91674	21.6284	12.7415	18.1489	20.7854		13.9411	1.28732	0.00964286	0.0606904
CASP8AP2	221.052	214.095	122.673	232.726	278.767	234.124	170.6	271.942		136.028	0.262752	0.252965	0.493155
CASP9	42.7243	57.6411	36.0802	31.1393	31.2411	19.1122	14.5191	38.1066		39.3992	-0.712239	0.0189798	0.0949126
CAST	42.7243	55.5825	33.6748	54.0841	28.8379	43.0024	3.62979	31.1781		43.0926	-0.800588	0.00705249	0.0490154
CASTOR1	3.71516	0	0	3.27783	0	0	3.62979	1.73212		2.94729	-0.478409	0.687531	0.841175
CASTOR2	27.8637	32.9378	48.1069	40.9728	19.2253	23.8902	27.2234	20.7854		38.7238	-0.693435	0.0210313	0.102307
CASTOR3	24.1485	24.7033	16.8374	21.3059	12.0158	4.77805	16.334	24.2496		25.3151	-0.614958	0.115487	0.310951
CASZ1	22.2909	18.5275	38.4855	26.2226	19.2253	43.0024	63.5213	48.4993		23.6088	0.770741	0.0190749	0.095192
CAT	3.71516	6.17583	2.40534	4.91674	12.0158	9.55609	21.7787	10.3927		13.1262	1.61138	0.0079252	0.0531642
CAV1	9.28789	12.3517	26.4588	11.4724	26.4348	46.1878	39.9277	55.4278		41.8963	1.58468	7.6135e-06	0.000240016
CAV2	1.85758	4.11722	4.81069	1.63891	7.20948	3.18536	3.62979	3.46424		4.11105	0.503408	0.566969	0.763288
CAVIN1	37.1516	72.0514	57.7283	75.39	33.6442	62.1146	39.9277	25.9818		58.9383	-0.565381	0.0270628	0.121245
CAVIN3	94.7365	148.22	115.457	83.5845	110.545	129.007	81.6702	83.1416		89.3249	-0.122665	0.677767	0.83462
CAVIN4	14.8606	26.7619	19.2428	11.4724	4.80632	14.3341	14.5191	10.3927		7.4476	-0.651976	0.188632	0.419551
CBARP	27.8637	20.5861	24.0534	32.7783	16.8221	4.77805	19.9638	19.0533		14.7066	-0.83685	0.0433421	0.165484
CBFA2T2	39.0092	26.7619	43.2962	31.1393	40.8537	30.261	61.7064	53.6956		51.3502	0.422914	0.122408	0.323129
CBFA2T3	3.71516	2.05861	12.0267	4.91674	14.419	4.77805	1.81489	1.73212		3.6278	-0.0544049	0.943514	0.973019
CBFB	18.5758	26.7619	40.8908	24.5837	24.0316	31.8536	25.4085	22.5175		43.4448	-0.0471213	0.881803	0.950818
CBL	113.312	152.337	132.294	122.918	100.933	133.785	152.451	138.569		163.542	0.0333331	0.837983	0.925096
CBLB	22.2909	12.3517	7.21603	9.83348	4.80632	11.1488	5.44468	6.92847		11.1357	-0.842066	0.098522	0.282125
CBLC	35.294	26.7619	43.2962	29.5004	12.0158	25.4829	32.6681	19.0533		26.7126	-0.546	0.0945383	0.275438
CBLL1	65.0153	59.6997	48.1069	63.9176	40.8537	50.9658	49.0021	64.0884		58.3705	-0.205834	0.394843	0.631175
CBR1	91.0214	78.2272	84.187	57.3619	33.6442	44.5951	34.483	55.4278		86.0054	-0.8533	0.000170084	0.00309785
CBR3	5.57274	0	9.62138	3.27783	0	7.96341	1.81489	6.92847		4.7561	0.00722648	0.992843	0.996821
CBR4	37.1516	47.348	31.2695	31.1393	40.8537	28.6683	54.4468	57.1599		68.3543	0.302826	0.233721	0.473143
CBS	7.43031	20.5861	21.6481	8.19456	2.40316	7.96341	5.44468	8.66059		13.5367	-1.12531	0.0401194	0.157056
CBSL	7.43031	10.2931	4.81069	8.19456	9.61264	4.77805	5.44468	5.19635		10.446	-0.368218	0.541391	0.747238
CBWD1	1.85758	8.23444	4.81069	6.55565	7.20948	9.55609	1.81489	5.19635		4.98857	0.151544	0.842189	0.926963
CBWD2	11.1455	4.11722	9.62138	9.83348	14.419	11.1488	5.44468	8.66059		7.70715	0.151835	0.779556	0.89197
CBX1	163.467	158.513	173.185	183.558	139.383	176.788	117.968	136.837		265.442	-0.245041	0.136135	0.344419
CBX2	351.082	319.085	411.314	270.421	302.798	262.793	245.011	247.693		245.6	-0.350693	0.0159588	0.0851701
CBX3	152.321	205.861	125.078	185.197	230.703	299.424	165.155	292.728		424.935	0.562198	0.0142595	0.0792045
CBX4	5.57274	6.17583	9.62138	1.63891	9.61264	4.77805	10.8894	19.0533		7.29458	1.00912	0.147362	0.361156
CBX5	79.8759	96.7547	38.4855	139.308	88.9169	114.673	52.6319	98.7307		291.848	-0.0166391	0.950775	0.976416
CBX6	57.5849	61.7583	52.9176	34.4172	31.2411	31.8536	32.6681	27.7139		34.3388	-0.72861	0.00816996	0.0543406
CBY1	7.43031	16.4689	7.21603	14.7502	7.20948	15.9268	12.7043	10.3927		18.4728	0.0280982	0.951012	0.976416
CBY3	5.57274	2.05861	2.40534	6.55565	2.40316	3.18536	0	3.46424		2.1442	-0.906756	0.359865	0.599743
CC2D1A	63.1577	76.1686	84.187	57.3619	72.0948	52.5585	79.8553	53.6956		65.856	-0.117786	0.606221	0.789799
CC2D1B	40.8667	28.8205	38.4855	42.6117	74.498	41.4097	32.6681	32.9102		33.8149	0.222317	0.461102	0.685255
CC2D2A	33.4364	41.1722	33.6748	36.0561	40.8537	46.1878	27.2234	43.3029		32.5865	0.130149	0.642991	0.812076
CCAR1	224.767	279.971	202.049	247.476	346.055	385.429	321.236	401.851		288.507	0.607095	2.80122e-05	0.000706279
CCAR2	351.082	366.433	343.964	319.588	434.972	409.319	379.313	349.888		391.706	0.186356	0.122955	0.323959
CCBE1	7.43031	8.23444	4.81069	0	2.40316	0	1.81489	0		4.09934	-2.40904	0.0357619	0.146114
CCDC102A	26.0061	24.7033	33.6748	22.9448	12.0158	23.8902	32.6681	20.7854		18.6537	-0.221746	0.557466	0.756912
CCDC106	33.4364	34.9964	48.1069	29.5004	55.2727	27.0756	27.2234	24.2496		27.4843	-0.152217	0.625593	0.801082
CCDC107	27.8637	28.8205	21.6481	31.1393	19.2253	36.6317	18.1489	24.2496		19.1824	-0.14302	0.686095	0.840513
CCDC110	5.57274	12.3517	0	3.27783	0	3.18536	0	3.46424		2.88829	-1.56772	0.119054	0.31688
CCDC112	29.7213	24.7033	9.62138	32.7783	31.2411	44.5951	10.8894	32.9102		30.0964	0.275142	0.449432	0.675281
CCDC113	5.57274	4.11722	4.81069	14.7502	2.40316	4.77805	3.62979	5.19635		8.48222	-0.895303	0.189237	0.420076
CCDC115	13.0031	16.4689	21.6481	11.4724	16.8221	20.7049	18.1489	12.1248		23.5932	0.152878	0.725244	0.863207
CCDC117	44.5819	41.1722	38.4855	34.4172	33.6442	50.9658	52.6319	55.4278		54.9439	0.304572	0.253869	0.49375
CCDC12	40.8667	16.4689	14.4321	31.1393	31.2411	36.6317	12.7043	13.8569		52.8032	-0.170016	0.634942	0.80678
CCDC120	24.1485	8.23444	26.4588	14.7502	33.6442	39.8171	38.1128	24.2496		20.8071	0.907338	0.0108448	0.0658095
CCDC122	0	6.17583	4.81069	3.27783	0	0	1.81489	0		3.41809	-2.60844	0.0327569	0.138022
CCDC124	141.176	119.399	74.5657	126.196	136.98	136.971	170.6	131.641		201.478	0.306099	0.12446	0.325998
CCDC126	1.85758	4.11722	0	1.63891	2.40316	3.18536	0	1.73212		3.06282	-0.082834	0.941234	0.971881
CCDC127	27.8637	32.9378	36.0802	26.2226	38.4506	22.2976	32.6681	39.8387		40.2065	0.113322	0.704551	0.851806
CCDC130	27.8637	16.4689	45.7015	34.4172	16.8221	31.8536	49.0021	31.1781		24.9989	0.0887725	0.786108	0.895421
CCDC134	5.57274	2.05861	16.8374	9.83348	16.8221	12.7415	10.8894	13.8569		26.7897	0.686551	0.14591	0.35889
CCDC136	91.0214	104.989	60.1336	72.1122	38.4506	31.8536	49.0021	45.0351		40.8988	-1.00428	6.95095e-05	0.00151219
CCDC137	48.297	69.9927	64.9443	55.723	88.9169	81.2268	99.8191	91.8022		81.6805	0.607073	0.00882174	0.0571293
CCDC138	46.4395	59.6997	16.8374	45.8896	31.2411	35.039	23.5936	43.3029		41.2753	-0.356188	0.278036	0.518
CCDC14	169.04	172.923	149.131	193.392	151.399	189.529	123.413	188.801		117.411	-0.0676403	0.74616	0.87562
CCDC141	9.28789	20.5861	12.0267	13.1113	40.8537	39.8171	18.1489	15.5891		15.8695	1.04551	0.00967962	0.0608912
CCDC142	29.7213	22.6447	28.8641	29.5004	28.8379	17.5195	25.4085	19.0533		15.0603	-0.314801	0.38586	0.623818
CCDC149	9.28789	4.11722	4.81069	16.3891	7.20948	3.18536	3.62979	8.66059		5.15131	-0.698623	0.283624	0.523566
CCDC15	13.0031	6.17583	0	14.7502	16.8221	6.37073	10.8894	12.1248		11.1541	0.298998	0.563335	0.761405
CCDC150	46.4395	47.348	31.2695	40.9728	36.0474	43.0024	38.1128	31.1781		22.0086	-0.167356	0.585589	0.776839
CCDC151	1.85758	2.05861	0	6.55565	0	4.77805	1.81489	1.73212		3.57237	-0.339612	0.721764	0.860964
CCDC152	1.85758	6.17583	7.21603	8.19456	9.61264	3.18536	1.81489	5.19635		12.9302	-0.332423	0.62072	0.798423
CCDC157	7.43031	8.23444	12.0267	4.91674	21.6284	14.3341	19.9638	17.3212		7.75179	1.19873	0.0197884	0.0977021
CCDC160	11.1455	4.11722	2.40534	11.4724	12.0158	6.37073	0	12.1248		8.80831	-0.0481197	0.935641	0.970012
CCDC167	20.4334	16.4689	12.0267	11.4724	14.419	7.96341	18.1489	12.1248		18.6022	-0.224623	0.595216	0.783072
CCDC169	7.43031	4.11722	14.4321	6.55565	2.40316	1.59268	1.81489	3.46424		7.86159	-1.77408	0.0256441	0.117093
CCDC17	1.85758	2.05861	7.21603	4.91674	0	6.37073	3.62979	5.19635		1.99686	0.0214163	0.981933	0.990445
CCDC171	11.1455	22.6447	7.21603	21.3059	21.6284	15.9268	3.62979	17.3212		11.7008	-0.141978	0.767227	0.885687
CCDC174	24.1485	20.5861	16.8374	18.028	36.0474	30.261	25.4085	19.0533		26.8117	0.449543	0.188016	0.418578
CCDC177	35.294	39.1136	21.6481	22.9448	2.40316	6.37073	0	3.46424		10.5872	-3.21647	4.33174e-07	2.07487e-05
CCDC18	37.1516	65.8755	28.8641	55.723	48.0632	31.8536	21.7787	57.1599		28.5937	-0.263731	0.409766	0.643456
CCDC180	26.0061	32.9378	21.6481	13.1113	9.61264	7.96341	12.7043	5.19635		11.3178	-1.40096	0.00331209	0.0283859
CCDC181	7.43031	14.4103	7.21603	14.7502	2.40316	9.55609	3.62979	6.92847		6.74096	-0.913579	0.12387	0.325084
CCDC183	5.57274	2.05861	9.62138	4.91674	7.20948	3.18536	5.44468	5.19635		3.15357	-0.078935	0.925427	0.966618
CCDC186	35.294	55.5825	43.2962	63.9176	28.8379	60.5219	34.483	62.3562		39.0937	-0.070291	0.803773	0.90438
CCDC189	1.85758	4.11722	0	1.63891	7.20948	1.59268	10.8894	1.73212		2.97976	1.41101	0.145275	0.358035
CCDC191	3.71516	4.11722	2.40534	8.19456	0	3.18536	1.81489	6.92847		2.49633	-0.595672	0.497351	0.714072
CCDC22	22.2909	26.7619	38.4855	27.8615	45.66	23.8902	29.0383	34.6424		29.1699	0.195336	0.531328	0.739672
CCDC24	1.85758	6.17583	21.6481	8.19456	12.0158	12.7415	12.7043	8.66059		10.2053	0.368069	0.47548	0.696635
CCDC25	18.5758	43.2308	9.62138	19.667	16.8221	20.7049	7.25957	22.5175		37.1854	-0.433231	0.267929	0.508623
CCDC28A	9.28789	16.4689	14.4321	27.8615	21.6284	17.5195	12.7043	13.8569		16.7777	-0.103397	0.800093	0.902706
CCDC28B	16.7182	26.7619	28.8641	34.4172	16.8221	22.2976	18.1489	12.1248		36.2924	-0.616799	0.0764543	0.241383
CCDC3	3.71516	4.11722	4.81069	0	9.61264	6.37073	7.25957	3.46424		2.76019	1.13007	0.17911	0.408152
CCDC32	11.1455	8.23444	9.62138	13.1113	7.20948	12.7415	14.5191	3.46424		17.5575	-0.14989	0.757456	0.881731
CCDC34	46.4395	72.0514	26.4588	26.2226	38.4506	47.7805	32.6681	45.0351		43.0523	-0.0498479	0.86693	0.942778
CCDC39	5.57274	6.17583	2.40534	3.27783	7.20948	4.77805	14.5191	5.19635		3.67653	0.844074	0.245384	0.485536
CCDC40	13.0031	14.4103	12.0267	13.1113	19.2253	3.18536	3.62979	10.3927		9.44445	-0.639017	0.209319	0.445776
CCDC43	26.0061	34.9964	21.6481	31.1393	43.2569	28.6683	23.5936	34.6424		54.3961	0.157622	0.613696	0.794752
CCDC47	126.315	102.931	48.1069	129.474	156.205	176.788	139.747	199.194		234.879	0.700699	0.00042993	0.00620902
CCDC50	29.7213	32.9378	26.4588	52.4452	55.2727	27.0756	41.7425	41.5708		54.6811	0.158944	0.560057	0.759276
CCDC51	57.5849	37.055	48.1069	60.6398	81.7074	82.8195	101.634	91.8022		75.5925	0.800918	0.000126107	0.00244621
CCDC57	14.8606	16.4689	9.62138	9.83348	19.2253	12.7415	19.9638	24.2496		9.37956	0.577815	0.202472	0.436016
CCDC58	11.1455	34.9964	19.2428	37.695	36.0474	39.8171	9.07447	43.3029		71.2189	0.299069	0.390269	0.626994
CCDC59	68.7304	94.6961	28.8641	77.0289	74.498	70.078	38.1128	58.892		80.458	-0.187044	0.452104	0.677714
CCDC6	115.17	80.2858	91.4031	72.1122	115.352	121.044	119.783	154.158		151.771	0.51775	0.00374293	0.0311025
CCDC61	24.1485	18.5275	24.0534	31.1393	19.2253	4.77805	25.4085	17.3212		22.4301	-0.595646	0.149534	0.36427
CCDC65	5.57274	6.17583	7.21603	1.63891	0	3.18536	3.62979	6.92847		2.3219	-0.469327	0.591845	0.781332
CCDC66	20.4334	45.2894	33.6748	49.1674	26.4348	30.261	23.5936	34.6424		26.5189	-0.370404	0.249937	0.490047
CCDC69	13.0031	4.11722	7.21603	1.63891	4.80632	9.55609	1.81489	5.19635		4.0884	-0.24024	0.763471	0.884119
CCDC71	161.609	113.224	153.942	95.0569	146.593	127.415	137.932	103.927		102.18	-0.0190771	0.916118	0.962996
CCDC71L	44.5819	45.2894	81.7817	39.3339	50.4664	38.2244	47.1872	17.3212		34.3896	-0.458836	0.192118	0.423695
CCDC74A	5.57274	2.05861	9.62138	6.55565	0	3.18536	3.62979	3.46424		2.94333	-1.10918	0.192616	0.423973
CCDC74B	1.85758	8.23444	9.62138	13.1113	2.40316	1.59268	3.62979	3.46424		3.27705	-1.5745	0.0577496	0.20054
CCDC77	39.0092	30.8792	26.4588	31.1393	43.2569	28.6683	23.5936	22.5175		44.7298	-0.159004	0.596534	0.783902
CCDC78	0	12.3517	7.21603	8.19456	2.40316	4.77805	9.07447	6.92847		3.50393	-0.216993	0.77251	0.888429
CCDC8	61.3001	65.8755	79.3763	60.6398	74.498	68.4853	65.3362	76.2132		57.4839	0.097892	0.70809	0.853673
CCDC80	7.43031	6.17583	16.8374	9.83348	21.6284	31.8536	14.5191	31.1781		13.6765	1.35165	0.00336755	0.0287067
CCDC82	24.1485	39.1136	7.21603	29.5004	52.8695	55.7439	27.2234	43.3029		34.5721	0.804059	0.0126473	0.0732364
CCDC84	16.7182	20.5861	19.2428	14.7502	28.8379	17.5195	14.5191	17.3212		14.3813	0.111248	0.774833	0.889389
CCDC85B	182.043	154.396	175.59	139.308	156.205	111.488	170.6	74.4811		96.2967	-0.352526	0.120748	0.320227
CCDC85C	87.3062	51.4653	72.1603	55.723	72.0948	70.078	76.2255	36.3745		48.7078	-0.0696336	0.800183	0.902706
CCDC86	196.903	148.22	120.267	88.5013	146.593	189.529	185.119	150.694		174.983	0.28623	0.148157	0.362467
CCDC88A	323.219	356.14	180.401	347.449	346.055	326.5	215.972	375.87		195.846	0.0602474	0.778288	0.891229
CCDC88B	31.5788	30.8792	31.2695	36.0561	16.8221	14.3341	21.7787	29.446		18.7922	-0.654867	0.0563689	0.197638
CCDC88C	263.776	240.857	286.236	217.975	249.929	208.641	215.972	226.907		177.282	-0.161707	0.288119	0.527796
CCDC9	48.297	43.2308	60.1336	37.695	45.66	36.6317	41.7425	24.2496		42.9554	-0.35245	0.181229	0.409505
CCDC90B	29.7213	49.4066	21.6481	39.3339	26.4348	28.6683	23.5936	31.1781		34.7649	-0.362219	0.222931	0.461216
CCDC91	11.1455	20.5861	4.81069	29.5004	24.0316	22.2976	25.4085	22.5175		26.6846	0.440733	0.231879	0.471013
CCDC93	3.71516	16.4689	12.0267	8.19456	19.2253	9.55609	10.8894	22.5175		18.0964	0.637825	0.181007	0.409505
CCDC97	40.8667	76.1686	67.3496	50.8063	40.8537	47.7805	61.7064	38.1066		51.3614	-0.292995	0.222229	0.460595
CCKBR	42.7243	26.7619	67.3496	39.3339	12.0158	20.7049	14.5191	12.1248		26.1925	-1.53019	9.8941e-05	0.00201927
CCL2	3.71516	4.11722	0	4.91674	0	0	3.62979	0		3.70746	-1.85491	0.123102	0.324211
CCL26	11.1455	10.2931	7.21603	1.63891	0	0	1.81489	3.46424		6.36123	-2.42614	0.0131032	0.0748728
CCL28	1.85758	0	0	0	0	1.59268	5.44468	3.46424		2.26797	2.19162	0.0933309	0.273191
CCM2	44.5819	53.5239	76.971	52.4452	57.6758	57.3366	54.4468	55.4278		38.7566	0.00149211	0.995272	0.99766
CCM2L	35.294	12.3517	21.6481	19.667	2.40316	1.59268	5.44468	10.3927		11.0414	-2.14524	0.000163232	0.0030303
CCN1	39.0092	43.2308	64.9443	47.5285	112.949	101.932	88.9298	102.195		152.452	1.07466	1.78549e-07	9.52083e-06
CCN2	72.4456	86.4616	105.835	45.8896	108.142	106.71	123.413	100.463		146.337	0.525828	0.0184084	0.0930591
CCNA1	1.85758	6.17583	2.40534	4.91674	4.80632	1.59268	1.81489	6.92847		5.46618	-0.0724734	0.927772	0.967655
CCNA2	315.788	300.557	264.588	217.975	353.265	372.688	319.421	377.602		427.484	0.377286	0.00683571	0.0480686
CCNB1	503.404	454.953	380.044	478.563	495.051	568.588	415.611	549.081		818.757	0.156616	0.271695	0.512279
CCNB1IP1	261.919	249.092	300.668	316.31	177.834	176.788	154.266	164.551		121.199	-0.746342	1.81224e-05	0.000486278
CCNB2	196.903	179.099	168.374	236.003	170.624	207.049	157.896	181.872		268.136	-0.126539	0.424854	0.655478
CCNC	81.7335	61.7583	55.3229	70.4732	108.142	86.0049	87.1149	83.1416		98.8263	0.417513	0.0916765	0.270391
CCND1	291.64	277.912	351.18	314.671	122.561	136.971	185.119	173.212		342.879	-0.989823	2.11509e-09	1.89316e-07
CCND2	18.5758	14.4103	19.2428	29.5004	45.66	41.4097	52.6319	43.3029		87.1518	1.13501	0.000785542	0.00980441
CCND3	44.5819	41.1722	67.3496	40.9728	48.0632	57.3366	59.8915	39.8387		50.2198	0.110743	0.650039	0.817061
CCNDBP1	20.4334	39.1136	40.8908	55.723	36.0474	38.2244	23.5936	24.2496		43.4816	-0.369231	0.232955	0.472119
CCNE1	55.7274	53.5239	40.8908	52.4452	50.4664	63.7073	41.7425	43.3029		55.9443	-0.0284554	0.915468	0.962925
CCNE2	7.43031	6.17583	0	4.91674	9.61264	7.96341	7.25957	10.3927		7.98942	0.855569	0.179185	0.408157
CCNF	163.467	144.103	173.185	106.529	165.818	181.566	159.711	150.694		160.544	0.178846	0.279246	0.5192
CCNG1	410.525	463.187	408.908	568.703	326.83	398.171	408.351	445.154		357.958	-0.229627	0.152315	0.367852
CCNG2	13.0031	12.3517	12.0267	13.1113	14.419	9.55609	14.5191	20.7854		9.92997	0.222291	0.642244	0.811532
CCNH	31.5788	32.9378	24.0534	37.695	33.6442	39.8171	41.7425	43.3029		60.3491	0.31835	0.267924	0.508623
CCNI	312.073	337.612	413.719	355.644	271.557	302.61	344.83	301.388		280.86	-0.213301	0.26356	0.502995
CCNJ	79.8759	98.8133	86.5924	72.1122	62.4822	76.4488	63.5213	58.892		57.2811	-0.356446	0.137982	0.347548
CCNJL	66.8728	63.8169	67.3496	57.3619	52.8695	49.3732	58.0766	58.892		46.9233	-0.215065	0.379044	0.618251
CCNK	96.5941	96.7547	115.457	101.613	134.577	133.785	137.932	145.498		150.108	0.43322	0.0198539	0.0978328
CCNL1	105.882	123.517	144.321	121.28	139.383	170.417	145.191	145.498		90.6401	0.291595	0.113529	0.307862
CCNL2	183.9	146.161	165.969	122.918	257.138	218.198	230.491	188.801		121.629	0.531073	0.00246161	0.0228492
CCNQ	22.2909	30.8792	24.0534	13.1113	26.4348	19.1122	30.8532	15.5891		18.3541	0.0311934	0.944525	0.973423
CCNT1	98.4517	111.165	96.2138	99.9737	127.367	124.229	92.5596	143.766		93.8391	0.265299	0.212737	0.449849
CCNT2	107.74	123.517	76.971	127.835	115.352	105.117	114.338	147.23		99.175	0.130044	0.48411	0.703701
CCNY	76.1607	69.9927	84.187	85.2235	88.9169	86.0049	87.1149	76.2132		51.0071	0.0959161	0.645974	0.814274
CCNYL1	40.8667	16.4689	31.2695	29.5004	16.8221	30.261	32.6681	29.446		25.9408	-0.0919696	0.778002	0.891229
CCP110	42.7243	18.5275	21.6481	34.4172	45.66	58.9293	39.9277	51.9635		33.9508	0.72377	0.0167507	0.0877157
CCPG1	26.0061	39.1136	38.4855	39.3339	48.0632	39.8171	41.7425	43.3029		55.4172	0.270368	0.37146	0.611103
CCR10	5.57274	6.17583	9.62138	11.4724	2.40316	3.18536	3.62979	1.73212		4.4353	-1.58086	0.0493797	0.180086
CCS	33.4364	28.8205	31.2695	24.5837	28.8379	14.3341	27.2234	20.7854		37.7089	-0.398246	0.228125	0.466322
CCSAP	29.7213	59.6997	40.8908	34.4172	69.6916	65.3	43.5574	48.4993		55.9762	0.468727	0.0648791	0.216627
CCSER2	57.5849	47.348	48.1069	50.8063	45.66	58.9293	39.9277	50.2314		36.0393	-0.0609049	0.819908	0.914803
CCT2	666.871	605.231	500.312	711.288	603.193	729.449	609.804	706.704		1120.76	0.0910861	0.521555	0.732677
CCT3	1032.81	990.192	745.657	911.235	1076.62	1189.73	1092.57	1103.36		1374.47	0.276348	0.0125226	0.0726831
CCT4	743.031	716.396	659.064	763.733	728.158	754.932	753.181	815.827		1162.21	0.081442	0.492399	0.709958
CCT5	1359.75	1171.35	1075.19	1184.93	1345.77	1485.97	1234.13	1337.19		1640.59	0.17246	0.111223	0.303757
CCT6A	683.589	718.455	485.879	622.787	696.916	756.524	598.915	774.257		967.889	0.169119	0.221657	0.460094
CCT6B	1.85758	0	4.81069	3.27783	2.40316	0	0	0		2.47438	-2.11338	0.100655	0.286468
CCT7	1045.82	988.133	1017.46	885.013	937.232	954.017	983.672	959.593		1284.21	-0.0357545	0.718247	0.858813
CCT8	534.983	621.7	430.557	735.872	639.241	691.224	475.502	685.919		1009.68	0.0975703	0.57137	0.767153
CCZ1	0	0	0	4.91674	2.40316	3.18536	1.81489	3.46424		3.47304	0.937757	0.396087	0.632117
CCZ1B	1.85758	8.23444	2.40534	6.55565	0	6.37073	7.25957	6.92847		6.86064	0.165741	0.813634	0.910916
CD101	11.1455	2.05861	0	1.63891	4.80632	9.55609	3.62979	3.46424		2.95636	0.501613	0.541891	0.747517
CD109	14.8606	16.4689	19.2428	19.667	4.80632	7.96341	12.7043	12.1248		18.0195	-0.865656	0.0508456	0.184093
CD151	102.167	61.7583	108.24	90.1402	62.4822	70.078	79.8553	43.3029		133.935	-0.49799	0.0146487	0.0805005
CD164	52.0122	49.4066	81.7817	62.2787	74.498	74.8561	65.3362	58.892		123.289	0.168289	0.413722	0.646508
CD177	1.85758	0	16.8374	3.27783	2.40316	1.59268	7.25957	1.73212		6.07852	-0.650345	0.443157	0.669544
CD1D	11.1455	2.05861	2.40534	6.55565	0	3.18536	1.81489	3.46424		4.33522	-1.33978	0.149084	0.363741
CD200	57.5849	47.348	55.3229	59.0009	74.498	79.6341	81.6702	98.7307		81.6809	0.610782	0.00563125	0.0421033
CD24	700.307	640.228	654.254	685.066	502.26	530.363	442.834	408.78		1128.26	-0.508988	0.00940231	0.0596861
CD248	13.0031	4.11722	9.62138	6.55565	4.80632	7.96341	10.8894	1.73212		6.73942	-0.371947	0.564513	0.7617
CD276	332.507	230.564	322.316	158.975	153.802	136.971	157.896	131.641		171.766	-0.84371	3.17923e-05	0.00078703
CD2AP	89.1638	125.575	55.3229	114.724	141.786	157.676	128.857	176.676		140.386	0.640152	0.00207672	0.0203625
CD2BP2	91.0214	90.5789	113.051	93.418	86.5138	101.932	99.8191	79.6774		107.96	-0.0637287	0.741994	0.873184
CD320	189.473	111.165	141.915	86.8624	120.158	108.302	185.119	114.32		168.818	-0.000111834	0.999628	0.999876
CD3EAP	92.8789	86.4616	98.6191	78.6678	124.964	124.229	137.932	119.516		116.705	0.514865	0.00522172	0.0398013
CD40	22.2909	14.4103	9.62138	13.1113	2.40316	4.77805	3.62979	5.19635		13.1206	-1.86643	0.00173155	0.0177272
CD44	14.8606	0	9.62138	1.63891	12.0158	7.96341	3.62979	5.19635		11.1146	0.124487	0.835854	0.923902
CD46	105.882	111.165	137.105	124.557	96.1264	90.7829	125.228	103.927		140.182	-0.197806	0.342889	0.58417
CD47	13.0031	18.5275	12.0267	16.3891	7.20948	11.1488	3.62979	17.3212		16.4787	-0.583613	0.208396	0.444276
CD53	0	0	0	0	4.80632	0	0	1.73212		1.89942	1.97755	0.169285	0.393689
CD55	14.8606	34.9964	21.6481	29.5004	21.6284	19.1122	19.9638	25.9818		33.4791	-0.227015	0.500151	0.715743
CD58	7.43031	8.23444	2.40534	6.55565	7.20948	12.7415	0	8.66059		9.04605	0.2122	0.729952	0.866607
CD59	26.0061	26.7619	14.4321	8.19456	4.80632	7.96341	9.07447	8.66059		19.9346	-1.26321	0.0118489	0.0701695
CD63	258.203	294.381	355.991	317.949	297.992	277.127	284.938	235.568		570.424	-0.162542	0.262816	0.502236
CD72	1.85758	6.17583	4.81069	4.91674	0	1.59268	3.62979	1.73212		3.26249	-1.26964	0.201086	0.434224
CD74	14.8606	26.7619	26.4588	26.2226	31.2411	17.5195	39.9277	19.0533		60.5259	0.171266	0.589547	0.779862
CD79B	11.1455	2.05861	0	0	4.80632	6.37073	1.81489	1.73212		3.21237	0.116256	0.899489	0.957945
CD81	286.067	269.678	370.423	239.281	341.249	297.832	361.164	261.55		517.012	0.120265	0.421296	0.653373
CD82	5.57274	14.4103	4.81069	8.19456	2.40316	4.77805	5.44468	5.19635		10.4914	-0.854483	0.18432	0.414191
CD83	5.57274	2.05861	2.40534	4.91674	4.80632	6.37073	1.81489	5.19635		6.12775	0.244015	0.74826	0.876877
CD9	211.764	193.509	223.697	209.781	225.897	299.424	252.27	233.836		539.927	0.277856	0.0666915	0.220446
CD99L2	7.43031	8.23444	2.40534	1.63891	4.80632	12.7415	5.44468	10.3927		6.06864	0.814582	0.219518	0.457526
CDA	5.57274	4.11722	21.6481	14.7502	7.20948	6.37073	10.8894	6.92847		19.9495	-0.524389	0.307327	0.548568
CDADC1	1.85758	6.17583	2.40534	0	0	11.1488	5.44468	1.73212		2.4083	0.950204	0.345275	0.586187
CDAN1	48.297	41.1722	76.971	47.5285	45.66	41.4097	39.9277	39.8387		32.4474	-0.346656	0.236851	0.476938
CDC123	200.618	144.103	141.915	124.557	161.012	189.529	128.857	174.944		241.37	0.100792	0.634548	0.806523
CDC14A	16.7182	12.3517	31.2695	11.4724	12.0158	15.9268	10.8894	10.3927		13.4658	-0.482712	0.264715	0.504202
CDC14B	44.5819	41.1722	43.2962	52.4452	26.4348	25.4829	18.1489	27.7139		23.9585	-0.901846	0.00611551	0.0447103
CDC14C	14.8606	10.2931	2.40534	13.1113	2.40316	3.18536	5.44468	8.66059		5.30128	-1.0611	0.106751	0.296537
CDC16	174.612	183.216	129.889	195.031	252.332	272.349	166.97	211.318		188.572	0.392215	0.0233636	0.110105
CDC20	440.246	384.96	355.991	298.282	516.679	480.99	430.13	446.886		618.084	0.340767	0.00478603	0.0374836
CDC23	87.3062	72.0514	86.5924	109.807	55.2727	65.3	78.0404	69.2847		107.898	-0.410454	0.0469562	0.174343
CDC25A	141.176	123.517	101.024	111.446	204.269	170.417	196.008	126.445		153.704	0.530731	0.00130575	0.0144672
CDC25B	46.4395	55.5825	96.2138	54.0841	50.4664	50.9658	74.4106	55.4278		53.9202	-0.0979601	0.710186	0.854801
CDC25C	24.1485	37.055	43.2962	32.7783	21.6284	36.6317	19.9638	20.7854		38.1227	-0.428697	0.171747	0.397592
CDC26	22.2909	34.9964	26.4588	24.5837	36.0474	27.0756	19.9638	29.446		34.9676	0.0465205	0.898957	0.957568
CDC27	92.8789	117.341	74.5657	99.9737	72.0948	97.1536	83.4851	100.463		110.803	-0.11658	0.527583	0.736289
CDC34	178.328	137.927	144.321	136.03	185.043	170.417	165.155	145.498		152.202	0.153475	0.393051	0.63024
CDC37	289.782	337.612	322.316	276.976	302.798	296.239	263.16	270.21		347.584	-0.112654	0.390512	0.627131
CDC37L1	24.1485	39.1136	31.2695	29.5004	40.8537	65.3	38.1128	50.2314		41.9231	0.674171	0.0241239	0.112673
CDC40	37.1516	34.9964	45.7015	67.1954	43.2569	49.3732	61.7064	45.0351		76.0048	0.0924102	0.701141	0.850264
CDC42	195.046	164.689	156.347	155.697	182.64	194.307	190.564	225.175		405.954	0.240983	0.114487	0.309189
CDC42BPA	113.312	96.7547	67.3496	116.363	81.7074	141.749	114.338	143.766		73.3339	0.290316	0.176768	0.404278
CDC42BPB	430.958	413.781	473.853	445.784	540.711	517.622	607.989	590.652		337.068	0.356971	0.00285617	0.025492
CDC42BPG	42.7243	41.1722	86.5924	36.0561	84.1106	58.9293	125.228	69.2847		46.0125	0.73475	0.0104833	0.0641436
CDC42EP1	16.7182	20.5861	24.0534	37.695	19.2253	15.9268	30.8532	12.1248		15.8506	-0.366195	0.37553	0.615419
CDC42EP2	14.8606	12.3517	12.0267	13.1113	7.20948	12.7415	14.5191	17.3212		14.0819	0.0124189	0.977703	0.988849
CDC42EP3	37.1516	47.348	19.2428	47.5285	24.0316	23.8902	21.7787	29.446		29.7953	-0.637793	0.0340474	0.141838
CDC42EP4	59.4425	39.1136	50.5122	42.6117	48.0632	27.0756	29.0383	34.6424		36.6906	-0.496994	0.0693792	0.22664
CDC42SE1	7.43031	10.2931	4.81069	13.1113	16.8221	19.1122	14.5191	12.1248		31.79	0.763088	0.0949781	0.276054
CDC42SE2	3.71516	0	7.21603	3.27783	7.20948	14.3341	7.25957	8.66059		18.6139	1.49081	0.024332	0.113347
CDC45	70.588	65.8755	33.6748	60.6398	67.2885	65.3	50.817	45.0351		65.5475	-0.0355021	0.903581	0.958642
CDC5L	185.758	156.454	101.024	157.336	216.284	194.307	114.338	221.711		210.076	0.301533	0.148591	0.362961
CDC6	183.9	201.744	141.915	201.586	201.865	195.9	152.451	209.586		213.884	0.0484703	0.757162	0.881731
CDC7	102.167	111.165	113.051	145.863	103.336	103.524	61.7064	129.909		141.585	-0.250299	0.23554	0.475213
CDC73	59.4425	69.9927	45.7015	70.4732	105.739	92.3756	61.7064	81.4095		113.907	0.445957	0.0344798	0.142549
CDCA2	161.609	156.454	163.563	213.059	209.075	216.605	201.453	254.621		178.813	0.338539	0.0382033	0.15285
CDCA3	57.5849	61.7583	74.5657	63.9176	33.6442	50.9658	85.3	57.1599		89.9337	-0.151713	0.494853	0.711898
CDCA4	174.612	168.806	175.59	152.419	163.415	151.305	156.081	152.426		176.74	-0.106754	0.542532	0.747741
CDCA5	87.3062	98.8133	115.457	65.5565	110.545	119.451	107.079	71.0168		121.288	0.168605	0.438244	0.666027
CDCA7	161.609	179.099	125.078	150.78	180.237	189.529	157.896	143.766		168.373	0.115353	0.449907	0.675831
CDCA7L	198.761	244.975	202.049	237.642	271.557	315.351	254.085	242.496		273.442	0.293416	0.0441869	0.167347
CDCA8	48.297	34.9964	38.4855	45.8896	60.079	62.1146	36.2979	55.4278		87.0266	0.334821	0.151396	0.366384
CDCP1	29.7213	34.9964	55.3229	40.9728	45.66	33.4463	38.1128	24.2496		38.5481	-0.192384	0.50447	0.718762
CDH1	464.395	487.891	582.093	591.647	408.537	415.69	470.057	478.064		805.206	-0.26111	0.109754	0.300947
CDH11	40.8667	39.1136	31.2695	18.028	14.419	9.55609	3.62979	5.19635		18.3694	-2.02279	8.97832e-06	0.000273076
CDH12	5.57274	0	4.81069	3.27783	7.20948	7.96341	0	10.3927		3.69725	0.910961	0.261529	0.501133
CDH2	159.752	179.099	177.995	198.308	72.0948	97.1536	81.6702	95.2665		204.205	-1.03582	5.79742e-08	3.72551e-06
CDH23	13.0031	24.7033	7.21603	21.3059	14.419	23.8902	19.9638	17.3212		12.347	0.181513	0.657625	0.821924
CDH24	79.8759	96.7547	117.862	49.1674	16.8221	49.3732	41.7425	43.3029		35.5162	-1.13903	0.000541642	0.00748326
CDH26	1.85758	4.11722	7.21603	3.27783	7.20948	4.77805	0	6.92847		4.36986	0.229247	0.773336	0.888796
CDH3	332.507	370.55	418.53	363.839	418.15	434.802	519.059	356.816		548.752	0.221689	0.180364	0.408971
CDH4	13.0031	12.3517	7.21603	1.63891	21.6284	27.0756	23.5936	3.46424		16.3159	1.17501	0.0175968	0.0904454
CDH6	18.5758	10.2931	16.8374	18.028	19.2253	22.2976	14.5191	6.92847		18.2659	-0.0342218	0.936787	0.970636
CDH8	3.71516	8.23444	9.62138	8.19456	2.40316	7.96341	9.07447	3.46424		6.12503	-0.311827	0.632809	0.805443
CDH9	1.85758	0	2.40534	9.83348	0	0	0	0		2.26767	-3.45009	0.00760141	0.0516838
CDHR1	14.8606	10.2931	16.8374	29.5004	7.20948	12.7415	9.07447	1.73212		11.7675	-1.22954	0.0124441	0.0725604
CDIPT	50.1546	57.6411	76.971	36.0561	86.5138	62.1146	88.9298	79.6774		58.7385	0.544736	0.0258868	0.117788
CDK1	208.049	191.451	245.345	254.031	204.269	148.119	183.304	181.872		333.253	-0.332602	0.0712493	0.230571
CDK10	31.5788	30.8792	52.9176	36.0561	36.0474	47.7805	58.0766	38.1066		33.4094	0.278778	0.346193	0.587338
CDK11A	20.4334	16.4689	28.8641	29.5004	24.0316	22.2976	29.0383	19.0533		16.8052	-0.0200179	0.955601	0.978866
CDK11B	74.3031	55.5825	55.3229	36.0561	64.8853	58.9293	56.2617	77.9453		50.5865	0.231294	0.328222	0.569479
CDK12	384.519	296.44	245.345	293.365	437.375	447.544	388.387	422.637		292.157	0.468534	0.0002628	0.00433308
CDK13	169.04	216.154	197.238	226.17	218.688	210.234	266.789	251.157		167.142	0.227085	0.14274	0.354659
CDK14	68.7304	63.8169	48.1069	52.4452	79.3043	46.1878	70.7808	64.0884		58.1625	0.136218	0.578333	0.77185
CDK16	289.782	321.143	428.151	301.56	398.925	262.793	346.645	337.763		194.697	0.00609778	0.975479	0.987789
CDK17	31.5788	18.5275	36.0802	34.4172	16.8221	31.8536	25.4085	36.3745		48.5927	-0.0948683	0.764323	0.884616
CDK18	55.7274	72.0514	67.3496	65.5565	38.4506	27.0756	32.6681	39.8387		50.8716	-0.92583	0.000964521	0.0116077
CDK19	9.28789	2.05861	9.62138	14.7502	2.40316	1.59268	1.81489	1.73212		4.3014	-2.30403	0.00939472	0.0596682
CDK2	40.8667	74.11	50.5122	54.0841	33.6442	36.6317	58.0766	41.5708		72.8378	-0.356004	0.138114	0.347714
CDK20	3.71516	8.23444	7.21603	4.91674	0	4.77805	7.25957	3.46424		4.53119	-0.528092	0.47494	0.696472
CDK2AP1	195.046	148.22	149.131	154.058	110.545	148.119	132.487	145.498		148.447	-0.26437	0.27157	0.512174
CDK2AP2	37.1516	34.9964	36.0802	42.6117	43.2569	33.4463	41.7425	38.1066		47.1155	0.0311914	0.906122	0.959304
CDK3	13.0031	18.5275	36.0802	11.4724	16.8221	12.7415	14.5191	6.92847		8.5631	-0.608983	0.21495	0.452599
CDK4	332.507	306.733	274.209	316.31	348.458	363.132	306.717	310.049		316.629	0.106801	0.447209	0.672908
CDK5	24.1485	24.7033	19.2428	9.83348	14.419	11.1488	29.0383	25.9818		24.9491	0.0809041	0.825343	0.91798
CDK5R1	29.7213	34.9964	31.2695	22.9448	26.4348	17.5195	27.2234	17.3212		16.5754	-0.434566	0.236369	0.476426
CDK5RAP1	78.0183	119.399	79.3763	83.5845	103.336	95.5609	114.338	95.2665		111.582	0.18054	0.343299	0.584574
CDK5RAP2	170.897	177.04	156.347	262.226	189.85	203.863	177.86	190.533		167.883	-0.0219155	0.890344	0.953571
CDK5RAP3	57.5849	80.2858	139.51	91.7791	50.4664	70.078	76.2255	57.1599		85.8971	-0.506792	0.0265467	0.119863
CDK6	20.4334	22.6447	14.4321	34.4172	12.0158	4.77805	7.25957	8.66059		20.2361	-1.58395	0.000502233	0.00703969
CDK7	44.5819	51.4653	28.8641	50.8063	57.6758	49.3732	54.4468	55.4278		68.8165	0.274143	0.255399	0.495438
CDK8	29.7213	28.8205	21.6481	40.9728	24.0316	33.4463	32.6681	38.1066		32.1722	0.070744	0.810064	0.908115
CDK9	159.752	133.81	146.726	140.946	132.174	114.673	134.302	117.784		159.194	-0.226745	0.164393	0.386131
CDKAL1	31.5788	22.6447	16.8374	44.2506	31.2411	36.6317	29.0383	38.1066		62.4893	0.183539	0.521117	0.732241
CDKL3	3.71516	4.11722	0	0	0	0	5.44468	5.19635		2.85813	0.48727	0.647902	0.815719
CDKL5	35.294	55.5825	43.2962	34.4172	50.4664	54.1512	52.6319	55.4278		40.0824	0.354353	0.172367	0.398144
CDKN1A	9.28789	10.2931	14.4321	9.83348	4.80632	6.37073	9.07447	1.73212		7.663	-0.971162	0.122587	0.323534
CDKN1B	63.1577	49.4066	60.1336	60.6398	45.66	46.1878	45.3723	62.3562		63.4035	-0.222605	0.349214	0.590004
CDKN1C	1.85758	0	7.21603	6.55565	0	0	3.62979	0		1.39691	-2.0518	0.147978	0.3621
CDKN2AIP	89.1638	55.5825	96.2138	62.2787	81.7074	89.1902	58.0766	62.3562		64.9409	-0.0466031	0.829443	0.920778
CDKN2AIPNL	61.3001	30.8792	55.3229	50.8063	45.66	57.3366	43.5574	38.1066		59.5204	-0.100031	0.717662	0.858655
CDKN2D	1.85758	4.11722	7.21603	4.91674	12.0158	4.77805	10.8894	3.46424		6.00334	0.765354	0.284003	0.523824
CDKN3	39.0092	34.9964	28.8641	62.2787	24.0316	23.8902	29.0383	53.6956		49.9666	-0.35573	0.23066	0.469907
CDO1	14.8606	34.9964	19.2428	13.1113	7.20948	6.37073	3.62979	10.3927		17.3207	-1.54785	0.0014207	0.015427
CDON	57.5849	78.2272	69.755	59.0009	62.4822	82.8195	107.079	79.6774		63.7669	0.348544	0.12879	0.333299
CDPF1	1.85758	4.11722	7.21603	3.27783	9.61264	3.18536	5.44468	3.46424		5.29987	0.384161	0.60745	0.790442
CDR1	3.71516	14.4103	19.2428	13.1113	9.61264	6.37073	9.07447	8.66059		5.39647	-0.569597	0.330956	0.572503
CDR2	52.0122	34.9964	76.971	63.9176	74.498	87.5975	59.8915	77.9453		67.4761	0.409935	0.0604266	0.206211
CDR2L	53.8698	80.2858	91.4031	96.6958	60.079	71.6707	56.2617	48.4993		44.623	-0.441583	0.0594978	0.204211
CDRT4	14.8606	8.23444	7.21603	4.91674	7.20948	11.1488	3.62979	10.3927		4.70656	-0.100061	0.871098	0.945571
CDS1	18.5758	32.9378	14.4321	11.4724	36.0474	23.8902	25.4085	20.7854		23.2114	0.443076	0.219535	0.457526
CDS2	78.0183	65.8755	86.5924	70.4732	76.9011	76.4488	72.5957	58.892		105.753	-0.075876	0.697612	0.848386
CDT1	338.079	347.905	401.692	285.171	382.102	283.497	399.277	299.656		318.147	-0.0082887	0.962878	0.981999
CDV3	115.17	142.044	149.131	155.697	185.043	221.383	148.821	202.658		206.795	0.436681	0.0075706	0.0515303
CDX4	9.28789	2.05861	12.0267	9.83348	12.0158	15.9268	27.2234	12.1248		10.9579	1.03411	0.0398552	0.156718
CDYL	211.764	220.271	144.321	186.836	197.059	164.046	139.747	183.604		151.381	-0.170065	0.308172	0.549395
CDYL2	3.71516	2.05861	7.21603	6.55565	4.80632	3.18536	7.25957	1.73212		4.49517	-0.223724	0.778823	0.891517
CEBPA	13.0031	14.4103	16.8374	3.27783	4.80632	1.59268	7.25957	10.3927		5.72823	-0.942602	0.139914	0.350675
CEBPB	113.312	129.692	168.374	91.7791	69.6916	70.078	87.1149	60.6241		69.4144	-0.792286	0.000626602	0.0082652
CEBPD	18.5758	4.11722	16.8374	9.83348	2.40316	14.3341	12.7043	6.92847		7.04021	-0.381325	0.529567	0.738071
CEBPG	72.4456	63.8169	45.7015	60.6398	67.2885	35.039	39.9277	34.6424		59.1206	-0.513049	0.0359151	0.146597
CEBPZ	445.819	580.528	394.476	472.007	617.612	713.522	442.834	704.972		534.338	0.38905	0.016127	0.0857393
CEBPZOS	24.1485	6.17583	9.62138	19.667	16.8221	12.7415	10.8894	22.5175		25.1132	0.0255946	0.952395	0.977273
CECR2	395.664	407.605	473.853	349.088	608	587.7	686.03	637.419		452.292	0.637602	1.63535e-06	6.36415e-05
CEL	13.0031	12.3517	4.81069	3.27783	9.61264	3.18536	10.8894	17.3212		5.24812	0.290609	0.654302	0.820304
CELF1	163.467	174.982	168.374	193.392	211.478	213.419	208.713	174.944		321.872	0.200151	0.138131	0.347714
CELF2	40.8667	61.7583	45.7015	39.3339	38.4506	17.5195	14.5191	19.0533		36.3279	-1.12035	0.000286405	0.0046309
CELF4	1.85758	2.05861	0	3.27783	0	4.77805	1.81489	0		2.26941	-0.0941444	0.939043	0.971448
CELF5	14.8606	8.23444	19.2428	14.7502	12.0158	1.59268	3.62979	0		7.16191	-1.9039	0.00468458	0.0369663
CELSR1	232.197	230.564	389.666	247.476	165.818	156.083	235.936	147.23		132.104	-0.636952	0.0110834	0.0668044
CELSR2	334.364	304.674	353.586	311.393	235.51	237.31	290.383	268.478		187.517	-0.332813	0.0130067	0.0745593
CELSR3	306.5	317.026	555.634	350.727	235.51	207.049	281.308	228.64		187.578	-0.679243	0.00112267	0.0129661
CEMIP	5.57274	8.23444	7.21603	4.91674	14.419	7.96341	5.44468	5.19635		4.45003	0.318309	0.62442	0.800852
CEMIP2	176.47	150.279	161.158	214.698	233.107	265.978	174.23	221.711		156.037	0.342177	0.051041	0.184587
CEMP1	40.8667	24.7033	33.6748	18.028	28.8379	20.7049	61.7064	19.0533		15.611	0.157701	0.707486	0.853432
CEND1	5.57274	4.11722	0	0	16.8221	17.5195	19.9638	8.66059		9.49306	2.68392	0.000420969	0.00610524
CENPA	13.0031	10.2931	21.6481	26.2226	33.6442	20.7049	27.2234	20.7854		24.5313	0.481668	0.18894	0.419836
CENPB	356.655	234.682	324.721	206.503	247.526	181.566	219.602	140.302		142.074	-0.511813	0.0431836	0.16503
CENPBD1	11.1455	10.2931	2.40534	0	31.2411	14.3341	7.25957	27.7139		8.71382	1.74372	0.00321823	0.0277547
CENPC	44.5819	61.7583	45.7015	50.8063	45.66	76.4488	36.2979	86.6059		50.6501	0.293977	0.253863	0.49375
CENPE	219.194	253.209	153.942	311.393	223.494	191.122	130.672	252.889		192.073	-0.238391	0.409297	0.643123
CENPF	1261.3	1412.21	1067.97	1519.27	1742.29	1794.95	1210.53	1931.31		1148.64	0.343227	0.0434736	0.165936
CENPH	72.4456	69.9927	81.7817	54.0841	43.2569	57.3366	36.2979	50.2314		96.367	-0.546742	0.0277849	0.123729
CENPI	39.0092	47.348	45.7015	52.4452	38.4506	31.8536	36.2979	45.0351		44.3515	-0.29078	0.286	0.525802
CENPJ	124.458	174.982	86.5924	142.585	139.383	132.193	63.5213	159.355		100.229	-0.104085	0.674143	0.832121
CENPK	22.2909	32.9378	19.2428	31.1393	19.2253	27.0756	12.7043	34.6424		46.2559	-0.166759	0.620186	0.798147
CENPL	18.5758	20.5861	24.0534	22.9448	24.0316	19.1122	16.334	17.3212		20.3303	-0.181702	0.610658	0.792599
CENPM	52.0122	39.1136	45.7015	29.5004	48.0632	35.039	45.3723	29.446		59.2243	-0.0811725	0.78299	0.893999
CENPN	55.7274	51.4653	40.8908	62.2787	57.6758	49.3732	39.9277	53.6956		46.2294	-0.092229	0.728056	0.865296
CENPO	35.294	41.1722	45.7015	45.8896	64.8853	57.3366	50.817	38.1066		50.4083	0.318995	0.255699	0.495754
CENPP	7.43031	2.05861	4.81069	16.3891	14.419	12.7415	5.44468	8.66059		13.8672	0.313732	0.550294	0.752054
CENPQ	11.1455	14.4103	2.40534	11.4724	9.61264	4.77805	3.62979	10.3927		18.3132	-0.551262	0.313805	0.55486
CENPS	3.71516	4.11722	4.81069	8.19456	0	6.37073	3.62979	1.73212		4.73589	-0.746587	0.352025	0.591794
CENPT	96.5941	57.6411	144.321	78.6678	100.933	71.6707	94.3745	84.8738		80.2316	-0.0920947	0.676869	0.834335
CENPU	139.318	146.161	81.7817	129.474	117.755	146.527	74.4106	103.927		138.096	-0.173848	0.41077	0.643837
CENPV	484.828	364.374	331.937	314.671	300.395	230.939	264.974	176.676		263.637	-0.624314	0.0222319	0.106539
CENPVL3	11.1455	14.4103	21.6481	8.19456	2.40316	4.77805	0	3.46424		5.59752	-2.2992	0.00246449	0.022859
CENPW	39.0092	47.348	31.2695	26.2226	31.2411	28.6683	25.4085	31.1781		68.3833	-0.300836	0.330313	0.571628
CENPX	35.294	20.5861	26.4588	14.7502	26.4348	28.6683	19.9638	8.66059		31.9968	-0.213275	0.611331	0.79294
CEP104	37.1516	53.5239	45.7015	36.0561	48.0632	47.7805	65.3362	45.0351		39.9726	0.273725	0.285407	0.525356
CEP112	7.43031	8.23444	2.40534	3.27783	7.20948	3.18536	5.44468	6.92847		5.48518	0.0515925	0.940099	0.971881
CEP120	48.297	78.2272	67.3496	81.9456	31.2411	57.3366	72.5957	64.0884		47.4461	-0.269497	0.2732	0.513264
CEP126	1.85758	8.23444	12.0267	16.3891	4.80632	3.18536	0	0		3.16672	-2.36643	0.0169338	0.0882916
CEP128	24.1485	26.7619	16.8374	29.5004	33.6442	22.2976	14.5191	22.5175		18.8863	-0.117807	0.740995	0.872478
CEP131	74.3031	76.1686	86.5924	57.3619	79.3043	74.8561	85.3	77.9453		61.9291	0.120672	0.609289	0.791602
CEP135	39.0092	55.5825	26.4588	32.7783	33.6442	49.3732	41.7425	88.338		41.3451	0.486776	0.106751	0.296537
CEP152	53.8698	49.4066	28.8641	55.723	57.6758	79.6341	29.0383	65.8205		43.1447	0.297543	0.427096	0.657082
CEP162	24.1485	30.8792	21.6481	27.8615	26.4348	19.1122	7.25957	32.9102		20.2125	-0.303903	0.436196	0.664056
CEP164	27.8637	45.2894	45.7015	34.4172	43.2569	38.2244	29.0383	27.7139		27.1767	-0.144783	0.611461	0.792965
CEP170	11.1455	8.23444	2.40534	11.4724	12.0158	11.1488	1.81489	3.46424		8.80528	-0.321802	0.579206	0.772581
CEP170B	226.625	177.04	276.615	168.808	199.462	208.641	219.602	216.515		130.517	0.00435487	0.979366	0.989473
CEP192	133.746	156.454	158.753	183.558	170.624	167.232	127.043	136.837		121.003	-0.0790315	0.65669	0.821476
CEP250	130.031	144.103	146.726	150.78	213.881	144.934	179.674	180.14		103.808	0.319127	0.0638665	0.214112
CEP290	27.8637	45.2894	33.6748	83.5845	52.8695	44.5951	27.2234	50.2314		33.7942	-0.147815	0.689741	0.84236
CEP295	98.4517	86.4616	50.5122	113.085	108.142	92.3756	81.6702	135.105		61.242	0.242947	0.377258	0.616627
CEP350	254.488	249.092	177.995	245.837	216.284	213.419	163.34	242.496		135.484	-0.156294	0.398062	0.633814
CEP41	14.8606	4.11722	9.62138	16.3891	14.419	12.7415	10.8894	15.5891		19.1395	0.201192	0.65137	0.817867
CEP44	5.57274	16.4689	12.0267	21.3059	9.61264	15.9268	5.44468	24.2496		21.5249	0.0100857	0.981119	0.990286
CEP55	29.7213	45.2894	21.6481	52.4452	38.4506	25.4829	30.8532	39.8387		42.5093	-0.189916	0.533877	0.74144
CEP57	102.167	78.2272	60.1336	90.1402	81.7074	68.4853	65.3362	77.9453		83.3608	-0.197464	0.348792	0.58992
CEP57L1	5.57274	10.2931	21.6481	16.3891	7.20948	22.2976	3.62979	5.19635		15.1051	-0.405412	0.401091	0.636534
CEP63	20.4334	24.7033	12.0267	31.1393	28.8379	17.5195	10.8894	31.1781		25.3099	-0.0578619	0.873329	0.946653
CEP68	113.312	92.6375	108.24	73.7511	64.8853	58.9293	54.4468	38.1066		61.8701	-0.84513	0.000147428	0.00278227
CEP70	37.1516	37.055	28.8641	32.7783	43.2569	36.6317	34.483	51.9635		36.3432	0.282539	0.311437	0.55268
CEP72	44.5819	34.9964	62.5389	52.4452	38.4506	44.5951	43.5574	31.1781		36.7002	-0.29067	0.257902	0.497348
CEP76	29.7213	26.7619	48.1069	54.0841	28.8379	50.9658	47.1872	46.7672		51.2434	0.148565	0.612909	0.794164
CEP78	91.0214	100.872	103.43	95.0569	122.561	101.932	92.5596	96.9986		82.7065	0.0793716	0.698867	0.849134
CEP83	18.5758	30.8792	16.8374	34.4172	28.8379	31.8536	30.8532	39.8387		24.6146	0.369926	0.328646	0.569848
CEP85	74.3031	107.048	72.1603	72.1122	91.3201	78.0414	83.4851	88.338		90.2553	0.065205	0.740681	0.872419
CEP85L	11.1455	20.5861	21.6481	24.5837	21.6284	27.0756	21.7787	31.1781		18.8396	0.396333	0.277454	0.517532
CEP89	20.4334	18.5275	26.4588	16.3891	24.0316	19.1122	19.9638	24.2496		24.6234	0.110111	0.749881	0.877623
CEP95	78.0183	86.4616	50.5122	59.0009	96.1264	97.1536	68.9659	79.6774		58.0339	0.3123	0.198008	0.430352
CEP97	42.7243	47.348	9.62138	31.1393	28.8379	39.8171	21.7787	31.1781		38.631	-0.121265	0.694833	0.846029
CEPT1	29.7213	30.8792	33.6748	37.695	24.0316	27.0756	21.7787	43.3029		46.553	-0.17389	0.575374	0.770135
CER1	33.4364	30.8792	214.076	222.892	52.8695	20.7049	239.566	173.212		154.295	-0.0426496	0.961206	0.981092
CERCAM	16.7182	16.4689	40.8908	16.3891	12.0158	6.37073	14.5191	5.19635		13.3871	-1.24036	0.00869841	0.0565435
CERK	137.461	150.279	149.131	86.8624	86.5138	63.7073	78.0404	45.0351		75.5724	-0.944492	2.47975e-05	0.000638064
CERS1	42.7243	37.055	64.9443	26.2226	26.4348	22.2976	16.334	13.8569		28.7067	-1.10607	0.0017694	0.0180116
CERS2	224.767	269.678	286.236	288.449	269.154	280.312	270.419	213.05		245.323	-0.0495858	0.707095	0.853295
CERS4	113.312	92.6375	223.697	126.196	100.933	105.117	156.081	136.837		131.798	-0.141105	0.58832	0.778813
CERS5	85.4486	55.5825	64.9443	88.5013	100.933	58.9293	52.6319	36.3745		67.2391	-0.288417	0.268751	0.509488
CERS6	16.7182	30.8792	48.1069	24.5837	40.8537	49.3732	52.6319	57.1599		53.9132	0.79816	0.00295566	0.0260483
CERT1	46.4395	63.8169	60.1336	108.168	120.158	87.5975	116.153	98.7307		124.465	0.567333	0.00753554	0.0514033
CES2	37.1516	63.8169	52.9176	54.0841	4.80632	14.3341	12.7043	13.8569		16.371	-2.12936	4.87156e-08	3.1961e-06
CES3	3.71516	6.17583	2.40534	1.63891	0	4.77805	5.44468	0		2.4585	-0.347972	0.722866	0.861541
CETN2	37.1516	22.6447	24.0534	29.5004	36.0474	28.6683	30.8532	24.2496		57.9112	0.0441862	0.883261	0.95106
CETN3	24.1485	20.5861	28.8641	39.3339	12.0158	19.1122	9.07447	13.8569		46.5205	-1.05567	0.00476895	0.0373732
CFAP20	52.0122	51.4653	55.3229	52.4452	81.7074	55.7439	52.6319	57.1599		80.6663	0.20542	0.373221	0.61266
CFAP298	14.8606	28.8205	9.62138	22.9448	14.419	20.7049	30.8532	17.3212		41.0762	0.120149	0.738205	0.870877
CFAP36	9.28789	14.4103	21.6481	24.5837	33.6442	14.3341	16.334	19.0533		23.2408	0.193718	0.606678	0.789929
CFAP410	13.0031	12.3517	19.2428	16.3891	24.0316	12.7415	39.9277	17.3212		16.8834	0.617705	0.143322	0.355156
CFAP46	11.1455	8.23444	2.40534	9.83348	9.61264	9.55609	5.44468	6.92847		6.64159	-0.0604276	0.920936	0.964985
CFAP58	3.71516	6.17583	4.81069	3.27783	4.80632	3.18536	0	5.19635		2.39042	-0.451598	0.629018	0.803161
CFAP69	3.71516	6.17583	0	8.19456	0	3.18536	0	0		1.90073	-2.36551	0.056009	0.197046
CFAP97	59.4425	82.3444	81.7817	124.557	62.4822	62.1146	41.7425	55.4278		73.469	-0.667747	0.00385936	0.0318168
CFDP1	74.3031	86.4616	72.1603	80.3067	57.6758	76.4488	52.6319	102.195		124.271	-0.102427	0.638286	0.809077
CFL1	1213	1076.65	1077.59	1035.79	1112.66	1172.21	1137.94	1039.27		2272.21	0.0193408	0.86814	0.943755
CFL2	7.43031	4.11722	9.62138	16.3891	16.8221	7.96341	5.44468	22.5175		18.5248	0.434047	0.414892	0.647328
CFLAR	5.57274	18.5275	2.40534	3.27783	7.20948	17.5195	21.7787	25.9818		13.5676	1.33209	0.0136392	0.077127
CFP	1.85758	6.17583	2.40534	1.63891	12.0158	4.77805	1.81489	1.73212		3.44472	0.686544	0.435098	0.663044
CGAS	0	2.05861	0	0	9.61264	12.7415	9.07447	10.3927		5.23598	4.13984	0.000222418	0.00379777
CGGBP1	81.7335	59.6997	67.3496	91.7791	60.079	68.4853	61.7064	62.3562		68.8621	-0.259914	0.264101	0.503428
CGN	198.761	164.689	165.969	172.086	189.85	136.971	130.672	131.641		119.964	-0.272257	0.0884001	0.263886
CGNL1	221.052	255.268	271.804	270.421	249.929	250.051	190.564	247.693		239.16	-0.118243	0.479346	0.699998
CGREF1	5.57274	2.05861	0	1.63891	0	1.59268	1.81489	0		3.05922	-1.38609	0.270968	0.511929
CGRRF1	31.5788	45.2894	33.6748	59.0009	52.8695	25.4829	38.1128	31.1781		32.3862	-0.254989	0.388119	0.625827
CHAC1	37.1516	63.8169	91.4031	49.1674	26.4348	27.0756	21.7787	22.5175		43.416	-1.2901	0.000825072	0.0102164
CHAC2	5.57274	16.4689	7.21603	24.5837	4.80632	22.2976	3.62979	24.2496		22.5617	0.0513054	0.907888	0.959981
CHAF1A	378.946	407.605	348.775	314.671	425.359	461.878	430.13	394.923		348.847	0.243695	0.0357364	0.146078
CHAF1B	63.1577	55.5825	50.5122	47.5285	43.2569	57.3366	21.7787	38.1066		68.2838	-0.426087	0.110604	0.302813
CHAMP1	202.476	164.689	187.617	173.725	228.3	224.568	230.491	275.407		188.463	0.398804	0.00541254	0.0409816
CHCHD1	66.8728	125.575	64.9443	91.7791	96.1264	98.7463	99.8191	128.177		126.025	0.275628	0.244614	0.484656
CHCHD2	169.04	179.099	132.294	116.363	362.877	273.941	366.608	287.532		503.745	1.11201	7.76068e-06	0.000241913
CHCHD3	111.455	86.4616	57.7283	99.9737	100.933	109.895	83.4851	122.98		152.694	0.214689	0.29365	0.533838
CHCHD4	27.8637	28.8205	21.6481	22.9448	12.0158	14.3341	12.7043	25.9818		30.4899	-0.619964	0.098371	0.281974
CHCHD5	27.8637	37.055	38.4855	24.5837	38.4506	44.5951	32.6681	31.1781		31.1433	0.221847	0.484862	0.704278
CHCHD6	20.4334	43.2308	48.1069	42.6117	31.2411	27.0756	16.334	20.7854		47.1111	-0.698167	0.0236402	0.111033
CHCHD7	11.1455	12.3517	4.81069	8.19456	2.40316	11.1488	7.25957	8.66059		20.2564	-0.25455	0.635482	0.807074
CHD1	185.758	234.682	144.321	239.281	213.881	234.124	143.377	244.229		203.33	0.0486859	0.792933	0.899045
CHD1L	209.906	203.802	190.022	227.809	218.688	181.566	186.934	207.854		180.758	-0.0785891	0.565441	0.7623
CHD2	111.455	133.81	113.051	145.863	144.19	149.712	130.672	145.498		110.771	0.172405	0.404793	0.638769
CHD3	235.912	191.451	230.913	170.447	122.561	113.08	141.562	95.2665		100.027	-0.809469	7.09984e-06	0.00022696
CHD4	195.046	199.685	149.131	172.086	165.818	167.232	156.081	174.944		159.041	-0.112551	0.457759	0.682432
CHD5	5.57274	2.05861	0	11.4724	4.80632	3.18536	3.62979	6.92847		2.94929	-0.1476	0.860041	0.938288
CHD6	304.643	358.198	355.991	342.533	295.589	323.315	254.085	313.513		214.555	-0.194339	0.147546	0.361538
CHD7	808.047	850.206	675.902	789.956	547.921	574.958	602.545	659.937		522.804	-0.389206	0.000674997	0.0087561
CHD8	460.68	545.532	454.61	473.646	550.324	598.849	571.691	580.259		435.92	0.252148	0.0267195	0.12031
CHD9	191.331	162.63	134.699	211.42	134.577	130.6	99.8191	116.052		89.4941	-0.557563	0.0024282	0.0226566
CHDH	24.1485	30.8792	26.4588	34.4172	21.6284	17.5195	16.334	15.5891		18.1782	-0.732164	0.0414035	0.160528
CHEK1	104.024	127.634	86.5924	129.474	110.545	154.49	107.079	143.766		170.913	0.204508	0.28331	0.523491
CHEK2	111.455	160.572	177.995	149.141	112.949	98.7463	108.894	105.659		169.186	-0.487503	0.0107712	0.0654263
CHERP	319.504	228.506	266.993	262.226	257.138	294.646	332.125	258.086		307.636	0.0857453	0.554172	0.754708
CHFR	104.024	135.868	101.024	103.251	144.19	129.007	156.081	180.14		99.4028	0.458641	0.0095432	0.0602144
CHGB	0	6.17583	2.40534	8.19456	7.20948	3.18536	3.62979	3.46424		4.60246	-0.0489956	0.950365	0.97623
CHIC1	3.71516	8.23444	2.40534	6.55565	7.20948	4.77805	5.44468	6.92847		8.71561	0.165929	0.796192	0.900529
CHIC2	5.57274	8.23444	7.21603	1.63891	14.419	14.3341	1.81489	6.92847		10.2552	0.767735	0.21145	0.448263
CHID1	79.8759	96.7547	117.862	90.1402	124.964	101.932	99.8191	79.6774		119.702	0.0785889	0.671271	0.830468
CHKA	83.591	55.5825	48.1069	44.2506	48.0632	89.1902	49.0021	65.8205		70.5675	0.137673	0.619096	0.797888
CHKB	68.7304	53.5239	33.6748	47.5285	36.0474	43.0024	45.3723	29.446		30.4178	-0.411604	0.16418	0.385997
CHM	27.8637	16.4689	21.6481	14.7502	50.4664	36.6317	39.9277	36.3745		39.9706	1.00665	0.000989479	0.0117591
CHML	131.888	218.213	127.483	158.975	233.107	269.163	168.785	218.247		112.683	0.481728	0.0327264	0.13794
CHMP1A	79.8759	59.6997	72.1603	80.3067	64.8853	71.6707	90.7447	51.9635		101.169	-0.0684613	0.777151	0.890986
CHMP1B	107.74	96.7547	113.051	91.7791	120.158	111.488	101.634	86.6059		141.589	0.035832	0.839422	0.925706
CHMP2A	66.8728	109.106	74.5657	77.0289	76.9011	70.078	81.6702	95.2665		154.772	-0.0110768	0.956046	0.978866
CHMP2B	39.0092	53.5239	33.6748	52.4452	26.4348	27.0756	29.0383	32.9102		70.3857	-0.640203	0.0195444	0.0969822
CHMP4A	9.28789	12.3517	16.8374	8.19456	9.61264	3.18536	10.8894	15.5891		8.28126	-0.227227	0.6817	0.837981
CHMP4B	76.1607	84.403	67.3496	83.5845	153.802	101.932	87.1149	129.909		155.982	0.580612	0.0064773	0.0466209
CHMP4C	7.43031	2.05861	7.21603	8.19456	9.61264	7.96341	1.81489	1.73212		8.94902	-0.312529	0.629278	0.803166
CHMP5	24.1485	43.2308	36.0802	59.0009	31.2411	30.261	19.9638	41.5708		92.4581	-0.419937	0.117367	0.313922
CHMP6	24.1485	16.4689	36.0802	18.028	19.2253	23.8902	10.8894	10.3927		20.1992	-0.530469	0.20033	0.433114
[truncated: 10,533 more rows]

## Sheet: RP to Total mRNA comparison
	Normalized Reads - RP RiboSeq									Normalized Reads- Total RNA-Seq									DESeq2 analysis- RP/Total, shDAP5 vs shNT
	NT_RP_1	NT_RP_2	NT_RP_3	NT_RP_4	DAP5_RP_1	DAP5_RP_2	DAP5_RP_3	DAP5_RP_4		NT_total_1	NT_total_2	NT_total_3	NT_total_4	DAP5_total_1	DAP5_total_2	DAP5_total_3	DAP5_total_4		baseMean	log2FoldChange	lfcSE	stat	pvalue	padj
A1BG	26.5198	15.3954	13.1112	7.84492	2.27709	21.1198	4.93018	10.7348		26.0061	37.055	28.8641	11.4724	14.419	20.7049	32.6681	8.66059		17.6115	-0.328299	0.733936	0.447313	0.654649	NA
A2M	0	0.8553	0	0.560352	0	0	0	0		0	2.05861	2.40534	1.63891	0	0	0	1.73212		0.578165	-0.278573	2.62706	0.10604	0.915551	NA
A2ML1	24.4798	32.5014	38.7091	28.5779	29.6021	33.7917	38.144	31.3787		16.7182	20.5861	38.4855	29.5004	48.0632	44.5951	36.2979	32.9102		32.7713	-0.492672	0.377039	1.30669	0.191319	NA
A4GALT	9.43491	5.9871	9.98945	13.4484	33.3973	32.3837	25.1698	28.9014		18.5758	24.7033	36.0802	11.4724	60.079	46.1878	76.2255	67.5526		31.2243	0.117527	0.421112	-0.279088	0.780178	NA
AAAS	186.148	174.909	275.334	244.874	179.131	190.782	199.023	255.158		124.458	102.931	144.321	98.3348	98.5296	101.932	166.97	105.659		165.531	-0.115468	0.283519	0.407267	0.683812	0.978336
AACS	180.793	179.613	254.731	235.908	272.491	254.142	297.886	297.272		191.331	139.985	211.67	154.058	223.494	168.824	234.121	159.355		215.98	0.234039	0.2365	-0.989594	0.322373	0.919896
AADACL3	0	0.42765	0	0	5.3132	0.703994	4.67069	4.95453		0	0	0	0	2.40316	6.37073	5.44468	8.66059		2.43433	0.859679	1.73801	-0.494635	0.620858	NA
AADAT	15.8099	12.8295	6.86775	8.96563	37.1924	38.0157	33.2138	34.6817		22.2909	22.6447	31.2695	22.9448	26.4348	27.0756	30.8532	36.3745		25.4665	1.29569	0.416355	-3.11199	0.00185834	NA
AAGAB	96.1341	100.925	69.9262	78.4492	86.5293	76.0314	73.6932	66.0603		31.5788	51.4653	24.0534	49.1674	43.2569	39.8171	34.483	38.1066		59.9799	-0.167251	0.322548	0.51853	0.604088	0.966149
AAK1	40.0346	42.765	38.7091	34.7418	63.7584	50.6876	58.1242	58.6286		31.5788	30.8792	19.2428	14.7502	45.66	49.3732	47.1872	60.6241		42.9216	-0.531164	0.334201	1.58935	0.11198	0.742292
AAMDC	32.6397	26.0867	26.2223	20.733	23.5299	23.2318	19.2017	20.6439		7.43031	2.05861	4.81069	4.91674	14.419	17.5195	5.44468	10.3927		16.2051	-1.613	0.635531	2.53804	0.0111475	NA
AAMP	331.497	285.67	235.376	230.305	327.901	336.509	210.441	233.688		185.758	152.337	187.617	149.141	213.881	197.493	166.97	180.14		226.545	-0.144226	0.255314	0.564898	0.572143	0.962396
AANAT	0	0	0.624341	0	0	1.40799	0	0.825754		0	0	0	0	2.40316	0	1.81489	0		0.442259	0.540841	3.05171	-0.177226	0.859331	NA
AAR2	84.9142	77.4047	105.514	93.5787	110.059	110.527	121.698	118.909		113.312	107.048	120.267	101.613	112.949	121.044	110.708	91.8022		106.334	0.380803	0.22027	-1.72881	0.0838439	0.676982
AARD	2.80497	3.84885	0.624341	2.24141	0	3.51997	2.33535	2.47726		11.1455	2.05861	2.40534	3.27783	2.40316	0	1.81489	0		2.55984	2.14872	1.45293	-1.47889	0.139168	NA
AARS	910.597	962.213	1406.02	1231.09	733.981	627.963	992.003	937.231		639.007	765.803	714.387	714.566	540.711	533.549	549.913	552.546		800.724	-0.0713867	0.22192	0.321678	0.747697	0.987645
AARS2	28.3047	31.6461	46.2012	51.5524	36.4334	37.3117	68.244	56.1513		79.8759	69.9927	98.6191	93.418	105.739	105.117	105.264	90.0701		68.9963	0.130221	0.33879	-0.384372	0.700703	0.979419
AASDH	35.1897	45.7586	60.5611	61.0783	42.5056	31.6797	48.0044	32.2044		50.1546	49.4066	57.7283	68.8343	36.0474	43.0024	59.8915	51.9635		48.3757	-0.108017	0.352791	0.306178	0.759469	0.990015
AASDHPPT	120.104	150.961	104.265	112.631	156.36	137.279	131.298	129.643		83.591	59.6997	40.8908	78.6678	69.6916	63.7073	68.9659	60.6241		98.0237	0.210254	0.270682	-0.776758	0.437302	0.942761
AASS	93.8391	122.308	161.08	210.692	155.601	161.919	394.674	308.006		365.943	389.077	394.476	426.117	523.889	488.954	493.651	490.189		323.776	0.465485	0.358318	-1.29909	0.193915	0.844679
AATK	3.56997	2.5659	6.24341	3.36211	0	2.81598	3.89224	2.47726		14.8606	12.3517	36.0802	14.7502	12.0158	19.1122	10.8894	6.92847		9.49471	0.0618009	0.744327	-0.0830292	0.933828	NA
ABAT	21.4198	28.2249	20.6032	18.4916	47.0598	33.7917	24.6509	37.1589		18.5758	18.5275	12.0267	8.19456	26.4348	15.9268	7.25957	13.8569		22.0127	0.540365	0.512973	-1.0534	0.292158	NA
ABCA1	27.0297	23.9484	36.2118	49.8713	15.1806	14.7839	28.2836	23.9469		44.5819	26.7619	38.4855	49.1674	31.2411	20.7049	21.7787	62.3562		32.1459	-0.462565	0.487752	0.948361	0.342946	NA
ABCA10	0.509995	0.42765	0	0	0.759029	0	0.259483	0		0	0	0	0	0	1.59268	1.81489	0		0.335233	-1.35254	2.91032	0.46474	0.642118	NA
ABCA13	0	0.42765	0	0	1.51806	0	0	0		0	0	0	0	2.40316	0	3.62979	3.46424		0.715181	-1.4242	2.67129	0.533152	0.593929	NA
ABCA2	19.8898	15.8231	32.4657	21.8537	12.1445	14.7839	15.05	24.7726		81.7335	69.9927	132.294	73.7511	28.8379	57.3366	59.8915	29.446		43.1292	0.564317	0.421991	-1.33727	0.181134	0.831588
ABCA3	17.3398	14.5401	33.0901	25.7762	7.59029	4.92796	6.48707	7.43179		39.0092	32.9378	96.2138	65.5565	19.2253	23.8902	14.5191	17.3212		26.616	-0.140504	0.526928	0.266648	0.78974	NA
ABCA4	0.254998	0.42765	0	0	0	0.703994	0.778449	0		0	0	0	0	0	0	1.81489	0		0.248749	0.320739	3.34951	-0.0957568	0.923714	NA
ABCA5	0.764993	1.7106	1.87302	1.1207	0.759029	0	1.29741	3.30302		3.71516	8.23444	4.81069	3.27783	2.40316	3.18536	1.81489	6.92847		2.82492	0.421334	1.16992	-0.360139	0.718743	NA
ABCA7	23.9698	17.5337	46.2012	36.9832	25.048	27.4558	21.2776	32.2044		35.294	53.5239	141.915	72.1122	31.2411	43.0024	65.3362	55.4278		45.5329	0.376581	0.492306	-0.764933	0.444312	0.943743
ABCA9	0.254998	0	0	1.1207	0	0.703994	0.259483	0		3.71516	0	0	1.63891	0	0	0	0		0.480828	1.72215	2.71074	-0.635306	0.525229	NA
ABCB1	0.764993	3.84885	0.624341	0.560352	1.51806	1.40799	0.778449	0		3.71516	0	2.40534	4.91674	0	0	1.81489	0		1.3972	1.65665	1.75851	-0.942078	0.346153	NA
ABCB10	19.1248	14.5401	13.1112	15.1295	27.325	18.3039	22.3155	15.6893		39.0092	37.055	50.5122	32.7783	62.4822	52.5585	70.7808	45.0351		33.4844	-0.129024	0.363883	0.354576	0.722907	NA
ABCB4	2.54998	0.8553	1.24868	4.48281	0.759029	0	0	1.65151		1.85758	0	2.40534	4.91674	0	0	3.62979	3.46424		1.73881	-1.91284	1.68365	1.13612	0.255905	NA
ABCB6	65.0244	54.3116	71.1748	80.6906	57.6862	56.3195	73.6932	91.6587		78.0183	67.9341	72.1603	63.9176	57.6758	82.8195	119.783	76.2132		73.0676	-0.220742	0.308034	0.716617	0.47361	0.948187
ABCB7	95.3691	112.472	164.826	148.493	146.493	107.711	174.892	164.325		102.167	123.517	86.5924	119.641	124.964	95.5609	98.0042	131.641		124.792	0.154226	0.294762	-0.523222	0.60082	0.964984
ABCB8	23.9698	22.6655	33.0901	24.6555	34.1563	21.8238	38.4035	39.6362		27.8637	39.1136	52.9176	39.3339	16.8221	39.8171	50.817	39.8387		34.0578	0.447858	0.390458	-1.147	0.25138	NA
ABCB9	5.60995	4.70415	3.1217	5.60352	6.07223	4.22397	2.59483	4.95453		7.43031	6.17583	24.0534	11.4724	14.419	11.1488	18.1489	8.66059		8.64963	-0.352261	0.689613	0.51081	0.609484	NA
ABCC1	251.938	254.452	433.293	375.436	280.841	278.782	337.068	337.733		356.655	275.854	428.151	327.783	334.039	286.683	379.313	332.567		329.412	-0.0279335	0.25392	0.110009	0.912402	0.997922
ABCC10	30.3447	22.6655	33.7144	20.733	33.3973	32.3837	31.138	36.3332		57.5849	86.4616	93.8084	63.9176	74.498	84.4122	90.7447	51.9635		52.7563	0.278749	0.316995	-0.879348	0.379213	0.933167
ABCC2	1.01999	0	0.624341	1.1207	0	0	0.518966	0		1.85758	0	0	0	4.80632	1.59268	3.62979	1.73212		1.05641	-3.75695	2.00992	1.8692	0.0615943	NA
ABCC3	1.01999	0.42765	0	0	0	0	0	0		0	0	0	0	0	0	1.81489	0		0.203908	-2.46894	4.3706	0.564897	0.572144	NA
ABCC4	41.3096	41.4821	48.0742	49.311	20.4938	18.3039	22.8345	17.3408		35.294	39.1136	48.1069	52.4452	7.20948	14.3341	10.8894	13.8569		30.025	0.730536	0.417921	-1.74803	0.0804596	NA
ABCC5	89.7592	82.5365	84.9103	86.8545	95.6377	80.9594	83.294	87.53		118.885	74.11	113.051	99.9737	96.1264	93.9683	117.968	112.588		94.8845	-0.0489968	0.22374	0.21899	0.826658	0.9931
ABCC6	1.01999	1.7106	1.24868	0.560352	1.51806	0.703994	0.518966	0		0	8.23444	2.40534	0	2.40316	0	0	0		1.27022	1.39724	1.84333	-0.757998	0.448452	NA
ABCC8	1.27499	1.28295	1.87302	1.1207	0.759029	2.81598	2.07586	0		5.57274	10.2931	7.21603	3.27783	2.40316	3.18536	0	3.46424		2.91343	1.68579	1.18149	-1.42683	0.15363	NA
ABCD1	11.7299	11.1189	18.1059	12.8881	8.34932	14.7839	13.4931	18.9923		22.2909	26.7619	45.7015	31.1393	28.8379	15.9268	47.1872	22.5175		21.864	0.194194	0.476306	-0.407709	0.683488	NA
ABCD3	81.5992	100.498	81.1643	79.5699	94.8786	94.3352	114.951	92.4845		46.4395	51.4653	33.6748	39.3339	36.0474	36.6317	43.5574	51.9635		67.4121	0.243025	0.296233	-0.820386	0.411996	0.940711
ABCD4	48.4495	41.4821	49.3229	43.1471	41.7466	56.3195	55.0104	44.5907		81.7335	65.8755	88.9977	81.9456	79.3043	54.1512	85.3	62.3562		61.2333	0.327144	0.274187	-1.19314	0.232814	0.869233
ABCE1	342.207	485.383	334.022	355.823	522.212	404.797	545.433	350.946		250.773	228.506	158.753	204.864	240.316	283.497	234.121	258.086		324.984	0.00106525	0.246418	-0.00432295	0.996551	0.999746
ABCF2	1.27499	0.42765	1.24868	2.24141	0.759029	2.81598	1.03793	0.825754		0	0	2.40534	0	0	3.18536	0	0		1.01388	-0.532283	1.93758	0.274715	0.783535	NA
ABCF3	81.3442	78.26	63.0584	67.8026	99.4328	125.311	106.648	115.606		66.8728	39.1136	62.5389	49.1674	91.3201	63.7073	87.1149	67.5526		79.0531	0.109989	0.269809	-0.407654	0.683528	0.978336
ABCG1	9.94491	6.8424	14.3598	11.7674	2.27709	2.81598	3.89224	3.30302		9.28789	16.4689	14.4321	6.55565	2.40316	3.18536	1.81489	6.92847		7.26745	-0.082717	0.814725	0.101527	0.919132	NA
ABCG2	3.05997	0.42765	13.1112	13.4484	4.55417	7.74394	13.2336	14.0378		3.71516	2.05861	4.81069	4.91674	4.80632	3.18536	7.25957	8.66059		6.81436	-0.165173	1.07023	0.154334	0.877347	NA
ABCG4	1.27499	2.5659	1.87302	1.68106	0.759029	0.703994	1.03793	0		1.85758	4.11722	2.40534	1.63891	0	1.59268	0	0		1.34423	0.766725	1.66832	-0.459578	0.645819	NA
ABHD1	0	0	1.24868	0.560352	0	0	0	0		0	2.05861	2.40534	3.27783	0	0	5.44468	0		0.937218	-1.38288	2.44402	0.565822	0.571515	NA
ABHD10	79.5593	85.1024	55.5663	61.6387	104.746	96.4472	79.1423	66.8861		55.7274	45.2894	28.8641	36.0561	45.66	44.5951	43.5574	46.7672		60.9753	0.175702	0.332811	-0.527932	0.597546	0.964984
ABHD11	39.0146	44.048	35.5874	30.259	28.0841	38.0157	24.1319	27.2499		24.1485	30.8792	24.0534	22.9448	12.0158	11.1488	27.2234	13.8569		27.0413	0.287198	0.434046	-0.661675	0.508179	NA
ABHD12	98.6841	89.8066	64.9314	92.458	103.228	158.399	97.8251	101.568		92.8789	69.9927	76.971	90.1402	100.933	103.524	125.228	72.7489		96.2073	0.124088	0.296092	-0.419086	0.675153	0.978336
ABHD12B	11.7299	9.83596	7.49209	8.96563	78.18	45.7596	55.5294	47.068		5.57274	8.23444	7.21603	6.55565	45.66	46.1878	29.0383	43.3029		28.5205	-0.0511676	0.530692	0.0964168	0.92319	NA
ABHD13	18.8698	18.389	18.7302	13.4484	31.1202	19.0078	21.0181	17.3408		37.1516	28.8205	16.8374	27.8615	24.0316	31.8536	32.6681	36.3745		24.5952	0.163351	0.407088	-0.401268	0.688223	NA
ABHD14A	3.56997	2.13825	1.87302	1.68106	5.3132	4.22397	1.29741	0.825754		3.71516	2.05861	4.81069	13.1113	4.80632	0	3.62979	1.73212		3.42416	1.57839	1.16139	-1.35906	0.174129	NA
ABHD14A-ACY1	8.15992	4.70415	5.61907	12.3277	3.79515	8.44793	3.89224	4.12877		1.85758	4.11722	4.81069	3.27783	0	0	0	0		4.07114	2.70135	1.33898	-2.01748	0.0436458	NA
ABHD14B	9.94491	8.12535	14.9842	9.52598	14.4216	23.9358	10.6388	18.9923		13.0031	8.23444	12.0267	13.1113	7.20948	6.37073	12.7043	8.66059		11.9931	1.07134	0.622956	-1.71977	0.0854742	NA
ABHD15	2.80497	1.28295	1.24868	2.24141	3.03612	3.51997	2.59483	6.60603		3.71516	4.11722	24.0534	6.55565	12.0158	15.9268	23.5936	12.1248		7.83984	0.0798436	0.807327	-0.0988988	0.921219	NA
ABHD16B	0.509995	0	0.624341	0	0.759029	0	0	0		24.1485	22.6447	36.0802	18.028	21.6284	20.7049	34.483	24.2496		12.7413	-0.850792	1.372	0.620112	0.535184	NA
ABHD17A	15.8099	11.1189	14.9842	8.40528	6.83126	4.92796	5.70863	4.12877		222.909	205.861	262.182	168.808	225.897	175.195	255.9	162.819		109.468	-1.16172	0.368759	3.15035	0.00163075	0.104776
ABHD17B	111.689	149.25	128.614	131.683	116.131	93.6313	131.817	109.825		68.7304	94.6961	101.024	90.1402	86.5138	87.5975	78.0404	88.338		104.233	-0.141542	0.248017	0.570696	0.568206	0.961412
ABHD17C	41.8196	28.2249	26.8467	28.5779	18.2167	25.3438	15.569	23.1211		109.597	90.5789	91.4031	83.5845	45.66	33.4463	36.2979	41.5708		46.2411	0.588094	0.343014	-1.71449	0.0864383	0.678084
ABHD18	27.7947	36.3503	33.0901	33.6211	38.7105	27.4558	40.9983	33.8559		22.2909	16.4689	24.0534	39.3339	21.6284	33.4463	18.1489	41.5708		30.5511	-0.0320404	0.402515	0.0796005	0.936555	NA
ABHD2	66.8094	82.1088	60.5611	58.8369	56.1682	45.0556	41.7768	45.4165		50.1546	43.2308	28.8641	24.5837	19.2253	19.1122	30.8532	22.5175		43.4547	0.144152	0.367764	-0.39197	0.69508	0.978781
ABHD3	22.1848	25.2314	21.8519	23.5348	22.0118	10.5599	16.0879	21.4696		11.1455	10.2931	12.0267	13.1113	7.20948	3.18536	7.25957	12.1248		14.9555	0.239175	0.58559	-0.408435	0.682955	NA
ABHD4	62.2194	57.7328	63.6828	58.2766	72.8668	56.3195	54.7509	74.3179		44.5819	30.8792	26.4588	29.5004	31.2411	35.039	45.3723	29.446		48.2928	-0.022309	0.329799	0.0676442	0.946069	0.999344
ABHD5	28.3047	25.659	15.6085	20.733	22.0118	16.1919	14.7905	15.6893		31.5788	24.7033	24.0534	24.5837	16.8221	31.8536	29.0383	13.8569		22.2174	-0.269714	0.445584	0.605305	0.544977	NA
ABHD6	6.88494	5.55945	13.7355	16.2502	3.79515	4.92796	5.44914	8.25754		9.28789	2.05861	12.0267	6.55565	2.40316	4.77805	9.07447	5.19635		7.26505	-0.469777	0.81657	0.575306	0.565085	NA
ABHD8	22.9498	23.0931	16.2329	21.8537	8.34932	18.3039	8.30346	15.6893		50.1546	45.2894	62.5389	50.8063	14.419	38.2244	38.1128	29.446		28.9854	-0.0613925	0.420544	0.145984	0.883934	NA
ABI1	96.8991	97.9319	84.9103	92.458	88.8064	83.0713	87.1863	84.2269		46.4395	69.9927	52.9176	68.8343	40.8537	50.9658	45.3723	46.7672		71.1021	0.247836	0.262553	-0.943949	0.345196	0.927226
ABI2	113.219	120.17	146.096	132.243	101.71	82.3673	86.9268	90.833		107.74	96.7547	108.24	127.835	64.8853	100.339	78.0404	119.516		104.807	-0.231163	0.243145	0.950722	0.341746	0.925795
ABI3	2.29498	1.28295	3.74604	0.560352	3.03612	2.11198	2.07586	0.825754		1.85758	6.17583	0	9.83348	4.80632	3.18536	3.62979	0		2.8389	0.807763	1.19108	-0.678177	0.49766	NA
ABI3BP	0.254998	0.42765	0	0.560352	0	0	0	0		0	0	0	0	2.40316	0	0	1.73212		0.336142	-2.93862	3.11678	0.94284	0.345763	NA
ABITRAM	11.2199	12.8295	6.86775	12.3277	12.1445	9.85592	11.1578	9.90905		7.43031	4.11722	0	4.91674	9.61264	4.77805	5.44468	5.19635		7.98801	-0.484951	0.768786	0.630801	0.52817	NA
ABL1	172.633	154.809	139.228	134.484	218.6	288.638	200.58	199.007		417.955	384.96	399.287	393.339	562.339	447.544	600.73	510.975		326.569	0.174059	0.197914	-0.87947	0.379147	0.933167
ABL2	40.0346	37.2056	51.8203	29.6986	55.4091	52.7996	39.9604	42.9392		89.1638	100.872	81.7817	63.9176	105.739	95.5609	114.338	71.0168		67.0161	0.0516365	0.299954	-0.172148	0.863321	0.995372
ABLIM1	75.2243	63.7199	68.6775	67.2422	84.2522	92.2233	104.572	75.9694		68.7304	57.6411	40.8908	57.3619	76.9011	116.266	63.5213	93.5343		75.4205	-0.251328	0.280145	0.897135	0.369647	0.930638
ABLIM2	2.29498	0.8553	2.49736	2.80176	4.55417	2.81598	2.33535	3.30302		0	4.11722	4.81069	6.55565	0	4.77805	1.81489	0		2.7209	1.69956	1.22325	-1.38937	0.164719	NA
ABLIM3	0.509995	0.42765	0	0.560352	0	0	0	0.825754		1.85758	0	0	1.63891	0	0	0	0		0.363765	0.417525	2.84531	-0.146741	0.883336	NA
ABO	0.509995	0.42765	0	0	0	0	0	0		0	0	2.40534	0	0	0	1.81489	0		0.322368	-1.22906	3.41744	0.359642	0.719115	NA
ABR	61.7094	47.4692	71.7992	70.6043	18.2167	24.6398	23.094	32.2044		39.0092	100.872	110.646	68.8343	43.2569	38.2244	54.4468	48.4993		53.3453	-0.590746	0.372563	1.58563	0.112824	0.742626
ABRACL	239.953	252.741	166.075	191.64	278.564	122.495	249.363	181.666		63.1577	55.5825	86.5924	109.807	50.4664	98.7463	58.0766	86.6059		143.221	0.0589922	0.373359	-0.158004	0.874454	0.997376
ABRAXAS1	33.9147	38.0609	52.4446	40.3453	28.0841	23.9358	27.2457	28.9014		18.5758	30.8792	21.6481	31.1393	19.2253	30.261	5.44468	20.7854		28.1807	-0.16988	0.42939	0.395631	0.692377	NA
ABRAXAS2	41.8196	36.3503	46.8256	49.311	37.9515	44.3516	49.5612	51.1968		24.1485	37.055	16.8374	26.2226	38.4506	38.2244	29.0383	29.446		37.2994	-0.266768	0.357255	0.746718	0.455234	0.944079
ABT1	111.944	87.6683	79.2913	76.2078	102.469	95.0392	77.0664	78.4467		113.312	102.931	84.187	91.7791	110.545	103.524	94.3745	77.9453		92.9207	0.00131657	0.262463	-0.00501622	0.995998	0.999609
ABTB1	2.03998	2.13825	1.87302	1.68106	3.79515	2.81598	2.59483	4.95453		3.71516	2.05861	14.4321	16.3891	14.419	4.77805	3.62979	8.66059		5.62345	1.07887	0.870078	-1.23997	0.214987	NA
ABTB2	15.8099	12.8295	16.8572	16.8106	12.9035	12.6719	20.2397	28.0756		48.297	26.7619	38.4855	37.695	52.8695	38.2244	45.3723	38.1066		28.8756	0.0725394	0.395169	-0.183565	0.854354	NA
AC004556.3	7.64993	5.1318	3.1217	7.28457	12.1445	9.85592	5.44914	7.43179		11.1455	6.17583	12.0267	8.19456	19.2253	4.77805	12.7043	8.66059		8.81126	0.27401	0.691514	-0.396246	0.691924	NA
AC004593.3	5.09995	1.7106	0.624341	0.560352	4.55417	2.11198	1.5569	1.65151		0	0	0	1.63891	4.80632	1.59268	3.62979	3.46424		2.06261	-2.33383	1.5621	1.49404	0.135166	NA
AC004706.3	9.94491	13.2572	9.36511	6.16387	9.10835	15.4879	5.44914	9.90905		26.0061	14.4103	19.2428	22.9448	26.4348	23.8902	23.5936	19.0533		15.8913	-0.19925	0.530597	0.37552	0.707274	NA
AC004922.1	28.8147	12.8295	18.7302	14.5691	3.79515	26.7518	6.22759	9.90905		1.85758	2.05861	4.81069	0	2.40316	0	3.62979	0		8.52419	-0.201692	1.30804	0.154195	0.877456	NA
AC005041.1	0	0	0	0	0	0	0.259483	1.65151		0	2.05861	0	0	2.40316	3.18536	0	0		0.597383	1.23249	2.78336	-0.442807	0.657905	NA
AC005520.1	2.03998	0.8553	1.87302	0.560352	0	2.81598	1.5569	3.30302		0	0	0	0	0	1.59268	0	6.92847		1.34536	-2.14883	1.79538	1.19686	0.23136	NA
AC005837.2	0.764993	0.8553	0.624341	0	0	0	0.259483	0		0	0	0	0	0	1.59268	0	3.46424		0.472565	-3.62366	2.62192	1.38206	0.166953	NA
AC006538.2	3.56997	3.4212	3.74604	1.68106	1.51806	2.11198	1.81638	1.65151		5.57274	2.05861	2.40534	0	4.80632	0	1.81489	1.73212		2.36914	-0.429704	1.28547	0.334278	0.73817	NA
AC007325.2	3.82496	5.1318	5.61907	8.96563	3.79515	14.0799	6.48707	2.47726		1.85758	2.05861	12.0267	21.3059	19.2253	12.7415	21.7787	10.3927		9.48549	-0.505279	0.801285	0.630586	0.528311	NA
AC007906.2	3.82496	0.8553	2.49736	2.24141	0.759029	0	0.518966	0		1.85758	2.05861	0	1.63891	0	0	0	0		1.01576	-0.646995	1.97593	0.327438	0.743337	NA
AC008763.3	15.2999	9.40831	9.98945	10.6467	3.79515	17.5999	4.15173	2.47726		3.71516	0	0	0	2.40316	3.18536	7.25957	3.46424		5.83724	-2.79647	1.32246	2.1146	0.0344642	NA
AC008878.1	9.17991	11.9742	4.99473	8.40528	1.51806	14.0799	4.93018	5.78028		7.43031	2.05861	4.81069	6.55565	12.0158	3.18536	5.44468	8.66059		6.93901	-0.836944	0.868097	0.964114	0.334989	NA
AC008878.3	9.68991	6.41475	4.99473	7.28457	9.10835	10.5599	9.34139	9.0833		3.71516	2.05861	2.40534	3.27783	4.80632	3.18536	5.44468	3.46424		5.92715	-0.127154	0.909069	0.139873	0.88876	NA
AC009133.6	3.31497	5.9871	7.49209	3.36211	3.03612	9.85592	1.5569	4.12877		1.85758	6.17583	2.40534	3.27783	7.20948	6.37073	3.62979	1.73212		4.46204	-0.607393	1.04241	0.582682	0.560108	NA
AC010615.4	3.82496	2.13825	3.1217	2.80176	3.79515	1.40799	1.81638	0		1.85758	0	4.81069	3.27783	0	0	1.81489	0		1.9167	1.35988	1.54622	-0.879487	0.379137	NA
AC011005.1	12.2399	19.6719	20.6032	21.8537	22.7709	34.4957	19.2017	13.2121		44.5819	45.2894	57.7283	34.4172	64.8853	52.5585	56.2617	39.8387		34.9756	0.0575517	0.405333	-0.141986	0.887091	NA
AC011043.1	6.11994	4.70415	4.37039	5.60352	6.07223	7.74394	2.59483	1.65151		20.4334	14.4103	21.6481	18.028	21.6284	22.2976	12.7043	19.0533		11.8165	-0.347311	0.600511	0.578359	0.563022	NA
AC011448.1	210.118	155.237	158.583	139.528	186.721	187.263	152.576	113.954		59.4425	51.4653	69.755	81.9456	79.3043	39.8171	63.5213	46.7672		112.25	0.174769	0.320269	-0.545693	0.585277	0.964434
AC015688.4	0	0.8553	0.624341	0	0	1.40799	0.259483	0.825754		1.85758	4.11722	4.81069	1.63891	12.0158	4.77805	10.8894	8.66059		3.29632	-0.84205	1.46155	0.576136	0.564523	NA
AC015813.2	2.29498	2.13825	1.87302	3.36211	2.27709	3.51997	3.89224	1.65151		1.85758	0	2.40534	3.27783	9.61264	4.77805	1.81489	5.19635		3.12199	-1.08772	1.13064	0.962038	0.33603	NA
AC015871.1	1.52999	0	0.624341	0	3.79515	2.11198	1.03793	0.825754		3.71516	10.2931	2.40534	6.55565	4.80632	6.37073	1.81489	5.19635		3.19267	1.82214	1.21146	-1.50409	0.132559	NA
AC017083.3	14.5349	20.0996	13.7355	10.6467	17.4577	16.8959	10.3793	14.0378		18.5758	30.8792	26.4588	29.5004	24.0316	17.5195	34.483	17.3212		19.7848	0.120144	0.469147	-0.256091	0.79788	NA
AC019257.8	7.13993	8.553	6.86775	6.72422	3.03612	5.63195	8.30346	9.0833		5.57274	2.05861	2.40534	4.91674	2.40316	6.37073	1.81489	5.19635		5.37989	-0.220297	0.896265	0.245794	0.805842	NA
AC020909.1	1.78498	2.99355	1.24868	0.560352	1.51806	7.03994	0.518966	5.78028		0	2.05861	2.40534	1.63891	0	4.77805	1.81489	3.46424		2.3503	0.198171	1.48775	-0.133202	0.894034	NA
AC021097.2	0.509995	0	0.624341	1.68106	2.27709	0.703994	0.518966	0		0	0	2.40534	0	0	0	0	0		0.545049	1.13317	2.4584	-0.460938	0.644843	NA
AC022506.1	0.509995	2.99355	2.49736	2.24141	1.51806	2.81598	1.03793	0		1.85758	2.05861	0	0	0	0	0	0		1.09565	0.94807	1.94196	-0.488204	0.625406	NA
AC023055.1	0	0.42765	1.24868	0.560352	0.759029	2.11198	2.07586	2.47726		0	0	0	0	0	4.77805	1.81489	0		1.01586	-0.337504	1.95781	0.172389	0.863132	NA
AC024940.7	17.3398	15.8231	25.598	21.8537	4.55417	2.81598	1.81638	1.65151		13.0031	10.2931	9.62138	29.5004	2.40316	6.37073	1.81489	3.46424		10.4952	-0.829738	0.798783	1.03875	0.29892	NA
AC025283.2	0.764993	0	1.24868	1.1207	1.51806	2.11198	2.07586	0		0	0	2.40534	0	0	0	0	0		0.702852	1.76422	2.22936	-0.791355	0.428737	NA
AC026786.1	7.39493	5.1318	8.11643	6.72422	8.34932	7.03994	8.04397	6.60603		1.85758	10.2931	2.40534	1.63891	0	4.77805	1.81489	1.73212		5.12041	0.93833	0.991818	-0.94607	0.344113	NA
AC027644.4	2.54998	2.5659	4.37039	1.68106	0.759029	3.51997	2.07586	0		0	0	0	0	2.40316	1.59268	1.81489	1.73212		1.56656	-3.07186	1.63402	1.87994	0.0601167	NA
AC040162.1	1.27499	0.42765	0	0	0.759029	0.703994	0.259483	0		5.57274	0	7.21603	3.27783	0	1.59268	3.62979	1.73212		1.6529	0.708581	1.72067	-0.411805	0.680482	NA
AC055839.2	9.17991	10.2636	6.24341	6.72422	4.55417	6.33595	3.89224	4.95453		7.43031	14.4103	2.40534	14.7502	2.40316	3.18536	7.25957	5.19635		6.82429	0.352104	0.773968	-0.454933	0.649157	NA
AC067968.1	1.27499	0.8553	1.24868	1.1207	0	1.40799	1.81638	0		0	0	0	0	2.40316	0	0	1.73212		0.741208	-1.66405	2.11545	0.786618	0.431506	NA
AC068234.1	0.254998	0	0	1.68106	0	0	0.259483	0.825754		0	0	0	0	2.40316	0	0	0		0.339028	-1.44665	3.19029	0.453455	0.650221	NA
AC068896.1	5.86495	3.84885	2.49736	4.48281	2.27709	0	5.44914	2.47726		5.57274	2.05861	0	6.55565	9.61264	6.37073	14.5191	1.73212		4.58244	-1.65056	1.04394	1.58109	0.113856	NA
AC069288.1	0.509995	2.5659	0	1.1207	2.27709	0.703994	1.5569	4.12877		0	2.05861	0	1.63891	0	1.59268	5.44468	3.46424		1.6914	-0.505325	1.63443	0.309176	0.757188	NA
AC073283.3	35.6997	14.5401	17.4815	16.8106	53.8911	40.1277	59.1621	35.5074		20.4334	30.8792	16.8374	26.2226	36.0474	36.6317	21.7787	25.9818		30.502	0.800411	0.475542	-1.68316	0.0923449	NA
AC073610.2	3.82496	7.27005	16.2329	8.96563	2.27709	10.5599	9.0819	5.78028		3.71516	2.05861	0	1.63891	2.40316	3.18536	1.81489	0		4.92555	-0.244923	1.26006	0.194374	0.845883	NA
AC073896.1	23.7148	14.1125	31.8414	18.4916	18.2167	29.5678	25.6888	17.3408		0	4.11722	4.81069	4.91674	2.40316	11.1488	1.81489	12.1248		13.7694	-1.02054	0.794009	1.2853	0.198688	NA
AC079447.1	38.5046	35.0673	17.4815	17.9313	25.807	33.7917	35.5492	25.5984		1.85758	8.23444	4.81069	3.27783	9.61264	7.96341	5.44468	8.66059		17.4746	-0.695149	0.72359	0.960694	0.336706	NA
AC090958.3	0.509995	0.42765	0.624341	0	0	0	0	0		0	2.05861	0	0	0	0	1.81489	0		0.339718	-1.80499	3.07427	0.587127	0.557118	NA
AC091167.6	1.78498	1.7106	1.24868	0	0	1.40799	0.518966	2.47726		1.85758	0	0	0	0	0	0	0		0.687879	0.588275	2.27667	-0.258393	0.796104	NA
AC091304.7	0	0	0.624341	0	0	0	0.259483	0		70.588	86.4616	64.9443	93.418	79.3043	84.4122	74.4106	79.6774		39.6313	0.376188	1.43697	-0.261794	0.79348	0.992559
AC091551.1	26.0098	47.0415	17.4815	25.2158	9.10835	15.4879	24.1319	11.5606		0	4.11722	2.40534	9.83348	4.80632	4.77805	5.44468	3.46424		13.1804	-0.990692	0.851009	1.16414	0.244368	NA
AC092143.1	0	0	0	0	0	0	0	0.825754		0	2.05861	0	0	0	1.59268	1.81489	1.73212		0.501504	0.0302036	2.83224	-0.0106642	0.991491	NA
AC092647.5	9.43491	6.8424	4.37039	15.1295	14.4216	15.4879	9.34139	18.9923		0	2.05861	2.40534	1.63891	2.40316	0	1.81489	6.92847		6.95436	-0.244703	1.17477	0.208298	0.834997	NA
AC092835.1	25.2448	36.7779	31.8414	39.785	32.6383	21.8238	37.3655	33.8559		27.8637	16.4689	21.6481	37.695	28.8379	17.5195	23.5936	19.0533		28.2508	0.221883	0.427554	-0.518958	0.60379	NA
AC093323.1	19.6348	15.3954	9.98945	14.0088	12.9035	18.3039	6.48707	6.60603		20.4334	16.4689	14.4321	9.83348	16.8221	12.7415	9.07447	5.19635		13.0207	0.0245406	0.626558	-0.0391673	0.968757	NA
AC093512.2	0.764993	1.7106	3.1217	1.68106	0.759029	4.22397	2.59483	3.30302		0	0	2.40534	1.63891	0	0	0	3.46424		1.60423	0.727882	1.75066	-0.415776	0.677574	NA
AC093668.1	4.33496	2.5659	1.87302	4.48281	2.27709	4.22397	1.5569	0.825754		5.57274	2.05861	2.40534	4.91674	4.80632	9.55609	7.25957	1.73212		3.778	-1.27643	1.00457	1.27063	0.203859	NA
AC098484.3	0.254998	0.42765	0	0	0	1.40799	0.259483	0		0	0	2.40534	0	0	0	3.62979	1.73212		0.632335	-0.225005	2.48379	0.0905896	0.927819	NA
AC099489.1	0.764993	0	0	1.1207	0	0	0.259483	0		3.71516	4.11722	4.81069	1.63891	0	4.77805	10.8894	1.73212		2.11417	-1.8935	1.68818	1.12162	0.262023	NA
AC100868.1	6.88494	2.13825	4.37039	5.60352	15.9396	60.5435	24.1319	28.9014		5.57274	6.17583	0	4.91674	31.2411	15.9268	21.7787	31.1781		16.5815	0.221777	0.767277	-0.289044	0.772548	NA
AC104472.3	0	0	0	0	0	0.703994	0	0		0	2.05861	0	4.91674	0	0	0	0		0.479959	3.60565	6.07624	-0.593401	0.552913	NA
AC113189.9	3.56997	1.7106	1.87302	3.92246	2.27709	0	1.03793	1.65151		1.85758	2.05861	0	1.63891	0	0	0	1.73212		1.45811	0.13176	1.70621	-0.0772236	0.938446	NA
AC117378.1	87.9742	54.7392	53.6933	64.4404	98.6738	80.9594	77.5854	109		117.027	98.8133	132.294	140.946	112.949	71.6707	139.747	88.338		95.5532	0.721947	0.304913	-2.36771	0.0178985	0.374412
AC118549.1	48.1946	59.4434	49.3229	44.2678	57.6862	54.9116	46.7069	40.462		96.5941	104.989	93.8084	132.752	122.561	108.302	90.7447	98.7307		78.0924	0.0276337	0.255725	-0.10806	0.913948	0.998196
AC136352.3	14.5349	15.3954	5.61907	9.52598	12.1445	16.8959	20.7586	10.7348		13.0031	10.2931	9.62138	6.55565	14.419	17.5195	16.334	10.3927		12.7342	-0.159552	0.609622	0.261722	0.793536	NA
AC138811.2	33.1497	40.1991	56.815	78.4492	40.9876	46.4636	62.2759	56.1513		50.1546	51.4653	50.5122	40.9728	62.4822	63.7073	43.5574	58.892		52.2647	-0.235692	0.379999	0.620243	0.535097	0.953509
AC139677.2	0.509995	0.42765	0.624341	0	0.759029	0	0.778449	0		0	0	0	0	0	0	1.81489	1.73212		0.415405	-1.25717	2.58662	0.486028	0.626948	NA
AC213203.2	1.27499	1.28295	1.87302	1.1207	0	2.11198	0.259483	0.825754		0	2.05861	2.40534	1.63891	2.40316	0	0	0		1.07843	0.473003	1.86161	-0.254083	0.799431	NA
AC244517.10	0	0.42765	1.24868	0.560352	0.759029	2.81598	0.259483	0		0	0	0	1.63891	0	0	0	0		0.48188	1.65132	2.63952	-0.625615	0.531568	NA
AC253536.7	42.8396	20.9549	27.471	24.0951	49.3369	48.5756	21.5371	50.371		46.4395	51.4653	57.7283	62.2787	72.0948	46.1878	90.7447	57.1599		48.08	0.228459	0.425375	-0.537076	0.591215	0.964498
ACAA1	43.3496	40.1991	35.5874	24.6555	95.6377	87.2953	68.763	57.8028		50.1546	37.055	40.8908	37.695	69.6916	65.3	54.4468	53.6956		53.8887	0.536825	0.336829	-1.59376	0.11099	0.742292
ACAA2	365.412	430.216	283.451	330.608	469.08	403.389	426.331	330.302		219.194	203.802	168.374	183.558	218.688	245.273	208.713	242.496		295.555	-0.0322947	0.217128	0.148736	0.881762	0.997376
ACACB	8.92492	13.2572	12.4868	12.3277	9.10835	4.92796	4.67069	9.0833		46.4395	55.5825	55.3229	68.8343	45.66	23.8902	32.6681	24.2496		26.7146	0.0443853	0.443397	-0.100103	0.920263	NA
ACAD10	38.2496	34.212	56.1907	57.1559	22.7709	26.0478	41.2578	30.5529		42.7243	61.7583	91.4031	73.7511	33.6442	36.6317	41.7425	51.9635		46.2535	0.125475	0.384019	-0.326743	0.743862	0.987645
ACAD11	39.2696	35.9226	40.5822	39.785	25.807	20.4158	25.6888	21.4696		39.0092	45.2894	26.4588	49.1674	26.4348	22.2976	18.1489	41.5708		32.3323	-0.134351	0.364321	0.368772	0.712298	NA
ACAD8	90.2692	93.2278	76.7939	79.5699	119.927	123.903	100.16	94.9617		66.8728	63.8169	64.9443	62.2787	98.5296	86.0049	98.0042	74.4811		87.1091	-0.106594	0.24774	0.430266	0.667002	0.978336
ACAD9	54.3145	47.0415	47.4499	58.8369	64.5175	49.2796	62.7949	69.3634		55.7274	49.4066	60.1336	52.4452	45.66	52.5585	74.4106	38.1066		55.1279	0.278222	0.297594	-0.934907	0.349836	0.927226
ACADM	128.009	154.809	126.741	147.373	189.757	119.679	154.652	120.56		83.591	86.4616	52.9176	62.2787	60.079	84.4122	47.1872	74.4811		105.812	0.165824	0.293982	-0.56406	0.572713	0.962907
ACADS	25.2448	23.0931	21.2276	34.7418	17.4577	28.1598	19.2017	16.5151		35.294	24.7033	36.0802	19.667	16.8221	15.9268	32.6681	17.3212		24.0078	0.105118	0.444721	-0.236368	0.813147	NA
ACADSB	54.8245	50.8904	58.688	68.3629	26.566	18.3039	22.0561	16.5151		40.8667	37.055	43.2962	59.0009	26.4348	12.7415	19.9638	8.66059		35.2641	0.02272	0.399614	-0.0568549	0.954661	0.999344
ACADVL	145.859	117.604	157.334	145.131	185.203	145.023	166.069	173.408		115.17	102.931	170.779	127.835	134.577	144.934	156.081	142.034		145.623	0.0681552	0.219512	-0.310485	0.756192	0.988893
ACAN	4.58996	2.5659	6.24341	3.36211	8.34932	14.7839	9.0819	14.8636		3.71516	2.05861	2.40534	1.63891	4.80632	7.96341	3.62979	5.19635		5.95337	0.309109	0.947801	-0.326133	0.744324	NA
ACAP1	26.2648	26.0867	22.4763	23.5348	34.1563	29.5678	38.663	44.5907		24.1485	20.5861	28.8641	19.667	48.0632	23.8902	50.817	34.6424		31.0012	-0.175909	0.382624	0.459743	0.6457	NA
ACAP2	97.4091	111.617	119.873	127.2	125.999	86.5913	121.179	77.6209		57.5849	51.4653	43.2962	63.9176	69.6916	58.9293	61.7064	77.9453		84.5016	-0.420866	0.295712	1.42323	0.154669	0.793301
ACAP3	12.2399	11.5466	11.8625	14.0088	20.4938	19.0078	12.9741	16.5151		48.297	49.4066	48.1069	39.3339	60.079	65.3	79.8553	55.4278		35.2784	-0.0801706	0.353133	0.227027	0.820403	0.9931
ACAT1	146.879	151.816	135.482	150.735	113.854	101.375	109.761	106.522		27.8637	39.1136	40.8908	50.8063	50.4664	49.3732	23.5936	34.6424		83.3234	-0.412224	0.28692	1.43672	0.150797	0.785738
ACAT2	778.508	854.445	522.573	650.568	766.619	573.755	682.181	553.255		507.119	384.96	322.316	435.951	312.411	350.39	372.053	381.066		528.011	0.0985095	0.23537	-0.418531	0.675559	0.978336
ACBD3	109.394	110.761	120.498	136.726	100.951	113.343	124.552	85.8784		63.1577	63.8169	40.8908	77.0289	79.3043	58.9293	56.2617	55.4278		87.3075	-0.134243	0.277556	0.483661	0.628626	0.971011
ACBD4	7.64993	6.8424	9.98945	5.60352	3.03612	6.33595	5.18966	4.12877		5.57274	10.2931	12.0267	11.4724	4.80632	3.18536	1.81489	1.73212		6.22996	1.16914	0.855292	-1.36695	0.171642	NA
ACBD5	39.0146	40.1991	40.5822	58.8369	39.4695	39.4237	55.0104	37.9847		20.4334	32.9378	16.8374	24.5837	38.4506	23.8902	27.2234	20.7854		34.7289	-0.196275	0.402702	0.487395	0.625978	NA
ACBD6	119.594	114.183	86.159	83.4924	103.987	101.375	89.7811	77.6209		61.3001	45.2894	45.7015	54.0841	57.6758	81.2268	67.1511	50.2314		77.4283	-0.438274	0.295273	1.4843	0.137729	0.766931
ACBD7	20.1448	26.0867	11.8625	15.1295	11.3854	9.15193	11.4173	6.60603		3.71516	2.05861	2.40534	6.55565	7.20948	1.59268	0	0		8.45756	0.134844	1.01299	-0.133115	0.894103	NA
ACCS	3.31497	2.99355	1.87302	5.04317	0.759029	2.11198	1.81638	2.47726		5.57274	12.3517	0	11.4724	2.40316	4.77805	3.62979	8.66059		4.32861	-0.280526	0.951687	0.294767	0.768172	NA
ACD	97.9191	69.707	83.0373	74.5268	71.3487	78.1434	51.3776	79.2724		96.5941	43.2308	69.755	63.9176	76.9011	58.9293	79.8553	46.7672		71.3302	-0.162497	0.32522	0.499653	0.617319	0.968281
ACE	4.07996	5.55945	4.99473	6.72422	5.3132	5.63195	7.00604	11.5606		9.28789	8.23444	21.6481	3.27783	12.0158	7.96341	18.1489	6.92847		8.64844	0.32492	0.69484	-0.467619	0.640057	NA
ACE2	0.764993	0.8553	2.49736	5.04317	0	1.40799	0.778449	0.825754		0	0	2.40534	1.63891	0	0	0	1.73212		1.12184	-0.741713	1.97845	0.374897	0.707737	NA
ACER2	11.4749	7.27005	8.74077	11.207	6.83126	8.44793	4.41121	2.47726		3.71516	6.17583	16.8374	0	0	1.59268	10.8894	3.46424		6.47094	-0.245819	0.924392	0.265925	0.790297	NA
ACER3	17.8498	21.8102	13.1112	13.4484	8.34932	18.3039	14.0121	8.25754		5.57274	2.05861	7.21603	3.27783	0	4.77805	1.81489	15.5891		9.7156	-0.841008	0.814125	1.03302	0.301594	NA
ACHE	7.13993	7.27005	12.4868	11.7674	15.9396	18.3039	17.9043	26.4241		9.28789	8.23444	21.6481	14.7502	21.6284	25.4829	34.483	32.9102		17.8538	-0.0652869	0.503028	0.129788	0.896734	NA
ACIN1	409.781	429.361	479.494	472.937	457.695	429.437	617.569	543.346		659.44	621.7	466.637	481.84	581.565	619.553	549.913	620.098		527.523	0.110104	0.193992	-0.56757	0.570327	0.961553
ACKR2	0	0.8553	0	0	0.759029	0.703994	0.259483	0		0	0	0	0	2.40316	0	0	0		0.31131	0.213587	3.24979	-0.0657234	0.947598	NA
ACKR3	8.92492	5.55945	20.6032	12.8881	5.3132	2.11198	10.8983	11.5606		1.85758	2.05861	31.2695	11.4724	14.419	1.59268	27.2234	6.92847		10.9176	-0.784028	1.22298	0.64108	0.521471	NA
ACKR4	0.254998	0	0	0	0	0	0	0		1.85758	2.05861	0	1.63891	0	6.37073	0	1.73212		0.869559	-0.900188	2.41504	0.372743	0.70934	NA
ACLY	1623.31	1861.99	2177.08	1885.02	1565.12	1482.61	1883.33	1902.54		1396.9	1292.81	1349.4	1086.6	999.715	1119.66	1154.27	1034.07		1488.4	0.106544	0.169669	-0.627951	0.530036	0.952274
ACMSD	0.254998	0.8553	0.624341	0	0	0	0	0.825754		0	0	0	0	0	0	0	1.73212		0.268282	-1.84388	3.31224	0.556686	0.577742	NA
ACO1	259.588	291.657	313.419	289.702	201.143	171.775	228.345	197.355		154.179	129.692	151.537	167.169	96.1264	135.378	137.932	107.391		189.524	-0.190917	0.208373	0.916225	0.359549	0.927226
ACO2	293.757	294.223	396.456	367.591	505.513	313.277	571.122	611.884		308.358	288.205	233.318	276.976	317.217	380.651	435.574	348.156		371.393	0.149177	0.25886	-0.576286	0.564422	0.960784
ACOT1	0.764993	1.7106	1.24868	0.560352	1.51806	1.40799	0.518966	0		7.43031	4.11722	7.21603	0	0	1.59268	5.44468	5.19635		2.42043	0.127138	1.33445	-0.0952739	0.924097	NA
ACOT11	9.17991	6.41475	6.86775	8.40528	15.1806	11.9679	13.4931	15.6893		13.0031	16.4689	7.21603	13.1113	7.20948	9.55609	10.8894	5.19635		10.6156	1.44692	0.597354	-2.42221	0.0154266	NA
ACOT13	120.359	156.092	119.249	134.484	124.481	105.599	122.216	102.394		29.7213	26.7619	36.0802	45.8896	24.0316	39.8171	34.483	29.446		78.1941	-0.110459	0.316166	0.349371	0.726811	0.98619
ACOT2	9.43491	9.83596	6.24341	5.04317	12.1445	10.5599	11.4173	17.3408		11.1455	12.3517	9.62138	13.1113	26.4348	20.7049	41.7425	29.446		15.4111	-0.665798	0.530614	1.25477	0.209562	NA
ACOT4	2.54998	2.5659	6.24341	1.1207	3.79515	4.92796	3.63276	6.60603		3.71516	6.17583	0	16.3891	9.61264	0	7.25957	5.19635		4.98691	1.02534	0.98454	-1.04145	0.297669	NA
ACOT6	0.764993	0.42765	0.624341	0	3.03612	1.40799	1.81638	1.65151		0	0	0	1.63891	0	1.59268	1.81489	3.46424		1.13998	0.398067	1.77721	-0.223984	0.82277	NA
ACOT7	313.137	303.632	337.144	284.659	330.937	290.75	260.002	289.014		248.916	257.326	199.644	198.308	163.415	200.678	188.749	135.105		250.088	0.3044	0.195746	-1.55507	0.119928	0.751142
ACOT8	45.8996	36.7779	46.8256	47.0695	46.3008	63.3595	36.8466	33.0302		74.3031	104.989	76.971	68.8343	67.2885	63.7073	63.5213	50.2314		57.8722	0.422661	0.314264	-1.34492	0.17865	0.829703
ACOT9	122.144	137.703	125.492	126.079	199.625	173.183	161.139	136.249		65.0153	53.5239	52.9176	68.8343	62.4822	74.8561	81.6702	79.6774		107.537	0.0799359	0.250215	-0.319469	0.749371	0.987645
ACOX1	77.5193	83.3918	119.873	112.07	144.216	108.415	142.456	153.59		35.294	28.8205	57.7283	36.0561	43.2569	58.9293	65.3362	46.7672		82.1075	0.0173882	0.325884	-0.0533569	0.957448	0.999344
ACOX2	4.33496	7.27005	5.61907	3.36211	6.07223	4.92796	2.07586	0.825754		1.85758	8.23444	9.62138	0	0	3.18536	0	1.73212		3.69493	1.14847	1.26888	-0.905102	0.365411	NA
ACOX3	31.1097	33.7844	49.3229	45.9488	24.2889	29.5678	32.1759	27.2499		16.7182	34.9964	50.5122	32.7783	26.4348	31.8536	27.2234	24.2496		32.3884	-0.199003	0.398056	0.499939	0.617118	NA
ACOXL	8.15992	4.70415	6.24341	8.40528	9.10835	4.92796	5.96811	4.95453		5.57274	22.6447	19.2428	22.9448	24.0316	11.1488	18.1489	22.5175		12.4202	-0.246607	0.582608	0.42328	0.672091	NA
ACP1	195.583	190.304	134.858	125.519	205.697	231.614	153.873	142.855		89.1638	94.6961	57.7283	80.3067	100.933	81.2268	63.5213	65.8205		125.856	0.243505	0.312847	-0.778349	0.436363	0.942761
ACP2	48.4495	48.3245	49.9473	42.0264	37.9515	47.1676	39.1819	41.2877		37.1516	45.2894	38.4855	39.3339	38.4506	63.7073	41.7425	38.1066		43.5377	-0.404516	0.312342	1.2951	0.195284	0.846965
ACP5	6.37494	5.55945	3.74604	5.60352	18.9757	12.6719	10.8983	12.3863		3.71516	2.05861	7.21603	3.27783	16.8221	14.3341	19.9638	15.5891		9.94956	-0.786109	0.715863	1.09813	0.272149	NA
ACP6	14.2799	18.389	14.9842	18.4916	15.1806	14.0799	10.8983	8.25754		37.1516	37.055	45.7015	22.9448	26.4348	20.7049	16.334	15.5891		21.0298	0.396594	0.442379	-0.896503	0.369984	NA
ACPP	2.80497	4.70415	5.61907	3.92246	2.27709	2.81598	1.81638	1.65151		1.85758	0	0	0	0	0	0	0		1.71682	-0.186319	1.70711	0.109143	0.913089	NA
ACRBP	4.84495	2.5659	4.99473	3.36211	0	0	1.03793	1.65151		3.71516	2.05861	2.40534	3.27783	2.40316	1.59268	1.81489	1.73212		2.34106	-1.77488	1.34191	1.32265	0.185951	NA
ACRV1	0.254998	0	0	0.560352	0	0	0	0		0	0	0	3.27783	0	0	0	1.73212		0.364081	-0.238741	3.36874	0.0708695	0.943502	NA
ACSBG1	6.62994	6.41475	3.74604	2.80176	2.27709	6.33595	3.63276	4.12877		5.57274	4.11722	2.40534	6.55565	7.20948	7.96341	3.62979	1.73212		4.69705	-0.397262	0.902463	0.440198	0.659794	NA
ACSF2	15.2999	12.8295	19.9789	25.2158	12.1445	9.15193	10.8983	11.5606		14.8606	16.4689	19.2428	19.667	9.61264	9.55609	10.8894	6.92847		14.0191	0.20705	0.556226	-0.372241	0.709713	NA
ACSF3	27.5397	23.0931	28.0953	31.94	47.8188	39.4237	49.3018	54.4998		29.7213	39.1136	57.7283	44.2506	48.0632	44.5951	92.5596	74.4811		45.7641	0.166467	0.342824	-0.485574	0.627269	0.971011
ACSL1	20.6548	27.7973	24.9736	27.4572	31.8792	19.7118	23.8724	25.5984		13.0031	28.8205	12.0267	13.1113	9.61264	22.2976	7.25957	20.7854		20.5539	0.108624	0.488243	-0.222479	0.823941	NA
ACSL3	294.522	386.596	315.916	337.892	374.201	256.958	436.969	317.09		204.334	220.271	185.211	219.614	247.526	227.754	181.489	263.282		279.352	-0.0851625	0.235894	0.361021	0.718084	0.983704
ACSL4	459.251	591.013	506.965	509.92	276.287	204.862	355.751	266.719		239.628	240.857	190.022	240.92	124.964	117.859	108.894	138.569		285.78	0.00328766	0.235723	-0.0139472	0.988872	0.999344
ACSM1	2.03998	1.28295	1.24868	1.1207	0	0	0.259483	0.825754		0	0	2.40534	1.63891	0	0	0	0		0.676363	-0.928599	2.19666	0.422732	0.672491	NA
ACSM3	6.37494	8.12535	8.11643	14.5691	1.51806	2.11198	4.15173	2.47726		7.43031	4.11722	4.81069	1.63891	2.40316	6.37073	5.44468	3.46424		5.1953	-1.74482	0.929903	1.87635	0.0606077	NA
ACSM4	0.254998	0	1.87302	1.1207	0	0	0	1.65151		0	0	4.81069	0	0	0	0	0		0.606932	0.392005	2.93834	-0.13341	0.893869	NA
ACSS1	1.52999	2.13825	1.87302	3.36211	0.759029	0.703994	1.29741	2.47726		0	0	0	1.63891	0	3.18536	0	0		1.18533	-1.37435	1.83444	0.749191	0.453742	NA
ACSS2	101.234	77.8323	101.768	104.786	50.0959	53.5036	64.0923	67.7118		52.0122	84.403	110.646	90.1402	31.2411	47.7805	72.5957	65.8205		73.4789	-0.10545	0.312312	0.337644	0.735632	0.98619
ACSS3	59.4144	74.8388	113.006	105.346	50.0959	59.8395	66.1682	66.0603		63.1577	43.2308	55.3229	70.4732	31.2411	28.6683	29.0383	46.7672		60.1668	0.259009	0.361617	-0.716252	0.473836	0.948187
ACTA1	26.0098	22.6655	15.6085	25.2158	72.1078	69.6954	40.9983	52.8483		13.0031	28.8205	19.2428	14.7502	31.2411	36.6317	36.2979	15.5891		32.5454	0.684345	0.450332	-1.51965	0.1286	NA
ACTA2	5.35495	3.4212	4.37039	1.68106	5.3132	3.51997	1.81638	3.30302		1.85758	2.05861	2.40534	1.63891	2.40316	1.59268	0	0		2.54603	0.881999	1.46399	-0.602461	0.546867	NA
ACTB	19590.2	18063.9	19327.1	17367.5	21802.4	21906.9	18840.5	22961.7		12029.7	10791.2	11954.6	9423.75	11588	10556.3	14330.4	11063		15724.8	0.0964951	0.157748	-0.611706	0.540732	0.954338
ACTC1	37.4847	34.212	30.5927	28.5779	53.8911	49.9836	52.1561	56.1513		22.2909	24.7033	24.0534	11.4724	31.2411	30.261	34.483	38.1066		34.9788	-0.0642702	0.367577	0.174848	0.861199	0.995372
ACTG1	8748.46	8029.13	10786.1	8659.68	12949.8	14118.6	13353	16474.6		9103.99	8226.21	11011.7	8043.78	11386.2	10717.2	13373.9	10545.1		10970.5	0.312195	0.180722	-1.72749	0.0840795	0.676982
ACTG2	6.62994	8.98066	4.99473	4.48281	8.34932	9.85592	8.04397	14.0378		1.85758	8.23444	4.81069	0	4.80632	4.77805	5.44468	6.92847		6.38971	-0.0460283	0.866435	0.0531238	0.957633	NA
ACTL10	0	0	0.624341	0	0	1.40799	0.518966	0		5.57274	0	0	0	2.40316	3.18536	7.25957	3.46424		1.52727	0.401192	1.95099	-0.205635	0.837076	NA
ACTL6A	239.188	283.104	226.636	272.331	270.214	200.638	252.217	188.272		126.315	117.341	76.971	126.196	91.3201	116.266	96.1893	83.1416		172.896	0.0570137	0.24673	-0.231078	0.817255	0.9931
ACTL6B	2.29498	2.5659	0.624341	1.68106	0.759029	0	0.518966	0.825754		0	0	0	1.63891	0	1.59268	0	0		0.781351	-1.75114	2.07867	0.842435	0.399545	NA
ACTL8	3.31497	1.7106	1.24868	0.560352	3.03612	5.63195	3.89224	5.78028		5.57274	4.11722	0	1.63891	0	4.77805	1.81489	1.73212		2.80182	1.6441	1.21522	-1.35292	0.17608	NA
ACTN1	612.759	623.086	811.643	686.991	768.896	589.947	876.015	952.92		704.022	514.653	495.501	445.784	550.324	559.032	600.73	609.705		650.126	0.119791	0.224263	-0.534153	0.593236	0.964498
ACTN2	0.764993	0.8553	1.24868	1.68106	2.27709	1.40799	2.07586	2.47726		7.43031	2.05861	7.21603	3.27783	0	3.18536	7.25957	1.73212		2.80925	1.55989	1.14272	-1.36507	0.172232	NA
ACTN3	37.2297	31.6461	51.1959	45.3885	8.34932	10.5599	7.78449	9.90905		42.7243	55.5825	50.5122	63.9176	14.419	4.77805	9.07447	20.7854		28.991	-0.0489029	0.464841	0.105204	0.916214	NA
ACTN4	677.784	594.434	708.002	648.887	813.679	761.018	898.33	1100.73		793.186	761.686	726.414	601.481	781.027	788.378	774.959	698.043		758.002	0.363556	0.17545	-2.07214	0.0382526	0.520822
ACTR10	98.9391	108.623	82.413	96.9408	110.059	101.375	115.729	104.045		48.297	51.4653	36.0802	47.5285	50.4664	44.5951	47.1872	57.1599		75.0565	0.0511713	0.273284	-0.187246	0.851468	0.994992
ACTR1A	304.977	279.256	267.218	258.322	284.636	286.526	286.988	277.453		163.467	160.572	139.51	157.336	129.771	154.49	156.081	107.391		213.375	0.211076	0.183068	-1.153	0.248912	0.879751
ACTR1B	66.0444	69.2793	57.4394	65.0008	78.939	100.671	70.5794	87.53		61.3001	55.5825	103.43	60.6398	91.3201	79.6341	112.523	93.5343		78.3405	-0.0753151	0.272571	0.276314	0.782307	0.992559
ACTR2	678.804	819.378	679.283	719.492	712.728	541.372	738.748	604.452		193.188	284.088	214.076	275.337	206.672	262.793	208.713	268.478		462.975	-0.128454	0.209453	0.613283	0.539689	0.954261
ACTR3	321.552	429.789	322.16	346.297	429.61	305.534	492.758	348.468		105.882	111.165	96.2138	168.808	134.577	154.49	132.487	173.212		254.563	-0.137999	0.266935	0.516977	0.605172	0.966149
ACTR3B	35.9547	39.3438	30.5927	26.3365	28.8431	27.4558	18.1638	19.8181		20.4334	30.8792	16.8374	26.2226	16.8221	15.9268	14.5191	15.5891		23.9836	0.0741333	0.447601	-0.165624	0.868453	NA
ACTR5	39.5246	31.2185	38.7091	36.9832	58.4452	43.6477	48.2638	36.3332		52.0122	51.4653	45.7015	54.0841	57.6758	60.5219	52.6319	53.6956		47.5571	0.219584	0.2988	-0.734886	0.462409	0.944079
ACTR6	72.6743	100.925	65.5558	81.8114	62.9994	61.2475	71.6173	61.9316		27.8637	26.7619	26.4588	36.0561	21.6284	41.4097	21.7787	31.1781		50.7436	-0.310386	0.354423	0.875749	0.381167	0.933167
ACTR8	76.4993	83.8194	78.6669	66.1215	103.987	97.8552	107.166	89.1815		74.3031	57.6411	36.0802	57.3619	74.498	81.2268	54.4468	91.8022		76.9161	-0.016319	0.268921	0.0606833	0.951611	0.999344
ACTRT3	9.68991	11.9742	11.8625	10.6467	16.6986	15.4879	20.2397	19.8181		13.0031	10.2931	4.81069	4.91674	28.8379	27.0756	18.1489	31.1781		15.9176	-0.921225	0.528038	1.74462	0.0810514	NA
ACVR1	40.7996	55.1669	56.1907	52.6731	34.9153	40.8317	46.7069	34.6817		27.8637	30.8792	33.6748	22.9448	26.4348	38.2244	27.2234	29.446		37.4161	-0.453503	0.363109	1.24895	0.211684	0.855295
ACVR1B	69.1044	67.5687	73.6722	76.2078	25.048	38.0157	32.4354	22.2954		37.1516	72.0514	96.2138	75.39	40.8537	20.7049	34.483	41.5708		51.4229	-0.22534	0.354449	0.635747	0.524941	0.952274
ACVR1C	2.54998	2.13825	3.1217	3.36211	3.03612	4.22397	3.89224	5.78028		1.85758	0	0	1.63891	4.80632	0	0	1.73212		2.38372	0.0740568	1.50438	-0.0492276	0.960738	NA
ACVR2A	37.4847	47.8968	39.9578	52.1127	34.1563	51.3916	40.4793	31.3787		14.8606	26.7619	9.62138	18.028	14.419	19.1122	14.5191	22.5175		29.6686	-0.188599	0.441746	0.426941	0.669422	NA
ACVR2B	122.399	106.485	150.466	121.036	89.5654	89.4073	67.2061	80.0982		202.476	201.744	257.372	219.614	204.269	165.639	199.638	121.248		149.916	-0.271015	0.240524	1.12677	0.259839	0.886853
ACY1	21.4198	18.389	14.3598	15.1295	9.10835	24.6398	9.60087	15.6893		9.28789	8.23444	7.21603	3.27783	4.80632	7.96341	7.25957	8.66059		11.5652	-0.373659	0.701273	0.53283	0.594151	NA
ACYP1	22.1848	28.6526	29.344	23.5348	13.6625	10.5599	17.1259	18.1666		11.1455	14.4103	2.40534	11.4724	4.80632	0	3.62979	0		13.1938	1.67876	0.871494	-1.9263	0.0540668	NA
AD000671.2	3.05997	2.5659	3.1217	3.36211	2.27709	5.63195	4.41121	4.95453		1.85758	0	2.40534	0	2.40316	0	0	0		2.25316	1.32434	1.62057	-0.817203	0.413812	NA
ADA	30.5997	32.9291	27.471	34.7418	8.34932	12.6719	11.9362	15.6893		37.1516	22.6447	36.0802	26.2226	12.0158	6.37073	9.07447	3.46424		20.4633	0.655402	0.516353	-1.26929	0.204338	NA
ADA2	84.6592	95.7937	99.2702	97.5012	95.6377	82.3673	83.813	80.9239		53.8698	72.0514	50.5122	67.1954	60.079	55.7439	67.1511	38.1066		74.0422	0.0252144	0.264309	-0.0953974	0.923999	0.999344
ADAD2	1.01999	0.8553	1.24868	1.1207	3.03612	2.11198	1.81638	4.12877		1.85758	0	7.21603	1.63891	7.20948	3.18536	3.62979	3.46424		2.72121	0.569434	1.18709	-0.479687	0.63145	NA
ADAL	12.4949	8.12535	10.6138	10.0863	8.34932	6.33595	8.56294	4.12877		5.57274	10.2931	4.81069	6.55565	4.80632	19.1122	3.62979	6.92847		8.15039	-0.95921	0.719477	1.3332	0.182465	NA
ADAM10	300.132	393.866	394.583	388.884	331.696	317.501	405.053	337.733		169.04	148.22	120.267	206.503	187.446	194.307	159.711	202.658		266.1	-0.271781	0.220185	1.23433	0.217079	0.858704
ADAM11	3.56997	3.4212	1.87302	1.68106	3.79515	1.40799	0.259483	1.65151		11.1455	6.17583	9.62138	4.91674	0	1.59268	5.44468	1.73212		3.64302	0.93938	1.15109	-0.816078	0.414455	NA
ADAM12	0	0.42765	0	0	0	0	0.778449	0		1.85758	2.05861	0	0	0	0	0	1.73212		0.4284	1.94034	3.03344	-0.63965	0.5224	NA
ADAM15	39.0146	20.5272	32.4657	26.8969	15.1806	20.4158	14.531	22.2954		76.1607	84.403	81.7817	65.5565	50.4664	31.8536	32.6681	50.2314		41.528	0.140764	0.36723	-0.383314	0.701487	0.979419
ADAM17	78.2843	86.813	103.641	93.5787	79.6981	73.9194	107.426	86.7042		68.7304	82.3444	74.5657	88.5013	62.4822	89.1902	74.4106	55.4278		81.6073	0.11981	0.27414	-0.437039	0.662083	0.978336
ADAM19	30.0897	40.6268	48.6986	52.1127	95.6377	95.0392	96.7872	99.9163		31.5788	20.5861	67.3496	52.4452	96.1264	111.488	139.747	157.623		77.2407	-0.378238	0.333871	1.13289	0.257263	0.885495
ADAM22	16.0649	22.2378	23.7249	26.3365	4.55417	9.85592	12.9741	11.5606		20.4334	30.8792	19.2428	21.3059	12.0158	7.96341	9.07447	15.5891		16.4883	-0.0511515	0.536311	0.0953766	0.924016	NA
ADAM23	45.3896	36.7779	37.4604	43.7074	8.34932	12.6719	6.74656	11.5606		92.8789	72.0514	26.4588	36.0561	12.0158	20.7049	18.1489	12.1248		30.819	-0.276293	0.497229	0.555666	0.578439	NA
ADAM28	0.764993	1.28295	0	1.1207	1.51806	0.703994	0	0		3.71516	0	0	0	0	3.18536	0	1.73212		0.876459	-1.15921	2.19553	0.527984	0.59751	NA
ADAM33	0.254998	0.42765	0.624341	1.1207	0	0	0.778449	0		16.7182	8.23444	24.0534	8.19456	2.40316	1.59268	0	0		4.02516	3.30595	1.6457	-2.00884	0.0445541	NA
ADAM8	3.31497	2.5659	3.74604	5.04317	6.83126	6.33595	4.93018	10.7348		3.71516	0	7.21603	3.27783	4.80632	9.55609	9.07447	6.92847		5.50479	-0.229651	0.873603	0.262878	0.792644	NA
ADAM9	33.6597	35.495	32.4657	35.3022	53.132	52.7996	69.0225	56.1513		33.4364	39.1136	38.4855	40.9728	57.6758	73.2634	52.6319	48.4993		47.0067	0.161743	0.307562	-0.525888	0.598966	0.964984
ADAMTS1	45.6446	51.7457	90.5294	72.2854	58.4452	48.5756	71.3578	81.7497		68.7304	76.1686	52.9176	68.8343	38.4506	62.1146	68.9659	57.1599		63.3547	0.243607	0.352651	-0.690788	0.489698	0.948237
ADAMTS10	4.07996	1.7106	4.37039	2.80176	0.759029	3.51997	1.29741	2.47726		20.4334	12.3517	24.0534	16.3891	4.80632	6.37073	16.334	6.92847		8.04272	0.25695	0.777154	-0.330629	0.740924	NA
ADAMTS12	17.0848	14.5401	14.3598	17.9313	12.9035	13.3759	14.531	7.43179		31.5788	41.1722	26.4588	32.7783	19.2253	20.7049	18.1489	31.1781		20.8377	0.197987	0.429696	-0.46076	0.64497	NA
ADAMTS13	0.764993	1.28295	2.49736	4.48281	0.759029	0	1.29741	1.65151		9.28789	14.4103	26.4588	13.1113	14.419	3.18536	12.7043	13.8569		7.51062	-0.527053	0.943141	0.558827	0.57628	NA
ADAMTS14	3.05997	2.5659	0	3.36211	4.55417	0.703994	1.5569	3.30302		7.43031	0	16.8374	9.83348	9.61264	6.37073	1.81489	5.19635		4.76262	0.603924	1.03001	-0.586326	0.557656	NA
ADAMTS15	8.92492	5.55945	13.1112	9.52598	14.4216	13.3759	14.2716	15.6893		11.1455	14.4103	9.62138	11.4724	16.8221	11.1488	21.7787	19.0533		13.1458	0.119356	0.543975	-0.219414	0.826328	NA
ADAMTS16	39.5246	30.3632	42.4552	45.9488	110.818	124.607	163.474	154.416		50.1546	39.1136	72.1603	59.0009	163.415	165.639	205.083	188.801		103.436	0.0984385	0.278265	-0.353757	0.723521	0.985309
ADAMTS17	3.56997	0.8553	3.1217	1.1207	2.27709	0.703994	1.03793	2.47726		3.71516	10.2931	2.40534	4.91674	0	6.37073	5.44468	0		3.01935	0.215978	1.18471	-0.182305	0.855343	NA
ADAMTS18	1.01999	0	0	1.68106	0.759029	0	0	0		0	2.05861	4.81069	0	0	0	0	1.73212		0.753843	-0.397721	2.51738	0.15799	0.874465	NA
ADAMTS19	87.7192	93.2278	89.2807	128.321	41.7466	44.3516	43.5931	54.4998		118.885	117.341	141.915	154.058	100.933	81.2268	63.5213	103.927		91.5341	-0.501391	0.269014	1.86381	0.0623481	0.624074
ADAMTS2	6.62994	5.1318	9.98945	10.0863	4.55417	6.33595	6.74656	8.25754		16.7182	14.4103	19.2428	21.3059	12.0158	17.5195	16.334	6.92847		11.3879	0.18682	0.577695	-0.323389	0.7464	NA
ADAMTS20	11.4749	14.9678	13.7355	15.1295	4.55417	8.44793	6.22759	4.95453		50.1546	41.1722	48.1069	52.4452	21.6284	15.9268	39.9277	29.446		23.6437	-0.307839	0.442396	0.695845	0.486526	NA
ADAMTS3	14.5349	17.5337	23.1006	17.3709	3.03612	5.63195	6.22759	0.825754		1.85758	8.23444	16.8374	13.1113	7.20948	9.55609	5.44468	3.46424		9.62354	-1.4432	0.742605	1.94343	0.0519646	NA
ADAMTS4	29.8347	16.6784	23.7249	14.5691	25.807	21.8238	25.9483	33.8559		22.2909	20.5861	26.4588	11.4724	28.8379	23.8902	27.2234	27.7139		23.7947	-0.132721	0.454912	0.291751	0.770477	NA
ADAMTS5	3.56997	2.5659	0	2.24141	6.07223	7.74394	4.93018	7.43179		11.1455	10.2931	9.62138	11.4724	4.80632	9.55609	21.7787	20.7854		8.37589	1.00149	0.72836	-1.37499	0.169133	NA
ADAMTS6	2.03998	2.99355	1.24868	1.68106	0	0	0.518966	0		0	4.11722	4.81069	3.27783	0	7.96341	1.81489	5.19635		2.22891	-3.42244	1.50243	2.27794	0.0227299	NA
ADAMTS7	143.054	126.157	255.355	234.227	63.7584	68.9914	76.807	85.8784		429.101	376.726	512.338	396.617	194.656	210.234	297.643	207.854		229.962	-0.443535	0.297601	1.49037	0.136127	0.766486
ADAMTS8	29.8347	29.5079	21.2276	18.4916	33.3973	27.4558	20.4992	30.5529		70.588	51.4653	52.9176	45.8896	67.2885	49.3732	47.1872	38.1066		39.6114	0.259122	0.360417	-0.71895	0.472172	0.948187
ADAMTS9	7.39493	8.12535	19.9789	19.052	1.51806	0.703994	3.37328	3.30302		20.4334	18.5275	36.0802	27.8615	0	1.59268	5.44468	10.3927		11.4864	0.0175175	0.819696	-0.0213707	0.98295	NA
ADAMTSL1	3.56997	2.5659	10.6138	7.28457	15.9396	34.4957	27.2457	28.0756		5.57274	6.17583	9.62138	9.83348	31.2411	23.8902	32.6681	29.446		17.39	0.343248	0.612266	-0.560618	0.575058	NA
ADAMTSL2	2.03998	0.8553	1.87302	2.24141	0	0.703994	0.259483	0		5.57274	2.05861	4.81069	4.91674	0	4.77805	0	0		1.88188	-1.00658	1.62355	0.619986	0.535267	NA
ADAMTSL3	1.52999	2.99355	3.74604	3.92246	0.759029	2.81598	1.29741	0.825754		1.85758	6.17583	2.40534	0	0	3.18536	1.81489	5.19635		2.40785	-1.16654	1.27404	0.915621	0.359865	NA
ADAMTSL4	4.84495	5.1318	3.1217	5.04317	3.03612	2.11198	2.33535	3.30302		9.28789	14.4103	33.6748	13.1113	7.20948	9.55609	12.7043	10.3927		8.70468	-0.0684722	0.703074	0.0973898	0.922417	NA
ADAP1	3.05997	4.70415	3.1217	2.80176	2.27709	5.63195	2.33535	2.47726		5.57274	2.05861	2.40534	9.83348	4.80632	11.1488	7.25957	5.19635		4.66815	-0.624792	0.882609	0.707892	0.479012	NA
ADAP2	0.509995	0.42765	0.624341	0.560352	0.759029	0	0.518966	0		0	0	2.40534	1.63891	0	0	1.81489	0		0.578718	0.230732	2.28307	-0.101062	0.919501	NA
ADARB1	6.88494	9.40831	13.7355	17.9313	7.59029	7.74394	7.78449	11.5606		24.1485	20.5861	33.6748	13.1113	21.6284	25.4829	32.6681	22.5175		17.2786	-0.642323	0.525018	1.22343	0.221167	NA
ADARB2	2.80497	0.8553	1.87302	1.68106	3.03612	2.11198	1.03793	4.95453		1.85758	2.05861	4.81069	3.27783	7.20948	0	0	3.46424		2.56458	0.769311	1.27807	-0.601934	0.547218	NA
ADAT1	20.9098	15.8231	14.3598	20.1727	32.6383	17.5999	20.4992	17.3408		29.7213	41.1722	40.8908	32.7783	60.079	39.8171	45.3723	29.446		29.9138	0.0177042	0.394905	-0.0448315	0.964242	NA
ADAT2	8.41492	11.5466	9.98945	7.84492	10.6264	11.2639	11.1578	8.25754		3.71516	6.17583	2.40534	11.4724	2.40316	7.96341	3.62979	5.19635		7.62893	0.466965	0.749911	-0.622694	0.533486	NA
ADAT3	15.0449	8.553	8.11643	15.1295	14.4216	24.6398	13.7526	29.7272		46.4395	41.1722	72.1603	26.2226	38.4506	46.1878	56.2617	34.6424		30.6826	0.808756	0.466733	-1.7328	0.0831306	NA
ADCK1	34.6797	28.2249	33.0901	29.6986	26.566	29.5678	27.5052	24.7726		20.4334	12.3517	21.6481	24.5837	12.0158	25.4829	27.2234	13.8569		24.4813	-0.227725	0.419233	0.543195	0.586995	NA
ADCK2	12.7499	13.2572	16.2329	8.40528	17.4577	13.3759	18.1638	14.8636		37.1516	37.055	31.2695	22.9448	40.8537	44.5951	47.1872	46.7672		26.3956	-0.135041	0.38825	0.347821	0.727975	NA
ADCK5	7.39493	6.8424	6.24341	8.40528	5.3132	7.03994	5.96811	7.43179		16.7182	10.2931	26.4588	16.3891	4.80632	19.1122	19.9638	17.3212		11.6064	-0.0736168	0.563424	0.13066	0.896045	NA
ADCY1	4.33496	3.4212	6.86775	3.36211	3.79515	2.11198	2.59483	4.12877		98.4517	61.7583	101.024	67.1954	60.079	63.7073	67.1511	48.4993		37.4052	-0.105862	0.489935	0.216074	0.82893	0.9931
ADCY10	0.509995	0	0	0	1.51806	0.703994	1.5569	0		0	2.05861	0	1.63891	2.40316	1.59268	3.62979	5.19635		1.30053	0.642698	1.89964	-0.338326	0.735118	NA
ADCY2	71.3993	69.2793	103.641	69.4836	60.7223	70.3994	65.9087	73.4921		222.909	279.971	180.401	217.975	204.269	229.346	205.083	221.711		146.624	-0.138206	0.228174	0.605704	0.544711	0.955264
ADCY3	36.4647	31.2185	36.8361	45.3885	29.6021	15.4879	20.7586	29.7272		120.743	119.399	170.779	124.557	112.949	76.4488	88.9298	103.927		72.701	-0.186702	0.296895	0.62885	0.529447	0.952274
ADCY5	20.6548	17.5337	26.8467	20.733	23.5299	34.4957	29.0621	27.2499		40.8667	51.4653	67.3496	39.3339	55.2727	71.6707	79.8553	57.1599		41.4425	-0.00583288	0.329992	0.0176758	0.985897	0.999344
ADCY6	17.3398	16.6784	28.0953	36.9832	7.59029	1.40799	5.96811	5.78028		33.4364	45.2894	60.1336	60.6398	7.20948	20.7049	25.4085	13.8569		24.1577	-0.680947	0.549977	1.23814	0.215665	NA
ADCY7	3.56997	2.99355	8.74077	6.72422	1.51806	2.81598	3.63276	5.78028		1.85758	14.4103	14.4321	9.83348	4.80632	15.9268	9.07447	5.19635		6.95706	-0.486157	0.813687	0.597474	0.550191	NA
ADCY8	1.78498	1.7106	4.99473	1.1207	5.3132	2.81598	5.18966	5.78028		3.71516	14.4103	4.81069	8.19456	21.6284	20.7049	12.7043	20.7854		8.47899	-0.178986	0.734326	0.243741	0.807431	NA
ADCY9	13.5149	17.9613	16.8572	19.6123	15.9396	11.2639	14.2716	18.1666		61.3001	51.4653	45.7015	52.4452	69.6916	46.1878	70.7808	53.6956		36.1785	-0.344242	0.349634	0.984576	0.324832	0.920273
ADCYAP1R1	15.2999	15.3954	14.3598	14.5691	3.79515	6.33595	6.48707	5.78028		13.0031	14.4103	16.8374	11.4724	7.20948	7.96341	3.62979	3.46424		10.0008	-0.0610939	0.65091	0.0938592	0.925221	NA
ADD1	305.997	345.969	333.398	309.314	455.417	425.213	421.919	434.347		226.625	259.385	223.697	198.308	341.249	320.129	339.385	289.264		326.851	-0.0847314	0.152691	0.55492	0.57895	0.964079
ADD2	321.042	300.21	392.71	321.082	339.286	335.101	328.765	350.12		386.376	438.484	425.746	304.838	624.822	573.366	595.285	547.349		411.536	-0.573757	0.168431	3.40648	0.000658055	0.0630254
ADD3	169.063	218.529	247.863	272.331	233.022	190.078	261.818	245.249		143.034	205.861	156.347	219.614	168.221	146.527	136.117	225.175		202.428	0.147917	0.268655	-0.550584	0.581919	0.964079
ADGRA2	3.82496	3.84885	3.1217	1.68106	0.759029	1.40799	1.29741	0.825754		27.8637	32.9378	40.8908	29.5004	9.61264	12.7415	19.9638	15.5891		12.8667	-0.363333	0.723275	0.502345	0.615425	NA
ADGRA3	49.9795	60.7263	69.9262	66.6819	37.1924	35.9037	43.5931	40.462		222.909	251.15	240.534	299.921	177.834	202.271	208.713	214.783		138.911	-0.279253	0.222867	1.253	0.210205	0.855295
ADGRB1	7.13993	4.70415	13.1112	11.207	1.51806	4.22397	4.67069	9.0833		29.7213	39.1136	43.2962	34.4172	14.419	12.7415	23.5936	24.2496		17.3256	0.0832663	0.558481	-0.149094	0.881479	NA
ADGRB2	8.92492	4.70415	6.86775	5.04317	6.07223	12.6719	8.56294	6.60603		81.7335	65.8755	86.5924	59.0009	100.933	70.078	68.9659	41.5708		39.6377	0.441303	0.432767	-1.01972	0.307859	0.913172
ADGRB3	2.03998	1.7106	0	5.04317	0	0.703994	0.259483	0		3.71516	8.23444	7.21603	3.27783	2.40316	0	0	0		2.16274	0.245982	1.7472	-0.140787	0.888039	NA
ADGRD1	0.254998	0.42765	1.87302	1.68106	0	0.703994	0	0		0	0	4.81069	0	0	0	0	0		0.609463	-0.889908	2.62396	0.339147	0.734499	NA
ADGRD2	0.764993	0	0	0.560352	0	0	0.259483	0.825754		1.85758	0	2.40534	3.27783	0	1.59268	3.62979	0		0.948362	0.0128488	2.07144	-0.00620285	0.995051	NA
ADGRE2	0.764993	1.28295	0	1.1207	0.759029	0.703994	0.778449	0		0	0	0	4.91674	0	1.59268	0	0		0.744971	0.826433	2.15968	-0.382664	0.701969	NA
ADGRE5	2.29498	3.4212	2.49736	3.36211	8.34932	8.44793	9.34139	8.25754		1.85758	8.23444	2.40534	4.91674	9.61264	9.55609	10.8894	3.46424		6.05677	0.687034	0.80716	-0.851175	0.394672	NA
ADGRF3	10.9649	5.55945	6.86775	5.04317	4.55417	11.2639	13.7526	5.78028		18.5758	26.7619	36.0802	26.2226	16.8221	17.5195	23.5936	13.8569		15.2012	0.920899	0.568953	-1.61859	0.105537	NA
ADGRG1	2.03998	2.99355	3.74604	3.36211	0	2.11198	0.518966	0.825754		0	8.23444	0	0	2.40316	1.59268	0	1.73212		1.84755	-1.34601	1.59246	0.845241	0.397976	NA
ADGRG2	27.0297	29.0802	41.8308	40.9057	23.5299	14.7839	23.3535	19.8181		16.7182	18.5275	24.0534	36.0561	21.6284	22.2976	18.1489	24.2496		25.1257	-0.567992	0.440257	1.29014	0.197003	NA
ADGRG3	0.509995	0	0.624341	0	0	0	0	0		0	0	2.40534	0	0	1.59268	1.81489	0		0.434203	-2.04043	2.9396	0.69412	0.487607	NA
ADGRG5	2.03998	3.4212	2.49736	2.80176	1.51806	2.81598	1.29741	0.825754		31.5788	24.7033	31.2695	27.8615	16.8221	17.5195	9.07447	8.66059		11.5442	0.402667	0.707545	-0.569105	0.569285	NA
ADGRG6	2.54998	4.2765	8.11643	9.52598	8.34932	4.92796	9.0819	6.60603		7.43031	6.17583	4.81069	0	7.20948	14.3341	12.7043	12.1248		7.38898	-1.05981	0.818134	1.2954	0.195183	NA
ADGRL1	115.259	100.498	129.239	117.114	77.421	82.3673	67.7251	79.2724		665.013	615.524	632.605	550.675	552.727	508.066	656.991	512.707		341.45	-0.460161	0.179383	2.56525	0.0103102	0.28737
ADGRL2	249.898	265.998	211.027	225.261	179.131	147.839	176.448	134.598		382.661	419.956	339.153	453.979	418.15	519.214	362.979	391.459		304.86	-0.655785	0.200705	3.26741	0.00108535	0.0815151
ADGRL3	40.7996	44.9033	43.7039	56.5955	40.9876	46.4636	59.1621	49.5453		63.1577	53.5239	48.1069	49.1674	74.498	82.8195	83.4851	74.4811		56.9625	-0.444742	0.287036	1.54943	0.121278	0.751174
ADGRL4	4.84495	4.70415	1.87302	2.80176	0.759029	0.703994	0.259483	0		3.71516	4.11722	4.81069	4.91674	0	0	0	0		2.09414	0.471975	1.62019	-0.291308	0.770816	NA
ADGRV1	142.289	210.404	213.525	257.201	151.047	140.095	217.966	183.317		408.667	428.191	404.098	544.119	579.162	617.961	491.836	614.902		350.299	-0.601648	0.251364	2.39353	0.0166871	0.362144
ADH5	841.237	1012.25	807.273	872.468	899.449	734.266	860.705	679.596		315.788	335.553	353.586	342.533	293.186	363.132	245.011	294.46		578.156	0.0140429	0.187389	-0.0749399	0.940262	0.999344
ADH6	0.254998	0	0	0	0	0	0	0		0	2.05861	0	1.63891	0	3.18536	0	0		0.446118	-0.194774	3.20173	0.0608338	0.951492	NA
ADHFE1	0.254998	0	0	0	0	0	0.518966	0		0	0	2.40534	1.63891	0	0	1.81489	1.73212		0.522827	0.878917	2.73923	-0.320863	0.748315	NA
ADI1	37.9946	41.0544	20.6032	17.3709	26.566	26.7518	24.1319	34.6817		7.43031	22.6447	7.21603	18.028	19.2253	28.6683	19.9638	22.5175		23.428	-0.800099	0.521406	1.5345	0.124906	NA
ADIPOR1	71.3993	75.6941	61.1854	65.0008	72.8668	131.647	57.0863	66.0603		128.173	139.985	161.158	134.391	175.431	165.639	232.306	157.623		118.478	-0.133255	0.309352	0.430756	0.666646	0.978336
ADIPOR2	80.5793	84.6747	58.0637	76.7682	76.6619	69.6954	63.8328	72.6664		63.1577	63.8169	79.3763	80.3067	57.6758	36.6317	72.5957	46.7672		67.7044	0.33474	0.287626	-1.1638	0.244504	0.877973
ADK	71.6543	112.472	61.1854	75.6475	98.6738	83.0713	80.4397	71.8406		46.4395	22.6447	31.2695	27.8615	33.6442	38.2244	29.0383	31.1781		57.2053	0.0112011	0.368589	-0.0303891	0.975757	0.999344
ADM	20.9098	22.6655	58.688	43.7074	23.5299	31.6797	29.5811	37.1589		31.5788	14.4103	52.9176	21.3059	14.419	11.1488	25.4085	17.3212		28.5269	0.547286	0.551842	-0.991744	0.321322	NA
ADM2	5.35495	3.4212	6.86775	6.72422	4.55417	2.81598	1.29741	0		1.85758	4.11722	12.0267	3.27783	0	0	3.62979	1.73212		3.60481	0.452382	1.25792	-0.359627	0.719126	NA
ADM5	0	0	0	0	0	0.703994	0.259483	0		7.43031	6.17583	2.40534	0	12.0158	1.59268	7.25957	5.19635		2.68996	1.05556	1.76532	-0.597942	0.549878	NA
ADNP	287.382	362.22	387.716	369.272	271.732	221.758	287.767	243.598		586.995	559.942	514.744	621.148	571.952	640.258	649.732	698.043		454.641	-0.610965	0.174143	3.50841	0.000450796	0.0514909
ADNP2	203.488	203.989	187.302	189.959	221.636	167.551	156.987	140.378		382.661	403.488	380.044	350.727	341.249	356.761	335.755	360.28		273.891	-0.0818047	0.18061	0.452937	0.650594	0.976236
ADO	66.2994	61.154	71.1748	52.1127	38.7105	67.5835	32.6949	61.1058		169.04	121.458	211.67	104.89	129.771	105.117	134.302	72.7489		93.7395	0.107116	0.3562	-0.30072	0.763628	0.991803
ADORA1	2.29498	2.13825	4.99473	0.560352	4.55417	2.81598	5.18966	5.78028		11.1455	2.05861	9.62138	4.91674	9.61264	14.3341	7.25957	17.3212		6.53738	0.0937647	0.802858	-0.116789	0.907028	NA
ADORA2A	11.7299	8.12535	8.74077	6.72422	2.27709	7.03994	2.33535	5.78028		18.5758	16.4689	21.6481	22.9448	9.61264	17.5195	19.9638	17.3212		12.3005	-0.900451	0.592222	1.52046	0.128395	NA
ADORA2B	7.90493	5.9871	9.36511	11.207	3.03612	2.81598	4.41121	2.47726		5.57274	12.3517	12.0267	11.4724	2.40316	6.37073	0	1.73212		6.19589	0.582626	0.883835	-0.659202	0.509766	NA
ADPGK	69.1044	54.7392	51.8203	48.7506	78.18	70.3994	63.8328	70.1891		91.0214	80.2858	101.024	78.6678	105.739	50.9658	85.3	84.8738		74.0559	0.42622	0.27878	-1.52887	0.126296	0.758221
ADPRH	6.37494	6.41475	7.49209	8.96563	8.34932	7.03994	5.96811	3.30302		3.71516	2.05861	4.81069	3.27783	0	4.77805	5.44468	8.66059		5.41584	-0.772852	0.887689	0.870634	0.383954	NA
ADPRHL1	0.764993	1.28295	1.24868	0	1.51806	2.81598	1.03793	1.65151		3.71516	0	0	1.63891	4.80632	4.77805	0	0		1.57866	0.329552	1.58791	-0.207539	0.835589	NA
ADPRHL2	67.0644	55.1669	61.1854	53.7938	93.3606	101.375	69.5414	68.5376		72.4456	74.11	72.1603	52.4452	72.0948	81.2268	99.8191	50.2314		71.5349	0.300027	0.298664	-1.00456	0.315107	0.916153
ADPRM	7.39493	11.5466	9.98945	10.6467	13.6625	8.44793	11.6767	8.25754		16.7182	16.4689	16.8374	18.028	28.8379	11.1488	5.44468	5.19635		12.5189	0.655861	0.582364	-1.1262	0.260079	NA
ADRA1A	0.509995	0	1.24868	0	0	0	0	0.825754		0	2.05861	2.40534	1.63891	2.40316	0	1.81489	3.46424		1.0231	-1.56001	2.07267	0.752657	0.451656	NA
ADRA2A	2.29498	0.42765	3.1217	2.80176	0	0.703994	0.518966	1.65151		11.1455	10.2931	9.62138	11.4724	4.80632	0	1.81489	8.66059		4.33342	-0.155596	1.13768	0.136765	0.891216	NA
ADRA2B	5.09995	3.4212	8.11643	7.28457	2.27709	2.11198	1.81638	1.65151		13.0031	20.5861	24.0534	13.1113	4.80632	3.18536	10.8894	3.46424		7.80489	0.0639022	0.785721	-0.0813293	0.93518	NA
ADRA2C	5.09995	1.28295	3.1217	4.48281	6.07223	2.81598	5.44914	5.78028		87.3062	82.3444	122.673	62.2787	50.4664	71.6707	94.3745	58.892		41.5069	0.819254	0.488291	-1.6778	0.093386	0.700736
ADRB2	1.78498	3.4212	2.49736	1.1207	0.759029	0	1.03793	0		1.85758	0	7.21603	0	0	4.77805	0	0		1.52955	-1.35666	1.7792	0.762511	0.445755	NA
ADRM1	406.466	374.622	348.382	319.4	558.645	633.595	470.702	539.218		436.531	384.96	389.666	321.227	557.533	520.807	471.872	419.172		447.05	0.236898	0.186536	-1.26998	0.204092	0.852829
ADSL	351.387	339.982	280.953	266.167	506.272	447.036	411.54	363.332		399.379	333.495	283.831	268.782	370.087	423.654	332.125	341.227		357.453	0.285568	0.211704	-1.3489	0.177369	0.829703
ADSS	252.193	301.066	260.974	277.374	304.371	242.174	353.675	246.075		85.4486	127.634	113.051	126.196	139.383	124.229	110.708	154.158		201.169	-0.143304	0.237811	0.602598	0.546776	0.95535
ADSSL1	8.41492	5.9871	12.4868	8.96563	4.55417	7.74394	2.59483	3.30302		7.43031	6.17583	7.21603	13.1113	0	7.96341	7.25957	5.19635		6.7752	-0.357436	0.795762	0.449174	0.653306	NA
AEBP1	83.3842	75.6941	114.254	105.346	80.4571	81.6633	86.1483	85.0527		131.888	74.11	139.51	111.446	115.352	76.4488	107.079	98.7307		97.9103	0.0380722	0.269847	-0.141088	0.887801	0.997922
AEBP2	135.659	129.15	165.45	147.933	115.372	145.727	113.135	104.871		98.4517	88.5202	98.6191	113.085	67.2885	87.5975	74.4106	93.5343		111.175	0.0295938	0.239824	-0.123398	0.901792	0.997922
AEN	170.848	156.948	157.334	153.536	199.625	292.862	200.58	217.173		200.618	183.216	204.454	158.975	221.091	178.38	226.862	147.23		191.858	0.458089	0.226743	-2.0203	0.0433525	0.550202
AFAP1	29.3247	36.3503	42.4552	43.7074	53.8911	73.2154	62.2759	80.9239		42.7243	51.4653	52.9176	36.0561	50.4664	54.1512	72.5957	84.8738		54.2121	0.301181	0.323453	-0.931142	0.35178	0.927226
AFAP1L1	11.7299	10.2636	6.24341	7.28457	5.3132	11.2639	7.00604	13.2121		13.0031	24.7033	16.8374	11.4724	16.8221	6.37073	10.8894	10.3927		11.4255	0.562092	0.611067	-0.919853	0.35765	NA
AFAP1L2	8.92492	7.27005	6.24341	5.60352	2.27709	2.81598	2.59483	4.95453		7.43031	10.2931	19.2428	6.55565	2.40316	0	1.81489	3.46424		5.74302	1.26537	0.988886	-1.27959	0.200689	NA
AFDN	365.922	409.261	398.329	390.005	373.442	313.981	411.54	361.68		572.134	627.876	507.528	562.147	636.837	654.593	575.321	678.99		489.974	-0.255431	0.150553	1.69662	0.0897687	0.689063
AFF1	230.263	233.069	227.26	212.373	263.383	275.966	261.559	259.287		200.618	234.682	187.617	208.142	295.589	273.941	268.604	308.317		246.292	-0.230671	0.152823	1.5094	0.131197	0.763493
AFF2	30.0897	41.0544	37.4604	36.9832	12.1445	14.0799	11.9362	20.6439		35.294	39.1136	26.4588	34.4172	24.0316	28.6683	18.1489	24.2496		27.1734	-0.83633	0.401012	2.08555	0.0370195	NA
AFF3	5.86495	5.55945	3.1217	3.92246	1.51806	0.703994	5.44914	4.95453		7.43031	4.11722	4.81069	3.27783	2.40316	0	1.81489	0		3.43427	1.90595	1.3339	-1.42886	0.153045	NA
AFF4	158.354	180.896	199.165	193.882	292.985	323.133	283.615	256.81		269.349	242.916	209.265	268.782	353.265	417.283	341.2	413.976		275.305	0.0470797	0.179591	-0.26215	0.793206	0.992559
AFG1L	11.4749	13.2572	13.7355	15.1295	13.6625	17.5999	15.569	17.3408		7.43031	6.17583	12.0267	18.028	7.20948	11.1488	12.7043	12.1248		12.7886	0.291454	0.556505	-0.523721	0.600472	NA
AFG3L2	280.497	299.355	232.879	271.771	412.912	322.429	383.256	311.309		258.203	294.381	202.049	290.088	377.296	383.836	370.238	334.299		314.05	-0.081383	0.19111	0.425844	0.670221	0.978336
AFMID	39.5246	28.6526	36.2118	26.8969	48.5779	44.3516	31.6569	34.6817		11.1455	22.6447	9.62138	6.55565	12.0158	14.3341	21.7787	12.1248		25.0484	-0.0524524	0.498508	0.105219	0.916202	NA
AFP	4.33496	1.7106	0.624341	0.560352	6.83126	7.74394	4.15173	4.12877		3.71516	0	0	0	2.40316	4.77805	5.44468	1.73212		3.00994	-0.416793	1.42057	0.293398	0.769218	NA
AFTPH	27.0297	30.3632	39.9578	38.6643	26.566	29.5678	43.3337	27.2499		24.1485	49.4066	48.1069	72.1122	48.0632	46.1878	81.6702	55.4278		42.991	-0.30101	0.39399	0.764003	0.444865	0.943743
AGA	26.7748	30.7908	20.6032	22.4141	25.807	17.5999	23.8724	22.2954		7.43031	4.11722	12.0267	11.4724	14.419	7.96341	3.62979	22.5175		17.1084	-0.626908	0.570377	1.09911	0.27172	NA
AGAP1	36.7197	36.7779	43.7039	44.2678	17.4577	30.2718	25.9483	41.2877		118.885	142.044	105.835	113.085	197.059	144.934	152.451	121.248		85.7485	-0.847509	0.287046	2.95252	0.00315194	0.152224
AGAP2	3.05997	2.5659	5.61907	5.60352	6.07223	11.2639	2.33535	3.30302		5.57274	10.2931	7.21603	1.63891	9.61264	3.18536	1.81489	8.66059		5.48857	0.523868	0.939848	-0.557397	0.577257	NA
AGAP3	65.2794	54.3116	66.8045	62.199	30.3612	30.2718	26.4673	32.2044		148.606	166.747	163.563	157.336	103.336	74.8561	132.487	98.7307		88.3476	-0.442358	0.248845	1.77764	0.0754627	0.656238
AGAP5	0	0	0	0	0	0	0	0.825754		11.1455	6.17583	2.40534	6.55565	7.20948	6.37073	3.62979	3.46424		2.98639	1.51608	1.69787	-0.892927	0.371896	NA
AGAP6	1.01999	0.42765	0	0	0	0	0	0.825754		13.0031	22.6447	2.40534	8.19456	12.0158	4.77805	14.5191	5.19635		5.3144	-1.06745	1.44876	0.736803	0.461242	NA
AGAP9	0.764993	0	0.624341	0.560352	0	0	0	0		11.1455	12.3517	12.0267	18.028	24.0316	14.3341	21.7787	13.8569		8.09394	-2.68622	1.33795	2.00772	0.0446732	NA
AGBL2	0.254998	0	1.87302	0.560352	0	0.703994	0	0		0	2.05861	2.40534	0	2.40316	0	1.81489	0		0.754648	-1.66038	2.39291	0.693873	0.487762	NA
AGBL3	0.764993	0.42765	0.624341	1.1207	0	1.40799	1.29741	0.825754		0	0	2.40534	0	7.20948	4.77805	0	0		1.30386	-1.88394	1.80393	1.04436	0.296321	NA
AGBL4	0.254998	0	0.624341	0	3.03612	1.40799	2.33535	3.30302		0	0	0	0	4.80632	6.37073	3.62979	6.92847		2.04357	-0.365464	1.68323	0.217121	0.828114	NA
AGBL5	37.4847	29.5079	28.7197	38.1039	23.5299	26.7518	28.8026	26.4241		191.331	205.861	252.561	149.141	148.996	121.044	143.377	129.909		98.8465	0.214711	0.263086	-0.816125	0.414429	0.940711
AGFG1	214.963	221.95	192.921	189.959	232.263	239.358	254.553	248.552		176.47	183.216	134.699	139.308	182.64	200.678	217.787	187.069		201.024	-0.0691694	0.179854	0.384587	0.700544	0.979419
AGFG2	5.35495	2.99355	4.99473	8.40528	9.10835	10.5599	9.0819	9.0833		3.71516	8.23444	12.0267	11.4724	12.0158	15.9268	16.334	1.73212		8.81497	0.429017	0.688415	-0.623196	0.533156	NA
AGGF1	5.09995	5.55945	6.24341	3.92246	0.759029	1.40799	4.67069	3.30302		13.0031	18.5275	9.62138	16.3891	9.61264	9.55609	9.07447	15.5891		8.27121	-0.428481	0.699216	0.612802	0.540007	NA
AGK	41.8196	41.9097	48.0742	40.3453	54.6501	56.3195	51.8966	45.4165		3.71516	14.4103	24.0534	22.9448	9.61264	17.5195	10.8894	20.7854		31.5226	0.373155	0.437924	-0.8521	0.394159	NA
AGL	107.864	173.198	194.17	193.882	155.601	99.9672	225.75	177.537		94.7365	98.8133	84.187	127.835	117.755	124.229	134.302	148.962		141.174	-0.376134	0.33253	1.13113	0.258001	0.886029
AGMAT	19.6348	23.5208	10.6138	11.207	14.4216	12.6719	9.60087	14.0378		24.1485	12.3517	7.21603	11.4724	9.61264	11.1488	7.25957	1.73212		12.5406	0.512109	0.65064	-0.787085	0.431232	NA
AGMO	2.54998	3.4212	1.87302	1.1207	2.27709	0.703994	2.33535	2.47726		0	0	0	4.91674	0	0	1.81489	0		1.46814	1.10073	1.71251	-0.642759	0.520381	NA
AGO1	121.889	121.025	153.588	145.691	129.035	137.279	174.113	165.151		176.47	148.22	194.833	217.975	310.008	254.829	335.755	284.067		191.871	-0.501464	0.215991	2.32169	0.0202498	0.390665
AGO2	187.168	182.607	205.408	186.597	154.083	156.991	160.36	176.711		239.628	201.744	240.534	208.142	242.719	238.902	272.234	221.711		204.721	-0.367707	0.166056	2.21435	0.0268045	0.440336
AGO3	17.8498	24.3761	31.8414	22.9744	26.566	29.5678	31.6569	23.1211		26.0061	28.8205	16.8374	37.695	26.4348	46.1878	27.2234	31.1781		28.021	-0.00976418	0.406202	0.0240377	0.980823	NA
AGO4	10.4549	11.1189	8.11643	14.5691	4.55417	9.15193	6.48707	5.78028		18.5758	43.2308	33.6748	40.9728	26.4348	20.7049	19.9638	15.5891		18.0862	-0.0152383	0.491784	0.0309859	0.975281	NA
AGPAT2	29.5797	31.2185	22.4763	21.8537	29.6021	45.7596	23.613	35.5074		59.4425	51.4653	69.755	32.7783	31.2411	47.7805	49.0021	36.3745		38.5906	0.649752	0.383323	-1.69505	0.0900657	0.689481
AGPAT3	7.13993	6.41475	11.2381	13.4484	5.3132	2.81598	4.15173	4.95453		5.57274	12.3517	24.0534	21.3059	9.61264	4.77805	9.07447	8.66059		9.43038	-0.137526	0.690413	0.199194	0.842111	NA
AGPAT4	58.9045	65.0028	82.413	100.303	36.4334	38.7197	43.5931	51.1968		33.4364	34.9964	62.5389	39.3339	24.0316	47.7805	39.9277	36.3745		49.6866	-0.690141	0.363464	1.89879	0.0575921	0.610358
AGPAT5	111.689	133.427	120.498	105.346	107.782	111.935	128.963	139.552		156.037	154.396	117.862	124.557	173.028	218.198	177.86	173.212		140.896	-0.37338	0.211848	1.76249	0.0779867	0.667135
AGPS	154.019	198.43	167.948	177.631	222.396	142.207	190.979	153.59		118.885	88.5202	60.1336	103.251	84.1106	109.895	94.3745	93.5343		134.994	-0.00519888	0.266964	0.0194741	0.984463	0.999344
AGRN	326.142	254.024	429.546	364.229	229.227	268.926	233.016	360.855		724.456	699.927	1063.16	622.787	627.225	519.214	802.183	443.422		498.021	0.0447769	0.294111	-0.152245	0.878994	0.997376
AGT	0	0	0.624341	0.560352	0	0.703994	0	0		0	2.05861	4.81069	0	0	0	1.81489	0		0.660805	1.11425	2.65378	-0.419873	0.674579	NA
AGTPBP1	117.554	146.256	114.254	155.778	120.686	106.303	139.602	110.651		156.037	183.216	163.563	158.975	129.771	172.01	166.97	173.212		144.677	-0.114251	0.220867	0.517286	0.604956	0.966149
AGTRAP	85.6792	70.5623	88.032	86.2942	78.939	85.8873	73.9526	116.431		70.588	59.6997	84.187	54.0841	57.6758	76.4488	59.8915	64.0884		75.7776	0.118844	0.284394	-0.417884	0.676032	0.978336
AHCTF1	216.238	273.269	237.249	242.072	276.287	211.198	271.938	208.09		325.076	349.964	250.156	340.894	362.877	348.797	313.977	427.833		290.995	-0.189156	0.203016	0.93173	0.351476	0.927226
AHCY	806.813	848.03	1269.91	1012	1310.84	1191.86	1383.56	1604.44		811.762	734.924	743.251	729.316	925.217	724.671	911.076	748.275		984.747	0.351564	0.204341	-1.72048	0.0853449	0.677462
AHCYL1	352.407	370.773	335.895	355.823	399.249	345.661	356.27	334.43		167.182	160.572	165.969	162.252	225.897	183.158	174.23	176.676		266.653	-0.180531	0.168221	1.07318	0.283192	0.895277
AHCYL2	43.0946	61.154	73.6722	77.8889	44.0237	59.8395	72.1363	73.4921		26.0061	22.6447	40.8908	34.4172	48.0632	39.8171	39.9277	45.0351		50.1314	-0.492692	0.376142	1.30986	0.190244	0.841747
AHDC1	73.4393	62.4369	99.2702	57.1559	37.9515	68.2875	50.0802	86.7042		217.337	152.337	247.75	167.169	127.367	122.637	177.86	145.498		118.33	0.171092	0.329346	-0.519492	0.603418	0.966149
AHI1	14.7899	15.8231	20.6032	11.7674	7.59029	9.15193	11.6767	10.7348		22.2909	28.8205	26.4588	32.7783	36.0474	20.7049	23.5936	31.1781		20.2506	-0.613965	0.440998	1.39222	0.163856	NA
AHNAK	1.52999	1.7106	1.24868	3.36211	1.51806	0	0.518966	4.12877		3.71516	4.11722	4.81069	3.27783	2.40316	0	0	0		2.02133	2.28816	1.55725	-1.46936	0.141736	NA
AHNAK2	7.64993	8.98066	14.9842	14.0088	11.3854	5.63195	12.7147	13.2121		35.294	34.9964	67.3496	60.6398	31.2411	38.2244	27.2234	27.7139		25.7031	0.654085	0.459591	-1.42319	0.154681	NA
AHR	2.29498	3.84885	1.87302	1.1207	2.27709	7.74394	3.63276	0.825754		3.71516	2.05861	0	0	4.80632	3.18536	0	1.73212		2.44467	-0.0163105	1.41062	0.0115626	0.990775	NA
AHRR	0.254998	0.42765	0	0.560352	3.79515	0.703994	1.5569	2.47726		3.71516	4.11722	0	6.55565	0	6.37073	7.25957	5.19635		2.68694	2.33095	1.37212	-1.6988	0.0893574	NA
AHSA1	283.812	327.58	295.313	359.746	399.249	406.909	505.213	464.9		135.603	148.22	113.051	144.224	204.269	203.863	154.266	225.175		273.212	-0.0408235	0.206365	0.197822	0.843184	0.994186
AHSP	1.27499	1.7106	0.624341	0.560352	0	0	0.778449	0.825754		1.85758	0	0	0	0	0	0	1.73212		0.585261	-1.17872	2.27676	0.51772	0.604654	NA
AIDA	83.6392	101.781	61.1854	81.251	74.3848	38.0157	74.7311	55.3255		89.1638	82.3444	45.7015	96.6958	93.7232	101.932	74.4106	112.588		79.1795	-0.697309	0.337466	2.06631	0.0387989	0.522109
AIF1L	150.449	171.915	106.762	123.838	116.89	115.455	82.2561	81.7497		74.3031	72.0514	50.5122	73.7511	26.4348	49.3732	32.6681	45.0351		85.8403	0.307949	0.325747	-0.945362	0.344474	0.927226
AIFM1	327.927	388.306	310.297	360.306	507.031	346.365	553.737	476.46		191.331	224.389	218.886	214.698	307.605	238.902	206.898	252.889		320.377	0.205525	0.220238	-0.933194	0.35072	0.927226
AIFM2	11.2199	17.5337	8.74077	7.84492	25.807	20.4158	24.9104	19.8181		13.0031	16.4689	9.62138	14.7502	12.0158	20.7049	14.5191	17.3212		15.9184	0.717073	0.520833	-1.37678	0.16858	NA
AIFM3	0.764993	0.42765	0	1.1207	1.51806	4.22397	1.03793	1.65151		0	0	2.40534	0	0	0	0	0		0.821885	2.58624	2.08497	-1.24042	0.21482	NA
AIG1	63.4944	65.0028	52.4446	69.4836	69.8307	86.5913	55.7888	61.9316		24.1485	37.055	31.2695	26.2226	43.2569	28.6683	34.483	43.3029		49.5609	-0.219854	0.345372	0.636571	0.524405	0.952274
AIMP1	119.849	153.526	156.085	166.985	140.42	147.839	193.574	165.151		70.588	74.11	62.5389	60.6398	91.3201	70.078	74.4106	119.516		116.664	-0.273327	0.272355	1.00357	0.315588	0.916153
AIMP2	236.128	256.162	207.905	207.89	340.045	280.894	325.911	327.824		196.903	203.802	175.59	121.28	209.075	246.866	183.304	188.801		231.774	0.228173	0.213103	-1.07072	0.284296	0.895572
AIP	66.0444	49.1798	88.6564	75.0871	60.7223	65.4715	64.3518	71.0149		52.0122	51.4653	50.5122	59.0009	36.0474	41.4097	45.3723	27.7139		56.5039	0.420807	0.322757	-1.30379	0.192306	0.842773
AIPL1	1.52999	0.42765	1.87302	1.68106	0	1.40799	0.259483	0		0	0	0	0	0	1.59268	0	0		0.548242	-2.37784	2.39789	0.991637	0.321375	NA
AJAP1	4.07996	4.2765	3.1217	5.04317	5.3132	4.92796	3.1138	3.30302		24.1485	43.2308	36.0802	39.3339	28.8379	28.6683	50.817	55.4278		21.2327	-0.278156	0.527974	0.526836	0.598307	NA
AJM1	1.01999	0	0	0	0	0.703994	0.518966	0		11.1455	4.11722	28.8641	22.9448	9.61264	9.55609	25.4085	15.5891		8.09255	0.0949452	1.34463	-0.0706108	0.943707	NA
AJUBA	35.4447	27.3696	42.4552	34.1815	21.2528	23.9358	22.3155	33.0302		91.0214	69.9927	117.862	62.2787	38.4506	44.5951	63.5213	29.446		47.3221	0.448556	0.356631	-1.25776	0.208478	0.855295
AK1	39.2696	38.0609	19.9789	28.5779	38.7105	40.8317	31.3974	42.1135		20.4334	18.5275	16.8374	8.19456	9.61264	27.0756	12.7043	12.1248		25.2782	0.230226	0.49609	-0.464081	0.64259	NA
AK2	216.493	205.7	189.8	186.037	301.335	287.23	304.633	285.711		104.024	98.8133	93.8084	81.9456	139.383	117.859	123.413	150.694		180.43	0.0702088	0.19461	-0.360767	0.718274	0.983704
AK3	70.6343	77.8323	49.9473	67.8026	70.5897	100.671	54.2319	69.3634		40.8667	45.2894	36.0802	47.5285	31.2411	47.7805	45.3723	57.1599		57.0245	0.0174698	0.348493	-0.0501295	0.960019	0.999344
AK4	313.392	367.352	207.905	259.443	454.658	504.764	443.197	404.62		163.467	185.275	173.185	163.891	182.64	207.049	210.528	180.14		276.344	0.458615	0.230505	-1.98961	0.0466337	0.566851
AK5	7.64993	8.98066	4.37039	5.04317	1.51806	2.81598	1.03793	2.47726		3.71516	6.17583	0	0	0	0	0	0		2.73652	0.99012	1.48198	-0.668108	0.504065	NA
AK6	41.5646	60.2987	19.9789	23.5348	28.0841	54.2076	52.9345	33.8559		11.1455	16.4689	4.81069	11.4724	12.0158	19.1122	9.07447	13.8569		25.776	-0.0804725	0.609231	0.132089	0.894914	NA
AK7	10.1999	17.9613	10.6138	24.0951	1.51806	4.22397	3.89224	3.30302		3.71516	8.23444	7.21603	6.55565	2.40316	0	1.81489	1.73212		6.71743	-0.0247023	1.10193	0.0224173	0.982115	NA
AK9	2.54998	4.2765	3.1217	2.24141	2.27709	2.81598	2.33535	3.30302		3.71516	12.3517	0	1.63891	2.40316	1.59268	0	1.73212		2.89717	1.46237	1.25497	-1.16526	0.243914	NA
AKAP1	223.633	230.076	168.572	180.994	227.709	205.566	220.561	206.439		297.213	296.44	218.886	209.781	249.929	273.941	292.198	287.532		236.842	-0.0202541	0.201014	0.100759	0.919741	0.999301
AKAP10	22.6948	23.9484	25.598	23.5348	32.6383	21.8238	32.1759	31.3787		35.294	41.1722	26.4588	45.8896	26.4348	63.7073	41.7425	43.3029		33.6122	0.0677757	0.359011	-0.188785	0.850262	NA
AKAP11	86.6992	131.716	138.604	153.536	72.8668	60.5435	105.61	90.0072		183.9	240.857	185.211	250.754	141.786	187.937	181.489	230.372		152.618	-0.40074	0.293992	1.3631	0.172852	0.823578
AKAP12	629.589	727.005	658.055	688.672	653.524	606.139	879.647	798.504		780.183	796.682	550.824	675.232	737.77	844.122	667.881	904.165		724.875	-0.0472133	0.20173	0.234042	0.814953	0.9931
AKAP13	157.334	184.317	220.392	211.253	161.673	160.511	205.511	199.007		254.488	238.799	190.022	224.531	237.913	230.939	272.234	280.603		214.345	-0.243156	0.20933	1.16159	0.2454	0.877973
AKAP3	0.509995	0.8553	1.24868	1.1207	0	0	0.518966	0		0	0	2.40534	0	0	0	3.62979	0		0.643049	-2.57331	2.38575	1.07862	0.280759	NA
AKAP5	3.82496	3.84885	4.99473	2.80176	6.07223	6.33595	5.18966	8.25754		11.1455	2.05861	7.21603	1.63891	12.0158	6.37073	9.07447	8.66059		6.21914	-0.00144299	0.77893	0.00185253	0.998522	NA
AKAP6	1.52999	2.99355	0.624341	1.1207	0	0.703994	0	0		1.85758	4.11722	9.62138	8.19456	2.40316	0	1.81489	0		2.18634	-0.538253	1.72404	0.312204	0.754885	NA
AKAP7	24.4798	20.5272	14.3598	16.2502	3.79515	8.44793	9.86035	7.43179		7.43031	10.2931	4.81069	9.83348	4.80632	7.96341	10.8894	6.92847		10.5067	-1.2324	0.668804	1.84269	0.0653739	NA
AKAP8	103.274	92.3725	85.5347	73.4061	100.192	83.0713	104.572	99.0905		105.882	74.11	81.7817	88.5013	144.19	122.637	121.598	114.32		99.6582	-0.38507	0.23799	1.61801	0.10566	0.731328
AKAP8L	131.324	147.112	177.937	162.502	127.517	135.871	154.392	139.552		128.173	164.689	259.777	163.891	108.142	113.08	177.86	140.302		152.008	0.250399	0.266042	-0.941201	0.346602	0.927226
AKAP9	63.7494	90.6619	106.138	132.803	48.5779	49.9836	93.4139	68.5376		156.037	195.568	158.753	190.114	144.19	167.232	112.523	207.854		124.133	-0.417746	0.342724	1.2189	0.222883	0.859873
AKIP1	59.1595	37.6332	33.7144	43.1471	45.5417	68.2875	48.5233	44.5907		22.2909	28.8205	28.8641	27.8615	24.0316	28.6683	27.2234	22.5175		36.9297	0.293927	0.400312	-0.734245	0.4628	0.944079
AKIRIN1	285.852	272.413	184.181	223.02	260.347	445.628	251.698	291.491		237.77	247.033	187.617	196.67	281.17	246.866	203.268	207.854		251.43	0.258495	0.27459	-0.941386	0.346507	0.927226
AKIRIN2	143.054	125.729	127.99	137.847	141.938	127.423	132.077	126.34		78.0183	69.9927	79.3763	68.8343	105.739	84.4122	74.4106	67.5526		105.671	-0.172524	0.226899	0.760357	0.447041	0.943743
AKNA	50.7445	46.6139	53.069	44.2678	22.7709	19.7118	22.0561	28.0756		113.312	142.044	115.457	108.168	72.0948	57.3366	96.1893	84.8738		67.2991	-0.466255	0.272834	1.70893	0.0874635	0.681893
AKR1A1	328.692	346.824	481.991	528.412	245.166	213.31	308.785	306.355		276.779	255.268	312.695	262.226	221.091	238.902	248.64	225.175		300.019	-0.403422	0.240616	1.67662	0.0936173	0.70174
AKR1B1	423.041	449.46	357.747	395.048	347.635	340.733	304.114	305.529		245.2	189.392	151.537	162.252	132.174	152.898	148.821	131.641		264.826	0.0760721	0.201703	-0.377148	0.706063	0.980666
AKR1C1	0.254998	2.13825	0.624341	1.1207	2.27709	0	0.259483	0		0	0	0	0	0	1.59268	0	0		0.516722	-1.40742	2.5472	0.552536	0.580581	NA
AKR1C3	5.09995	4.70415	4.37039	2.80176	8.34932	0.703994	4.93018	2.47726		7.43031	2.05861	0	0	2.40316	4.77805	0	1.73212		3.23995	0.0498445	1.26448	-0.0394189	0.968556	NA
AKR1E2	1.27499	1.28295	0	3.36211	0.759029	2.11198	2.07586	1.65151		1.85758	0	4.81069	3.27783	2.40316	0	0	3.46424		1.77075	1.01407	1.51396	-0.669808	0.50298	NA
AKR7A2	118.574	96.649	98.0215	102.544	83.4932	132.351	64.3518	99.9163		146.749	148.22	156.347	132.752	110.545	87.5975	108.894	83.1416		110.634	0.435366	0.282201	-1.54275	0.122892	0.751606
AKR7A3	0	0	0	0	0.759029	0	0.259483	1.65151		0	2.05861	4.81069	4.91674	2.40316	1.59268	1.81489	1.73212		1.37493	3.48428	1.89873	-1.83506	0.0664967	NA
AKT1	42.8396	52.601	43.0795	54.3541	25.048	23.9358	26.4673	35.5074		156.037	142.044	151.537	122.918	115.352	135.378	136.117	109.123		85.7712	-0.611436	0.249385	2.45178	0.0142153	0.337601
AKT1S1	56.0995	38.9162	33.7144	31.94	75.1439	114.751	70.8389	80.0982		57.5849	47.348	64.9443	29.5004	96.1264	65.3	98.0042	69.2847		64.3497	0.324014	0.358598	-0.90356	0.366229	0.928522
AKT2	74.2043	52.1733	49.9473	53.7938	50.0959	65.4715	50.0802	52.8483		187.615	189.392	235.724	177.003	180.237	167.232	203.268	188.801		123.618	-0.0183197	0.237292	0.0772031	0.938462	0.999344
AKT3	1.52999	2.5659	0.624341	1.1207	7.59029	9.85592	0.259483	7.43179		0	0	0	3.27783	0	0	0	0		2.14102	3.51482	1.91336	-1.83699	0.0662108	NA
AKTIP	16.8298	18.389	17.4815	19.052	15.1806	21.1198	17.1259	18.1666		11.1455	16.4689	12.0267	6.55565	14.419	15.9268	18.1489	17.3212		15.9599	-0.556538	0.50031	1.11239	0.265972	NA
AL022312.1	24.2248	17.9613	10.6138	15.1295	25.807	30.2718	19.7207	22.2954		14.8606	6.17583	19.2428	9.83348	26.4348	11.1488	7.25957	12.1248		17.0691	0.3312	0.566207	-0.584945	0.558585	NA
AL024498.2	31.3647	34.6397	18.7302	18.4916	22.7709	1.40799	33.4733	36.3332		9.28789	16.4689	7.21603	1.63891	2.40316	6.37073	21.7787	3.46424		16.615	-0.140819	1.18784	0.118551	0.905631	NA
AL031681.2	3.05997	2.13825	3.1217	1.1207	1.51806	0	1.5569	2.47726		9.28789	14.4103	12.0267	14.7502	4.80632	7.96341	9.07447	1.73212		5.56527	0.289212	0.892579	-0.324018	0.745924	NA
AL031777.3	371.022	398.142	245.366	201.727	339.286	284.414	156.209	166.802		0	0	0	0	2.40316	0	3.62979	1.73212		135.671	-2.71806	1.34749	2.01713	0.0436824	0.550835
AL034430.1	11.9849	13.2572	11.2381	10.0863	9.10835	2.81598	14.7905	7.43179		5.57274	12.3517	4.81069	11.4724	16.8221	20.7049	12.7043	17.3212		11.4046	-1.3155	0.645655	2.03746	0.0416035	NA
AL034430.2	71.3993	91.0895	43.7039	54.3541	103.987	89.4073	99.6415	61.9316		24.1485	30.8792	9.62138	27.8615	26.4348	43.0024	25.4085	45.0351		52.9941	-0.143546	0.425592	0.337286	0.735901	0.98619
AL109811.3	0.509995	0	0.624341	0	0	0	0.518966	0		3.71516	4.11722	2.40534	0	0	1.59268	1.81489	3.46424		1.17268	0.212288	1.98723	-0.106826	0.914927	NA
AL109827.1	33.4047	27.7973	21.2276	14.0088	9.86738	28.1598	17.3854	22.2954		9.28789	8.23444	12.0267	6.55565	2.40316	7.96341	12.7043	10.3927		15.2322	-0.306922	0.660791	0.464478	0.642306	NA
AL133500.1	0.254998	0.42765	0	0	0	0	0.259483	0		1.85758	0	0	0	2.40316	1.59268	1.81489	0		0.538153	-1.53164	2.53932	0.603168	0.546397	NA
AL135905.2	47.9396	58.5881	49.3229	52.6731	75.1439	124.607	76.5475	67.7118		9.28789	2.05861	9.62138	9.83348	12.0158	19.1122	16.334	12.1248		40.1826	-0.236728	0.527898	0.448435	0.653839	0.976902
AL136295.1	3.05997	2.99355	1.24868	6.16387	0.759029	2.11198	2.33535	4.12877		0	4.11722	0	0	2.40316	0	0	1.73212		1.94086	-0.448875	1.70887	0.262673	0.792803	NA
AL136454.1	351.132	541.405	403.324	323.323	595.079	616.699	695.414	492.975		521.98	566.118	464.231	581.814	730.561	702.373	695.104	691.115		560.79	0.171604	0.213145	-0.805104	0.42076	0.940711
AL139300.1	1.27499	1.7106	1.87302	1.68106	1.51806	1.40799	2.07586	1.65151		7.43031	2.05861	9.62138	6.55565	2.40316	4.77805	5.44468	3.46424		3.43432	0.75951	1.01195	-0.750539	0.45293	NA
AL157392.5	0	0.8553	0	0	0	0	0.259483	0		0	0	0	0	0	0	0	3.46424		0.286189	-1.83798	4.06547	0.452095	0.651201	NA
AL162231.1	8.92492	6.41475	11.8625	2.24141	9.10835	6.33595	5.44914	13.2121		3.71516	2.05861	7.21603	0	7.20948	1.59268	7.25957	5.19635		6.11231	-0.616616	0.983493	0.626966	0.530682	NA
AL358113.1	64.5144	68.424	71.1748	75.6475	59.2043	76.7354	95.4897	104.871		83.591	49.4066	60.1336	42.6117	79.3043	68.4853	65.3362	60.6241		70.3471	0.0657661	0.305772	-0.215082	0.829703	0.99312
AL359736.1	18.3598	14.5401	10.6138	10.6467	16.6986	19.7118	15.569	18.1666		46.4395	45.2894	64.9443	27.8615	43.2569	28.6683	50.817	31.1781		28.9226	0.556258	0.412124	-1.34973	0.177102	NA
AL441992.2	0.509995	0.8553	2.49736	1.68106	1.51806	0.703994	0	0.825754		1.85758	2.05861	0	0	0	0	0	0		0.781732	0.547444	2.15705	-0.253793	0.799656	NA
AL513165.2	5.86495	2.99355	2.49736	5.04317	7.59029	5.63195	4.41121	1.65151		7.43031	0	2.40534	4.91674	9.61264	0	7.25957	3.46424		4.4233	-0.11174	1.00608	0.111065	0.911565	NA
AL513523.9	6.37494	5.9871	8.74077	6.16387	7.59029	2.81598	5.18966	2.47726		22.2909	20.5861	28.8641	21.3059	26.4348	27.0756	32.6681	29.446		15.8757	-0.85288	0.51161	1.66705	0.0955042	NA
AL591806.4	0.764993	0.42765	0.624341	1.68106	0	0.703994	0	0		0	4.11722	0	0	0	0	0	0		0.519953	-0.657586	2.6199	0.250997	0.801817	NA
AL603832.3	10.1999	5.1318	4.37039	5.04317	3.03612	9.15193	4.15173	1.65151		0	6.17583	2.40534	1.63891	4.80632	0	5.44468	0		3.95048	-0.423335	1.20666	0.350832	0.725714	NA
AL713999.1	6.62994	11.5466	4.37039	8.96563	28.0841	23.9358	9.60087	14.0378		5.57274	10.2931	0	6.55565	12.0158	20.7049	7.25957	12.1248		11.3561	0.0392919	0.742687	-0.0529051	0.957808	NA
ALAD	17.0848	18.389	21.8519	15.6898	17.4577	18.3039	16.0879	20.6439		16.7182	16.4689	26.4588	16.3891	19.2253	11.1488	16.334	12.1248		17.5236	0.354711	0.472411	-0.750854	0.452741	NA
ALAS1	132.599	132.999	131.112	118.234	211.769	195.006	202.397	203.961		102.167	80.2858	76.971	106.529	136.98	114.673	154.266	128.177		139.258	0.134591	0.202148	-0.665805	0.505536	0.949426
ALCAM	53.5495	71.8452	69.3018	73.9664	24.2889	23.9358	25.6888	18.1666		35.294	49.4066	26.4588	47.5285	12.0158	15.9268	9.07447	19.0533		35.9688	-0.0135221	0.409165	0.0330481	0.973636	0.999344
ALDH16A1	149.684	116.749	156.71	144.571	152.565	163.327	151.538	222.128		172.755	144.103	216.481	158.975	153.802	138.563	150.636	124.712		157.331	0.557029	0.236072	-2.35957	0.0182961	0.378329
ALDH18A1	212.413	250.603	265.345	275.693	336.25	218.942	430.742	402.142		310.216	212.037	286.236	303.199	271.557	256.422	232.306	258.086		282.637	0.60302	0.257181	-2.34473	0.0190407	0.382728
ALDH1A2	0.254998	0.42765	1.24868	1.1207	0	0	0.259483	0		0	2.05861	0	0	0	0	0	1.73212		0.44389	-2.00663	2.59019	0.774705	0.438514	NA
ALDH1A3	15.5549	13.2572	26.2223	26.3365	19.7348	14.7839	19.7207	15.6893		11.1455	20.5861	19.2428	18.028	12.0158	4.77805	12.7043	1.73212		15.7208	1.02559	0.595254	-1.72295	0.0848972	NA
ALDH1B1	246.328	221.523	215.398	214.615	299.057	252.734	255.591	261.764		219.194	177.04	151.537	199.947	225.897	203.863	183.304	183.604		219.462	0.171712	0.181936	-0.943805	0.34527	0.927226
ALDH1L1	2.54998	0.8553	0	2.24141	3.03612	0.703994	0.259483	0.825754		0	4.11722	9.62138	0	2.40316	0	0	0		1.66336	2.10119	1.85562	-1.13234	0.257493	NA
ALDH1L2	7.90493	7.27005	11.8625	14.5691	10.6264	9.85592	7.52501	4.12877		13.0031	4.11722	7.21603	21.3059	14.419	9.55609	1.81489	13.8569		9.93949	-0.0591215	0.692291	0.0853998	0.931944	NA
ALDH2	82.8742	62.4369	86.159	89.0959	31.1202	35.1997	28.8026	27.2499		53.8698	39.1136	62.5389	45.8896	21.6284	17.5195	12.7043	15.5891		44.487	0.196326	0.372891	-0.526496	0.598544	0.964984
ALDH3A1	1.27499	0	0.624341	0.560352	1.51806	2.11198	0.778449	0.825754		0	0	2.40534	0	2.40316	0	0	0		0.781402	1.04394	2.09825	-0.497531	0.618814	NA
ALDH3A2	160.904	192.443	194.794	217.977	167.745	129.535	144.532	136.249		128.173	96.7547	127.483	178.641	88.9169	125.822	78.0404	126.445		143.403	-0.0625514	0.260335	0.240272	0.810119	0.99295
ALDH3B1	0.254998	0.42765	1.24868	0	0	0	0.259483	0.825754		0	4.11722	0	0	2.40316	1.59268	1.81489	3.46424		1.02555	-1.92987	2.03829	0.946808	0.343737	NA
ALDH4A1	83.6392	81.2535	91.1538	93.0184	100.951	63.3595	95.2303	99.0905		83.591	92.6375	69.755	86.8624	117.755	73.2634	79.8553	62.3562		85.8607	0.0764622	0.273985	-0.279074	0.780188	0.992559
ALDH5A1	11.9849	13.2572	10.6138	13.4484	18.9757	9.85592	14.531	8.25754		26.0061	10.2931	21.6481	13.1113	9.61264	14.3341	14.5191	24.2496		14.6687	0.226842	0.53039	-0.42769	0.668877	NA
ALDH6A1	119.849	135.565	163.577	141.209	80.4571	68.2875	72.1363	62.7573		48.297	57.6411	81.7817	42.6117	26.4348	28.6683	27.2234	31.1781		74.2296	0.00892509	0.312136	-0.0285936	0.977189	0.999344
ALDH7A1	498.775	485.811	472.626	498.153	343.84	284.414	357.568	346.817		196.903	197.627	194.833	191.753	151.399	103.524	101.634	117.784		283.966	0.189863	0.182135	-1.04243	0.297212	0.904573
ALDH9A1	231.793	263.433	251.609	231.425	269.455	185.151	239.243	232.037		183.9	172.923	190.022	168.808	124.964	125.822	196.008	109.123		198.482	0.282382	0.225915	-1.24995	0.211318	0.855295
ALDOC	195.328	195.864	240.371	266.167	214.805	219.646	270.9	261.764		118.885	113.224	168.374	111.446	127.367	135.378	137.932	117.784		180.952	0.0824654	0.231619	-0.356038	0.721812	0.984441
ALG1	98.4291	80.8259	69.3018	68.3629	93.3606	90.8153	77.8449	97.439		81.7335	92.6375	84.187	70.4732	93.7232	111.488	87.1149	62.3562		85.0058	0.0397624	0.272294	-0.146027	0.8839	0.997376
ALG10	21.1648	21.3825	34.3387	41.466	18.2167	9.85592	22.8345	19.8181		14.8606	20.5861	28.8641	18.028	9.61264	9.55609	12.7043	3.46424		19.1721	0.509211	0.578574	-0.880115	0.378797	NA
ALG10B	8.92492	7.6977	11.2381	17.3709	9.86738	8.44793	7.78449	16.5151		3.71516	2.05861	9.62138	9.83348	9.61264	7.96341	7.25957	5.19635		8.9442	-0.331196	0.739045	0.448141	0.654052	NA
ALG11	58.9045	53.8839	42.4552	60.518	69.8307	59.1355	81.7371	50.371		33.4364	47.348	33.6748	50.8063	43.2569	70.078	45.3723	67.5526		54.2726	-0.171045	0.332731	0.514064	0.607207	0.966302
ALG12	54.0595	52.1733	56.1907	66.1215	34.9153	47.8716	51.6371	54.4998		68.7304	57.6411	117.862	47.5285	64.8853	30.261	43.5574	53.6956		56.3519	0.334494	0.351559	-0.951459	0.341371	0.925795
ALG13	159.119	170.632	216.022	202.847	134.348	153.471	194.093	152.765		130.031	137.927	151.537	139.308	124.964	162.454	150.636	143.766		157.745	-0.288268	0.227477	1.26724	0.20507	0.853243
ALG14	9.43491	11.9742	6.24341	3.92246	6.07223	7.74394	6.74656	9.90905		11.1455	2.05861	7.21603	6.55565	4.80632	7.96341	9.07447	10.3927		7.57871	-0.386355	0.738342	0.523275	0.600783	NA
ALG1L	9.68991	4.70415	8.74077	6.72422	6.07223	4.22397	5.44914	7.43179		5.57274	0	2.40534	8.19456	7.20948	11.1488	1.81489	3.46424		5.80289	-0.858796	0.862582	0.99561	0.31944	NA
ALG1L2	0.509995	0.42765	1.87302	3.36211	0.759029	2.11198	0	0.825754		3.71516	4.11722	0	0	0	1.59268	3.62979	0		1.43277	-0.303806	1.82646	0.166336	0.867893	NA
ALG2	50.2345	47.8968	55.5663	70.044	81.2161	75.3274	77.3259	76.7951		85.4486	72.0514	69.755	73.7511	100.933	81.2268	127.043	107.391		78.2504	0.0255077	0.256822	-0.0993204	0.920884	0.999301
ALG3	127.754	87.6683	96.7728	98.6219	115.372	120.383	82.2561	105.697		139.318	102.931	134.699	109.807	67.2885	89.1902	150.636	98.7307		107.945	0.275754	0.292032	-0.944261	0.345036	0.927226
ALG5	52.7845	65.4305	51.1959	49.8713	92.6015	72.5114	63.5733	55.3255		26.0061	24.7033	31.2695	24.5837	48.0632	39.8171	39.9277	43.3029		48.8105	-0.32306	0.346458	0.932464	0.351097	0.927226
ALG6	76.4993	108.196	96.7728	103.105	84.2522	61.9515	90.5596	60.2801		48.297	43.2308	43.2962	55.723	55.2727	14.3341	34.483	27.7139		62.7479	0.25032	0.360264	-0.694826	0.487165	0.948237
ALG8	178.243	192.015	197.916	192.761	180.649	133.759	180.86	174.234		83.591	88.5202	117.862	121.28	93.7232	106.71	87.1149	103.927		139.573	-0.112665	0.224791	0.5012	0.616231	0.967997
ALKAL2	0.764993	0.42765	0.624341	0.560352	2.27709	0.703994	0.259483	0.825754		7.43031	2.05861	2.40534	0	0	0	1.81489	1.73212		1.36781	2.2409	1.76717	-1.26807	0.204771	NA
ALKBH1	49.4695	50.0351	32.4657	30.259	44.0237	57.7275	41.5173	42.9392		53.8698	28.8205	24.0534	34.4172	26.4348	33.4463	30.8532	43.3029		38.9772	0.252459	0.3858	-0.654377	0.512869	0.949426
ALKBH2	29.8347	26.0867	16.2329	31.94	22.0118	15.4879	19.4612	23.1211		14.8606	34.9964	21.6481	22.9448	36.0474	15.9268	29.0383	24.2496		23.993	-0.530453	0.447377	1.1857	0.235742	NA
ALKBH3	15.5549	11.9742	4.99473	6.72422	22.0118	10.5599	10.6388	8.25754		9.28789	14.4103	2.40534	11.4724	19.2253	19.1122	12.7043	22.5175		12.6157	-0.613575	0.653491	0.938919	0.347772	NA
ALKBH4	42.5846	36.7779	27.471	21.2934	45.5417	54.9116	23.8724	48.7195		37.1516	28.8205	60.1336	29.5004	45.66	30.261	52.6319	29.446		38.4236	0.358222	0.450962	-0.794351	0.426991	0.941795
ALKBH5	66.8094	59.871	72.4235	68.9233	40.2285	59.1355	59.9406	66.8861		182.043	199.685	228.508	173.725	281.17	258.015	379.313	230.372		151.69	-0.792803	0.245836	3.22493	0.00126006	0.0897758
ALKBH6	41.0546	29.9355	19.3546	25.7762	37.1924	34.4957	27.2457	20.6439		40.8667	34.9964	31.2695	21.3059	38.4506	27.0756	30.8532	19.0533		29.9731	0.177969	0.434001	-0.410067	0.681757	NA
ALKBH7	97.9191	79.1153	98.0215	84.0528	132.83	173.183	97.8251	117.257		167.182	137.927	182.806	181.919	218.688	167.232	248.64	178.408		147.688	0.251642	0.259764	-0.968734	0.332678	0.92238
ALKBH8	17.5948	23.0931	15.6085	12.3277	18.2167	16.1919	19.2017	25.5984		18.5758	16.4689	16.8374	31.1393	24.0316	11.1488	12.7043	32.9102		19.4781	0.271141	0.492496	-0.550544	0.581946	NA
ALMS1	188.698	197.574	192.921	184.916	137.384	135.167	180.341	136.249		577.707	652.579	505.122	586.731	480.632	531.956	435.574	597.581		357.571	-0.175494	0.183978	0.953887	0.340141	0.925795
ALOX12	4.58996	2.13825	6.24341	2.24141	2.27709	0.703994	2.85431	0.825754		7.43031	6.17583	7.21603	3.27783	0	4.77805	10.8894	1.73212		3.96086	-0.644976	1.03209	0.624921	0.532023	NA
ALOX12B	2.03998	0.42765	2.49736	1.1207	0	1.40799	1.29741	0.825754		5.57274	2.05861	2.40534	3.27783	0	0	5.44468	3.46424		1.99002	-0.0977671	1.3853	0.0705746	0.943736	NA
ALOX15	0.764993	0.42765	3.74604	2.24141	2.27709	1.40799	2.33535	1.65151		0	2.05861	0	0	0	1.59268	3.62979	0		1.38332	-0.969123	1.75645	0.55175	0.58112	NA
ALOX15B	1.01999	0	0.624341	0.560352	0	1.40799	1.03793	1.65151		0	0	0	0	0	1.59268	1.81489	0		0.606856	-0.505899	2.24727	0.225117	0.821888	NA
ALOXE3	0	0	1.24868	0	0	0.703994	0.518966	0		0	0	0	1.63891	0	1.59268	0	0		0.356452	0.514782	3.19579	-0.161081	0.87203	NA
ALPG	0.764993	2.13825	2.49736	1.1207	2.27709	4.92796	3.37328	3.30302		0	2.05861	4.81069	4.91674	0	1.59268	0	1.73212		2.21959	2.829	1.45637	-1.9425	0.0520768	NA
ALPK1	0.509995	0.8553	0.624341	0	0.759029	1.40799	0	0.825754		0	2.05861	0	0	0	3.18536	0	1.73212		0.747406	-0.758553	2.18177	0.347678	0.728082	NA
ALPK2	1.01999	1.7106	2.49736	1.1207	0	0.703994	1.03793	0.825754		0	0	0	1.63891	0	0	1.81489	0		0.773134	-1.07419	2.03777	0.527143	0.598094	NA
ALPK3	74.9693	70.1346	44.3282	58.2766	84.2522	78.1434	80.6992	82.5754		219.194	133.81	113.051	114.724	161.012	144.934	203.268	159.355		113.92	0.180626	0.287076	-0.629193	0.529222	0.952274
ALPL	385.811	369.062	488.859	424.186	217.841	255.55	212.776	255.984		482.97	454.953	464.231	358.922	266.751	203.863	223.232	187.069		328.254	0.180353	0.197866	-0.911489	0.362038	0.927226
ALPP	0.254998	0	0.624341	1.1207	0	0.703994	0.778449	0		1.85758	0	0	0	0	3.18536	1.81489	0		0.64627	-1.2331	2.31779	0.532013	0.594717	NA
ALS2	88.4842	76.977	79.2913	97.5012	90.3245	75.3274	85.6294	82.5754		174.612	123.517	129.889	145.863	156.205	132.193	123.413	122.98		111.549	0.0852726	0.216927	-0.393094	0.69425	0.978781
ALS2CL	4.58996	2.99355	11.2381	5.04317	4.55417	4.22397	3.63276	4.12877		11.1455	14.4103	16.8374	13.1113	4.80632	12.7415	10.8894	6.92847		8.20466	0.104943	0.7057	-0.148707	0.881785	NA
ALX1	7.39493	7.27005	4.99473	7.84492	0.759029	0.703994	1.03793	0		3.71516	4.11722	4.81069	6.55565	0	0	0	0		3.07527	0.587519	1.42804	-0.411417	0.680767	NA
ALX3	0	0	0.624341	0	0	0	0	0		3.71516	2.05861	9.62138	1.63891	7.20948	6.37073	1.81489	5.19635		2.39062	-0.659743	1.80863	0.364774	0.71528	NA
ALYREF	702.008	660.72	507.589	527.851	928.293	932.793	814.258	852.178		328.791	339.671	353.586	327.783	471.019	434.802	392.017	401.851		560.951	0.22058	0.174935	-1.26092	0.207336	0.855295
AMACR	10.9649	12.8295	10.6138	15.6898	7.59029	17.5999	12.9741	13.2121		7.43031	16.4689	16.8374	11.4724	7.20948	9.55609	14.5191	15.5891		12.5348	0.152472	0.567902	-0.268482	0.788328	NA
AMBP	1.27499	2.13825	1.24868	0.560352	0	0.703994	0.259483	1.65151		0	0	2.40534	0	0	0	1.81489	0		0.753593	-1.08843	2.12745	0.511614	0.608921	NA
AMBRA1	94.8591	87.6683	127.366	109.269	117.65	109.823	121.698	158.545		161.609	119.399	141.915	116.363	153.802	151.305	156.081	152.426		129.986	0.0920281	0.235671	-0.390494	0.696171	0.978793
AMD1	90.5242	109.906	55.5663	78.4492	128.276	179.519	178.524	181.666		276.779	253.209	129.889	234.365	326.83	299.424	303.087	270.21		193.514	0.576352	0.289364	-1.99179	0.0463945	0.564898
AMDHD1	0.254998	1.28295	1.24868	0.560352	0	0.703994	2.33535	0.825754		0	2.05861	0	0	0	0	1.81489	0		0.692849	0.505287	2.18781	-0.230956	0.817349	NA
AMDHD2	41.3096	21.3825	15.6085	22.4141	33.3973	44.3516	19.2017	33.8559		35.294	34.9964	31.2695	13.1113	16.8221	25.4829	39.9277	20.7854		28.0757	0.451115	0.526431	-0.85693	0.391484	NA
AMER1	50.9995	53.4563	58.0637	49.8713	26.566	36.6077	34.5112	51.1968		87.3062	82.3444	93.8084	81.9456	69.6916	78.0414	78.0404	58.892		61.9589	-0.254274	0.275869	0.921718	0.356676	0.927226
AMER2	0.509995	1.28295	0.624341	1.68106	0	0	0.518966	0		0	2.05861	2.40534	1.63891	0	3.18536	3.62979	1.73212		1.20422	-2.5899	1.81642	1.42583	0.153918	NA
AMFR	79.5593	62.0093	86.159	107.588	93.3606	97.1512	83.813	80.9239		74.3031	98.8133	125.078	90.1402	91.3201	93.9683	123.413	100.463		93.0039	-0.00469851	0.272666	0.0172317	0.986252	0.999344
AMH	4.33496	2.13825	1.87302	0.560352	3.03612	2.11198	0.259483	0		29.7213	45.2894	43.2962	21.3059	38.4506	22.2976	65.3362	20.7854		18.7998	-1.21373	0.825614	1.4701	0.141536	NA
AMIGO1	4.84495	2.13825	3.74604	5.60352	2.27709	1.40799	2.59483	2.47726		9.28789	2.05861	4.81069	6.55565	2.40316	9.55609	9.07447	3.46424		4.5188	-0.993464	0.903236	1.09989	0.271378	NA
AMIGO2	20.9098	21.3825	31.217	36.4229	14.4216	20.4158	26.9862	19.8181		31.5788	22.6447	60.1336	55.723	26.4348	30.261	38.1128	38.1066		30.9106	-0.0266378	0.434122	0.0613602	0.951072	NA
AMIGO3	20.6548	18.389	19.9789	24.0951	35.6744	40.8317	31.3974	34.6817		42.7243	28.8205	55.3229	39.3339	79.3043	55.7439	65.3362	46.7672		39.941	0.202478	0.32993	-0.6137	0.539414	0.954261
AMMECR1	94.8591	90.6619	81.7886	61.6387	78.18	76.7354	76.807	104.045		74.3031	57.6411	67.3496	55.723	62.4822	58.9293	92.5596	67.5526		75.0785	-0.137503	0.291345	0.471958	0.636957	0.971978
AMMECR1L	30.8547	25.2314	26.2223	28.0176	40.2285	33.7917	30.1	38.8105		24.1485	26.7619	16.8374	24.5837	33.6442	28.6683	27.2234	36.3745		29.4687	-0.0871373	0.375573	0.232012	0.816529	NA
AMN	0.509995	0.8553	1.87302	2.80176	0	1.40799	0	0		3.71516	4.11722	0	3.27783	0	1.59268	3.62979	5.19635		1.81107	-2.198	1.63424	1.34496	0.178638	NA
AMN1	13.5149	14.5401	20.6032	26.3365	10.6264	9.85592	9.86035	2.47726		5.57274	10.2931	9.62138	19.667	7.20948	9.55609	1.81489	3.46424		10.9383	-0.0698071	0.732065	0.0953564	0.924032	NA
AMOT	16.3198	16.6784	31.217	28.0176	8.34932	4.92796	6.48707	7.43179		16.7182	12.3517	16.8374	18.028	7.20948	4.77805	9.07447	5.19635		13.1014	-0.437863	0.635807	0.688672	0.491029	NA
AMOTL1	119.339	114.61	132.985	130.002	115.372	104.191	131.558	133.772		135.603	146.161	125.078	101.613	129.771	119.451	116.153	117.784		123.34	0.046629	0.21237	-0.219564	0.82621	0.9931
AMOTL2	121.379	95.7937	173.567	131.683	104.746	87.9993	95.2303	126.34		118.885	104.989	173.185	144.224	79.3043	84.4122	125.228	109.123		117.256	0.0980452	0.293673	-0.333858	0.738487	0.986843
AMPD2	60.4344	65.8581	66.8045	58.8369	63.7584	64.0635	55.5294	67.7118		94.7365	90.5789	67.3496	78.6678	64.8853	90.7829	90.7447	74.4811		72.2015	0.0185742	0.247314	-0.0751037	0.940132	0.999344
AMPD3	9.43491	6.8424	8.11643	7.28457	3.03612	2.11198	4.15173	4.12877		16.7182	8.23444	19.2428	11.4724	7.20948	4.77805	3.62979	8.66059		7.81579	-0.00387184	0.710911	0.0054463	0.995654	NA
AMPH	11.2199	10.6913	18.7302	10.6467	5.3132	2.81598	3.1138	1.65151		14.8606	4.11722	4.81069	4.91674	0	3.18536	3.62979	5.19635		6.55621	-0.786969	0.888481	0.885746	0.375754	NA
AMT	26.7748	20.0996	11.8625	18.4916	21.2528	35.9037	15.569	28.0756		11.1455	14.4103	12.0267	9.83348	12.0158	7.96341	23.5936	17.3212		17.8962	-0.0445252	0.579112	0.0768853	0.938715	NA
AMY2B	0	0	0.624341	0	0	0	0	0		0	0	4.81069	0	2.40316	1.59268	0	0		0.589429	-0.0766995	5.08642	0.0150793	0.987969	NA
AMZ1	0.764993	0	1.24868	1.1207	0.759029	0	0	0.825754		1.85758	2.05861	4.81069	0	0	1.59268	3.62979	5.19635		1.49155	-1.76264	1.76562	0.99831	0.318129	NA
AMZ2	60.9444	66.2858	69.3018	58.2766	53.8911	64.0635	58.6432	46.2422		70.588	119.399	110.646	96.6958	112.949	103.524	105.264	112.588		81.8314	-0.314547	0.243286	1.29291	0.196042	0.847279
ANAPC1	297.582	331.857	297.811	291.943	308.925	253.438	313.715	269.196		484.828	504.36	464.231	439.229	495.051	509.658	531.764	453.815		390.463	-0.158622	0.149705	1.05957	0.289342	0.899011
ANAPC10	14.7899	26.942	18.1059	14.0088	22.0118	20.4158	17.1259	12.3863		9.28789	8.23444	7.21603	11.4724	16.8221	12.7415	9.07447	6.92847		14.2227	-0.307958	0.595145	0.517451	0.604842	NA
ANAPC11	347.817	273.269	264.096	256.081	254.275	350.589	230.94	256.81		176.47	107.048	151.537	86.8624	134.577	101.932	139.747	107.391		202.465	0.0410017	0.280273	-0.146292	0.883691	0.997376
ANAPC13	53.8045	67.1411	37.4604	56.0352	84.2522	36.6077	50.5992	39.6362		9.28789	10.2931	7.21603	22.9448	4.80632	12.7415	9.07447	12.1248		32.1266	0.339387	0.568245	-0.597255	0.550337	NA
ANAPC15	47.4296	32.0738	29.9684	22.4141	50.0959	33.7917	38.144	23.9469		29.7213	34.9964	12.0267	14.7502	24.0316	19.1122	18.1489	25.9818		28.5396	0.211305	0.481281	-0.439046	0.660628	NA
ANAPC16	89.2492	80.8259	57.4394	89.0959	67.5536	76.0314	67.2061	58.6286		50.1546	49.4066	67.3496	42.6117	48.0632	58.9293	49.0021	39.8387		61.9616	-0.169006	0.304878	0.55434	0.579346	0.964079
ANAPC2	61.9644	54.7392	51.8203	42.0264	73.6258	76.7354	66.1682	75.1436		130.031	107.048	129.889	96.6958	110.545	101.932	119.783	110.856		88.0626	0.498966	0.239275	-2.08532	0.0370399	0.510612
ANAPC4	65.0244	83.3918	40.5822	56.0352	74.3848	74.6234	71.0983	71.0149		55.7274	57.6411	33.6748	62.2787	48.0632	78.0414	45.3723	84.8738		62.6142	-0.05537	0.342441	0.161692	0.871548	0.997243
ANAPC5	242.248	234.352	168.572	218.537	226.95	305.534	193.834	213.045		410.525	459.07	442.583	322.866	410.94	469.841	408.351	379.334		319.161	0.0779991	0.226794	-0.34392	0.730906	0.98619
ANAPC7	258.313	277.117	229.757	256.081	241.371	235.838	228.605	163.499		208.049	253.209	134.699	185.197	175.431	222.976	179.674	228.64		217.403	-0.277884	0.234305	1.18599	0.235625	0.872119
ANG	7.39493	7.27005	14.3598	8.96563	4.55417	4.92796	4.67069	5.78028		1.85758	4.11722	2.40534	1.63891	0	0	3.62979	3.46424		4.68979	-0.500574	1.13325	0.441715	0.658696	NA
ANGEL1	58.6495	61.154	64.9314	54.3541	30.3612	30.9758	31.9164	37.1589		96.5941	88.5202	86.5924	57.3619	62.4822	44.5951	56.2617	25.9818		55.4932	-0.0654341	0.304983	0.21455	0.830118	0.99312
ANGEL2	72.9293	87.6683	66.8045	67.8026	105.505	76.7354	93.1544	58.6286		48.297	53.5239	40.8908	57.3619	81.7074	92.3756	105.264	83.1416		74.4869	-0.664161	0.294185	2.25763	0.0239686	0.420337
ANGPT1	2.29498	3.84885	0	2.80176	12.9035	18.3039	11.4173	15.6893		1.85758	4.11722	2.40534	0	9.61264	6.37073	7.25957	5.19635		6.50493	0.795037	1.00203	-0.79343	0.427527	NA
ANGPT2	0.254998	1.7106	1.87302	3.36211	0	0.703994	1.03793	0.825754		0	6.17583	0	3.27783	0	1.59268	1.81489	0		1.41435	0.0972764	1.79495	-0.0541944	0.95678	NA
ANGPTL1	0.509995	0	0.624341	0	0	0	0	0		1.85758	0	2.40534	0	4.80632	0	0	0		0.637724	-1.39362	2.78547	0.500319	0.61685	NA
ANGPTL2	33.6597	24.8037	24.9736	22.4141	11.3854	14.7839	8.30346	17.3408		29.7213	28.8205	16.8374	19.667	16.8221	14.3341	14.5191	5.19635		18.9739	-0.179386	0.513516	0.349328	0.726843	NA
ANGPTL4	4.58996	1.7106	7.49209	5.60352	1.51806	3.51997	6.22759	0.825754		9.28789	0	4.81069	1.63891	0	4.77805	3.62979	1.73212		3.58531	0.0178425	1.19256	-0.0149615	0.988063	NA
ANGPTL6	1.01999	0	0.624341	1.1207	0.759029	2.11198	0.259483	0		5.57274	0	7.21603	1.63891	2.40316	7.96341	1.81489	0		2.03154	0.197632	1.56428	-0.126341	0.899462	NA
ANK1	15.0449	19.2443	21.8519	20.733	12.1445	5.63195	10.1198	7.43179		39.0092	26.7619	43.2962	21.3059	14.419	14.3341	12.7043	22.5175		19.1594	-0.0738027	0.482108	0.153083	0.878333	NA
ANK2	79.3043	80.3982	59.9367	56.0352	68.3126	67.5835	57.0863	53.674		250.773	199.685	168.374	231.087	197.059	313.758	215.972	277.139		148.511	-0.420736	0.255866	1.64436	0.100102	0.723155
ANK3	122.399	135.565	137.355	124.398	97.1557	75.3274	77.8449	56.977		144.891	137.927	151.537	163.891	91.3201	125.822	68.9659	98.7307		113.132	-0.123542	0.246485	0.501217	0.616218	0.967997
ANKAR	1.27499	0.8553	0.624341	1.68106	0	0.703994	0.518966	0.825754		9.28789	4.11722	2.40534	1.63891	0	4.77805	3.62979	1.73212		2.12961	-0.434327	1.40344	0.309472	0.756962	NA
ANKDD1A	4.33496	3.84885	6.24341	2.80176	4.55417	4.22397	1.29741	2.47726		1.85758	6.17583	7.21603	4.91674	2.40316	1.59268	3.62979	6.92847		4.03138	-0.142434	0.991316	0.143681	0.885752	NA
ANKEF1	27.0297	31.2185	33.0901	31.94	28.8431	16.1919	16.8664	18.1666		22.2909	22.6447	12.0267	22.9448	14.419	19.1122	9.07447	25.9818		21.9901	-0.41356	0.459041	0.900923	0.367629	NA
ANKFY1	109.139	117.604	134.858	128.321	115.372	108.415	123.773	153.59		163.467	119.399	153.942	139.308	122.561	144.934	150.636	148.962		133.393	0.0508107	0.216599	-0.234584	0.814531	0.9931
ANKH	6.11994	5.9871	10.6138	8.96563	9.10835	6.33595	8.04397	8.25754		16.7182	16.4689	12.0267	19.667	7.20948	17.5195	18.1489	15.5891		11.6738	0.186082	0.555867	-0.33476	0.737806	NA
ANKHD1-EIF4EBP3	0.509995	0.8553	1.24868	0	0	0.703994	0.778449	0.825754		0	0	2.40534	3.27783	0	1.59268	0	1.73212		0.870634	0.579245	1.99868	-0.289814	0.771959	NA
ANKIB1	47.1746	51.318	61.1854	49.311	47.0598	35.1997	45.15	41.2877		135.603	102.931	117.862	137.669	132.174	133.785	134.302	150.694		88.9191	-0.434747	0.233935	1.85841	0.0631107	0.626769
ANKK1	0.254998	0.42765	0	0	0.759029	0	0	0		0	0	0	0	0	0	0	3.46424		0.30662	-1.49557	3.5493	0.421372	0.673483	NA
ANKLE1	19.3798	17.9613	21.2276	19.052	15.9396	27.4558	25.9483	30.5529		57.5849	22.6447	36.0802	24.5837	36.0474	43.0024	52.6319	29.446		29.9712	0.171519	0.402966	-0.425641	0.670369	NA
ANKLE2	138.974	143.263	127.99	135.045	143.456	155.583	123.514	107.348		269.349	205.861	245.345	227.809	281.17	258.015	245.011	254.621		191.397	-0.175338	0.187856	0.933365	0.350631	0.927226
ANKMY1	2.80497	1.28295	0.624341	0	3.03612	0	1.29741	1.65151		5.57274	14.4103	7.21603	3.27783	2.40316	1.59268	5.44468	6.92847		3.59645	0.953126	1.16718	-0.816604	0.414155	NA
ANKMY2	49.7245	43.6203	48.0742	57.7162	22.7709	11.2639	22.575	14.8636		24.1485	12.3517	19.2428	18.028	2.40316	6.37073	12.7043	17.3212		23.9487	-0.560076	0.514006	1.08963	0.275876	NA
ANKRA2	9.43491	14.1125	16.8572	20.1727	7.59029	9.85592	10.6388	11.5606		9.28789	26.7619	9.62138	9.83348	21.6284	9.55609	9.07447	6.92847		12.6822	-0.283934	0.610832	0.464832	0.642052	NA
ANKRD1	4.58996	8.12535	19.9789	16.2502	0.759029	1.40799	1.5569	2.47726		0	0	4.81069	3.27783	0	0	0	0		3.95213	-0.447281	1.53531	0.291329	0.7708	NA
ANKRD10	114.494	109.478	79.2913	67.8026	97.9148	132.351	69.0225	76.7951		178.328	172.923	161.158	126.196	170.624	127.415	165.155	145.498		124.653	0.0707302	0.305845	-0.231261	0.817112	0.9931
ANKRD11	31.8747	34.6397	39.3335	35.3022	26.566	23.9358	17.6448	16.5151		102.167	123.517	103.43	109.807	141.786	129.007	141.562	98.7307		73.4886	-0.971186	0.271912	3.57169	0.000354679	0.0422136
ANKRD12	19.3798	28.2249	38.0848	47.0695	20.4938	17.5999	28.2836	18.1666		156.037	191.451	168.374	281.893	163.415	207.049	114.338	261.55		110.088	-0.494643	0.399164	1.2392	0.215271	0.858704
ANKRD13A	27.7947	32.9291	26.8467	44.8281	37.9515	50.6876	36.3276	33.0302		35.294	32.9378	33.6748	47.5285	31.2411	35.039	23.5936	41.5708		35.7047	0.453925	0.373667	-1.21479	0.224448	0.859873
ANKRD13B	19.8898	16.6784	13.7355	16.8106	9.86738	15.4879	17.9043	16.5151		44.5819	22.6447	19.2428	36.0561	21.6284	20.7049	19.9638	24.2496		20.9976	0.377702	0.441351	-0.855787	0.392116	NA
ANKRD13C	22.9498	22.2378	15.6085	20.1727	41.7466	26.7518	22.8345	26.4241		40.8667	39.1136	45.7015	57.3619	72.0948	78.0414	74.4106	72.7489		42.4416	-0.2106	0.337013	0.624902	0.532035	0.952274
ANKRD13D	8.41492	5.55945	6.86775	8.40528	6.07223	6.33595	7.52501	10.7348		37.1516	24.7033	33.6748	37.695	33.6442	28.6683	39.9277	39.8387		20.9512	-0.0438946	0.446312	0.0983494	0.921655	NA
ANKRD16	15.0449	15.3954	11.8625	7.28457	9.86738	11.2639	7.00604	12.3863		37.1516	22.6447	55.3229	34.4172	36.0474	17.5195	16.334	24.2496		20.8624	0.305533	0.49192	-0.621104	0.534531	NA
ANKRD17	430.691	486.666	506.965	473.497	447.068	356.221	482.638	421.96		462.537	529.063	413.719	458.896	463.81	501.695	435.574	510.975		461.373	-0.182738	0.164967	1.10772	0.267982	0.886853
ANKRD18A	3.82496	2.5659	1.87302	1.1207	1.51806	2.81598	4.41121	1.65151		9.28789	14.4103	12.0267	18.028	16.8221	36.6317	10.8894	24.2496		10.1329	-0.525912	0.73563	0.714914	0.474662	NA
ANKRD18B	2.29498	2.5659	0.624341	1.1207	0	1.40799	0.778449	1.65151		24.1485	26.7619	14.4321	37.695	9.61264	14.3341	10.8894	15.5891		10.2442	0.0402199	0.846544	-0.0475107	0.962106	NA
ANKRD23	0.254998	0	1.24868	0.560352	0.759029	0	0.778449	0		3.71516	8.23444	2.40534	3.27783	0	3.18536	5.44468	5.19635		2.19129	0.402747	1.51991	-0.264981	0.791024	NA
ANKRD24	9.94491	11.1189	10.6138	5.60352	3.79515	9.85592	8.04397	5.78028		11.1455	24.7033	28.8641	8.19456	16.8221	19.1122	14.5191	6.92847		12.1904	-0.114363	0.6116	0.186989	0.851669	NA
ANKRD26	13.5149	19.2443	19.9789	22.9744	16.6986	16.1919	32.4354	18.9923		37.1516	39.1136	50.5122	47.5285	36.0474	41.4097	34.483	69.2847		32.2226	0.169813	0.424878	-0.399674	0.689396	NA
ANKRD27	61.4544	65.8581	73.6722	76.2078	37.1924	40.1277	40.9983	47.8937		167.182	148.22	165.969	144.224	72.0948	87.5975	87.1149	72.7489		86.7847	0.226988	0.234542	-0.967795	0.333147	0.92238
ANKRD28	122.909	141.125	110.508	128.321	136.625	102.079	115.47	93.3102		100.309	123.517	96.2138	134.391	161.012	146.527	105.264	136.837		122.151	-0.425719	0.238658	1.7838	0.0744556	0.651012
ANKRD29	1.52999	1.7106	1.24868	2.80176	1.51806	1.40799	1.29741	0.825754		0	8.23444	2.40534	1.63891	2.40316	0	0	1.73212		1.79714	1.17479	1.53745	-0.764119	0.444797	NA
ANKRD31	0.509995	0	0.624341	0.560352	0	0	0.778449	0		3.71516	0	0	4.91674	0	0	1.81489	3.46424		1.02401	0.361297	2.11015	-0.171218	0.864052	NA
ANKRD33	0	0	0	0.560352	0.759029	0	0.259483	0.825754		1.85758	0	4.81069	0	0	0	0	0		0.567055	3.88072	2.65436	-1.46202	0.143737	NA
ANKRD33B	6.62994	3.4212	3.1217	6.16387	9.10835	14.7839	6.22759	10.7348		14.8606	18.5275	21.6481	9.83348	14.419	30.261	23.5936	10.3927		12.733	0.649554	0.611346	-1.0625	0.288009	NA
ANKRD34A	0.509995	0.42765	1.87302	0	0	0	0	0		0	0	2.40534	0	0	0	0	0		0.326001	-1.88535	3.40653	0.553453	0.579954	NA
ANKRD34B	0.509995	0	0.624341	1.1207	0	0	0.778449	0		7.43031	2.05861	2.40534	0	0	0	0	1.73212		1.04124	1.61236	2.1562	-0.747779	0.454593	NA
ANKRD35	21.6748	32.9291	16.2329	24.0951	39.4695	40.1277	25.9483	34.6817		16.7182	20.5861	31.2695	19.667	31.2411	47.7805	18.1489	22.5175		27.693	0.0580741	0.455586	-0.127471	0.898567	NA
ANKRD36	1.27499	0.8553	0.624341	0.560352	0.759029	2.11198	0.778449	0.825754		3.71516	4.11722	2.40534	4.91674	12.0158	11.1488	9.07447	12.1248		4.20678	-1.29325	1.07232	1.20603	0.227807	NA
ANKRD36B	0.509995	0.8553	0	0.560352	0.759029	0.703994	1.29741	1.65151		1.85758	2.05861	9.62138	1.63891	9.61264	7.96341	1.81489	6.92847		2.98959	0.256035	1.27618	-0.200626	0.840991	NA
ANKRD36C	1.52999	0.42765	0	1.1207	0	1.40799	0.259483	0.825754		5.57274	8.23444	0	9.83348	2.40316	9.55609	7.25957	8.66059		3.56823	-0.90436	1.26277	0.716171	0.473886	NA
ANKRD37	1.52999	2.13825	4.99473	3.36211	1.51806	3.51997	8.30346	7.43179		1.85758	0	0	3.27783	4.80632	7.96341	7.25957	3.46424		3.83921	-1.11949	1.21546	0.921045	0.357027	NA
ANKRD39	25.4998	24.8037	8.74077	12.8881	47.8188	54.2076	17.6448	32.2044		14.8606	26.7619	28.8641	18.028	16.8221	19.1122	12.7043	17.3212		23.6427	1.42647	0.58678	-2.43101	0.0150569	NA
ANKRD40	74.9693	76.977	48.6986	50.4317	67.5536	80.2554	58.6432	61.1058		79.8759	78.2272	60.1336	101.613	103.336	84.4122	90.7447	100.463		76.09	-0.155834	0.29202	0.533643	0.593589	0.964498
ANKRD42	3.56997	5.55945	4.99473	5.60352	1.51806	5.63195	6.22759	6.60603		3.71516	0	2.40534	1.63891	2.40316	6.37073	5.44468	0		3.85558	-0.833208	1.12084	0.74338	0.457252	NA
ANKRD44	2.29498	1.7106	1.87302	1.68106	0	0	2.33535	0.825754		0	2.05861	2.40534	0	0	0	0	0		0.949045	0.546687	2.04518	-0.267305	0.789234	NA
ANKRD46	62.9844	63.7199	72.4235	71.725	78.939	65.4715	74.7311	61.1058		27.8637	32.9378	43.2962	29.5004	31.2411	39.8171	36.2979	36.3745		51.7768	-0.0781741	0.314743	0.248374	0.803845	0.992559
ANKRD49	13.2599	12.8295	12.4868	7.84492	16.6986	9.85592	15.05	10.7348		24.1485	18.5275	19.2428	13.1113	14.419	19.1122	18.1489	24.2496		15.6075	0.131084	0.493154	-0.265807	0.790388	NA
ANKRD50	71.9093	69.707	74.9209	81.251	62.9994	44.3516	40.7388	33.0302		124.458	144.103	101.024	150.78	129.771	133.785	101.634	121.248		92.857	-0.616128	0.257727	2.39062	0.0168198	0.362144
ANKRD52	69.1044	48.7521	85.5347	58.2766	42.5056	39.4237	40.9983	47.068		117.027	84.403	141.915	72.1122	76.9011	82.8195	98.0042	86.6059		74.4658	-0.372633	0.303956	1.22595	0.220219	0.859379
ANKRD53	0.509995	0	0	0.560352	0	0	0.259483	0		0	2.05861	0	0	0	1.59268	0	0		0.31132	-0.654364	3.1891	0.205188	0.837425	NA
ANKRD54	14.0249	4.70415	8.11643	10.0863	16.6986	19.0078	14.2716	15.6893		22.2909	16.4689	9.62138	11.4724	14.419	20.7049	32.6681	20.7854		15.6894	0.206267	0.542825	-0.379988	0.703954	NA
ANKRD6	9.68991	5.55945	4.99473	7.84492	3.79515	3.51997	1.5569	0		16.7182	12.3517	26.4588	22.9448	14.419	19.1122	19.9638	10.3927		11.2076	-1.49161	0.664927	2.24327	0.0248791	NA
ANKRD63	0.764993	0	0.624341	0.560352	0	0	0	0.825754		0	2.05861	2.40534	1.63891	0	0	0	1.73212		0.663152	-0.0504261	2.32116	0.0217245	0.982668	NA
ANKRD65	0	0	0.624341	0	0.759029	1.40799	0.259483	0		1.85758	0	0	3.27783	2.40316	0	1.81489	1.73212		0.883526	2.05919	2.16633	-0.950542	0.341837	NA
ANKRD9	4.33496	2.13825	4.37039	5.60352	4.55417	2.11198	1.5569	4.95453		167.182	150.279	254.966	158.975	108.142	108.302	163.34	74.4811		75.9558	0.168149	0.518259	-0.324449	0.745598	0.987645
ANKS1A	130.049	108.623	144.223	127.2	100.951	130.239	125.33	99.9163		191.331	127.634	197.238	126.196	206.672	144.934	143.377	128.177		139.506	-0.100804	0.253636	0.397437	0.691045	0.978781
ANKS1B	3.56997	4.70415	7.49209	3.92246	1.51806	0.703994	0.518966	0.825754		5.57274	4.11722	0	6.55565	2.40316	0	0	0		2.61901	0.346445	1.47544	-0.234808	0.814358	NA
ANKS3	12.7499	15.8231	9.36511	10.0863	15.1806	23.9358	18.1638	14.8636		31.5788	30.8792	26.4588	24.5837	45.66	50.9658	49.0021	43.3029		26.4125	-0.175732	0.391206	0.449205	0.653284	NA
ANKS6	35.4447	24.8037	24.9736	20.1727	12.1445	23.2318	10.3793	18.1666		169.04	135.868	158.753	109.807	79.3043	60.5219	70.7808	81.4095		64.6751	0.16156	0.353536	-0.456983	0.647683	0.976236
ANKZF1	62.4744	69.2793	93.6511	96.3805	50.0959	46.4636	91.338	91.6587		85.4486	111.165	98.6191	118.002	86.5138	70.078	130.672	105.659		87.9687	-0.107743	0.34999	0.307846	0.7582	0.989676
ANLN	228.988	322.448	370.234	360.867	330.937	247.806	407.648	326.173		247.058	294.381	226.102	331.06	281.17	297.832	245.011	368.941		305.416	-0.0751548	0.263084	0.285669	0.775132	0.992448
ANO1	3.31497	4.2765	4.37039	2.80176	3.79515	2.81598	4.93018	0.825754		7.43031	4.11722	0	3.27783	4.80632	6.37073	3.62979	1.73212		3.65594	-0.232176	1.00812	0.230305	0.817855	NA
ANO10	132.854	146.256	149.217	165.864	144.216	92.2233	152.317	141.204		81.7335	104.989	93.8084	95.0569	64.8853	78.0414	70.7808	90.0701		112.72	0.139341	0.261524	-0.532802	0.59417	0.964498
ANO2	3.82496	2.13825	1.87302	0	3.03612	1.40799	1.81638	2.47726		9.28789	6.17583	7.21603	4.91674	4.80632	4.77805	3.62979	1.73212		3.6948	0.869543	1.03447	-0.840568	0.40059	NA
ANO3	0.509995	0	0	0.560352	0	0	0.259483	0		0	0	2.40534	0	0	0	0	0		0.233448	0.074055	3.75023	-0.0197468	0.984245	NA
ANO4	1.52999	2.5659	5.61907	1.68106	3.79515	1.40799	2.07586	3.30302		7.43031	0	7.21603	3.27783	2.40316	1.59268	0	1.73212		2.85188	1.58728	1.28901	-1.2314	0.218175	NA
ANO5	22.1848	31.6461	38.7091	42.5867	26.566	19.0078	27.5052	16.5151		24.1485	28.8205	31.2695	22.9448	19.2253	27.0756	14.5191	25.9818		26.1691	-0.268091	0.447469	0.599128	0.549088	NA
ANO6	145.859	178.758	167.948	163.623	197.348	160.511	193.315	151.113		109.597	129.692	76.971	129.474	192.253	189.529	156.081	202.658		159.046	-0.608256	0.220516	2.75833	0.00580967	0.210082
ANO7	9.17991	5.1318	4.37039	6.72422	3.03612	3.51997	3.89224	6.60603		3.71516	2.05861	7.21603	4.91674	4.80632	3.18536	10.8894	10.3927		5.60256	-1.38632	0.848286	1.63426	0.102204	NA
ANO8	24.9898	18.389	23.7249	22.4141	24.2889	24.6398	13.4931	19.8181		94.7365	131.751	187.617	154.058	81.7074	60.5219	125.228	86.6059		68.3739	0.503369	0.361826	-1.39119	0.164167	0.806931
ANO9	2.54998	4.2765	6.86775	7.84492	2.27709	4.92796	2.33535	1.65151		5.57274	12.3517	36.0802	14.7502	0	11.1488	12.7043	8.66059		8.37497	0.0721002	0.833639	-0.0864885	0.931078	NA
ANOS1	604.854	632.495	633.082	652.81	680.09	637.819	558.667	502.059		456.964	450.836	437.773	434.312	473.423	484.175	373.868	382.798		524.751	-0.0291667	0.164818	0.176963	0.859537	0.995372
ANP32A	790.238	810.397	653.685	683.069	851.631	765.242	905.596	723.361		187.615	226.447	156.347	216.336	225.897	205.456	154.266	233.836		486.839	0.0961239	0.203125	-0.473225	0.636053	0.971858
ANP32B	265.198	307.908	334.022	361.987	466.803	389.309	475.632	347.643		83.591	76.1686	60.1336	119.641	134.577	136.971	108.894	116.052		236.533	-0.110084	0.251722	0.437323	0.661877	0.978336
ANP32D	5.09995	9.83596	3.74604	5.60352	9.10835	12.6719	10.3793	8.25754		1.85758	0	0	0	0	0	0	0		4.16001	1.53222	1.57205	-0.974664	0.329727	NA
ANP32E	447.776	554.662	301.557	407.936	595.838	411.133	560.483	389.756		104.024	111.165	88.9977	122.918	158.609	160.861	83.4851	143.766		290.185	-0.153838	0.305095	0.50423	0.6141	0.967156
ANPEP	6.11994	5.55945	6.24341	8.96563	4.55417	1.40799	2.59483	4.95453		5.57274	4.11722	4.81069	4.91674	4.80632	4.77805	3.62979	1.73212		4.67273	-0.650989	0.918893	0.708449	0.478667	NA
ANTKMT	22.1848	12.8295	14.9842	19.052	34.9153	49.2796	38.663	42.9392		24.1485	24.7033	36.0802	27.8615	33.6442	44.5951	49.0021	43.3029		32.3866	0.605188	0.374924	-1.61416	0.106492	NA
ANTXR1	100.214	94.0831	79.9156	87.4149	70.5897	73.9194	44.8906	61.9316		35.294	39.1136	31.2695	27.8615	19.2253	41.4097	19.9638	31.1781		53.6421	-0.340181	0.362455	0.938545	0.347965	0.927226
ANTXR2	13.2599	14.1125	16.2329	13.4484	6.83126	6.33595	7.26552	4.95453		7.43031	18.5275	0	6.55565	4.80632	3.18536	5.44468	5.19635		8.34919	-0.285675	0.742694	0.384648	0.700499	NA
ANXA1	2.80497	4.2765	5.61907	7.84492	30.3612	12.6719	19.9802	13.2121		0	0	0	1.63891	2.40316	7.96341	9.07447	3.46424		7.58219	-1.35363	1.24299	1.08901	0.276152	NA
ANXA11	163.453	140.269	165.45	160.261	135.866	143.615	137.007	163.499		120.743	119.399	158.753	134.391	112.949	76.4488	105.264	100.463		133.614	0.317058	0.212725	-1.49046	0.136104	0.766486
ANXA2	234.343	275.834	275.959	291.383	518.417	437.884	604.336	518.574		89.1638	121.458	103.43	81.9456	189.85	159.268	159.711	197.461		266.189	0.112627	0.216906	-0.519245	0.60359	0.966149
ANXA2R	1.01999	1.28295	1.87302	0	0.759029	0.703994	0.518966	0.825754		1.85758	0	0	0	0	1.59268	1.81489	0		0.765554	-1.25188	2.05335	0.609679	0.542075	NA
ANXA3	60.1794	66.7134	49.9473	53.7938	88.8064	50.6876	62.0164	40.462		29.7213	16.4689	24.0534	26.2226	12.0158	19.1122	14.5191	20.7854		39.7191	0.58794	0.436902	-1.3457	0.178399	0.829703
ANXA5	539.065	627.791	533.811	561.472	567.754	430.141	640.404	478.937		165.324	207.92	173.185	152.419	122.561	197.493	168.785	142.034		356.818	0.0382696	0.226176	-0.169202	0.865637	0.995372
ANXA6	347.817	354.95	402.7	391.125	369.647	330.173	500.024	461.597		170.897	170.865	137.105	116.363	175.431	152.898	154.266	126.445		272.644	0.127096	0.231603	-0.548766	0.583166	0.964079
ANXA7	239.953	215.963	224.763	240.391	305.889	302.718	309.563	270.022		169.04	174.982	120.267	139.308	187.446	195.9	161.526	164.551		213.893	0.143065	0.180977	-0.790517	0.429226	0.941795
ANXA9	2.03998	2.13825	1.24868	5.04317	1.51806	0.703994	2.59483	0.825754		5.57274	2.05861	0	1.63891	2.40316	3.18536	0	0		1.93572	0.0780211	1.4719	-0.0530071	0.957726	NA
AOC1	0.254998	0	0	0.560352	0	0	0.259483	0.825754		1.85758	0	0	0	0	0	0	0		0.234885	1.17548	3.414	-0.344313	0.730611	NA
AOC2	0.509995	0.42765	1.24868	0	0	0	0	0		20.4334	22.6447	19.2428	22.9448	4.80632	14.3341	19.9638	29.446		9.75014	-2.00093	1.33356	1.50044	0.1335	NA
AOC3	0	0.42765	1.24868	0	0	0	0	0		13.0031	8.23444	9.62138	9.83348	12.0158	3.18536	7.25957	17.3212		5.13441	-1.54825	1.51878	1.01941	0.308009	NA
AOPEP	7.13993	11.1189	13.1112	16.8106	6.07223	4.92796	11.9362	8.25754		22.2909	28.8205	24.0534	8.19456	16.8221	12.7415	18.1489	8.66059		13.6942	0.0378242	0.607758	-0.0622356	0.950375	NA
AOX1	24.2248	27.3696	16.2329	18.4916	10.6264	6.33595	5.70863	4.12877		24.1485	12.3517	28.8641	16.3891	2.40316	15.9268	1.81489	5.19635		13.7633	-0.152263	0.643623	0.236572	0.812989	NA
AP000349.1	0.764993	0.8553	1.24868	0.560352	0.759029	0	0.778449	0		9.28789	6.17583	14.4321	13.1113	2.40316	7.96341	9.07447	1.73212		4.32169	0.205209	1.2071	-0.170002	0.865008	NA
AP000721.1	31.3647	37.6332	19.3546	20.1727	40.9876	8.44793	24.9104	10.7348		48.297	34.9964	45.7015	59.0009	64.8853	36.6317	72.5957	51.9635		37.9799	-0.603133	0.516372	1.16802	0.242799	0.873153
AP001781.2	0	0	0	0	0	1.40799	0.778449	0		0	2.05861	2.40534	0	2.40316	0	0	0		0.565847	3.68539	2.75559	-1.33742	0.181085	NA
AP002495.1	2.80497	2.13825	4.99473	0.560352	0.759029	4.22397	1.29741	1.65151		5.57274	0	4.81069	1.63891	4.80632	1.59268	3.62979	3.46424		2.7466	-0.588862	1.22102	0.48227	0.629615	NA
AP002748.5	6.62994	2.99355	0.624341	1.68106	15.1806	4.92796	4.67069	0.825754		13.0031	4.11722	9.62138	3.27783	12.0158	9.55609	14.5191	5.19635		6.80255	0.508211	0.97847	-0.519393	0.603486	NA
AP002990.1	0.254998	0	0	0	0	0	0	0		0	2.05861	0	0	0	0	3.62979	1.73212		0.47972	-1.50258	3.09554	0.485404	0.62739	NA
AP003108.2	0.764993	0.8553	1.24868	0.560352	0.759029	0	1.29741	0		0	0	0	0	0	0	0	3.46424		0.559375	-1.8657	2.37674	0.784984	0.432463	NA
AP1AR	20.1448	28.2249	14.9842	20.1727	23.5299	14.7839	19.2017	12.3863		24.1485	41.1722	26.4588	31.1393	40.8537	47.7805	12.7043	29.446		25.4457	-0.339327	0.460183	0.737375	0.460895	NA
AP1B1	335.832	331.001	427.049	354.703	466.044	427.325	466.031	494.627		334.364	292.323	315.1	275.337	372.49	379.058	382.942	318.71		373.309	0.102462	0.165952	-0.617416	0.536961	0.953921
AP1G1	194.308	231.786	207.281	211.813	154.083	129.535	161.398	169.28		124.458	133.81	129.889	131.113	108.142	97.1536	101.634	121.248		150.433	-0.176461	0.204283	0.863805	0.387695	0.93361
AP1G2	56.0995	49.6074	68.6775	69.4836	91.8425	70.3994	92.3759	99.0905		98.4517	78.2272	127.483	98.3348	93.7232	93.9683	194.194	119.516		93.8422	0.217224	0.30685	-0.707914	0.478999	0.948237
AP1M1	74.7143	92.8001	65.5558	62.199	62.9994	71.8074	71.0983	75.9694		74.3031	65.8755	48.1069	63.9176	69.6916	44.5951	59.8915	53.6956		66.0763	0.105179	0.286118	-0.367608	0.713166	0.981968
AP1M2	271.062	272.413	378.975	356.944	349.912	414.653	416.989	454.165		183.9	179.099	240.534	219.614	228.3	235.717	261.345	240.764		294.024	0.124105	0.209022	-0.593744	0.552684	0.957679
AP1S1	70.3793	82.1088	83.0373	86.8545	71.3487	90.1113	73.4337	93.3102		44.5819	28.8205	67.3496	18.028	26.4348	27.0756	34.483	32.9102		58.1417	0.359232	0.352163	-1.02007	0.307693	0.913172
AP1S2	349.347	386.168	357.123	446.04	346.117	325.949	390.522	312.961		165.324	238.799	199.644	222.892	206.672	238.902	179.674	209.586		285.983	-0.172014	0.197817	0.86956	0.384541	0.933167
AP1S3	12.7499	16.6784	11.2381	19.6123	4.55417	8.44793	4.15173	4.95453		3.71516	8.23444	2.40534	1.63891	0	1.59268	1.81489	6.92847		6.79481	-0.965123	0.951063	1.01478	0.310209	NA
AP2A1	257.548	242.905	345.26	283.538	325.623	319.613	329.024	408.748		371.516	376.726	430.557	324.505	374.893	399.763	493.651	389.726		354.6	0.146325	0.198823	-0.735956	0.461757	0.944079
AP2A2	2.29498	0.8553	2.49736	2.80176	0	4.92796	3.89224	2.47726		0	0	0	0	2.40316	0	0	3.46424		1.60089	-1.48027	1.75226	0.844777	0.398235	NA
AP2B1	609.699	727.005	985.834	861.261	800.017	649.787	1037.93	870.345		516.407	578.469	481.069	658.843	569.549	570.18	597.1	521.367		689.679	0.0684708	0.22858	-0.299549	0.764522	0.991803
AP2M1	704.813	682.53	638.076	634.878	903.245	799.034	835.276	765.474		573.992	549.649	512.338	499.868	824.284	826.602	829.406	803.703		711.448	-0.309859	0.124036	2.49814	0.0124845	0.311808
AP2S1	348.582	327.152	203.535	249.917	404.562	435.069	295.811	298.923		135.603	107.048	117.862	78.6678	136.98	121.044	137.932	143.766		221.403	0.0359726	0.285755	-0.125886	0.899822	0.997922
AP3B1	205.783	252.741	232.879	227.503	168.504	161.215	241.838	181.666		170.897	162.63	103.43	183.558	161.012	189.529	143.377	136.837		182.712	-0.286097	0.246372	1.16124	0.245544	0.877973
AP3B2	14.2799	14.5401	26.8467	21.2934	4.55417	9.15193	7.26552	4.12877		18.5758	18.5275	12.0267	21.3059	0	3.18536	10.8894	6.92847		12.0937	0.157175	0.671558	-0.234046	0.81495	NA
AP3D1	366.177	351.956	374.604	384.962	444.032	513.212	486.012	569.77		468.11	512.594	526.77	411.367	728.158	680.075	624.323	678.99		507.57	-0.0578214	0.149118	0.387756	0.698197	0.978793
AP3M1	126.734	163.79	166.075	162.502	88.0474	96.4472	99.1225	88.3557		46.4395	65.8755	74.5657	78.6678	60.079	65.3	56.2617	64.0884		93.8969	-0.61416	0.260529	2.35736	0.0184055	0.379502
AP3M2	26.7748	20.9549	28.7197	30.8193	20.4938	20.4158	21.0181	17.3408		13.0031	20.5861	24.0534	21.3059	21.6284	14.3341	25.4085	15.5891		21.4029	-0.370308	0.439772	0.842046	0.399762	NA
AP3S1	59.9244	85.53	53.6933	59.3973	56.1682	92.9273	58.9026	49.5453		44.5819	34.9964	28.8641	40.9728	16.8221	35.039	30.8532	22.5175		48.171	0.48059	0.391699	-1.22694	0.219846	0.858704
AP3S2	11.2199	15.3954	9.98945	16.2502	7.59029	18.3039	10.6388	11.5606		1.85758	0	0	0	9.61264	11.1488	0	0		7.72297	-3.22721	1.24285	2.59663	0.00941437	NA
AP4B1	29.5797	26.942	21.8519	11.7674	35.6744	35.9037	29.8405	18.1666		26.0061	43.2308	12.0267	22.9448	40.8537	38.2244	45.3723	46.7672		30.322	-0.318715	0.452477	0.704379	0.481197	NA
AP4E1	31.8747	36.7779	30.5927	29.6986	28.8431	40.1277	36.3276	18.1666		55.7274	37.055	38.4855	34.4172	36.0474	52.5585	39.9277	43.3029		36.8707	-0.10228	0.361603	0.28285	0.777291	0.992448
AP4M1	25.4998	19.6719	22.4763	22.4141	18.9757	28.1598	22.3155	17.3408		26.0061	39.1136	21.6481	22.9448	21.6284	19.1122	34.483	31.1781		24.5605	-0.0147427	0.407873	0.0361452	0.971167	NA
AP4S1	14.5349	22.2378	9.36511	10.6467	17.4577	13.3759	10.6388	4.95453		5.57274	6.17583	2.40534	6.55565	7.20948	3.18536	0	3.46424		8.61125	0.400315	0.884185	-0.45275	0.650729	NA
AP5B1	41.3096	26.942	55.5663	45.9488	22.0118	26.7518	21.5371	23.9469		78.0183	82.3444	156.347	86.8624	33.6442	41.4097	59.8915	38.1066		52.5399	0.348985	0.377152	-0.925316	0.354801	0.927226
AP5M1	40.5446	45.7586	55.5663	31.94	40.2285	38.7197	54.4914	38.8105		46.4395	63.8169	55.3229	78.6678	91.3201	98.7463	78.0404	116.052		60.9041	-0.624163	0.314112	1.98707	0.0469144	0.568344
AP5S1	3.31497	5.55945	7.49209	4.48281	6.07223	5.63195	5.44914	6.60603		1.85758	2.05861	4.81069	11.4724	2.40316	1.59268	9.07447	6.92847		5.30042	0.278281	0.871354	-0.319366	0.749449	NA
AP5Z1	39.5246	28.6526	34.3387	25.2158	30.3612	34.4957	40.7388	52.0225		81.7335	45.2894	76.971	49.1674	67.2885	60.5219	119.783	60.6241		52.9205	-0.00113199	0.368385	0.00307284	0.997548	0.99993
APAF1	34.1697	49.6074	70.5505	68.9233	31.1202	34.4957	43.5931	43.765		31.5788	49.4066	38.4855	32.7783	36.0474	38.2244	45.3723	39.8387		42.9973	-0.595823	0.387646	1.53703	0.124286	0.753463
APBA1	0.254998	0.42765	0.624341	0	0	0.703994	0	0		3.71516	0	2.40534	1.63891	0	0	0	1.73212		0.718907	0.969662	2.30253	-0.42113	0.67366	NA
APBA3	19.8898	15.3954	18.7302	19.052	30.3612	33.0877	21.5371	26.4241		63.1577	32.9378	81.7817	32.7783	67.2885	63.7073	74.4106	64.0884		41.5392	0.194548	0.361766	-0.537773	0.590734	0.964498
APBB1	79.5593	56.4498	95.5241	70.044	59.9633	47.8716	52.1561	53.674		94.7365	78.2272	103.43	101.613	62.4822	68.4853	65.3362	38.1066		70.4787	0.196371	0.293296	-0.669531	0.503157	0.948984
APBB1IP	0.254998	0	0	0	0	0	0.259483	0		0	0	0	4.91674	0	0	0	0		0.339451	2.20866	6.0972	-0.362242	0.717171	NA
APBB2	72.9293	88.5236	73.0479	56.0352	69.8307	61.9515	50.5992	52.0225		85.4486	80.2858	76.971	116.363	72.0948	65.3	90.7447	58.892		73.19	0.0147909	0.289748	-0.0510474	0.959288	0.999344
APBB3	1.78498	1.7106	2.49736	1.1207	3.03612	2.11198	2.59483	2.47726		13.0031	12.3517	26.4588	11.4724	12.0158	11.1488	29.0383	15.5891		9.27573	0.391184	0.738437	-0.529747	0.596288	NA
APC	64.5144	82.9641	83.0373	78.4492	91.0835	66.8795	85.6294	71.8406		234.055	226.447	127.483	195.031	300.395	264.385	183.304	306.585		153.88	-0.376811	0.266478	1.41404	0.157349	0.796822
APC2	2.29498	2.13825	3.74604	6.72422	0	0.703994	0.778449	1.65151		18.5758	20.5861	36.0802	19.667	7.20948	9.55609	12.7043	3.46424		9.11753	-0.695436	0.900542	0.772241	0.439972	NA
APCDD1	24.9898	17.106	15.6085	15.6898	5.3132	11.2639	3.1138	6.60603		61.3001	41.1722	67.3496	63.9176	33.6442	25.4829	36.2979	31.1781		28.7521	-0.751045	0.46289	1.62251	0.104694	NA
APCDD1L	7.39493	5.55945	12.4868	10.0863	3.79515	4.22397	3.37328	4.95453		9.28789	10.2931	16.8374	4.91674	7.20948	4.77805	5.44468	1.73212		7.02337	-0.0284886	0.786581	0.0362183	0.971108	NA
APEH	423.041	381.892	548.796	491.428	474.393	483.644	483.676	545.824		351.082	384.96	365.612	345.811	389.312	328.093	355.719	327.37		417.541	0.160617	0.176317	-0.910952	0.362321	0.927226
APELA	59.4144	53.8839	28.7197	26.8969	31.1202	52.7996	32.9543	21.4696		26.0061	12.3517	7.21603	11.4724	7.20948	6.37073	7.25957	17.3212		25.1541	0.289501	0.617403	-0.468901	0.639141	NA
APEX1	756.068	800.561	684.902	764.32	937.401	812.41	840.984	860.436		700.307	652.579	560.445	583.453	730.561	697.595	633.398	625.294		727.545	0.0956806	0.138653	-0.690072	0.490149	0.948237
APEX2	75.7343	77.8323	64.3071	71.1647	88.0474	98.5592	81.2182	61.9316		91.0214	80.2858	69.755	93.418	103.336	119.451	98.0042	71.0168		84.0677	-0.0296526	0.263016	0.11274	0.910236	0.997922
APH1A	107.354	86.3854	59.3124	80.1303	97.1557	150.655	73.6932	109		115.17	92.6375	96.2138	132.752	144.19	111.488	159.711	98.7307		107.161	0.127523	0.328612	-0.388065	0.697968	0.978793
APH1B	44.8796	35.9226	32.4657	36.4229	35.6744	30.9758	20.2397	28.0756		14.8606	12.3517	26.4588	19.667	24.0316	12.7415	10.8894	3.46424		24.3201	0.155983	0.49854	-0.312879	0.754373	NA
API5	385.301	491.798	367.112	381.6	348.394	281.598	355.751	272.499		237.77	271.737	199.644	250.754	225.897	199.085	183.304	197.461		290.607	-0.103639	0.205103	0.505302	0.613347	0.967156
APIP	52.2745	58.1604	44.9525	49.311	62.9994	58.4315	54.7509	28.9014		29.7213	26.7619	19.2428	42.6117	12.0158	31.8536	27.2234	31.1781		39.3994	0.209878	0.407249	-0.515356	0.606304	0.966302
APLF	9.17991	10.6913	6.86775	12.8881	5.3132	4.22397	5.96811	6.60603		3.71516	10.2931	4.81069	11.4724	2.40316	3.18536	3.62979	5.19635		6.65277	0.244013	0.807327	-0.302248	0.762463	NA
APLN	0.254998	2.13825	1.87302	1.68106	1.51806	2.11198	1.29741	0		0	0	2.40534	0	0	0	0	0		0.830008	0.603584	2.09077	-0.28869	0.772818	NA
APLNR	1.27499	3.4212	20.6032	11.7674	0.759029	0.703994	4.41121	5.78028		13.0031	2.05861	0	14.7502	0	1.59268	3.62979	0		5.23473	0.889974	1.4649	-0.607531	0.543498	NA
APLP1	31.1097	24.3761	31.8414	34.7418	17.4577	24.6398	19.2017	22.2954		33.4364	39.1136	57.7283	42.6117	28.8379	17.5195	19.9638	15.5891		28.779	0.544957	0.391761	-1.39104	0.164212	NA
APLP2	1431.05	1477.1	1594.57	1798.17	1329.82	1284.09	1567.02	1409.56		861.916	895.495	928.463	875.179	802.656	844.122	778.589	774.257		1165.75	-0.0168736	0.139199	0.12122	0.903517	0.997922
APMAP	172.633	168.067	179.81	177.071	229.227	217.534	233.016	207.264		81.7335	125.575	105.835	98.3348	120.158	122.637	110.708	112.588		153.887	0.164895	0.195456	-0.843641	0.39887	0.936154
APOA1	6.11994	5.55945	15.6085	22.9744	1.51806	1.40799	3.89224	4.12877		0	2.05861	31.2695	14.7502	2.40316	4.77805	1.81489	1.73212		7.50099	-0.0367134	1.13557	0.0323304	0.974209	NA
APOA2	2.29498	2.99355	6.24341	5.04317	1.51806	1.40799	1.81638	3.30302		0	0	0	1.63891	0	0	0	0		1.64122	-0.229389	1.74877	0.131171	0.89564	NA
APOA4	0.509995	0	0	0.560352	0	0	0	0		0	0	4.81069	1.63891	0	0	0	0		0.469997	0.78366	3.10584	-0.252318	0.800795	NA
APOB	4.33496	4.2765	8.11643	4.48281	3.03612	1.40799	4.41121	6.60603		14.8606	8.23444	2.40534	22.9448	24.0316	35.039	9.07447	13.8569		10.445	-1.11017	0.732534	1.51552	0.129641	NA
APOBEC2	0	0	0.624341	0	0	0	0.259483	0		1.85758	2.05861	0	1.63891	2.40316	1.59268	1.81489	1.73212		0.873861	-0.01207	2.17624	0.00554628	0.995575	NA
APOBEC3B	12.2399	10.2636	23.7249	17.9313	4.55417	2.81598	3.89224	1.65151		7.43031	4.11722	14.4321	8.19456	0	3.18536	3.62979	1.73212		7.48719	-0.362127	0.937655	0.386205	0.699345	NA
APOBEC3C	45.6446	40.1991	44.9525	44.8281	40.9876	28.1598	35.5492	32.2044		33.4364	22.6447	36.0802	44.2506	26.4348	23.8902	29.0383	43.3029		35.7252	-0.19369	0.35281	0.548993	0.58301	0.964079
APOBEC3F	6.88494	5.1318	9.98945	11.207	5.3132	7.03994	8.82242	7.43179		3.71516	2.05861	4.81069	4.91674	2.40316	4.77805	5.44468	1.73212		5.72999	-0.061533	0.902577	0.0681748	0.945646	NA
APOBEC3G	0.764993	1.28295	3.74604	3.36211	0.759029	0	2.59483	3.30302		1.85758	0	4.81069	1.63891	0	1.59268	0	0		1.60705	1.47948	1.7232	-0.85857	0.390578	NA
APOBR	0.254998	0	0	0.560352	0	0	0	0.825754		0	0	0	0	2.40316	1.59268	1.81489	0		0.46574	-2.15112	2.72854	0.78838	0.430475	NA
APOC1	65.7894	71.8452	69.9262	57.7162	50.0959	60.5435	56.5673	33.8559		20.4334	12.3517	7.21603	24.5837	12.0158	12.7415	7.25957	15.5891		36.1581	0.112489	0.466205	-0.241287	0.809332	0.992784
APOE	1401.72	1126.86	1728.8	1519.67	1370.05	1329.14	1169.75	1398		1562.22	1414.27	1842.49	1219.35	1071.81	912.607	1243.2	855.666		1322.85	0.43031	0.215028	-2.00118	0.0453732	0.560044
APOL2	29.0697	35.0673	36.2118	36.9832	19.7348	18.3039	25.6888	27.2499		14.8606	16.4689	26.4588	18.028	14.419	14.3341	14.5191	17.3212		22.7949	-0.271391	0.449282	0.604056	0.545807	NA
APOLD1	0.254998	0	0	1.1207	0	1.40799	0.518966	0.825754		1.85758	0	0	1.63891	0	0	1.81489	0		0.589987	1.81815	2.38141	-0.763475	0.44518	NA
APOM	4.84495	4.70415	1.87302	0.560352	2.27709	3.51997	1.5569	1.65151		0	0	0	0	2.40316	1.59268	0	0		1.56149	-1.84942	1.79686	1.02925	0.303364	NA
APOO	121.634	132.999	95.5241	100.303	140.42	115.455	114.691	115.606		27.8637	32.9378	26.4588	34.4172	19.2253	47.7805	23.5936	45.0351		74.6215	-0.0922609	0.334939	0.275456	0.782966	0.992559
APOOL	24.4798	16.6784	23.7249	21.8537	44.7827	38.0157	47.2259	37.9847		7.43031	2.05861	0	13.1113	14.419	9.55609	12.7043	12.1248		20.3844	0.0242659	0.581578	-0.0417242	0.966719	NA
APP	2456.9	2593.7	3124.2	3339.14	2749.96	2726.57	3400.52	3175.85		1417.33	1531.61	1549.04	1552.05	1564.46	1562.42	1649.74	1616.07		2250.6	-0.0125087	0.156326	0.0800169	0.936224	0.999344
APPBP2	26.0098	35.495	36.2118	29.6986	28.8431	18.3039	28.5431	26.4241		13.0031	28.8205	14.4321	24.5837	14.419	22.2976	18.1489	24.2496		24.3427	-0.27438	0.437284	0.627463	0.530356	NA
APPL1	77.7743	96.2213	101.143	109.829	163.95	126.719	154.133	129.643		46.4395	67.9341	55.3229	85.2235	122.561	95.5609	61.7064	105.659		99.9888	0.0175515	0.288179	-0.0609047	0.951435	0.999344
APPL2	36.4647	45.7586	30.5927	40.3453	16.6986	19.0078	12.1957	13.2121		29.7213	39.1136	33.6748	42.6117	14.419	17.5195	16.334	22.5175		26.8867	-0.341325	0.415323	0.821829	0.411174	NA
APRT	350.367	239.484	272.213	253.279	357.503	435.069	257.148	408.748		226.625	226.447	216.481	201.586	223.494	229.346	228.677	193.997		270.029	0.369713	0.241043	-1.5338	0.125078	0.755719
APTX	70.8893	78.26	36.8361	47.6299	84.2522	82.3673	74.7311	61.1058		52.0122	41.1722	19.2428	50.8063	57.6758	52.5585	36.2979	53.6956		56.2208	0.0992229	0.380098	-0.261045	0.794057	0.992559
AQP11	3.05997	3.84885	4.37039	1.1207	2.27709	5.63195	1.29741	0		3.71516	10.2931	7.21603	4.91674	2.40316	4.77805	1.81489	3.46424		3.76298	0.524092	1.06919	-0.490178	0.624008	NA
AQP3	4.58996	2.13825	2.49736	1.68106	3.03612	2.11198	4.41121	1.65151		5.57274	6.17583	0	3.27783	2.40316	6.37073	5.44468	1.73212		3.31841	-0.011877	1.05263	0.0112832	0.990998	NA
AQP4	1.01999	0	2.49736	1.1207	0	0.703994	0.778449	0		0	0	2.40534	3.27783	2.40316	1.59268	1.81489	1.73212		1.20916	-1.62865	1.81613	0.896769	0.369842	NA
AQP5	1.78498	0.42765	1.87302	1.1207	0	1.40799	0	0.825754		0	4.11722	7.21603	3.27783	0	1.59268	0	0		1.47774	1.12917	1.83254	-0.616177	0.537778	NA
AQR	309.312	372.483	424.552	449.402	342.322	260.478	402.199	351.771		261.919	341.729	305.479	313.032	264.348	316.944	255.9	311.781		330.228	-0.105399	0.220893	0.47715	0.633255	0.971858
AR	16.5748	20.9549	29.9684	18.4916	24.2889	25.3438	21.2776	18.1666		52.0122	57.6411	38.4855	47.5285	26.4348	31.8536	29.0383	29.446		30.4692	0.823688	0.374752	-2.19796	0.0279522	NA
ARAF	59.6694	48.7521	46.2012	44.2678	44.0237	49.9836	42.2957	48.7195		46.4395	90.5789	93.8084	60.6398	69.6916	81.2268	99.8191	64.0884		61.8878	-0.267493	0.298931	0.894832	0.370877	0.930638
ARAP1	119.084	98.3596	129.239	129.441	151.806	151.359	134.931	151.939		206.191	166.747	271.804	162.252	211.478	207.049	277.679	185.337		172.168	0.169194	0.232467	-0.727821	0.466723	0.944205
ARAP2	1.01999	1.7106	0.624341	1.1207	0	0.703994	0.259483	0		3.71516	0	0	0	2.40316	0	1.81489	0		0.83577	-2.01686	2.13741	0.943601	0.345373	NA
ARAP3	123.164	93.2278	181.683	159.7	81.9751	88.7033	104.312	104.871		254.488	199.685	269.399	214.698	170.624	160.861	210.528	178.408		162.27	-0.162879	0.267246	0.609472	0.542211	0.954886
ARC	7.64993	6.41475	15.6085	11.7674	6.83126	9.15193	9.60087	23.1211		13.0031	8.23444	40.8908	16.3891	7.20948	3.18536	7.25957	5.19635		11.9696	2.01309	0.755688	-2.66391	0.00772377	NA
ARCN1	396.776	510.614	428.922	500.394	527.525	433.661	545.433	466.551		196.903	189.392	161.158	213.059	213.881	230.939	181.489	278.871		342.223	-0.140099	0.205688	0.681128	0.495791	0.948237
AREL1	33.1497	32.0738	19.9789	19.6123	31.1202	15.4879	21.2776	24.7726		81.7335	84.403	67.3496	75.39	91.3201	92.3756	112.523	102.195		56.5477	-0.601294	0.322293	1.86568	0.0620868	0.624074
ARF1	647.439	589.302	597.494	557.55	697.548	742.714	617.829	755.565		325.076	282.03	334.343	244.198	295.589	339.241	348.46	311.781		480.385	0.0910978	0.165496	-0.550452	0.58201	0.964079
ARF3	152.744	147.967	121.122	138.407	155.601	158.399	115.21	134.598		61.3001	65.8755	60.1336	57.3619	60.079	71.6707	45.3723	55.4278		100.079	0.0582688	0.268406	-0.217092	0.828137	0.9931
ARF4	363.627	361.792	265.345	290.823	396.972	315.389	356.011	277.453		85.4486	78.2272	52.9176	93.418	74.498	81.2268	94.3745	98.7307		205.391	-0.0873232	0.259981	0.335883	0.736959	0.98619
ARF5	281.007	260.011	187.302	226.382	264.901	373.821	216.928	241.12		141.176	94.6961	105.835	98.3348	105.739	116.266	105.264	103.927		182.669	0.221348	0.277365	-0.798037	0.424849	0.941795
ARF6	172.888	169.777	154.212	168.106	231.504	200.638	228.864	257.635		117.027	131.751	134.699	96.6958	156.205	144.934	166.97	173.212		169.07	0.0288268	0.195529	-0.14743	0.882793	0.997376
ARFGAP1	79.3043	67.9964	81.1643	85.1735	88.0474	87.2953	99.6415	91.6587		91.0214	53.5239	67.3496	73.7511	79.3043	89.1902	61.7064	53.6956		78.114	0.25711	0.261955	-0.981506	0.326344	0.921298
ARFGAP2	124.694	111.189	103.016	107.588	138.143	135.167	137.526	127.166		104.024	67.9341	105.835	83.5845	112.949	89.1902	78.0404	69.2847		105.958	0.325298	0.232929	-1.39655	0.162549	0.803368
ARFGAP3	43.6046	53.8839	73.6722	65.5612	44.7827	48.5756	48.2638	47.068		18.5758	14.4103	24.0534	31.1393	16.8221	17.5195	23.5936	22.5175		37.1277	-0.164808	0.408683	0.403267	0.686752	0.978781
ARFGEF1	292.482	361.792	436.414	413.54	377.237	310.462	452.019	324.521		393.807	409.663	348.775	445.784	377.296	452.322	444.649	552.546		399.582	-0.223634	0.224157	0.997667	0.318441	0.917715
ARFGEF2	63.4944	68.424	64.3071	54.3541	91.8425	85.8873	107.426	91.6587		124.458	142.044	134.699	126.196	218.688	229.346	235.936	211.318		128.13	-0.167006	0.201028	0.830757	0.406111	0.938864
ARFGEF3	85.4242	79.9706	117.376	112.07	95.6377	86.5913	86.6673	98.2648		131.888	162.63	214.076	181.919	194.656	191.122	196.008	168.015		137.645	-0.222308	0.23258	0.955833	0.339157	0.925795
ARFIP1	114.494	137.276	93.0268	111.51	98.6738	70.3994	108.464	81.7497		31.5788	41.1722	19.2428	32.7783	21.6284	46.1878	23.5936	38.1066		66.8676	-0.409889	0.358616	1.14297	0.253049	0.884971
ARFIP2	110.159	115.893	59.9367	64.4404	145.734	136.575	86.1483	94.136		91.0214	76.1686	62.5389	67.1954	103.336	90.7829	92.5596	69.2847		91.6193	0.130417	0.351642	-0.370881	0.710726	0.981352
ARFRP1	24.4798	14.9678	21.2276	22.9744	18.9757	35.9037	35.0302	35.5074		18.5758	26.7619	26.4588	9.83348	19.2253	19.1122	29.0383	19.0533		23.5704	0.463163	0.466479	-0.992892	0.320762	NA
ARG1	0	0	0.624341	0	0.759029	0	1.5569	0		0	0	0	0	0	1.59268	0	0		0.283309	1.55072	3.5889	-0.432089	0.665677	NA
ARG2	136.934	126.584	112.381	118.234	111.577	111.231	101.717	91.6587		115.17	111.165	64.9443	109.807	69.6916	79.6341	65.3362	57.1599		98.9516	0.322874	0.244178	-1.32229	0.186073	0.838065
ARGLU1	137.954	132.572	116.127	114.312	128.276	171.071	140.899	145.333		235.912	265.561	228.508	308.116	264.348	202.271	183.304	214.783		186.834	0.49661	0.204814	-2.42469	0.0153215	0.351125
ARHGAP1	156.059	161.652	147.969	140.088	226.95	179.519	195.391	216.348		70.588	51.4653	55.3229	75.39	81.7074	71.6707	85.3	65.8205		123.827	0.18568	0.237452	-0.781967	0.434234	0.941866
ARHGAP10	11.4749	5.55945	20.6032	20.733	13.6625	9.85592	10.6388	10.7348		13.0031	10.2931	9.62138	18.028	12.0158	7.96341	9.07447	10.3927		12.1034	0.0669807	0.648441	-0.103295	0.917729	NA
[truncated: 13,690 more rows]
