# Supplementary material for: DAP5 drives translation of specific mRNA targets with upstream ORFs in human embryonic stem cells
Source: RNA. 2022 Oct;28(10):1325–36. doi: 10.1261/rna.079194.122 (PMC9479741; doi:10.1261/rna.079194.122)
Supplement: Supplemental Material [file supp_079194.122_Supplemental_Table_S2.xlsx]

## Sheet: reduced abundance p<0.05
Gene Name	p-value	Ratio shDAP5/shNT	Fold-change
Sumo2	0.0156671	0.0561173	17.8198
UBE2D1	0.0012578	0.0628226	15.9178
TM7SF2	0.000708307	0.0661025	15.128
LZIC	0.0119075	0.0864927	11.5617
FBP1	0.00147944	0.104723	9.54897
CARD11	0.0231118	0.118918	8.40913
TMSB15B	0.0355772	0.140725	7.10608
PTP4A2	0.0302544	0.142442	7.02042
HMGA2	0.0247602	0.148795	6.72066
KATNBL1	0.00606819	0.150331	6.65199
ZNF516	0.00482326	0.165872	6.02875
MSI1	0.000139063	0.167739	5.96164
SLFN13	0.000175522	0.17358	5.76104
LAMA1	0.0217398	0.173826	5.75289
HMGN2	0.0144109	0.177109	5.64624
SIX3	0.00235029	0.178494	5.60243
DPYSL5	0.0267519	0.185991	5.37662
ATR	3.03834e-05	0.190609	5.24635
USP3	5.00408e-05	0.195314	5.11997
HSPG2	0.0126794	0.199346	5.01641
Khdrbs2	0.00527757	0.200934	4.97676
CEP350	0.00220526	0.207149	4.82745
COL14A1	0.0440762	0.207197	4.82633
NR6A1	0.000420661	0.2158	4.63393
AGAP1	0.0317456	0.229305	4.361
GNG12	0.00386941	0.236861	4.22188
SLC52A3	0.000503181	0.238976	4.18452
KBTBD11	0.00473856	0.241651	4.13819
GDPD1	0.00792638	0.243076	4.11395
FGFBP3	0.00390388	0.247507	4.04029
GPR50	0.013023	0.248039	4.03163
TRPM7	0.000465393	0.252169	3.9656
PKP4	0.0139623	0.253726	3.94126
CCNY	0.0193932	0.261098	3.82998
FNDC3A	0.001807	0.267071	3.74433
SHANK2	0.0222189	0.270206	3.70088
WNK2	0.00776784	0.278803	3.58676
ADAMTS19	0.00106392	0.281652	3.55048
Tusc3	0.000903234	0.281863	3.54782
EIF4G2	1.525e-06	0.283783	3.52382
FBN2	0.0298661	0.289117	3.45881
IMPA1	8.02967e-05	0.292378	3.42023
PGAP1	0.0199849	0.294317	3.39769
EMC9	0.00509411	0.296494	3.37275
SALL1	0.000288468	0.30746	3.25245
ELMO1	0.0155596	0.30854	3.24107
BOK	0.0487473	0.311033	3.21509
ASS1	0.0473889	0.311037	3.21506
PSMC3IP	0.0498813	0.318712	3.13763
GPBP1L1	0.0368	0.318946	3.13533
CDK6	0.00347771	0.326414	3.06359
LAMC3	0.0406293	0.327402	3.05435
IMPDH1	0.0142319	0.327692	3.05165
USP25	0.00873813	0.328617	3.04305
H2afy2	2.13325e-05	0.328754	3.04179
FKBP7	0.0348543	0.328777	3.04157
INPP5A	0.0166169	0.329193	3.03773
CHST6	0.000695771	0.330123	3.02917
DOT1L	0.0313729	0.333649	2.99716
Nova1	0.00461934	0.334288	2.99143
EFNB1	0.000208873	0.334889	2.98606
TBL2	0.00371816	0.339471	2.94576
COLGALT1	0.0117166	0.340188	2.93955
NRP2	0.0364134	0.340454	2.93726
TMEM109	0.0129197	0.340511	2.93676
MAD2L1BP	0.026454	0.343451	2.91163
TMEM35	0.0321651	0.344923	2.8992
CCDC88A	0.00176118	0.352524	2.83668
ANKMY2	0.00964011	0.353452	2.82924
TMEM55A	0.012107	0.35509	2.81619
DCBLD2	0.0114594	0.355264	2.81481
MKL2	0.0365815	0.355501	2.81293
RNF169	0.0363544	0.356426	2.80563
NME4	0.00234779	0.357886	2.79418
NBEA	0.0071432	0.360399	2.7747
FANCL	0.0187328	0.362573	2.75806
SLC6A8	0.00147668	0.362782	2.75648
Zic2	0.00163874	0.364426	2.74404
FLG	0.0360289	0.364735	2.74171
COMMD8	0.0383316	0.366071	2.73171
ZNF678	0.0207523	0.366756	2.72661
ANKRD32	0.0122625	0.367142	2.72374
KIAA1161	0.0128028	0.369423	2.70692
SLC25A21	0.000540317	0.369481	2.7065
CHSY1	0.0111973	0.370352	2.70013
UBE2J1	0.025925	0.371234	2.69372
TBL1X	0.0470156	0.375818	2.66086
SOX3	0.0279547	0.376762	2.6542
STAG1	6.58537e-06	0.377067	2.65205
UBN2	0.00445111	0.380606	2.62739
LEPREL2	0.00120481	0.385636	2.59312
NANOGP8	0.0220836	0.392337	2.54883
BBX	0.0172308	0.392612	2.54705
NELL2	0.00353689	0.392802	2.54581
UXT	0.0462694	0.396384	2.5228
CLGN	0.00340726	0.396491	2.52212
TTC38	0.010011	0.397161	2.51787
ACADSB	0.0031508	0.397985	2.51266
ZNF518B	0.0421641	0.399449	2.50345
H1-2	0.0416741	0.404773	2.47052
MAL2	0.016948	0.406007	2.46301
Wbscr17	0.0481456	0.406419	2.46052
LMO7	0.0143118	0.406833	2.45801
EPB41L3	0.000254652	0.408865	2.44579
TOMM6	0.0498693	0.411534	2.42993
PGBD5	0.025955	0.412158	2.42626
DERA	0.000434318	0.418459	2.38972
SEL1L3	0.000485315	0.422882	2.36473
PHF21A	0.0494182	0.423398	2.36184
INPP4A	0.0185579	0.42466	2.35482
ERBB2	1.84321e-06	0.424897	2.35351
DSE	0.032205	0.425226	2.35169
H1-4	0.0178291	0.425838	2.34831
RNF126	0.0190689	0.429385	2.32891
MARCKS	0.00289554	0.430983	2.32028
GALNT3	0.0124803	0.431856	2.31559
ZIC5	0.00649384	0.432552	2.31186
PIR	0.00624842	0.43343	2.30718
Camk2d	0.0197057	0.436574	2.29056
Ppp1r3b	0.00922358	0.437137	2.28761
UGT8	0.0036688	0.437862	2.28382
CBLL1	0.0147045	0.43806	2.28279
GRIP1	0.00529613	0.438685	2.27954
SUFU	0.00552904	0.439006	2.27787
Ap2s1	0.0425258	0.43922	2.27676
AMER1	0.00685338	0.442861	2.25804
BCL7C	0.0265104	0.443352	2.25554
SLC6A15	0.000877727	0.444863	2.24788
GABRA5	0.0397514	0.445057	2.2469
MCM8	0.0284308	0.445309	2.24563
IGHG1	0.0265281	0.448506	2.22963
PDE3B	0.0116862	0.449714	2.22364
Rap2a	0.0193767	0.450997	2.21731
ARHGAP42	0.0277877	0.454814	2.1987
OSGEPL1	0.0289474	0.456533	2.19042
FAM122B	0.0468339	0.457644	2.1851
URI1	1.64518e-05	0.457955	2.18362
FAM171A2	0.00470911	0.458391	2.18155
CLYBL	0.0423092	0.458759	2.1798
Csnk1g2	0.00332225	0.459807	2.17483
SMIM8	0.0452954	0.460164	2.17314
CTC1	0.00624531	0.462465	2.16233
MPRIP	0.00501477	0.462892	2.16033
IMPA2	0.00155384	0.463283	2.15851
SFT2D3	0.0112214	0.465015	2.15047
LEPREL4	0.0254158	0.465255	2.14936
MAP7D1	0.0387788	0.465884	2.14646
ZNF219	0.00248014	0.466032	2.14578
ARHGAP32	0.0209321	0.467768	2.13781
ZBED1	0.0131209	0.468436	2.13476
KDM5A	0.045172	0.471735	2.11983
FGFR1	0.00244647	0.472333	2.11715
PRDM15	0.0462942	0.474467	2.10763
CHPF2	0.0184864	0.475175	2.10449
H1FX	1.16816e-05	0.475613	2.10255
Tnfaip8	0.0406548	0.4758	2.10172
ARHGEF40	7.52004e-06	0.475861	2.10146
HIC2	0.00422628	0.476132	2.10026
Cadm4	0.0306936	0.477249	2.09534
KIF21B	0.0402951	0.477581	2.09389
KIAA0101	0.0460177	0.479314	2.08631
PGRMC1	0.047516	0.479652	2.08485
TNFRSF8	0.0342366	0.480368	2.08174
HSD11B2	0.00048179	0.480647	2.08053
ZNF92	0.0433377	0.481849	2.07534
Rnd3	0.0490281	0.482659	2.07186
FAM20B	0.0112766	0.485456	2.05992
TANC1	0.0476701	0.485786	2.05852
ASNS	0.000595678	0.486148	2.05699
BIN3	0.000168206	0.486437	2.05576
INPPL1	0.000947603	0.486618	2.055
SNTB1	0.00852056	0.48836	2.04767
BRD1	0.00659874	0.488423	2.04741
IGDCC3	0.0290718	0.488543	2.0469
TOP2B	0.00173343	0.489595	2.0425
FREM2	0.00215522	0.493321	2.02708
H1-5	0.000459257	0.493576	2.02603
RHBDD1	0.00467427	0.493756	2.02529
PANK1	0.0204851	0.495712	2.0173
KIF21A	0.000119681	0.496704	2.01327
C16orf59	0.0113868	0.497063	2.01182
TTC28	0.00108388	0.49746	2.01021
TMEM132B	0.000231138	0.498965	2.00415
NUCKS1	0.00108579	0.501151	1.99541
PMM2	0.0156936	0.50258	1.98973
DHRS7	0.00247838	0.504781	1.98106
PTPN9	0.0211323	0.505443	1.97846
PLCH1	0.0023625	0.506881	1.97285
CHDH	0.0449675	0.507834	1.96915
ESCO2	0.0203522	0.508466	1.9667
ALKBH5	0.000186889	0.508891	1.96506
CBR4	0.00512808	0.509063	1.96439
RCN1	0.00334321	0.509669	1.96206
ZNF280C	0.00071264	0.510978	1.95703
ALDH3A2	5.73916e-05	0.511433	1.95529
PCK2	0.00831253	0.512304	1.95197
KCTD15	0.0174868	0.513105	1.94892
SPTBN2	0.00209808	0.514981	1.94182
SALL3	0.00369093	0.515142	1.94121
TLCD1	0.0290802	0.516202	1.93723
ISOC1	0.00355959	0.51881	1.92749
ARID1A	0.000284627	0.519925	1.92335
VHL	0.0487544	0.520223	1.92225
LAPTM4B	0.00740594	0.520997	1.9194
PBXIP1	0.00159758	0.521992	1.91574
ATAD2B	0.000671702	0.524184	1.90773
Znf771	0.00343904	0.52425	1.90749
CHD7	8.50439e-06	0.52595	1.90132
PDZD8	0.0151494	0.527001	1.89753
PTPN13	0.00023066	0.52745	1.89591
LAMB1	0.0282105	0.528282	1.89293
STT3B	0.0202188	0.52882	1.891
CCDC71L	0.00693903	0.528887	1.89076
WHSC1L1	0.00421736	0.530726	1.88421
C3orf58	0.0111285	0.532002	1.87969
MARK3	0.00958636	0.532243	1.87884
PAK1	0.0177159	0.532283	1.8787
PTPRJ	0.00401109	0.532628	1.87748
GYLTL1B	0.035866	0.53271	1.87719
SH3GL3	0.0308607	0.534954	1.86932
UACA	0.00114894	0.53539	1.8678
ZHX2	0.00208899	0.535414	1.86771
ALDH6A1	0.0270806	0.537343	1.86101
PRDM5	0.0451544	0.541495	1.84674
CABIN1	0.00230025	0.541692	1.84607
GATAD2B	0.000861001	0.545074	1.83461
ZCRB1	5.10313e-05	0.547639	1.82602
AHDC1	0.00246584	0.547889	1.82519
GALC	0.0281776	0.547896	1.82516
ROCK1	3.65159e-05	0.548133	1.82437
RARRES2	0.0221271	0.548364	1.82361
DGKE	0.00344568	0.548547	1.823
WDR24	0.046743	0.549163	1.82095
PHGDH	0.0172925	0.550678	1.81594
FGF13	0.0040294	0.552735	1.80919
HEPH	0.0381657	0.553457	1.80682
GALNT12	0.0167958	0.553796	1.80572
GNAO1	0.0279491	0.553797	1.80571
DXO	0.0334529	0.554717	1.80272
FAH	0.0354602	0.55538	1.80057
ARHGAP26	0.0332331	0.557484	1.79377
CORO2B	0.000127528	0.558693	1.78989
GCA	0.00465109	0.558742	1.78973
VAT1L	0.0440518	0.559491	1.78734
HOMER1	0.00567839	0.559955	1.78586
TYRO3	0.00149036	0.561071	1.78231
PEA15	0.00356558	0.561601	1.78062
SBF1	0.00159748	0.563208	1.77554
ERBB2IP	0.0083708	0.563251	1.77541
NADK2	1.24862e-05	0.56426	1.77223
DHRS4	0.0209267	0.564845	1.7704
ZBED5	0.00235266	0.565456	1.76848
UST	0.00088834	0.565985	1.76683
ERH	0.0320223	0.566275	1.76593
ZFYVE27	0.0266214	0.567268	1.76284
ECI2	0.000299338	0.567547	1.76197
PXYLP1	0.00951195	0.568934	1.75767
PRKCA	0.00308721	0.568984	1.75752
TFAP4	0.00806967	0.57359	1.74341
BCAT1	0.00185743	0.574957	1.73926
EMB	0.00063312	0.576559	1.73443
POU2F1	0.0232703	0.576607	1.73428
DCX	0.040982	0.57689	1.73343
TBC1D4	0.0387199	0.577263	1.73231
OTUD4	0.0408607	0.577399	1.7319
KMT2D	0.0120412	0.577732	1.73091
ITPR2	0.0009345	0.577799	1.7307
RAB11FIP4	0.0313561	0.579958	1.72426
CENPC	0.00762801	0.58041	1.72292
RNF219	0.0431064	0.581559	1.71952
AS3MT	0.0137944	0.581975	1.71829
UBP1	0.0133851	0.583708	1.71318
ADNP	0.000665975	0.584286	1.71149
SEPT5	8.60444e-05	0.584379	1.71122
MAP3K4	0.00145615	0.585157	1.70894
STON2	0.044893	0.585695	1.70737
LHFPL2	0.0288252	0.586623	1.70467
SMCHD1	0.000465248	0.58771	1.70152
TRIM71	0.00115111	0.588991	1.69782
LIN54	0.0362885	0.590377	1.69383
ANKRD11	0.0103089	0.590636	1.69309
MTX3	0.00480966	0.591341	1.69107
DAB1	0.0405163	0.591918	1.68942
SLC44A1	0.000194254	0.592058	1.68902
ZNF607	0.0157087	0.592441	1.68793
AGPAT4	0.0223478	0.593755	1.6842
TIMELESS	0.0159295	0.594797	1.68125
ABI2	0.000455456	0.595571	1.67906
BRWD3	0.0344819	0.596716	1.67584
SAMD1	0.018248	0.597622	1.6733
CXXC1	0.00312706	0.598454	1.67097
SLC2A3	0.012208	0.599091	1.6692
SASS6	0.0430948	0.599361	1.66844
KDM6A	0.00287429	0.599482	1.66811
ZNF346	0.0115803	0.599866	1.66704
SLC12A7	0.0387086	0.600056	1.66651
FABP6	0.0292857	0.602035	1.66103
GCC1	0.0111348	0.602045	1.661
ZDHHC13	0.0248151	0.602747	1.65907
GPC1	0.00315354	0.603267	1.65764
PSPH	0.0427788	0.604332	1.65472
CSK	0.00372696	0.604402	1.65453
MCF2L	0.0298963	0.604498	1.65427
PGGT1B	0.00664076	0.606301	1.64935
FAM213A	0.000857287	0.608123	1.6444
ATAD2	0.0177904	0.608439	1.64355
TMEM68	0.00466776	0.608874	1.64238
ATF7	0.00684053	0.609471	1.64077
MTCL1	0.031742	0.610412	1.63824
IGSF3	0.00263836	0.611569	1.63514
SLC12A2	0.00223076	0.611573	1.63513
PARP16	0.015298	0.612163	1.63355
ARHGEF12	0.00161319	0.613351	1.63039
Frmd5	0.000352633	0.614166	1.62823
KIF18B	0.0377302	0.615283	1.62527
CENPU	0.0342663	0.617171	1.6203
Tpst1	0.0180241	0.617641	1.61906
GNAI1	0.0290992	0.618592	1.61658
KIAA0753	0.0435814	0.61908	1.6153
DAK	0.00755351	0.619363	1.61456
ATG7	0.0059004	0.61959	1.61397
TP53BP1	0.000319112	0.620355	1.61198
CLK4	0.0452227	0.620447	1.61174
MBTD1	0.00599403	0.621736	1.6084
LRIG2	0.0420718	0.622018	1.60767
GPD2	0.00392221	0.622457	1.60654
QSER1	0.00219673	0.622469	1.60651
MKI67	0.00187807	0.624074	1.60238
GOLM1	0.00797076	0.627971	1.59243
SALL2	0.000432979	0.628093	1.59212
Celf2	0.0388848	0.628283	1.59164
RABL6	0.0128841	0.628432	1.59126
PTGR2	0.0385675	0.628923	1.59002
ERAP1	0.01124	0.63086	1.58514
BTBD2	0.0305641	0.63162	1.58323
FAM8A1	0.048675	0.63203	1.5822
STXBP4	8.02055e-05	0.632375	1.58134
ACSS3	0.0263283	0.634107	1.57702
MYEF2	0.0431297	0.6348	1.5753
SLC27A3	0.0151211	0.63513	1.57448
MBOAT7	0.0164429	0.635879	1.57263
CADM1	0.0377408	0.636385	1.57138
PDK3	0.00508064	0.636481	1.57114
RTN4IP1	0.0174048	0.636932	1.57003
SPATS2	0.0131043	0.63727	1.56919
RUFY3	0.0305934	0.63796	1.5675
BLM	0.000430727	0.639079	1.56475
WHSC1	0.0199409	0.640077	1.56231
EFCAB14	0.01629	0.640329	1.5617
CHRAC1	0.0135878	0.641333	1.55925
Tmem65	0.0491573	0.64149	1.55887
FRAS1	0.000273118	0.642296	1.55691
SDC4	0.00769568	0.642323	1.55685
ACSL4	0.00546116	0.642486	1.55645
DNAJC10	0.000498711	0.643032	1.55513
TNS3	0.0370256	0.644387	1.55186
HPCAL1	0.0305249	0.645156	1.55001
RREB1	0.00596794	0.645494	1.5492
KIF14	0.00061062	0.646045	1.54788
ST6GAL1	0.0006502	0.646464	1.54688
ADAR	0.000255828	0.647201	1.54512
CLN3	0.0193647	0.647208	1.5451
L3MBTL3	0.00878127	0.647713	1.54389
ITGAV	0.00244333	0.649527	1.53958
REPS1	0.00314209	0.649586	1.53944
CANT1	0.000473112	0.650087	1.53826
SLC12A6	0.00934078	0.650112	1.5382
SLC29A2	0.0493491	0.65047	1.53735
HIRA	4.75999e-05	0.650762	1.53666
WNK1	0.00345402	0.651089	1.53589
MBD1	0.0260048	0.652064	1.53359
GRB10	0.0346691	0.654311	1.52833
CACNA2D2	0.0418013	0.654652	1.52753
DDAH2	0.0117254	0.654831	1.52711
AVEN	0.0342082	0.657509	1.52089
Lmo4	0.0194759	0.658577	1.51843
EMC8	0.00423886	0.659276	1.51681
PTPRA	0.0065782	0.661213	1.51237
MEX3A	0.00571804	0.661421	1.5119
MTA1	0.00102229	0.662266	1.50997
RBP1	0.00281362	0.663984	1.50606
PHF10	0.0202189	0.664375	1.50517
HMGN1	0.0429066	0.664385	1.50515
DPF2	0.00145372	0.66484	1.50412
BTD	0.003498	0.665304	1.50307
P4HA1	0.0140024	0.665925	1.50167
ETFB	0.00519405	0.666707	1.49991
CAMSAP1	0.009956	0.666857	1.49957
CCDC77	0.0172453	0.667441	1.49826
SPATS2L	0.0117752	0.667738	1.49759
TRAPPC9	0.0469385	0.668443	1.49601
MPHOSPH8	0.00891532	0.668495	1.4959
GPBP1	0.0296027	0.66898	1.49481
RPP25	0.0191927	0.670686	1.49101
C17orf59	0.00346061	0.670982	1.49035
UHRF2	0.000543323	0.671293	1.48966
TMEM159	0.0474639	0.671366	1.4895
RAB15	0.0332345	0.672128	1.48781
BCL9	0.0412431	0.672496	1.487
MOV10	0.00999625	0.672748	1.48644
BAZ1A	0.0192483	0.673606	1.48455
HADH	0.0139887	0.673671	1.4844
GSTO1	0.00392726	0.67384	1.48403
BRD8	0.00720347	0.674137	1.48338
NLGN4X	0.00382745	0.674214	1.48321
VTI1B	0.0345078	0.674262	1.4831
CDCA8	0.0049132	0.675242	1.48095
PTBP2	0.00258503	0.676848	1.47744
ARMC10	0.0140316	0.677515	1.47598
PBRM1	0.00276052	0.677833	1.47529
CENPO	0.0318771	0.67963	1.47139
NUMA1	0.0026704	0.679815	1.47099
DHDDS	0.0269559	0.680786	1.46889
LMBR1	0.00327314	0.68159	1.46716
SLC38A1	0.0147266	0.683305	1.46347
SLC44A2	0.0423463	0.683869	1.46227
CKAP4	0.00422316	0.684504	1.46091
LYPLA1	0.0174569	0.685055	1.45974
SORD	0.0103724	0.685533	1.45872
MPI	0.0475742	0.685573	1.45863
SELENBP1	0.00208815	0.685941	1.45785
CRABP2	0.00525675	0.685991	1.45774
PPP6R3	0.0347382	0.686285	1.45712
BAP18	0.000404347	0.687085	1.45542
CCNT2	0.0406864	0.687545	1.45445
TMEM201	0.0113872	0.687799	1.45391
RAB11FIP1	0.00176085	0.688992	1.4514
AGPAT1	0.0311712	0.689325	1.45069
KDELC1	0.000110907	0.689923	1.44944
STMN1	0.0146519	0.690957	1.44727
ERP44	0.0343259	0.691127	1.44691
HMGN5	0.00620652	0.691775	1.44556
PANX1	0.00539752	0.692012	1.44506
PTBP1	0.0436696	0.692305	1.44445
SCAF4	0.0042216	0.693115	1.44276
ASPH	0.0106786	0.693721	1.4415
NFXL1	0.0340001	0.69424	1.44042
ROBO1	0.00334037	0.69527	1.43829
ARID2	0.00247096	0.695604	1.4376
INCENP	0.00568666	0.697494	1.4337
HDHD2	0.0430744	0.697927	1.43281
MFSD10	0.0309521	0.697949	1.43277
FARP1	0.000540831	0.698541	1.43155
RBM23	0.00189638	0.698731	1.43116
PLXNA1	0.000201197	0.699453	1.42969
DICER1	0.00848098	0.699584	1.42942
ACTL6A	0.0385994	0.699903	1.42877
C10orf35	0.0270767	0.699981	1.42861
ZNF668	0.0221031	0.700979	1.42658
CDC42BPB	0.00311589	0.701165	1.4262
PRKAA1	0.0225209	0.701199	1.42613
PHIP	0.0309923	0.701595	1.42532
VIMP	0.0262633	0.702888	1.4227
ATAD5	0.0119252	0.705052	1.41834
ALG12	0.0323249	0.705127	1.41818
WNK3	0.00385424	0.705238	1.41796
CPNE2	0.0358717	0.706361	1.41571
GGCX	0.0220514	0.708809	1.41082
SMARCA4	0.0028993	0.70909	1.41026
DNAJC1	0.0256405	0.710895	1.40668
CLN5	0.0440941	0.711305	1.40587
TBC1D16	0.00552923	0.71152	1.40544
ARHGEF11	0.0334684	0.711856	1.40478
MLLT10	0.0336132	0.712068	1.40436
PSIP1	0.0214545	0.712189	1.40412
RDH14	0.000945254	0.7123	1.4039
PLXNB1	0.00367596	0.712624	1.40327
MTA2	0.00236906	0.712785	1.40295
Dad1	0.00994589	0.714807	1.39898
CMTM6	0.0267862	0.71488	1.39884
SRGAP2	0.00335176	0.714891	1.39881
PHF20	0.0283527	0.714927	1.39874
CTDSPL2	0.00466475	0.715296	1.39802
NUDT1	0.0499991	0.71629	1.39608
SDC3	0.0326821	0.717857	1.39303
SMARCC1	0.00187493	0.717904	1.39294
CCBL1	0.0291702	0.717917	1.39292
ZNF532	0.00353747	0.718087	1.39259
APOA1BP	0.0160938	0.718215	1.39234
MYO9B	0.00583748	0.718432	1.39192
NR2F6	0.0211048	0.71905	1.39072
PROSER1	0.00223289	0.720613	1.38771
ZNF24	0.0197714	0.721162	1.38665
SUCLG2	0.000272439	0.723286	1.38258
CDH2	0.0167742	0.72338	1.3824
EHMT2	0.00457005	0.723394	1.38237
GOLIM4	0.0112032	0.724012	1.38119
PDE5A	0.0289796	0.725415	1.37852
MECP2	0.00898653	0.725954	1.3775
MPP7	0.0405943	0.727031	1.37546
PBX2	0.0194412	0.727038	1.37544
BPTF	0.00258916	0.727041	1.37544
ENDOG	0.0439363	0.727209	1.37512
SGPL1	0.0120075	0.727262	1.37502
PPP2R1B	0.0191867	0.728199	1.37325
NUSAP1	0.00316973	0.729077	1.3716
ZADH2	0.017281	0.730415	1.36909
SV2A	0.0200135	0.73125	1.36752
Smarcb1	0.0198704	0.731498	1.36706
HIP1R	0.0353156	0.732723	1.36477
PYGL	0.00579963	0.733416	1.36348
SMARCE1	0.000527752	0.733652	1.36304
AAMDC	0.0267559	0.734318	1.36181
VPS4B	0.038458	0.73442	1.36162
MEMO1	0.0325747	0.73469	1.36112
EIF4G3	0.00730982	0.7353	1.35999
TET1	0.0447779	0.735361	1.35988
SCAP	0.0209204	0.735784	1.35909
MBD3	0.00861758	0.736138	1.35844
KRI1	0.0294297	0.736821	1.35718
NT5DC1	0.0250561	0.73697	1.35691
AKR7A2	0.00784526	0.737554	1.35583
NUP214	0.00127167	0.73758	1.35578
BCL7B	0.0391213	0.738285	1.35449
HP1BP3	0.0337538	0.738293	1.35448
THOP1	0.0493897	0.738711	1.35371
CDH1	0.000300552	0.738854	1.35345
MDC1	0.00850488	0.739779	1.35176
ZNF462	0.000462875	0.739957	1.35143
LRIG1	0.0116792	0.740408	1.35061
KIF11	0.0033725	0.742027	1.34766
UBQLN4	0.00196122	0.74269	1.34646
NUP88	0.0047945	0.743042	1.34582
MAP4K3	0.000766303	0.743284	1.34538
SIN3B	0.0260418	0.743415	1.34514
KPNA2	0.00432145	0.743906	1.34426
TMOD3	0.0261277	0.743937	1.3442
IPO4	0.0299583	0.743985	1.34411
RPRD1B	0.0260091	0.744423	1.34332
TXNDC5	0.00159076	0.74654	1.33951
MMTAG2	0.0253139	0.747946	1.337
NIPBL	0.0113453	0.748471	1.33606
SLC1A5	0.00383548	0.74852	1.33597
LIMA1	0.00339371	0.748555	1.33591
NCOR1	0.00997563	0.749316	1.33455
AP1S2	0.0423031	0.749417	1.33437
PLEKHA7	0.0413476	0.750703	1.33209
RAB23	0.0241239	0.750738	1.33202
SENP1	0.0162113	0.751052	1.33147
SCRIB	0.000136861	0.751885	1.32999
STIM1	0.0461957	0.752037	1.32972
IMPAD1	0.00402559	0.752253	1.32934
RALGAPA2	0.0491191	0.75237	1.32913
AURKB	0.0194585	0.753167	1.32773
SYNE2	0.00561995	0.753704	1.32678
TMEM209	0.00383616	0.754911	1.32466
RASA1	0.0162389	0.755342	1.3239
NCKAP1	0.000308801	0.756151	1.32249
DDX31	0.0219344	0.756962	1.32107
WIZ	0.0199377	0.756974	1.32105
TJP1	0.0119296	0.758779	1.31791
CHAF1A	0.0191053	0.759044	1.31745
FMNL2	0.0117566	0.760955	1.31414
SLC35E2B	0.0292902	0.761611	1.31301
USP22	0.0143075	0.762665	1.31119
CETN2	0.032702	0.762965	1.31068
CYFIP1	0.0237094	0.763214	1.31025
EPC1	0.0321671	0.764003	1.3089
UFSP2	6.12144e-05	0.764539	1.30798
VRK2	0.0347274	0.765043	1.30712
MORC2	0.000749114	0.7653	1.30668
TTC37	0.00182237	0.766663	1.30435
CHTOP	0.0404595	0.76806	1.30198
NEK9	0.0046622	0.771864	1.29557
RAP1GDS1	0.01506	0.77232	1.2948
FAM208A	0.0108577	0.77238	1.2947
SMARCD2	0.0321302	0.772621	1.2943
PDIA4	0.000490463	0.772664	1.29422
ZSCAN10	0.0259778	0.772795	1.294
KDM3B	0.000817049	0.772958	1.29373
HSD17B7	0.0085289	0.773482	1.29286
CBX2	0.00377092	0.773631	1.29261
TROVE2	0.0190076	0.774148	1.29174
DAB2IP	0.00830146	0.77448	1.29119
FLOT2	0.0353073	0.774724	1.29078
CPSF3	0.00550482	0.775631	1.28927
STAT5B	0.0459207	0.776808	1.28732
PPM1A	0.0381876	0.778174	1.28506
CHD4	0.0108329	0.780068	1.28194
PPP2R5E	0.0100092	0.780082	1.28192
NUP153	0.0332847	0.780231	1.28167
TCF20	0.00112936	0.780653	1.28098
AHCTF1	0.00678739	0.781019	1.28038
BRD3	0.00594687	0.781567	1.27948
IVNS1ABP	0.0147023	0.78205	1.27869
RRM1	0.0192586	0.782302	1.27828
IGF2BP2	0.00866336	0.782983	1.27717
LYN	0.0360947	0.783138	1.27691
SMARCD1	0.0131046	0.783171	1.27686
COL6A2	0.0308021	0.783305	1.27664
TBCD	0.0413015	0.783629	1.27611
KIAA1429	0.0238394	0.784256	1.27509
CIT	0.0165822	0.784417	1.27483
APRT	0.0155775	0.784536	1.27464
IRGQ	0.024132	0.784574	1.27458
EHMT1	0.00394177	0.785005	1.27388
UTRN	0.0361837	0.785228	1.27352
TPR	0.041677	0.785872	1.27247
LCHN	0.00381206	0.78592	1.27239
RPRD1A	0.00531691	0.786106	1.27209
EP400	0.0291456	0.786503	1.27145
SGSH	0.0374543	0.787753	1.26943
NDC1	0.00789144	0.787993	1.26905
KIF22	0.0362912	0.788286	1.26857
COA7	0.00288717	0.789494	1.26663
Pip4k2b	0.0198875	0.789813	1.26612
ITGB5	0.0113808	0.790014	1.2658
DPPA4	0.0187906	0.790567	1.26492
FAM117B	0.0352867	0.791298	1.26375
NNT	0.0413022	0.793075	1.26092
CHUK	0.0314055	0.793756	1.25983
CROCC	0.0454387	0.793806	1.25975
RCN2	0.0392438	0.794751	1.25826
SIPA1L1	0.0112026	0.796066	1.25618
API5	0.038278	0.79621	1.25595
SYMPK	0.0485991	0.797021	1.25467
PDS5B	0.0284952	0.797536	1.25386
YEATS2	0.0163011	0.797782	1.25348
SCAF11	0.0175653	0.797968	1.25318
CNDP2	0.0172815	0.798618	1.25216
GATAD2A	0.0281239	0.798772	1.25192
CBX5	0.00496793	0.800773	1.24879
FDX1L	0.0422866	0.801488	1.24768
VAC14	0.0442422	0.801914	1.24702
STAT1	0.00135126	0.80215	1.24665
HSD17B4	0.0215637	0.803063	1.24523
TMEM245	0.00253356	0.803476	1.24459
GTF3C3	0.0125511	0.803552	1.24447
RLF	0.0239765	0.803766	1.24414
KIF5B	0.0366766	0.804451	1.24308
UGDH	0.0470774	0.804781	1.24257
MYH10	0.00445587	0.805186	1.24195
CHD2	0.0468253	0.805593	1.24132
POGZ	0.0101795	0.805674	1.2412
PLOD1	0.0309841	0.80584	1.24094
GINS2	0.0291386	0.806407	1.24007
DSP	0.00737991	0.8084	1.23701
EDRF1	0.0284335	0.808915	1.23622
DDX50	0.0298617	0.80901	1.23608
RBBP6	0.0378	0.809021	1.23606
KIF2C	0.0163664	0.809394	1.23549
MPDZ	0.0027361	0.809414	1.23546
DYNLRB1	0.0400331	0.810373	1.234
INTS10	0.0269941	0.810478	1.23384
SRP14	0.0340534	0.814052	1.22842
CLASP1	0.0190625	0.814335	1.228
ZMYM4	0.0108439	0.814497	1.22775
STAU2	0.00116977	0.816801	1.22429
ITSN1	0.0210613	0.817704	1.22294
AGO2	0.0118832	0.823541	1.21427
WDR89	0.0376449	0.82535	1.21161
QTRT1	0.00879528	0.827071	1.20909
PAPSS1	0.000160005	0.828751	1.20664
ZMYM2	0.012489	0.829155	1.20605
NHSL1	0.00206944	0.829586	1.20542
SNTB2	0.0244356	0.830089	1.20469
EPB41	0.0396115	0.830416	1.20422
SPEN	0.0407148	0.830474	1.20413
SERINC1	0.043923	0.830974	1.20341
AAAS	0.0384111	0.831589	1.20252
CHAMP1	0.00135926	0.832607	1.20105
OAT	0.0491047	0.833846	1.19926
AMFR	0.043967	0.834327	1.19857
TRAPPC8	0.00658683	0.834685	1.19806
ODR4	0.0254308	0.835654	1.19667
SON	0.0376882	0.838743	1.19226
LSM6	0.0331855	0.838786	1.1922
SHPRH	0.0335688	0.839707	1.19089
FKBP8	0.0409581	0.840418	1.18988
PDIA6	0.0142419	0.840904	1.1892
GDAP1	0.00119877	0.842269	1.18727
CHD1	0.0235746	0.843124	1.18606
TCOF1	0.0486327	0.843303	1.18581
MGEA5	0.0365042	0.84379	1.18513
BANP	0.0307018	0.844225	1.18452
FANCD2	0.0375487	0.846089	1.18191
ALPL	0.0396527	0.846536	1.18128
SMC1A	0.0405592	0.847269	1.18026
COIL	0.0185764	0.848963	1.17791
UGGT1	0.0207681	0.851577	1.17429
BZW2	0.0371675	0.854924	1.16969
HCFC1	0.0163785	0.856908	1.16699
ARHGAP12	0.0445943	0.858163	1.16528
PHF8	0.013674	0.858448	1.16489
CASK	0.00584431	0.86266	1.15921
RDH11	0.041423	0.865847	1.15494
SNRPB2	0.0461514	0.866699	1.1538
PRKDC	0.00866236	0.875938	1.14163
PPP1R12A	0.0159395	0.875987	1.14157
L1TD1	0.0326884	0.877153	1.14005
LIG3	0.0196993	0.878096	1.13883
ADD2	0.0416918	0.87837	1.13847
RBM12B	0.00738056	0.880365	1.13589
DYNC1I2	0.0198268	0.882319	1.13338
GARS	0.0473344	0.891197	1.12209
RDH13	0.0216776	0.899137	1.11218
IGF2R	0.00283954	0.905178	1.10475

## Sheet: Mass Spec DAP5 KD
																		RNAseq
Gene Names	Protein names	Peptides	Unique peptides	p-value shNT/shDAP5	q-value shNT/shDAP5	Ratio shNT/shDAP5	Intensity: shDAP5#1	Intensity: shDAP5#2	Intensity: shDAP5#3	Intensity: shDAP5#4	Intensity: shNT#1	Intensity: shNT#2	Intensity: shNT#3	Intensity: shNT#4	Sequence coverage [%]	Mol. weight [kDa]		baseMean	log2FC (shNT/shDAP5)	padj	Significant DEG	Direction in shDAP5
AAAS	Aladin	14	14	0.0384111	0.18038	1.20252	204069900	181560000	199269900	165690000	199869900	254560200	231390000	217280100	32.6	59.573		60.6107	0.0123356	0.979983	no	down
AACS	Acetoacetyl-CoA synthetase	19	13	0.0227256	0.140425	0.841435	73792970	71491030	67745970	66283970	53378020	59348970	55582020	67442050	25.9	75.143		95.232	-0.138591	0.718944	no	up
AADAT	Kynurenine/alpha-aminoadipate aminotransferase, mitochondrial	3	3	0.703963	0.858248	0.885468	1842801	2067301	2334599	1012700	745413	2117300	1841201	1905399	7.3	47.351		14.1113	-0.268973	0.724388	no	up
AAGAB	Alpha- and gamma-adaptin-binding protein p34	3	3	0.923896	0.970006	1.01565	7175504	6847599	7291204	6506996	4945701	7480096	6477898	10351000	15.9	34.593		20.0483	0.0617209	0.935765	no	down
AAK1	AP2-associated protein kinase 1	12	12	0.0104234	0.0908991	0.762059	29825000	27325000	34484980	28042980	19691000	23729990	22569990	25202990	21.2	103.88		19.1501	-1.04875	0.0262183	yes	up
AAMDC	Mth938 domain-containing protein	5	5	0.0267559	0.151147	1.36181	5243400	6904798	5460097	6771401	8875495	6851302	7731999	9791502	48.4	13.332		4.28124	-1.26414	0.266241	no	up
AAMP	Angio-associated migratory cell protein	7	7	0.0596579	0.219817	0.724919	20311010	22977010	18404000	27137000	12508000	15601010	15415010	21398010	18.2	46.75		92.0336	-0.134938	0.697794	no	up
AAR2	Protein AAR2 homolog	11	11	0.768522	0.891631	1.04337	27984990	26264000	27619010	25271990	18884010	32056990	28875000	34781000	33.9	43.472		56.471	0.0486248	0.917908	no	down
AARS	Alanine--tRNA ligase, cytoplasmic	41	19	0.36561	0.612729	1.07249	317359900	373930100	291369900	301050000	355310000	342660200	302449900	373999800	49.2	106.81		322.469	0.413793	0.00671009	no	down
AARS2	Alanine--tRNA ligase, mitochondrial	26	26	0.82834	0.924278	1.02459	85746970	96819050	93362960	71406970	110570000	88441020	83885970	74356960	37	107.34		48.0238	-0.214387	0.607209	no	up
AARSD1	Alanyl-tRNA editing protein Aarsd1	11	11	0.247064	0.496199	0.86762	57928020	69196020	53800000	74932000	51045010	60908970	45628980	64545000	33.5	45.479
AASDH	Acyl-CoA synthetase family member 4	2	2	0.425642	0.662252	1.3365	1208118	530510	560020	873290	1552884	528790	1633987	745370	2.3	122.6		26.8267	0.273512	0.614932	no	down
AASDHPPT	L-aminoadipate-semialdehyde dehydrogenase-phosphopantetheinyl transferase	11	10	0.69138	0.850397	0.919845	59019000	50933980	24728990	53125980	40903010	40756020	38694000	43831000	35.9	35.776		33.7978	0.0578216	0.924605	no	down
AASS	Alpha-aminoadipic semialdehyde synthase, mitochondrial;Lysine ketoglutarate reductase;Saccharopine dehydrogenase	50	50	0.0207948	0.134013	0.690787	1328000000	1249599000	972400600	883000100	835069800	859950300	681779700	662689900	54.5	102.13		229.242	-0.304818	0.0943912	no	up
AATF	Protein AATF	20	20	0.273584	0.527644	0.90877	109060000	124010000	148960100	120110000	103580100	106120000	122070100	123000000	49.1	63.132
ABAT	4-aminobutyrate aminotransferase, mitochondrial	15	15	0.174131	0.405669	0.727791	15321990	19979990	23072010	15292000	9125700	19444000	10467010	16315990	40.6	56.438		7.75751	-0.08746	0.943411	no	up
ABCB10	ATP-binding cassette sub-family B member 10, mitochondrial	16	16	0.0511654	0.204256	0.375853	13312000	17655010	18749010	13832000	1835099	7573404	9896005	8843706	24.8	79.147		25.0249	-0.510402	0.282548	no	up
ABCB6	ATP-binding cassette sub-family B member 6, mitochondrial	10	10	0.976092	0.990668	1.00421	8907999	9933100	10258010	9348994	6550299	11112000	10298000	11513000	19.2	93.884		39.7118	-0.234546	0.628578	no	up
ABCB7	ATP-binding cassette sub-family B member 7, mitochondrial	17	6	0.0437763	0.193776	0.767069	18071010	20065010	26611990	20266000	15082010	14815990	15566990	19463010	26.1	82.64		56.6711	-0.0119042	0.979856	no	up
ABCB8	ATP-binding cassette sub-family B member 8, mitochondrial	10	10	0.844476	0.931714	1.03898	13333010	10985010	12162000	7227201	13789000	12613000	11226010	7683403	14.4	79.988		19.7039	0.106495	0.892182	no	down
ABCC1	Multidrug resistance-associated protein 1	29	29	0.398771	0.637452	0.927771	48479020	50227030	44636020	43333010	45842970	51719960	39959020	36830980	24.7	171.59		174.893	0.0901081	0.787341	no	down
ABCC4	Multidrug resistance-associated protein 4	9	9	0.826684	0.923267	1.03757	2947099	1925700	2149899	2801801	3181300	3039801	2014300	2033901	8.2	149.52		14.3124	1.91871	0.000175253	yes	down
ABCC5	Multidrug resistance-associated protein 5	9	8	0.535988	0.75281	0.859472	6832705	4764997	5599203	2795999	4692100	4790598	4445099	2783599	7.2	160.66		53.1094	-0.0198037	0.969242	no	up
ABCD1	ATP-binding cassette sub-family D member 1	6	4	0.0984026	0.290642	1.26881	2663100	3015700	3559198	2126799	3796798	3879101	3523098	3036499	10.7	82.936		15.4589	0.164998	0.850386	no	down
ABCD3	ATP-binding cassette sub-family D member 3	24	11	0.979705	0.992074	0.998207	34360020	43782990	34749010	37471000	34344980	41335020	37195980	36830010	38.8	75.475		21.7941	0.0556596	0.938463	no	down
ABCD4	ATP-binding cassette sub-family D member 4	6	6	0.686723	0.846626	1.10293	3119901	1692000	3090801	2211201	3587799	3770098	2047201	1927901	11.2	68.597		38.5685	0.22415	0.63648	no	down
ABCE1	ATP-binding cassette sub-family E member 1	22	22	0.103684	0.298377	0.808268	387219900	425279900	314500100	332029900	243210100	329919900	262820000	348020200	47.4	67.314		119.321	-0.231908	0.418405	no	up
ABCF1	ATP-binding cassette sub-family F member 1	39	39	0.048035	0.199944	0.897331	406130000	362419800	378019900	424820200	353709900	354350100	328750000	371929800	48	95.925
ABCF2	ATP-binding cassette sub-family F member 2	23	23	0.19305	0.430696	0.902117	136730000	123120000	130330000	148179900	128330000	116199900	105150000	137320000	34.5	71.289
ABCF3	ATP-binding cassette sub-family F member 3	20	20	0.0383838	0.180496	0.830159	71994970	58885960	66431980	78665980	57917980	58264970	51594030	60436990	34.4	79.744		33.8253	-0.467417	0.264784	no	up
ABCG2	ATP-binding cassette sub-family G member 2	5	5	0.00353472	0.0584512	0.450836	2544899	3878501	2734900	2043499	1323811	923250	1203600	1549164	7.8	72.313
ABHD10	Mycophenolic acid acyl-glucuronide esterase, mitochondrial	11	11	0.106754	0.303154	0.854165	33472990	40339980	43489010	39764980	28067980	34535990	34038010	37673020	48	33.932		22.2576	-0.0777701	0.912349	no	up
ABHD11	Alpha/beta hydrolase domain-containing protein 11	8	8	0.299874	0.547763	1.20139	11024000	18872010	10957000	12941010	20965000	15446000	13515010	14041990	28.3	34.69		10.7168	0.693148	0.340907	no	down
ABHD12	Monoacylglycerol lipase ABHD12	14	14	0.0865579	0.271536	1.29251	34741020	37333980	43933980	60943040	56878020	56016020	55896020	54422020	38.4	45.096		47.0217	-0.244301	0.570493	no	up
ABHD14B	Alpha/beta hydrolase domain-containing protein 14B	4	4	0.0592236	0.219575	0.541913	4793703	3771698	4783497	5889103	1270335	2739500	3176899	3973098	27.1	22.345		5.23532	0.446287	0.714711	no	down
ABHD16A	Abhydrolase domain-containing protein 16A	9	2	0.480516	0.70833	1.18361	8067005	10507010	11763000	12258000	12607990	15926990	17111010	6980798	20.6	63.243
ABHD17B	Alpha/beta hydrolase domain-containing protein 17B	4	4	0.141638	0.357872	0.684616	10953000	15210000	14336990	12290000	5169898	8829698	9817504	14389000	21.2	32.2		44.6714	0.0858383	0.865846	no	down
ABHD17C	Alpha/beta hydrolase domain-containing protein 17C	1	1	0.266236	0.519233	0.639341	2319640	1364402	661668	489270	614041	765080	499320	729790	8.1	35.098		34.3593	1.30387	3.66908e-05	yes	down
ABHD6	Monoacylglycerol lipase ABHD6	3	3	0.178794	0.412813	1.72781	1384501	992620	376158	1289472	2288201	1446499	1927500	931188	10.4	38.33
ABI1	Abl interactor 1	12	8	0.588	0.789318	0.88882	16682990	34070020	25169990	28301990	15148990	26628000	22275000	28122990	29.5	52.287		27.1683	0.403624	0.39875	no	down
ABI2	Abl interactor 2	13	9	0.000455456	0.0321039	1.67906	19437990	18278010	22108010	18320010	34077990	35938000	27393000	34092000	29	55.663		51.6701	0.303864	0.436126	no	down
ABL1	Tyrosine-protein kinase ABL1	11	9	0.631747	0.812932	0.916117	6869597	8105105	7837802	6631501	4085302	8200505	7971903	7632599	13.7	122.87		238.5	-0.374306	0.0446412	no	up
ABL2	Abelson tyrosine-protein kinase 2	7	5	0.840499	0.930535	0.897741	3691000	1414900	2052000	929440	2575898	450836	2421600	2300501	7.4	128.19		46.3918	-0.171133	0.719885	no	up
ABLIM1	Actin-binding LIM protein 1	17	7	0.0613019	0.222749	0.597195	5844697	9036294	9404705	7320800	3825002	3025399	5408898	7389197	25.1	87.687		36.8351	-0.604183	0.118538	no	up
ABR	Active breakpoint cluster region-related protein	6	5	0.0524864	0.206541	1.70056	3142399	1813801	1451000	1631401	4303898	3974501	2619902	2517801	8.8	97.597		32.4717	0.809499	0.0545684	no	down
ABRACL	Costars family protein ABRACL	3	3	0.348214	0.596794	0.341725	9764303	15042000	4515800	9029702	23842000	516548	514782	12881990	60.5	9.0564		39.1393	0.124039	0.836501	no	down
ABT1	Activator of basal transcription 1	13	13	0.268602	0.522388	0.896953	45697020	48567030	54740030	43555000	44220980	34724990	45686020	48820030	60.3	31.079		50.0421	0.0656021	0.895088	no	down
ACAA1	3-ketoacyl-CoA thiolase, peroxisomal	14	12	0.00871667	0.083392	0.834103	71796020	67775000	78578980	82078040	64630040	59148990	62350020	63733000	45.8	44.292		26.2187	-0.511747	0.254904	no	up
ACAA2	3-ketoacyl-CoA thiolase, mitochondrial	19	11	0.396946	0.636396	0.869899	68933960	105920000	96386980	98340020	83592030	65228000	66773980	108849900	60.7	41.924		108.493	-0.205497	0.473451	no	up
ACACA	Acetyl-CoA carboxylase 1;Biotin carboxylase	83	72	0.223701	0.467377	0.936764	574599900	557700200	566530200	606629700	478419900	540799700	553390300	592320100	43.4	265.55
ACAD10	Acyl-CoA dehydrogenase family member 10	14	14	0.211293	0.453194	1.45984	13270000	7108305	9920094	9344397	22534000	17536990	7422899	13538000	17.6	118.83		27.9374	0.732776	0.0856634	no	down
ACAD11	Acyl-CoA dehydrogenase family member 11	4	4	0.0525541	0.206336	1.62004	1623599	2668101	2946701	1728401	2519699	3618099	3474598	4797697	7.3	87.263		17.2839	0.608992	0.293125	no	down
ACAD8	Isobutyryl-CoA dehydrogenase, mitochondrial	11	11	0.00768425	0.0798522	0.730157	58220000	61069990	56665980	57588970	37617980	37927990	52484970	44039010	27.7	45.069		39.4464	-0.429795	0.247767	no	up
ACAD9	Acyl-CoA dehydrogenase family member 9, mitochondrial	21	16	0.177954	0.411635	0.909555	99503960	104320000	116609900	118040000	92778980	108990000	106180100	91077050	34.8	68.76		27.5429	0.0729588	0.911564	no	down
ACADM	Medium-chain specific acyl-CoA dehydrogenase, mitochondrial	18	12	0.428127	0.665511	0.956539	115930000	104850000	114730100	124450000	106040100	123020000	103559900	107549900	45.6	46.588		35.4415	0.129093	0.823834	no	down
ACADS	Short-chain specific acyl-CoA dehydrogenase, mitochondrial	7	3	0.88794	0.951822	1.02173	5860397	5751403	6136597	4360802	7846697	4314398	5365198	5411903	22.6	44.297		12.781	0.50061	0.496205	no	down
ACADSB	Short/branched chain specific acyl-CoA dehydrogenase, mitochondrial	9	9	0.0031508	0.0567232	2.51266	8275305	11743000	16578990	18130000	31967010	38490980	34944020	27078010	26.9	47.485		16.027	1.50001	0.00282956	yes	down
ACADVL	Very long-chain specific acyl-CoA dehydrogenase, mitochondrial	29	24	0.0221422	0.139172	0.778705	171729900	174460000	150029900	143229900	128260000	146110100	107579900	117419900	52.5	70.389		70.2686	-0.138826	0.726344	no	up
ACAP1	Arf-GAP with coiled-coil, ANK repeat and PH domain-containing protein 1	6	6	0.00381754	0.0590886	0.400741	4050298	3036102	4256799	4813702	1144061	1318900	1696083	2539300	10.3	81.535		16.0656	-0.717796	0.213889	no	up
ACAP2	Arf-GAP with coiled-coil, ANK repeat and PH domain-containing protein 2	16	16	0.362268	0.610179	0.944336	15823000	16465990	14406990	15349990	13709000	16336000	13173000	15532000	26.5	88.028		31.0977	-0.259283	0.605358	no	up
ACAT1	Acetyl-CoA acetyltransferase, mitochondrial	20	17	0.413922	0.652719	1.19703	121970100	76291980	131370000	87307050	174830100	141449900	86666940	102239900	56.4	45.199		20.3515	0.052807	0.947324	no	down
ACAT2	Acetyl-CoA acetyltransferase, cytosolic	16	11	0.953185	0.983632	0.982351	186640000	133899900	122770100	289940000	104930000	179279900	148860100	295830200	52.4	41.35		197.227	0.257706	0.290795	no	down
ACBD3	Golgi resident protein GCP60	17	9	0.149548	0.369734	1.38539	45994980	36243990	33474990	37973000	89194060	47979000	49048980	37189000	41.1	60.593		31.7999	0.0371734	0.954084	no	down
ACBD5	Acyl-CoA-binding domain-containing protein 5	12	12	0.0377701	0.179058	0.677548	17994010	20044990	22096000	25236000	9837097	15401990	16302000	17161010	22.5	60.091		13.1751	-0.153983	0.863289	no	up
ACBD6	Acyl-CoA-binding domain-containing protein 6	8	8	0.462856	0.695364	0.787086	5005402	7884602	6797997	12881990	2999802	7769699	7682204	7407801	35.1	31.15		29.6935	-0.27787	0.588396	no	up
ACD	Adrenocortical dysplasia protein homolog	3	3	0.957514	0.985632	1.02153	556899	1427800	1768299	1616200	1189584	588555	1982600	1782700	6.3	48.967		34.4554	0.106899	0.864505	no	down
ACIN1	Apoptotic chromatin condensation inducer in the nucleus	51	30	0.0867858	0.271985	1.20682	325660000	278280000	260920000	269280000	414530100	338239800	339779800	283500000	43.5	151.86		295.529	-0.0542514	0.860857	no	up
ACLY	ATP-citrate synthase	59	13	0.942738	0.979717	1.00935	250339900	201420100	242960100	321980000	287369800	218739900	223119900	291910100	61.3	120.84		606.788	0.281961	0.0912717	no	down
ACO1	Cytoplasmic aconitate hydratase	26	26	0.534439	0.751608	1.11383	177740000	119500000	125970000	192070100	157760000	200680100	125519900	199040000	34.6	98.398		69.4586	0.365133	0.227575	no	down
ACO2	Aconitate hydratase, mitochondrial	38	15	0.199017	0.436084	0.861966	222659900	238049900	274670100	186320000	170640000	218489900	182610100	219939900	50.6	85.424		166.072	-0.386321	0.0734403	no	up
ACOT1	Acyl-coenzyme A thioesterase 1;Acyl-coenzyme A thioesterase 2, mitochondrial	7	7	0.232092	0.477697	0.820467	14107990	13232000	19706000	11626000	12594000	15108010	10059000	10126000	23.3	46.277
ACOT13	Acyl-coenzyme A thioesterase 13;Acyl-coenzyme A thioesterase 13, N-terminally processed	5	5	0.553761	0.765835	0.9089	84277030	101360000	132800000	107770000	91610940	132139900	73962040	93185020	43.6	14.96		17.115	0.142086	0.854803	no	down
ACOT7	Cytosolic acyl coenzyme A thioester hydrolase	12	7	0.897663	0.956658	1.01367	65746960	52541970	46037020	62957010	48181010	61101000	62307990	57631020	37.4	41.796		102.483	0.425394	0.100634	no	down
ACOT8	Acyl-coenzyme A thioesterase 8	5	5	0.0822122	0.26593	1.29621	17991010	14302990	16201000	23559000	19657010	25469010	21611010	25626000	19.7	35.914		36.6823	0.443623	0.26311	no	down
ACOT9	Acyl-coenzyme A thioesterase 9, mitochondrial	22	20	0.0137964	0.109071	0.727439	184739900	196080000	216329900	170720100	118060000	149300000	127370000	166859900	50.3	49.901		34.5916	-0.276575	0.547885	no	up
ACOX1	Peroxisomal acyl-coenzyme A oxidase 1	16	16	0.946123	0.98022	0.987181	22961010	44610000	40149020	39604020	26030010	38449020	36608980	42216020	38.9	74.423		23.8721	-0.43486	0.408626	no	up
ACOX3	Peroxisomal acyl-coenzyme A oxidase 3	14	14	0.153697	0.375742	0.767717	85763980	92299030	82855950	72321040	52155990	84035040	46061010	81619990	26.4	77.628		15.744	0.305737	0.67938	no	down
ACP1	Low molecular weight phosphotyrosine protein phosphatase	4	4	0.325754	0.574587	1.15564	104080000	97366010	77920000	89687020	143179900	99480020	80368990	110340000	31.6	18.042		40.7148	0.102858	0.850857	no	down
ACP2	Lysosomal acid phosphatase	7	7	0.646779	0.824095	1.10104	6381301	7175400	7926303	10914000	12702990	10029010	6002301	7612705	20.6	48.344		21.9748	-0.164425	0.805434	no	up
ACP6	Lysophosphatidic acid phosphatase type 6	5	4	0.955549	0.984742	1.00952	6429299	4680298	8130197	6223398	4937501	8090299	7291802	5429001	15.4	48.886		14.3058	0.888174	0.122834	no	down
ACSF2	Acyl-CoA synthetase family member 2, mitochondrial	8	8	0.511577	0.736695	0.803604	13086990	9600901	5655200	6971197	13208000	7206001	4020198	5398804	18	68.124		6.91589	0.962701	0.254876	no	down
ACSF3	Acyl-CoA synthetase family member 3, mitochondrial	13	13	0.431966	0.668964	0.853976	27347990	27106990	25440000	25792990	38203980	21026990	15859000	20307010	28.8	64.129		27.6013	-0.589229	0.215985	no	up
ACSL1	Long-chain-fatty-acid--CoA ligase 1	9	9	0.0654444	0.23105	0.676552	14942010	13619000	12562010	10535990	11945000	9800101	5687900	8474698	14.8	77.942		8.15746	0.159753	0.892566	no	down
ACSL3	Long-chain-fatty-acid--CoA ligase 3	32	20	0.738645	0.877925	0.968694	83791970	89128990	97592050	102179900	111510000	76223020	89612950	86095020	53.2	80.419		112.342	-0.109664	0.747683	no	up
ACSL4	Long-chain-fatty-acid--CoA ligase 4	28	26	0.00546116	0.0657519	1.55645	270790100	197619900	215229900	189690100	383399900	371600000	291300200	308950100	46.7	79.187		90.3942	0.934768	7.56594e-06	no	down
ACSS2	Acetyl-coenzyme A synthetase, cytoplasmic	11	11	0.701324	0.856725	1.05061	42714000	28837000	26672010	29905000	39500010	33406990	29612990	30632000	14.4	78.579		35.7276	0.640992	0.124114	no	down
ACSS3	Acyl-CoA synthetase short-chain family member 3, mitochondrial	17	11	0.0263283	0.150617	1.57702	19668000	13273000	14404990	9606297	24733010	19860000	20326000	22378990	30.3	74.777		23.7115	0.814921	0.062103	no	down
ACTL6A	Actin-like protein 6A	16	4	0.0385994	0.18117	1.42877	49341010	44535990	81153980	64203970	81778980	83766060	83442970	83471990	50.6	47.46		53.6274	0.249491	0.532785	no	down
ACTN1	Alpha-actinin-1	61	7	0.239398	0.485496	0.765934	42104990	59391980	73569990	56659010	42013020	31537990	38777010	69824040	73.4	103.06		287.747	-0.0693789	0.828125	no	up
ACTN4	Alpha-actinin-4	63	11	0.0031408	0.0573582	0.601905	337179900	359130100	394320200	289759900	258259900	209290000	195129900	172180000	77.5	104.85		380.632	-0.0453059	0.871186	no	up
ACTR10	Actin-related protein 10	5	5	0.257693	0.510218	1.72689	5888597	8887695	1315875	2991501	4514398	7780502	7684805	6787696	18.5	46.306		24.5863	-0.0763043	0.909325	no	up
ACTR1A	Alpha-centractin	14	7	0.660023	0.831716	1.02838	95866950	105210000	97584060	79476980	95277010	99348060	95027050	97266940	47.9	42.613		75.1597	0.215137	0.529033	no	down
ACTR1B	Beta-centractin	12	5	0.442909	0.676228	0.772056	11566990	19608990	5874103	19575990	13631000	7148301	10146000	9373697	45.7	42.281		42.2069	-0.408589	0.305893	no	up
ACTR2	Actin-related protein 2	12	12	0.0588632	0.219162	0.755415	185240100	307360100	249299800	301719900	188560000	198289900	205109900	181850000	40.9	44.76		122.955	0.0619807	0.874185	no	down
ACTR3	Actin-related protein 3	20	14	0.172476	0.403388	0.859381	148900000	181600100	185770000	168370100	159300000	118759900	139369900	174960000	58.1	47.371		69.1087	-0.258571	0.486534	no	up
ACTR5	Actin-related protein 5	11	11	0.765521	0.889377	1.03436	18524010	16182990	15968990	11745010	14584010	16123010	18215990	15026000	27	68.297		27.4736	-0.103275	0.866423	no	up
ACTR6	Actin-related protein 6	5	5	0.960374	0.985722	1.0152	1849601	4675400	7150305	4893603	3690000	4276203	4408498	4620501	15.7	45.81		14.978	0.0376221	0.965783	no	down
ACTR8	Actin-related protein 8	10	2	0.518344	0.740335	0.621813	4147500	5333401	9312000	6163404	496807	7512603	7847797	6479902	17.3	70.483		33.825	-0.375169	0.418451	no	up
ACVR1	Activin receptor type-1	3	3	0.554017	0.765676	1.64239	849728	4633501	6253304	3493502	19564990	6040504	829772	6381900	6.7	57.152		15.2016	-0.0650937	0.938614	no	up
ACVR2B	Activin receptor type-2B	4	3	0.0802074	0.261991	1.95377	1831001	1769020	706417	695996	2052901	3563902	1834500	1728899	10.1	60.542		101.171	0.389352	0.157917	no	down
ACY1	Aminoacylase-1	10	9	0.224354	0.468115	1.12698	27584010	27347010	23133990	29704000	35322010	30444020	25068000	31018990	27.9	45.884
ACYP1	Acylphosphatase-1	4	4	0.17837	0.412531	1.24369	7931303	8753902	6830699	7827105	7042899	10516000	9009097	13310010	45.5	11.261		3.10255	2.42707	0.0846323	no	down
ADAM10	Disintegrin and metalloproteinase domain-containing protein 10	17	17	0.57191	0.778062	1.0467	64932970	67854970	68133010	58014010	63009960	80857000	68823950	59615000	25.9	84.141		89.1261	-0.161155	0.658802	no	up
ADAM17	Disintegrin and metalloproteinase domain-containing protein 17	15	15	0.0981376	0.290709	1.25438	17125990	24505990	22100000	17970990	22934000	30871010	26749980	21790000	25.5	93.02		38.3024	0.187087	0.705637	no	down
ADAM19	Disintegrin and metalloproteinase domain-containing protein 19	7	7	0.300327	0.548414	0.650527	1155700	1908899	850460	1201700	296441	1110800	1367300	896810	8.3	105		43.2411	-1.53801	3.18373e-06	yes	up
ADAM22	Disintegrin and metalloproteinase domain-containing protein 22	1	1	0.891018	0.953423	0.966442	734370	443350	834000	1344051	616230	865840	776541	768424	1.3	99.714		8.8075	1.08404	0.134425	no	down
ADAM9	Disintegrin and metalloproteinase domain-containing protein 9	5	5	0.124097	0.334741	0.279987	6810798	8124298	1029344	4579603	1777436	3955101	353049	645857	5.9	90.555		24.6184	-0.579717	0.200792	no	up
ADAMTS16	A disintegrin and metalloproteinase with thrombospondin motifs 16	8	8	0.037858	0.17932	0.298251	7560199	7341998	4122102	1388901	720000	1405100	1161200	2140508	9.6	136.2		60.243	-1.69028	1.21405e-11	yes	up
ADAMTS19	A disintegrin and metalloproteinase with thrombospondin motifs 19	5	5	0.00106392	0.0399416	3.55048	1892200	1553170	1166099	954673	6316202	5880801	4308202	3248899	5.8	134.05		56.7943	0.649318	0.028051	no	down
ADAMTS7	A disintegrin and metalloproteinase with thrombospondin motifs 7	5	4	0.968582	0.987683	1.01986	1722700	804181	2711606	1201251	3271099	2086701	1446729	494371	4.6	184.09		169.297	0.940401	7.29874e-07	no	down
ADAR	Double-stranded RNA-specific adenosine deaminase	43	28	0.000255828	0.0280741	1.54512	458660100	435620300	471790100	393030000	727290200	695909600	690360100	604340300	42.8	136.06
ADARB1	Double-stranded RNA-specific editase 1	5	5	0.749749	0.88226	1.05963	1151499	561610	1113824	783343	918599	822400	986143	954860	10.8	80.762		12.4455	-0.164293	0.857007	no	up
ADAT3	Probable inactive tRNA-specific adenosine deaminase-like protein 3	3	3	0.235794	0.481523	3.39108	1852457	1403600	236444	2289801	446734	5162597	17737990	4550398	11.1	38.07		23.2372	0.0836288	0.911467	no	down
ADCK3	Atypical kinase ADCK3, mitochondrial	10	10	0.196573	0.434087	0.843598	26625010	29378010	29831980	21699010	26355000	26072000	20484000	18219000	19.3	71.949
ADCK4	AarF domain-containing protein kinase 4	11	11	0.664299	0.833119	1.04817	18311000	16539000	20232990	14384000	17087990	22448990	16452000	16856990	22.2	60.069
ADCY2	Adenylate cyclase type 2	12	4	0.379689	0.621409	1.30708	2177799	2241085	1119274	1152660	3726499	1652901	2030401	1469600	11.7	123.6		113.238	0.101199	0.773279	no	down
ADCY9	Adenylate cyclase type 9	4	4	0.216762	0.459798	0.580643	844140	990080	1484800	1361267	1943817	357063	547171	505602	4.4	150.7		28.9842	-0.1355	0.822145	no	up
ADD1	Alpha-adducin	23	22	0.507661	0.733369	1.03556	153120100	178420000	159480000	146589900	173109900	165389900	153019900	167650000	35.4	80.954		140.969	-0.47392	0.0203616	no	up
ADD2	Beta-adducin	31	18	0.0416918	0.187798	1.13847	61156040	60651020	60176040	56004020	77274000	63829970	63376980	67177040	54.7	80.853		249.784	-0.560301	0.00126696	no	up
ADD3	Gamma-adducin	23	23	0.133406	0.345507	0.871503	84553020	98315970	109660000	94030020	78604960	81980010	77174970	99427950	41.2	79.154		90.0514	0.139966	0.730288	no	down
ADH5	Alcohol dehydrogenase class-3	13	7	0.878554	0.947765	0.971794	256129900	201710000	207240100	191470000	250339900	232630100	125380000	250400100	31	39.724		163.515	0.202255	0.434953	no	down
ADI1	1,2-dihydroxy-3-keto-5-methylthiopentene dioxygenase	7	7	0.674475	0.838342	1.11992	8361304	25984010	16732010	19545990	14946000	17763010	22985000	18317010	43.6	21.498		9.33583	-0.666086	0.417979	no	up
ADK	Adenosine kinase	10	7	0.551766	0.765008	0.913686	15148010	18230010	13471000	14360990	14982000	14946000	9607796	17306000	31.2	40.545		16.7218	-0.00722044	0.994884	no	up
ADNP	Activity-dependent neuroprotector homeobox protein	43	22	0.000665975	0.0372427	1.71149	84832060	84953040	90870060	83334050	172130000	127720000	166440000	127970000	41.7	123.56		310.987	-0.13055	0.565493	no	up
ADNP2	ADNP homeobox protein 2	13	13	0.0560571	0.213355	1.30059	26654000	17288010	22492000	18002000	29817000	24038990	28210990	26401000	14.5	122.83		187.141	0.152954	0.520359	no	down
ADO	2-aminoethanethiol dioxygenase	4	4	0.240666	0.487547	1.87696	6488200	8057699	972489	4638999	7894803	7373505	8360199	6015003	15.6	29.751		67.5314	0.48797	0.173417	no	down
ADPGK	ADP-dependent glucokinase	8	8	0.490233	0.716687	1.07153	9666698	11138000	12896000	9358603	9912399	12066990	11008010	13010000	19.9	54.088		43.5822	0.149064	0.772675	no	down
ADPRHL2	Poly(ADP-ribose) glycohydrolase ARH3	10	10	0.279704	0.532871	0.856004	54127960	72257010	51094030	68306990	53335000	46257020	43600000	68134000	34.4	38.946		36.9025	-0.137848	0.804795	no	up
ADRBK1	Beta-adrenergic receptor kinase 1	14	10	0.957789	0.985321	0.995137	9196006	10131010	9949594	10981000	8354895	11445990	9110198	11458000	21.8	79.573
ADRM1	Proteasomal ubiquitin receptor ADRM1	8	8	0.789154	0.903804	0.959382	67880990	60199980	49456020	79438020	82720990	53045970	60722030	51044000	20.6	42.153		224.696	-0.3275	0.11854	no	up
ADSL	Adenylosuccinate lyase	14	14	0.157768	0.381635	0.830162	225080000	262970100	224219900	289420000	179320000	180410000	207770100	271409800	35.5	54.889		176.734	-0.156776	0.592846	no	up
ADSS	Adenylosuccinate synthetase isozyme 2	16	15	0.171105	0.402408	0.881555	253350100	262800100	245350000	243620100	186909900	226589900	208550100	272120200	43.6	50.097		62.9631	-0.187931	0.634554	no	up
ADSSL1	Adenylosuccinate synthetase isozyme 1	4	3	0.14377	0.359592	0.522476	1452901	1347900	2512202	440836	870480	628660	629743	468980	11.8	50.208
AEBP1	Adipocyte enhancer-binding protein 1	8	3	0.725086	0.870222	0.920329	1869100	1188383	2609200	1729901	2106801	1572900	2035001	1066600	8.4	130.93		54.9587	0.241302	0.567524	no	down
AEBP2	Zinc finger protein AEBP2	6	6	0.366179	0.613526	1.09009	10479990	8543003	12046000	8738904	11128990	11514990	10587000	9809006	18.4	54.466		46.4151	0.332669	0.37338	no	down
AEN	Apoptosis-enhancing nuclease	2	2	0.384282	0.625177	1.33829	1556300	848733	2440802	824631	1916901	2494499	1593601	1119181	8	36.35		97.7235	-0.0142751	0.972633	no	up
AFAP1	Actin filament-associated protein 1	3	1	0.234762	0.480016	0.723562	1584900	1317800	1401000	897781	520882	1260599	1284900	853450	4.5	80.724		28.5489	-0.505558	0.261802	no	up
AFF1	AF4/FMR2 family member 1	7	7	0.646459	0.823955	1.11986	2628099	4114300	4261000	3880599	5853397	4467700	2261201	4755199	6.5	131.42		126.836	-0.426945	0.0441853	no	up
AFF4	AF4/FMR2 family member 4	15	5	0.920673	0.968136	1.02739	5104603	3377501	3251202	3344699	7288101	2663501	4006901	2685501	15.7	127.46		161.26	-0.585838	0.00186246	no	up
AFG3L2	AFG3-like protein 2	39	12	0.852641	0.935206	1.03667	78294950	84080050	89351030	40332990	76114970	70140000	72787980	70510040	53.1	88.583		161.019	-0.446665	0.0302784	no	up
AFTPH	Aftiphilin	9	9	0.920176	0.967873	0.9832	2679402	5739500	4014101	4473598	3815901	4347700	3775200	4120299	11.3	102.11		27.2988	-0.216127	0.738142	no	up
AGA	N(4)-(beta-N-acetylglucosaminyl)-L-asparaginase;Glycosylasparaginase alpha chain;Glycosylasparaginase beta chain	4	4	0.52788	0.747148	0.867009	7505505	15566990	16752990	9769804	7981299	11580990	11998000	9743799	19.7	37.022		5.35666	-0.426301	0.746292	no	up
AGAP1	Arf-GAP with GTPase, ANK repeat and PH domain-containing protein 1	7	6	0.0317456	0.164538	4.361	5246798	2254401	2655899	445339	8238299	10641000	7548703	7646799	11.7	94.469		70.3107	-0.313161	0.341508	no	up
AGAP3	Arf-GAP with GTPase, ANK repeat and PH domain-containing protein 3	8	7	0.186039	0.419957	1.96747	2231300	5629904	17903010	5370201	13987000	14878000	11454000	7592402	11.2	95.043		67.3765	0.674047	0.0123404	no	down
AGFG1	Arf-GAP domain and FG repeat-containing protein 1	10	10	0.197312	0.434193	0.671757	46742990	73824000	64571030	62756980	19082000	49271000	54194990	55883980	24.7	58.259		91.2612	-0.282041	0.324172	no	up
AGK	Acylglycerol kinase, mitochondrial	15	15	0.232392	0.47793	0.724937	96637970	133800000	143950000	120700100	45051970	110280000	113449900	110080000	44.1	47.137		7.96434	0.148663	0.903995	no	down
AGL	Glycogen debranching enzyme;4-alpha-glucanotransferase;Amylo-alpha-1,6-glucosidase	41	41	0.00324045	0.05808	0.767039	86405980	74815980	70416980	78719980	53536970	63150990	60622970	60519980	31.3	174.76		59.7262	-0.330102	0.325644	no	up
AGMAT	Agmatinase, mitochondrial	6	5	0.984848	0.99468	1.00328	7802804	9240196	8788203	9749804	10944000	5543599	10038000	10278000	18.8	37.66		5.47911	0.953137	0.370002	no	down
AGO1	Protein argonaute-1	24	12	0.0711759	0.243127	0.906525	32170980	37430010	37486020	34897020	30677990	34482020	32395010	31042990	40.3	97.213		123.198	-0.643411	0.00255803	no	up
AGO2	Protein argonaute-2	24	17	0.0118832	0.0992207	1.21427	48398010	42900020	42924020	44792970	56342000	51169000	49539000	60767000	35	97.207		119.825	-0.100508	0.757141	no	up
AGO3	Protein argonaute-3	13	2	0.871823	0.94616	0.930286	436414	1581300	819950	2196499	1662361	650063	1285797	669953	19.3	97.359		15.4295	-0.217566	0.784797	no	up
AGPAT1	1-acyl-sn-glycerol-3-phosphate acyltransferase alpha	7	7	0.0311712	0.162731	1.45069	31087010	32244010	37511000	26556000	55683970	51302980	46396980	33365010	30	31.716
AGPAT2	1-acyl-sn-glycerol-3-phosphate acyltransferase beta	3	3	0.233177	0.478554	1.53319	5117604	3514598	3183100	1306000	4287502	6608098	4393300	3319299	12.9	30.914		24.3128	0.377632	0.494735	no	down
AGPAT4	1-acyl-sn-glycerol-3-phosphate acyltransferase delta	5	5	0.0223478	0.139788	1.6842	7689500	7455798	4923903	6620297	13998010	12967000	10952000	7563998	12.2	44.021		20.4716	0.194592	0.782971	no	down
AGPAT5	1-acyl-sn-glycerol-3-phosphate acyltransferase epsilon	4	4	0.14821	0.36734	1.30559	24606010	17098010	15895000	29646990	25808000	28813980	24170000	32049020	12.1	42.072		83.0802	-0.393341	0.148599	no	up
AGPAT6	Glycerol-3-phosphate acyltransferase 4	11	10	0.896587	0.956868	1.01988	7352702	8304798	6467099	9324097	5518897	8685805	9033798	9199496	23.7	52.07
AGPS	Alkyldihydroxyacetonephosphate synthase, peroxisomal	23	23	0.0235413	0.143928	0.86067	190560100	193629900	212339900	182490100	156530100	162250000	165470000	186689900	43.3	72.911		48.3635	0.000433907	0.999407	no	down
AGRN	Agrin;Agrin N-terminal 110 kDa subunit;Agrin C-terminal 110 kDa subunit;Agrin C-terminal 90 kDa fragment;Agrin C-terminal 22 kDa fragment	24	24	0.430678	0.668303	0.81645	58273980	69947020	60078970	26943990	54225020	41696010	40575000	31958980	15.3	217.32		354.144	0.409667	0.126151	no	down
AGTPBP1	Cytosolic carboxypeptidase 1	21	21	0.962479	0.986147	1.00249	29179010	29294000	31687990	34754980	32365000	30893020	28846000	32966010	21.7	138.45		83.7886	0.0669285	0.866696	no	down
AGTRAP	Type-1 angiotensin II receptor-associated protein	4	4	0.660062	0.83164	1.37988	660606	12893000	6242904	10742010	6253800	8540801	7936296	4885103	35.2	17.419		33.8427	0.0695862	0.907411	no	down
AHCTF1	Protein ELYS	63	58	0.00678739	0.0737972	1.28038	186940100	207900100	231230100	206360000	259899900	264640000	298510000	242750100	36	252.5		174.611	-0.159717	0.572079	no	up
AHCY	Adenosylhomocysteinase	21	4	0.981094	0.993014	1.00462	223870100	216100100	292110000	221120100	151420000	217230100	303090000	319270100	45.4	47.716		406.506	-0.0954225	0.698747	no	up
AHCYL1	Putative adenosylhomocysteinase 2	10	5	0.423398	0.659859	0.730351	12383000	12037010	7717803	18354990	10342000	19699000	4400200	6701897	21.1	58.951		90.9111	-0.170411	0.596554	no	up
AHCYL2	Putative adenosylhomocysteinase 3	10	5	0.423611	0.659841	0.842449	8074303	13363010	12973000	7714896	8042097	10991990	6057602	10158000	17.2	66.72		19.0332	-0.447027	0.435514	no	up
AHDC1	AT-hook DNA-binding motif-containing protein 1	13	13	0.00246584	0.0493058	1.82519	4737403	7212301	5221298	5954302	9531103	10097000	13137000	9324405	14.9	168.35		87.4164	0.477597	0.0933901	no	down
AHNAK	Neuroblast differentiation-associated protein AHNAK	126	126	0.884679	0.950676	1.02144	220549900	328169800	268240000	214400000	209380000	238369900	333500200	272219800	39.4	629.09
AHNAK2	Protein AHNAK2	11	11	0.202663	0.440517	0.431149	11446990	1935301	11250000	6965200	3632002	4968599	815294	4076998	10.4	616.62		20.7862	0.696947	0.16507	no	down
AHSA1	Activator of 90 kDa heat shock protein ATPase homolog 1	18	18	0.776872	0.895654	0.970324	110780000	144770100	121420000	147470100	109950000	119730000	124190000	155710000	60.1	38.274		85.1833	-0.500917	0.050876	no	up
AIDA	Axin interactor, dorsalization-associated protein	11	11	0.143557	0.359817	1.39332	28928990	25195990	17933990	18374000	43539980	37244010	24512010	22772990	43.8	35.023		44.7069	-0.234334	0.614661	no	up
AIF1L	Allograft inflammatory factor 1-like	6	6	0.643221	0.821662	1.16195	50332990	29371020	28116010	25599010	68042000	43196990	35176990	18759000	32.7	17.068		27.341	0.838021	0.0362332	no	down
AIFM1	Apoptosis-inducing factor 1, mitochondrial	26	12	0.322836	0.572591	0.889222	395010000	430730100	462160000	320549900	425079800	376290200	306990100	320940000	51.2	66.9		119.117	-0.20447	0.480946	no	up
AIG1	Androgen-induced gene 1 protein	1	1	0.755424	0.883886	1.14023	597533	1050658	3120000	955909	1040460	867646	1838701	1906700	6.3	27.458		17.2242	-0.300043	0.657808	no	up
AIM1	Absent in melanoma 1 protein	31	31	0.124753	0.335569	1.17685	31965990	25267010	25688990	25300000	37511000	33738990	28834980	27592000	25.9	188.67
AIMP1	Aminoacyl tRNA synthase complex-interacting multifunctional protein 1;Endothelial monocyte-activating polypeptide 2	21	21	0.116034	0.318756	0.917196	193609900	195289900	179800000	167330000	175210000	169610100	154349900	175510000	81.4	34.352		39.9756	-0.371522	0.371185	no	up
AIMP2	Aminoacyl tRNA synthase complex-interacting multifunctional protein 2	11	11	0.997194	0.999082	1.00196	76188970	83985950	13590010	46012020	72444970	46856030	68321980	17387990	51.9	35.348		97.9257	-0.221369	0.512967	no	up
AIP	AH receptor-interacting protein	8	8	0.100276	0.294376	0.916376	24524010	28180010	25499000	23104000	22009000	23578000	23514000	23528990	36.7	37.636		23.4113	0.537139	0.255667	no	down
AJUBA	LIM domain-containing protein ajuba	1	1	0.908144	0.963208	0.977306	1223700	603374	794450	859647	741500	644640	837790	1148700	2.8	56.933		33.3555	0.970668	0.0113176	no	down
AK1	Adenylate kinase isoenzyme 1	8	4	0.400792	0.63931	0.84134	15953990	17461000	21185010	24642020	10945000	20367990	14546000	22470990	45.4	21.635		8.06398	0.043003	0.970638	no	down
AK2	Adenylate kinase 2, mitochondrial;Adenylate kinase 2, mitochondrial, N-terminally processed	16	16	0.663952	0.832958	0.918905	206199900	237290100	238649900	216549900	346419900	197460100	174720100	150850000	64	26.477		58.354	-0.455053	0.131538	no	up
AK3	GTP:AMP phosphotransferase AK3, mitochondrial	11	11	0.0503077	0.202857	1.30527	61125970	69208000	66902990	57736030	110980100	81517980	73025970	71796020	50.7	25.565		22.5645	-0.071794	0.919132	no	up
AK4	Adenylate kinase 4, mitochondrial	13	12	0.267491	0.521138	1.20348	178939900	284399800	356440100	268349900	367639900	306749900	301320000	300500100	66.4	25.268		94.1473	-0.157727	0.621615	no	up
AK6	Adenylate kinase isoenzyme 6	4	4	0.305793	0.55391	0.42061	3790098	19289990	16279000	20788000	888818	4242400	12776010	16073990	25.6	20.061		6.28627	-0.261147	0.833513	no	up
AKAP1	A-kinase anchor protein 1, mitochondrial	35	35	0.885523	0.950957	0.986981	75926020	62684010	75050970	57101040	69762030	65241980	57758020	73624970	44.6	97.34		136.555	-0.0790785	0.823157	no	up
AKAP10	A-kinase anchor protein 10, mitochondrial	4	4	0.319978	0.570182	0.660371	5022299	4059100	3101899	2374700	936130	4354200	1950900	3591202	8.5	73.631		20.7979	-0.210352	0.761216	no	up
AKAP11	A-kinase anchor protein 11	3	3	0.702203	0.857154	1.13368	433294	1420034	1740727	1029639	1164000	1013000	1366200	1130799	1.8	210.51		103.049	0.245013	0.437723	no	down
AKAP12	A-kinase anchor protein 12	102	101	0.179375	0.41282	1.11321	851629900	877560500	872250200	725710200	1068700000	925119600	824229600	891539700	72.3	191.48		382.487	-0.135169	0.614932	no	up
AKAP13	A-kinase anchor protein 13	39	38	0.751763	0.883073	1.02846	58978990	60438990	71448980	57220960	54479030	59094040	73370000	69026980	20.1	307.55		123.914	-0.133188	0.666153	no	up
AKAP17A	A-kinase anchor protein 17A	19	19	0.384342	0.625159	1.0445	35066980	36167980	37730990	35063000	41503020	34421990	35636000	39227990	28.6	80.735
AKAP2	A-kinase anchor protein 2	24	24	0.935851	0.976718	1.00699	77880040	72191020	91912050	68872020	80615980	66680990	79546050	85581960	38.2	94.659
AKAP7	A-kinase anchor protein 7 isoform gamma;A-kinase anchor protein 7 isoforms alpha and beta;A-kinase anchor protein 7 isoform alpha	4	4	0.197652	0.434307	2.38561	1727391	626637	385202	859919	5644504	1587654	493485	2626001	12.6	39.517		4.04826	0.115602	0.94269	no	down
AKAP8	A-kinase anchor protein 8	12	12	0.634168	0.81534	1.04792	64952030	73802050	79210020	65280030	64346980	64574020	86820040	82855950	25.6	76.107		54.7033	-0.474594	0.12664	no	up
AKAP8L	A-kinase anchor protein 8-like	14	14	0.417445	0.654429	0.941252	34219980	39476000	40445020	33350020	34067000	31587020	33411010	39780020	28.9	71.639		80.8309	0.428091	0.204879	no	down
AKAP9	A-kinase anchor protein 9	65	59	0.0594979	0.220259	1.1898	21642000	23305000	26648990	24849000	31806980	31482000	24912000	26830990	20.5	452.98		85.6447	0.180741	0.631246	no	down
AKR1A1	Alcohol dehydrogenase [NADP(+)]	19	12	0.0645649	0.228643	1.20045	79544050	74838050	68573010	81206030	94307020	99810950	73776000	99131060	58.5	36.573		131.264	0.273189	0.243907	no	down
AKR1B1	Aldose reductase	12	6	0.961465	0.985922	0.935012	55056980	21319000	17862010	805820	107250000	19927990	5400603	1118700	45.3	35.853		84.5753	0.438625	0.1151	no	down
AKR1C3	Aldo-keto reductase family 1 member C3;Aldo-keto reductase family 1 member C21;Aldo-keto reductase family 1 member C1	3	1	0.256082	0.508335	0.772486	1260200	1134000	739610	922570	940364	759040	479370	1014812	13	36.853
AKR7A2	Aflatoxin B1 aldehyde reductase member 2	9	9	0.00784526	0.0808879	1.35583	30199000	32484990	39126000	37815990	47068990	48633020	41350980	51819000	30.9	39.589		62.7559	0.621225	0.021105	no	down
AKT1	RAC-alpha serine/threonine-protein kinase	7	6	0.203035	0.441196	1.90213	966896	4920201	2910100	3099398	2093747	5341100	7022797	7152299	19.2	55.707		68.7191	0.232559	0.495782	no	down
AKT1S1	Proline-rich AKT1 substrate 1	5	5	0.251854	0.502232	0.665822	3427300	3411099	7247103	4914999	1562900	2933602	3105998	5746904	16.4	27.383		33.8432	-0.699278	0.0800012	no	up
AKT2	RAC-beta serine/threonine-protein kinase	10	9	0.324611	0.574121	1.13788	7546099	8184400	7322503	8717199	7098397	9943006	7938196	11796000	22.9	55.768		98.3048	0.121231	0.724321	no	down
AKTIP	AKT-interacting protein	3	3	0.472147	0.701741	1.31009	1230728	4000300	3785100	5012601	2569035	5183100	4344603	4756500	18.5	33.128		7.18302	-0.505529	0.61217	no	up
ALAD	Delta-aminolevulinic acid dehydratase	4	4	0.527696	0.74705	1.27944	3606699	2199600	818820	2169001	1414563	3507501	2592201	2935600	17.9	36.294		8.67961	0.409691	0.660627	no	down
ALAS1	5-aminolevulinate synthase, nonspecific, mitochondrial	7	7	0.10969	0.309115	0.561595	5447997	12189990	10280000	9687706	2375400	6694697	6227703	6642803	13.3	70.58		57.7226	-0.495702	0.105047	no	up
ALB	Serum albumin	14	10	0.585262	0.787122	0.6208	14963000	4076901	31322990	4696798	1066831	15307010	19435010	4200003	20.2	69.366
ALCAM	CD166 antigen	9	4	0.532498	0.749797	1.29354	5516198	2287701	3997398	5332703	11744000	4061902	6373797	2477101	17.8	65.102		13.8785	1.53113	0.00414766	yes	down
ALDH16A1	Aldehyde dehydrogenase family 16 member A1	11	8	0.0905783	0.278062	1.23668	28650000	37022990	28389010	40326010	40726020	36984000	39268980	48019990	22.1	85.126		81.0586	0.317002	0.285001	no	down
ALDH18A1	Delta-1-pyrroline-5-carboxylate synthase;Glutamate 5-kinase;Gamma-glutamyl phosphate reductase	36	36	0.106044	0.302498	1.17515	792579900	796629700	825409500	649900000	1006799000	988600000	764849700	848489900	47.5	87.301		136.939	0.16541	0.572227	no	down
ALDH1B1	Aldehyde dehydrogenase X, mitochondrial	23	9	0.063215	0.226528	0.808688	140830000	104000000	122370000	109170000	97468010	100060000	79662020	107710000	46.8	57.206		99.2124	-0.044323	0.911347	no	up
ALDH1L1	Cytosolic 10-formyltetrahydrofolate dehydrogenase	4	3	0.772301	0.893753	0.636306	837566	4824099	50939980	1011830	4126699	537264	49775010	309360	5.3	98.828
ALDH2	Aldehyde dehydrogenase, mitochondrial	20	10	0.0596731	0.219669	1.22799	81271010	70356020	75417000	61971000	106380000	88647060	78076020	82533980	44.3	56.381		17.3736	1.62279	0.000417232	yes	down
ALDH3A2	Fatty aldehyde dehydrogenase	16	14	5.73916e-05	0.0186667	1.95529	120450000	121530000	126630000	111470000	236070100	276570100	206830100	223650000	34.4	54.847		61.1355	0.374772	0.308794	no	down
ALDH4A1	Delta-1-pyrroline-5-carboxylate dehydrogenase, mitochondrial	20	20	0.370582	0.614769	1.23943	176900100	108760000	118849900	110340000	250270100	175210000	130460000	104080000	46.9	61.719		42.8124	0.0588077	0.916288	no	down
ALDH5A1	Succinate-semialdehyde dehydrogenase, mitochondrial	5	2	0.83728	0.928698	1.13842	1546656	1762800	1477701	604596	3505002	2747599	1414600	300323	11.4	57.214		8.59893	0.184917	0.868231	no	down
ALDH6A1	Methylmalonate-semialdehyde dehydrogenase [acylating], mitochondrial	19	19	0.0270806	0.151505	1.86101	58839970	50094000	36086020	39440990	130900000	96381000	69792020	57148010	37.9	57.839		22.176	1.02909	0.0182591	yes	down
ALDH7A1	Alpha-aminoadipic semialdehyde dehydrogenase	24	24	0.070456	0.240757	1.32933	321840000	228660000	315860200	312280100	472899800	402899800	292929900	406140200	45.6	58.486		80.9075	0.768711	0.00079022	no	down
ALDH9A1	4-trimethylaminobutyraldehyde dehydrogenase	16	11	0.796502	0.907268	1.02703	158259900	145270100	128270000	138580100	178050000	147490000	115690000	149660100	36.8	53.801		81.8478	0.394709	0.187301	no	down
ALDOA	Fructose-bisphosphate aldolase A	31	10	0.65379	0.828199	0.947046	857880100	800289500	621630100	956489400	797379900	689749800	662870400	900709500	77.5	39.42
ALDOC	Fructose-bisphosphate aldolase C	23	18	0.732675	0.875312	1.05575	135479900	135930100	83948980	131509900	155260100	128469900	97689000	129630100	67.9	39.455		66.2006	0.00204288	0.997405	no	down
ALG1	Chitobiosyldiphosphodolichol beta-mannosyltransferase	10	10	0.337191	0.585309	0.891626	57825020	46070020	54453980	50064010	36784020	57004040	51614020	42411990	24.1	52.518		43.9161	-0.0803643	0.88242	no	up
ALG10B	Putative Dol-P-Glc:Glc(2)Man(9)GlcNAc(2)-PP-Dol alpha-1,2-glucosyltransferase;Dol-P-Glc:Glc(2)Man(9)GlcNAc(2)-PP-Dol alpha-1,2-glucosyltransferase	1	1	0.959952	0.985829	1.01093	669513	1416200	1362900	947410	953799	830523	1182900	1364600	3.2	55.447
ALG11	GDP-Man:Man(3)GlcNAc(2)-PP-Dol alpha-1,2-mannosyltransferase	3	3	0.883267	0.949996	0.977956	10424000	11136000	11485000	8582501	7297801	12292000	12643000	9228305	7.9	55.65		25.1074	-0.423012	0.412091	no	up
ALG12	Dol-P-Man:Man(7)GlcNAc(2)-PP-Dol alpha-1,6-mannosyltransferase	2	2	0.0323249	0.165619	1.41818	4262600	4687500	3683600	3696401	6426299	6782305	6085496	4149200	3.9	54.654		31.1779	0.633507	0.174415	no	down
ALG13	Putative bifunctional UDP-N-acetylglucosamine transferase and deubiquitinase ALG13	13	13	0.73435	0.876216	1.22553	3680203	14273990	16738000	12900010	45415990	5303097	10107990	10510010	14.4	126.05		73.2727	-0.0352253	0.93439	no	up
ALG14	UDP-N-acetylglucosamine transferase subunit ALG14 homolog	1	1	0.464601	0.695768	0.762291	1537382	446760	1240901	706150	671038	381856	1015945	780650	5.6	24.15		3.80022	-0.234943	0.884672	no	up
ALG2	Alpha-1,3/1,6-mannosyltransferase ALG2	7	7	0.125297	0.336002	0.705152	18668990	30838990	34894990	26984990	12869990	19866990	25262000	20752010	21.6	47.091		46.0346	-0.428997	0.227693	no	up
ALG3	Dol-P-Man:Man(5)GlcNAc(2)-PP-Dol alpha-1,3-mannosyltransferase	2	2	0.20103	0.438402	1.15576	7828999	5703397	7042303	6558800	7564498	7941597	9407603	6511600	4.6	50.126		57.4261	0.282946	0.494992	no	down
ALG5	Dolichyl-phosphate beta-glucosyltransferase	7	7	0.808292	0.915697	0.956669	17649990	25134010	29154990	20179990	22265990	21562010	29616990	15375000	27.2	36.946		17.7935	-0.651945	0.21241	no	up
ALG6	Dolichyl pyrophosphate Man9GlcNAc2 alpha-1,3-glucosyltransferase	6	6	0.544253	0.759151	1.06286	10387000	11573000	14869000	12003000	12177000	12864990	11566990	15109010	11.2	58.12		20.7659	0.618917	0.259576	no	down
ALG8	Probable dolichyl pyrophosphate Glc1Man9GlcNAc2 alpha-1,3-glucosyltransferase	2	2	0.840623	0.930549	1.03437	32139990	28197010	34290000	38551990	49144990	32533000	35667010	24049010	5.1	60.087		51.5898	0.101071	0.833513	no	down
ALG9	Alpha-1,2-mannosyltransferase ALG9	6	6	0.775938	0.895544	0.97158	13691000	9917904	14726010	10834000	11937010	12538000	11241010	11473990	12.1	69.863
ALKBH1	Alkylated DNA repair protein alkB homolog 1	8	8	0.0983176	0.290708	0.672782	4169100	4412801	4955603	6220404	4139502	3634298	1912501	4038299	35.5	43.831		17.6882	0.113421	0.887709	no	down
ALKBH4	Alpha-ketoglutarate-dependent dioxygenase alkB homolog 4	6	6	0.39207	0.631604	0.924456	11183000	9437800	10517000	8998895	9932995	7638999	9166498	10489000	22.5	33.837		20.1521	0.000897447	0.999086	no	down
ALKBH5	RNA demethylase ALKBH5	8	8	0.000186889	0.0217674	1.96506	13352010	12639000	14830010	12828000	22130000	25265010	26977000	31737000	24.9	44.255		123.957	-0.523516	0.0325755	no	up
ALKBH7	Alpha-ketoglutarate-dependent dioxygenase alkB homolog 7, mitochondrial	6	6	0.0187834	0.127531	0.723048	16708000	15257010	18608000	15970010	11450010	9512497	14653010	12973000	36.2	24.516		95.1956	-0.239935	0.450234	no	up
ALKBH8	Alkylated DNA repair protein alkB homolog 8	4	4	0.490705	0.716921	0.800647	1360795	1085400	496718	1189100	617433	1410654	616870	667221	6.5	75.208		10.5274	0.108906	0.918653	no	down
ALMS1	Alstrom syndrome protein 1	38	38	0.776386	0.895565	1.09158	5976700	14235000	13894000	14626010	9239805	8533702	18150000	17152000	15.4	461.06		280.864	0.216676	0.32777	no	down
ALPK3	Alpha-protein kinase 3	3	3	0.961167	0.985737	0.986157	699630	2161973	941040	1241299	1653174	963969	916920	1143600	2.9	201.27		80.2331	-0.164186	0.704585	no	up
ALPL	Alkaline phosphatase, tissue-nonspecific isozyme	21	20	0.0396527	0.18353	1.18128	128630000	108310000	138429900	116199900	138530000	143500000	159140100	137939900	52.7	57.304		170.44	1.03943	5.65268e-09	yes	down
ALS2	Alsin	19	19	0.300708	0.548678	0.946535	13566010	12045000	12300000	12223000	11739000	12748000	10624000	12403000	15.8	183.63		71.2756	0.149092	0.698034	no	down
ALYREF	THO complex subunit 4	13	3	0.0947462	0.286117	0.678246	132370000	156550000	250090100	173120000	81564010	149510000	144830000	107500000	57.6	26.888		195.692	-0.297406	0.129516	no	up
AMACR	Alpha-methylacyl-CoA racemase	4	4	0.87664	0.947423	1.10926	763119	2425400	3865601	2076499	668796	1127618	5556903	5367503	13.1	42.386		6.37025	0.149386	0.90769	no	down
AMBRA1	Activating molecule in BECN1-regulated autophagy protein 1	13	3	0.371121	0.61517	0.685835	1671200	2486001	2988299	2675299	546820	2175399	2585100	2389701	16.3	142.51		74.0265	-0.154781	0.671644	no	up
AMD1	S-adenosylmethionine decarboxylase proenzyme;S-adenosylmethionine decarboxylase alpha chain;S-adenosylmethionine decarboxylase beta chain;S-adenosylmethionine decarboxylase proenzyme 1;S-adenosylmethionine decarboxylase 1 alpha chain;S-adenosylmethionine decarboxylase 1 beta chain;S-adenosylmethionine decarboxylase proenzyme 2;S-adenosylmethionine decarboxylase 2 alpha chain;S-adenosylmethionine …	3	3	0.813226	0.918279	0.916469	637732	2295500	1651001	2003199	1593028	773629	1384599	2001600	16.2	38.339		134.345	-0.377684	0.175217	no	up
AMDHD2	Putative N-acetylglucosamine-6-phosphate deacetylase	5	5	0.520179	0.740716	0.637484	2212701	2404599	3577502	2132399	895694	352102	6216400	3419199	17.1	43.747		13.9997	0.156141	0.865043	no	down
AMER1	APC membrane recruitment protein 1	10	10	0.00685338	0.0743341	2.25804	1879301	3414600	1376101	2187200	3846702	5198802	4851801	5175000	11.6	124.03		40.5344	0.307296	0.449059	no	down
AMFR	E3 ubiquitin-protein ligase AMFR	10	10	0.043967	0.193864	1.19857	14440000	15564010	17881010	15405010	21156010	19641010	16268990	18899000	22.2	72.995		51.231	-0.0574017	0.911018	no	up
AMIGO3	Amphoterin-induced protein 3	5	5	0.34342	0.591865	0.376873	27774010	20186000	31028010	25416000	4155101	1170385	90002980	20378010	11.7	55.249		26.5036	-0.534877	0.249784	no	up
AMMECR1	AMME syndrome candidate gene 1 protein;AMME syndrome candidate gene 1 protein homolog	5	4	0.10732	0.304294	0.737351	3991098	6139697	3482798	4460600	2594399	3455500	2952500	4251299	17.1	35.463		34.4633	-0.113793	0.841346	no	up
AMOTL1	Angiomotin-like protein 1	5	2	0.957527	0.985512	0.985678	1048674	565980	842670	1092500	584043	706425	1549300	806890	7.1	106.57		63.7395	0.105881	0.801637	no	down
AMOTL2	Angiomotin-like protein 2	8	8	0.774972	0.89504	1.13097	2057800	1639600	1779100	1388700	864288	1991601	5749700	1378000	12.2	85.763		60.467	0.465895	0.155256	no	down
AMPD2	AMP deaminase 2	17	17	0.984903	0.994656	0.998651	22563990	27572020	26221990	29330000	25016980	27473010	24188000	28627020	20	100.69		41.9231	0.0749543	0.889332	no	down
AMT	Aminomethyltransferase, mitochondrial	9	9	0.986071	0.995074	1.00221	14584010	11200010	11285990	11951000	15312010	13875990	10180990	10275000	30.3	43.946		6.95227	-0.337424	0.765702	no	up
ANAPC1	Anaphase-promoting complex subunit 1	38	23	0.670589	0.835362	1.02531	51220030	45134000	54050020	54792020	53412970	50717010	48827970	57201980	23.6	216.5		249.456	-0.0397387	0.889695	no	up
ANAPC10	Anaphase-promoting complex subunit 10	3	3	0.947213	0.980611	0.967167	2723801	1758401	892940	4964699	4119400	2256301	872257	2291600	22.2	21.252		5.24891	-0.253488	0.85102	no	up
ANAPC15	Anaphase-promoting complex subunit 15	1	1	0.165821	0.395495	2.10387	3794400	2730799	622096	913863	1864701	3866000	3741903	4278403	8.3	14.281		11.4919	0.112847	0.91008	no	down
ANAPC2	Anaphase-promoting complex subunit 2	16	16	0.092534	0.281303	0.898062	22961010	26687990	24887010	27355000	20474010	23630990	24026980	23342990	20.7	93.827		58.2836	0.093973	0.834014	no	down
ANAPC4	Anaphase-promoting complex subunit 4	10	10	0.320307	0.570343	0.84904	20200010	23065000	27315000	30381010	15687010	19624990	23811000	27409010	14.7	92.115		29.8808	-0.256252	0.647308	no	up
ANAPC5	Anaphase-promoting complex subunit 5	14	5	0.64868	0.825631	0.936296	10169000	10380000	11955000	15445000	9206395	9687795	14076990	11930000	20.1	85.076		212.242	-0.00165628	0.997293	no	up
ANAPC7	Anaphase-promoting complex subunit 7	16	16	0.964516	0.986872	1.00846	38272990	38011980	61800980	32628020	31591990	45715990	38416000	54687010	32.4	66.855		102.014	-0.0127171	0.976391	no	up
ANGEL1	Protein angel homolog 1	2	2	0.341141	0.588922	1.54088	504976	483320	1192918	630102	1736254	569680	2041946	512050	4.2	75.275		33.4223	0.843801	0.0299317	no	down
ANGEL2	Protein angel homolog 2	6	6	0.00523467	0.0650132	0.696364	14357000	11113000	13949990	12173000	7468900	9580297	9438000	9433995	15.4	62.338		36.0337	-0.815619	0.0158295	no	up
ANGPTL2	Angiopoietin-related protein 2	4	4	0.457073	0.690488	1.61482	474290	5270700	972900	705013	1469411	3176202	2732901	914110	10.1	57.104		9.4131	0.96183	0.187421	no	down
ANK2	Ankyrin-2	35	18	0.186583	0.420752	1.98205	4379099	760953	4478202	3647000	8346604	4470400	5824002	3865100	11.9	433.71		118.992	-0.206901	0.528764	no	up
ANK3	Ankyrin-3	41	33	0.0895334	0.277677	1.15745	106080000	89902970	88061020	84170020	114500000	107800000	91309010	112569900	13.3	480.4		63.3208	0.664457	0.0178872	no	down
ANKFY1	Rabankyrin-5	25	25	0.0123401	0.100692	0.764131	50652010	51711010	65082000	49926000	37998010	45946000	38982980	42634000	26	128.4		73.4639	0.049949	0.907927	no	down
ANKH	Progressive ankylosis protein;Progressive ankylosis protein homolog	3	3	0.794973	0.906206	1.15398	938064	4659898	704739	800862	722975	2833101	1226899	1741001	6.5	54.297		7.93167	0.169744	0.881086	no	down
ANKHD1	Ankyrin repeat and KH domain-containing protein 1	38	26	0.203234	0.441478	1.0828	24130000	25896010	25100010	26041990	27564000	25235000	25455980	31709990	23.4	269.45
ANKLE2	Ankyrin repeat and LEM domain-containing protein 2	22	22	0.28717	0.53833	0.928136	110149900	120060000	126740100	106850000	103040000	95238980	113250000	119580000	28.5	104.11		127.623	-0.0944442	0.770104	no	up
ANKMY2	Ankyrin repeat and MYND domain-containing protein 2	4	4	0.00964011	0.088084	2.82924	6934704	6759004	5838696	2308199	17586010	11728990	15723010	12480000	11.1	49.298		7.25881	0.924455	0.293125	no	down
ANKRD11	Ankyrin repeat domain-containing protein 11	12	5	0.0103089	0.0910278	1.69309	2808799	2614901	2752002	3244400	7142000	3850798	4374498	4479001	6.5	297.91		61.004	-0.179775	0.647154	no	up
ANKRD13A	Ankyrin repeat domain-containing protein 13A	6	6	0.0405915	0.186377	0.615479	2019900	1697599	2148799	2379779	1077275	1342600	1973500	881535	11.4	67.618		18.0596	0.225738	0.745883	no	down
ANKRD17	Ankyrin repeat domain-containing protein 17	38	26	0.759136	0.885536	0.974368	38661990	41275010	48471000	44435000	35919000	39767980	45364980	47807020	21.1	274.25		242.616	-0.00251174	0.995274	no	up
ANKRD26	Ankyrin repeat domain-containing protein 26	4	4	0.288592	0.539648	1.67083	848300	379504	1800900	965301	754922	2207264	992236	2637999	3.2	196.41		22.8325	-0.035976	0.960818	no	up
ANKRD27	Ankyrin repeat domain-containing protein 27	7	7	0.629074	0.811417	0.915607	1995000	1656900	1269599	973770	1273101	1596000	1264900	1117499	8.5	116.98		60.9635	0.993839	4.12407e-05	no	down
ANKRD28	Serine/threonine-protein phosphatase 6 regulatory ankyrin repeat subunit A	12	12	0.962382	0.986154	0.996056	19255010	20232000	20778990	22785010	18029990	18561000	24326000	22300990	15.2	112.96		64.4473	-0.226937	0.545728	no	up
ANKRD32	Ankyrin repeat domain-containing protein 32	5	5	0.0122625	0.100703	2.72374	1232484	1483973	3086301	1868193	3931501	3735102	8913795	4434100	5.9	121.05
ANKRD46	Ankyrin repeat domain-containing protein 46	1	1	0.558107	0.768749	1.83828	525425	7169805	533727	1004898	419183	8214003	7869803	851506	4.8	25.222		17.81	-0.0974099	0.900463	no	up
ANKS1A	Ankyrin repeat and SAM domain-containing protein 1A	17	17	0.893858	0.95474	1.01518	17633990	20461000	21407010	23047990	18688000	19005010	19371010	27481980	20.6	123.11		81.3359	0.0824049	0.857563	no	down
ANKZF1	Ankyrin repeat and zinc finger domain-containing protein 1	16	15	0.119732	0.327534	0.883469	30591000	28448000	26442000	35410990	26577990	25536980	25469010	28717010	27	80.926		51.8309	0.109137	0.829838	no	down
ANLN	Actin-binding protein anillin	31	28	0.746936	0.880418	1.03534	46587030	53910000	71639010	48705980	53288970	53723020	62014030	56715970	29.7	124.2		147.17	-0.0806418	0.827882	no	up
ANO10	Anoctamin-10	10	10	0.612682	0.803302	1.0426	27697990	26532000	27546000	26181010	24670990	28126010	34911000	25850990	16.7	76.328		43.7051	0.329862	0.393909	no	down
ANO6	Anoctamin-6	10	10	0.741739	0.87899	0.946598	37497020	28589010	36750000	24972010	42521020	24080000	29073000	26535020	15.7	106.16		76.0042	-0.684521	0.00775189	no	up
ANP32A	Acidic leucine-rich nuclear phosphoprotein 32 family member A	11	8	0.433036	0.669017	1.10806	257940100	215740100	164910000	158099900	240630000	214550000	212609900	199259900	49.4	28.585		103.184	-0.0160057	0.969986	no	up
ANP32B	Acidic leucine-rich nuclear phosphoprotein 32 family member B	9	5	0.821473	0.921343	1.02856	216400000	261519800	178099900	173720000	171729900	214569900	221419900	240190100	40.6	28.787		53.6076	-0.491182	0.145613	no	up
ANP32E	Acidic leucine-rich nuclear phosphoprotein 32 family member E	10	10	0.496686	0.722513	1.10195	92560050	106140100	117549900	113060000	168219900	96437980	104190000	113900000	45.1	30.692		62.4758	-0.311367	0.410588	no	up
ANTXR1	Anthrax toxin receptor 1	4	4	0.783461	0.901009	1.07148	3709600	3471099	6617304	4245401	7455098	3297198	5462899	3550700	7.4	62.788		15.775	0.260588	0.726198	no	down
ANXA1	Annexin A1	17	11	0.0403111	0.18523	0.231188	27834000	30230000	77668020	81433950	3779340	6777903	18936990	31340020	50	38.714
ANXA11	Annexin A11	16	9	0.268841	0.522406	1.15773	30899020	29947020	32580000	30315010	43029020	29323990	28991020	44884020	31.7	54.389		59.7638	0.47203	0.121681	no	down
ANXA2	Annexin A2;Putative annexin A2-like protein	27	6	0.0724364	0.246007	0.486647	102229900	219570000	201420100	161540100	34727010	94716990	101820000	122310000	65.2	38.604		70.5935	-0.806899	0.00113208	no	up
ANXA3	Annexin A3	13	9	0.196995	0.434185	0.817508	46341980	45632000	41963000	47621000	34577020	33553010	29553000	55050000	41.2	36.375		10.4881	0.558763	0.467488	no	down
ANXA4	Annexin A4	9	6	0.0239364	0.143862	0.365004	4118899	4943099	5638597	9189905	1269700	1368700	2467400	4367200	32.3	35.882
ANXA5	Annexin A5	28	14	0.296589	0.545458	1.20661	256490100	238350000	265370100	256310100	333260000	351949900	190249900	394990100	78.1	35.936		85.4943	0.166789	0.648858	no	down
ANXA6	Annexin A6	42	21	0.0238796	0.143962	0.722399	277930000	319030000	259780000	228739900	166960100	241000000	174800000	204010000	66	75.872		77.3833	0.00450693	0.993666	no	down
ANXA7	Annexin A7	12	3	0.0863371	0.270899	0.671647	19672010	28437990	21087010	26509000	10456000	19726990	13797000	22361990	25	52.739		84.2966	-0.194121	0.565584	no	up
AP1B1	AP-1 complex subunit beta-1	35	5	0.393015	0.632549	0.928046	24062020	26792000	23477000	31199990	26015010	26861010	21990010	22795010	45.3	104.64		171.422	-0.223123	0.335454	no	up
AP1G1	AP-1 complex subunit gamma-1	21	20	0.0740017	0.249479	1.20697	151780000	142110100	120630000	168730000	201920000	172480100	158690000	168579900	29.6	91.349		60.9491	0.313557	0.325981	no	down
AP1G2	AP-1 complex subunit gamma-like 2	16	9	0.588246	0.789489	0.917527	28050990	15924000	24008000	24763020	16174990	23922010	22576010	21544990	24.3	87.116		58.023	-0.293812	0.50161	no	up
AP1M1	AP-1 complex subunit mu-1	18	13	0.0933154	0.283026	1.15788	29566990	39022010	30578990	30699010	34683010	40354010	35605010	39067020	50.8	48.586		30.8754	0.20573	0.702912	no	down
AP1M2	AP-1 complex subunit mu-2	21	16	0.63648	0.816324	0.954619	81679040	72313960	88323940	79678980	71055040	72913970	67882970	98154020	54.4	48.108		114.867	-0.201734	0.478321	no	up
AP1S1	AP-1 complex subunit sigma-1A	2	2	0.355034	0.603268	1.28597	4705400	2715800	3110399	1576799	4301401	4446398	2934401	3054000	15.8	18.733		17.9942	0.391306	0.574326	no	down
AP1S2	AP-1 complex subunit sigma-2	4	4	0.0423031	0.189332	1.33437	22984000	20590000	25335990	22350990	37760980	25910020	24977990	34766010	22.3	18.615		106.752	0.0179999	0.963695	no	down
AP2A1	AP-2 complex subunit alpha-1	40	33	0.00154614	0.0436977	0.785824	307980000	323760000	351980100	298950000	254790100	250020000	266649900	235540100	49.8	107.54		203.037	-0.114657	0.689416	no	up
AP2A2	AP-2 complex subunit alpha-2	30	9	0.39147	0.630738	1.14936	13904000	12505000	17740010	21546990	16977000	16384990	17391000	23975010	36.5	103.96
AP2B1	AP-2 complex subunit beta	37	23	0.139526	0.353772	0.9245	556989800	517250200	592400000	636740400	525819900	514550000	546089700	537309800	51	104.58		288.737	0.02345	0.939224	no	down
AP2M1	AP-2 complex subunit mu	18	18	0.100209	0.294326	0.867241	227090100	271619800	261559900	234770000	180060000	230700000	229819900	224429900	42.5	49.654		347.417	-0.586559	1.42249e-05	no	up
AP2S1	AP-2 complex subunit sigma	5	5	0.0425258	0.18958	2.27676	24827990	20047990	9466404	12270000	68718030	34181000	24960990	26497020	35.9	17.018		62.8256	-0.269367	0.455236	no	up
AP3B1	AP-3 complex subunit beta-1	38	14	0.0963697	0.288755	1.09822	69788970	66460960	60178020	65671990	69432990	76619980	65966020	75979040	39.1	121.32		80.4058	0.0217119	0.962483	no	down
AP3D1	AP-3 complex subunit delta-1	32	32	0.034721	0.172209	0.869538	206560100	208620100	185110100	219120000	186760000	189399900	160900000	175569900	39.2	130.16		296.927	-0.468119	0.00384205	no	up
AP3M1	AP-3 complex subunit mu-1	13	9	0.793024	0.905898	0.957575	39162020	48959000	46993010	70109960	42722980	42793020	44835980	64794990	40.7	46.939		32.866	0.142065	0.800516	no	down
AP3M2	AP-3 complex subunit mu-2	9	5	0.640633	0.819312	1.1346	1805699	2270100	2534299	2826699	2045175	1860901	2410599	5304198	24.2	46.977		10.0226	0.0750724	0.943338	no	down
AP3S1	AP-3 complex subunit sigma-1	5	5	0.752775	0.88325	0.98553	29366010	32190000	33660000	33377980	34531020	31718000	30156990	30333010	27.5	21.732		16.398	0.527051	0.383572	no	down
AP3S2	AP-3 complex subunit sigma-2	5	5	0.0607341	0.221927	0.835383	10434000	10316000	9310805	9363405	8733996	6942602	7785205	9680997	25.4	22.017
AP4B1	AP-4 complex subunit beta-1	6	6	0.00973459	0.0889448	0.564604	1626818	2468689	1844500	2171701	1114033	1003300	913107	1601801	12.7	83.259		17.652	-0.671925	0.227745	no	up
AP4E1	AP-4 complex subunit epsilon-1	9	4	0.0744887	0.249971	0.617859	2532500	2844401	1844200	1657899	1638599	1510901	775713	1671299	10.8	127.29		21.6812	-0.029325	0.968536	no	up
AP4M1	AP-4 complex subunit mu-1	5	5	0.386308	0.626406	1.11828	2141901	3487899	2243599	3078501	2916702	3056800	2974601	3042700	12.1	49.976		13.8931	0.0723552	0.936484	no	down
AP5B1	AP-5 complex subunit beta-1	6	6	0.128544	0.341981	2.11717	1645701	1789501	960734	309300	1375301	2327000	2427700	2263100	10.7	93.948		37.219	1.23061	0.000460042	yes	down
AP5M1	AP-5 complex subunit mu-1	2	2	0.864965	0.94238	0.956038	1200200	865990	1185300	798002	1268500	500167	936210	1382673	6.1	54.766		40.269	-0.612679	0.0861642	no	up
AP5Z1	AP-5 complex subunit zeta-1	5	4	0.449972	0.683705	1.30302	2656299	1928400	3127301	4472102	2770199	2060100	6708598	5394302	8.6	88.604		36.0431	-0.258364	0.639474	no	up
APAF1	Apoptotic protease-activating factor 1	2	2	0.235197	0.480773	3.7361	1653900	1220101	275584	1735300	2293965	1280100	1203798	53189020	1.8	141.84		20.0276	-0.0460685	0.952112	no	up
APBA2	Amyloid beta A4 precursor protein-binding family A member 2	3	2	0.51474	0.738025	1.28577	759858	1424300	1036201	1327170	2941933	1729201	590912	1353199	5.5	82.511
APBA3	Amyloid beta A4 precursor protein-binding family A member 3	3	3	0.748665	0.881632	1.27574	3728599	764010	551059	614000	3537501	3041300	335724	706851	7.1	61.453		30.8048	-0.344596	0.513732	no	up
APBB1	Amyloid beta A4 precursor protein-binding family B member 1	7	2	0.940528	0.978591	0.981727	3019801	4675999	2746600	1763101	2083299	3495202	2512302	3472100	16.8	77.243		39.4638	0.725771	0.0336771	no	down
APBB2	Amyloid beta A4 precursor protein-binding family B member 2	2	2	0.557784	0.768544	0.895669	1154200	1102001	1271501	1080301	635570	1410100	1021900	1227699	3.6	83.373		41.5842	0.372197	0.35688	no	down
APC	Adenomatous polyposis coli protein	21	20	0.549546	0.7629	1.07304	8513598	9144396	8269399	6946798	9972496	7830200	10617990	7151004	11.5	311.64		117.874	-0.385461	0.201129	no	up
APEH	Acylamino-acid-releasing enzyme	17	17	0.934459	0.975885	1.00294	288850000	266300100	272880000	292500000	302609900	277700000	269000000	274810000	33.7	81.224		183.055	0.0846201	0.765702	no	down
APEX1	DNA-(apurinic or apyrimidinic site) lyase;DNA-(apurinic or apyrimidinic site) lyase, mitochondrial	19	11	0.834255	0.927076	0.96111	412620200	380489800	254720100	467340300	398810200	328050100	261189900	466680300	58.5	35.554		332.965	-0.0689457	0.795857	no	up
APEX2	DNA-(apurinic or apyrimidinic site) lyase 2	1	1	0.694756	0.852691	0.817683	1776599	2101262	712420	3195201	2344605	467716	2123400	1631401	4.4	57.4		46.6327	-0.184378	0.68865	no	up
APH1A	Gamma-secretase subunit APH-1A	2	2	0.741728	0.879115	1.05548	4061102	2453400	4527799	4069798	3462299	3605502	4824399	3783599	5.3	28.996		61.066	-0.183901	0.66291	no	up
APH1B	Gamma-secretase subunit APH-1B	1	1	0.690379	0.849473	1.08416	1503600	1493900	1915500	1101499	2542050	1411999	1275046	1430700	4.7	28.46		8.01526	0.595321	0.538763	no	down
API5	Apoptosis inhibitor 5	26	26	0.038278	0.180544	1.25595	285859800	303419900	398939900	287939900	364140100	416380000	422850100	386680200	51.7	59.004		113.585	0.295956	0.24192	no	down
APIP	Methylthioribulose-1-phosphate dehydratase	3	3	0.509699	0.734856	0.95295	7267001	6625901	5559798	6160097	5706202	6049503	5806097	6785399	17.8	27.125		14.1882	0.238028	0.77381	no	down
APITD1	Centromere protein S	3	3	0.185002	0.419289	0.72871	745620	968390	1105015	1342999	1175023	513895	732713	682930	23.2	15.893
APLP2	Amyloid-like protein 2	17	16	0.0928066	0.281968	1.5242	14753000	27435010	26207990	15203000	21349010	31235980	38569990	33840000	25.8	86.955		434.693	0.187012	0.267765	no	down
APMAP	Adipocyte plasma membrane-associated protein	17	17	0.318277	0.568539	0.914165	250660100	220590100	310560000	255440100	218950000	238310000	264009900	222380100	46.9	46.48		56.3496	-0.150825	0.720571	no	up
APOA1BP	NAD(P)H-hydrate epimerase	5	4	0.0160938	0.1179	1.39234	42655020	28191010	35410990	33300010	53516020	48464020	41770000	49189970	23.6	31.674
APOBEC3B	DNA dC->dU-editing enzyme APOBEC-3B;DNA dC->dU-editing enzyme APOBEC-3D	2	2	0.577333	0.782234	1.18583	883829	1539900	1149999	858806	1875716	1525334	1544500	601492	5.5	45.924
APOC3	Apolipoprotein C-III	1	1	0.102066	0.296824	1.79535	783284	642130	1500500	584710	2243403	2012247	979850	1036499	16.2	10.852
APOE	Apolipoprotein E	24	19	0.661728	0.832323	1.12653	206459900	210489900	215080000	109790000	224959900	189010000	319919900	121500000	71.3	36.154		651.9	0.59682	0.00108201	no	down
APOL2	Apolipoprotein L2	5	5	0.430998	0.668252	1.10323	5032501	3443100	5729099	4205899	5280500	5035603	5176101	4493800	15.4	37.092		8.77495	0.337253	0.724388	no	down
APOO	Apolipoprotein O	5	5	0.6874	0.846911	0.851725	24184990	79940020	16668990	21842990	22810000	19131000	38574990	22006990	26.8	22.284		16.5172	-0.143879	0.86164	no	up
APOOL	MICOS complex subunit MIC27	8	8	0.015145	0.114085	0.677572	19250990	16848010	14428000	12236000	11464000	11495010	10359010	8841099	38.8	29.159		4.57087	-0.965057	0.419844	no	up
APP	Amyloid beta A4 protein;N-APP;Soluble APP-alpha;Soluble APP-beta;C99;Beta-amyloid protein 42;Beta-amyloid protein 40;C83;P3(42);P3(40);C80;Gamma-secretase C-terminal fragment 59;Gamma-secretase C-terminal fragment 57;Gamma-secretase C-terminal fragment 50;C31	22	21	0.0970055	0.290094	0.822255	137570000	148640000	115970000	115879900	85153980	107530000	112070000	122409900	37.9	86.942		799.311	-0.0460489	0.829425	no	up
APPL1	DCC-interacting protein 13-alpha	17	16	0.0225883	0.140324	0.745071	43768990	54662000	51139980	58369980	32995000	38984990	36452020	46938000	35.7	79.663		41.0495	-0.542676	0.168942	no	up
APPL2	DCC-interacting protein 13-beta	3	2	0.969741	0.987889	1.01658	1467701	680800	3690742	763815	1796501	1606600	1077899	966980	7.4	74.493		13.9299	1.06173	0.0507676	no	down
APRT	Adenine phosphoribosyltransferase	12	8	0.0155775	0.116954	1.27464	185090000	213660100	164820000	189480100	268159800	243269900	210870100	236990100	68.9	19.608		112.241	0.025854	0.94431	no	down
APTX	Aprataxin	8	8	0.113066	0.314834	0.682197	16095000	17793000	16181000	14938000	11325000	6200403	13953990	15301000	25	40.74		23.3291	-0.227585	0.724321	no	up
AQR	Intron-binding protein aquarius	39	39	0.327286	0.575261	0.928884	121690000	144489900	154250000	134640000	137590000	115570000	140330100	121830000	31.2	171.29		152.406	0.118103	0.693109	no	down
ARAF	Serine/threonine-protein kinase A-Raf	9	6	0.600304	0.79663	1.07406	5107600	4468598	4299701	7051004	6364400	4662301	5579901	5561599	16.3	67.585		38.9448	-0.0988737	0.867541	no	up
ARAP1	Arf-GAP with Rho-GAP domain, ANK repeat and PH domain-containing protein 1	32	32	0.0659836	0.232117	0.852182	53449980	49357000	49501020	51466980	38619020	40867980	42471020	52880020	26.1	162.19		108.452	-0.103784	0.800151	no	up
ARAP3	Arf-GAP with Rho-GAP domain, ANK repeat and PH domain-containing protein 3	26	15	0.194191	0.431554	1.06706	16258010	16443000	17512990	16708990	16092000	18761010	19345000	17365000	21.3	169.84		106.751	0.410813	0.0950063	no	down
ARCN1	Coatomer subunit delta	27	27	0.57493	0.780219	0.956649	202669900	209440000	198519900	248250000	182850000	205629900	196559900	237070000	50.3	57.21		106.912	-0.213002	0.492992	no	up
ARF1	ADP-ribosylation factor 1;ADP-ribosylation factor 3;ADP-ribosylation factor 2	12	8	0.177536	0.411224	0.645858	146539900	336050000	245860100	449150100	151869900	125810000	190090000	260520100	68	20.697		159.318	-0.101951	0.738182	no	up
ARF4	ADP-ribosylation factor 4	9	3	0.0442661	0.193722	0.891985	285729800	287680000	270740000	281860100	248380000	276170000	224720000	257600000	55.6	20.511		42.3128	-0.12457	0.807224	no	up
ARF5	ADP-ribosylation factor 5	10	6	0.458311	0.691727	0.870804	97346060	71329970	77128050	89291980	103120000	48882030	82867020	65830020	55.6	20.529		55.9896	0.0630555	0.895005	no	down
ARF6	ADP-ribosylation factor 6	4	4	0.216616	0.459775	0.803088	78944990	112470000	93186980	94149060	49543980	82400960	88468040	89717030	33.1	20.082		71.9426	-0.393953	0.168308	no	up
ARFGAP1	ADP-ribosylation factor GTPase-activating protein 1	10	10	0.154789	0.377098	0.878744	46398020	38383000	37832990	40218990	34632010	30610010	41762980	36497010	34.5	44.667		36.5985	0.0515083	0.931826	no	down
ARFGAP2	ADP-ribosylation factor GTPase-activating protein 2	16	16	0.683509	0.84437	0.945567	40953980	49787980	51041030	64620980	41658980	40622020	55194000	57559970	32.4	56.72		45.6858	0.0912042	0.863751	no	down
ARFGAP3	ADP-ribosylation factor GTPase-activating protein 3	11	9	0.0301583	0.160757	0.493724	10302990	7679300	7345804	9055704	5433403	4720298	2088599	5838303	25.8	56.928		10.8424	0.171454	0.858058	no	down
ARFGEF1	Brefeldin A-inhibited guanine nucleotide-exchange protein 1	52	43	0.595237	0.793824	0.951932	124239900	140700000	161170000	163210000	132930000	125600000	136630000	165520100	35.3	208.76		219.892	-0.159272	0.548427	no	up
ARFGEF2	Brefeldin A-inhibited guanine nucleotide-exchange protein 2	28	8	0.333906	0.582826	0.612413	2476901	3684701	3316500	6458802	922211	3937498	1385123	5467400	19.2	202.04		91.147	-0.7336	0.000490109	no	up
ARFGEF3	Brefeldin A-inhibited guanine nucleotide-exchange protein 3	12	12	0.95825	0.985661	1.0292	2339700	1200200	2258599	8109703	3145999	1238400	2291600	6463902	8.5	240.65		92.5068	-0.0900464	0.817654	no	up
ARFIP1	Arfaptin-1	15	15	0.166038	0.395653	1.14901	39014020	46083000	46016030	57789030	59137020	49940000	52513010	53732960	52	41.738		16.3333	-0.031468	0.970551	no	up
ARFIP2	Arfaptin-2	10	10	0.973088	0.989076	0.995084	19492010	19701990	28875990	26754020	18625990	21429010	25145010	28984000	28.4	37.855		41.917	-0.215387	0.638065	no	up
ARG1	Arginase-1	2	2	0.242777	0.490461	1.23146	831420	899837	725790	1189009	1395101	871160	1331001	917882	6.8	34.735
ARG2	Arginase-2, mitochondrial	10	10	0.184092	0.418691	1.19786	34576010	26767990	26488990	23794980	42465010	33728020	29154990	28762980	35.6	38.577		43.3457	0.606768	0.0794539	no	down
ARGLU1	Arginine and glutamate-rich protein 1	7	7	0.871418	0.945898	0.936973	43693020	80644980	53346980	104010000	122219900	62441990	78162050	25262000	20.3	32.887		122.412	0.311555	0.229452	no	down
ARHGAP1	Rho GTPase-activating protein 1	16	16	0.101755	0.296503	1.18226	110270000	128699900	127110100	122089900	114820000	149420000	150820000	166290000	46.7	50.435		35.7777	-0.21629	0.658421	no	up
ARHGAP10	Rho GTPase-activating protein 10	3	2	0.979048	0.991735	1.01018	2713148	854840	874690	562567	1136037	1370400	674261	1132200	5.1	89.374		5.81827	0.444731	0.698689	no	down
ARHGAP11A	Rho GTPase-activating protein 11A	15	15	0.504445	0.730269	1.21387	5196500	8438195	9708105	3227199	7097600	6542700	10162010	6320604	20.2	113.86		5.73449	-1.14132	0.235314	no	up
ARHGAP12	Rho GTPase-activating protein 12	22	22	0.0445943	0.194917	1.16528	26886990	26556000	29542020	29814990	29576020	32880000	31517980	37832990	31.2	96.253		51.7373	0.108591	0.813768	no	down
ARHGAP17	Rho GTPase-activating protein 17	14	13	0.764631	0.888579	1.03733	15296010	19200990	21334000	20049000	16867000	16823990	20845990	24589000	27.2	95.436		65.2385	-0.148062	0.722843	no	up
ARHGAP18	Rho GTPase-activating protein 18	13	7	0.696035	0.853339	1.08464	3403099	2152601	2092701	1690799	1775378	3221099	2208499	2840500	22.6	74.976		9.22909	0.706419	0.383732	no	down
ARHGAP19	Rho GTPase-activating protein 19	11	11	0.391214	0.630548	1.12157	14853000	21076000	19877000	15934010	15188000	21925990	22382010	21048990	29.4	55.756
ARHGAP21	Rho GTPase-activating protein 21	16	10	0.181131	0.415362	1.59881	1483801	4131700	4497699	2278300	2968398	6370604	5336900	4067302	11	217.46		123.349	-0.111337	0.71525	no	up
ARHGAP23	Rho GTPase-activating protein 23	8	8	0.2766	0.529809	0.797439	2710800	1675401	2393799	2571101	1562200	2618600	1306400	2115101	7.5	162.19		18.2256	-0.0912045	0.971271	no	up
ARHGAP26	Rho GTPase-activating protein 26	5	5	0.0332331	0.168837	1.79377	519612	822480	1328800	934815	1480399	1923600	1266100	1524400	7.7	92.234		13.0429	0.215274	0.809418	no	down
ARHGAP28	Rho GTPase-activating protein 28	5	5	0.776399	0.895473	0.926416	1362500	1544000	2189500	2730940	1087263	2049200	1497299	2777401	6.9	82.059		3.33512	-0.869091	0.562501	no	up
ARHGAP32	Rho GTPase-activating protein 32	13	12	0.0209321	0.134733	2.13781	2585199	3162099	1876800	2600202	5195799	5944399	8833703	3054000	8	230.53		80.5895	0.0657212	0.874205	no	down
ARHGAP35	Rho GTPase-activating protein 35	27	6	0.172734	0.403771	1.89847	1257977	3732999	4823302	8974598	7839605	6700001	6286103	7997502	24.5	170.51		208.996	-0.438025	0.0150461	no	up
ARHGAP39	Rho GTPase-activating protein 39	6	6	0.167905	0.39864	0.693099	1963800	3796899	3060702	2174600	1124264	2225202	1819601	2515901	7	121.28		40.3154	-0.22626	0.639474	no	up
ARHGAP4	Rho GTPase-activating protein 4	16	16	0.00243893	0.0497647	0.431481	18576000	24028990	28375990	24072010	7029401	9992398	10657010	14118000	22.7	105.02		51.9735	-0.963447	0.000880578	no	up
ARHGAP42	Rho GTPase-activating protein 42	4	4	0.0277877	0.15506	2.1987	607237	632467	831615	381241	1068021	800066	2214700	1503701	6.5	98.568		32.1288	0.368369	0.414927	no	down
ARHGAP5	Rho GTPase-activating protein 5	15	15	0.22459	0.468344	1.23248	4693403	4688999	6046497	5521699	4368003	6441900	7056796	8538204	13.6	172.46		106.851	0.393831	0.123238	no	down
ARHGAP8	Rho GTPase-activating protein 8	11	11	0.474733	0.704395	1.13489	8475796	17363000	10999000	10789000	15582000	11149010	13591000	12270000	27.2	53.483
ARHGDIA	Rho GDP-dissociation inhibitor 1	8	1	0.53839	0.754464	1.06095	178580000	160480000	141100100	195720000	174930000	195559900	152440000	192290100	41.7	23.207		108.022	-0.494089	0.0376416	no	up
ARHGEF1	Rho guanine nucleotide exchange factor 1	21	21	0.425468	0.662201	0.903191	30896000	35770000	29209000	36332990	23729010	31164000	27071000	38987000	26.9	102.43		47.9127	-0.0987336	0.851149	no	up
ARHGEF10	Rho guanine nucleotide exchange factor 10	24	19	0.546755	0.760786	0.95542	39175020	41237970	37720020	37268000	41399010	31544990	34872990	41551010	26.7	151.61
ARHGEF10L	Rho guanine nucleotide exchange factor 10-like protein	6	5	0.59755	0.794738	1.25306	1341500	2246499	497545	2643093	2571400	1595001	1263900	1884899	5.3	140.38		73.4366	0.182562	0.626898	no	down
ARHGEF11	Rho guanine nucleotide exchange factor 11	13	13	0.0334684	0.16935	1.40478	3095700	3536000	3599901	4074999	5937401	3674602	4952302	5787704	12	167.7		65.0906	-0.052089	0.91008	no	up
ARHGEF12	Rho guanine nucleotide exchange factor 12	15	15	0.00161319	0.0433966	1.63039	6763903	5169898	5722097	5481999	11064000	9739305	9041397	7955405	13.8	173.23		83.8654	-0.48824	0.068715	no	up
ARHGEF16	Rho guanine nucleotide exchange factor 16	17	17	0.273893	0.528068	0.835342	46807980	28717990	35632000	36955020	28164000	26494000	27230980	42416980	32.2	80.104		52.3485	-0.504707	0.101709	no	up
ARHGEF18	Rho guanine nucleotide exchange factor 18	15	15	0.147365	0.366401	1.23945	26280990	21502000	21001010	24790010	40284980	23347990	26593980	27757010	16.2	151.64
ARHGEF2	Rho guanine nucleotide exchange factor 2	26	26	0.152711	0.374169	0.888662	131060000	128590100	152460000	159990000	125410000	113380100	126210000	142860000	32.9	111.54		73.3479	-0.108212	0.785275	no	up
ARHGEF35	Rho guanine nucleotide exchange factor 35	9	2	0.187114	0.421471	1.55383	851799	380030	885730	447950	1288602	1246101	545840	854200	22.1	53.286		8.62043	-1.07991	0.146198	no	up
ARHGEF39	Rho guanine nucleotide exchange factor 39	5	5	0.458048	0.691654	1.52465	3972699	1694700	4667402	484269	3231302	3551902	3377202	2121399	16.4	38.295		17.9399	0.808971	0.109236	no	down
ARHGEF40	Rho guanine nucleotide exchange factor 40	25	25	7.52004e-06	0.00866667	2.10146	15272000	14991000	17274000	14599000	35448980	30028010	31456990	33626020	21.2	164.66		142.2	0.789118	0.000180211	no	down
ARHGEF5	Rho guanine nucleotide exchange factor 5	19	12	0.932099	0.975166	1.02949	5931101	2320300	2170900	5432699	6021703	3045799	3902300	2547299	14.5	176.8		140.562	-0.342128	0.113532	no	up
ARHGEF7	Rho guanine nucleotide exchange factor 7	13	6	0.367493	0.613061	0.453851	6320002	9657501	1034700	12931000	9481798	625487	3644802	1602875	21	90.011		45.9437	-0.197836	0.650751	no	up
ARHGEF9	Rho guanine nucleotide exchange factor 9	3	2	0.133644	0.345859	0.535626	885920	1065501	1962699	2062900	924736	347798	1378100	709740	6	60.926		22.5664	0.885097	0.1046	no	down
ARID1A	AT-rich interactive domain-containing protein 1A	54	51	0.000284627	0.0287719	1.92335	122960000	155420000	170690000	154460000	301670000	254889900	323730000	276990100	36.9	242.04		418.351	0.266228	0.110303	no	down
ARID1B	AT-rich interactive domain-containing protein 1B	32	29	0.202073	0.439632	1.12385	43872980	46168010	57515020	50158020	57384000	51412020	63613040	49668980	21.2	236.12		275.921	-0.153289	0.498328	no	up
ARID2	AT-rich interactive domain-containing protein 2	29	29	0.00247096	0.0491029	1.4376	57252980	74219950	76181010	69062030	104500000	92477980	104969900	94132010	24	197.39		131.511	0.497749	0.0368251	no	down
ARID3A	AT-rich interactive domain-containing protein 3A	18	16	0.057473	0.21618	1.27406	25882010	33726020	32593010	29934980	42688030	31613000	36056020	46117980	36.9	62.888		91.6753	-0.139619	0.709056	no	up
ARID3B	AT-rich interactive domain-containing protein 3B	29	28	0.538034	0.754186	1.03831	314730100	309540100	385769700	302190100	343479800	337739800	346820000	328080000	61.1	60.636		155.414	-0.236329	0.35339	no	up
ARID4A	AT-rich interactive domain-containing protein 4A	11	11	0.622981	0.807324	1.24166	2113401	10291000	3737601	3025399	5485297	4560697	8714699	2681301	11.6	142.75		14.3359	-0.242107	0.81026	no	up
ARID4B	AT-rich interactive domain-containing protein 4B	17	7	0.700801	0.856466	0.918156	2352402	2763399	4545402	4974501	2759401	2896098	2994199	4365503	17.7	147.81		59.8593	-0.245187	0.526953	no	up
ARIH1	E3 ubiquitin-protein ligase ARIH1	5	5	0.916345	0.966716	1.02223	7832001	9461299	5563099	5956900	4848402	8724002	6457197	9817297	12.6	64.016		48.3663	-0.146276	0.744842	no	up
ARIH2	E3 ubiquitin-protein ligase ARIH2	9	9	0.265605	0.518573	1.18956	7525904	11688000	9370302	9866102	8318996	11951990	11798000	13881000	23.1	57.818		79.9881	-0.561668	0.0431174	no	up
ARL1	ADP-ribosylation factor-like protein 1	9	9	0.0863407	0.270752	0.641072	61977960	91720010	106900000	97115960	36198020	54644000	57461960	87697940	68.5	20.417		19.4215	0.00683091	0.994754	no	down
ARL13B	ADP-ribosylation factor-like protein 13B	3	3	0.547324	0.761481	0.755168	1469000	1821900	1644300	355180	1162688	1231000	498150	712965	7.7	48.643		4.09291	-0.584988	0.666153	no	up
ARL14EP	ARL14 effector protein	4	4	0.213056	0.455149	0.457126	2976698	4647101	4227702	6215496	5722203	468870	1735901	3408002	13.8	29.337		17.1177	-0.148851	0.850568	no	up
ARL15	ADP-ribosylation factor-like protein 15	4	4	0.369892	0.614516	1.31073	6423904	6055497	5550199	6510903	9840206	13676990	8295296	3716399	21.1	22.876		5.97121	0.861572	0.437821	no	down
ARL2	ADP-ribosylation factor-like protein 2	8	8	0.241086	0.488083	1.19278	61241960	45213020	55242030	45565980	69559970	74726020	44806000	60576020	50.5	20.878		23.5734	0.550409	0.302076	no	down
ARL3	ADP-ribosylation factor-like protein 3	9	9	0.661471	0.832404	1.04904	74799960	99819000	69888960	69617010	94114960	81813050	70377050	81187030	58.8	20.455		29.032	0.494992	0.26571	no	down
ARL5B	ADP-ribosylation factor-like protein 5B	3	2	0.897279	0.957326	0.973561	7455699	9844695	7443496	7866797	5934897	11489990	5505299	10285000	15.6	20.374		14.2719	0.113031	0.894261	no	down
ARL6	ADP-ribosylation factor-like protein 6	2	2	0.275805	0.528884	0.71325	1950600	902822	752890	740890	669965	1012296	464240	807460	11.3	20.959
ARL6IP1	ADP-ribosylation factor-like protein 6-interacting protein 1	4	4	0.531417	0.749087	1.6367	2722501	3113201	3690303	879807	18644000	855520	6021201	2056101	27.6	23.362		14.5264	0.217808	0.793422	no	down
ARL6IP4	ADP-ribosylation factor-like protein 6-interacting protein 4	4	4	0.721389	0.868268	1.07935	9296402	12685000	11004990	16614010	17213000	13508000	8203802	15341010	11.6	44.915		135.76	0.196127	0.462098	no	down
ARL6IP5	PRA1 family protein 3	4	3	0.0446827	0.194867	0.63544	31903000	29982000	35056000	28880000	21450010	25779010	23856000	11969010	20.2	21.614		26.5001	-0.270482	0.614661	no	up
ARL6IP6	ADP-ribosylation factor-like protein 6-interacting protein 6	3	3	0.644642	0.822649	1.43542	491580	4935700	4048900	3970399	791263	6133799	6878103	4960303	22.6	24.676		35.3567	0.640781	0.102263	no	down
ARL8A	ADP-ribosylation factor-like protein 8A	9	2	0.582302	0.785195	0.845834	12907990	9920894	6499800	18497990	14624000	9507506	9613704	5895904	59.1	21.416		12.9081	-0.657364	0.311036	no	up
ARL8B	ADP-ribosylation factor-like protein 8B	8	4	0.577851	0.782748	1.17149	12745990	23604010	14090010	23898990	35287990	22291000	12677010	19135000	51.6	21.539		13.0142	0.0254725	0.977355	no	down
ARMC1	Armadillo repeat-containing protein 1	11	11	0.984073	0.994185	0.996148	39870000	39661020	48965020	21747000	32038000	41462000	32896000	37942990	56	31.28		30.5928	-0.276624	0.576665	no	up
ARMC10	Armadillo repeat-containing protein 10	9	9	0.0140316	0.109914	1.47598	27619990	26602990	30855010	26051010	52479980	45497000	35271010	33283990	37.3	37.54		15.0021	0.397683	0.80097	no	down
ARMC6	Armadillo repeat-containing protein 6	13	13	0.0938918	0.283977	0.65084	24129010	40726020	49172020	41218020	19560000	22965010	20868000	38124010	31.1	54.141		109.238	-0.315585	0.263201	no	up
ARMC8	Armadillo repeat-containing protein 8	14	14	0.150396	0.370797	0.791733	20297990	28963010	32334980	33606020	20083990	19240000	23425010	27731010	26.2	75.509		30.3217	-0.222418	0.684296	no	up
ARMC9	LisH domain-containing protein ARMC9	13	4	0.909944	0.963405	1.02722	5015298	3202399	6498399	6734404	5578300	4038700	4401102	7892799	17.1	91.818		25.1726	0.37375	0.47665	no	down
ARMCX1	Armadillo repeat-containing X-linked protein 1	13	7	0.66613	0.834325	0.838497	33202990	25078010	36522980	14863000	25763000	27471010	38003990	8307105	36	49.18		32.1026	0.23999	0.634113	no	down
ARMCX2	Armadillo repeat-containing X-linked protein 2	18	18	0.0953535	0.287087	0.816495	88929950	87234020	111540000	131360000	77911970	83220980	90130040	86444030	46.7	65.683		101.089	0.25701	0.407944	no	down
ARMCX3	Armadillo repeat-containing X-linked protein 3	10	10	0.810313	0.91686	0.974609	14834010	12063010	14662000	16257000	17324000	14173000	11735000	13356000	32.5	42.5		15.9052	0.0118904	0.990014	no	down
ARMCX4	Armadillo repeat-containing X-linked protein 4	17	17	0.00883739	0.0835345	0.389704	5635102	6409499	7452999	13262000	3608001	3240902	1882999	3739598	11.7	235.96		35.8829	-0.162955	0.761216	no	up
ARMT1	Protein-glutamate O-methyltransferase	18	18	0.0173891	0.12147	0.678322	188380000	240349900	161439900	206980000	115440000	158439900	115600100	151489900	41.7	51.172		140.333	-1.02481	5.86138e-08	yes	up
ARNT	Aryl hydrocarbon receptor nuclear translocator	7	7	0.881722	0.949601	0.926346	714728	3344301	3137501	6402097	2247901	1683699	3783399	2468999	20.4	86.636		29.7921	0.0708359	0.913165	no	down
ARPC1A	Actin-related protein 2/3 complex subunit 1A	13	12	0.188783	0.424177	0.788113	74349000	101140000	109779900	149630000	71686010	89519990	75975020	97738990	43.2	41.569		6.50576	0.0712927	0.956789	no	down
ARPC1B	Actin-related protein 2/3 complex subunit 1B	12	2	0.84438	0.932005	1.03083	26705000	37913000	34205010	20380010	27350990	27343000	31686980	33630020	30.1	40.949
ARPC2	Actin-related protein 2/3 complex subunit 2	17	17	0.191503	0.428611	0.887416	349959800	408309900	354720000	305310000	293759900	367430000	288339900	308369900	68	34.333		112.582	-0.304281	0.254414	no	up
ARPC3	Actin-related protein 2/3 complex subunit 3	6	2	0.312562	0.561634	0.814093	28165000	53350020	29611000	43920980	25711010	41291000	28605000	28265010	45.5	20.546		77.4074	-0.145848	0.711295	no	up
ARPC4	Actin-related protein 2/3 complex subunit 4	7	7	0.223449	0.467717	0.908326	429390000	373810000	413450200	467130200	350789900	384460200	353830000	442219700	42.9	19.667		20.6469	0.14654	0.833741	no	down
ARPC5	Actin-related protein 2/3 complex subunit 5	6	1	0.290425	0.541073	1.08177	21794010	27516990	25133010	21990990	27905000	23318010	26562010	26261990	46.4	16.32		33.502	0.0131009	0.981692	no	down
ARPC5L	Actin-related protein 2/3 complex subunit 5-like protein	8	7	0.167928	0.398584	0.870093	58444030	74212980	63486000	59155010	57950000	61919000	45102990	57685980	63.4	16.941		30.559	-0.831681	0.0357582	no	up
ARPP19	cAMP-regulated phosphoprotein 19	5	4	0.80373	0.912307	0.943348	2468199	1979599	3045602	1672599	3176399	2562001	1448899	1671699	47.3	12.293		39.3369	0.00477839	0.995274	no	down
ARRB1	Beta-arrestin-1	13	13	0.00919493	0.0862039	0.276645	59140000	76093030	70947000	61890020	6813797	28589010	22937010	25902990	38.8	47.065		49.6949	-0.874384	0.00282956	no	up
ARRB2	Beta-arrestin-2	5	5	0.177744	0.411465	0.459576	7680600	10362010	11517990	12318000	1063045	7409202	8151895	7845204	15.2	46.105		22.7311	0.836341	0.055844	no	down
ARSA	Arylsulfatase A;Arylsulfatase A component B;Arylsulfatase A component C	4	4	0.0990951	0.291572	1.68251	1721805	887770	1732599	2304400	4095101	2970699	1898399	2117700	13.4	53.588		9.23612	0.71658	0.388487	no	down
ARSB	Arylsulfatase B	8	8	0.0842164	0.267927	1.28283	6276296	5040198	5694800	6467099	9968001	7809801	6352799	6379800	15.4	59.687		20.2005	0.535544	0.306995	no	down
ARSE	Arylsulfatase E	11	11	0.754621	0.883782	1.05897	52145990	52952010	67516980	48469980	37146000	69654020	76070000	57736030	26.1	65.668		45.1371	-0.374061	0.324593	no	up
ARSK	Arylsulfatase K	4	4	0.356238	0.604029	1.78637	558946	3835500	3178202	3375600	1340004	6062297	5341898	5397198	10.4	61.45		10.4709	-0.150026	0.882909	no	up
ART5	Ecto-ADP-ribosyltransferase 5	3	3	0.862744	0.941029	0.920286	2126400	2049901	1957400	614117	1985601	1959168	1972801	489726	13.1	32.053		5.09557	1.53	0.126375	no	down
ARVCF	Armadillo repeat protein deleted in velo-cardio-facial syndrome	19	19	0.199069	0.435866	1.16949	24549990	27635990	33020010	36106010	34434000	33522990	42160020	31091000	28.4	104.64		72.8501	0.551148	0.0471045	no	down
AS3MT	Arsenite methyltransferase	7	6	0.0137944	0.109246	1.71829	8094001	7604296	4708300	7217796	13742010	13689010	9330805	10388000	17.3	41.747		9.47694	1.06482	0.16331	no	down
ASAH1	Acid ceramidase;Acid ceramidase subunit alpha;Acid ceramidase subunit beta	10	8	0.142703	0.358823	0.732849	28054000	51040020	47651980	36799980	20185010	34733990	31990980	32291020	31.9	44.659		10.9976	0.725693	0.29144	no	down
ASAP1	Arf-GAP with SH3 domain, ANK repeat and PH domain-containing protein 1	10	8	0.386695	0.626979	0.847826	828270	827934	1152464	965810	985870	1076700	676607	549114	10	125.5		36.754	-0.517042	0.194847	no	up
ASAP3	Arf-GAP with SH3 domain, ANK repeat and PH domain-containing protein 3	9	9	0.343748	0.591507	1.09986	7228396	5655103	7040004	6810600	6273500	7038198	8951704	7256297	15.2	99.154		56.3174	0.71903	0.00783205	no	down
ASB6	Ankyrin repeat and SOCS box protein 6	3	3	0.066787	0.233885	0.812843	734358	957611	1065101	1035200	707300	799812	724450	825921	9	47.135		23.8304	-0.157258	0.827986	no	up
ASCC1	Activating signal cointegrator 1 complex subunit 1	9	9	0.0488797	0.200815	0.740648	35624980	26997010	40339020	35352990	21311000	24614990	24316990	32356020	21.5	45.509		23.9167	0.00405841	0.996924	no	down
ASCC2	Activating signal cointegrator 1 complex subunit 2	18	18	0.38878	0.628538	0.903702	21152010	25465000	24382990	20840010	15499000	23504990	22520000	22251010	29.3	86.359		47.1684	-0.322775	0.438005	no	up
ASCC3	Activating signal cointegrator 1 complex subunit 3	49	20	0.292439	0.541103	0.922129	31142010	32904000	39340010	37761980	33560020	28555010	33083020	34717000	26.2	251.46		151.098	-0.11397	0.706201	no	up
ASF1A	Histone chaperone ASF1A	4	4	0.656121	0.82938	1.13855	14619010	28924020	27803990	29286990	52329010	19216990	24234990	23741000	44.1	22.968		32.4874	-0.352979	0.457446	no	up
ASF1B	Histone chaperone ASF1B	3	3	0.146577	0.365214	1.65981	1708766	6025900	5034298	4633703	8181695	7577400	5596798	5254197	28.2	22.433		23.0709	0.114425	0.872778	no	down
ASH2L	Set1/Ash2 histone methyltransferase complex subunit ASH2	16	16	0.731088	0.874785	1.03951	60801000	67201020	59863000	48736000	47928980	68300030	68413000	62152000	35.2	68.722		72.4181	0.0984002	0.804795	no	down
ASL	Argininosuccinate lyase	6	1	0.271364	0.524971	0.775672	3314799	3752301	2098999	2648802	3437501	1544300	2307699	2043499	18.8	51.657		11.1692	0.522183	0.503411	no	down
ASMTL	N-acetylserotonin O-methyltransferase-like protein	14	14	0.592605	0.792259	1.13969	40190020	26684990	25434020	28557010	55418030	36551000	20283990	31985990	28.5	68.856
ASNA1	ATPase ASNA1;ATPase Asna1	12	12	0.400683	0.639441	0.922369	125410000	121990100	92478950	94568970	100640000	108550000	90440020	98017980	54.9	38.792
ASNS	Asparagine synthetase [glutamine-hydrolyzing]	17	7	0.000595678	0.0319175	2.05699	83798950	86404950	62497990	76073020	196930100	157380000	133380000	149089900	37.6	64.369		102.536	1.91708	6.49486e-23	yes	down
ASNSD1		2	2	0.486871	0.713192	1.49325	2180300	1536301	1189109	320694	1679699	2117300	602122	2965801	19.8	11.25		58.5775	-0.0735392	0.883924	no	up
ASPH	Aspartyl/asparaginyl beta-hydroxylase	25	12	0.0106786	0.0925036	1.4415	34643000	30089010	38701010	28160010	43342010	57379980	47021970	41943980	41.3	85.862		38.3993	-0.0461122	0.933391	no	up
ASPM	Abnormal spindle-like microcephaly-associated protein	17	15	0.503117	0.728771	0.678118	10249010	7106303	8227295	8440103	1138700	9202902	11267000	9057500	6	409.8		246.21	0.170624	0.634111	no	down
ASPSCR1	Tether containing UBX domain for GLUT4	18	18	0.389522	0.629396	0.904737	31930010	28065020	33783000	32917010	38430020	25063990	26965020	25707000	42.5	60.182		37.796	0.133989	0.806924	no	down
ASRGL1	Isoaspartyl peptidase/L-asparaginase;Isoaspartyl peptidase/L-asparaginase alpha chain;Isoaspartyl peptidase/L-asparaginase beta chain	5	5	0.532342	0.749879	0.894013	16806010	16290990	20692990	9454297	13676990	14180010	13957000	12641010	20.5	32.054		26.4812	-0.581233	0.183992	no	up
ASS1	Argininosuccinate synthase	19	8	0.0473889	0.199659	3.21506	14210000	4652001	6353698	2311901	37970990	12942000	10681000	19765990	46.8	46.53		40.9636	1.55545	5.64711e-08	yes	down
ASTE1	Protein asteroid homolog 1	2	2	0.283502	0.535845	1.44597	440468	569817	1709306	773210	1267600	887850	1370300	940300	4.6	77.092		10.1725	-0.419349	0.643837	no	up
ASUN	Protein asunder homolog	16	16	0.78928	0.903703	0.977834	25444010	27720010	34332000	28129990	24373990	28723990	29107000	30558980	24.1	80.224
ASXL2	Putative Polycomb group protein ASXL2	5	5	0.41463	0.653294	0.923007	1999801	1993901	1911700	1804800	1386600	2027900	1771999	2003999	4	153.82		79.9665	-0.408611	0.137108	no	up
ATAD1	ATPase family AAA domain-containing protein 1	13	13	0.176533	0.410319	0.884485	43292990	53650980	50868030	51435000	44995010	49183990	36452980	46104020	43.2	40.744		30.1486	-0.480426	0.304907	no	up
ATAD2	ATPase family AAA domain-containing protein 2	21	12	0.0177904	0.122273	1.64355	8355403	13263000	13904000	10620000	19887010	18171990	23061000	14327010	20.3	158.55		80.0564	-0.341562	0.312501	no	up
ATAD2B	ATPase family AAA domain-containing protein 2B	18	17	0.000671702	0.0365333	1.90773	9474806	13129000	13212000	12783000	25747000	21281010	25178010	20171000	15.2	164.91		30.2944	0.29881	0.56715	no	down
ATAD3A	ATPase family AAA domain-containing protein 3A	30	8	0.00413251	0.0585251	0.718023	154359900	190930000	196620000	158050000	124230100	137620100	125100000	113820000	51.6	71.368		53.5993	-0.635996	0.0601341	no	up
ATAD3B	ATPase family AAA domain-containing protein 3B	23	4	0.371375	0.615219	0.755625	38280980	36317000	24097000	20648990	24938990	31521980	27233000	10534000	39.2	72.572		65.6234	-0.570248	0.0370872	no	up
ATAD5	ATPase family AAA domain-containing protein 5	26	23	0.0119252	0.0990257	1.41834	11618000	12244990	14543000	11079010	17129000	14621000	21402000	17306000	18.3	207.57		77.8143	0.0874054	0.855972	no	down
ATAT1	Alpha-tubulin N-acetyltransferase 1	7	4	0.172362	0.403656	1.59791	2178900	2331619	2356900	951720	1651800	4320002	3568999	2917199	21.9	46.81
ATE1	Arginyl-tRNA--protein transferase 1	6	6	0.0434756	0.19328	0.551159	8197102	5500002	6079899	6074099	4201303	1861499	3992502	4920597	16.2	59.09		18.0571	0.0818227	0.916288	no	down
ATF1	Cyclic AMP-dependent transcription factor ATF-1	5	3	0.399515	0.638091	1.19385	11165000	16821990	20825990	9703998	19735000	14875990	18609990	14112990	21	29.232		18.1075	-0.071425	0.930907	no	up
ATF2	Cyclic AMP-dependent transcription factor ATF-2	11	10	0.347236	0.595662	1.20457	4244301	4447797	8078200	5995702	6118597	5104603	7736396	7966804	36.8	54.537		25.4497	-0.23741	0.682629	no	up
ATF6	Cyclic AMP-dependent transcription factor ATF-6 alpha;Processed cyclic AMP-dependent transcription factor ATF-6 alpha	7	7	0.0224538	0.140103	0.530556	6055897	4535503	7546698	8116396	2440802	4310202	4646401	2727101	12.4	74.584		21.9996	0.161468	0.806304	no	down
ATF6B	Cyclic AMP-dependent transcription factor ATF-6 beta;Processed cyclic AMP-dependent transcription factor ATF-6 beta	4	1	0.311096	0.560278	0.727285	532250	1394994	890340	581680	630460	341555	817924	610820	7.1	76.708
ATF7	Cyclic AMP-dependent transcription factor ATF-7	8	7	0.00684053	0.0743394	1.64077	5868701	4812003	7411602	5283202	11183000	7991900	10479990	8556499	28.8	51.756
ATF7IP	Activating transcription factor 7-interacting protein 1	27	27	0.30926	0.557609	1.08017	93356050	83944980	90862010	69695020	94918940	86337010	93048000	88601010	33.1	136.39		211.058	0.557615	0.00896331	no	down
ATG101	Autophagy-related protein 101	2	2	0.296371	0.545547	0.807651	2633699	3105998	5240198	4112299	3555200	2484799	2395701	3544102	8.3	25.002		33.1236	-0.326152	0.500963	no	up
ATG13	Autophagy-related protein 13	9	9	0.995674	0.998244	0.999591	7975203	6269703	6138796	6253899	6313597	7238896	6811500	6156303	20.7	56.571		37.3612	0.142093	0.800808	no	down
ATG14	Beclin 1-associated autophagy-related key regulator	4	4	0.14451	0.361145	0.631937	2069499	3045002	2516400	3103601	2696712	908638	2417601	1324900	12.8	55.309		22.8079	0.199115	0.763275	no	down
ATG16L1	Autophagy-related protein 16-1	12	3	0.058866	0.219013	0.603641	4538802	1868299	2208899	3305399	1943799	1941300	1383701	1574400	20.8	68.264		21.1317	0.0395101	0.95775	no	down
ATG2A	Autophagy-related protein 2 homolog A	16	15	0.321872	0.572125	0.461313	15294990	10431010	12585990	12911000	691085	12423010	12097010	11305000	14.2	212.86		57.0986	-0.127588	0.801569	no	up
ATG2B	Autophagy-related protein 2 homolog B	9	8	0.513719	0.737145	1.39026	1528948	3522302	1042688	1038129	1680881	974683	5919898	2245400	6	232.76		37.0977	-0.353369	0.437723	no	up
ATG3	Ubiquitin-like-conjugating enzyme ATG3	9	9	0.201106	0.438435	0.771994	66235970	65595980	74353030	88833010	43801980	53141020	47799000	91613000	23.2	35.864		26.6947	-0.673399	0.111184	no	up
ATG4A	Cysteine protease ATG4A	2	2	0.731507	0.875115	0.860686	1321300	919550	867460	1308101	1121407	285972	1642366	1436447	9.8	45.377		4.60882	-0.180681	0.9087	no	up
ATG4B	Cysteine protease ATG4B	6	6	0.481968	0.709464	1.26105	9519995	6997597	9456397	11298000	21407010	16330000	5898601	8728697	24.4	44.294		52.1927	0.274582	0.497339	no	down
ATG4C	Cysteine protease ATG4C	3	3	0.0840472	0.268069	0.660223	1245900	1799601	1512600	1475200	994928	1139600	590965	1418700	9.4	52.497		16.5304	-0.0940058	0.908641	no	up
ATG5	Autophagy protein 5	9	9	0.0505836	0.202984	0.825637	20372000	20095010	21639000	19858010	14526990	19749010	15179000	18771010	33.8	32.447		20.7584	-0.404268	0.482802	no	up
ATG7	Ubiquitin-like modifier-activating enzyme ATG7	12	6	0.0059004	0.0673981	1.61397	3435402	3111201	3528202	3091099	4638201	5312901	4444000	7222702	18.5	77.959		17.3762	0.907996	0.0679703	no	down
ATG9A	Autophagy-related protein 9A	11	11	0.129481	0.341367	1.13375	12072000	10673000	13145000	10985990	13176990	13860990	11445990	14705000	17.3	94.446		67.3599	0.269154	0.454207	no	down
ATHL1	Acid trehalase-like protein 1	2	2	0.10639	0.303138	1.26342	685900	953152	713576	637020	1095100	987730	731940	956400	4.2	80.654
ATIC	Bifunctional purine biosynthesis protein PURH;Phosphoribosylaminoimidazolecarboxamide formyltransferase;IMP cyclohydrolase	39	30	0.0260416	0.149905	0.832342	957559800	851939600	876250400	831540000	701080100	671489700	706950300	857230500	78	64.615		194.297	-0.281102	0.151744	no	up
ATL1	Atlastin-1	9	2	0.727	0.871901	1.12774	725020	707580	1181947	1397600	1133700	488658	1406200	1759501	17.7	63.543		4.64345	-0.313667	0.834641	no	up
ATL2	Atlastin-2	16	15	0.72344	0.870392	1.02894	74754980	83924020	90637050	72407050	83170050	96123060	78161020	73857000	39.6	66.228		52.2913	-0.11524	0.800827	no	up
ATL3	Atlastin-3	17	8	0.192795	0.430515	0.808543	33383990	43517990	38644000	24225990	32816990	28223000	23323000	26909000	42.7	60.541		28.6094	-0.53547	0.228392	no	up
ATM	Serine-protein kinase ATM	31	25	0.350346	0.598817	0.745386	12267000	18116990	13590010	15147010	4747899	13582000	14434010	15172000	11.9	350.68		87.2718	0.0152945	0.970481	no	down
ATP11A	Probable phospholipid-transporting ATPase IH	8	6	0.26192	0.515954	0.404598	3519602	3797099	5793300	5348597	453866	641761	4402103	8654604	8	129.75		131.792	-0.523037	0.0234179	no	up
ATP11B	Probable phospholipid-transporting ATPase IF	5	3	0.288222	0.539397	0.654193	1601771	1403487	919985	377735	987340	482450	579171	518649	4.4	134.19		28.4735	0.284845	0.575919	no	down
ATP11C	Phospholipid-transporting ATPase IG	19	17	0.0940223	0.28404	1.22914	27942990	38785980	32864010	24990010	37534020	40547010	39417010	33866980	21.4	129.48		132.582	-0.192232	0.553875	no	up
ATP13A1	Manganese-transporting ATPase 13A1	29	29	0.631492	0.812876	1.05031	106290000	98719990	115959900	96873980	125320000	117090100	115749900	84453040	28.3	132.95		123.71	-0.2305	0.402579	no	up
ATP13A2	Probable cation-transporting ATPase 13A2	9	9	0.557633	0.768504	1.07955	4872100	5413398	4490100	3754201	6063500	5587600	4422403	4030102	12.3	128.79		125.897	0.229072	0.427735	no	down
ATP13A3	Probable cation-transporting ATPase 13A3	10	10	0.173792	0.405265	0.719246	8839299	12660990	10347000	4767902	6704697	5955797	6440503	5745103	12.6	138.04		124.963	-0.516648	0.00998106	no	up
ATP1A1	Sodium/potassium-transporting ATPase subunit alpha-1	43	10	0.366487	0.613334	0.933344	413620300	532210200	477559800	412459900	444830200	386169800	426639900	448980300	42.7	112.89		547.914	0.0663745	0.76811	no	down
ATP1A1-AS1	Putative uncharacterized protein ATP1A1-AS1	1	1	0.34073	0.588607	0.365361	7866599	17479010	16670010	1663129	6725204	1538173	416110	15781010	17.9	10.239
ATP1A2	Sodium/potassium-transporting ATPase subunit alpha-2	22	3	0.274511	0.52821	2.23412	2760299	3128198	395647	409834	4472901	3672300	2199702	965394	26.7	112.26		21.9953	2.54807	1.18103e-08	yes	down
ATP1A3	Sodium/potassium-transporting ATPase subunit alpha-3	28	11	0.0776089	0.256725	0.0906372	173780000	198120100	218030000	179200100	591899	61356960	45082000	55449030	33.4	111.75
ATP1B1	Sodium/potassium-transporting ATPase subunit beta-1	10	10	0.159164	0.384056	1.16934	90710060	102939900	102990000	124000000	140170100	132560100	119310000	100569900	36.6	35.061		34.702	0.0457556	0.940616	no	down
ATP1B3	Sodium/potassium-transporting ATPase subunit beta-3	14	11	0.227429	0.472645	0.913045	415470000	399670000	456729800	432880100	412029900	436599900	328620100	385949800	43.7	31.512		108.921	0.215776	0.446115	no	down
ATP2A2	Sarcoplasmic/endoplasmic reticulum calcium ATPase 2	40	6	0.276179	0.528969	1.34231	54857030	22557990	50903020	55229980	73376020	67714010	46078000	49332990	37.4	114.76		438.528	-0.0908957	0.695254	no	up
ATP2A3	Sarcoplasmic/endoplasmic reticulum calcium ATPase 3	16	6	0.29121	0.541113	0.765731	8006103	8314697	14544000	7391503	4642299	6622196	7529397	10629000	18.2	109.25		53.8475	-0.618694	0.0656306	no	up
ATP2B1	Plasma membrane calcium-transporting ATPase 1	25	1	0.1008	0.29512	2.86311	4962599	4807901	6051703	626409	11380000	9247700	8070098	7156499	26.5	134.68		72.0886	0.151934	0.7069	no	down
ATP2B4	Plasma membrane calcium-transporting ATPase 4	23	10	0.905032	0.960961	0.980119	17643990	14899000	15245010	11127010	19479000	14844990	13694000	10392000	22.3	137.92		43.7237	0.0171335	0.976391	no	down
ATP2C1	Calcium-transporting ATPase type 2C member 1	17	17	0.434884	0.670873	1.07966	20970990	27694990	30667010	22695990	27080020	27344010	29074000	25514000	25.1	100.58		77.4095	-0.130683	0.725669	no	up
ATP5A1	ATP synthase subunit alpha, mitochondrial	34	5	0.52897	0.747713	1.37702	70858980	148800100	50158020	23545010	99301980	151049900	77986990	38272990	61.8	59.75
ATP5B	ATP synthase subunit beta, mitochondrial	29	29	0.0529826	0.206972	0.916221	5471094000	6175197000	5851206000	5713803000	5262796000	5698504000	5287904000	5019205000	75.4	56.559
ATP5C1	ATP synthase subunit gamma, mitochondrial	15	11	0.118916	0.326204	0.872838	346240000	492349900	411430000	401300200	369060000	369990100	349630100	342179900	52	32.996
ATP5D	ATP synthase subunit delta, mitochondrial	5	4	0.427163	0.664675	0.871599	78905970	62905010	68450000	77425040	85466970	68620980	41304980	62670010	47.6	17.49
ATP5F1	ATP synthase F(0) complex subunit B1, mitochondrial	12	12	0.321147	0.571104	0.741132	60978980	131300000	109870000	107880000	41789990	66362010	118950100	86793990	40.6	28.908
ATP5H	ATP synthase subunit d, mitochondrial	15	13	0.0859771	0.271025	1.18109	378630100	444079900	417790000	391430200	574280100	510630300	419050100	435440100	78.9	18.491
ATP5I	ATP synthase subunit e, mitochondrial	3	3	0.494681	0.720433	1.20567	83708040	94606980	103150000	80625050	216309900	112360000	68614000	83454000	31.9	7.9331
ATP5J	ATP synthase-coupling factor 6, mitochondrial	6	6	0.674132	0.838238	0.920378	24860010	35514000	39326020	27562000	43900020	20936000	26689010	27994010	51.9	12.587
ATP5J2	ATP synthase subunit f, mitochondrial	4	4	0.427978	0.665458	0.770323	82112020	72210020	217930000	87420010	78703950	66929000	58264970	129599900	41.5	10.918
ATP5L	ATP synthase subunit g, mitochondrial	5	5	0.51576	0.738787	1.06437	145700000	165250100	196570100	198570100	206199900	170170000	170990000	201030100	46.6	11.428
ATP5O	ATP synthase subunit O, mitochondrial	11	9	0.88163	0.94986	1.02191	244149800	248900000	234489900	290650000	378910000	222299900	213070000	251669900	59.6	23.277
ATP5S	ATP synthase subunit s, mitochondrial	3	3	0.799315	0.908586	1.05241	3818298	6666099	8873805	5972498	5272101	6447600	6272397	7761198	13	24.866
ATP5SL	ATP synthase subunit s-like protein	2	2	0.284718	0.536896	0.491901	3832499	2720101	645659	6265502	2436601	2050099	529066	934263	4.3	29.267
ATP6AP1	V-type proton ATPase subunit S1	11	6	0.246065	0.495329	0.852642	25768010	30978990	28424010	19094010	26432990	19720990	21443010	20485010	27.4	52.025		56.8283	-0.243993	0.547206	no	up
ATP6AP2	Renin receptor	11	3	0.989868	0.996598	0.992145	5602698	8451101	3070092	1040737	4883701	6142003	4360300	1120800	36.6	39.008		67.561	-0.853163	0.000352265	no	up
ATP6V0A1	V-type proton ATPase 116 kDa subunit a isoform 1	19	17	0.00123367	0.0410458	0.747838	65386960	62196960	62871000	56941970	51029020	46255000	41637010	46335980	24.6	96.412		33.7692	-0.279704	0.557304	no	up
ATP6V0A2	V-type proton ATPase 116 kDa subunit a isoform 2	17	15	0.292003	0.540797	0.922665	35172010	43637020	46615980	45342020	41051020	36460980	40704000	38589980	23.1	98.081		55.8919	-0.142112	0.739209	no	up
ATP6V0C	V-type proton ATPase 16 kDa proteolipid subunit	1	1	0.162842	0.38937	0.659464	83181050	90865970	67603980	88490030	67728960	53811020	87286970	26882010	11.6	15.736		69.1987	-0.475665	0.153744	no	up
ATP6V0D1	V-type proton ATPase subunit d 1	7	7	0.389864	0.629276	0.878996	71862020	76300050	66754030	46792020	65710030	62026000	56356970	44511030	24.2	40.329		49.2254	-0.481428	0.147975	no	up
ATP6V0D2	V-type proton ATPase subunit d 2	1	1	0.0701322	0.240804	0.466831	3592603	1620571	877730	1296899	819164	748165	466603	1100700	4.3	40.426
ATP6V1A	V-type proton ATPase catalytic subunit A	27	6	0.738185	0.878229	1.08567	26930990	26533020	37570010	36889020	53582010	26879980	21387010	44665000	48.9	68.303		59.1396	-0.317555	0.337017	no	up
ATP6V1B2	V-type proton ATPase subunit B, brain isoform	22	17	0.0432735	0.19206	0.790571	113790000	147460000	102449900	139179900	96455950	108970000	94656020	93938940	61.4	56.5		55.8471	-0.175276	0.687658	no	up
ATP6V1C1	V-type proton ATPase subunit C 1	18	18	0.193993	0.431497	0.909646	70051030	65761040	63837980	68172020	67035970	66400980	51452010	59934030	51.6	43.941		17.5945	-0.0652192	0.935504	no	up
ATP6V1D	V-type proton ATPase subunit D	12	12	0.479872	0.707947	0.950297	33289010	43390000	39154000	40238990	35635010	39958020	33746980	38621980	52.6	28.262		22.5812	-0.0927841	0.89824	no	up
ATP6V1E1	V-type proton ATPase subunit E 1	11	11	0.284802	0.536611	0.92547	109100000	102650100	126760000	116710000	105740100	96359980	99587010	119780000	54	26.157		25.9545	-0.00996483	0.989504	no	up
ATP6V1F	V-type proton ATPase subunit F	7	7	0.785141	0.901176	1.03473	27957990	23522990	22513990	22464010	32631990	24654990	19238010	24634000	82.4	13.37		35.24	-0.307617	0.50539	no	up
ATP6V1G1	V-type proton ATPase subunit G 1	3	3	0.593642	0.792626	0.876776	10202000	9690101	11202000	8930002	15920000	7522900	5339299	9139102	29.7	13.757		61.0381	-0.468042	0.146417	no	up
ATP6V1H	V-type proton ATPase subunit H	16	16	0.00850456	0.0831622	0.688291	51892980	48633020	47182010	64023000	31415020	35217000	35419000	43662990	43.3	55.882		34.958	-0.150052	0.776397	no	up
ATP7A	Copper-transporting ATPase 1	2	2	0.463287	0.695492	0.730991	536026	1733000	1469000	1958500	1834645	521060	1078950	739840	2.3	163.37		5.6821	-1.37908	0.14306	no	up
ATP8A1	Phospholipid-transporting ATPase IA	5	5	0.255277	0.506879	2.30549	674590	454048	646322	844124	5665303	3540599	564797	416730	5.1	131.37		15.5101	1.907	0.000126396	yes	down
ATPAF1	ATP synthase mitochondrial F1 complex assembly factor 1	10	10	0.021436	0.136303	0.52232	18720000	28286990	33625000	33662000	9280500	14596010	17668990	18639000	33.5	36.436		55.2423	0.0652934	0.889786	no	down
ATPAF2	ATP synthase mitochondrial F1 complex assembly factor 2	4	4	0.706598	0.859515	1.05703	9305502	8650097	14869000	9282095	11561000	12626990	9876504	9619095	21.5	32.772
ATPIF1	ATPase inhibitor, mitochondrial	5	5	0.858959	0.938595	0.955887	98629980	60421970	67125990	61825010	109440000	82524050	55280020	41357980	34.9	12.249
ATR	Serine/threonine-protein kinase ATR	15	15	3.03834e-05	0.0178462	5.24635	1383600	1736601	2644201	1863600	10229000	9512598	11134000	8279496	7.1	301.36		46.732	1.61105	3.05648e-09	yes	down
ATRN	Attractin	6	6	0.997808	0.998888	0.999671	8183999	6176897	6097399	8710805	5975001	7961097	7104199	7934901	4.3	158.54		50.4724	0.31846	0.375643	no	down
ATRX	Transcriptional regulator ATRX	45	24	0.156724	0.38002	1.15445	41297000	37443020	46505000	33881000	52038010	39752000	47599980	43950020	20.1	282.58		191.728	0.0246818	0.956843	no	down
ATXN10	Ataxin-10	15	12	0.186864	0.421432	1.09842	62147980	64114990	62056020	78596960	75153040	67174990	74782950	74936950	34.3	53.488		145.877	0.354367	0.102282	no	down
ATXN2	Ataxin-2	21	11	0.230347	0.475894	0.858593	27802990	38633990	31819010	36739020	23664010	26050020	33166010	33376000	25.3	140.28		70.4537	0.19084	0.622701	no	down
ATXN2L	Ataxin-2-like protein	38	38	0.302721	0.551211	0.943273	227130100	248299900	209239900	236889800	240450000	211309900	215569900	202050000	42	113.37		269.588	-0.10285	0.722843	no	up
ATXN3	Ataxin-3	6	6	0.437929	0.673019	0.809088	4155299	7516696	7335904	7376401	7917705	3904498	3374899	6941997	21.3	41.25		9.87078	0.360101	0.68865	no	down
ATXN7	Ataxin-7	2	2	0.384876	0.625352	0.433396	533127	872609	5110498	9434095	912775	192700	1909000	2356700	4.6	95.45
ATXN7L3B	Putative ataxin-7-like protein 3B	1	1	0.94243	0.979731	1.01494	3421501	5036102	5994497	4881003	6245199	4244801	3257901	6194299	10.3	10.771		30.7066	0.246046	0.646008	no	down
AUH	Methylglutaconyl-CoA hydratase, mitochondrial	11	11	0.262043	0.515813	0.86245	52118980	56186980	62960000	44917980	60778010	43680020	38645020	44660990	29.3	33.395		14.3999	0.586632	0.393721	no	down
AUP1	Ancient ubiquitous protein 1	10	8	0.822194	0.921688	1.02028	45135020	32894000	40523000	38862980	38049990	46439010	39847020	35984020	32.4	45.786		67.0613	-0.32604	0.341562	no	up
AURKA	Aurora kinase A	12	11	0.325167	0.57476	0.748973	18461000	30349020	27449010	30976000	9793004	20703990	27535010	26851000	37.2	45.809		65.3022	-0.508206	0.0752732	no	up
AURKAIP1	Aurora kinase A-interacting protein	2	2	0.0543126	0.209464	0.680043	4926000	5334001	6166502	8897806	4971398	4660299	4110799	3237399	11.6	22.354		201.739	-0.503254	0.0053619	no	up
AURKB	Aurora kinase B	14	13	0.0194585	0.12944	1.32773	47195980	53898030	60286000	49426020	59503030	71426980	83656050	66249980	44.5	39.31		97.6597	0.338923	0.191894	no	down
AUTS2	Autism susceptibility gene 2 protein	3	3	0.205963	0.445893	0.700126	2727318	3371501	1783299	2195300	1052906	1885799	2881201	1511900	3.4	138.98		177.87	-0.00357147	0.992847	no	up
AVEN	Cell death regulator Aven	4	4	0.0342082	0.170514	1.52089	4029100	5237199	5588302	7939403	7015002	8520500	8899806	9416600	18.5	38.506		12.2911	1.23223	0.0496888	yes	down
AVL9	Late secretory pathway protein AVL9 homolog	9	9	0.846161	0.932216	0.976925	14072010	15886990	20764000	13062000	15344010	14362000	14037000	17854010	17.4	71.947		39.4765	-0.220167	0.634111	no	up
AXIN1	Axin-1	6	6	0.464841	0.695712	0.677779	593062	1159199	626273	1572501	2152621	439983	531204	283987	8.9	95.634		100.851	-0.165045	0.586983	no	up
AXL	Tyrosine-protein kinase receptor UFO	5	3	0.908604	0.963251	0.968867	4661402	2445401	3411902	2341901	1954299	5289401	2589498	2998299	6.6	98.336		28.9864	1.19976	0.00107214	yes	down
AZGP1	Zinc-alpha-2-glycoprotein	3	3	0.18453	0.41936	2.24192	985368	945497	621950	191127	1820195	609150	3171201	795698	15.1	34.258
B3GALT5	Beta-1,3-galactosyltransferase 5	4	4	0.929814	0.973606	0.979695	4216198	3675199	3392601	2473700	3617999	5389704	2815000	2182399	17.4	36.189		19.7585	0.305013	0.621615	no	down
B3GALT6	Beta-1,3-galactosyltransferase 6	3	3	0.46197	0.694427	0.71363	889737	1197200	2116899	1590999	839245	352307	1597001	1970499	10	37.137		51.0587	0.248308	0.576659	no	down
B3GALTL	Beta-1,3-glucosyltransferase	3	3	0.191215	0.428624	1.30054	3428501	2615500	2077801	2077001	2658499	4023298	4133202	2504300	9.2	56.563
B3GAT3	Galactosylgalactosylxylosylprotein 3-beta-glucuronosyltransferase 3	6	6	0.102337	0.297208	1.43824	5248900	4221201	5521802	3580701	9661894	6939904	6288497	4445499	24.2	37.121		24.5121	0.517693	0.264246	no	down
B3GNT2	N-acetyllactosaminide beta-1,3-N-acetylglucosaminyltransferase 2	3	3	0.824652	0.922929	1.09348	1016503	2180101	2407799	575340	1507338	843803	1828700	1887001	12.6	46.021		44.0346	-0.284772	0.484994	no	up
B3GNT7	UDP-GlcNAc:betaGal beta-1,3-N-acetylglucosaminyltransferase 7	9	9	0.0836213	0.267866	1.22924	19449990	20266990	24929000	21554990	30889990	27451990	27377000	20832000	30.2	45.987		146.778	0.0754918	0.871971	no	down
B4GALT1	Beta-1,4-galactosyltransferase 1;Lactose synthase A protein;N-acetyllactosamine synthase;Beta-N-acetylglucosaminylglycopeptide beta-1,4-galactosyltransferase;Beta-N-acetylglucosaminyl-glycolipid beta-1,4-galactosyltransferase;Processed beta-1,4-galactosyltransferase 1	4	4	0.952721	0.983436	1.00926	3256902	3571500	4706402	4957700	3483599	3499099	5516701	4187699	20.1	43.92		19.2002	0.446659	0.439641	no	down
B4GALT4	Beta-1,4-galactosyltransferase 4;N-acetyllactosamine synthase;Lactotriaosylceramide beta-1,4-galactosyltransferase	5	5	0.997825	0.998775	0.999497	20375990	22377010	15444000	14779000	21278000	24284000	15668990	12828000	19.2	40.041		25.1976	0.337725	0.518127	no	down
B4GALT5	Beta-1,4-galactosyltransferase 5	4	4	0.760814	0.886013	0.955967	6338101	6348097	6022204	5410000	6437303	6750405	6584900	3825999	11.6	45.118		66.8843	-0.586033	0.0248867	no	up
B4GAT1	Beta-1,4-glucuronyltransferase 1	6	6	0.303086	0.550773	0.641464	7705905	8444400	3504201	17796010	6741397	3215100	4011401	7902301	19.5	47.119		45.591	0.305986	0.498188	no	down
BABAM1	BRISC and BRCA1-A complex member 1	9	9	0.871097	0.945824	1.03736	33863000	30980990	15842010	19516990	20766990	30096010	30485020	19714990	39.2	36.56		44.0029	-0.126944	0.795146	no	up
BAD	Bcl2-associated agonist of cell death	5	5	0.198518	0.435399	0.796863	4260402	4709502	3817001	3366201	4336798	2215301	3449000	3137099	39.9	18.392		19.2981	-0.180508	0.82171	no	up
BAG1	BAG family molecular chaperone regulator 1	5	4	0.729824	0.873996	1.15542	2448902	1170101	2034501	2149200	4125499	799751	2039901	3317798	13.3	38.778		27.5868	0.610471	0.173047	no	down
BAG2	BAG family molecular chaperone regulator 2	10	4	0.11083	0.310908	3.5986	37814990	3850198	3417500	12188000	48188020	26426000	68901980	11591000	48.8	23.772		18.7729	0.0544486	0.944046	no	down
BAG3	BAG family molecular chaperone regulator 3	16	16	0.08871	0.27597	0.757441	11779000	10010000	13899000	15217000	10471010	8879497	7448704	11852000	44.3	61.594		29.3143	0.0398668	0.954097	no	down
BAG4	BAG family molecular chaperone regulator 4	8	8	0.100823	0.295029	0.801927	7096699	9446101	9591196	7750196	5926899	5829903	8418995	7084100	29.3	49.593		43.0405	-0.291187	0.513732	no	up
BAG5	BAG family molecular chaperone regulator 5	13	13	0.0613871	0.222941	0.71165	30819020	32594000	37497020	46061980	20128990	24890010	24970000	35571000	38.5	51.199		50.9623	-0.397534	0.234063	no	up
BAG6	Large proline-rich protein BAG6	31	31	0.105489	0.301687	0.884168	163490100	170780100	163409900	170120100	129079900	144990000	144560100	175330000	39.1	119.41		4.80742	0.110162	0.945317	no	down
BAHD1	Bromo adjacent homology domain-containing 1 protein	4	4	0.516105	0.739003	0.781459	821549	1632100	2690398	1258699	1215937	562655	1280701	1932601	9.5	84.651		97.2339	-0.158748	0.662945	no	up
BAI1	Brain-specific angiogenesis inhibitor 1	1	1	0.646343	0.823868	0.863801	666650	1189256	812810	489842	1005600	587379	865880	343615	0.9	173.5
BAIAP2	Brain-specific angiogenesis inhibitor 1-associated protein 2	25	25	0.077366	0.256241	0.827724	35702020	43063000	50763970	42965980	38633990	31517980	38723990	33382000	52.2	60.867		18.3433	-0.200152	0.777355	no	up
BAIAP2L1	Brain-specific angiogenesis inhibitor 1-associated protein 2-like protein 1	18	9	0.963085	0.9864	0.986505	15290000	12066000	11858000	5208000	14922990	7009801	10257000	10056990	43.2	56.882		28.9965	0.483319	0.276945	no	down
BAK1	Bcl-2 homologous antagonist/killer	4	4	0.84151	0.930464	1.19699	6136703	15628010	9091104	380642	5316899	7299904	6770497	2592599	39.3	23.408		26.098	-1.09264	0.00674821	yes	up
BANF1	Barrier-to-autointegration factor;Barrier-to-autointegration factor, N-terminally processed	4	2	0.151216	0.37178	0.441137	65053010	89934000	452749900	55409020	44747990	50056000	66972020	37051000	34.8	10.058		65.3832	0.100872	0.833877	no	down
BANP	Protein BANP	5	5	0.0307018	0.161906	1.18452	6960699	5927996	6468801	6433899	8198803	7656501	8157997	6601802	11.2	56.494		16.3969	-0.0738571	0.93796	no	up
BAP1	Ubiquitin carboxyl-terminal hydrolase BAP1	11	11	0.990961	0.996972	1.00322	7606900	6270797	12967000	3578902	6043204	7834000	6486202	7302298	15.4	80.361		91.3	-0.0775697	0.836482	no	up
BAP18	Chromatin complexes subunit BAP18	7	7	0.000404347	0.0339155	1.45542	30068020	28545010	26949010	25902990	38761020	44016020	42814010	36804020	55.2	17.9
BARD1	BRCA1-associated RING domain protein 1	11	11	0.218851	0.461501	1.48996	12792990	28258990	51648020	27353010	38888010	38775980	46090000	36216020	16	86.647		38.5668	-0.0373313	0.948447	no	up
BASP1	Brain acid soluble protein 1	18	16	0.415468	0.653431	0.845256	325230200	342890000	343560200	363739800	506820200	256950000	212679900	256840000	92.1	22.693		141.411	0.0465358	0.901137	no	down
BAX	Apoptosis regulator BAX	9	7	0.0676449	0.234821	0.849933	63146980	72162970	59345980	71764990	56279020	57958960	48827000	63588990	54.7	21.184		81.6404	0.207516	0.608239	no	down
BAZ1A	Bromodomain adjacent to zinc finger domain protein 1A	34	34	0.0192483	0.129114	1.48455	50189990	48705980	68944980	44144980	93625010	72441040	81949990	65018020	26.4	178.7		64.411	0.215394	0.562593	no	down
BAZ1B	Tyrosine-protein kinase BAZ1B	44	44	0.371524	0.6152	1.10087	148610000	181750000	207770100	176249900	175920000	179420100	240510100	191360100	34	170.9		233.316	-0.485403	0.0161687	no	up
BAZ2A	Bromodomain adjacent to zinc finger domain protein 2A	31	31	0.265251	0.518622	0.869671	51193020	67049000	74366010	65148030	49906990	46814980	65270020	62379040	20.2	211.2		282.141	-0.154126	0.516237	no	up
BAZ2B	Bromodomain adjacent to zinc finger domain protein 2B	12	12	0.87466	0.946962	1.04954	1967500	2247001	6826998	2753901	3566900	3724598	2554401	2971901	8.1	240.46		67.9504	-0.23523	0.572227	no	up
BBS4	Bardet-Biedl syndrome 4 protein	4	4	0.0937949	0.28371	2.03727	2313399	566914	1883701	922932	1619999	2661301	2821301	3229098	13.9	58.281		30.3937	-0.220444	0.671048	no	up
BBX	HMG box transcription factor BBX	9	8	0.0172308	0.121104	2.54705	2587301	3513600	3100800	1469800	10857000	4024101	7366898	5417701	13.5	105.13		51.308	0.454549	0.187421	no	down
BCAM	Basal cell adhesion molecule	10	10	0.375054	0.61732	0.888772	68049020	52006020	50183020	38401980	45529980	50170020	41692980	44683020	21.2	67.404		58.8836	0.921769	0.000615201	no	down
BCAP29	B-cell receptor-associated protein 29	2	2	0.790187	0.904314	1.1213	1034800	1596100	919820	3087999	1272500	1015600	1417701	4047798	10	28.32		8.50481	0.0218263	0.984551	no	down
BCAP31	B-cell receptor-associated protein 31	19	8	0.886376	0.950814	0.971214	124980000	191019900	222679900	189629900	189509900	116710000	241849900	167679900	51.6	27.991		62.9596	-0.232004	0.500991	no	up
BCAR1	Breast cancer anti-estrogen resistance protein 1	15	15	0.00251033	0.0494634	0.654929	18647010	15561990	18868990	18325000	13162000	10574010	13214000	10038000	26.9	93.371		167.6	-0.0151648	0.970551	no	up
BCAS2	Pre-mRNA-splicing factor SPF27	14	14	0.968901	0.987828	1.00339	78385990	97909970	94262020	74761010	96218030	77851010	90794040	80607030	79.6	26.131		20.2229	-0.0910229	0.950249	no	up
BCAT1	Branched-chain-amino-acid aminotransferase, cytosolic	12	12	0.00185743	0.0467979	1.73926	149479900	143530000	165770000	133990100	307090000	252839800	198519900	282909900	31.1	42.966		156.783	0.779571	1.26043e-05	no	down
BCAT2	Branched-chain-amino-acid aminotransferase, mitochondrial	7	7	0.461842	0.694534	1.1602	5309600	6324600	8073598	7671497	7288400	9908795	10252000	5089898	22.2	44.287		20.1734	0.956051	0.0401264	no	down
BCCIP	BRCA2 and CDKN1A-interacting protein	14	11	0.126183	0.337257	0.893654	88549950	90812050	82574030	90609980	93875000	73717980	75886980	73070010	56.4	35.979		71.6227	-0.491278	0.104017	no	up
BCHE	Cholinesterase	3	3	0.228334	0.474091	1.78547	603867	337247	651836	2068287	1997600	1692899	921290	895590	5.8	68.417
BCKDHA	2-oxoisovalerate dehydrogenase subunit alpha, mitochondrial	13	13	0.188424	0.423864	1.11587	30593990	27017010	29642020	34578980	38957010	32920020	30098000	34030000	40.4	50.47
BCKDHB	2-oxoisovalerate dehydrogenase subunit beta, mitochondrial	3	1	0.830823	0.925592	0.918148	7818097	4783099	8372000	13637990	7194902	10093000	3107900	13444010	11.7	43.122		17.559	0.436314	0.483079	no	down
BCKDK	[3-methyl-2-oxobutanoate dehydrogenase [lipoamide]] kinase, mitochondrial	7	7	0.130932	0.342152	0.841264	12296000	13930000	17168000	14041010	13546010	12429000	9775799	12565000	21.8	46.36		65.5594	-0.203535	0.600275	no	up
BCL10	B-cell lymphoma/leukemia 10	10	10	0.00136072	0.04085	0.748931	21242000	19586990	24703010	22958000	17057000	16064010	16500990	16419000	48.5	26.251		14.6507	-0.246851	0.748794	no	up
BCL2L1	Bcl-2-like protein 1	3	3	0.0403482	0.185208	0.538153	7203096	14302010	17090000	8448196	7759803	5898999	4379000	6223604	14.2	26.132		39.2624	-0.312658	0.461809	no	up
BCL2L12	Bcl-2-like protein 12	3	3	0.989808	0.99667	0.997572	4235999	3799600	6953800	5683600	5247700	3527199	5753997	5914899	10.5	36.821		99.8203	0.285301	0.327416	no	down
BCL2L13	Bcl-2-like protein 13	14	14	0.976478	0.990468	0.996509	46075990	56787020	60835010	52331010	47946980	58720990	43603000	66909980	46.8	52.723		41.6001	-0.129427	0.801637	no	up
BCL2L2	Bcl-2-like protein 2	2	2	0.173133	0.404515	0.740358	874919	621865	934436	843388	381067	841849	715267	561440	15	20.746
BCL7A	B-cell CLL/lymphoma 7 protein family member A	3	1	0.508043	0.733727	1.4144	1260629	304016	660943	900618	2527065	1112101	842360	385674	18.1	22.81		7.69469	-0.386644	0.72109	no	up
BCL7B	B-cell CLL/lymphoma 7 protein family member B	5	3	0.0391213	0.18216	1.35449	6974304	5800604	5978399	4350402	7843804	7821105	8792596	6565698	37.6	22.195		10.3299	-0.99889	0.157932	no	up
BCL7C	B-cell CLL/lymphoma 7 protein family member C	5	4	0.0265104	0.151122	2.25554	930227	1393976	2522199	2205800	5551997	2536699	3607700	3674898	30.9	23.468		20.4741	1.39633	0.000757854	yes	down
BCL9	B-cell CLL/lymphoma 9 protein	16	16	0.0412431	0.18749	1.487	4529798	9274796	7551299	6937097	10147000	9544406	10927000	10168000	17.7	149.29		120.505	0.124008	0.68865	no	down
BCL9L	B-cell CLL/lymphoma 9-like protein	10	4	0.991153	0.996771	0.991493	4705599	3577999	4709103	406800	2631099	4496903	657977	4003798	9.1	157.13		146.097	-0.199615	0.529588	no	up
BCLAF1	Bcl-2-associated transcription factor 1	40	22	0.234404	0.480024	1.17645	264679900	257130100	238009900	213070000	374669900	226470100	311910000	249800000	37.9	106.12		298.981	-0.293002	0.339585	no	up
BCOR	BCL-6 corepressor	14	10	0.00323161	0.0579416	0.1655	6287799	6007398	6717997	7178702	1099425	1044269	431935	2755901	11.9	192.19		218.575	-0.500596	0.00387208	no	up
BCORL1	BCL-6 corepressor-like protein 1	10	6	0.250394	0.499994	2.10355	629093	3366201	2507301	401329	1306720	4911401	2574799	2524901	7.3	182.52		33.1457	-0.078128	0.910423	no	up
BCR	Breakpoint cluster region protein	19	18	0.0816115	0.264641	1.41733	15760990	9449898	19271000	13649000	23367020	16540000	19518000	20957000	18.3	142.82		263.967	-0.00624692	0.985073	no	up
BCS1L	Mitochondrial chaperone BCS1	16	16	0.00656096	0.0729742	0.619092	23139000	32899000	37645990	30377000	15977990	19252010	20381000	20398010	44.2	47.534		28.1067	-0.473669	0.287056	no	up
BDH1	D-beta-hydroxybutyrate dehydrogenase, mitochondrial	5	4	0.799645	0.90858	1.07039	14244000	10136000	9777803	8705602	20341000	13187000	7979601	7537195	19	38.157
BDH2	3-hydroxybutyrate dehydrogenase type 2	7	4	0.542064	0.757145	1.18499	17814000	15185000	8804903	13943000	27980990	17140010	13432000	10165000	31	26.724		17.322	0.213576	0.769759	no	down
BECN1	Beclin-1	12	12	0.221336	0.46406	0.923903	31533990	35362010	33535980	34330000	30588010	28357990	36159990	29822990	28.7	51.896		36.0744	-0.420418	0.32869	no	up
BEND3	BEN domain-containing protein 3	28	28	0.0686645	0.236988	1.24399	74453950	78938000	94054020	87635020	108619900	92831010	128819900	89310990	35.5	94.474		129.754	0.127845	0.725438	no	down
BET1	BET1 homolog	1	1	0.669375	0.835716	1.30758	186334	1407100	793761	1215700	2011000	665458	377308	1464803	15.3	13.274		4.10801	1.74079	0.11071	no	down
BET1L	BET1-like protein	4	4	0.957034	0.985342	1.0186	5081998	23120010	7834797	12438000	9138897	10688990	11023010	11446990	44.1	12.388		6.59463	-0.381883	0.731346	no	up
BGN	Biglycan	2	2	0.458345	0.691495	0.680761	687117	2513601	3643400	3852000	1323085	1059400	1102100	3369999	7.9	41.654
BHLHB9	Protein BHLHb9	3	2	0.220185	0.462476	0.54547	1291392	1138000	1350801	693354	1111298	724370	174648	866710	6.4	60.29
BICD1	Protein bicaudal D homolog 1	12	4	0.0441368	0.193479	0.607123	1924900	2470599	2201901	2074699	759116	1644600	1361999	1735901	14.1	110.75		44.7603	-0.220364	0.660627	no	up
BICD2	Protein bicaudal D homolog 2	16	15	0.953983	0.984308	1.00923	6750699	9412206	8191501	8521694	6632799	7343396	7714998	12244990	21.8	93.532		59.4089	0.0713398	0.879234	no	down
BID	BH3-interacting domain death agonist;BH3-interacting domain death agonist p15;BH3-interacting domain death agonist p13;BH3-interacting domain death agonist p11	4	4	0.609933	0.802379	1.08837	8536703	7058400	9521204	11067000	11988990	7040199	8990000	11741000	34.4	21.994		20.0214	0.467336	0.412024	no	down
BIN1	Myc box-dependent-interacting protein 1	9	8	0.330524	0.578744	1.1775	16419990	14059990	11911000	20395990	23061000	16609990	14302010	19681010	24.5	64.699		12.0207	0.569691	0.426868	no	down
BIN3	Bridging integrator 3	3	3	0.000168206	0.0192821	2.05576	592660	582386	715081	718531	1435000	1115631	1318827	1500200	11.9	29.665		9.44819	0.483979	0.581845	no	down
BIRC2	Baculoviral IAP repeat-containing protein 2	9	9	0.900041	0.95795	0.985504	3631801	2846301	2445501	3305902	2498701	2839502	3377800	3289300	16.3	69.899		32.0726	-0.127235	0.827329	no	up
BIRC5	Baculoviral IAP repeat-containing protein 5	5	5	0.201242	0.438518	0.323662	4507498	5725904	918516	5922301	7736795	568232	520038	673909	35.9	16.389		54.8345	-0.0651628	0.892187	no	up
BIRC6	Baculoviral IAP repeat-containing protein 6	60	18	0.326948	0.575091	0.846709	35303990	29336010	39886980	39213980	23309010	31191990	26023990	44003970	17.4	530.25		349.527	-0.255352	0.145089	no	up
BLM	Bloom syndrome protein	33	33	0.000430727	0.0325405	1.56475	85629040	82101050	95691950	77127030	134090000	119600100	148980000	130190000	29.4	159		87.1648	0.366559	0.242115	no	down
BLMH	Bleomycin hydrolase	12	12	0.521438	0.74131	1.07135	77044980	65957040	55571000	72961990	69795980	72208020	61767000	87198040	25.1	52.562		57.4182	-0.0432113	0.928076	no	up
BLOC1S3	Biogenesis of lysosome-related organelles complex 1 subunit 3	4	4	0.809279	0.916373	0.948792	2123301	1817699	3050002	3859698	2653600	2521899	1768400	3111201	31.2	21.255		5.10146	-0.432212	0.751261	no	up
BLOC1S4	Biogenesis of lysosome-related organelles complex 1 subunit 4	4	4	0.0307635	0.161831	0.534095	1734460	2195201	1688900	1059416	1154345	549316	1026100	851994	24.4	23.351		34.463	-0.112061	0.844971	no	up
BLVRA	Biliverdin reductase A	5	5	0.184593	0.419328	0.837754	21017010	13992990	16975000	20103990	13780000	14562010	13342000	18465010	17.6	33.428		12.6411	0.61769	0.356369	no	down
BLVRB	Flavin reductase (NADPH)	5	4	0.124484	0.335648	0.752625	25347010	19226010	15031010	19894010	11362000	17187010	12817000	18680990	39.3	22.119		13.4488	0.886679	0.158892	no	down
BMP2K	BMP-2-inducible protein kinase	8	8	0.742804	0.878915	0.942385	8990405	8202804	5653802	5962597	5170602	9534896	6359900	6253502	10.2	129.17		40.2878	-0.736644	0.0266644	no	up
BMP7	Bone morphogenetic protein 7	1	1	0.994893	0.998383	0.998704	839330	1468217	1699313	1032900	877130	1395101	1292599	1360405	3	49.198		33.1522	0.914145	0.0111951	no	down
BMPR1A	Bone morphogenetic protein receptor type-1A	8	8	0.799244	0.90864	1.03936	13460000	15333000	14167000	10677000	13792010	19490000	12131010	11172000	20.5	60.197		104.634	-0.235739	0.42342	no	up
BMS1	Ribosome biogenesis protein BMS1 homolog	35	35	0.00553821	0.0658546	0.824148	206760100	218589900	241230100	230369900	173470100	176060100	194740000	194820100	36	145.81		173.375	-0.157894	0.56998	no	up
BNC2	Zinc finger protein basonuclin-2	4	4	0.074207	0.249826	1.8867	643963	1523199	1681001	1173455	1941100	1800000	4039602	1737016	5.6	122.33		62.2414	-0.599369	0.0388521	no	up
BNIP1	Vesicle transport protein SEC20	6	4	0.348811	0.597406	1.30488	5728198	6163502	6234104	2466901	8989905	5790903	4713002	6415900	35.1	26.132		4.71564	-0.423823	0.751565	no	up
BNIP3	BCL2/adenovirus E1B 19 kDa protein-interacting protein 3	5	3	0.602655	0.797679	1.20646	39767980	12619000	11774000	39506020	25434990	28635000	26022990	26092000	17.8	27.832		345.369	-0.40384	0.418846	no	up
BOD1L1	Biorientation of chromosomes in cell division protein 1-like 1	70	69	0.191246	0.428592	0.936935	100270000	98019020	111820000	95955960	92480050	89364970	96527010	101870000	31.4	330.46		212.354	-0.380162	0.150642	no	up
BOK	Bcl-2-related ovarian killer protein	4	4	0.0487473	0.2009	3.21509	882606	342666	3215640	653444	2704700	2652401	2811400	3366699	23.6	23.28		33.4233	0.453615	0.310035	no	down
BOLA2	BolA-like protein 2	3	3	0.949749	0.98215	1.03671	123300000	63674960	26562010	33752020	138129900	86520980	23314990	29179010	39.5	10.116		35.5691	0.529626	0.219181	no	down
BOP1	Ribosome biogenesis protein BOP1	21	21	0.558799	0.769384	0.921667	151120000	166829900	207059900	180020000	129460000	136519900	187320100	204830000	38.7	83.629		203.205	-0.320659	0.16331	no	up
BORA	Protein aurora borealis	1	1	0.415731	0.65364	1.25769	673727	940473	843130	1141001	896583	2215931	753595	1018643	5	61.202		27.4274	0.134092	0.857007	no	down
BPHL	Valacyclovir hydrolase	4	3	0.148037	0.36735	0.598392	18424990	18271990	6703004	12008000	9500004	11671000	6519103	4806802	13.4	32.542		17.529	0.202168	0.784106	no	down
BPNT1	3(2),5-bisphosphate nucleotidase 1	6	6	0.0786643	0.259006	0.716076	46165990	42784020	33103010	44068010	21089990	38912020	26332010	35057990	25.6	33.392		11.1114	-0.845551	0.218805	no	up
BPTF	Nucleosome-remodeling factor subunit BPTF	65	65	0.00258916	0.050544	1.37544	119830000	140630000	160640000	133830000	194470100	178590100	196630100	189870000	25.3	338.26		483.381	0.0108845	0.972633	no	down
BRAF	Serine/threonine-protein kinase B-raf	6	2	0.445242	0.677736	1.20058	2436800	1726699	1997101	2938100	2230500	1750100	3136999	4188801	9.4	84.436		21.4463	-0.117045	0.871754	no	up
BRAP	BRCA1-associated protein	10	10	0.5825	0.785284	0.921581	14080010	10697000	9545706	10127000	12305010	11415000	7425804	10069000	18.4	67.304		32.694	-0.275118	0.566076	no	up
BRAT1	BRCA1-associated ATM activator 1	16	16	0.659258	0.831925	0.898451	21350000	23986990	18756990	24960990	10508010	21139990	24380990	28846990	29.6	88.118		104.237	0.328089	0.311412	no	down
BRCA1	Breast cancer type 1 susceptibility protein	15	15	0.0810573	0.262788	2.02545	1927600	6051303	5673000	4445399	4616002	12294000	8959104	9737605	12.3	207.72		66.0618	0.345016	0.311554	no	down
BRCA2	Breast cancer type 2 susceptibility protein	25	24	0.989631	0.996741	1.00738	2107400	6827404	7447897	6695201	1405533	5855301	9909097	9060303	9.3	384.2		96.1749	-0.212162	0.565164	no	up
BRCC3	Lys-63-specific deubiquitinase BRCC36	5	5	0.430479	0.668248	0.906413	6434001	6600101	6143099	7379005	4328899	6841500	6500900	6748700	19.3	36.072		6.16716	-0.0200664	0.989338	no	up
BRD1	Bromodomain-containing protein 1	15	14	0.00659874	0.072297	2.04741	11478000	10973000	15599010	19907000	36966010	24733990	32004010	23486010	14.6	119.52		109.77	0.0321637	0.938382	no	down
BRD2	Bromodomain-containing protein 2	25	5	0.138875	0.352892	1.31367	9028604	13796000	12278000	11441000	12206990	12317000	21309000	16264010	40.6	88.06
BRD3	Bromodomain-containing protein 3	24	16	0.00594687	0.068	1.27948	82347060	92664000	84065040	75015950	102080000	113840000	114230000	97151020	37.7	79.541		106.481	-0.136627	0.691824	no	up
BRD4	Bromodomain-containing protein 4	31	24	0.125029	0.335819	1.18208	147950100	132040100	130560100	118680000	179360100	143580100	178330100	128690100	24.4	152.22		170.875	-0.639035	0.000561773	no	up
BRD7	Bromodomain-containing protein 7	19	10	0.0776665	0.25672	1.23062	18969010	21663990	27019010	23706000	30323990	28038020	30503000	23277010	39.8	74.138		110.303	-0.253688	0.41615	no	up
BRD8	Bromodomain-containing protein 8	12	5	0.00720347	0.0762416	1.48338	7456301	6104602	8313598	7393604	12407000	8912004	11897010	10298000	17	135.33		58.2681	-0.261817	0.491115	no	up
BRD9	Bromodomain-containing protein 9	10	10	0.31576	0.564921	1.18481	5569597	7968900	7605201	4598398	6336903	7107703	9396900	7226800	28.3	66.999		51.9135	-0.269804	0.48507	no	up
BRE	BRCA1-A complex subunit BRE	7	7	0.673713	0.838055	0.92676	12579010	9885596	11608000	16983000	8330002	12528010	11192000	15483000	19.1	43.551
BRF1	Transcription factor IIIB 90 kDa subunit	1	1	0.976484	0.990351	1.00891	1314435	845280	1084142	1103299	628084	1614500	1856100	731587	1.5	73.798		20.3313	-0.306387	0.615875	no	up
BRI3BP	BRI3-binding protein	3	3	0.120071	0.328389	0.775643	28491020	32836990	24480020	24412020	18925000	28295000	23266000	16242990	16.7	27.835		27.2849	-0.787221	0.0511811	no	up
BRIP1	Fanconi anemia group J protein	5	5	0.271445	0.52494	1.42617	692488	1753774	835989	1714400	1783999	2337100	1651001	1046085	4.6	140.87		36.7319	0.530113	0.191591	no	down
BRIX1	Ribosome biogenesis protein BRX1 homolog	20	20	0.405562	0.643879	0.82794	151260000	187019900	264999900	201830100	99641000	170950000	181769900	229620100	57.2	41.401		56.634	-0.355802	0.422934	no	up
BRMS1	Breast cancer metastasis-suppressor 1;Breast cancer metastasis-suppressor 1 homolog	2	2	0.666109	0.834429	0.39374	5447803	437430100	3459700	339030000	453449	661970100	3726199	60063960	8.9	28.46		22.2865	-0.338305	0.566076	no	up
BRMS1L	Breast cancer metastasis-suppressor 1-like protein	5	5	0.315293	0.564203	1.4737	1881501	5326200	7243204	3524901	3490399	7055200	8925399	5490703	16.7	37.629		7.3858	0.000149869	0.999866	no	down
BROX	BRO1 domain-containing protein BROX	7	7	0.948384	0.981535	1.01548	13457010	18495010	13801000	20723000	24394010	9711904	15598000	20483000	27	46.476		13.1687	-0.228041	0.788495	no	up
BRPF1	Peregrin	11	9	0.14276	0.358589	1.32271	3617200	2705100	4116798	2920302	3005200	4517598	5735897	4624003	9.9	137.31		72.2606	-0.193168	0.576665	no	up
BRPF3	Bromodomain and PHD finger-containing protein 3	14	6	0.377948	0.61933	1.19857	6923601	6908003	7121700	3982201	6928802	8390505	9289104	5183600	15.9	135.74		77.0011	-0.0284785	0.946842	no	up
BRWD1	Bromodomain and WD repeat-containing protein 1	22	19	0.0817251	0.264916	1.56979	5141597	9382699	10009000	5218503	7866297	11986000	13176000	12317000	11.7	262.93		101.069	-0.245269	0.465631	no	up
BRWD3	Bromodomain and WD repeat-containing protein 3	10	3	0.0344819	0.171014	1.67584	476450	577280	951271	828449	1180081	1308753	847860	1305601	8.3	203.6		84.2165	-0.0528566	0.914953	no	up
BSCL2	Seipin	2	2	0.867181	0.943831	0.955748	8872397	4767499	11340000	6953497	10433010	8757097	6745400	4515902	4.5	44.392		81.5892	-0.531702	0.0416924	no	up
BSDC1	BSD domain-containing protein 1	13	13	0.0436156	0.193665	0.671971	16909000	20296010	23548000	20663990	9009097	16173010	14268990	16377000	41.4	47.163		34.1828	-0.23379	0.65227	no	up
BSG	Basigin	13	13	0.15711	0.38036	1.09366	764780000	648140100	698120300	608519800	712479700	786679600	708240400	758909900	37.9	42.2		538.49	0.0853537	0.741162	no	down
BST2	Bone marrow stromal antigen 2	2	2	0.761635	0.886364	1.12815	3044800	895993	2962000	1637900	3394099	3151298	1567299	1278900	13.9	19.769		34.0955	3.02732	1.06632e-13	yes	down
BTAF1	TATA-binding protein-associated factor 172	32	32	0.516352	0.739208	1.08416	28224010	40428020	37759980	45126010	34570980	39433010	43133020	45683000	21.3	206.89		142.914	0.43562	0.0578784	no	down
BTBD2	BTB/POZ domain-containing protein 2	5	4	0.0305641	0.161904	1.58323	2315201	1394999	1617600	1720201	2153862	3260301	2284401	3520002	12.4	55.931		108.251	1.50259	7.60405e-11	yes	down
BTD	Biotinidase	2	2	0.003498	0.057973	1.50307	1694001	1453400	1466500	1206600	1923300	2418701	2055500	2325499	5.5	61.132		24.1091	0.420457	0.421275	no	down
BTF3	Transcription factor BTF3	10	10	0.815161	0.918898	0.95855	92326000	58341970	69154040	65513990	94353040	51269010	55201000	77153950	65	22.168		257.179	-0.22322	0.376451	no	up
BTF3L4	Transcription factor BTF3 homolog 4	8	8	0.528767	0.747753	0.867744	41828020	75688990	58341970	38353980	68003960	36320980	38123000	42655980	55.7	17.27		34.8953	-0.0749183	0.900472	no	up
BTRC	F-box/WD repeat-containing protein 1A	4	2	0.853946	0.935827	1.06894	905903	536950	1241370	267770	705236	649229	548419	840699	7.9	68.866		19.1463	0.109166	0.896523	no	down
BUB1	Mitotic checkpoint serine/threonine-protein kinase BUB1	11	11	0.212759	0.454845	0.772931	14266000	18378010	18810010	19193000	8604496	13164000	15373000	19400990	14.3	122.37		177.119	0.536171	0.00289136	no	down
BUB1B	Mitotic checkpoint serine/threonine-protein kinase BUB1 beta	37	34	0.398454	0.637213	1.05639	68341040	72070970	69073990	76520980	80980990	76645010	64364000	81157940	47.4	119.54		187.826	0.096834	0.780156	no	down
BUB3	Mitotic checkpoint protein BUB3	13	13	0.824858	0.923019	0.978298	254499900	269819900	274149900	360450100	300469900	243430100	273599900	310590000	46	36.954		171.996	0.229981	0.335541	no	down
BUD13	BUD13 homolog	13	13	0.731659	0.875188	1.02469	23136000	25132020	25191990	28074000	25229990	24178980	30537010	24337000	23.9	70.52		44.2821	-0.345295	0.378744	no	up
BUD31	Protein BUD31 homolog	6	6	0.479142	0.707565	0.814211	20047990	20107000	25365010	23474990	8475896	19264000	22079990	29260020	34	17		31.1973	-0.306129	0.535241	no	up
BYSL	Bystin	18	18	0.0795573	0.261094	0.818607	162570000	202390100	222480100	193119900	155640100	132979900	184360000	166370000	46	49.601		79.3081	-0.315245	0.272949	no	up
BZW1	Basic leucine zipper and W2 domain-containing protein 1	23	22	0.127992	0.341357	0.86601	314999800	326470000	270720000	365930100	240770000	265620100	297589900	301079900	55.6	48.043		240.942	-0.45505	0.015829	no	up
BZW2	Basic leucine zipper and W2 domain-containing protein 2	18	17	0.0371675	0.178612	1.16969	124590000	119739900	114260100	131160000	154859900	154290000	124730000	140429900	38.9	48.162		118.24	0.115973	0.728399	no	down
C10ORF35	Uncharacterized protein C10orf35;Uncharacterized protein C10orf35 homolog	2	2	0.0270767	0.151671	1.42861	3888698	4617802	4914798	3235701	7091100	5689201	6085697	4845000	22.3	13.238
C10ORF76	UPF0668 protein C10orf76;UPF0668 protein C10orf76 homolog	7	7	0.49831	0.724403	0.752686	4062600	11042000	6420499	5038000	2128999	3659602	9928701	6020501	14.8	78.71
C11ORF52	Uncharacterized protein C11orf52	1	1	0.271276	0.524945	2.66841	967570	35637	207994	608679	769472	1661968	321965	537536	8.1	13.92
C11ORF54	Ester hydrolase C11orf54	4	4	0.0635839	0.227353	1.44946	10168000	8804798	6352102	5281198	11936000	11506000	8877701	10873000	14	35.117
C11ORF57	Uncharacterized protein C11orf57	3	3	0.162782	0.389405	1.65419	733340	1119142	1228800	530620	1494701	975430	2806943	979060	11.6	34.109
C11ORF68	UPF0696 protein C11orf68;UPF0696 protein C11orf68 homolog	5	5	0.366691	0.613073	0.762583	10910010	4519898	5124997	5853900	3444202	5643698	3390798	7590796	19.5	31.43		25.1985	0.163735	0.801569	no	down
C11ORF84	Uncharacterized protein C11orf84	11	9	0.0202455	0.131995	0.725182	18853000	25014010	25028000	26518010	15724010	14858010	19590000	18912990	49.3	41.036
C11ORF98	Uncharacterized protein C11orf98	9	9	0.321915	0.572115	1.28359	87173950	44210980	76912990	99016060	84650000	67175970	134780000	103959900	48	14.234		12.4738	-0.856606	0.198453	no	up
C12ORF10	UPF0160 protein MYG1, mitochondrial	11	6	0.00341683	0.0582083	0.582836	37759980	52713960	46949980	57395000	24675010	26554990	34383010	27473010	38.8	42.477		63.5615	0.291219	0.378495	no	down
C12ORF4	Protein C12orf4;Protein C12orf4 homolog	3	3	0.708277	0.860181	0.902962	981430	1287639	2058701	2084500	886775	1348301	2170200	1389400	9.1	63.8		12.3623	-0.475765	0.517745	no	up
C12ORF43	Uncharacterized protein C12orf43	9	9	0.146354	0.364919	1.17821	14514990	19751990	22839000	18142010	21627010	20420000	22633010	22903010	40.8	28.17		11.7006	-0.114796	0.903995	no	up
C12ORF45	Uncharacterized protein C12orf45	7	7	0.260572	0.514292	0.731493	14942990	14784000	13890000	19593000	12608990	9442805	6831801	21162000	34.1	20.123		16.7872	-0.439857	0.542192	no	up
C14ORF1	Probable ergosterol biosynthetic protein 28	3	3	0.985328	0.994663	1.01621	1110695	10545000	8313202	9894199	880553	7588799	16516990	9307999	22.9	15.864
C14ORF119	Uncharacterized protein C14orf119;Uncharacterized protein C14orf119 homolog	1	1	0.362086	0.610292	1.23202	428728	301832	711620	545000	670659	447260	716380	538100	8.6	16.009		41.5248	0.354953	0.486286	no	down
C14ORF159	UPF0317 protein C14orf159, mitochondrial	6	6	0.249374	0.498881	0.605233	4444200	2285700	3128500	3654501	1184727	1023105	4992099	2575401	10.2	66.436
C14ORF166	UPF0568 protein C14orf166;UPF0568 protein C14orf166 homolog	9	9	0.534378	0.751662	0.902444	19278010	24488010	30362020	29100000	25811000	18137000	19717990	29969990	42.6	28.068
C15ORF39	Uncharacterized protein C15orf39	6	5	0.372605	0.614974	0.759332	1373700	1735701	4477000	2235200	2083641	1402900	1292500	2099499	8.1	110.67		185.401	-1.18302	8.23274e-09	yes	up
C15ORF40	UPF0235 protein C15orf40	2	2	0.678713	0.84124	0.780055	650498	642343	2255800	2671899	786030	931796	412511	3086301	19.6	16.353		6.29337	0.616043	0.562501	no	down
C15ORF52	Uncharacterized protein C15orf52	1	1	0.59521	0.793888	1.59817	92649060	9232503	2486199	13005000	61985010	14642010	11875010	16740990	1.9	57.324
C16ORF13	UPF0585 protein C16orf13	8	8	0.084195	0.268233	0.849242	8189000	7858398	6492096	7976900	5505299	7301796	6554700	6578801	48	22.578
C16ORF58	RUS1 family protein C16orf58	5	5	0.57291	0.778688	1.24649	2768298	2042600	2101801	2747799	8016302	3218498	1681201	1817500	14.1	51.017		24.472	-0.0671818	0.923003	no	up
C16ORF59	Uncharacterized protein C16orf59	3	3	0.0113868	0.0956673	2.01182	537310	456195	490833	589650	1719007	1008900	701500	955220	9.7	46.402
C16ORF62	UPF0505 protein C16orf62;UPF0505 protein C16orf62 homolog	18	18	0.0257439	0.148993	0.720205	14954000	17541000	16886010	22476990	11096000	13852000	15000000	11618000	22.3	109.56
C16ORF72	UPF0472 protein C16orf72;UPF0472 protein C16orf72 homolog	1	1	0.138578	0.352495	0.509534	625612	1541699	583472	1397606	1163082	312180	367001	397850	6.5	30.925		81.6689	-0.431285	0.11071	no	up
C17ORF59	Uncharacterized protein C17orf59	5	5	0.00346061	0.0580952	1.49035	4123798	4649603	4000200	3193199	6093902	6380399	5489803	5660803	20.4	37.226
C17ORF62	Uncharacterized protein C17orf62	6	4	0.797761	0.907753	0.953107	7582200	9683903	10305000	6584900	11451000	6874603	8845904	5904399	33.7	20.774
C17ORF75	Protein Njmu-R1	10	10	0.222376	0.466256	0.875854	13231000	14563010	14192010	14298000	11874000	10374000	11560010	16158000	35.1	44.621		32.3435	0.209287	0.708647	no	down
C17ORF80	Uncharacterized protein C17orf80	6	6	0.432708	0.669191	0.857005	3667802	4749299	3550001	2790201	4045401	2664699	2209200	3908299	13	67.314		40.7037	-0.0918421	0.865083	no	up
C17ORF85	Uncharacterized protein C17orf85	18	9	0.474534	0.704216	1.30537	25612010	17797000	6162198	16419990	12394000	27901010	21722010	17827990	35.3	70.592
C18ORF21	UPF0711 protein C18orf21	8	8	0.977257	0.990763	1.009	8838703	4206399	8057103	12470990	10011000	5126203	12034000	6270001	32.7	24.826		25.113	-0.48768	0.341508	no	up
C18ORF25	Uncharacterized protein C18orf25	7	7	0.0041202	0.0585089	0.676142	13987000	10167010	12876000	12876000	9799000	8201297	7813705	7847102	25	43.395		20.8263	-0.266368	0.663697	no	up
C18ORF8	Uncharacterized protein C18orf8	10	10	0.0588921	0.218967	0.754658	5842102	6616097	6202002	6770900	4101001	4034500	4776799	6660901	21.2	74.974
C19ORF43	Uncharacterized protein C19orf43	7	7	0.731778	0.875255	0.925145	22296010	21640000	29317020	44188020	33211990	19064000	22124000	32687000	36.4	18.419
C19ORF47	Uncharacterized protein C19orf47	5	5	0.0557578	0.213685	0.472524	2264501	2923701	3474800	5883702	930175	1243546	2655601	2196801	17.1	44.746		17.8844	-0.656121	0.224289	no	up
C19ORF52	Uncharacterized protein C19orf52	8	8	0.185281	0.419714	1.1834	24097000	24021010	30895020	20456990	35344020	29963010	26771990	25305990	33.5	29.233
C19ORF54	UPF0692 protein C19orf54	2	2	0.986579	0.995486	1.00374	1171700	783590	1298000	1504900	1142800	1649600	1267401	761912	6	37.778		20.6168	-0.00294979	0.997582	no	up
C19ORF66	UPF0515 protein C19orf66;UPF0515 protein C19orf66 homolog	2	2	0.225559	0.47028	0.767857	3040199	1804699	1454300	1998601	2122799	1589899	1294600	1268801	10	33.11
C19ORF68	Uncharacterized protein C19orf68	4	4	0.94426	0.980031	1.10121	45482020	17608990	740102	35137990	31327010	29904010	38830000	841999	6.7	70.072
C1D	Nuclear nucleic acid-binding protein C1D	3	3	0.0660703	0.232094	3.17117	729282	1111125	849900	596096	9393497	873256	1819200	2782101	35.5	16.019		10.9553	-0.735796	0.292709	no	up
C1GALT1	Glycoprotein-N-acetylgalactosamine 3-beta-galactosyltransferase 1	6	6	0.282779	0.535652	0.905218	18081000	21278000	25880980	20799000	19146010	19156010	21513000	17623990	21.2	42.202		45.1044	-0.591409	0.105047	no	up
C1GALT1C1	C1GALT1-specific chaperone 1	8	8	0.798698	0.908482	1.01842	13380000	16028010	15760990	16153000	14812000	14798000	14732010	18189010	23.9	36.382		18.2566	0.737074	0.146883	no	down
C1ORF106	Uncharacterized protein C1orf106	3	3	0.230675	0.4763	0.426302	8129702	7107901	8268295	7925601	5098398	7557201	500405	6486597	5.3	72.913
C1ORF112	Uncharacterized protein C1orf112	4	4	0.785054	0.901224	1.12447	704030	1992301	2234999	3107399	1154431	1731999	1959601	3974900	5.7	96.553		22.0821	-0.170625	0.800827	no	up
C1ORF123	UPF0587 protein C1orf123	5	5	0.372506	0.615197	1.18701	26103000	46832990	36115990	53297990	53278970	46624980	36819980	51074980	45	18.048
C1ORF131	Uncharacterized protein C1orf131	8	8	0.0556298	0.213212	1.3842	9890694	8164795	7802000	9337395	10029010	10723010	17502990	11473990	25.9	32.61		9.02977	-0.119592	0.913204	no	up
C1ORF174	UPF0688 protein C1orf174	2	2	0.130157	0.34248	1.77691	14890000	3724899	12241000	12145000	17055000	17242990	13575000	20591010	13.2	25.977		16.5829	-0.0904534	0.912822	no	up
C1ORF198	Uncharacterized protein C1orf198	10	10	0.150672	0.371285	0.890686	10130000	11947000	12868000	10698000	9465203	9278598	11134000	10723010	32.1	36.346		32.99	0.659429	0.0912717	no	down
C1ORF210	Type III endosome membrane protein TEMP	1	1	0.225668	0.470435	1.65695	2207401	910889	971920	620968	814698	2694200	2160801	1928599	30.1	12.024
C1ORF226	Uncharacterized protein C1orf226	6	6	0.0505718	0.203186	1.33996	6839203	6667403	9486901	7741502	9394006	13222000	9789599	8879004	42.3	29.057		4.7994	0.461772	0.727214	no	down
C1ORF50	Uncharacterized protein C1orf50	3	3	0.857634	0.938052	1.08213	1053630	3431299	2463300	4569298	1313799	2601801	4917300	3319698	22.6	21.876		4.60827	-0.922637	0.423072	no	up
C1ORF52	UPF0690 protein C1orf52;UPF0690 protein C1orf52 homolog	7	7	0.775113	0.89509	0.976091	9225195	8850595	8052204	6951897	9179001	7890598	8001902	7158600	40.7	20.599		19.968	-0.0228221	0.97689	no	up
C1QBP	Complement component 1 Q subcomponent-binding protein, mitochondrial	9	7	0.657588	0.830827	0.914143	220919900	449119800	385749900	258170100	296979900	369189800	271140100	232110000	52.1	31.362		373.102	-0.28809	0.182886	no	up
C20ORF27	UPF0687 protein C20orf27	3	3	0.504726	0.730155	1.12237	19997010	16646990	12531000	12411990	22838000	15704000	13239000	17303990	21.8	19.291		48.6651	-0.0316594	0.956666	no	up
C21ORF2	Protein C21orf2	2	2	0.0393242	0.182474	0.653175	2694100	2345501	2518401	3416899	1355484	1824682	1544400	2591101	10.5	28.34
C21ORF59	UPF0769 protein C21orf59	10	10	0.662555	0.832474	1.0403	16381010	13379010	13646990	15195010	18145010	14874990	12785000	15425000	35.2	33.224
C2CD2	C2 domain-containing protein 2	3	3	0.128395	0.34182	1.59055	725937	1748800	2032200	1008184	2750099	1869001	1958500	1653701	7.3	75.532		15.3233	0.752883	0.191269	no	down
C2CD3	C2 domain-containing protein 3	3	2	0.839146	0.929967	1.04059	715234	1095900	1241299	1034431	952094	1575322	796140	988270	1.6	260.39		37.7423	-0.00470881	0.995519	no	up
C2CD5	C2 domain-containing protein 5	17	17	0.152128	0.373037	1.10721	29561980	36522980	34687000	33796980	40209000	38107980	32902000	37731990	22.2	110.45		78.696	-0.457958	0.0794793	no	up
C2ORF43	UPF0554 protein C2orf43	6	6	0.0835254	0.268201	1.39389	21638000	16159010	20452990	19353010	36970020	31661980	23074000	19344010	18.5	37.318
C2ORF44	WD repeat and coiled-coil-containing protein C2orf44	3	3	0.70138	0.856669	1.09879	4697898	2582101	3000401	2489399	3799902	5106702	2124101	3204199	4.3	79.135
C2ORF47	Uncharacterized protein C2orf47, mitochondrial;Uncharacterized protein C2orf47 homolog, mitochondrial	6	6	0.0505051	0.203302	0.709422	52887020	76480020	95160940	75073000	44508030	48218030	60988980	55919010	22	32.544
C2ORF49	Ashwin	9	9	0.865181	0.942447	0.965571	12596000	14175000	13610000	11439010	17752000	7516100	11495010	15753990	47	25.858		7.25156	0.0299854	0.979354	no	down
C2ORF69	UPF0565 protein C2orf69	4	4	0.168323	0.398514	0.705255	16247010	22834010	17368000	28978980	20243000	16456000	8792003	15772000	13	43.448		31.3479	-0.398658	0.361421	no	up
C3ORF17	Uncharacterized protein C3orf17	16	16	0.34126	0.588964	0.903214	42267010	42647980	44790010	43942990	35481000	39378990	51398980	32879000	31.2	64.551
C3ORF38	Uncharacterized protein C3orf38	5	5	0.602444	0.797683	0.831086	3706502	2751299	2093800	2214100	1412337	4988800	2467801	1297100	22.8	37.54		27.0199	-0.318274	0.574157	no	up
C3ORF58	Deleted in autism protein 1;Deleted in autism protein 1 homolog	6	6	0.0111285	0.0955668	1.87969	6314599	5915103	5126800	7325002	11440000	17271990	11092010	7989703	16	49.481
C4ORF27	UPF0609 protein C4orf27;UPF0609 protein C4orf27 homolog	11	11	0.0673812	0.234594	1.45375	20007000	16084000	20597000	19388990	33753980	26819990	17772990	35673990	39.3	39.436
C4ORF29	Uncharacterized protein C4orf29;Uncharacterized protein C4orf29 homolog	2	2	0.476346	0.705576	0.908576	3113502	3019198	2155101	2358599	2551299	2882900	1902399	2327101	3.9	46.954
C5ORF22	UPF0489 protein C5orf22	6	6	0.929488	0.973765	1.02518	4667402	7733696	8741400	10293000	4439502	8584702	7754296	12139000	19	49.967		23.5211	-0.232786	0.695254	no	up
C5ORF45	UPF0544 protein C5orf45	3	3	0.0809677	0.26244	0.67553	2210342	1122500	1159000	1643900	1097400	757250	1006900	1176499	13.1	37.743
C5ORF51	UPF0600 protein C5orf51	3	3	0.73595	0.877252	1.33206	6318198	2636601	55772970	1686700	7263495	13441010	10836000	4663898	12.9	33.62		16.6734	0.028724	0.971271	no	down
C6ORF120	UPF0669 protein C6orf120	1	1	0.769017	0.891376	0.779524	944795	933446	7417405	5670698	2119179	1939104	436200	7641504	14.1	20.772		52.5511	0.214225	0.665626	no	down
C6ORF132	Uncharacterized protein C6orf132	24	24	0.223249	0.46786	0.896359	37352990	29963010	35970980	27833000	32253000	29099000	28778010	26782010	29.4	124.03		108.101	-0.0103511	0.978201	no	up
C6ORF47	Uncharacterized protein C6orf47	1	1	0.867902	0.944304	0.974206	1041600	1059200	1733901	1744099	1353400	1243099	1232500	1449300	4.4	31.71
C7ORF26	Uncharacterized protein C7orf26;Uncharacterized protein C7orf26 homolog	3	3	0.539953	0.755319	1.14104	1971799	2429399	2263002	1816801	2526454	1532199	2217800	3888698	8.2	50.046		33.5286	-0.654761	0.0844974	no	up
C7ORF50	Uncharacterized protein C7orf50	11	11	0.141884	0.357868	1.10267	99470950	96248950	81391980	93318040	108740000	99455960	107400000	92556010	59.8	22.083		45.6934	0.355009	0.31687	no	down
C7ORF55	UPF0562 protein C7orf55	1	1	0.512244	0.736837	1.78639	6544898	515717	1049738	8976604	7192600	6308899	1070949	6665103	9.7	12.749
C8ORF33	UPF0488 protein C8orf33	6	6	0.191784	0.429194	0.865179	11988000	10605000	8732402	11834010	11227000	8335896	8827900	8909895	35.8	24.992		46.4707	-0.432011	0.218209	no	up
C8ORF37	Protein C8orf37	1	1	0.925854	0.971757	1.04937	905699	1631658	411870	772408	2764261	723982	405670	702180	7.2	23.38
C8ORF59	Uncharacterized protein C8orf59	5	5	0.533176	0.750346	0.698115	4533303	2222200	6056201	10349000	956793	4380703	6357403	5628103	46	11.456
C9ORF114	Putative methyltransferase C9orf114	10	10	0.860714	0.940155	1.04476	20488990	22355990	26415000	22918000	12256010	28406990	35956010	26391010	31.4	42.008
C9ORF142	Protein PAXX	3	3	0.164006	0.391541	1.59178	5961099	2650199	3357201	3156001	8440705	8591605	3399201	4359401	19.1	21.639
C9ORF41	UPF0586 protein C9orf41	5	2	0.771864	0.89349	0.843591	990284	699829	1025513	2317501	1409114	231634	1077399	2372001	10.8	47.185
C9ORF64	UPF0553 protein C9orf64	11	11	0.00235519	0.0479655	0.0786808	24814990	11497000	13406010	27168020	379581	3117299	1896801	1774299	38.7	39.028		8.14738	-6.4439	3.43043e-07	yes	up
C9ORF72	Protein C9orf72	1	1	0.697233	0.854284	0.860972	1970400	1260899	1761100	1688199	2550399	2051699	516460	1501901	2.3	54.327		17.4442	0.322298	0.624972	no	down
C9ORF78	Uncharacterized protein C9orf78;Uncharacterized protein C9orf78 homolog	12	12	0.465979	0.697272	0.800245	15168010	27366000	34527000	28921000	10690000	20915010	26805990	28362000	49.5	33.688		31.5242	-0.0782759	0.902764	no	up
C9ORF89	Bcl10-interacting CARD protein	3	3	0.474784	0.704217	0.651121	5591103	4363103	1030432	3639101	3556399	580530	2807801	2836301	13.2	25.589
C9ORF91	Transmembrane protein C9orf91	1	1	0.172437	0.403601	1.73753	446690	402860	670077	413926	550840	530590	2214946	702724	4.1	37.569
CA14	Carbonic anhydrase 14	5	5	0.321236	0.571137	1.35609	18526990	20813000	11284990	9434494	27996010	23524010	10788000	19542010	13.6	37.667		21.8784	0.520572	0.345211	no	down
CA2	Carbonic anhydrase 2	10	10	0.590896	0.79141	1.1415	16199010	23202010	17222990	20976010	11797000	24718990	24170990	32708010	53.5	29.246		7.29486	0.687678	0.44624	no	down
CA5B	Carbonic anhydrase 5B, mitochondrial	4	1	0.746561	0.880106	0.805235	3166199	1611499	597794	198313	772884	625331	1205878	436350	15.8	36.433		10.1642	-0.249501	0.796204	no	up
CA8	Carbonic anhydrase-related protein	2	2	0.0783781	0.258463	1.89368	1558674	823413	869328	426195	1133065	1786100	1386600	2179101	11	32.973
CAAP1	Caspase activity and apoptosis inhibitor 1	6	6	0.7711	0.89308	1.03077	22473990	28288000	33637000	24988000	24136980	29114000	30020990	28593010	21.9	38.367		37.3896	-0.231447	0.622701	no	up
CAB39	Calcium-binding protein 39	14	12	0.143617	0.359876	0.908361	73438020	85642970	71369020	68256980	72744020	63172030	67787010	66962980	37	39.869		35.1384	-0.509338	0.217487	no	up
CABIN1	Calcineurin-binding protein cabin-1	28	28	0.00230025	0.0483348	1.84607	15111010	15020000	11724990	12993000	19415000	27976990	31337990	23592000	16	246.35		267.341	0.0833544	0.782636	no	down
CABLES2	CDK5 and ABL1 enzyme substrate 2	1	1	0.239582	0.48589	1.38017	947671	1919300	1327500	2216745	2107701	2377999	2840399	1364202	2.5	52.235		10.404	0.296658	0.748101	no	down
CACHD1	VWFA and cache domain-containing protein 1	13	13	0.187877	0.422732	1.17306	4681300	4012303	6048000	5567897	5482803	5235199	6262802	6662601	12.7	142.29		104.244	-0.116696	0.744998	no	up
CACNA2D1	Voltage-dependent calcium channel subunit alpha-2/delta-1;Voltage-dependent calcium channel subunit alpha-2-1;Voltage-dependent calcium channel subunit delta-1	19	3	0.217229	0.459968	1.73778	9443404	5046699	4017903	12259990	24825000	5728902	10778000	13967010	20.9	124.57		23.9586	-0.0550934	0.94017	no	up
CACNA2D2	Voltage-dependent calcium channel subunit alpha-2/delta-2;Voltage-dependent calcium channel subunit alpha-2-2;Voltage-dependent calcium channel subunit delta-2	12	11	0.0418013	0.188147	1.52753	6560604	6280803	4980003	8356795	11890010	12312000	8722698	7311804	12.9	129.82		29.7866	0.686108	0.0938569	no	down
CACTIN	Cactin	13	13	0.315327	0.564153	0.821666	12974990	20598010	16367000	17239000	9244595	12754000	18882990	15437990	21.5	88.701		65.1708	-0.00403152	0.994754	no	up
CACUL1	CDK2-associated and cullin domain-containing protein 1	5	5	0.713119	0.862879	0.94693	2424499	1530300	1870699	1894100	1696074	2223899	1379700	2031101	20.1	41.063		21.4528	-0.438564	0.409952	no	up
CACYBP	Calcyclin-binding protein	16	8	0.93475	0.975631	1.01253	132170000	137320000	147820100	152140000	133990100	214230000	109100000	136990000	66.2	26.21		93.1618	0.0176694	0.969986	no	down
CAD	CAD protein;Glutamine-dependent carbamoyl-phosphate synthase;Aspartate carbamoyltransferase;Dihydroorotase	79	76	0.0704191	0.240694	1.1222	879670000	876399900	795689700	866939800	862889700	1049000000	909840100	1024100000	46.5	242.98		374.444	0.232992	0.335032	no	down
CADM1	Cell adhesion molecule 1	7	7	0.0377408	0.179141	1.57138	8786298	5946498	8046702	5590002	14852000	12189000	9505394	8327095	17.9	48.509		15.7505	-0.498862	0.43516	no	up
CADM4	Cell adhesion molecule 4	4	4	0.0306936	0.162172	2.09534	1040086	1064500	931860	1627500	1581116	4566200	2398202	1869401	13.4	42.723		7.6791	1.80662	0.0164162	yes	down
CADPS2	Calcium-dependent secretion activator 2	4	3	0.230023	0.475641	0.637672	993000	488198	1772004	1803721	900344	856510	665390	499287	4.3	147.73		20.7569	0.734633	0.11557	no	down
CALB1	Calbindin	8	8	0.118445	0.325205	1.69856	9836395	12815000	9406596	11262990	9175798	20903010	16217010	35739000	31.8	30.025
CALCOCO1	Calcium-binding and coiled-coil domain-containing protein 1	6	6	0.993672	0.998152	0.996658	1166884	541565	1359299	1579201	1134116	908827	516969	2511963	11.3	77.335		11.3463	0.542924	0.457089	no	down
CALCOCO2	Calcium-binding and coiled-coil domain-containing protein 2	3	3	0.329959	0.578081	0.728901	1025298	966260	1342541	1112699	1236512	355367	798110	1191200	11.4	52.253		10.0306	0.068875	0.953586	no	down
CALD1	Caldesmon	43	43	0.0156765	0.117021	0.657446	781629800	950109600	657260100	541929800	523000300	458049800	438180300	470790100	39.8	93.23		122.448	-0.680542	0.0034827	no	up
CALML5	Calmodulin-like protein 5	1	1	0.434178	0.670661	0.708132	2547201	1291800	1092200	485813	840101	1390199	838850	448120	9.6	15.892
CALR	Calreticulin	26	10	0.966208	0.987465	1.00575	1096300000	1087500000	777610000	1294200000	1243300000	1121500000	883149500	996959500	78.4	48.141		677.464	-0.21175	0.24214	no	up
CALR3	Calreticulin-3	1	1	0.975949	0.990748	0.968333	21748010	1511458	1767769	7074105	29136990	6058804	3531300	579756	7.6	44.995
CALU	Calumenin	23	7	0.0895994	0.277441	1.19235	103640100	137789900	151619900	133020000	168430000	144519900	155660000	153640000	63.2	37.106		82.7204	-0.114237	0.782798	no	up
CAMK2G	Calcium/calmodulin-dependent protein kinase type II subunit gamma	9	8	0.841921	0.930866	1.02069	9993203	8449001	11025990	8917001	11010000	8944405	8157900	11215000	24.6	59.606		18.6789	0.990679	0.0337323	no	down
CAMKK2	Calcium/calmodulin-dependent protein kinase kinase 2	5	5	0.607536	0.800687	1.48153	3341000	883035	1376399	770420	3568999	6859196	340017	1810700	10.4	64.745		47.8846	0.915378	0.00113208	no	down
CAMKMT	Calmodulin-lysine N-methyltransferase	4	4	0.454495	0.687576	0.655358	1464739	5921198	2692402	892985	1859878	2899999	1189276	599656	21.4	36.128		5.52459	0.207294	0.880508	no	down
CAMKV	CaM kinase-like vesicle-associated protein	17	17	0.045667	0.19619	0.882225	42552010	39223990	44316030	39222020	40683020	36074000	33815980	35412020	58.3	54.353		36.005	0.701174	0.0466592	no	down
CAML2D	Calcium/calmodulin-dependent protein kinase type II subunit delta	8	7	0.0197057	0.130456	2.29056	2692501	4212799	5782801	2688802	10200000	11419000	8410195	4956298	19.8	56.369
CAMLG	Calcium signal-modulating cyclophilin ligand	6	6	0.196525	0.434058	0.778822	4204798	5681602	7077500	6988102	3316899	4310800	5395700	5634699	31.8	32.952		42.06	-0.163826	0.730428	no	up
CAMSAP1	Calmodulin-regulated spectrin-associated protein 1	22	22	0.009956	0.0904848	1.49957	8368603	12059000	11522000	12502000	19221000	14772010	15342000	16875010	20.6	177.97		172.78	-0.354467	0.111462	no	up
CAMSAP2	Calmodulin-regulated spectrin-associated protein 2	7	7	0.915506	0.966527	1.05114	1478400	1757399	1753699	1806901	2832899	2148799	478781	3448499	7.3	168.09		73.3506	-0.270655	0.515419	no	up
CAMSAP3	Calmodulin-regulated spectrin-associated protein 3	22	22	0.073837	0.24899	1.16705	28045990	24133000	23148000	28281010	33795020	28711010	26959990	31422000	28.3	134.75		50.4731	0.807291	0.00498298	no	down
CAND1	Cullin-associated NEDD8-dissociated protein 1	49	2	0.545711	0.76012	1.53512	88813050	124640000	280120100	19849000	70564030	94035980	393970000	130750100	41.8	136.37		385.059	0.277666	0.168944	no	down
CAND2	Cullin-associated NEDD8-dissociated protein 2	20	15	0.0824994	0.265852	0.792707	15180010	12912000	13653000	13206000	13926000	11640000	8443205	10196000	18.6	135.25		29.5354	0.30155	0.572227	no	down
CANT1	Soluble calcium-activated nucleotidase 1	7	7	0.000473112	0.0309268	1.53826	4847800	5006203	4501203	4294099	7388396	7848005	7353101	6160097	22.2	44.839		37.2239	-0.217569	0.660627	no	up
CANX	Calnexin	44	24	0.120589	0.328737	0.771221	767130300	1016500000	1383500000	1173299000	936269800	686110000	896550100	777519600	48.8	67.567		410.425	-0.468976	0.00289474	no	up
CAP1	Adenylyl cyclase-associated protein 1	25	11	0.784629	0.901074	0.968763	568079700	569559700	566220200	524960000	460890300	451329900	564310000	721640200	56	51.901		162.521	-0.373884	0.100752	no	up
CAP2	Adenylyl cyclase-associated protein 2	9	8	0.887899	0.951916	1.01854	9606704	9849303	9308295	9250598	9616806	10831990	6876202	12242000	23.5	52.823		9.15058	1.0957	0.13554	no	down
CAPG	Macrophage-capping protein	12	9	0.00802328	0.0808681	0.53532	115560000	108480000	108680000	163559900	45194020	70575980	71329030	80432980	47.4	38.498		31.8505	-0.0906834	0.879369	no	up
CAPN1	Calpain-1 catalytic subunit	32	32	0.816607	0.919216	0.976209	199739900	198390100	161609900	216529900	157710000	185160000	187470000	230040000	42.7	81.889		178.418	-0.0995452	0.745876	no	up
CAPN15	Calpain-15	6	6	0.607684	0.800695	0.9204	11155010	8211202	7682204	11202000	7713805	12254000	7432601	8051502	8.4	117.31		176.749	-0.0340362	0.936145	no	up
CAPN5	Calpain-5	11	11	0.0803116	0.261958	0.60241	32372020	32885000	42156010	20677000	10654010	22604990	20824010	24367000	23	73.168		34.7536	-0.438949	0.275843	no	up
CAPN6	Calpain-6	8	8	0.621384	0.806707	1.12988	17780000	11188990	7213303	13499010	17496000	15945010	9589002	11802010	13.9	74.576		10.1503	-0.150494	0.891724	no	up
CAPNS1	Calpain small subunit 1	10	8	0.58466	0.786635	0.891934	50337980	54053020	24554990	50123020	42808970	32026020	36562980	42280980	59.3	28.315		86.9452	-0.290553	0.331072	no	up
CAPRIN1	Caprin-1	20	20	0.318692	0.56871	1.19337	207990000	283420200	321030000	381860000	324830100	270250100	405530100	411699900	40.5	78.365		340.622	0.27905	0.190167	no	down
CAPZA1	F-actin-capping protein subunit alpha-1	15	8	0.523481	0.743237	1.13248	118670000	93111010	80381950	169710100	125160000	114920000	108410000	159000000	74.1	32.922		46.1471	0.164525	0.735544	no	down
CAPZA2	F-actin-capping protein subunit alpha-2	12	2	0.926264	0.971924	1.01139	35959000	40212980	43793990	41589970	33219020	54032020	35469000	43286980	63.3	32.949		43.1677	0.471511	0.260106	no	down
CAPZB	F-actin-capping protein subunit beta	14	14	0.642641	0.821094	0.956637	237290100	292460200	241430200	190539900	238830100	223750000	214460100	233300000	49.1	31.345		153.096	0.230791	0.35339	no	down
CARD11	Caspase recruitment domain-containing protein 11	10	10	0.0231118	0.142266	8.40913	4600302	559036	487330	3670402	18170000	6134796	7207602	28630010	10.2	133.28		75.4914	-0.494944	0.0788947	no	up
CARHSP1	Calcium-regulated heat stable protein 1	5	5	0.256208	0.508574	0.795482	219680100	211000000	206170000	148350000	161950000	191650000	97309000	187960100	64.6	15.892		133.842	-0.145216	0.647273	no	up
CARKD	ATP-dependent (S)-NAD(P)H-hydrate dehydratase	5	4	0.215485	0.458332	1.4035	4549803	2710201	1898600	2533100	5941500	4048600	2705801	3535402	23.6	36.576
CARM1	Histone-arginine methyltransferase CARM1	16	16	0.314863	0.563772	1.15539	97908020	79880970	66247970	69582970	97819010	109660000	86539970	69209010	38.7	65.853		208.514	0.0367592	0.907449	no	down
CARS	Cysteine--tRNA ligase, cytoplasmic	25	25	0.255226	0.506885	1.17815	147600000	144830000	107800000	97123020	174200000	150220100	121279900	135870100	34.4	85.472
CARS2	Probable cysteine--tRNA ligase, mitochondrial	12	12	0.376215	0.617598	1.18567	34523990	26298990	32156010	27431020	55784990	36932990	28811010	26664010	24.5	62.223		49.1403	0.014403	0.977355	no	down
CASC3	Protein CASC3	12	12	0.360619	0.609101	0.700777	4929401	6332397	15812000	11038000	4220498	3720799	9624094	8693606	27	76.277		120.374	-0.135523	0.660543	no	up
CASC4	Protein CASC4	14	14	0.39588	0.634989	0.910429	15470990	16196990	19429000	15236000	17972990	16178010	12000000	14606010	34.6	49.497		25.0087	0.228057	0.701817	no	down
CASC5	Protein CASC5	23	23	0.232083	0.477809	0.895047	10958000	12409010	8775397	10571000	9198997	10678010	9440495	8729897	13.2	265.39
CASK	Peripheral plasma membrane protein CASK	28	28	0.00584431	0.0667445	1.15921	127049900	118359900	130250100	132460000	151059900	138230000	144660000	155090000	38.1	105.12		80.8822	0.0439047	0.918292	no	down
CASKIN2	Caskin-2	15	14	0.0416514	0.188062	0.292147	11099000	10805000	13937000	12091000	936657	3352499	5885398	7965603	21.6	126.78		55.5873	-0.588063	0.0656685	no	up
CASP2	Caspase-2;Caspase-2 subunit p18;Caspase-2 subunit p13;Caspase-2 subunit p12	6	6	0.628249	0.810925	0.804376	1433427	1224200	1875600	5622101	1132523	1108862	1918001	3216099	18.6	50.685		22.3618	0.20687	0.744576	no	down
CASP3	Caspase-3;Caspase-3 subunit p17;Caspase-3 subunit p12	10	7	0.0506147	0.202772	0.682489	29806000	59797980	44023990	53476000	28138990	31258000	33158990	31213980	44.4	31.608		69.1157	-1.03145	1.10367e-05	yes	up
CASP6	Caspase-6;Caspase-6 subunit p18;Caspase-6 subunit p11	6	6	0.402906	0.640563	0.898461	15129000	16619000	16134010	13010000	12472000	17978000	10928010	14034990	18.4	33.31		25.5374	-0.237719	0.682947	no	up
CASP8	Caspase-8;Caspase-8 subunit p18;Caspase-8 subunit p10	5	5	0.189826	0.425952	0.643585	958568	1901800	2868002	2639301	793570	1409700	1232318	1717299	15.2	55.391		6.70247	-1.2405	0.158779	no	up
CASP8AP2	CASP8-associated protein 2	7	7	0.426681	0.663891	1.7911	1223147	1374099	4332002	1370701	539860	8615902	5872799	3759899	4.1	222.66		112.071	-0.224808	0.534665	no	up
CASP9	Caspase-9;Caspase-9 subunit p35;Caspase-9 subunit p10	2	2	0.135676	0.350213	1.93609	2045700	873485	2540700	712612	3106902	1495001	2302500	4250501	10.3	46.28		17.4327	0.745239	0.184572	no	down
CAST	Calpastatin	8	8	0.867508	0.943998	0.850448	4255201	3867799	321154	3650300	7131301	3788700	312180	1196608	19.1	76.572		18.864	0.836847	0.157732	no	down
CASZ1	Zinc finger protein castor homolog 1	1	1	0.465786	0.697169	1.20969	935030	633400	747500	1251700	814660	1595112	696850	1310405	1	190.07		17.9255	-0.727042	0.203905	no	up
CAT	Catalase	15	14	0.0187843	0.127358	0.598914	30938020	24769010	25672020	21551010	21783000	16902000	12698010	11667990	36.4	59.755		4.53567	-1.58563	0.134488	no	up
CAV1	Caveolin-1	8	8	0.16853	0.398859	0.311589	25590990	70613960	51579980	44644990	1678516	25695000	24919010	36497010	46.6	20.471		14.5328	-1.52664	0.00492696	yes	up
CBFA2T2	Protein CBFA2T2	7	3	0.434109	0.670668	0.56025	2974102	2034200	3035700	478715	352094	2267101	2612600	415346	13.1	67.132		20.9624	-0.38682	0.515268	no	up
CBL	E3 ubiquitin-protein ligase CBL	25	24	0.00196682	0.0471881	0.677774	88286000	116410000	106300000	103940000	63746980	66153000	72176040	78729030	41.6	99.632		67.2509	0.00678281	0.989438	no	down
CBLL1	E3 ubiquitin-protein ligase Hakai	6	6	0.0147045	0.113479	2.28279	7653900	10221000	8355801	4567401	27682980	12356000	15331010	15460990	20.2	54.519		28.4028	0.240526	0.651336	no	down
CBR1	Carbonyl reductase [NADPH] 1	13	8	0.105741	0.301687	1.63507	55395030	29926990	20276000	30751980	68430010	61248040	33875990	52036010	61	30.375		30.8763	0.898382	0.0164565	no	down
CBR3	Carbonyl reductase [NADPH] 3	7	5	0.14923	0.369085	3.28876	44747990	14667000	1598029	13906990	39113020	49265980	21491990	41202000	39.4	30.85
CBR4	Carbonyl reductase family member 4	5	5	0.00512808	0.0639574	1.96439	3754901	3971302	4154101	3653800	10321000	9369299	6553600	5318101	25.3	25.301		21.0572	-0.268831	0.676983	no	up
CBS	Cystathionine beta-synthase	21	15	0.439708	0.674923	1.07332	371350000	303849900	289299800	290959900	369240100	349470200	279310200	349730000	49	60.586		5.31287	1.19282	0.240202	no	down
CBWD1	COBW domain-containing protein 1;COBW domain-containing protein 2;COBW domain-containing protein 5;COBW domain-containing protein 3;COBW domain-containing protein 6	9	9	0.397129	0.636299	0.80218	11456000	11719000	6982497	13805000	4995902	10038990	8755604	12203010	26.8	44.068
CBX1	Chromobox protein homolog 1	10	9	0.105189	0.301388	0.304627	50140980	76166010	57083000	5558100	12673000	6698699	9091705	13518990	58.9	21.418		80.3749	0.280259	0.359393	no	down
CBX2	Chromobox protein homolog 2	16	16	0.00377092	0.0584586	1.29261	47342970	47211020	53836000	49699000	58832970	64389020	72717970	60605020	39.5	56.08		155.081	0.384931	0.0921451	no	down
CBX3	Chromobox protein homolog 3	11	10	0.114788	0.317611	0.853339	452509900	563770200	503049800	412850000	368350200	378550000	443500200	454299800	59.6	20.811		106.176	-0.52699	0.0653638	no	up
CBX5	Chromobox protein homolog 5	13	13	0.00496793	0.0623763	1.24879	181080100	183119900	207489900	170069900	236050100	248909900	218130000	222039900	65.4	22.225		45.5824	0.0489736	0.943612	no	down
CBY1	Protein chibby homolog 1	1	1	0.510192	0.735206	1.21245	535980	433008	877373	333190	846920	631100	745774	367820	9.5	14.47		5.91858	0.0122723	0.994754	no	down
CC2D1A	Coiled-coil and C2 domain-containing protein 1A	26	26	0.00024771	0.0280769	0.684086	49833020	43580980	44630000	42113010	29890020	31737000	28473020	33096010	33	104.06		34.663	0.152231	0.783433	no	down
CC2D1B	Coiled-coil and C2 domain-containing protein 1B	6	5	0.972942	0.989081	1.00738	2360601	2973001	3903399	4428400	2689200	2464801	4155502	4535701	10.5	94.223		21.3306	-0.196745	0.782636	no	up
CCAR1	Cell division cycle and apoptosis regulator protein 1	39	39	0.328187	0.575963	1.09043	273580000	307549900	332649900	268480200	328280100	287920100	380920100	295080200	31.2	132.82		154.4	-0.572716	0.0033699	no	up
CCAR2	Cell cycle and apoptosis regulator protein 2	49	49	0.769343	0.891393	0.980606	1111300000	1011500000	1010000000	871860500	1032299000	925049900	1060300000	903949600	63.4	102.9		189.718	-0.152753	0.538825	no	up
CCBL1	Kynurenine--oxoglutarate transaminase 1	8	8	0.0291702	0.158553	1.39292	6782699	4786199	4772897	6088997	8764799	8530701	7555803	6286602	22.7	47.875
CCBL2	Kynurenine--oxoglutarate transaminase 3	14	12	0.182863	0.41775	1.17963	61987960	56832990	59240000	59351010	84626940	78508990	51727010	69789980	31.3	51.4
CCDC101	SAGA-associated factor 29 homolog	5	5	0.604154	0.798716	0.929754	4111402	3631402	4296002	5738203	4664299	3234302	3823602	4768003	24.2	33.238
CCDC109B	Calcium uniporter regulatory subunit MCUb, mitochondrial	4	2	0.526398	0.745483	0.922126	2352601	2526401	2444199	1580899	2135999	2239699	1946201	1783499	15.8	39.082
CCDC115	Coiled-coil domain-containing protein 115	4	4	0.97746	0.990881	1.00392	7775299	10309000	6986504	7497799	9613806	8864296	8286702	6039498	24.4	19.76		8.37418	-0.111766	0.919925	no	up
CCDC117	Coiled-coil domain-containing protein 117	6	6	0.0282338	0.156571	0.795364	5869197	6125403	5549003	7073796	4210299	5269801	4641901	5483304	28.3	30.541		22.5483	-0.264658	0.655227	no	up
CCDC12	Coiled-coil domain-containing protein 12	9	9	0.642203	0.820893	0.964319	49562970	55143020	57301970	57191020	53823970	43704000	55443980	59384990	54.2	19.181		12.6872	0.189958	0.847585	no	down
CCDC120	Coiled-coil domain-containing protein 120	2	2	0.904302	0.960454	0.944777	754030	656080	693730	1323391	2698795	409057	577410	567680	5.7	67.567		13.4095	-0.868666	0.158275	no	up
CCDC124	Coiled-coil domain-containing protein 124	16	16	0.0106482	0.0926374	0.896271	122920000	123200000	132910000	124030000	107980100	108400000	116959900	117670000	57.4	25.835		66.6025	-0.273222	0.450052	no	up
CCDC127	Coiled-coil domain-containing protein 127	4	4	0.105123	0.301379	0.394573	2195773	7533599	1816301	808680	711584	907789	1350801	674937	15.4	30.834		16.4655	-0.0799931	0.922549	no	up
CCDC130	Coiled-coil domain-containing protein 130	5	5	0.802432	0.911117	0.854438	304824	2030801	2329801	2980999	658338	879640	1615499	2449400	19.2	44.802		16.2737	-0.0461064	0.959048	no	up
CCDC132	Coiled-coil domain-containing protein 132	13	13	0.0522846	0.206702	0.868877	10038000	12112000	9243104	10176000	9079201	9176101	8658895	9034897	18.5	111.17
CCDC134	Coiled-coil domain-containing protein 134	8	8	0.189877	0.425762	6.83605	37558000	26708000	289142	696250	50550990	40672000	23290990	9209304	42.8	26.56		5.67698	-0.648312	0.566605	no	up
CCDC137	Coiled-coil domain-containing protein 137	14	14	0.905837	0.961441	0.983681	43055020	31121020	54520030	40141010	38069010	37398990	49686970	38811990	44.6	33.231		38.512	-0.572442	0.105817	no	up
CCDC14	Coiled-coil domain-containing protein 14	8	8	0.046197	0.196336	0.590338	1780900	2949800	3253201	2650900	1384208	1719301	1033803	2236400	11.8	106.3		85.9648	0.102269	0.799011	no	down
CCDC141	Coiled-coil domain-containing protein 141	5	5	0.813609	0.918252	0.894073	2770700	2558301	1450400	1166968	1391505	1679895	4790402	684606	5.4	166.26		10.8418	-1.01438	0.149992	no	up
CCDC167	Coiled-coil domain-containing protein 167	2	2	0.231539	0.477726	1.98937	1837330	1240983	635990	426260	1047077	5573199	1007380	1646900	23.7	11.459		7.27362	0.249758	0.828246	no	down
CCDC186	Coiled-coil domain-containing protein 186	15	15	0.000176726	0.0228293	0.226322	11805000	15430000	10511010	16389000	2030100	4115198	3232601	3048401	19	103.69		24.6959	0.108763	0.881074	no	down
CCDC22	Coiled-coil domain-containing protein 22	10	8	0.981547	0.993201	0.984701	1375101	916210	3723702	6571603	3566900	4254999	603299	3165701	20.7	70.755		15.9628	-0.165306	0.836501	no	up
CCDC25	Coiled-coil domain-containing protein 25	4	4	0.334754	0.583975	1.40094	12134010	14587000	6000103	7695704	20905990	13780000	6612896	16525010	22.6	24.479		10.1958	0.470499	0.610156	no	down
CCDC43	Coiled-coil domain-containing protein 43	4	4	0.51492	0.737997	0.742672	230859900	271960100	251509900	69069980	68830960	255020000	110080000	171719900	26.3	25.248		15.6647	-0.132255	0.872778	no	up
CCDC47	Coiled-coil domain-containing protein 47	20	20	0.951011	0.982849	0.996013	210080100	253180000	235159900	219830000	243040100	210170100	251630000	210530000	42.7	55.873		69.1179	-0.671014	0.0337323	no	up
CCDC50	Coiled-coil domain-containing protein 50	8	8	0.570268	0.776799	0.894326	11987000	9461900	9128596	8787703	10900990	7577100	12238000	5757999	27.5	35.822		19.7304	-0.149214	0.843352	no	up
CCDC51	Coiled-coil domain-containing protein 51	9	5	0.363129	0.610894	0.635707	3262099	18606010	18000000	13559000	5109099	5428901	12539010	6955998	25.3	45.811		35.959	-0.771154	0.0261125	no	up
CCDC53	WASH complex subunit CCDC53	5	5	0.597033	0.794675	1.2667	947524	5759103	4480299	4406802	3586400	4108799	3518099	5350499	38.7	21.172
CCDC58	Coiled-coil domain-containing protein 58	3	3	0.659209	0.831964	0.894197	44110970	61152960	48181010	34527000	70235020	44894000	35008020	25990980	27.1	16.62		14.8395	-0.26883	0.770362	no	up
CCDC59	Thyroid transcription factor 1-associated protein 26	7	7	0.67445	0.838456	0.929291	17879000	15811000	19195990	19476010	14712000	11784000	18286010	24861980	27.8	28.669		32.855	0.21303	0.726344	no	down
CCDC6	Coiled-coil domain-containing protein 6	22	22	0.095961	0.28819	0.806377	105400100	99505940	107240000	122850000	71862980	88913960	79944040	114369900	49.2	53.29		55.7383	-0.480201	0.134647	no	up
CCDC61	Coiled-coil domain-containing protein 61	6	6	0.312404	0.561638	0.647743	3447200	5699402	4402900	2787200	3654998	865134	3369598	3983502	12.7	57.368		10.6051	0.620186	0.437687	no	down
CCDC71	Coiled-coil domain-containing protein 71	6	6	0.0949675	0.286445	1.36974	5217903	3843901	5357904	4559600	8608103	6016602	7376596	4514702	16.7	49.648		66.8172	0.0535954	0.912048	no	down
CCDC71L	Coiled-coil domain-containing protein 71L	4	4	0.00693903	0.0748818	1.89076	4677799	4151900	5289702	7293798	11912000	9212897	11385010	7664897	17.9	26.261		23.4461	0.491481	0.393271	no	down
CCDC74A	Coiled-coil domain-containing protein 74A;Coiled-coil domain-containing protein 74B	3	3	0.157754	0.381759	0.173225	5468904	448892	966587	52963000	730774	287701	612522	878732	9	41.605
CCDC77	Coiled-coil domain-containing protein 77	5	5	0.0172453	0.121102	1.49826	3161602	4352697	3779400	3972599	4744298	7674804	5330800	5363900	11.5	57.485		15.7864	0.179244	0.82171	no	down
CCDC8	Coiled-coil domain-containing protein 8	12	12	0.670007	0.835279	0.918664	7417503	16040000	13417990	14769000	12434000	10170000	13339000	9955700	35.9	59.374		35.4359	-0.0646084	0.909519	no	up
CCDC82	Coiled-coil domain-containing protein 82	3	3	0.722198	0.868942	0.694147	1906548	9969596	425345	7640696	3395324	590283	746168	9590194	5.7	64.001		17.8756	-0.777471	0.175049	no	up
CCDC84	Coiled-coil domain-containing protein 84	4	4	0.681114	0.84213	1.05964	3285901	2967700	2802301	2499259	3807002	3098898	2164601	3371799	14.8	37.974		9.60125	-0.0827104	0.93796	no	up
CCDC85C	Coiled-coil domain-containing protein 85C	7	7	0.374673	0.616967	1.13246	4443601	5760603	6574896	5612299	6351598	7320597	4703901	7102800	20	45.209		33.5208	0.103034	0.87127	no	down
CCDC86	Coiled-coil domain-containing protein 86	12	12	0.554429	0.766042	0.926287	86500960	107160000	136769900	100490100	83973960	92945950	120740000	99523040	35.3	40.235		78.6843	-0.250912	0.520754	no	up
CCDC88A	Girdin	32	32	0.00176118	0.0468817	2.83668	6602099	15113000	10792000	13699000	29432010	30623010	28256010	37505000	19.9	216.04		158.776	-0.0243751	0.958366	no	up
CCDC88C	Protein Daple	31	26	0.137224	0.351246	1.19671	13223000	12450010	11384000	8269705	13455000	13511010	13075010	13372990	17.8	228.23		122.828	0.19565	0.482238	no	down
CCDC9	Coiled-coil domain-containing protein 9	15	15	0.40889	0.647894	0.891858	43300030	56232980	54181020	46833980	61235970	37681990	38027000	44549000	31.3	59.702		21.7285	0.387097	0.49538	no	down
CCDC90B	Coiled-coil domain-containing protein 90B, mitochondrial	6	6	0.306448	0.553917	0.745152	1254254	2245300	2266100	3314602	1138236	2439402	1305799	1798699	31.9	29.505		16.0883	0.393089	0.557239	no	down
CCDC91	Coiled-coil domain-containing protein 91	3	3	0.366811	0.613062	1.71824	949310	2029000	605873	847880	1562871	875628	888116	7096305	6.8	49.971		10.2836	-0.430261	0.629607	no	up
CCDC93	Coiled-coil domain-containing protein 93	7	4	0.987038	0.995753	0.991073	1089225	1687001	351739	2800301	926188	1966832	1718401	557815	12.2	73.197		6.57488	-0.6005	0.572861	no	up
CCDC94	Coiled-coil domain-containing protein 94	11	11	0.265266	0.518497	0.759111	15788000	21482990	20403000	25055020	10196000	15580990	13528000	26790010	38.7	37.085
CCDC97	Coiled-coil domain-containing protein 97	7	7	0.336822	0.585093	0.823059	8208402	5022199	6501501	5186500	6519999	3367002	4838400	6005801	37.9	38.946		27.2611	0.33549	0.528763	no	down
CCM2	Cerebral cavernous malformations 2 protein;Cerebral cavernous malformations protein 2 homolog	2	2	0.862111	0.940956	1.06486	2064599	1041201	976469	583134	704376	1722299	809685	1602303	6.8	48.836		29.0688	0.0351658	0.956789	no	down
CCNA2	Cyclin-A2	10	10	0.486063	0.712576	1.28386	4704001	3723599	3023500	3674301	2373799	4468202	4361903	11427000	29.4	48.55		161.794	-0.342334	0.126675	no	up
CCNB1	G2/mitotic-specific cyclin-B1	14	14	0.895112	0.955675	1.01557	80352950	116110000	118970000	110119900	96013960	94902000	122799900	116199900	37.2	48.337		246.912	-0.122101	0.657395	no	up
CCNB2	G2/mitotic-specific cyclin-B2	6	6	0.750438	0.882418	0.879291	1934301	6742101	7579504	6508398	2397901	4575197	6370697	5502199	18.3	45.281		96.2927	0.15997	0.636172	no	down
CCNC	Cyclin-C	2	2	0.0897306	0.277046	1.58003	932955	2096301	1825700	2095999	3451176	2867600	2023000	2329801	7.4	33.242		40.6541	-0.382042	0.322873	no	up
CCNDBP1	Cyclin-D1-binding protein 1	2	2	0.211131	0.452934	0.695156	1656401	2575500	1209299	3547402	1168776	1236747	1646599	1795563	9.4	40.262		17.907	0.399774	0.545803	no	down
CCNH	Cyclin-H	11	11	0.0296409	0.159482	0.777682	12254000	16249990	15046990	17375010	10661990	12074000	13180010	11222990	32.2	37.643		18.2762	-0.28609	0.658802	no	up
CCNK	Cyclin-K	11	11	0.19377	0.431466	1.25354	24667020	35950020	45690980	40817980	41899980	37779010	53597030	48133000	23.4	64.239		61.7206	-0.39865	0.176546	no	up
CCNL1	Cyclin-L1	2	2	0.739414	0.878495	1.18674	728966	4132503	4243303	3138700	3090200	1566017	5516402	2980999	4.8	59.633		70.307	-0.256767	0.431796	no	up
CCNL2	Cyclin-L2	9	9	0.151103	0.371833	0.901478	24868000	24314000	19246990	21473990	19131000	19903000	20565000	21077000	27.3	58.147		97.0609	-0.497389	0.0463683	no	up
CCNT1	Cyclin-T1	14	9	0.000879311	0.0407805	0.457149	13877990	13612000	17316010	16774000	5196198	6769396	8717995	7814697	22.7	80.684		57.3587	-0.230837	0.545199	no	up
CCNT2	Cyclin-T2	6	5	0.0406864	0.186233	1.45445	3438701	2628801	2048000	2979801	4724899	3111300	3785901	4435700	9.7	81.028		58.9657	-0.0989993	0.833703	no	up
CCNY	Cyclin-Y	5	5	0.0193932	0.129449	3.82998	1417155	4448803	1101884	617731	5014702	5631102	7026604	4653698	21.4	39.336		41.9978	-0.0626478	0.905834	no	up
CCNYL1	Cyclin-Y-like protein 1	5	5	0.361927	0.610149	1.13775	6179796	8402805	7620600	6952302	6154903	10438990	7860102	9128403	17.5	40.705		14.6116	0.131015	0.881246	no	down
CCPG1	Cell cycle progression protein 1	4	4	0.718287	0.866075	0.846686	445416	2064900	1714699	968530	1286200	1315699	1110300	417782	5.5	87.339		20.2752	-0.236783	0.711861	no	up
CCRN4L	Nocturnin	9	9	0.283932	0.536533	0.38214	18599000	24354990	31015010	22623010	801458	20561000	17731010	23197020	29.5	48.195
CCS	Copper chaperone for superoxide dismutase	6	6	0.843552	0.93176	0.95759	23721990	24957980	13862000	30852000	16184000	29033020	22988010	19711010	26.3	29.04		13.4719	0.425676	0.553875	no	down
CCT2	T-complex protein 1 subunit beta	39	13	0.341505	0.589165	0.847293	583750000	589669800	692990100	795549800	378429900	574530000	600390300	749260500	78.7	57.488		329.701	-0.0564685	0.850703	no	up
CCT3	T-complex protein 1 subunit gamma	40	10	0.900482	0.958129	1.03761	127390000	265759900	300020200	332350000	185390000	194810000	265909900	407449800	62.4	60.533		522.638	-0.242426	0.186131	no	up
CCT4	T-complex protein 1 subunit delta	33	8	0.751581	0.882989	0.877023	242989900	78291950	197540000	186999900	62168020	192100000	135420000	257080200	66.2	57.924		381.208	-0.0471926	0.851015	no	up
CCT5	T-complex protein 1 subunit epsilon	42	20	0.517561	0.740239	0.940987	1127101000	1390501000	1150801000	1373500000	1008299000	1324401000	1099000000	1323399000	81	59.67		654.59	-0.138349	0.492236	no	up
CCT6A	T-complex protein 1 subunit zeta	26	7	0.949737	0.982269	1.00927	531519700	636669600	742070000	794260400	843760300	515490300	627989800	757669800	54.4	58.024		342.719	-0.134674	0.612195	no	up
CCT6B	T-complex protein 1 subunit zeta-2	6	1	0.676433	0.839114	0.470155	187750000	523553	147869900	130550000	24268010	9499000	1970929	204069900	11.3	57.821
CCT7	T-complex protein 1 subunit eta	36	36	0.638732	0.818508	0.973257	1744800000	1961700000	1957700000	1931099000	1639500000	1802801000	1921099000	2044699000	72	59.366		499.424	0.0699374	0.751956	no	down
CCT8	T-complex protein 1 subunit theta	44	12	0.858528	0.938282	0.970834	272950000	495329700	414549800	423280200	302270000	371770000	389999900	480870100	76.3	59.62		309.266	-0.0624503	0.865067	no	up
CCZ1B	Vacuolar fusion protein CCZ1 homolog B;Vacuolar fusion protein CCZ1 homolog	15	15	0.629329	0.811518	1.06985	26650020	22146010	21683010	21936000	25891010	33494020	18553000	22858000	32	55.866
CD109	CD109 antigen	8	8	0.621685	0.806725	0.837367	1087900	1693499	2419718	1292399	1970640	2013799	1242500	574484	7	161.69		6.95409	0.90771	0.292709	no	down
CD151	CD151 antigen	2	2	0.170659	0.401956	0.502354	3518001	7874205	11378000	8407705	1281356	4176001	4444300	7096605	7.1	28.295		39.7959	0.533107	0.167753	no	down
CD200	OX-2 membrane glycoprotein	2	2	0.0457545	0.196229	0.566974	15149990	24129010	21976000	19807010	6422299	11806000	13045000	16624010	11.2	31.264		35.4957	-0.57618	0.11557	no	up
CD276	CD276 antigen	7	7	0.113381	0.314791	1.30208	10665000	8843904	8714895	8830597	14978990	14326000	11691000	8316698	28.3	57.235		104.737	0.877424	0.000714653	no	down
CD2AP	CD2-associated protein	30	22	0.0388016	0.181203	0.777277	86296950	80893040	86885950	99636000	57647020	66743000	66188960	86618030	52.4	71.45		63.4353	-0.606805	0.0504814	no	up
CD2BP2	CD2 antigen cytoplasmic tail-binding protein 2	10	10	0.997259	0.998992	0.999472	17515000	21850990	26496000	25503010	17855000	20405000	23276000	30431980	36.4	37.646		48.5943	0.100294	0.834014	no	down
CD3EAP	DNA-directed RNA polymerase I subunit RPA34	19	19	0.201971	0.439764	1.1458	114120000	121810000	149709900	108570000	140510000	120000000	163820000	140990100	52.4	54.985		55.3616	-0.479477	0.110947	no	up
CD44	CD44 antigen	3	3	0.544179	0.759192	0.734796	827238	2401400	6755002	3296401	1158501	2138599	1738399	2994001	5.5	81.537		3.52608	-0.0968816	0.959132	no	up
CD63	CD63 antigen	3	3	0.257284	0.509883	0.66534	63188990	36460020	94687940	93261060	39348020	25585990	49906990	79349000	8.4	25.636		149.32	0.196323	0.463874	no	down
CD74	HLA class II histocompatibility antigen gamma chain	3	3	0.0559945	0.213447	0.607516	6970497	9782302	8229504	4098101	3559701	5030599	3575800	4891999	12.5	33.515		12.9795	-0.147604	0.874357	no	up
CD81	CD81 antigen	2	2	0.416246	0.654057	0.362625	11871000	43200020	47703990	36490020	392418	35924980	29768000	36781980	15.3	25.809		155.907	-0.0859467	0.807224	no	up
CD82	CD82 antigen	3	3	0.063388	0.226898	0.305387	5181599	3730300	2685100	1044630	1110524	1251299	1317626	257542	9	29.625
CD9	CD9 antigen	5	5	0.247034	0.496443	1.12543	216830100	275520100	232169900	190889900	279439800	276430100	243460100	225860100	14.5	25.416		118.751	-0.242996	0.35748	no	up
CD99	CD99 antigen	2	2	0.0960738	0.288325	3.91284	3537599	2939219	203899	2935200	7951304	5533099	6702402	4946799	13	18.848
CDC123	Cell division cycle protein 123 homolog	5	5	0.817296	0.919633	0.961517	26650020	29386010	26151980	38668990	22633010	27104020	26078000	42313980	17	39.134		81.2748	-0.0668403	0.881769	no	up
CDC16	Cell division cycle protein 16 homolog	15	15	0.0726006	0.246242	0.63963	22775010	35312020	29279990	32840990	11638000	20788000	19178000	27898990	24	71.655		101.724	-0.359218	0.214603	no	up
CDC20	Cell division cycle protein 20 homolog	12	12	0.185212	0.419702	0.7213	24322010	31988020	28596000	31139010	18684990	12034000	28988980	28768990	37.5	54.722		215.234	-0.30695	0.154871	no	up
CDC23	Cell division cycle protein 23 homolog	18	18	0.251139	0.500965	0.828488	47231000	51555980	71423960	73322970	38843000	46742990	54605010	60599970	32.2	68.833		40.1445	0.443449	0.237615	no	down
CDC25C	M-phase inducer phosphatase 3	7	7	0.282537	0.535576	1.20507	3595102	5066802	4692801	6720200	4856498	5583797	5925403	7539398	18.4	53.364		15.2081	0.475704	0.472567	no	down
CDC26	Anaphase-promoting complex subunit CDC26	2	2	0.161849	0.387611	0.577635	1538099	1929800	2460299	2537699	1855700	1527600	1590099	457718	14.1	9.7769		14.1883	-0.0126649	0.989631	no	up
CDC27	Cell division cycle protein 27 homolog	19	3	0.178795	0.412665	1.35758	9945202	11266000	10006000	6066803	13922000	14394010	14496010	7952997	33.7	91.866		47.4434	0.153229	0.739618	no	down
CDC34	Ubiquitin-conjugating enzyme E2 R1	7	7	0.279589	0.53277	0.906972	29552020	27458990	26888020	31106010	22267990	27696010	23916000	31136000	22.1	26.621		81.0931	-0.119636	0.748101	no	up
CDC37	Hsp90 co-chaperone Cdc37;Hsp90 co-chaperone Cdc37, N-terminally processed	19	19	0.823203	0.922419	0.987871	338080200	350619800	324999800	346959800	387330000	319969900	331570200	309780000	39.7	44.468		151.658	0.147255	0.585694	no	down
CDC37L1	Hsp90 co-chaperone Cdc37-like 1	5	5	0.563177	0.772496	1.19563	2735001	1566199	899032	1071187	2271400	1533999	2109900	1146700	17.8	38.834		20.4093	-0.634837	0.21124	no	up
CDC40	Pre-mRNA-processing factor 17	19	19	0.303654	0.551391	0.957171	42533000	43980010	45580990	42416980	39683000	38917990	44197020	44474970	39.9	65.521		24.6958	-0.0646628	0.926655	no	up
CDC42	Cell division control protein 42 homolog	6	6	0.511182	0.73627	0.849934	201039900	203410000	246740000	422319900	236759900	169770000	170540000	324400100	31.4	21.258		94.0082	-0.206254	0.498837	no	up
CDC42BPA	Serine/threonine-protein kinase MRCK alpha	19	16	0.667547	0.834475	1.21429	7507499	9135997	4777297	1848599	2978300	7941996	6533598	8521402	13	197.3		56.177	-0.255511	0.539603	no	up
CDC42BPB	Serine/threonine-protein kinase MRCK beta	37	17	0.00311589	0.0577895	1.4262	25697990	22348010	20569000	23204990	38100980	33041010	28886990	31186010	24.1	194.31		258.042	-0.322995	0.0686382	no	up
CDC42BPG	Serine/threonine-protein kinase MRCK gamma	14	9	0.00407332	0.0577804	0.478047	4905898	3609098	3943302	3755701	1390999	1620299	2314099	2625699	11.3	172.46		34.8731	-0.699642	0.115574	no	up
CDC42EP1	Cdc42 effector protein 1	2	2	0.909759	0.963281	0.980472	1620700	2300501	1418678	1054199	1542002	1376399	1666100	1457275	8.2	40.294		11.4069	0.396501	0.64064	no	down
CDC42EP2	Cdc42 effector protein 2	2	2	0.515882	0.738834	0.850591	852237	1241700	806849	853410	1414785	727200	512618	723221	17.1	22.483		6.69176	0.029473	0.980037	no	down
CDC42EP3	Cdc42 effector protein 3	1	1	0.153022	0.37437	1.75005	392182	409000	798670	711192	1797014	875720	457120	1188016	6.3	27.678		16.1342	0.662353	0.252636	no	down
CDC42EP4	Cdc42 effector protein 4	7	7	0.2907	0.541233	1.49275	2764199	2380600	4619103	5735503	2819201	10863000	5566101	5078203	36.5	37.979		21.2774	0.523518	0.313457	no	down
CDC42SE2	CDC42 small effector protein 2	1	1	0.298276	0.546962	1.39618	1941095	4291302	5300202	6515699	4564003	5280200	5522700	8213200	22.6	9.2234
CDC45	Cell division control protein 45 homolog	10	10	0.158786	0.383673	0.841612	15668990	12250000	11576000	13202000	8597003	11360000	12202010	12350000	19.3	65.568		29.5164	0.071121	0.912379	no	down
CDC5L	Cell division cycle 5-like protein	45	45	0.414059	0.6527	1.08324	530170100	544220200	603880300	441350000	589020000	538599900	670049600	498110100	59.5	92.25		86.4487	-0.267612	0.487438	no	up
CDC6	Cell division control protein 6 homolog	11	11	0.179364	0.412967	1.24707	20212010	17187010	23006010	21672010	23248010	18597990	34227990	28306000	22	62.72		95.6532	-0.0162797	0.969189	no	up
CDC7	Cell division cycle 7-related protein kinase	11	11	0.84978	0.933786	0.972475	24888000	34594990	38658000	39786020	26792990	34927990	41148000	30756980	22.8	63.887		55.9951	0.28415	0.486593	no	down
CDC73	Parafibromin	26	26	0.371552	0.615118	0.954446	153399900	172429900	190779900	163830000	159110000	158099900	168740000	161630000	48.2	60.576		37.6377	-0.419663	0.306482	no	up
CDCA2	Cell division cycle-associated protein 2	23	23	0.652386	0.827301	1.07589	35578000	46197010	58910020	48722020	42526980	43210020	69511980	49484010	32.6	112.68		101.153	-0.304761	0.262557	no	up
CDCA3	Cell division cycle-associated protein 3	5	5	0.899753	0.95826	0.916561	1468901	11231000	4977797	1632700	808514	4383501	4781297	5583997	25.7	28.998		31.1859	0.19579	0.730653	no	down
CDCA5	Sororin	7	7	0.674605	0.838297	1.09534	22115990	20148990	29961980	18456000	14451990	26573990	30624990	30157990	36.5	27.6		49.7833	-0.132459	0.794289	no	up
CDCA7	Cell division cycle-associated protein 7	5	5	0.882196	0.949967	0.953268	3928399	4175901	9643403	5685299	3490501	5098398	10052000	4151801	16.7	42.573		82.7304	-0.0831351	0.836501	no	up
CDCA7L	Cell division cycle-associated 7-like protein	11	11	0.759313	0.88545	0.960959	49908970	70773970	84205980	72040000	60767000	65448970	76735050	59872020	23.6	52.206		126.242	-0.259302	0.313693	no	up
CDCA8	Borealin	13	13	0.0049132	0.061876	1.48095	52085980	55039010	70888960	56044020	82094000	81298950	102830000	79825970	51.8	31.323		24.481	-0.305891	0.5825	no	up
CDCP1	CUB domain-containing protein 1	8	8	0.285539	0.536944	1.24795	2734499	5100899	6102399	5672603	5324799	5504702	6403503	6239298	13.2	92.931		19.4529	0.224699	0.744323	no	down
CDH1	Cadherin-1;E-Cad/CTF1;E-Cad/CTF2;E-Cad/CTF3	20	17	0.000300552	0.0279344	1.35345	165450100	156990000	155569900	148860100	220359900	228860000	198910100	201210100	30	97.455		250.767	0.294449	0.138608	no	down
CDH2	Cadherin-2	17	16	0.0167742	0.119374	1.3824	38036000	48120020	55032020	37873980	55225970	62665040	61783010	65158970	30.7	99.808		68.4747	1.07059	3.21848e-06	yes	down
CDH3	Cadherin-3	25	22	0.314666	0.563473	0.912744	90609980	100740000	106200000	75020020	89787990	81171040	88186960	78532980	37.2	91.417		206.386	-0.18886	0.461809	no	up
CDH4	Cadherin-4	3	2	0.339319	0.586924	0.507589	409487	2953999	2873801	3486502	1011826	492025	546258	2958400	3.6	100.03		7.03821	-1.13155	0.241227	no	up
CDIPT	CDP-diacylglycerol--inositol 3-phosphatidyltransferase	3	3	0.437594	0.67274	1.18219	17125990	27817990	29063010	21543000	31785000	29652010	35614000	17357010	15	23.599		34.5029	-0.507824	0.223167	no	up
CDK1	Cyclin-dependent kinase 1	21	19	0.224322	0.468211	1.1323	298570000	340190200	226710100	272529900	330110100	318560100	289970000	338289900	71	34.095		104.012	0.367538	0.151189	no	down
CDK10	Cyclin-dependent kinase 10	2	2	0.280707	0.533628	1.26409	1198999	818080	1173300	586522	1527099	997040	986640	1147299	6.1	40.96		21.2765	-0.241065	0.708918	no	up
CDK11B	Cyclin-dependent kinase 11B	26	4	0.960641	0.985791	0.989576	18642990	18744000	22276000	27788000	27492010	16771010	30614990	14695010	32.7	92.619		30.7661	-0.19429	0.729611	no	up
CDK12	P	23	18	0.698899	0.855501	1.02658	39562990	45385980	44521980	41490020	40893010	42983990	51642000	40583000	20.7	164.15		186.996	-0.436008	0.0338435	no	up
CDK13	Cyclin-dependent kinase 13	23	19	0.0725874	0.246335	1.23558	11888000	13514010	16251990	14300000	16347990	14300000	19330000	19256990	22.4	164.92		112.712	-0.19324	0.517006	no	up
CDK14	Cyclin-dependent kinase 14	5	4	0.757978	0.884927	0.824403	1153500	1512600	454511	1487100	742558	214225	1339701	2556100	10.7	53.056		31.6967	-0.106306	0.860182	no	up
CDK16	Cyclin-dependent kinase 16	11	8	0.37388	0.616562	1.14941	7035900	4879203	5205398	7004502	5821000	8408694	5537497	8060501	29.6	55.715		172.644	0.0272901	0.943726	no	down
CDK17	Cyclin-dependent kinase 17	10	4	0.0758415	0.25196	1.40842	5593003	7516298	6323697	4863701	8073801	10742010	5965199	9833898	21.8	59.582		14.8503	0.137479	0.872778	no	down
CDK18	Cyclin-dependent kinase 18	12	8	0.786158	0.901562	0.942686	7627504	5187103	5386498	5552504	8499900	3575299	6494199	4734999	31.4	54.424		25.7139	0.959409	0.0141342	no	down
CDK2	Cyclin-dependent kinase 2	12	9	0.318637	0.568909	0.917073	34702000	40824020	36481000	44726990	35119000	33435000	33107000	42058980	53.7	33.929		25.072	0.394371	0.455787	no	down
CDK21	Cyclin-dependent kinase 2-associated protein 1	2	2	0.0751137	0.250925	1.62352	3035299	3900799	3682198	5990900	7185196	4340199	5862497	9925604	34.2	12.354
CDK4	Cyclin-dependent kinase 4	5	4	0.45275	0.686276	0.609249	6232703	9414197	10977990	12380000	1008790	6863097	11603000	13676990	22.8	33.729		164.31	-0.0727204	0.811716	no	up
CDK5	Cyclin-dependent-like kinase 5	11	10	0.349342	0.597721	0.927942	31392020	31863000	28315990	27045990	22980990	30259990	27721990	29461980	38.4	33.304		10.1858	-0.0354183	0.973473	no	up
CDK5RAP1	CDK5 regulatory subunit-associated protein 1	8	5	0.0759442	0.251937	0.714351	11156000	10053010	15375000	13605000	6166298	10045000	10757000	9168498	12.6	67.688		49.3799	-0.146536	0.748101	no	up
CDK5RAP2	CDK5 regulatory subunit-associated protein 2	20	20	0.883113	0.950326	0.957464	5691097	8205505	9517302	9166001	3658102	7884695	10482000	11324000	14.7	215.04		98.2369	0.0527985	0.901062	no	down
CDK5RAP3	CDK5 regulatory subunit-associated protein 3	13	13	0.159158	0.384182	1.20923	35296010	38872020	42009020	59124980	55333990	46649030	53155980	53103020	22.5	56.92		40.1184	0.549132	0.175537	no	down
CDK6	Cyclin-dependent kinase 6	4	3	0.00347771	0.0578983	3.06359	1336400	981311	765130	586260	3324701	1777201	2402499	3650401	16.9	36.938		8.05703	1.59105	0.0318864	yes	down
CDK7	Cyclin-dependent kinase 7	9	8	0.114791	0.317494	0.881597	24295010	21316010	24800000	28070990	20409990	20412010	21739990	24045000	35	39.038		25.2045	-0.248457	0.660627	no	up
CDK8	Cyclin-dependent kinase 8;Cyclin-dependent kinase 19	6	6	0.399763	0.638471	0.696853	2762452	4256203	3547299	3438201	767339	4271400	2995902	3443701	15.3	53.283		16.0224	-0.0399411	0.961461	no	up
CDK9	Cyclin-dependent kinase 9	10	9	0.285964	0.537385	1.08887	35697020	38087990	45992980	46974000	42142020	44908000	46056990	47373020	27.7	42.761		69.4777	0.259159	0.419664	no	down
CDKAL1	Threonylcarbamoyladenosine tRNA methylthiotransferase	18	18	0.112124	0.31326	1.1302	47218020	58478970	56665010	47678010	65425960	57151030	57407980	56703980	39.4	65.111		16.0716	-0.164705	0.838266	no	up
CDKL5	Cyclin-dependent kinase-like 5	8	4	0.987176	0.995769	0.993334	1510485	814540	837850	696098	1821418	1590252	529705	455340	10.7	107.52		24.4657	-0.315937	0.561503	no	up
CDKN2AIP	CDKN2A-interacting protein	22	18	0.245095	0.494354	1.13014	30131010	35335000	38196000	41825980	37141000	48930980	41003990	37235000	53.4	61.124		38.2062	0.0841474	0.885252	no	down
CDKN2AIPNL	CDKN2AIP N-terminal-like protein	4	4	0.452498	0.685959	1.49993	2961002	465147	3342802	3761102	2499500	2949800	2971901	3999999	40.5	13.196		24.6167	0.134559	0.838835	no	down
CDON	Cell adhesion molecule-related/down-regulated by oncogenes	5	5	0.508848	0.734436	0.65317	855229	6680701	539429	1175601	1151901	1149729	1192677	417513	5.1	139.15		38.2919	-0.311593	0.480226	no	up
CDS1	Phosphatidate cytidylyltransferase 1	3	3	0.430923	0.668378	0.876845	4727199	4872299	4358001	4435302	4756601	5697398	2999001	3238101	5.9	53.303		11.7763	-0.412491	0.614932	no	up
CDS2	Phosphatidate cytidylyltransferase 2	5	5	0.417631	0.654267	1.32801	11067000	43986990	41935000	26684990	30748000	34598010	39620980	40199000	13.5	51.417		37.6544	0.111142	0.834621	no	down
CDSN	Corneodesmosin	2	1	0.877756	0.947435	0.936099	1484072	337078	1170000	1484800	1228255	489796	1073301	1033479	4.7	51.522
CDV3	Protein CDV3 homolog	17	17	0.338665	0.586284	0.900838	114760000	107930000	138620000	149560000	106110000	113219900	102700000	137059900	74.8	27.335		84.6528	-0.400993	0.148825	no	up
CDYL	Chromodomain Y-like protein	8	3	0.136437	0.350178	1.51071	16506010	12672000	12314010	8802296	32682980	12495010	17013000	16996990	16.9	66.481		93.088	0.202388	0.545416	no	down
CEBPG	CCAAT/enhancer-binding protein gamma	1	1	0.398397	0.63727	1.50561	1393200	664372	1152400	526746	2868999	2108199	526732	906252	20.7	16.408		27.0138	0.530289	0.254904	no	down
CEBPZ	CCAAT/enhancer-binding protein zeta	50	44	0.27407	0.52787	0.864086	435770000	451310200	440920200	430050200	268920000	386709800	464029800	430809900	45.5	120.97		280.431	-0.354328	0.137397	no	up
CECR1	Adenosine deaminase CECR1	1	1	0.661377	0.832385	1.14931	1207052	646592	374730	407650	863640	819370	622408	472300	2.3	58.933
CECR2	Cat eye syndrome critical region protein 2	30	17	0.385588	0.625627	1.05714	40121010	38481010	44243030	40417010	46381030	38220000	47513020	40936980	25.5	164.21		265.705	-0.60401	0.000168083	no	up
CECR5	Cat eye syndrome critical region protein 5	12	12	0.387503	0.627478	0.892484	119140000	106790100	125380000	85148020	124980000	89043010	87846940	88150940	40.4	46.321
CELF1	CUGBP Elav-like family member 1	10	9	0.113926	0.316236	0.644923	112560000	175239900	194259900	129020000	52826010	118680000	115060000	118560100	21.6	52.063		96.8789	-0.168641	0.589495	no	up
CELF2	CUGBP Elav-like family member 2	6	5	0.0388848	0.181305	1.59164	10791000	15288000	17259000	18649990	26606010	16467000	27288000	28504990	14.4	54.27		17.8882	1.14347	0.0213801	yes	down
CELSR1	Cadherin EGF LAG seven-pass G-type receptor 1	9	9	0.149899	0.369894	1.44611	827152	842763	1102726	883783	1983400	1645801	1220499	745737	3.9	329.48		116.28	0.667341	0.0115312	no	down
CELSR2	Cadherin EGF LAG seven-pass G-type receptor 2	6	6	0.1632	0.389877	1.33933	1612401	2297200	3854598	2137700	3062098	3073300	3046701	3425298	2.6	317.45		150.296	0.367424	0.0788947	no	down
CELSR3	Cadherin EGF LAG seven-pass G-type receptor 3	5	5	0.830998	0.925337	1.08362	1610300	825843	1327700	955358	2701933	573002	1491700	1007101	1.9	358.18		159.93	0.711238	0.00256729	no	down
CENPA	Histone H3-like centromeric protein A	1	1	0.841459	0.930664	0.816506	475710	930431	501607	44567	1186663	330510	283820	39508	9.3	15.99		11.1294	-0.461667	0.569608	no	up
CENPB	Major centromere autoantigen B	3	3	0.097424	0.28986	1.29378	2736499	2346301	2979501	2781700	4627703	2837599	3955598	2870399	5.7	65.381		123.094	0.546598	0.05085	no	down
CENPC	Centromere protein C	16	16	0.00762801	0.0795197	1.72292	8310202	9736305	12411990	6764297	17456010	13873000	16545990	14939000	18.1	106.83		28.7343	-0.253069	0.665662	no	up
CENPE	Centromere-associated protein E	37	34	0.615057	0.804587	1.24455	2255800	10362010	9607694	14142000	8358298	8795700	10453000	9914994	16	316.41		111.653	0.278077	0.454574	no	down
CENPF	Centromere protein F	103	102	0.56442	0.772775	1.08313	138850000	195330000	217680000	161110100	163159900	192439900	239949800	173760000	38	357.52		766.07	-0.308155	0.16331	no	up
CENPH	Centromere protein H	3	3	0.0713916	0.243296	2.25395	2629601	2206701	2291200	719037	6916803	3428202	2435000	4273202	13.8	28.481		29.9681	0.585911	0.152891	no	down
CENPI	Centromere protein I	4	4	0.72735	0.872226	0.947028	771970	1143300	1479100	1379400	1018472	1169300	1133401	1073101	5.6	86.719		21.6249	0.323141	0.571964	no	down
CENPL	Centromere protein L	3	2	0.725009	0.87025	0.933004	1269421	1077200	688640	1621300	1185700	1029900	913310	1037300	10.2	38.997		10.4784	0.211444	0.822026	no	down
CENPM	Centromere protein M	3	3	0.855868	0.936649	1.05684	3348402	3498701	4315601	3566598	1824552	6439099	3399299	5632502	17.2	19.737		20.8454	0.11394	0.878081	no	down
CENPN	Centromere protein N	5	5	0.954885	0.984446	0.988172	875050	1677799	1702301	1287100	1365001	1395999	932161	1726800	21.5	39.554		26.4207	0.123654	0.844051	no	down
CENPO	Centromere protein O	3	3	0.0318771	0.165124	1.47139	1289101	775370	1173400	1015700	1450201	1944899	1313999	1506600	15.7	33.785		24.3369	-0.286259	0.613622	no	up
CENPQ	Centromere protein Q	7	7	0.0581122	0.218203	2.09692	1786100	770676	2284700	3069500	3819499	3166400	3097100	4982802	38.4	30.595		4.36902	0.559535	0.679095	no	down
CENPT	Centromere protein T	4	4	0.327951	0.57554	0.661904	7633497	2128999	2280801	1446700	2007401	2549401	1454600	1382701	14.4	60.422		46.8625	0.127375	0.816636	no	down
CENPU	Centromere protein U	9	9	0.0342663	0.170486	1.6203	8703795	6765200	5270199	4467499	12607990	10177000	9608901	7750298	29.9	47.521		60.3999	0.20755	0.641144	no	down
CENPV	Centromere protein V	7	7	0.0521881	0.206497	1.44722	48562990	61743980	82067950	56645010	69536980	80465950	113219900	96519990	45.8	29.946		159.066	0.662578	0.0041692	no	down
CENPVL2	Centromere Protein V Like 2	4	4	0.183789	0.418176	1.36289	17146990	26507980	13403000	23005000	17491010	30661010	31778990	28372010	19.5	29.887
CEP131	Centrosomal protein of 131 kDa	30	27	0.998319	0.998925	1.00026	23680000	28572000	38255990	32260980	25400980	30044010	32284020	33927980	33	122.15		39.2975	-0.0865069	0.872934	no	up
CEP135	Centrosomal protein of 135 kDa	18	12	0.159655	0.384591	0.60527	3105600	7222998	6420499	6777903	1642299	3958298	4513998	4464800	17.2	133.49		23.5262	-0.448077	0.445433	no	up
CEP170	Centrosomal protein of 170 kDa	48	25	0.525218	0.745007	0.913936	27494990	31365010	36769000	37393010	22942010	29430990	30919980	39624020	37.9	175.29		3.96904	0.324815	0.839202	no	down
CEP170B	Centrosomal protein of 170 kDa protein B	19	12	0.518138	0.740495	1.11777	6272704	4719100	6963598	3731000	6648004	5555103	4822103	6741602	15.8	171.69		108.798	0.0304733	0.941091	no	down
CEP192	Centrosomal protein of 192 kDa	21	21	0.740655	0.879077	1.18342	4845903	6614400	8972795	5529501	2190001	20862010	9473202	7206602	11.4	279.11		79.3325	0.112604	0.775253	no	down
CEP250	Centrosome-associated protein CEP250	16	12	0.897355	0.956914	1.04416	1848100	1913300	2232099	2622099	1912501	2570700	1059601	4722202	7.2	281.13		82.8097	-0.286521	0.337263	no	up
CEP350	Centrosome-associated protein 350	10	9	0.00220526	0.0484909	4.82745	433075	1236600	559399	959180	3041300	3212402	2581002	6188798	4.8	350.93		113.35	0.191561	0.546814	no	down
CEP41	Centrosomal protein of 41 kDa	6	6	0.387688	0.627417	0.861639	3955698	3265202	4007998	3149399	2759000	4291302	2173700	3491802	25.5	41.368		6.33073	-0.185204	0.883924	no	up
CEP44	Centrosomal protein of 44 kDa	2	2	0.61679	0.804817	0.874901	2033901	2901099	2616700	2463501	3529998	2693701	2060700	1137354	6.4	44.139		7.10401	0.0300834	0.980754	no	down
CEP55	Centrosomal protein of 55 kDa	7	6	0.693418	0.852466	1.11867	2368501	1616499	962990	1185700	1659700	1800200	2367199	967970	17.7	54.178		18.2476	0.214037	0.772986	no	down
CEP57	Centrosomal protein of 57 kDa	3	3	0.976126	0.99057	1.01115	784379	1044740	1522801	1278201	2506976	509740	1192895	1093800	6.2	57.088		40.1385	0.225999	0.624481	no	down
CEP72	Centrosomal protein of 72 kDa	4	4	0.768574	0.89158	0.856557	3857698	1808600	2863800	2911601	5247998	2745399	3641801	596837	6.2	71.717		22.6676	0.327714	0.566676	no	down
CEP76	Centrosomal protein of 76 kDa	6	6	0.47553	0.704464	0.780515	1859900	1621499	2651002	6280197	2063601	2518900	1502100	2386600	11.7	74.413		21.347	-0.111381	0.881769	no	up
CEP78	Centrosomal protein of 78 kDa	10	9	0.878843	0.9477	0.973444	4036901	3582202	4724999	4763202	3174300	3611098	3954500	6447097	24.2	76.396		51.6737	-0.0456	0.925452	no	up
CEP85	Centrosomal protein of 85 kDa	12	8	0.580593	0.783897	1.07495	5694100	4662203	4399002	5650798	6343399	6594902	4974002	4234398	19.4	85.638		42.84	-0.0314342	0.955267	no	up
CEP97	Centrosomal protein of 97 kDa	10	10	0.112268	0.313515	1.63326	5295902	2470801	2627901	4262600	4232803	4180702	9121394	6461698	15.6	96.98		16.23	0.151572	0.861962	no	down
CEPT1	Choline/ethanolaminephosphotransferase 1	2	2	0.639645	0.818545	0.671401	21490000	16020000	12737000	11302000	1129359	50729010	15491010	11347010	4.8	46.553		15.954	0.210497	0.784804	no	down
CER1	Cerberus	1	1	0.130554	0.342479	1.55879	1124609	360007	726158	816009	988208	964450	1378000	1078484	4.5	30.083		63.4907	0.0746659	0.972995	no	down
CERCAM	Probable inactive glycosyltransferase 25 family member 3	2	2	0.514524	0.737655	1.43895	659206	460567	731217	3420700	1544600	2635500	684490	1168461	4.7	67.591		8.29971	1.27869	0.103533	no	down
CERK	Ceramide kinase	3	3	0.613422	0.80352	0.87558	804006	508231	1166001	723890	1013646	723842	419761	658178	6.5	59.977		51.4087	0.977659	0.00156159	no	down
CERS1	Ceramide synthase 1	3	3	0.251877	0.502134	1.16801	3874898	4849800	4021299	3244799	5918803	4001501	4733302	4070998	13.7	39.536		16.1205	1.14335	0.0319855	yes	down
CERS2	Ceramide synthase 2	6	6	0.144396	0.360846	0.700967	56528980	55700020	77015050	75598980	32344980	43404970	79192010	39809010	19.7	44.876		135.111	0.0834742	0.803869	no	down
CERS4	Ceramide synthase 4	4	4	0.216316	0.459749	1.21697	10177000	12149000	11156000	10327000	16217010	14691010	14755010	8887895	10.7	46.398		67.8113	0.172095	0.725438	no	down
CERS6	Ceramide synthase 6	3	3	0.882646	0.950071	1.17174	6111797	4684600	661111	11928000	16465990	8975595	6993297	411789	6.5	44.889		20.5173	-0.742877	0.138022	no	up
CETN2	Centrin-2	10	8	0.032702	0.165861	1.31068	12466000	16977990	18089010	18070010	22160010	18822000	21837990	22413990	60.5	19.738		14.9811	-0.0213129	0.97931	no	up
CETN3	Centrin-3	4	4	0.517703	0.740278	1.16949	9851700	7478998	9781695	8855803	18744000	9050103	10665000	6599499	23.4	19.55		10.7733	1.08984	0.0947151	no	down
CFAP20	Cilia- and flagella-associated protein 20	7	7	0.615864	0.805008	1.13939	48839980	37640020	36327990	22848990	54682020	56509020	28537010	29164010	38.9	22.774		29.4359	-0.177326	0.751228	no	up
CFAP97	Cilia- and flagella-associated protein 97	4	4	0.703465	0.858112	1.1431	1345900	993106	1140780	877216	1671894	1736199	468010	1681101	10	59.474		36.7158	0.697448	0.0690188	no	down
CFDP1	Craniofacial development protein 1	6	6	0.884688	0.950419	0.98311	48642020	67734950	54290010	40893980	49440000	50784980	47680030	57077030	25.4	33.592		38.7036	0.140578	0.796503	no	down
CFL1	Cofilin-1	19	2	0.654808	0.828923	1.76043	379089900	23342990	16040000	15244000	300199900	313630200	7113297	31030020	77.1	18.502		569.631	0.014523	0.955068	no	down
CFL2	Cofilin-2	8	3	0.0873324	0.273017	1.43279	3035500	3277402	3234798	5979601	4526901	6002404	4849498	6154496	47	18.736		5.78934	-0.414082	0.744842	no	up
CGGBP1	CGG triplet repeat-binding protein 1	6	6	0.0906423	0.278174	1.33942	29349010	18183000	17725010	25515990	29278010	35160990	24623000	30646980	31.1	18.82		35.5843	0.292792	0.516253	no	down
CGN	Cingulin	61	39	0.393533	0.632841	1.10192	260350000	207570000	215159900	172200100	279530000	211980000	216319900	230299900	52.5	136.38		83.0257	0.301512	0.311554	no	down
CGNL1	Cingulin-like protein 1	59	41	0.454396	0.687538	0.917601	104070000	80673980	101529900	74326980	97858980	70480020	81488980	79919000	44.9	149.08		125.785	0.152468	0.612699	no	down
CHAC1	Glutathione-specific gamma-glutamylcyclotransferase 1	2	2	0.881663	0.949742	0.885177	4093298	1201901	439439	723466	5222900	269490	643775	1059721	9.9	24.417		21.9072	1.31933	0.00267609	yes	down
CHAC2	Putative glutathione-specific gamma-glutamylcyclotransferase 2	4	4	0.370584	0.614628	0.676813	4974298	4156101	3892098	3090200	834407	4005402	3652100	4274598	25.5	20.874		6.98765	-0.00600171	0.997453	no	up
CHAF1A	Chromatin assembly factor 1 subunit A	16	16	0.0191053	0.128908	1.31745	28846990	33314020	26941000	27938000	33585990	37902980	47232000	36241020	19.9	106.91		203.011	-0.208551	0.35748	no	up
CHAF1B	Chromatin assembly factor 1 subunit B	16	16	0.200368	0.437732	1.19659	21653990	24021010	23115000	24347010	34746990	23053990	33969000	22054990	42.2	61.492		24.2786	0.463241	0.375104	no	down
CHAMP1	Chromosome alignment-maintaining phosphoprotein 1	33	33	0.00135926	0.0408805	1.20105	117840000	123490100	122409900	117309900	156970000	138580100	144839900	138010000	45.4	89.098		108.24	-0.364116	0.129867	no	up
CHCHD1	Coiled-coil-helix-coiled-coil-helix domain-containing protein 1	1	1	0.290794	0.541146	0.746115	983640	1393900	1223200	1384599	1717399	1041000	672068	598932	13.6	13.475		49.5564	-0.241162	0.58512	no	up
CHCHD2	Coiled-coil-helix-coiled-coil-helix domain-containing protein 2;Putative coiled-coil-helix-coiled-coil-helix domain-containing protein CHCHD2P9, mitochondrial	2	2	0.241959	0.48944	0.774103	10833000	21595010	16731010	23097010	17344990	10791000	13165000	13174000	18.5	15.512		120.814	-1.07723	1.92706e-07	yes	up
CHCHD3	MICOS complex subunit MIC19	14	5	0.843507	0.932068	1.02898	58760990	40210000	33984990	55360040	48010980	48974990	51316000	41300990	46.7	26.152		49.6173	-0.18323	0.690938	no	up
CHCHD4	Mitochondrial intermembrane space import and assembly protein 40	3	3	0.770065	0.891816	1.07062	3789401	4287100	3545601	2985902	6405103	3110798	2476501	4579300	29.6	15.996		10.7125	0.658732	0.367215	no	down
CHCHD6	MICOS complex subunit MIC25	5	5	0.556126	0.767418	0.875576	7183705	8273095	4383402	8253202	8495001	4904199	4415001	6870096	26.4	26.457		16.0951	0.732556	0.204569	no	down
CHD1	Chromodomain-helicase-DNA-binding protein 1	41	32	0.0235746	0.144106	1.18606	49650000	50080030	62658990	53789970	62001980	62655010	67069040	63653000	25.6	196.69		105.328	-0.0145894	0.974255	no	up
CHD1L	Chromodomain-helicase-DNA-binding protein 1-like	26	26	0.128638	0.34131	1.17508	44984000	41008980	45041020	39869000	61684010	50651010	40487980	49930020	31.4	101		104.555	0.108807	0.743128	no	down
CHD2	Chromodomain-helicase-DNA-binding protein 2	36	27	0.0468253	0.198717	1.24132	25536010	22968990	27458990	31364020	29534010	31702990	38630000	33158990	19.5	211.34		68.9808	-0.13728	0.72218	no	up
CHD4	Chromodomain-helicase-DNA-binding protein 4	94	75	0.0108329	0.0935318	1.28194	412940000	432969900	521570200	491149800	614179900	525920000	635000200	603049700	50.9	218		88.7205	0.145995	0.66548	no	down
CHD6	Chromodomain-helicase-DNA-binding protein 6	22	11	0.12032	0.328586	1.63585	3327000	3154900	4827697	1627401	3403198	7062200	5265797	4666100	11.3	305.41		163.836	0.229112	0.327022	no	down
CHD7	Chromodomain-helicase-DNA-binding protein 7	66	25	8.50439e-06	0.0148571	1.90132	41262020	45514030	43647980	41171020	78060020	75543040	90358040	82771980	27.7	335.92		354.605	0.423369	0.00837186	no	down
CHD8	Chromodomain-helicase-DNA-binding protein 8	42	16	0.544853	0.759717	0.952347	50094000	41269010	47929990	54658020	45575990	40189010	49063000	49573980	23.8	290.52		271.9	-0.217774	0.259616	no	up
CHDH	Choline dehydrogenase, mitochondrial	6	4	0.0449675	0.195162	1.96915	1326400	590047	649751	781579	2470400	1778501	1414299	961681	17.8	65.358		12.05	0.760698	0.230702	no	down
CHEK1	Serine/threonine-protein kinase Chk1	14	14	0.927343	0.97233	0.991493	43154010	46122010	47266980	54105000	37474020	50700990	50376000	51394020	29.4	54.433		61.8622	-0.169687	0.684028	no	up
CHEK2	Serine/threonine-protein kinase Chk2	10	7	0.526167	0.745565	1.16016	10895000	17588010	16214000	17711000	10327000	19471990	20095990	24669010	23	60.914		66.0201	0.521812	0.0662119	no	down
CHERP	Calcium homeostasis endoplasmic reticulum protein	24	24	0.832824	0.926423	1.03178	123749900	174200000	211209900	175079900	153480000	144839900	200400100	202790000	35	103.7		142.567	-0.0517171	0.885009	no	up
CHFR	E3 ubiquitin-protein ligase CHFR	5	5	0.155767	0.37895	0.672228	1728099	1720799	1985701	2060400	1122141	688249	1499300	2145600	10.2	73.386		67.5797	-0.424004	0.152354	no	up
CHID1	Chitinase domain-containing protein 1	8	8	0.68503	0.845399	1.03529	22669990	26814990	32940000	25100010	28585980	27788990	27929990	26023990	25.2	44.94		50.8154	-0.0450872	0.930017	no	up
CHKA	Choline kinase alpha	7	7	0.479833	0.708138	0.917732	8643901	6077802	5903899	7158496	5769399	5571704	6358597	7705498	17.9	52.248		31.0521	-0.101553	0.878636	no	up
CHKB	Choline/ethanolamine kinase	3	2	0.736452	0.877447	0.88112	388915	1263700	1223999	1304059	1383535	730652	899873	519798	10.4	45.271		23.0045	0.444789	0.403373	no	down
CHM	Rab proteins geranylgeranyltransferase component A 1	7	5	0.0624127	0.224298	0.495705	10554010	14015010	12286000	14223000	2569956	8756101	7870105	8812298	12.9	73.475		15.6267	-0.977814	0.0653638	no	up
CHML	Rab proteins geranylgeranyltransferase component A 2	6	4	0.529532	0.747582	1.46136	3089702	2335800	3348402	2691099	810774	8776801	4751303	8771906	13.1	74.071		97.8501	-0.447084	0.124254	no	up
CHMP1A	Charged multivesicular body protein 1a	5	5	0.969301	0.987768	0.995168	27745010	24414990	25649010	33788000	31987010	29473980	20690010	29518010	19.9	21.703		36.7291	0.101794	0.856255	no	down
CHMP1B	Charged multivesicular body protein 1b;Charged multivesicular body protein 1b-2;Charged multivesicular body protein 1b-1	3	3	0.639098	0.818336	1.12944	21028990	28304990	19180010	17420000	30338990	29836990	12217000	29261990	12.6	22.109		53.2763	-0.00199924	0.997453	no	up
CHMP2A	Charged multivesicular body protein 2a	7	7	0.899818	0.958105	1.02877	21988990	12872000	11806000	14022990	24255990	14377010	13439000	11200010	25.7	25.104		41.8684	0.0468077	0.933328	no	down
CHMP2B	Charged multivesicular body protein 2b	7	7	0.141727	0.357714	1.25267	20621000	20763010	14464990	20220000	30592010	18772990	23342990	23000990	27.7	23.906		18.9495	0.670442	0.184811	no	down
CHMP4A	Charged multivesicular body protein 4a	6	6	0.821477	0.921213	0.948982	4926098	8309005	7890796	11250000	6995701	5941798	6355899	11154010	30.6	25.098		5.5276	0.264779	0.844908	no	down
CHMP4B	Charged multivesicular body protein 4b	9	9	0.397044	0.636282	0.835623	22701990	30430010	25165000	41684990	27923010	20217990	18281010	34236000	42.4	24.95		50.2732	-0.549348	0.100729	no	up
CHMP5	Charged multivesicular body protein 5	4	4	0.930494	0.974233	0.985541	13628010	14223000	11958000	19942010	18587000	14037000	10633990	15717000	21	24.57		18.3733	0.445554	0.482846	no	down
CHMP6	Charged multivesicular body protein 6	4	4	0.669929	0.835334	0.760048	2963501	5267301	3421501	6922201	9452497	4586001	631718	4505198	19.9	23.485		10.2436	0.570425	0.487117	no	down
CHMP7	Charged multivesicular body protein 7	10	10	0.928341	0.973017	0.968958	18898000	5378699	4259000	8296798	9329300	7234304	6964703	6735704	32	50.91		26.5262	0.482396	0.292026	no	down
CHN1	N-chimaerin	6	6	0.82627	0.923197	0.909099	2789301	4781000	7878704	4629698	2217399	2482399	9644996	6258200	18.3	53.172		23.1298	-0.033873	0.961127	no	up
CHORDC1	Cysteine and histidine-rich domain-containing protein 1	14	14	0.330138	0.578189	0.759406	110520000	188830100	147420000	146630000	55374020	136410000	125800000	157890000	49.4	37.489		22.9212	0.0382107	0.958732	no	down
CHP1	Calcineurin B homologous protein 1	9	9	0.218759	0.461656	1.15965	48763010	51317020	58570960	51564980	48201010	57763970	78273010	62714020	41.5	22.456		17.5944	0.00294618	0.997582	no	down
CHPF	Chondroitin sulfate synthase 2	11	6	0.927592	0.972481	1.01076	8055505	11576000	8190905	11737000	8979797	9399696	10144010	10928010	17.9	85.466		241.44	-0.512894	0.0247704	no	up
CHPF2	Chondroitin sulfate glucuronyltransferase	4	4	0.0184864	0.125137	2.10449	1042341	1608900	801497	2099399	2564000	3320901	2922901	2223999	6.1	85.947		56.8168	0.052403	0.913204	no	down
CHRAC1	Chromatin accessibility complex protein 1	3	3	0.0135878	0.108291	1.55925	7148197	6047104	6504003	4973101	12857000	9180894	8680295	8066002	31.3	14.71		11.4365	-0.384785	0.65094	no	up
CHST10	Carbohydrate sulfotransferase 10	5	5	0.413805	0.652796	1.23759	1310623	980022	1753201	1127600	2674995	1034200	1730001	1244601	16.3	42.206		26.6758	0.0905191	0.891407	no	down
CHST12	Carbohydrate sulfotransferase 12	3	3	0.0600985	0.220584	1.49397	841540	615053	825866	520896	930519	866920	1504536	913930	7.2	48.414		37.3585	-0.253627	0.585913	no	up
CHST14	Carbohydrate sulfotransferase 14	9	9	0.580014	0.783629	1.08083	11519000	15996000	18437000	13953000	13563000	15238000	20436990	15315010	29.8	42.996		26.0758	0.624474	0.148712	no	down
CHST6	Carbohydrate sulfotransferase 6;Carbohydrate sulfotransferase 5	2	2	0.000695771	0.0373458	3.02917	852630	406180	528392	701620	1515600	2007199	1894300	1875900	6.1	44.098		17.0132	1.82595	0.000166632	yes	down
CHSY1	Chondroitin sulfate synthase 1	9	9	0.0111973	0.095741	2.70013	1546801	4690401	4272699	2418199	6843797	10025000	6915203	8398295	13.7	91.783		157.735	-0.333771	0.124164	no	up
CHTF18	Chromosome transmission fidelity protein 18 homolog	17	15	0.258654	0.511329	0.891925	17805990	19052000	19722010	21520000	16768990	14056000	18662990	20713990	24.7	107.38		89.3306	-0.190292	0.59007	no	up
CHTF8	Chromosome transmission fidelity protein 8 homolog isoform 2	5	5	0.760661	0.886125	0.920271	7314598	9575599	9608495	16049000	5852298	9182897	9159399	15738000	17	51.391		26.2095	-0.382701	0.438995	no	up
CHTOP	Chromatin target of PRMT1 protein	7	7	0.0404595	0.185613	1.30198	102020000	131980000	151300000	132500000	169560100	140820000	176739900	183800000	37.5	26.396		62.2856	-0.129604	0.76007	no	up
CHUK	Inhibitor of nuclear factor kappa-B kinase subunit alpha	8	8	0.0314055	0.163163	1.25983	4636301	4827602	5125200	4053801	5351398	5730303	5386000	7092797	11.8	84.639		26.5586	-0.540395	0.233947	no	up
CHURC1	Protein Churchill	2	2	0.385067	0.625436	0.559804	2460800	5313301	4575101	5693098	4522498	664049	1260769	8833201	15.1	16.111		28.3685	-0.0563705	0.928294	no	up
CIAO1	Probable cytosolic iron-sulfur protein assembly protein CIAO1	6	6	0.448211	0.681437	1.68897	9379300	5205700	6562599	582726	9274698	6112201	4385298	6111902	19.5	37.84		59.0375	-0.165085	0.708918	no	up
CIAPIN1	Anamorsin	15	15	0.290114	0.540936	1.16293	61974030	62677960	45852970	77563970	88030060	66687960	64709040	66515020	42.6	33.582		42.7869	0.160204	0.741703	no	down
CIB1	Calcium and integrin-binding protein 1	5	5	0.584896	0.786769	0.868845	2438599	3566999	3825802	6805901	3677902	3024300	2581002	4495803	34.6	21.703		13.5378	0.483301	0.490406	no	down
CIC	Protein capicua homolog	7	5	0.897437	0.956842	1.016	1966600	2459001	1913801	2173499	1944601	2558000	2553300	1687601	9.8	163.82		155.248	-0.150672	0.698689	no	up
CIRBP	Cold-inducible RNA-binding protein	7	7	0.232887	0.478331	1.15941	64979000	73514960	87930950	91301050	106889900	73987960	97402060	89958970	43.6	18.648		33.9775	0.00215794	0.997708	no	down
CIRH1A	Cirhin	20	20	0.483918	0.710877	0.944077	122280100	128609900	152130000	133190000	110909900	126380000	148770000	121390000	36.3	76.889
CISD1	CDGSH iron-sulfur domain-containing protein 1	4	4	0.636308	0.816185	0.651314	110110000	12275000	22680000	18703010	132139900	7255904	5662899	19001990	42.6	12.199		16.372	-0.0379624	0.963695	no	up
CISD2	CDGSH iron-sulfur domain-containing protein 2	7	7	0.919948	0.967955	1.01194	123229900	150159900	172980000	154750000	116290000	157430000	166910000	169980000	48.1	15.278		24.7177	-0.0368687	0.959132	no	up
CIT	Citron Rho-interacting kinase	49	10	0.0165822	0.119186	1.27483	13548000	13493990	14012000	11672990	19360000	14761990	17742000	15576010	27.8	231.43		103.115	0.48675	0.0326856	no	down
CITED2	Cbp/p300-interacting transactivator 2	1	1	0.19957	0.436177	0.628221	1034399	1165001	2626352	668286	782038	957650	492189	893743	9.7	28.321		47.0916	1.07347	0.00027959	yes	down
CIZ1	Cip1-interacting zinc finger protein	11	11	0.187794	0.422783	1.1474	9780401	9248201	9388096	10729010	12022990	9030203	13546010	10736990	18.2	100.04		96.945	-0.0677038	0.853393	no	up
CKAP2	Cytoskeleton-associated protein 2	11	11	0.367828	0.613194	1.12253	15968000	18752010	19972010	23669010	18249010	19437010	26250990	24136980	20.4	76.986		93.8195	0.0479145	0.911491	no	down
CKAP2L	Cytoskeleton-associated protein 2-like	7	7	0.297719	0.546671	1.16526	3775400	3456998	3935099	3062200	3961303	4832998	2971598	5096800	10.7	83.586		31.3413	-0.237487	0.682461	no	up
CKAP4	Cytoskeleton-associated protein 4	33	22	0.00422316	0.0588805	1.46091	170700000	144400000	208970100	169480000	276359900	254040000	230009900	246250100	59.5	66.022		202.017	0.989694	1.48691e-07	no	down
CKAP5	Cytoskeleton-associated protein 5	87	34	0.111298	0.311214	0.872315	152400100	162259900	143820000	131790000	126620000	120239900	117350000	151900000	46.5	225.49		358.695	0.17551	0.420739	no	down
CKB	Creatine kinase B-type	19	7	0.0820564	0.265597	0.754313	98812970	88756000	89929960	106830000	79321000	68202040	52433990	96165010	62.2	42.644		478.049	0.0923879	0.768002	no	down
CKMT1A	Creatine kinase U-type, mitochondrial	15	11	0.652104	0.827381	0.876156	254580000	295900200	184310100	153709900	262750100	276030200	173590000	99890020	42	47.036
CKS1B	Cyclin-dependent kinases regulatory subunit 1	3	2	0.617882	0.804981	0.872773	9165104	9159799	8348601	9694894	3783900	9518095	12402000	8826803	32.9	9.6601		32.657	0.268579	0.571809	no	down
CKS2	Cyclin-dependent kinases regulatory subunit 2	3	2	0.0917258	0.280063	0.710208	8218598	8482600	7333199	8428305	3769599	6040201	8519396	5651299	32.9	9.8742		50.9178	-0.0241848	0.962969	no	up
CLASP1	CLIP-associating protein 1	55	50	0.0190625	0.129095	1.228	131000100	149410000	144579900	138620000	196519900	148240100	175250100	174720100	41.7	169.45		104.276	0.0206377	0.957868	no	down
CLASP2	CLIP-associating protein 2	34	10	0.878488	0.947807	0.982757	25714000	18559010	21915010	27435990	23780990	21515990	19660000	26607000	34.2	141.06		88.5811	-0.0962521	0.796686	no	up
CLASRP	CLK4-associating serine/arginine rich protein	4	4	0.29955	0.547634	0.693665	2912998	3448499	3752301	3009399	878831	3052402	3350802	2921800	6.9	76.824		38.7024	-0.113756	0.845551	no	up
CLCC1	Chloride channel CLIC-like protein 1	11	11	0.675498	0.838876	0.964202	13873000	14689000	15608990	16340990	17689000	12576000	13415000	15054000	27	62.022		21.2783	-0.236542	0.712098	no	up
CLCN3	H(+)/Cl(-) exchange transporter 3	6	5	0.933755	0.975814	1.01852	3803898	2074501	3437101	2363999	1836249	3615799	3079299	3375002	6.2	90.811		48.0837	-0.284322	0.452005	no	up
CLCN5	H(+)/Cl(-) exchange transporter 5	5	4	0.0324856	0.166008	0.436923	5695500	5620504	4794901	5403402	983775	3033698	3713398	2727300	6.4	90.705
CLCN6	Chloride transport protein 6	9	9	0.282695	0.535759	1.57072	5557101	4302299	1092300	3373699	6383402	5713502	3711601	3961601	14.8	97.288		22.1139	-0.38645	0.553875	no	up
CLCN7	H(+)/Cl(-) exchange transporter 7	9	9	0.1541	0.375984	1.43356	3250398	6149998	7534904	4915103	10162010	5438498	7609002	7435304	11.2	88.678		45.6608	0.217661	0.680455	no	down
CLDN10	Claudin-10	1	1	0.236452	0.48285	1.72972	663708	702101	607265	293769	1075100	899530	2120496	362881	5.7	24.488		14.4958	1.40066	0.00765754	yes	down
CLDN12	Claudin-12	1	1	0.497439	0.723396	0.711793	3555200	967212	2745700	1713668	513450	1300400	2534001	2454701	6.1	27.11		27.2259	0.562084	0.181397	no	down
CLDN14	Claudin-14	1	1	0.288988	0.53958	1.34369	2037500	2528499	908140	1534401	2558802	2780800	2064700	1592900	5.4	25.699
CLDN3	Claudin-3	2	1	0.929562	0.973597	1.0417	1134800	813199	783370	1095990	2700601	1292599	345966	772520	13.6	23.318		14.9141	1.92786	0.000341337	yes	down
CLDN6	Claudin-6	5	4	0.63668	0.816419	1.21479	196950100	213520000	340330100	462900000	149319900	313220000	753689500	409289700	21.4	23.291		503.508	0.0176123	0.959048	no	down
CLDN7	Claudin-7	1	1	0.614874	0.804931	0.890403	798662	703092	597994	1114607	1111406	743790	541960	525109	7.6	22.418		45.025	-0.43083	0.289716	no	up
CLDND1	Claudin domain-containing protein 1	3	3	0.782048	0.900016	1.16996	1047689	6444404	6426699	5996400	1956639	7949202	6110101	5129803	16.2	28.603		31.7774	0.46525	0.286664	no	down
CLEC16A	Protein CLEC16A	4	4	0.844997	0.931733	1.05518	661034	670230	499650	528950	1255814	622000	433680	428500	5.8	117.71		28.1538	-0.872762	0.0335949	no	up
CLGN	Calmegin	2	2	0.00340726	0.058014	2.52212	602140	624950	565815	334384	1675000	1562499	943890	1166200	3.9	70.038		4.04763	1.51103	0.184268	no	down
CLIC1	Chloride intracellular channel protein 1	14	3	0.864842	0.942527	1.05574	14280000	8222500	9099906	4111201	7450497	12375990	5872597	10078000	74.3	26.922
CLIC4	Chloride intracellular channel protein 4	17	17	0.172118	0.404069	1.5564	71689980	48084030	52881000	28589010	116250000	94108990	45073000	62015010	75.5	28.772		96.5771	0.386643	0.192719	no	down
CLINT1	Clathrin interactor 1	22	22	0.00541439	0.0652379	0.808966	168780000	165890100	166580000	166910000	131620000	125180000	129390000	156390000	32.5	68.259		106.664	-0.740803	0.000536387	no	up
CLIP1	CAP-Gly domain-containing linker protein 1	33	17	0.153728	0.375725	1.23204	11550000	10434000	14862000	13714000	12449000	14921000	15125000	20144010	25.2	162.24		47.3208	-0.0452236	0.928197	no	up
CLIP2	CAP-Gly domain-containing linker protein 2	17	14	0.667837	0.834579	1.14547	14139010	16186010	18756990	6630098	22095000	18591010	9349797	12758000	20.8	115.84		64.6683	0.75724	0.00508241	no	down
CLK3	Dual specificity protein kinase CLK3	5	5	0.924453	0.970491	0.954801	17213000	20514000	9349699	6513503	12259000	21728010	17389990	3858300	9.4	73.514		20.8329	0.31243	0.605108	no	down
CLK4	Dual specificity protein kinase CLK4;Dual specificity protein kinase CLK1	3	2	0.0452227	0.19546	1.61174	1858499	1730800	2031201	1230364	3593002	3453901	1928400	2266801	8.5	57.491		9.7715	-0.494858	0.569088	no	up
CLN3	Battenin	1	1	0.0193647	0.129842	1.5451	527706	867978	596860	707480	1116436	1241334	931097	854270	3.9	47.622		15.7781	0.113006	0.893534	no	down
CLN5	Ceroid-lipofuscinosis neuronal protein 5	3	3	0.0440941	0.193474	1.40587	3098898	1725700	2805300	2454999	3227399	3450099	3882498	3327999	8.1	41.496
CLN6	Ceroid-lipofuscinosis neuronal protein 6	2	2	0.42282	0.659245	1.95194	14308000	9183905	12948000	760333	4687103	10709000	24519010	15259000	10.3	35.919		47.3922	-0.212116	0.68029	no	up
CLN8	Protein CLN8	4	4	0.219528	0.461403	0.783867	9137000	5070099	7110401	4605900	4032900	4667698	5972198	5095002	13.6	32.787
CLNS1A	Methylosome subunit pICln	7	7	0.227118	0.472208	0.899337	56742970	52817000	54382960	48026020	57323030	44129990	41509990	48763970	48.9	26.215		74.5422	0.23341	0.475365	no	down
CLP1	Polyribonucleotide 5-hydroxyl-kinase Clp1	8	8	0.246012	0.495336	0.916807	30694990	32724010	39655990	35184010	30035000	29841020	35355000	31247010	17.2	47.645		41.5982	0.252065	0.567711	no	down
CLPB	Caseinolytic peptidase B protein homolog	18	18	0.207584	0.448021	0.843465	43390970	49858980	43108000	33872000	43487000	38855010	32583020	29041000	28.6	78.728		25.3437	-0.93625	0.0268219	no	up
CLPP	ATP-dependent Clp protease proteolytic subunit, mitochondrial	10	10	0.151068	0.372061	1.19482	48919010	55779980	59067010	45393000	78802030	63482980	51514970	57859970	38.3	30.18		70.7453	-0.04087	0.934094	no	up
CLPTM1	Cleft lip and palate transmembrane protein 1;Cleft lip and palate transmembrane protein 1 homolog	18	18	0.84454	0.931645	1.01596	160130100	133850000	128070000	153120100	171330100	141110000	139440000	132830000	35.1	76.096		132.13	-0.0922499	0.783561	no	up
CLPTM1L	Cleft lip and palate transmembrane protein 1-like protein	7	7	0.669733	0.835526	1.09152	11357000	10107010	15711000	15078000	21643000	12002000	10146000	14645010	13.9	62.228
CLPX	ATP-dependent Clp protease ATP-binding subunit clpX-like, mitochondrial	31	31	0.00532979	0.064946	0.79819	452690000	442529700	496490100	392470200	345980100	338409800	369640100	366110100	47.4	69.223		50.5587	-0.529687	0.131538	no	up
CLSPN	Claspin	14	14	0.0560502	0.213454	0.721723	7659498	9213798	10046000	8770700	7510299	5475798	8345302	4915903	15	151.09		62.3308	-0.0120476	0.97931	no	up
CLSTN1	Calsyntenin-1;Soluble Alc-alpha;CTF1-alpha	8	8	0.379772	0.62139	2.10074	10597990	4358998	13654000	7915203	16691000	118070000	3115700	15836000	9.8	109.79		174.554	-0.130124	0.647015	no	up
CLSTN3	Calsyntenin-3	4	4	0.655272	0.828619	1.17308	1105799	347708	1131501	1081800	581300	1002500	1220201	1253400	6.2	106.1		48.9385	0.345942	0.37338	no	down
CLTA	Clathrin light chain A	9	9	0.839669	0.9301	0.945159	206020100	108430000	117150000	160670000	227950100	124720000	78152960	151020000	23.8	27.076		140.343	-0.18234	0.486056	no	up
CLTB	Clathrin light chain B	8	8	0.850837	0.934262	1.04209	11106010	15252990	7515603	14224000	14806010	9188605	9978905	15730990	25.3	25.171		17.2211	-0.874268	0.11071	no	up
CLTC	Clathrin heavy chain 1	87	2	0.682953	0.843908	0.929105	41037020	62504020	80154960	56642010	54778040	56419000	41492000	67673020	58.7	191.61		805.311	-0.170282	0.391931	no	up
CLU	Clusterin;Clusterin beta chain;Clusterin alpha chain	12	12	0.441585	0.676045	0.747204	44705000	80639970	51094970	16159010	32629010	40161980	28070990	25221990	33.2	52.494		173.796	-0.0246838	0.94017	no	up
CLUH	Clustered mitochondria protein homolog	54	14	0.00010129	0.014	0.468819	66160960	73472980	65010970	77897030	27174990	32647010	35419980	37844000	49.6	146.67		272.498	-1.49565	8.64969e-19	yes	up
CLYBL	Citrate lyase subunit beta-like protein, mitochondrial	7	7	0.0423092	0.189172	2.1798	624075	2211301	2179101	1134600	2982580	3097899	2961100	2815499	30.9	37.359		6.08289	0.900469	0.352077	no	down
CMAS	N-acylneuraminate cytidylyltransferase	12	12	0.161693	0.387315	0.808873	84361980	61008980	45191030	62952010	47344970	55649010	49919000	47657020	33.4	48.379		73.771	0.305715	0.374026	no	down
CMBL	Carboxymethylenebutenolidase homolog	4	4	0.312777	0.561807	1.62186	1866001	1438100	855333	6055200	4607198	2862800	2293601	3178899	15.1	28.048		5.4866	0.998732	0.308207	no	down
CMC1	COX assembly mitochondrial protein homolog	2	2	0.154707	0.377462	1.69708	1773701	2624901	1540199	1107014	5145800	3880502	2063699	1597901	17.9	12.49		4.92499	0.104689	0.944854	no	down
CMC2	COX assembly mitochondrial protein 2 homolog	1	1	0.458705	0.691786	0.779434	1394144	3546600	3449301	3265400	1668782	1300577	3283200	2884501	12.7	9.4598		3.94252	-0.978308	0.448092	no	up
CMIP	C-Maf-inducing protein	10	10	0.973369	0.989263	1.00874	9205494	9094301	6730497	8158601	4078098	10728000	9624896	11304000	19.4	86.33		77.9852	0.17623	0.620346	no	down
CMPK1	UMP-CMP kinase	11	11	0.419322	0.655489	0.914088	35851010	52288960	41373020	48949030	37477990	42183000	35930020	46661000	51.5	22.222		24.9359	-0.535982	0.246412	no	up
CMSS1	Protein CMSS1	8	8	0.232623	0.478242	0.573025	77394030	55795980	70086980	38817020	51864990	57228000	40173020	10623010	22.6	31.884		23.7588	-0.425419	0.438728	no	up
CMTM6	CKLF-like MARVEL transmembrane domain-containing protein 6	2	2	0.0267862	0.151329	1.39884	4895499	3734499	4436000	4594698	7919003	6460698	4998399	5579097	15.8	20.419		23.1918	-0.500779	0.333539	no	up
CMTR1	Cap-specific mRNA (nucleoside-2-O-)-methyltransferase 1	17	17	0.22871	0.474303	0.864777	29134990	26102000	25769000	27743000	20017000	28136010	19197000	28122990	22.6	95.32		44.4207	0.104072	0.834014	no	down
CNBP	Cellular nucleic acid-binding protein	3	3	0.186204	0.420192	0.43309	8543895	6691299	6834403	5975602	594719	3820302	7167397	5044198	13	19.463		197.764	0.0219742	0.945317	no	down
CNDP2	Cytosolic non-specific dipeptidase	23	18	0.0172815	0.120962	1.25216	364569800	366209900	344459800	327220200	489900100	431540100	368850200	474410200	54.7	52.878		159.54	-0.0316567	0.924605	no	up
CNN1	Calponin-1	8	8	0.00163012	0.0440667	0.401566	25161010	21680000	16211000	12195010	8203997	6475398	7004196	7536299	35.7	33.17
CNN2	Calponin-2	13	12	0.174835	0.406906	0.766119	257360000	254529900	296560100	333349900	253280100	154270000	181420100	314710100	51.5	33.697		251.72	-0.184366	0.40866	no	up
CNN3	Calponin-3	15	3	0.676168	0.839007	0.865586	41492000	27385000	103800000	39814010	40259000	30313010	33494020	64489980	57.8	36.413		178.145	0.403826	0.0951116	no	down
CNNM2	Metal transporter CNNM2	8	6	0.364001	0.611327	1.39879	2956199	1607701	1704001	1857099	3788199	4283400	1096500	3236098	11.7	96.622		30.627	0.498235	0.246412	no	down
CNNM3	Metal transporter CNNM3	19	18	0.38952	0.629522	1.07011	41023020	37663010	42892020	37260020	35352010	47327010	42503990	45532020	27.7	76.118		64.3914	-0.139764	0.747117	no	up
CNNM4	Metal transporter CNNM4	8	6	0.356151	0.604104	1.207	12441010	8797898	13199990	6020397	10648010	13477000	11142990	11544990	12	86.606		23.8973	0.205294	0.728582	no	down
CNOT1	CCR4-NOT transcription complex subunit 1	68	68	0.380547	0.62159	1.05474	293970000	270100100	264370000	318090000	297199900	280620100	296110000	334620200	33.3	266.94		681.872	-0.0757095	0.712946	no	up
CNOT10	CCR4-NOT transcription complex subunit 10	16	16	0.639337	0.818492	0.974778	38994010	38992980	37151020	36849980	42838980	34402020	35973980	35448980	28	82.309		42.1078	-0.0973733	0.856532	no	up
CNOT11	CCR4-NOT transcription complex subunit 11	8	8	0.483519	0.710472	1.04722	26003010	24995000	23271010	24356990	29446990	26814000	22448990	24995990	21.8	55.215		92.115	-0.503599	0.03629	no	up
CNOT2	CCR4-NOT transcription complex subunit 2	18	18	0.334434	0.583744	0.904432	38836010	44573980	44528980	41078980	32491990	32920020	43327970	45717020	54.4	59.737		57.0443	-0.124663	0.801792	no	up
CNOT3	CCR4-NOT transcription complex subunit 3	11	11	0.6662	0.834144	1.04187	37744010	34088000	42958990	34613020	40232020	34824980	34286000	46926020	25.1	81.871
CNOT4	CCR4-NOT transcription complex subunit 4	6	6	0.8328	0.92652	1.06474	3770501	9589002	10005000	9920999	5900801	7050603	9420696	11768000	13.6	63.473		21.4702	-0.223713	0.724083	no	up
CNOT6L	CCR4-NOT transcription complex subunit 6-like	5	3	0.518726	0.740609	0.790425	2019299	1862700	1724001	1287600	2848699	1042600	621579	1765400	11.4	63.001		11.7583	0.0285103	0.975982	no	down
CNOT7	CCR4-NOT transcription complex subunit 7	7	7	0.539137	0.755175	0.931535	20077010	16351000	20961010	23047010	15856000	16698990	19995000	22556000	32.3	32.745		68.1642	-0.372064	0.234511	no	up
CNOT8	CCR4-NOT transcription complex subunit 8	5	5	0.382339	0.6235	1.15697	3706002	3173000	5665003	4762900	4158701	4300002	5907600	5381501	22.6	33.54		27.6558	0.0285902	0.967607	no	down
CNP	2,3-cyclic-nucleotide 3-phosphodiesterase	18	18	0.558253	0.768746	1.05083	120260000	103290000	121440000	112190000	145669900	120669900	111360000	105420000	38	47.578		74.4557	0.586759	0.0235748	no	down
CNPY2	Protein canopy homolog 2	7	7	0.431549	0.668855	1.06887	85118980	83020980	87821980	109120000	107600000	85575960	100380000	95635040	42.3	20.652
CNPY3	Protein canopy homolog 3	7	7	0.129494	0.341269	1.50224	60939010	33746000	57289020	35973980	104650000	67727970	68068010	44739000	22.3	30.748		48.1413	-0.463103	0.157479	no	up
CNPY4	Protein canopy homolog 4	5	5	0.690212	0.849424	1.09048	2636999	4670099	5615698	6225102	5562099	4331898	4351000	5806903	18.5	28.309		4.06268	-0.0599143	0.971271	no	up
CNST	Consortin	5	5	0.757723	0.884677	1.08546	1552400	2275001	737022	1350501	1883599	1581100	1184800	1383001	11	79.596		25.3232	-0.0573941	0.933043	no	up
CNTLN	Centlein	8	6	0.530077	0.748248	1.19625	658410	878298	981200	468185	647378	586070	1485477	965210	6.6	161.57		26.2247	0.0860386	0.901137	no	down
CNTN1	Contactin-1	15	5	0.00625708	0.0703262	0.633343	2840301	2904600	2905099	3189398	1367300	2190401	1938200	2118801	20.1	113.32		23.5052	-0.448137	0.381763	no	up
CNTNAP2	Contactin-associated protein-like 2	4	3	0.125209	0.335954	0.559181	3781399	5326503	7045004	6907802	2494199	5822901	1550400	4256101	3.8	148.2
CNTNAP5	Contactin-associated protein-like 5	1	1	0.192027	0.42929	0.503609	1915201	3042700	5549803	723292	1682162	1339400	807836	826679	0.8	145.62
COA1	Cytochrome c oxidase assembly factor 1 homolog	6	6	0.463745	0.695229	1.25024	8323595	8070696	10715000	11800000	16024000	22190000	7329700	7962697	43.2	16.694		38.1577	0.258904	0.561404	no	down
COA3	Cytochrome c oxidase assembly factor 3 homolog, mitochondrial	3	3	0.375758	0.617515	1.70106	5929697	4253002	4533801	594558	8044905	4255899	4091502	4063202	30.2	11.731		21.8933	0.456118	0.421563	no	down
COA4	Cytochrome c oxidase assembly factor 4 homolog, mitochondrial	2	2	0.768985	0.891438	1.13226	1346560	573386	566987	494601	1937301	652530	395040	712593	17.2	10.134		37.7038	-0.28181	0.571532	no	up
COA6	Cytochrome c oxidase assembly factor 6 homolog	2	2	0.154994	0.377267	1.50494	3753502	6304297	3116199	3573399	10809000	5684998	4550699	4833503	12.8	14.116		8.16389	0.147331	0.898324	no	down
COA7	Cytochrome c oxidase assembly factor 7	8	8	0.00288717	0.0545385	1.26663	27286010	22091000	22817990	24097000	29375990	31243000	29882980	31105020	28.6	25.709		25.9426	-0.687334	0.0994491	no	up
COASY	Bifunctional coenzyme A synthase;Phosphopantetheine adenylyltransferase;Dephospho-CoA kinase	12	12	0.887304	0.951526	0.982264	39631980	33344990	24742010	32318990	32618010	37325980	26394990	30612000	30.9	62.328		94.9243	-0.0530308	0.899659	no	up
COBL	Protein cordon-bleu	13	13	0.0260615	0.149611	0.297435	24242010	14186010	16833000	3734499	3570901	3463998	4288199	3189799	14	135.62		67.7776	0.0507127	0.913491	no	down
COBLL1	Cordon-bleu protein-like 1	3	3	0.000204114	0.0217391	0.442738	842610	950710	1304200	1107489	466369	441494	426089	506748	3.8	123.87		15.9888	-0.445019	0.513247	no	up
COG1	Conserved oligomeric Golgi complex subunit 1	21	21	0.615317	0.804436	0.945826	25709000	27151000	28119020	28297990	19174000	27032010	27930980	30704000	25	108.98		39.8885	-0.19448	0.693592	no	up
COG2	Conserved oligomeric Golgi complex subunit 2	20	14	0.73431	0.876304	0.978039	19591010	19494990	20413010	18789010	16473010	22109990	19147000	19219990	39.7	83.207		50.5598	-0.280351	0.473249	no	up
COG3	Conserved oligomeric Golgi complex subunit 3	25	25	0.480293	0.708373	0.958255	37471000	39394980	39122020	41040980	35202990	43164000	38692000	33992000	36.6	94.095		19.9837	0.443894	0.437058	no	down
COG4	Conserved oligomeric Golgi complex subunit 4	21	21	0.302791	0.551198	0.954789	39959970	45463990	44659980	47451000	44440000	41557980	40767020	42496010	33.9	89.082		57.858	-0.160642	0.689105	no	up
COG5	Conserved oligomeric Golgi complex subunit 5	18	6	0.499354	0.725643	1.1038	7234801	8716197	8910402	7352401	12881990	7522999	8059905	7851201	24	92.742		30.1559	0.37307	0.438668	no	down
COG6	Conserved oligomeric Golgi complex subunit 6	12	12	0.963786	0.986691	0.991978	13261000	20092990	20009990	15479990	11499990	19630000	16681010	21222990	23.3	73.278		14.3977	-0.250094	0.751756	no	up
COG7	Conserved oligomeric Golgi complex subunit 7	20	20	0.13153	0.343252	1.07352	32824010	38746980	33267010	34034000	36373980	37051980	36623020	38746980	34.5	86.343		23.9494	0.25103	0.669491	no	down
COG8	Conserved oligomeric Golgi complex subunit 8	13	7	0.311878	0.561166	0.759716	3149599	7477100	7095798	5384803	3317000	3132200	4992402	5779102	24.7	68.423		49.0898	0.208183	0.630218	no	down
COIL	Coilin	15	15	0.0185764	0.126079	1.17791	49213000	48792990	56882000	52823980	60339030	55354980	63658970	65323970	30.9	62.608		34.3329	0.259241	0.588713	no	down
COL12A1	Collagen alpha-1(XII) chain	18	4	0.674641	0.838231	0.741406	418565	928126	3202399	2710499	893254	549919	511497	4055098	7.6	333.14		7.81023	0.152567	0.892872	no	down
COL14A1	Collagen alpha-1(XIV) chain	11	10	0.0440762	0.193634	4.82633	3355501	405294	1023364	740760	9740502	9189698	4045802	1544600	8.7	193.51		26.5521	1.6378	1.15074e-05	yes	down
COL18A1	Collagen alpha-1(XVIII) chain;Endostatin	16	15	0.600582	0.796415	1.14615	68242990	128140000	113250000	61951010	115970000	150129900	87955950	69137030	12.3	178.19		502.076	0.623215	0.00129531	no	down
COL1A1	Collagen alpha-1(I) chain	8	1	0.214173	0.456656	0.626086	1855001	840098	1940500	1276001	1331738	893363	401039	1242633	5.5	138.94		29.9076	0.241398	0.646489	no	down
COL1A2	Collagen alpha-2(I) chain	7	2	0.301704	0.54969	0.675152	1412500	1441000	3992402	3591302	857927	1963301	1996700	1802999	6.5	129.31		43.7357	1.10156	0.000141264	yes	down
COL26A1	Collagen alpha-1(XXVI) chain	2	2	0.149457	0.369504	3.38095	9546501	6042197	3117901	417215	15117000	15645000	5611802	7387097	9.3	45.381		38.7334	1.32841	2.13303e-05	yes	down
COL4A2	Collagen alpha-2(IV) chain;Canstatin	7	4	0.194024	0.431363	1.22823	7185101	11035010	10002010	6885099	11755000	11855990	10450000	8531897	6.1	167.55		209.265	0.119557	0.711109	no	down
COL4A3BP	Collagen type IV alpha-3-binding protein	14	14	0.235276	0.480795	0.76808	25038990	27490010	35020010	41244020	17985990	26514990	19544000	37124010	26.3	70.834
COL5A2	Collagen alpha-2(V) chain	6	3	0.768681	0.891449	1.0622	3514701	3874202	3537202	2034399	2344401	4239002	3839701	3268899	6.7	144.91		69.757	-0.0638505	0.882909	no	up
COL6A1	Collagen alpha-1(VI) chain	12	8	0.0737829	0.249139	1.67994	20685990	13451000	22385000	28356000	21574010	31367000	49685990	41837980	14.2	108.53		395.373	0.0773297	0.925452	no	down
COL6A2	Collagen alpha-2(VI) chain	9	5	0.0308021	0.161718	1.27664	11309000	10777000	13396000	9019203	15001010	14474000	13010000	13847000	10.8	108.58		259.945	0.668035	0.188898	no	down
COL6A3	Collagen alpha-3(VI) chain	9	9	0.558853	0.769368	0.54027	1185501	3058000	9670597	9194000	740146	3843998	469413	20562990	3	343.67		12.184	1.294	0.0334255	yes	down
COLGALT1	Procollagen galactosyltransferase 1	16	9	0.0117166	0.0983345	2.93955	4529601	12742990	16126990	11944000	37080990	35131020	27857010	22876010	26.4	71.635		77.5581	0.521974	0.0482148	no	down
COLGALT2	Procollagen galactosyltransferase 2	3	3	0.0714194	0.24326	1.82629	1216001	664627	1003900	768352	2523780	1392699	882670	2235303	6.2	72.923
COMMD1	COMM domain-containing protein 1	1	1	0.218292	0.46177	1.57451	299012	376393	768920	1079500	659506	772559	898100	1254700	7.4	21.178		16.4153	0.0196566	0.980037	no	down
COMMD10	COMM domain-containing protein 10	4	4	0.337984	0.586065	1.46844	1280299	500651	1751100	1955101	2406399	1384400	1165001	2628999	26.2	22.966		14.331	0.313975	0.690938	no	down
COMMD3	COMM domain-containing protein 3	2	2	0.252584	0.503473	1.53001	806303	1037899	675070	284050	767541	939854	1643346	741795	11.8	22.151
COMMD4	COMM domain-containing protein 4	2	2	0.61788	0.805117	0.807893	2147600	1558701	1083500	555239	1412151	425923	1005610	1418400	10.1	21.764		40.4418	-0.0133115	0.979668	no	up
COMMD7	COMM domain-containing protein 7	2	2	0.902322	0.959078	0.975814	1189874	680953	667436	885651	581840	980390	732280	1039628	13.5	22.54		3.63003	0.0761598	0.966288	no	down
COMMD8	COMM domain-containing protein 8	1	1	0.0383316	0.180586	2.73171	310000	903190	1488300	374484	1467433	1591500	2196200	1694200	6.6	21.09
COMMD9	COMM domain-containing protein 9	6	6	0.758381	0.885152	0.941803	10246000	11098010	14037000	19482990	11646000	10831010	10927000	17750990	39.4	21.819		11.6257	-0.302038	0.720811	no	up
COMT	Catechol O-methyltransferase	4	4	0.965314	0.98735	1.00677	7733400	8690503	8238801	9236202	8456399	9480005	5759598	11379000	19.9	30.037		23.0914	0.0878545	0.903122	no	down
COPA	Coatomer subunit alpha;Xenin;Proxenin	48	48	0.229224	0.475235	0.908195	517970100	534160000	504199700	581440000	407330200	518020100	476089700	549309800	41.6	138.34		188.245	0.127043	0.622362	no	down
COPB1	Coatomer subunit beta	39	39	0.282387	0.535515	0.85459	403529900	477569900	448890100	477720200	270160100	398519700	415270100	493009700	46.9	107.14		139.87	0.0328668	0.930875	no	down
COPB2	Coatomer subunit beta	31	31	0.562481	0.77206	0.941638	226050100	249299800	241180000	312620100	199669900	254510000	238970000	275080100	39.6	102.49		154.678	0.111282	0.694791	no	down
COPE	Coatomer subunit epsilon	11	11	0.707772	0.859947	0.885045	54534020	168130100	122680000	154119900	61933000	127610000	101720100	132310000	54.5	34.482		118.639	0.325474	0.212731	no	down
COPG1	Coatomer subunit gamma-1	29	7	0.773445	0.89413	1.0589	51608970	65754960	33358000	36498020	54542020	37872980	42104990	59724970	41.5	97.717		114.581	-0.124533	0.70488	no	up
COPG2	Coatomer subunit gamma-2	23	21	0.0841445	0.268213	1.15797	145350000	140020000	121320000	126550000	157910000	162700000	130310000	167810100	28.9	97.621		98.3725	0.386343	0.130668	no	down
COPRS	Coordinator of PRMT5 and differentiation stimulator	3	3	0.181818	0.416149	1.37842	459121	925112	964890	798610	1266044	738216	1012755	1248300	25	20.066		23.1306	0.340894	0.548732	no	down
COPS2	COP9 signalosome complex subunit 2	21	21	0.0366092	0.17761	0.75431	129129900	158690000	145090000	163409900	103600100	108619900	96030970	145550000	48.8	51.596		48.7124	-0.14856	0.783561	no	up
COPS3	COP9 signalosome complex subunit 3	8	8	0.068841	0.237196	0.755268	39739020	34062000	52206970	48726980	41100000	31297000	30883010	28204990	28.6	47.873		64.8952	-0.00186455	0.997738	no	up
COPS4	COP9 signalosome complex subunit 4	19	19	0.240692	0.487431	0.88988	83851040	109090000	99824020	120400000	90984020	87753970	83403050	103530000	56.4	46.268		39.2381	0.0805632	0.883749	no	down
COPS5	COP9 signalosome complex subunit 5	17	17	0.0867838	0.272133	0.7669	90385040	105010100	111510000	132460000	65631980	91123060	76872020	105479900	63.8	37.578		51.0213	-0.0962138	0.835851	no	up
COPS6	COP9 signalosome complex subunit 6	8	8	0.29951	0.547865	0.807647	59793000	92695980	73958030	69889980	40269000	59990000	56137970	89885980	29.4	36.163		62.0784	-0.0251722	0.956843	no	up
COPS7A	COP9 signalosome complex subunit 7a	8	8	0.883068	0.950404	1.02375	8035901	10242000	10418000	13325010	7755198	10775000	11317000	13271000	34.2	30.276		22.2331	-0.518253	0.311554	no	up
COPS7B	COP9 signalosome complex subunit 7b	7	7	0.0889111	0.276262	0.791995	59544980	78335950	71318000	65059980	60481990	48711980	43316980	66725000	34.5	29.622		34.3832	-0.429759	0.28462	no	up
COPS8	COP9 signalosome complex subunit 8	7	7	0.357226	0.605037	0.880714	52805970	65943000	57490000	89010060	48506970	59401010	59929990	62084000	53.6	23.225		23.9707	-0.0349366	0.962483	no	up
COPZ1	Coatomer subunit zeta-1	6	6	0.615316	0.804572	0.951554	130050000	112650000	96276950	111760000	121060000	117440000	102229900	88917960	35	20.198		16.9282	0.16838	0.822681	no	down
COQ5	2-methoxy-6-polyprenyl-1,4-benzoquinol methylase, mitochondrial	9	9	0.0302303	0.160905	0.508001	28816990	39874010	47818970	35149980	10346000	21761010	20067000	28470010	32.7	37.14		31.5961	-0.254892	0.625573	no	up
COQ6	Ubiquinone biosynthesis monooxygenase COQ6, mitochondrial	8	8	0.108246	0.3061	0.645808	62387040	41272990	45127020	50320020	37495980	49223990	30796980	17893000	17.3	50.869		8.58602	-0.170656	0.878636	no	up
COQ7	5-demethoxyubiquinone hydroxylase, mitochondrial	2	2	0.599941	0.796274	0.736777	452854	2822998	3843002	4107501	1104236	1482501	1392399	2608800	13.4	24.277		10.9516	-0.981027	0.133482	no	up
COQ9	Ubiquinone biosynthesis protein COQ9, mitochondrial	6	6	0.193873	0.431406	0.805005	10120000	7744696	14811000	12488990	9217197	7937797	8391902	9915898	31.8	35.509		19.3417	0.46716	0.404981	no	down
CORO1A	Coronin-1A	5	5	0.288148	0.539336	0.641564	20489990	8331301	3768902	6482302	7880204	4474202	4274999	4687803	15.4	51.026		6.80023	0.691545	0.492419	no	down
CORO1B	Coronin-1B	15	6	0.137544	0.351329	0.773899	72191980	80837980	75907950	80569960	43945020	57156020	57078020	89302020	37.8	54.234		96.7246	0.423829	0.131416	no	down
CORO1C	Coronin-1C	19	4	0.44081	0.675573	0.820112	21679000	21896010	27724000	14440000	27979990	12781010	19939010	12056010	39.7	53.248		100.727	0.0131864	0.972896	no	down
CORO2A	Coronin-2A	11	11	0.0215361	0.136378	0.692756	24711020	26748000	25918000	28940010	13983010	22593990	16591010	21784010	23.6	59.763		41.332	0.228841	0.631246	no	down
CORO2B	Coronin-2B	3	3	0.000127528	0.0157714	1.78989	539280	499690	544010	635010	1078900	894650	942910	1049799	7.7	54.953
CORO7	Coronin-7	12	12	0.108272	0.306015	0.793218	40581980	40840980	28465000	35939990	30315010	32812000	22011010	30659020	22.2	100.6
COTL1	Coactosin-like protein	6	4	0.180006	0.413922	0.711343	43854020	29691990	39070020	32789010	31751020	36536980	14285000	25773020	26.8	15.945		48.6319	0.114134	0.802036	no	down
COX10	Protoheme IX farnesyltransferase, mitochondrial	4	4	0.761418	0.886435	1.24701	2118400	4638097	2861499	211486	1430500	2219901	1923901	2353400	14	48.91		26.1073	-1.14087	0.00436565	yes	up
COX11	Cytochrome c oxidase assembly protein COX11, mitochondrial	2	2	0.650527	0.826226	1.0806	1443099	1921801	2281700	2018901	2261999	1918201	1472799	2725901	12.3	31.43		40.5074	0.272005	0.514299	no	down
COX15	Cytochrome c oxidase assembly protein COX15 homolog	7	4	0.310106	0.55903	0.847996	16177000	21552000	16829000	20366000	14601010	16332010	11751000	22051000	23.2	46.03		18.9273	0.0590397	0.93796	no	down
COX16	Cytochrome c oxidase assembly protein COX16 homolog, mitochondrial	3	3	0.288448	0.539429	0.750363	3584599	6526899	5062403	6138796	6959999	2685800	3829799	3219698	29.2	12.293
COX17	Cytochrome c oxidase copper chaperone	1	1	0.556476	0.767546	0.90319	29279990	37511990	43137980	34552980	48211020	26558990	26211000	32460990	25.4	6.9151		20.6646	-0.164092	0.85002	no	up
COX18	Mitochondrial inner membrane protein COX18	5	5	0.387891	0.627572	1.07373	10559000	10212000	9240905	9107801	12365000	10443000	10496990	8899500	18	37.062		23.4425	-0.478534	0.389275	no	up
COX20	Cytochrome c oxidase protein 20 homolog	2	2	0.706316	0.859661	0.877022	12502000	8447303	14498000	13412000	23154000	6705699	6149600	12724000	21.2	13.291		13.1457	-0.306849	0.725438	no	up
COX4I1	Cytochrome c oxidase subunit 4 isoform 1, mitochondrial	11	11	0.248862	0.498094	0.827862	380520000	445319800	654350400	501860100	531460000	369869800	375739900	353890000	52.7	19.576		247.038	-0.34422	0.0514055	no	up
COX5A	Cytochrome c oxidase subunit 5A, mitochondrial	11	4	0.372141	0.61505	2.178	11569000	13751010	11894000	665941	26714990	11520990	17215000	5351497	52.7	16.762		95.6129	-0.287372	0.272021	no	up
COX5B	Cytochrome c oxidase subunit 5B, mitochondrial	5	5	0.378064	0.619458	1.19973	150660000	280270100	308730100	217120100	353069800	213230000	291849900	266879900	40.3	13.696		137.197	-0.381607	0.113841	no	up
COX6B1	Cytochrome c oxidase subunit 6B1	4	3	0.691487	0.850395	1.40931	445707	9217100	14369010	6611603	8921104	3125801	9477700	5825304	36	10.192		99.3132	-0.240735	0.386276	no	up
COX6C	Cytochrome c oxidase subunit 6C	2	2	0.0569492	0.214852	7.28957	792092	521186	1439500	20196010	11523000	22541000	14588000	8943696	26.7	8.7813		60.0455	-0.644601	0.0227534	no	up
COX7A2	Cytochrome c oxidase subunit 7A2, mitochondrial	2	2	0.820166	0.92053	1.04644	35622010	45294980	58691040	38676000	67718030	33585990	50684970	38097000	27.7	9.3959		94.1747	-0.0237699	0.956789	no	up
COX7A2L	Cytochrome c oxidase subunit 7A-related protein, mitochondrial	4	4	0.0171733	0.120912	0.574156	46365030	69456960	72127970	52378980	25371990	29087000	43561970	41127010	54.4	12.615		33.1568	-0.0175207	0.976391	no	up
COX7C	Cytochrome c oxidase subunit 7C, mitochondrial	2	2	0.351324	0.599517	2.36968	16146000	18027010	28729010	710682	27568990	16698000	19056990	21359990	28.6	7.3325		127.155	-0.16812	0.575722	no	up
CPD	Carboxypeptidase D	32	32	0.121423	0.33039	1.11379	162110000	149180000	148520000	140920000	192139900	167000000	162470000	149410000	28.2	152.93		115.858	0.280223	0.313749	no	down
CPEB4	Cytoplasmic polyadenylation element-binding protein 4	2	1	0.824393	0.922957	0.910203	528586	1135700	824930	1128899	2052505	469320	427488	931810	2.9	80.121		17.1194	-0.986665	0.0534908	no	up
CPNE1	Copine-1	8	3	0.411528	0.651191	0.90017	14327990	19631010	16725990	23706000	14421000	16998990	16268990	18361010	17.5	59.058		71.4931	0.248559	0.508156	no	down
CPNE2	Copine-2	8	7	0.0358717	0.176389	1.41571	3040400	2210500	2061501	2181799	3303499	2721198	4283100	3153699	18.4	61.189		14.3616	1.13775	0.0373496	yes	down
CPNE3	Copine-3	11	5	0.0600279	0.220662	0.784387	35188990	29618000	24115010	25573000	21955000	19820000	26498000	21101010	20.3	60.13		24.6177	0.466243	0.348408	no	down
CPNE8	Copine-8	10	8	0.825765	0.923378	1.03013	2647800	2719601	2949102	2050400	3128802	3080598	2514900	2022799	24.6	63.107
CPOX	Oxygen-dependent coproporphyrinogen-III oxidase, mitochondrial	12	12	0.0286975	0.158498	0.757996	80475000	77473980	87668040	95918040	75855980	64805020	51068970	68939980	34.4	50.151		25.662	-0.470421	0.317676	no	up
CPPED1	Serine/threonine-protein phosphatase CPPED1	4	4	0.0035901	0.0581854	0.746058	6034199	5212201	4997903	5458098	3705801	4562199	3762300	4178801	13.4	35.548		12.6456	-0.168071	0.85164	no	up
CPS1	Carbamoyl-phosphate synthase [ammonia], mitochondrial	26	23	0.00644666	0.0723388	0.279518	13798010	15756990	17024000	11112000	1688101	6677901	4815598	4624798	23.5	164.94		11.3212	-0.556888	0.44624	no	up
CPSF1	Cleavage and polyadenylation specificity factor subunit 1	47	47	0.683641	0.844274	1.02151	249809900	252770000	261490100	243440100	264190100	241920000	290600100	235650100	37.9	160.88		245.501	0.239237	0.361293	no	down
CPSF2	Cleavage and polyadenylation specificity factor subunit 2	24	24	0.238082	0.484532	1.15037	150380000	170999900	213120100	135190100	214070000	179900100	190209900	177130100	36.7	88.486		107.504	-0.103999	0.773731	no	up
CPSF3	Cleavage and polyadenylation specificity factor subunit 3	18	18	0.00550482	0.0661919	1.28927	107050000	120690000	112519900	98228010	127650000	156489900	140070000	141010000	29.5	77.485		97.4028	0.643522	0.0026597	no	down
CPSF3L	Integrator complex subunit 11	9	9	0.983164	0.993697	1.00734	15092000	24595990	28126010	23228990	9027506	27630000	31482000	31801010	19.2	67.662
CPSF4	Cleavage and polyadenylation specificity factor subunit 4	6	6	0.61256	0.803276	0.949355	60398970	62924970	70151030	64799020	49484990	57702000	76699040	64078970	32.7	30.255		42.4259	0.232843	0.645227	no	down
CPSF6	Cleavage and polyadenylation specificity factor subunit 6	18	18	0.127817	0.341043	0.821511	308779900	252869900	378169900	329680100	223950000	242800200	258189900	315820100	33.8	59.209		197.83	-0.130809	0.656856	no	up
CPSF7	Cleavage and polyadenylation specificity factor subunit 7	17	17	0.464099	0.695274	0.952408	133240000	115270000	133460100	136600100	127340000	138000000	119660000	109560000	37.2	52.049		70.6981	-0.230048	0.523813	no	up
CPT1A	Carnitine O-palmitoyltransferase 1, liver isoform	24	20	0.00451233	0.0591685	0.527567	75127020	72370970	97377980	103700000	34120010	42126980	55690000	53133010	34.7	88.367		35.3572	-1.28737	3.6751e-05	yes	up
CPT2	Carnitine O-palmitoyltransferase 2, mitochondrial	25	25	0.451704	0.685299	0.919384	144489900	155029900	146280000	147399900	185410100	124450000	125769900	118910000	43.5	73.776		63.0793	0.182872	0.664842	no	down
CPVL	Probable serine carboxypeptidase CPVL	12	12	0.944622	0.97994	0.992078	104780000	101110000	94276980	94055010	131730000	97135990	80857970	87953980	27.3	54.163		35.4789	-0.120076	0.825264	no	up
CPXM1	Probable carboxypeptidase X1	2	1	0.528066	0.747273	1.2713	1404680	743541	532655	328160	831658	1333200	809272	531470	2.9	81.667		67.0831	1.27434	3.42394e-08	yes	down
CRABP1	Cellular retinoic acid-binding protein 1	10	9	0.080435	0.261671	0.796444	624780000	701560400	545350200	794409500	597749800	510550000	433490000	577560300	69.3	15.565		145.077	-0.0254988	0.94385	no	up
CRABP2	Cellular retinoic acid-binding protein 2	8	7	0.00525675	0.0649239	1.45774	20653990	18266000	17155000	17960000	31859000	29643000	22892990	24277990	52.2	15.693		11.9467	1.74939	0.00276932	yes	down
CRAT	Carnitine O-acetyltransferase	9	7	0.382851	0.623831	1.82103	4792803	3626398	2440802	416616	7216698	5094503	1616700	3269902	16.5	70.857		11.8332	0.847753	0.193258	no	down
CRBN	Protein cereblon	3	3	0.970821	0.987901	0.992241	1473000	1260599	859811	847180	1001989	840924	939950	1655400	9.7	50.545		21.6704	0.0560119	0.938382	no	down
CREB1	Cyclic AMP-responsive element-binding protein 1	5	3	0.320694	0.570775	1.1508	37694000	22731000	34308000	32419000	29591000	37325980	40642970	37232980	18.3	35.122		27.5095	0.0193348	0.977355	no	down
CREB3L4	Cyclic AMP-responsive element-binding protein 3-like protein 4;Processed cyclic AMP-responsive element-binding protein 3-like protein 4	1	1	0.663668	0.832749	1.24964	1629093	1094300	211282	957790	814650	1124300	1528301	628490	4.3	43.432		23.3563	0.473601	0.341562	no	down
CREBBP	CREB-binding protein	32	23	0.44746	0.680312	0.858524	18389000	17169000	19310990	20088000	9449798	16600000	19810990	21410010	19.4	265.35		270.764	-0.58427	0.000166998	no	up
CRELD1	Cysteine-rich with EGF-like domain protein 1	2	2	0.879007	0.947768	0.93765	1543100	927000	1098501	1075100	1953000	1660701	1161299	346695	5.7	45.439		9.92705	-0.0490115	0.963367	no	up
CRELD2	Cysteine-rich with EGF-like domain protein 2	4	4	0.142504	0.358686	0.812474	7258101	9290701	7945903	8185503	8399395	5439203	7624903	5486298	9.6	38.191		22.2021	-0.123915	0.86241	no	up
CREM	cAMP-responsive element modulator	3	3	0.708439	0.859896	1.20964	350484	2253299	1870800	1774299	899518	1288300	2145500	2257399	15.7	37.005		8.20726	-1.26813	0.0943524	no	up
CRIP2	Cysteine-rich protein 2	2	2	0.216986	0.460203	0.349852	2396300	2589300	4499698	7686298	313745	543059	2805400	6725800	23.1	22.492
CRIPT	Cysteine-rich PDZ-binding protein	2	2	0.394506	0.634013	0.67099	4881603	4931597	6801997	7308702	3921798	1233287	8866405	5657100	11.9	11.216		4.0155	-0.358418	0.809873	no	up
CRK	Adapter molecule crk	14	14	0.267879	0.521386	1.05577	59471970	56965990	54724980	55121000	62928960	55130990	56382980	64909970	50.3	33.83		38.9121	-0.358937	0.396625	no	up
CRKL	Crk-like protein	16	16	0.267424	0.521267	1.1647	122700000	143229900	85625980	100359900	115870000	141949900	119780000	141060000	59.4	33.777		74.4804	-0.130194	0.728961	no	up
CRLF3	Cytokine receptor-like factor 3	7	7	0.869439	0.945073	0.976851	9347103	7010403	5513398	8604200	8441397	7960002	6350003	6633798	18.6	49.765		24.6642	0.0882092	0.90133	no	down
CRMP1	Dihydropyrimidinase-related protein 1	31	25	0.126996	0.338568	0.872618	299579800	278760200	250010100	348859900	245980100	278179900	240220000	256930000	69.1	62.183		166.912	-0.242386	0.297382	no	up
CRNKL1	Crooked neck-like protein 1	30	8	0.612833	0.803413	1.07344	23678000	21175990	33618020	33479010	32995000	26698010	26435010	32176980	31.8	100.45		57.3602	0.178993	0.652963	no	down
CROCC	Rootletin	51	50	0.0454387	0.195505	1.25975	137700000	129630100	152100000	137779900	221460000	169759900	170679900	146820000	27.2	228.52		104.762	0.462255	0.116202	no	down
CRTAP	Cartilage-associated protein	15	8	0.480498	0.708417	0.924815	43413010	45231970	43803030	34769000	32805010	35627000	48606980	38509000	38.4	46.561		156.603	0.519172	0.00887495	no	down
CRTC1	CREB-regulated transcription coactivator 1	7	7	0.784498	0.901071	1.06123	4294599	2587900	6085199	5232203	4061402	5982400	4574599	4038000	16.4	67.299		17.8639	-0.166072	0.828375	no	up
CRY2	Cryptochrome-2	4	3	0.0535296	0.207642	1.7375	466152	1161258	630470	561190	998696	991648	1633328	1079099	11.5	66.946		20.0247	0.0111921	0.989438	no	down
CRYBB1	Beta-crystallin B1	3	3	0.407775	0.646843	0.791574	1549800	645136	1345302	1504699	1223928	1033018	1067047	589001	13.5	28.023		2.98222	-1.89808	0.165641	no	up
CRYBG3	Very large A-kinase anchor protein	4	4	0.180543	0.414388	1.84138	1181000	463044	253324	1149501	1518872	1470999	829450	987889	2.2	330.63		43.143	0.183732	0.706765	no	down
CRYM	Ketimine reductase mu-crystallin	7	7	0.0547275	0.210246	1.40608	5873397	5783198	4688801	5613100	6604998	9191898	5727403	10049010	32.8	33.775		11.098	1.65769	0.00473992	yes	down
CRYZ	Quinone oxidoreductase	12	12	0.883336	0.949948	0.978983	33765010	54705010	50425970	34690990	39973980	49589980	39549020	37858010	51.4	35.206		10.3234	-0.613074	0.44587	no	up
CRYZL1	Quinone oxidoreductase-like protein 1	3	3	0.885337	0.950892	0.960805	5420997	2652899	4470299	4564703	5210004	2481299	3098100	6244200	15.2	38.696		6.16429	-0.305284	0.801569	no	up
CS	Citrate synthase, mitochondrial	17	7	0.287387	0.538655	0.914624	554810000	517040400	522689900	439199900	527040000	435350200	491980300	408240200	38.2	51.712		180.844	-0.46981	0.0127965	no	up
CSDE1	Cold shock domain-containing protein E1	47	47	0.000759563	0.0366957	0.737761	640400100	599269800	539599900	525460000	407679800	432739900	420050200	435010200	55.4	88.884		611.31	0.0517716	0.851512	no	down
CSE1L	Exportin-2	48	48	0.343341	0.591714	0.95561	2476501000	2536300000	2490600000	2867099000	2405800000	2394301000	2418301000	2685100000	51.1	110.42		480.466	0.0566876	0.851927	no	down
CSK	Tyrosine-protein kinase CSK	11	11	0.00372696	0.0578077	1.65453	21569990	21312010	19826000	24654010	40589010	43479000	27770000	34358020	25.6	50.704		55.0609	0.128592	0.768665	no	down
CSNK1A1	Casein kinase I isoform alpha	9	9	0.00221968	0.0488507	0.658203	77777040	96346980	97261020	84835980	51794000	53349030	66800020	62873000	35.6	38.914		92.6619	-0.0225208	0.958408	no	up
CSNK1D	Casein kinase I isoform delta	12	4	0.99549	0.998328	0.998201	3133401	8435295	10363010	7431196	6648602	4359799	8888000	7843897	34.5	47.316		71.0395	-0.518805	0.0584768	no	up
CSNK1E	Casein kinase I isoform epsilon	13	5	0.851119	0.934368	0.970886	23769010	12868000	17154000	13906990	17777010	17705000	13888000	14832010	36.8	47.315
CSNK1G2	Casein kinase I isoform gamma-2	7	1	0.00332225	0.0576774	2.17483	1449700	1433601	1623301	877880	2278300	3581998	2906701	2793202	16.6	47.582		114.64	-0.0810471	0.837611	no	up
CSNK2A1	Casein kinase II subunit alpha;Casein kinase II subunit alpha 3	16	16	0.104585	0.299848	0.696061	167740000	232820000	301770100	267489900	118759900	143850100	199200100	217449900	45.8	45.143		25.4968	0.0253656	0.972603	no	down
CSNK2A2	Casein kinase II subunit alpha	14	14	0.0559617	0.21366	0.68269	107549900	161939900	162250000	168350100	78747040	85052050	126550000	121919900	49.7	41.213		43.1802	-0.467619	0.186191	no	up
CSNK2B	Casein kinase II subunit beta	5	5	0.331546	0.579767	0.782574	42965010	59270010	56714020	25476020	45914000	39120000	28405000	27047990	33.5	24.942
CSPG4	Chondroitin sulfate proteoglycan 4	15	6	0.917617	0.967727	0.943157	5828000	710219	539914	1064599	1434602	1035880	1323904	956887	8	250.53		20.5183	1.01161	0.0390164	yes	down
CSRP1	Cysteine and glycine-rich protein 1	6	6	0.00205557	0.0486602	0.179985	28645000	35227020	32334980	28479980	2157701	6232497	7890900	9189698	42	20.583		9.71073	-2.45214	0.0003762	yes	up
CSRP2	Cysteine and glycine-rich protein 2	8	8	0.968292	0.987895	0.993777	165730100	165980000	165540000	155429900	106060000	167370000	182850000	212679900	54.9	20.954		98.4745	0.783756	0.000267855	no	down
CSRP2BP	Cysteine-rich protein 2-binding protein	4	4	0.390941	0.630385	0.772487	1534701	1164801	1104045	1697900	1604005	587350	1633948	775173	6.1	88.843
CST1	Cystatin-SN	1	1	0.83569	0.927556	1.12558	983243	1004980	2185599	1844229	756410	3044599	4633298	599145	12.8	16.387		21.6409	2.73651	0.162993	no	down
CSTB	Cystatin-B	6	6	0.284275	0.536813	0.746931	191390000	278609800	304310200	199040000	116790000	135529900	206120100	308129900	86.7	11.139		24.6494	-0.562049	0.214058	no	up
CSTF1	Cleavage stimulation factor subunit 1	12	12	0.810462	0.916688	0.915105	36681020	58678000	100740000	46580000	28129990	39631980	102650100	61891000	36.4	48.357		70.8631	-0.315344	0.302256	no	up
CSTF2	Cleavage stimulation factor subunit 2	15	10	0.0532964	0.207374	0.7459	49024020	57578010	72304020	65048020	44832010	35178010	53037980	49129010	38	60.959		26.3646	-0.192388	0.739618	no	up
CSTF2T	Cleavage stimulation factor subunit 2 tau variant	17	12	0.237444	0.48431	1.19158	41017000	36189980	48245000	39107020	67150050	38927980	50239980	42992000	32.8	64.436		112.898	-0.248092	0.344993	no	up
CSTF3	Cleavage stimulation factor subunit 3	24	24	0.226893	0.472011	1.09667	153440100	162530000	197710100	184989900	190359900	177830000	184900000	210780000	39.6	82.921		50.504	-0.075415	0.88242	no	up
CT83	Kita-kyushu lung cancer antigen 1	3	3	0.837138	0.928665	0.942719	618578	1347900	1090200	613048	1076030	477058	1042799	822215	30.1	12.784
CTBP1	C-terminal-binding protein 1	14	12	0.987822	0.996219	0.998196	32768000	51990970	44950000	39379980	35920990	42655020	41284010	47331020	36.1	47.535		145.179	0.021041	0.959132	no	down
CTBP2	C-terminal-binding protein 2	13	11	0.0973849	0.289971	0.923835	211449900	215679900	233300000	216369900	185780100	199459900	207099900	218510100	31.9	48.956		252.633	-0.489575	0.00309208	no	up
CTC1	CST complex subunit CTC1	3	3	0.00624531	0.0702708	2.16233	626557	525625	584170	486390	1276488	1051152	1888057	807510	4.5	134.61		34.4793	0.204989	0.7057	no	down
CTCF	Transcriptional repressor CTCF	13	12	0.121444	0.330286	1.74122	37258980	37292980	26435990	10635010	52874010	46354980	40719020	35981020	22.7	82.785		119.118	-0.506333	0.025298	no	up
CTDNEP1	CTD nuclear envelope phosphatase 1	4	4	0.90866	0.963165	0.9472	3371902	2558501	1454300	1780199	692457	2729200	4961202	1917499	21.7	28.377		37.9382	-0.117225	0.832997	no	up
CTDP1	RNA polymerase II subunit A C-terminal domain phosphatase	19	17	0.912236	0.964345	0.988682	24765990	22745010	20393990	19418010	25608020	19689990	17865010	23662000	29.9	104.4		10.0888	-0.31252	0.741162	no	up
CTDSPL2	CTD small phosphatase-like protein 2	13	13	0.00466475	0.0596796	1.39802	26110010	23900980	30559990	24875000	41682010	36706000	37053990	31964980	33.7	52.998		27.7106	0.10952	0.892566	no	down
CTGF	Connective tissue growth factor	2	2	0.0496103	0.201549	0.0993622	29172990	28328980	23280000	732419	2335877	693844	792232	1069734	6.3	38.091
CTH	Cystathionine gamma-lyase	9	9	0.844671	0.931687	0.970834	20856000	28842990	19783010	23265010	28394000	26102000	17563000	18895000	26.4	44.508		12.5598	0.104757	0.909996	no	down
CTHRC1	Collagen triple helix repeat-containing protein 1	4	4	0.174634	0.406358	0.531094	2887599	2420000	2407201	1063100	538344	1379299	2562743	747656	16.5	26.224
CTIF	CBP80/20-dependent translation initiation factor	4	4	0.763991	0.887852	1.12814	1203500	823786	332357	1282700	1518729	780798	531961	1085299	7.5	67.586		14.5283	0.114442	0.905792	no	down
CTNNA1	Catenin alpha-1	50	38	0.395693	0.634954	1.06601	657260100	796380200	859029800	765809900	814780000	797529700	913410000	749180300	65.1	100.07		493.31	0.289589	0.0920272	no	down
CTNNAL1	Alpha-catulin	11	11	0.47671	0.705709	0.873401	18891000	15951000	11985000	11853000	9962006	18653000	11156000	12016000	18.3	81.895		62.2045	0.598421	0.0422432	no	down
CTNNB1	Catenin beta-1	32	29	0.776309	0.895618	1.01464	327510100	351350100	375540200	309800100	321649900	352179800	345930200	362089800	52.4	85.496		751.081	0.124053	0.47665	no	down
CTNNBL1	Beta-catenin-like protein 1	21	21	0.343017	0.591373	1.06484	134680100	126710100	146950000	142110100	134150000	137070100	168660000	147740000	29.3	65.173		35.4881	0.0974995	0.863894	no	down
CTNND1	Catenin delta-1	43	16	0.851642	0.934583	1.02361	28097980	43798970	45344000	42445980	37759980	38727980	45381000	39183000	55.4	108.17		277.596	-0.186097	0.373846	no	up
CTPS1	CTP synthase 1	19	17	0.961062	0.985727	1.00553	160490000	238210100	218480100	226600100	199350000	200460000	192380100	251679900	42.3	66.69		71.6977	-0.00652717	0.989438	no	up
CTPS2	CTP synthase 2	24	14	0.233651	0.478836	1.17976	72244970	86467000	80954980	75208010	84974050	92421020	73219990	128130000	50	65.677		57.6531	0.254853	0.482434	no	down
CTR9	RNA polymerase-associated protein CTR9 homolog	26	26	0.10768	0.305169	0.802324	97491980	156320000	139360000	125500000	90133970	103690000	119440000	98943950	23.8	133.5		93.5592	-0.275204	0.411361	no	up
CTSA	Lysosomal protective protein;Lysosomal protective protein 32 kDa chain;Lysosomal protective protein 20 kDa chain	5	5	0.221794	0.464886	0.544095	12327000	14967000	18295010	24049990	2905802	10665000	10289000	22311990	11	54.465		33.1566	-1.00397	0.00355099	yes	up
CTSB	Cathepsin B;Cathepsin B light chain;Cathepsin B heavy chain	5	5	0.183708	0.418082	0.586359	1877299	2911401	2946300	2305601	952844	708523	2173999	2990298	21.8	37.821		39.4939	-0.288714	0.517006	no	up
CTSC	Dipeptidyl peptidase 1;Dipeptidyl peptidase 1 exclusion domain chain;Dipeptidyl peptidase 1 heavy chain;Dipeptidyl peptidase 1 light chain	9	9	0.560297	0.770328	0.839954	42021020	31430020	101970000	65096970	42133000	36599010	44476030	63628010	21.2	51.853		342.347	0.451768	0.00199028	no	down
CTSD	Cathepsin D;Cathepsin D light chain;Cathepsin D heavy chain	16	15	0.163321	0.390113	0.839371	884379800	794289800	1129201000	1134900000	976350200	736689700	751029800	827209900	40.5	44.552		25.8423	-0.470022	0.322381	no	up
CTSH	Pro-cathepsin H;Cathepsin H mini chain;Cathepsin H;Cathepsin H heavy chain;Cathepsin H light chain	1	1	0.410576	0.650332	1.27893	884640	681764	1528301	1603901	1937726	1616437	832852	1516200	3.9	37.393		7.783	1.32316	0.0801815	no	down
CTSK	Cathepsin K	6	5	0.120211	0.328594	1.43892	12198010	14678000	16034000	7560599	15510990	24315000	16067000	15355010	19.5	36.966		31.1564	0.478921	0.251363	no	down
CTSL	Cathepsin L1;Cathepsin L1 heavy chain;Cathepsin L1 light chain	3	2	0.00529501	0.0645714	0.481523	7220602	8625795	14243000	9581804	3616899	4429003	5262700	5420503	9.9	37.564		16.614	-0.918448	0.0682263	no	up
CTSV	Cathepsin L2	9	8	0.742375	0.878779	1.07212	9173699	6141102	7991499	6150901	9416998	4935700	11011990	7148197	29.6	37.329		46.6466	0.773584	0.0102115	no	down
CTSZ	Cathepsin Z	4	4	0.81824	0.919791	1.26746	688372	18186990	2567300	4684699	673067	20622010	7098500	3943901	12.7	33.996		21.1703	0.484984	0.380718	no	down
CTTN	Src substrate cortactin	32	9	0.0445957	0.194757	0.838991	129060000	155390100	135190100	116300000	120500000	109040100	102840000	115619900	58.5	61.585		134.345	-0.474079	0.028291	no	up
CTTNBP2	Cortactin-binding protein 2	13	13	0.15112	0.371562	0.796709	6827296	4222803	6939299	4500299	4102801	4533699	4076702	4783700	8.7	181.05		49.5576	0.424151	0.224085	no	down
CTTNBP2NL	CTTNBP2 N-terminal-like protein	22	9	0.903639	0.960204	0.979354	27759980	17434010	16283990	14375010	22439990	15352000	16688990	18127000	41.6	70.157		42.6247	-0.020418	0.970551	no	up
CTU1	Cytoplasmic tRNA 2-thiolation protein 1	6	6	0.822053	0.921745	1.10257	5882403	12112990	2654200	7766402	4217798	14564990	5619203	6288098	23.9	36.45		27.6394	0.0345353	0.963367	no	down
CTU2	Cytoplasmic tRNA 2-thiolation protein 2	8	8	0.531116	0.74918	1.07798	11706000	8170896	11555000	11084000	9092005	11956010	12110000	12566010	18.4	56.107		26.1977	0.207835	0.737721	no	down
CUEDC2	CUE domain-containing protein 2	4	4	0.719548	0.86705	1.0564	2628600	3884202	3640198	4993300	4417202	3315702	4130302	3820701	22.6	32.009		25.1719	0.615013	0.168895	no	down
CUL1	Cullin-1	29	29	0.955804	0.98475	0.992223	122719900	177349900	159509900	181780000	131710000	147550000	149700000	210250100	41.1	89.69		103.006	-0.254536	0.432495	no	up
CUL2	Cullin-2	22	22	0.500716	0.726455	0.921204	46357000	62525020	61423030	73305040	50622020	55664020	50405980	66169980	31.5	86.982		45.2084	-0.103524	0.838483	no	up
CUL3	Cullin-3	29	29	0.27197	0.52548	0.91286	122150000	141010000	133259900	150810100	134860000	115080100	109730000	141150100	40.1	88.929		105.839	-0.296061	0.331869	no	up
CUL4A	Cullin-4A	33	13	0.245367	0.494377	0.907392	48123010	61751000	64886030	56401020	51287990	47286980	54212980	56072990	44.7	87.679		117.944	0.0198493	0.957869	no	down
CUL4B	Cullin-4B	32	24	0.0186641	0.126705	0.813016	93263030	82326050	102350000	90273980	84374020	68797020	70079010	76195010	38.8	103.98		51.3852	-0.0909403	0.855491	no	up
CUL5	Cullin-5	21	21	0.0808938	0.262514	1.19793	20666010	27823990	25523010	27252020	31924980	29824020	26074000	33176010	27.4	90.954		30.3968	-0.0866238	0.889695	no	up
CUL7	Cullin-7	10	9	0.863222	0.94124	0.966161	2288900	2904500	2824802	2439002	1862994	3382001	3513502	1802899	9.4	191.16		68.2569	0.733819	0.0358497	no	down
CUTA	Protein CutA	2	2	0.553954	0.76593	1.03397	42858980	39087020	46918020	45198970	45800020	40553980	45616010	47923970	22.9	19.116		13.3633	0.84681	0.191567	no	down
CUTC	Copper homeostasis protein cutC homolog	3	3	0.656232	0.829274	1.16346	20874010	6147698	16511010	9818997	8566403	15244000	15070010	19371010	12.1	29.341		12.0096	-0.503981	0.499679	no	up
CUX1	Protein CASP	27	9	0.315146	0.564292	2.38399	12835010	435448	8846103	7071000	7119798	14461000	8555900	12819000	47.2	77.454		32.7039	0.207167	0.706685	no	down
CUX1	Homeobox protein cut-like 1	25	6	0.679002	0.841376	0.80864	1018099	867910	1510527	448995	1781400	768640	799950	233942	20.2	164.19		32.7039	0.207167	0.706685	no	down
CWC15	Spliceosome-associated protein CWC15 homolog	9	9	0.582077	0.785189	1.05552	77063020	70045020	91026010	74068020	102010000	75904040	74167970	78662030	37.1	26.624		31.8185	-0.453537	0.30453	no	up
CWC22	Pre-mRNA-splicing factor CWC22 homolog	29	29	0.623381	0.807361	0.957211	60304020	69083040	69339980	65333040	78280980	55148990	63694000	57619970	26.9	105.47		51.4006	-0.0847059	0.865846	no	up
CWC25	Pre-mRNA-splicing factor CWC25 homolog	10	1	0.471558	0.701633	0.83607	1240202	1858900	1952099	1094600	765589	1196271	1808399	1453300	28.2	49.647
CWC27	Peptidyl-prolyl cis-trans isomerase CWC27 homolog	13	13	0.605219	0.799003	0.943902	61075000	64724020	43052010	55155990	44602980	57848040	54314990	53168000	43.2	53.846		31.0611	-0.225064	0.722854	no	up
CWF19L1	CWF19-like protein 1	11	11	0.102839	0.296897	0.73257	22184010	21338990	29806000	30367000	16943010	19250990	14238000	26571980	17.5	60.618		27.0177	-0.856789	0.0286283	no	up
CWF19L2	CWF19-like protein 2	13	9	0.657443	0.830731	0.929609	7025499	4701700	8102202	9596498	6547304	6166697	6484899	7325399	15.4	103.79		25.834	-0.29943	0.614932	no	up
CXADR	Coxsackievirus and adenovirus receptor	11	11	0.0319762	0.165532	0.832652	188430100	213999900	181129900	193239900	185050100	167370000	143600000	152540000	43	40.029		123.754	-0.376384	0.115132	no	up
CXORF38	Uncharacterized protein CXorf38	5	5	0.0560649	0.21325	0.303583	4017600	5060703	6220297	7981405	1325955	3405399	3900298	486835	18.5	36.67		10.0211	-0.305352	0.751869	no	up
CXORF56	UPF0428 protein CXorf56;UPF0428 protein CXorf56 homolog	7	7	0.759618	0.885651	0.956336	6169502	4697003	3722801	3540599	3660598	4613098	4662098	4058198	32	25.624		9.20416	-0.141192	0.892862	no	up
CXXC1	CXXC-type zinc finger protein 1	8	8	0.00312706	0.057573	1.67097	8201297	8309202	11724000	10352000	13591000	18408990	15524000	16600990	13	75.711		66.8461	-0.0300856	0.948957	no	up
CXXC5	CXXC-type zinc finger protein 5	4	4	0.383235	0.624229	1.16503	2207200	3252599	4616801	3689702	3550499	4145702	4291903	3566301	17.7	32.977		145.86	-0.423148	0.0443238	no	up
CYB561	Cytochrome b561	3	3	0.773324	0.89408	1.07243	1117170	1868499	2022000	2510399	1246114	2414800	1923400	2421600	14.3	27.559		17.7581	-1.08013	0.03629	yes	up
CYB561D2	Cytochrome b561 domain-containing protein 2	1	1	0.873848	0.946605	1.09464	1055561	639589	1985100	1960399	536165	727252	3683702	2626199	5.4	23.973		8.83324	0.526487	0.539858	no	down
CYB5A	Cytochrome b5	7	7	0.700963	0.856582	1.04424	349350100	344920000	434200100	287090000	398360100	300120200	384709900	388309800	56	15.33		39.9168	-0.0211524	0.971862	no	up
CYB5B	Cytochrome b5 type B	6	6	0.136436	0.350324	1.25866	47100990	41880980	50912980	41185020	82281980	48994030	50663000	50827970	59.3	16.694		40.5804	-0.0477769	0.931382	no	up
CYB5R1	NADH-cytochrome b5 reductase 1	10	8	0.0538561	0.208383	1.37733	13559000	11773010	14322990	14774990	26728980	17740010	16915010	15157000	29.8	34.094		8.55966	-0.026254	0.981034	no	up
CYB5R2	NADH-cytochrome b5 reductase 2	10	10	0.199575	0.436031	0.85042	26890010	34506010	27460990	29070000	23047990	21205990	23986010	33047000	36.6	31.458		15.2014	0.332609	0.673448	no	down
CYB5R3	NADH-cytochrome b5 reductase 3;NADH-cytochrome b5 reductase 3 membrane-bound form;NADH-cytochrome b5 reductase 3 soluble form	14	12	0.599153	0.795588	0.917519	134720000	179170000	178890000	148560100	149150000	153089900	197149900	100990000	45.2	34.234		64.1929	-0.194578	0.637965	no	up
CYBA	Cytochrome b-245 light chain	5	5	0.45454	0.687357	0.869267	13780000	16472000	17213000	12463000	8595798	17427990	15651000	11858000	25.1	21.012		58.6855	0.71929	0.0146542	no	down
CYC1	Cytochrome c1, heme protein, mitochondrial	10	6	0.959213	0.986034	1.02765	52952010	53647010	26890010	7039901	45888020	28456010	19271000	23833990	38.8	35.422		186.52	-0.296461	0.188805	no	up
CYCS	Cytochrome c	9	5	0.2022	0.439818	0.793963	291739900	255719800	323019900	229539900	228220000	143610100	242049900	277079900	57.1	11.749		126.75	-0.571297	0.0305627	no	up
CYFIP1	Cytoplasmic FMR1-interacting protein 1	37	20	0.0237094	0.144359	1.31025	45878990	47213020	47362000	46481020	51113010	67241020	54514980	75009020	31.4	145.18		55.3002	1.51399	0.234235	no	down
CYFIP2	Cytoplasmic FMR1-interacting protein 2	31	14	0.730001	0.874108	0.945688	25511000	21227990	20416010	15834010	27279020	18621000	17366010	15872990	28.4	145.66		98.3964	0.778123	0.000240077	no	down
CYP20A1	Cytochrome P450 20A1	10	8	0.873464	0.946367	0.940952	12681000	9455297	11235000	10761000	3508498	16157000	14357000	13963000	28.1	52.432		12.1314	-0.0139935	0.989438	no	up
CYP2S1	Cytochrome P450 2S1	21	21	0.147786	0.367098	0.891296	420230200	334910100	358880000	360649800	307020100	313580000	380210200	314050100	41.9	55.816		163.512	0.319458	0.152505	no	down
CYP51A1	Lanosterol 14-alpha demethylase	20	9	0.794503	0.905826	1.05447	123520000	135920000	155029900	215180100	103280000	180230000	201929900	184219900	40.6	56.805		98.6622	0.294668	0.292026	no	down
CYR61	Protein CYR61	6	6	0.0651761	0.230565	0.449577	25754010	25226990	27980990	7263803	7592101	12806010	8703300	6375196	12.9	42.026
CYTH2	Cytohesin-2	10	8	0.000184454	0.0222857	0.64882	2334800	2408401	2747501	2315100	1447251	1652800	1697301	1561201	32.8	46.546		25.9998	-0.524712	0.253467	no	up
D17WSU92E	Uncharacterized protein C6orf106 homolog;Uncharacterized protein C6orf106	4	4	0.622931	0.807335	0.814477	745177	1961301	891870	1213701	1266260	1208224	335510	1356300	19.2	32.081
D2HGDH	D-2-hydroxyglutarate dehydrogenase, mitochondrial	5	5	0.328564	0.576781	1.49044	5169003	968450	2530001	1364200	2542202	3114000	3612502	2981298	12.3	56.415		18.0002	0.488698	0.459506	no	down
DAAM1	Disheveled-associated activator of morphogenesis 1	31	29	0.00446031	0.0592203	0.606161	49871970	62593990	67007000	55501990	29379990	34531020	33814010	45688980	31.1	123.47		46.6179	-0.373616	0.327728	no	up
DAB1	Disabled homolog 1	3	3	0.0405163	0.186105	1.68942	1889400	1009500	1217700	1538801	2105701	3380999	1667801	2451999	6	63.774		14.3571	0.154636	0.857007	no	down
DAB2	Disabled homolog 2	3	1	0.563385	0.772464	1.33077	725940	284840	875560	1483966	497719	2239749	767020	985440	5.7	82.447		4.55871	0.718821	0.559636	no	down
DAB2IP	Disabled homolog 2-interacting protein	16	14	0.00830146	0.0819333	1.29119	10968000	10280000	8950698	10761000	13634010	14575010	13070000	11621990	21.4	131.62		77.6182	0.383795	0.218555	no	down
DAD1	Dolichyl-diphosphooligosaccharide--protein glycosyltransferase subunit DAD1	3	3	0.00994589	0.0906565	1.39898	103160000	96721050	125840000	104010000	174679900	142949900	159079900	125930000	28.3	12.497		43.1045	-0.263423	0.548427	no	up
DAG1	Dystroglycan;Alpha-dystroglycan;Beta-dystroglycan	22	22	0.0664908	0.233193	0.776723	132280000	137560000	138810000	88507000	92771990	93486970	104220000	90017980	32.4	97.44		281.966	-0.348848	0.0452751	no	up
DAGLB	Sn1-specific diacylglycerol lipase beta	9	9	0.0956733	0.287637	0.877387	18126000	19359000	18074000	18245010	14299000	18494010	14714000	17622990	14.6	73.731		37.9641	-0.0110077	0.985467	no	up
DAK	Bifunctional ATP-dependent dihydroxyacetone kinase/FAD-AMP lyase (cyclizing);ATP-dependent dihydroxyacetone kinase;FAD-AMP lyase (cyclizing)	19	19	0.00755351	0.0786228	1.61456	31917010	31509980	28090000	43344990	53596040	57830980	43246990	62077020	43.8	58.946
DALRD3	DALR anticodon-binding domain-containing protein 3	5	5	0.140281	0.355572	0.629775	3447500	3142200	2437300	1999999	994756	1388906	1940400	3098399	12.3	59.362		39.6725	0.188225	0.704133	no	down
DAP3	28S ribosomal protein S29, mitochondrial	15	12	0.0902481	0.277062	0.797379	102690000	154869900	149620100	151380000	126340100	102470000	113240000	99329020	37.4	45.566		52.6086	-0.319928	0.383588	no	up
DAPK1	Death-associated protein kinase 1	16	16	0.665894	0.834209	1.03752	18055990	20466000	20545000	19383000	18828000	17109990	23721010	22314000	13.8	160.04		225.549	-0.403815	0.0263642	no	up
DAPK3	Death-associated protein kinase 3	10	10	0.358016	0.605669	0.790787	33943010	29685000	62167040	28411990	28301990	21856010	44119020	25502000	28.4	52.535		72.784	-0.313611	0.300858	no	up
DARS	Aspartate--tRNA ligase, cytoplasmic	32	12	0.268534	0.522594	0.85569	222999900	312280100	301899800	275339900	228210100	196069900	219080000	316590100	67.1	57.136		97.6842	0.209041	0.505573	no	down
DARS2	Aspartate--tRNA ligase, mitochondrial	21	21	0.194273	0.431594	1.13417	112720100	97486950	105290000	82865040	111630000	128230000	113219900	97887060	36.4	73.562		46.9637	0.0551231	0.913204	no	down
DAXX	Death domain-associated protein 6	12	12	0.979881	0.992103	0.997498	32588010	38875980	43585020	37492010	31894990	35107020	41902020	43683020	25.9	81.372
DAZAP1	DAZ-associated protein 1	11	3	0.282857	0.535636	1.31973	78578050	31700980	85409020	68170040	88895040	70864980	91867940	76021040	46.9	43.383		269.641	-0.146032	0.539362	no	up
DBI	Acyl-CoA-binding protein	7	7	0.284678	0.536951	1.22594	126540000	142769900	117600000	162140000	258889900	127840000	137679900	170760000	70.1	10.044		47.5759	0.09805	0.852215	no	down
DBN1	Drebrin	37	14	0.0222895	0.139739	0.804837	397689700	481289900	460120100	516549800	397130200	351430000	404780300	337889900	63.3	71.428		537.316	-0.380363	0.037929	no	up
DBNL	Drebrin-like protein	14	14	0.491785	0.717762	1.05292	52342980	52669030	61334980	66085960	66832970	55379000	59052020	62840000	40.2	48.207		38.936	-0.572528	0.106385	no	up
DBR1	Lariat debranching enzyme	13	13	0.565342	0.773782	0.937104	13338000	12861000	13844000	15820990	14098000	16264990	12199010	10357990	27	61.554		30.979	-0.486084	0.251363	no	up
DBT	Lipoamide acyltransferase component of branched-chain alpha-keto acid dehydrogenase complex, mitochondrial	13	13	0.265016	0.518252	0.901767	59099980	57609000	59305980	69051990	52403990	66804000	47094020	55923960	36.5	53.486		19.0183	0.132856	0.856255	no	down
DCAF11	DDB1- and CUL4-associated factor 11	11	11	0.716139	0.8648	0.950603	9835406	8726805	7872405	10943000	10129000	9705102	6307798	9737399	27.1	61.669		49.0391	0.178713	0.670304	no	down
DCAF12L1	DDB1- and CUL4-associated factor 12-like protein 1	4	4	0.718487	0.866044	0.81766	601190	604110	1019516	2621742	1747250	391891	415770	1524160	8.9	51.201		5.33092	1.19329	0.213466	no	down
DCAF13	DDB1- and CUL4-associated factor 13	11	11	0.332935	0.581828	0.747322	28706000	23763010	32083020	21061990	9378804	20270990	31577000	23949000	26.5	51.402		108.926	-0.0832916	0.834014	no	up
DCAF15	DDB1- and CUL4-associated factor 15	3	3	0.811272	0.917521	1.10854	525577	1848599	2135000	2448500	912234	1723001	2025601	2409000	6.8	66.463		94.214	0.0805448	0.838702	no	down
DCAF16	DDB1- and CUL4-associated factor 16	1	1	0.728835	0.873495	0.890678	5581900	2975801	1627100	4999999	2427001	4525500	2422000	3197001	5.6	24.193		21.6743	0.0464178	0.950796	no	down
DCAF4	DDB1- and CUL4-associated factor 4	6	6	0.002261	0.0481416	0.33847	3904199	4586801	6846703	4069599	1450203	1051099	2332600	1841800	14.1	55.693		28.6208	-1.16833	0.00106302	yes	up
DCAF7	DDB1- and CUL4-associated factor 7	5	5	0.468126	0.699165	1.16242	15104990	26507000	30238000	22506990	19259010	28474000	26084000	34781000	16.4	38.926		58.9124	0.162547	0.690907	no	down
DCAF8	DDB1- and CUL4-associated factor 8	8	3	0.461837	0.694674	0.719282	2526601	2063901	1211900	1739400	1216474	500520	3343302	1445400	18.1	66.851		61.1319	-0.0492924	0.914775	no	up
DCAKD	Dephospho-CoA kinase domain-containing protein	8	8	0.131252	0.342668	1.26646	32879000	36274000	58413980	47364000	54934030	55584960	48594010	57208030	35.1	26.55		21.6145	0.389648	0.474487	no	down
DCBLD2	Discoidin, CUB and LCCL domain-containing protein 2	7	5	0.0114594	0.0962892	2.81481	1622099	2913499	2888501	3251602	9752898	3618702	10331000	7642403	15	85.034		55.04	0.731607	0.0167941	no	down
DCD	Dermcidin;Survival-promoting peptide;DCD-1	3	3	0.864008	0.942171	1.03779	14601010	21133000	18846000	23323990	12553010	21808990	19076000	30125990	22.7	11.284
DCK	Deoxycytidine kinase	7	7	0.733602	0.875866	1.0813	8661494	9803406	7760901	10119000	17205010	9043895	6214798	9426701	23.8	30.518		14.9057	-0.257875	0.733377	no	up
DCLK1	Serine/threonine-protein kinase DCLK1	12	11	0.214365	0.456574	0.681959	8546505	8353603	7170099	9657705	11542990	5342802	5564100	3116100	19.1	82.223		19.4152	-0.312604	0.642175	no	up
DCP1A	mRNA-decapping enzyme 1A	14	14	0.573362	0.778959	1.06872	19157000	28504990	19639990	18656010	22296010	25168990	23399010	19878000	38	63.278		21.4746	0.331326	0.595615	no	down
DCP1B	mRNA-decapping enzyme 1B	14	13	0.382169	0.623253	0.740719	16540000	18314000	19216000	18134000	5271801	18987000	15204990	20877990	30	67.722		25.3676	0.513837	0.276945	no	down
DCP2	m7GpppN-mRNA hydrolase	8	8	0.133974	0.346351	0.703743	14631000	16823990	16923000	19679990	6795202	14172000	12787010	16329010	21	48.423		38.7176	-0.0648343	0.911564	no	up
DCPS	m7GpppX diphosphatase	11	11	0.0474731	0.19949	0.82121	54604000	48776030	53866970	52070010	36808010	51110980	39147990	46130970	38.6	38.608		27.4812	0.12931	0.855615	no	down
DCTD	Deoxycytidylate deaminase	5	5	0.08724	0.273081	1.42925	9144396	7405304	10113010	13639990	17253000	10409010	12859010	16879000	23.6	20.016		16.9468	0.311746	0.642772	no	down
DCTN1	Dynactin subunit 1	41	41	0.710378	0.86123	0.962568	128940100	152529900	152540000	162570000	124870000	130990000	140360000	182370000	37	141.69		219.636	-0.295349	0.113109	no	up
DCTN2	Dynactin subunit 2	17	10	0.12469	0.335991	1.09997	106269900	103950000	94844050	96880000	107320000	120330000	98255020	117110000	48.1	44.23		54.1266	0.383411	0.262303	no	down
DCTN3	Dynactin subunit 3	5	5	0.287566	0.538862	0.635827	7490397	5762302	3440802	6983605	1292386	5759903	5074398	4487501	24.7	21.119		6.51508	-1.15976	0.219826	no	up
DCTN4	Dynactin subunit 4	10	10	0.67922	0.841264	0.963295	49502010	43972980	38510980	47954010	50265030	45985010	38931010	38466000	34.1	52.337		35.3989	-0.501022	0.205089	no	up
DCTN5	Dynactin subunit 5	3	3	0.347566	0.596238	1.5762	1434257	7501497	5302200	10025000	5401502	9208196	9039401	7851201	15.4	20.14		16.2761	-0.880176	0.104035	no	up
DCTN6	Dynactin subunit 6	4	4	0.404996	0.643273	0.712065	5392098	11032000	10697000	19026000	3641402	6598801	13086990	9897496	23.7	20.67		10.3105	-0.0835064	0.938021	no	up
DCTPP1	dCTP pyrophosphatase 1	9	9	0.00858115	0.083122	0.7911	76029980	71646970	75789020	59999990	55228010	59934030	53292000	55000960	57.6	18.681		80.4044	0.132702	0.743735	no	down
DCUN1D1	DCN1-like protein 1	6	6	0.432406	0.669187	0.920657	24854000	20344010	24784010	21564000	17303990	22022010	19767010	25774000	24.3	30.097		17.2636	-0.296993	0.695181	no	up
DCUN1D3	DCN1-like protein 3	3	3	0.214035	0.456548	1.22317	1524299	1540000	1919701	1124501	2149700	1395800	1983201	1906201	9.5	34.291		12.6358	0.0994323	0.917326	no	down
DCUN1D5	DCN1-like protein 5	10	5	0.111749	0.312285	0.706323	1677999	2597402	2806201	2257799	1173054	1936399	1364800	2217000	29.1	27.508		41.5135	-0.626204	0.0783869	no	up
DCX	Neuronal migration protein doublecortin	4	3	0.040982	0.186978	1.73343	2091899	997990	1408399	877200	2563200	1811500	2011200	2493701	13.4	40.573		3.82359	-0.404589	0.795405	no	up
DCXR	L-xylulose reductase	11	11	0.462807	0.695404	0.7896	47830980	37690010	30855010	28008010	52531000	33887000	24034990	14154010	52.9	25.913		30.9738	0.191071	0.725438	no	down
DDA1	DET1- and DDB1-associated protein 1	2	2	0.650938	0.826264	1.12212	1852800	2799302	1475399	2687700	3265102	1547500	1975499	3266799	27.5	11.835		6.73772	0.295035	0.801569	no	down
DDAH1	N(G),N(G)-dimethylarginine dimethylaminohydrolase 1	14	13	0.0266143	0.151093	0.568341	72289020	76677950	75955030	60686000	36083010	38701980	28144010	67826980	51.6	31.121		20.8303	-0.403391	0.504364	no	up
DDAH2	N(G),N(G)-dimethylarginine dimethylaminohydrolase 2	10	9	0.0117254	0.0981635	1.52711	50197030	37693000	32026020	31937990	60932000	60645970	48829970	58331020	56.8	29.644
DDB1	DNA damage-binding protein 1	47	47	0.359729	0.608069	0.907998	359709800	410350000	431659900	442660200	289490000	407850200	385510200	421200200	40.9	126.97		476.993	0.0207368	0.933379	no	down
DDB2	DNA damage-binding protein 2	8	8	0.197921	0.434484	1.43188	9069603	10754990	7111604	3731301	10035000	9944203	8447001	12907990	25.5	47.863		29.1421	1.14926	0.00286482	yes	down
DDHD1	Phospholipase DDHD1	3	3	0.448246	0.681317	1.48022	1224200	1839199	573233	232494	908882	1774501	998900	894186	6.9	61.822		25.2951	0.270313	0.622701	no	down
DDI2	Protein DDI1 homolog 2	11	11	0.036808	0.17771	0.86915	75862010	66532960	70120990	75861000	56421010	60981970	65294960	68199970	37.3	44.522		35.469	-0.708043	0.0501184	no	up
DDOST	Dolichyl-diphosphooligosaccharide--protein glycosyltransferase 48 kDa subunit	15	15	0.338365	0.586367	0.853068	568520000	746979700	864539700	732750000	445339800	679489600	584819800	805070200	50.4	50.8		335.466	-0.140229	0.545728	no	up
DDR1	Epithelial discoidin domain-containing receptor 1	9	5	0.154776	0.377354	2.30892	2707902	431382	4347102	2828999	4225299	4787097	4498199	4487400	12.4	101.13
DDRGK1	DDRGK domain-containing protein 1	7	7	0.185969	0.420092	1.15061	60436990	46710990	44724980	51927980	64676030	48535000	63583020	57576030	39.8	35.61		29.8266	-0.180655	0.746971	no	up
DDT	D-dopachrome decarboxylase;D-dopachrome decarboxylase-like protein	9	9	0.616718	0.804852	0.92796	95627960	77153950	87333020	102290000	68689970	82576980	71540010	120439900	63.6	12.712
DDX1	ATP-dependent RNA helicase DDX1	29	9	0.41137	0.651202	1.09808	72068010	54047020	64983980	61593960	56463020	78718000	62944020	81022010	45.3	82.431		108.258	0.119618	0.711109	no	down
DDX10	Probable ATP-dependent RNA helicase DDX10	27	27	0.44225	0.676138	1.04324	136199900	146010000	168110100	140030000	145010100	159950000	157129900	152150100	36.9	100.89		49.5433	-0.321478	0.412024	no	up
DDX11	Probable ATP-dependent RNA helicase DDX11	8	1	0.192496	0.430012	0.707942	618880	1080101	835150	1059000	399316	519179	731250	979540	10.3	108.31		116.069	0.39906	0.0849769	no	down
DDX17	Probable ATP-dependent RNA helicase DDX17	39	30	0.192635	0.430152	0.875	885789800	904210100	1150900000	1023400000	774790000	770719800	1020700000	907269600	52	80.272		543.597	0.0226522	0.928294	no	down
DDX18	ATP-dependent RNA helicase DDX18	34	18	0.42506	0.661656	1.13089	146810000	192740100	201260100	140050000	233020100	152210000	226100000	162669900	54.3	75.406		146.389	-0.261497	0.359393	no	up
DDX19A	ATP-dependent RNA helicase DDX19A	26	5	0.539304	0.754935	0.902629	20425000	26599010	20450990	23894000	23793000	20739990	26170000	13646000	55	53.974
DDX19B	ATP-dependent RNA helicase DDX19B	25	5	0.0309104	0.161951	0.752795	17596010	18393010	18314000	25945010	14339000	14835010	16917000	13724000	57.2	53.926		18.2914	0.207173	0.782636	no	down
DDX20	Probable ATP-dependent RNA helicase DDX20	29	22	0.00947855	0.0876686	0.776147	68278010	74657990	78698020	69525030	50159010	52256970	64769040	59618000	44.3	92.239		81.6407	-0.00220178	0.997141	no	up
DDX21	Nucleolar RNA helicase 2	58	37	0.0591946	0.219542	0.725735	1064299000	1302501000	1441499000	1109400000	656960400	815370500	1078900000	1064100000	65.9	87.343		332.49	-0.690435	0.00228405	no	up
DDX23	Probable ATP-dependent RNA helicase DDX23	35	35	0.146995	0.366426	1.08214	252029900	268280100	271320100	243749900	289499900	251060100	302790000	278630100	39.4	95.581		142.298	-0.120871	0.665409	no	up
DDX24	ATP-dependent RNA helicase DDX24	36	29	0.937151	0.977319	1.00686	185430000	164250100	192590000	194659900	182430000	157839900	225370100	180830100	45.2	96.331
DDX26B	Protein DDX26B	9	7	0.778392	0.897056	1.10526	2306500	2208099	825750	2969101	1485000	3496602	2152999	1666800	15.2	96.672
DDX27	Probable ATP-dependent RNA helicase DDX27	34	34	0.634891	0.815337	0.947826	317710000	362340200	444770300	325339900	329480100	300589900	423020100	320900200	39.3	89.834		85.8702	-0.21491	0.500991	no	up
DDX28	Probable ATP-dependent RNA helicase DDX28	21	21	0.00143137	0.0405576	0.73847	86618030	73148980	79654020	73845970	59928960	57500040	61860980	51995020	47.6	59.58		61.7153	-0.248281	0.534181	no	up
DDX31	Probable ATP-dependent RNA helicase DDX31	15	15	0.0219344	0.138509	1.32107	17878010	21971000	25126000	19703010	25839990	26214990	32521990	26884990	18.6	94.086		41.9285	-0.0940003	0.857007	no	up
DDX39A	ATP-dependent RNA helicase DDX39A	19	8	0.970228	0.988134	0.993159	94045060	88883060	65171030	45719020	62641020	73216020	81464000	64856010	48.5	49.129		120.862	-0.352887	0.126025	no	up
DDX39B	Spliceosome RNA helicase DDX39B;Spliceosome RNA helicase Ddx39b	22	11	0.508224	0.733666	1.21641	423700100	167890000	156870000	144040000	257600000	333110200	206769900	198340000	55.1	48.991
DDX3X	ATP-dependent RNA helicase DDX3X;ATP-dependent RNA helicase DDX3Y;Putative ATP-dependent RNA helicase Pl10	35	32	0.440643	0.675763	0.942918	616399800	559240300	708859600	696999900	576679800	565060400	688040300	600490300	61	73.243		291.921	-0.25809	0.188898	no	up
DDX41	Probable ATP-dependent RNA helicase DDX41	17	17	0.367603	0.613087	1.06704	36225980	43362010	39705980	47276980	46753000	41239990	42183000	46998980	29.1	69.837		93.9544	-0.124007	0.715765	no	up
DDX42	ATP-dependent RNA helicase DDX42	35	35	0.0737678	0.249224	0.85981	309270100	278760200	326120200	330039900	238820000	252760000	313000200	268409900	52.3	102.97		210.778	-0.267294	0.241227	no	up
DDX46	Probable ATP-dependent RNA helicase DDX46	40	4	0.279509	0.532882	0.43552	5607100	15054000	23327010	11600000	819142	8143999	9730694	12659000	41	117.36		159.584	-0.517848	0.0231624	no	up
DDX47	Probable ATP-dependent RNA helicase DDX47	17	6	0.241079	0.488217	0.867407	43729020	43422020	66509040	48198970	37939980	44268010	46406970	44209990	41.1	50.646		60.2444	0.446162	0.129593	no	down
DDX49	Probable ATP-dependent RNA helicase DDX49	10	4	0.586526	0.787932	0.865262	11648000	14604000	21688000	15617990	8344198	12909000	23874010	12559000	25.7	54.226		41.5824	0.171481	0.745883	no	down
DDX5	Probable ATP-dependent RNA helicase DDX5	39	30	0.913636	0.965129	1.01271	876840300	746720100	771580300	814740100	1028599000	658559600	911710100	701000400	58.5	69.147		638.094	-0.316827	0.0860758	no	up
DDX50	ATP-dependent RNA helicase DDX50	30	28	0.0298617	0.160271	1.23608	143430000	134170000	146429900	128710000	203210000	159249900	176650000	148110000	44.9	82.564		62.9643	0.268572	0.451635	no	down
DDX51	ATP-dependent RNA helicase DDX51	24	24	0.640191	0.818927	1.04402	73967020	75959950	91819020	71000950	74617040	75074980	98849940	78586050	45.8	72.456		32.2245	0.115102	0.845551	no	down
DDX52	Probable ATP-dependent RNA helicase DDX52	20	20	0.103257	0.297858	0.91684	115980000	113269900	123630100	115460000	98079040	119070000	109140000	103959900	35.9	67.497
DDX54	ATP-dependent RNA helicase DDX54	31	18	0.361592	0.610281	0.911802	78051040	73613000	98904980	88573950	71386950	66120040	86343980	85363980	44.2	98.594		173.574	0.0201101	0.951328	no	down
DDX55	ATP-dependent RNA helicase DDX55	17	17	0.241124	0.488014	0.835729	35405000	34923000	42600020	41761990	22239010	33746000	36111980	39595010	34.5	68.546		33.7877	-0.0693153	0.907168	no	up
DDX56	Probable ATP-dependent RNA helicase DDX56	20	20	0.494885	0.720467	0.905988	126049900	143290000	183070100	153749900	118120000	111770000	183270100	141559900	35.6	61.589		78.7726	-0.500391	0.115848	no	up
DDX58	Probable ATP-dependent RNA helicase DDX58	16	15	0.617117	0.804666	0.956914	12030010	10884990	11250000	10991990	10049010	11108000	9136505	13313000	18.4	106.6		12.7748	0.136721	0.883127	no	down
DDX59	Probable ATP-dependent RNA helicase DDX59	9	9	0.614252	0.804353	1.12479	2654800	3097502	3608602	3296802	4789402	4262403	1890900	4056498	18.7	68.809		18.9614	0.609796	0.254904	no	down
DDX6	Probable ATP-dependent RNA helicase DDX6	21	21	0.0368842	0.177788	0.796676	323319800	383989800	391410000	403020200	252319900	296800100	297700100	353869800	56.9	54.416		103.476	-0.42355	0.0723204	no	up
DECR1	2,4-dienoyl-CoA reductase, mitochondrial	12	11	0.649048	0.82578	1.16736	125100000	38227980	52228030	99746980	103890000	90213010	50165980	98402960	42.7	36.067		13.5862	-0.131927	0.879234	no	up
DECR2	Peroxisomal 2,4-dienoyl-CoA reductase	9	9	0.543768	0.758789	0.869091	10575000	9352505	9427898	8186196	12358010	9610197	8041204	4559998	32.9	30.777
DEF6	Differentially expressed in FDCP 6 homolog;Differentially expressed in FDCP 6	5	5	0.287714	0.539104	1.99538	7754203	2312002	752658	3563699	10282000	8261695	2454899	3655501	9.8	73.91		9.65435	0.901396	0.21241	no	down
DEF8	Differentially expressed in FDCP 8 homolog;Differentially expressed in FDCP 8	2	2	0.254152	0.505142	1.2942	1157400	1633799	686198	1295969	1245300	1574500	1844900	1304200	4.5	58.71		37.3769	0.00282207	0.997293	no	down
DEGS1	Sphingolipid delta(4)-desaturase DES1	3	3	0.179184	0.412975	0.814173	7309601	11695010	9885701	12344990	7160900	7570801	8938104	9460299	14.9	37.866		34.168	0.584093	0.128551	no	down
DEK	Protein DEK	21	21	0.107788	0.30508	1.10978	518510000	540030200	469450100	529110000	508150000	594460200	556240000	627880200	42.9	42.674		166.761	0.0927046	0.916288	no	down
DENND1A	DENN domain-containing protein 1A	4	4	0.238213	0.484141	1.16733	1141400	881540	1251101	949830	1254901	1493101	981001	1207900	5	110.58		27.2282	0.549431	0.20426	no	down
DENND2A	DENN domain-containing protein 2A	2	2	0.29942	0.547847	0.457977	784500	4412498	676719	7230900	513967	2073871	1254840	557120	4.1	113.85		17.3267	-0.00271218	0.997864	no	up
DENND4C	DENN domain-containing protein 4C	24	24	0.57494	0.780092	0.760169	28325990	29263000	47314000	27873990	6732900	27972000	43803030	44248990	15.5	212.71		46.5039	0.164281	0.712098	no	down
DENND6A	Protein DENND6A	5	5	0.146325	0.365099	0.622587	3408701	2531700	3376898	3708399	2191901	2784902	908830	2926799	10.5	69.574		9.95062	0.870232	0.234474	no	down
DENR	Density-regulated protein	7	7	0.611372	0.802919	1.05483	44702990	53346000	66592980	44467980	54898970	50014990	57219000	55645990	33.3	22.092		32.7661	-0.456562	0.361831	no	up
DEPDC1B	DEP domain-containing protein 1B	13	12	0.178362	0.412636	0.413174	9784294	9286096	12014000	12553010	796028	7955405	7855905	8026801	26.1	61.77		97.1352	0.185805	0.538763	no	down
DERA	Deoxyribose-phosphate aldolase	9	9	0.000434318	0.0316842	2.38972	8167699	7946596	10953000	12598000	24484000	22206990	20488010	26220010	37.1	35.23		16.4772	2.18798	7.6104e-06	yes	down
DERL1	Derlin-1	4	4	0.580267	0.783679	1.03872	34749010	34931000	34326010	35976980	32255990	38537980	42349010	33147990	16.3	28.8		21.0582	-0.516319	0.335454	no	up
DERL2	Derlin-2	3	3	0.136275	0.350545	1.84489	549709	1494900	2625599	1630101	3750401	2292000	1984901	2388001	17.2	27.567		15.6082	-0.04264	0.962483	no	up
DES	Desmin	18	5	0.00542557	0.0652143	0.143845	7610703	3728702	6768600	19706000	1294635	471119	1843201	1441500	39.6	53.535		2.83597	-2.62856	0.082617	no	up
DESI2	Desumoylating isopeptidase 2	2	2	0.212408	0.454288	1.43665	5369803	11797000	7266098	6653702	9895900	18740010	7299200	9638304	24.2	21.434		38.6719	0.0919447	0.864294	no	down
DFFA	DNA fragmentation factor subunit alpha	10	10	0.200775	0.438117	0.789874	64818980	73252040	65198000	76721960	38110000	57447990	51404000	82147960	39.9	36.521		64.9647	-0.0288162	0.951056	no	up
DFFB	DNA fragmentation factor subunit beta	3	3	0.0897769	0.276857	0.634655	2450502	1868699	2239900	2025200	710358	1805401	1572401	1671200	12.7	39.109		6.55573	-0.313351	0.78717	no	up
DGAT1	Diacylglycerol O-acyltransferase 1	5	3	0.147441	0.366337	1.39864	4162700	3030199	3169499	3408101	6953901	6278097	3619702	3299501	15.6	55.278		16.6773	0.455044	0.466162	no	down
DGCR14	Protein DGCR14	12	12	0.378112	0.619156	0.892607	8224598	8736698	8500001	8834100	9235006	5441303	8674696	7857598	40.8	52.567
DGCR2	Integral membrane protein DGCR2/IDD	1	1	0.0670326	0.23419	0.513894	957940	1389600	2375702	709311	819997	784106	539978	450597	2.2	60.696		75.5635	0.240082	0.466769	no	down
DGCR8	Microprocessor complex subunit DGCR8	11	11	0.603761	0.798552	1.05789	15591010	14224990	15419000	17718000	13979000	14596010	20768010	17908000	16.3	86.044		78.7962	-0.509985	0.0533452	no	up
DGKA	Diacylglycerol kinase alpha	4	4	0.220698	0.46321	0.554203	1618101	2482445	798360	653460	1342800	314645	606149	771910	8.3	82.629		6.27934	1.09776	0.224858	no	down
DGKE	Diacylglycerol kinase epsilon	2	2	0.00344568	0.0579381	1.823	870970	1158300	1307501	1546200	2136601	1986399	2161801	2455100	4.8	63.926		5.29511	1.13937	0.264784	no	down
DGKZ	Diacylglycerol kinase zeta	9	9	0.945574	0.980174	1.04993	7120899	3610501	2921398	584019	4802203	5080002	2783900	784889	14.7	103.98		121.783	-0.666262	0.00195169	no	up
DGUOK	Deoxyguanosine kinase, mitochondrial	1	1	0.378524	0.619795	0.706656	3006599	5502002	1580001	2971700	2836200	967942	2392701	2948599	9	32.055		56.8968	0.266943	0.464148	no	down
DHCR24	Delta(24)-sterol reductase	13	13	0.858199	0.938394	1.02849	151350000	253590100	301630100	239330100	235730100	235110200	218570000	255920100	21.1	60.101		597.891	-0.242512	0.191483	no	up
DHCR7	7-dehydrocholesterol reductase	10	8	0.816134	0.919255	1.05519	276729900	240899900	190660100	172380000	336539900	271969800	217100000	136690000	20.6	54.489		233.68	-0.175368	0.501808	no	up
DHDDS	Dehydrodolichyl diphosphate syntase complex subunit DHDDS	6	6	0.0269559	0.151156	1.46889	2580200	2611899	2524000	2068099	5061600	2956101	3161602	3461901	16.5	38.657		25.8223	0.0849737	0.898324	no	down
DHFR	Dihydrofolate reductase	8	8	0.381195	0.622282	1.1697	45802020	42045030	50570980	69568980	46240020	57377020	56969980	83909040	49.7	21.452		35.0298	0.366448	0.401738	no	down
DHODH	Dihydroorotate dehydrogenase (quinone), mitochondrial	13	13	0.865549	0.942362	0.980412	70909020	56409970	63289990	51870000	64272000	72655980	52233970	49739020	40.3	42.867		13.4904	-0.516035	0.448661	no	up
DHPS	Deoxyhypusine synthase	10	10	0.0613329	0.222826	1.22481	16918990	19384990	17566000	18688990	19285990	23764990	19467000	27158000	36.3	40.97		30.0207	0.48923	0.27258	no	down
DHRS1	Dehydrogenase/reductase SDR family member 1	5	5	0.00924959	0.0859689	0.514379	7394005	10472000	16682000	10912000	5260599	6599499	5116298	5555103	22.4	33.909		6.0464	-0.465994	0.701817	no	up
DHRS11	Dehydrogenase/reductase SDR family member 11	4	4	0.86868	0.944849	1.14925	16148010	543970	6287699	10897000	2869401	8588800	8730705	4879500	17.7	28.308
DHRS13	Dehydrogenase/reductase SDR family member 13	5	5	0.0722958	0.245975	1.35288	12297010	11811000	11997000	10158000	17971990	17509010	17930010	10509010	11.9	40.848		36.4698	0.187195	0.724321	no	down
DHRS3	Short-chain dehydrogenase/reductase 3	3	3	0.402833	0.640735	1.29496	865867	1531600	1874799	715082	1084816	1288600	2433999	1469400	13.2	33.548		13.8306	-0.500438	0.454423	no	up
DHRS4	Dehydrogenase/reductase SDR family member 4;Putative dehydrogenase/reductase SDR family member 4-like 1	4	1	0.0209267	0.134906	1.7704	7623502	5156601	5674298	6138504	14652000	13597000	7316997	9227903	15.1	29.537		9.04375	0.989531	0.168247	no	down
DHRS7	Dehydrogenase/reductase SDR family member 7	9	9	0.00247838	0.0491639	1.98106	12179010	17102010	19866990	19476010	27322000	39669000	32994000	34712000	33.9	38.298		22.5204	0.862882	0.0521602	no	down
DHRS7B	Dehydrogenase/reductase SDR family member 7B	10	10	0.209249	0.45115	0.803611	42213010	45027020	65199980	34210980	37336000	44022010	35778990	30066980	30.5	35.119		15.3364	0.127855	0.88242	no	down
DHRSX	Dehydrogenase/reductase SDR family member on chromosome X	1	1	0.356856	0.604647	1.41377	1268021	547350	565040	1152198	2318993	1018800	1180099	647450	5.2	36.443
DHTKD1	Probable 2-oxoglutarate dehydrogenase E1 component DHKTD1, mitochondrial	14	14	0.828972	0.924389	0.959095	31636000	49570970	61355020	49407980	55826010	37590980	35087990	54628980	23.7	103.08		94.4444	0.409239	0.094605	no	down
DHX15	Pre-mRNA-splicing factor ATP-dependent RNA helicase DHX15	42	41	0.359603	0.60795	1.05103	992800400	989189600	1180900000	1071899000	1077000000	1046001000	1187100000	1134300000	51.1	90.932		351.776	-0.117733	0.664252	no	up
DHX16	Putative pre-mRNA-splicing factor ATP-dependent RNA helicase DHX16	27	26	0.0773779	0.256171	0.907734	77488020	66058000	68364000	75651980	63479960	66288000	61890020	69016030	31.3	119.26
DHX29	ATP-dependent RNA helicase DHX29	35	22	0.00364022	0.0579934	0.748935	56313030	63676990	61130980	72471020	47776000	46568000	43650000	51465000	35.1	155.23		85.2892	-0.206479	0.544561	no	up
DHX30	Putative ATP-dependent RNA helicase DHX30	44	44	0.0158121	0.116967	0.901603	315269800	347109900	354309900	324449900	292640000	299829900	313760000	301950100	42.8	133.94		250.837	-0.0130342	0.969473	no	up
DHX32	Putative pre-mRNA-splicing factor ATP-dependent RNA helicase DHX32	3	3	0.979545	0.992008	1.00936	1256599	1517300	1008800	890780	482902	1230501	1260999	2373400	5.5	84.418		34.3297	0.210633	0.67938	no	down
DHX33	Putative ATP-dependent RNA helicase DHX33	23	23	0.659872	0.831658	1.06005	42152000	53374990	65258020	57792000	45939980	54300990	64207960	66890960	30.6	78.873		122.717	-0.234686	0.369847	no	up
DHX34	Probable ATP-dependent RNA helicase DHX34	17	13	0.806983	0.914677	0.983337	8542597	8724302	9240599	8673595	10040000	7359101	8655702	8733095	20.5	128.12		110.913	-0.714267	0.0033699	no	up
DHX35	Probable ATP-dependent RNA helicase DHX35	15	15	0.0507164	0.202953	0.830453	11232000	10456000	12391010	11892000	10514000	9674702	7852198	10305000	26.3	78.909		23.6084	-0.54525	0.28602	no	up
DHX36	ATP-dependent RNA helicase DHX36	30	17	0.787495	0.902894	0.975411	40335020	43447000	52460970	39672980	36361000	41426000	45928020	47723980	35.8	114.76		80.4174	0.0238045	0.959132	no	down
DHX37	Probable ATP-dependent RNA helicase DHX37	34	34	0.556491	0.767417	0.919245	132360100	134230000	171690000	145859900	99176940	123960000	174700000	147920000	33.1	129.54		122.691	-0.472337	0.0289268	no	up
DHX38	Pre-mRNA-splicing factor ATP-dependent RNA helicase PRP16	25	25	0.350393	0.598647	0.918761	46471010	43164000	52424010	58880980	40589970	45497000	46485020	51393000	24.4	140.5		91.7337	-0.433817	0.0755522	no	up
DHX40	Probable ATP-dependent RNA helicase DHX40	8	8	0.354876	0.603012	1.11212	7474303	7394298	8464497	9769804	10158000	9449698	7153803	10180990	11.8	88.559		45.5928	0.319042	0.39875	no	down
DHX57	Putative ATP-dependent RNA helicase DHX57	30	29	0.0525472	0.206414	0.843533	56565010	66510010	55082030	63859000	49274980	44332020	54772970	55996980	24.5	155.6		57.9609	-0.064843	0.891381	no	up
DHX8	ATP-dependent RNA helicase DHX8	29	28	0.43184	0.668918	1.06184	62872000	53820980	72762970	62902010	65567970	60835970	72028010	68527970	31.7	139.31		89.7036	0.0502176	0.908426	no	down
DHX9	ATP-dependent RNA helicase A	61	30	0.520142	0.740912	0.928039	1041799000	1139800000	1468100000	1162700000	952539500	1041100000	1392699000	1088600000	56.1	140.96		580.282	-0.35645	0.0393836	no	up
DIABLO	Diablo homolog, mitochondrial	10	10	0.251201	0.501027	1.35447	21004010	27310990	31000000	16839990	53267980	30394990	20517990	30339990	55.2	27.131
DIAPH1	Protein diaphanous homolog 1	46	46	0.0824603	0.265949	0.875363	185979900	191319900	193770000	207669900	156570000	159289900	166290000	202710100	39.6	141.35		186.428	-0.545244	0.00384802	no	up
DIAPH2	Protein diaphanous homolog 2	17	17	0.825685	0.923536	1.15797	38479990	124100100	130670100	70278020	27648020	49306970	333360000	173500100	18.3	125.57		63.3317	-0.0753249	0.878134	no	up
DIAPH3	Protein diaphanous homolog 3	19	13	0.0483089	0.200423	0.664863	12021990	11901000	9745796	12818000	5121401	8152197	7735302	10814010	18.4	136.92		42.3533	-0.406556	0.295971	no	up
DICER1	Endoribonuclease Dicer	27	27	0.00848098	0.0829136	1.42942	22713010	25835000	22896010	27812000	33637980	35245000	30053990	43781020	18.7	218.68		161.759	0.134442	0.619964	no	down
DIDO1	Death-inducer obliterator 1	62	62	0.661559	0.832446	0.956227	210729900	223140000	261839800	252299900	228770100	186929900	279179900	217539900	37.9	243.87		203.293	-0.541699	0.00264504	no	up
DIEXF	Digestive organ expansion factor homolog	22	22	0.182029	0.416445	0.882073	53558000	63840010	68476980	64109990	52637010	47241000	57009990	64098040	32.4	87.054
DIMT1	Probable dimethyladenosine transferase	13	13	0.869545	0.945053	1.04524	43119000	58450990	63928020	63362990	29040000	80933050	78599970	65964020	47.3	35.236		15.598	-0.0953137	0.909996	no	up
DIP2A	Disco-interacting protein 2 homolog A	11	3	0.243785	0.492249	1.42235	1448200	785310	420342	851962	897531	1042300	1411600	1262319	9.4	170.37		42.0431	-0.00868957	0.989438	no	up
DIP2B	Disco-interacting protein 2 homolog B	23	6	0.444387	0.677175	1.15738	9456397	8028903	8626901	4728699	9371603	8377403	6861899	10316000	20.9	171.49		74.414	-0.153565	0.684748	no	up
DIP2C	Disco-interacting protein 2 homolog C	9	6	0.357329	0.604877	1.4563	921430	2174908	724640	533582	1563799	1968999	1603901	705712	6.6	170.77		34.7451	0.246738	0.630207	no	down
DIRAS1	GTP-binding protein Di-Ras1	2	2	0.186925	0.421383	1.58517	614190	949304	1040612	924750	2479358	1596650	628749	1423292	10.6	22.264		8.11421	0.982111	0.215177	no	down
DIRC2	Disrupted in renal carcinoma protein 2	2	2	0.578884	0.783335	1.20436	1208700	630016	1027793	1316883	2226499	1605700	897259	675986	6.9	52.087
DIS3	Exosome complex exonuclease RRP44	28	18	0.263872	0.517284	0.863999	84741030	85896970	104870100	116130100	75833020	72108990	83584960	108080000	35.6	109		89.7954	-0.0557682	0.891873	no	up
DIS3L	DIS3-like exonuclease 1	15	15	0.0226168	0.140348	0.270197	7518803	14727000	13022990	13810000	1152301	2540700	6834701	5304598	18	120.79		72.1207	0.350051	0.219022	no	down
DIS3L2	DIS3-like exonuclease 2	12	12	0.7447	0.879356	1.08094	14752000	7261796	14264000	13721000	18743010	12839000	8858098	13428000	12.2	99.278		25.9542	0.294334	0.614514	no	down
DKC1	H/ACA ribonucleoprotein complex subunit 4	28	18	0.303219	0.550827	1.11043	184570000	142170000	203470000	173799900	203640100	164960000	201839900	208079900	48.1	57.673		102.262	-0.205642	0.526626	no	up
DLAT	Dihydrolipoyllysine-residue acetyltransferase component of pyruvate dehydrogenase complex, mitochondrial	21	10	0.0108156	0.0934691	0.645802	134919900	188440100	142920100	127340000	80995020	119060000	87782050	95077060	39.4	68.996		93.8155	-0.609442	0.00564137	no	up
DLD	Dihydrolipoyl dehydrogenase, mitochondrial	17	10	0.0331521	0.168211	0.711831	189820100	250899900	277359900	331720100	165410100	188039900	200589900	180319900	41.5	54.177		68.1569	-0.56722	0.0453249	no	up
DLG1	Disks large homolog 1	23	21	0.375241	0.61732	1.07322	53447020	58091980	70400960	60862040	67827980	60944000	72094980	59220970	35	100.45		52.0851	-0.255906	0.539497	no	up
DLG3	Disks large homolog 3	16	15	0.00189134	0.046599	0.672301	53190990	51333980	69313030	52489000	39853980	38735000	37264990	35278000	19	90.313		22.0701	-0.331214	0.572227	no	up
DLG5	Disks large homolog 5	16	6	0.130325	0.342599	1.40221	4741501	4673601	7389705	5384198	5500497	6205200	9151894	10912000	10.4	213.87
DLGAP4	Disks large-associated protein 4	7	7	0.151119	0.371708	1.20291	16335010	15455010	14382010	12695990	21411000	18996990	13468010	17619010	9.6	108.01		56.8331	0.113092	0.79294	no	down
DLGAP5	Disks large-associated protein 5	28	28	0.730773	0.874782	0.966296	84730950	117610000	118369900	100350000	86553010	103320100	104570000	110360000	35.5	95.114		170.248	-0.0783329	0.845324	no	up
DLST	Dihydrolipoyllysine-residue succinyltransferase component of 2-oxoglutarate dehydrogenase complex, mitochondrial	17	12	0.49276	0.718507	1.11346	290620100	223190100	202820000	199070000	345930200	263570200	207820100	212439900	47.5	48.755		81.5936	-0.0732468	0.855532	no	up
DMAP1	DNA methyltransferase 1-associated protein 1	14	14	0.669704	0.835723	1.07044	23262000	21664990	37265980	26996010	21900990	32218020	28927000	32614000	36.2	52.992		47.6338	-0.163308	0.720212	no	up
DMD	Dystrophin	14	13	0.309725	0.55838	0.73848	25865010	37425010	21045010	25941000	29583020	20877990	25858000	9840999	4.6	426.74		96.3811	-3.01202	1.1718e-12	yes	up
DMXL1	DmX-like protein 1	30	13	0.0996012	0.292695	0.437427	7658404	7865299	8568997	9519895	1905601	5458697	1739701	9941298	13.6	337.83		101.249	0.0973226	0.81093	no	down
DNA2	DNA replication ATP-dependent helicase/nuclease DNA2;DNA replication nuclease DNA2;DNA replication ATP-dependent helicase DNA2	18	16	0.324638	0.574034	0.558733	7731897	11838000	15941990	19765990	1662001	9215796	12019010	15268990	19.1	120.41		60.1559	-0.271967	0.468256	no	up
DNAAF2	Protein kintoun	9	9	0.0524137	0.20662	0.530874	8824295	22270000	19431000	14509010	6388299	7511699	13192000	6951300	15.1	91.113		104.981	0.00154927	0.997453	no	down
DNAAF5	Dynein assembly factor 5, axonemal	25	25	0.00877973	0.0832127	0.87888	89526980	87096990	93332970	96226050	75073990	80437020	81463030	84936980	36.5	93.52		155.324	0.0174532	0.96016	no	down
DNAJA1	DnaJ homolog subfamily A member 1	18	1	0.322258	0.572408	0.590329	3304102	4426901	909061	1511950	767363	1886101	2526701	667637	57.7	44.868		163.678	-0.277575	0.323971	no	up
DNAJA2	DnaJ homolog subfamily A member 2	19	19	0.779486	0.897754	0.990385	213799900	187419900	194520000	195350100	201150000	196530000	199230100	186000100	48.8	45.745		131.35	-0.590908	0.00352093	no	up
DNAJA3	DnaJ homolog subfamily A member 3, mitochondrial	9	9	0.0248507	0.146577	0.725242	74260980	67853000	84983030	64323000	48380990	68627970	48550020	47270980	18.5	52.488
DNAJA4	DnaJ homolog subfamily A member 4	4	4	0.736208	0.877397	0.710237	543600	18470010	985179	8370495	3773499	632851	1614323	5465001	11.1	44.797		5.12119	-1.60615	0.110303	no	up
DNAJB1	DnaJ homolog subfamily B member 1	17	16	0.511984	0.736735	1.06376	76005970	80366980	76910960	82916980	71406020	95135020	73523030	99871010	50.6	38.044		53.1155	0.26188	0.480846	no	down
DNAJB11	DnaJ homolog subfamily B member 11	15	15	0.143726	0.359642	0.956958	117320000	110209900	118320000	108990000	110969900	112240000	105110100	106810000	31.6	40.513		38.8283	-0.698492	0.0481247	no	up
DNAJB12	DnaJ homolog subfamily B member 12	10	10	0.824061	0.922749	1.02139	23089990	25686990	22647010	24605000	19066010	25919990	25677010	28345990	30.9	41.859		22.4141	-0.246259	0.68983	no	up
DNAJB14	DnaJ homolog subfamily B member 14	7	7	0.326691	0.575166	1.89495	1467340	8345401	12472000	7621698	4200003	23671990	14999010	10065000	19	42.515		15.3032	0.309852	0.671644	no	down
DNAJB2	DnaJ homolog subfamily B member 2	7	6	0.580896	0.783916	1.18353	3139098	4203503	2755901	3207501	1947987	5067600	3339798	6941501	21.9	35.58		13.626	-0.281141	0.738142	no	up
DNAJB4	DnaJ homolog subfamily B member 4	6	5	0.79449	0.905957	1.11549	1574400	2551600	3112802	3618601	5833303	1071387	3047700	3678301	22.6	37.806		6.35171	0.287665	0.817967	no	down
DNAJB5	DnaJ homolog subfamily B member 5	9	9	0.0147355	0.11361	0.85327	14993000	14377010	15699990	17661010	13019000	13383000	13081010	13901000	30.2	39.133		30.3712	0.903764	0.0121154	no	down
DNAJB6	DnaJ homolog subfamily B member 6	13	12	0.249844	0.499175	0.906141	154820000	179459900	196830100	193409900	163890000	150600100	151590100	190590000	45.7	36.087		100.49	-0.483538	0.049569	no	up
DNAJB9	DnaJ homolog subfamily B member 9	4	4	0.216406	0.459846	1.37432	2158200	3075699	2495000	1402700	3759198	4025203	2016799	2715700	26	25.518		7.34284	0.370578	0.73337	no	down
DNAJC1	DnaJ homolog subfamily C member 1	11	11	0.0256405	0.148675	1.40668	11112000	11291010	13029000	10902000	18496010	17164000	18627000	11800000	26.5	63.882		19.4059	0.204936	0.772035	no	down
DNAJC10	DnaJ homolog subfamily C member 10	16	10	0.000498711	0.0294713	1.55513	48887010	40134000	50943000	42215020	66111040	76535050	68805030	70888020	23.7	91.079		84.5132	0.0562146	0.89718	no	down
DNAJC11	DnaJ homolog subfamily C member 11	21	21	0.427509	0.665169	0.918663	136220100	114360000	150620000	131320000	127360000	147710100	99869030	116810000	40.4	63.277		72.9456	-0.333762	0.260831	no	up
DNAJC13	DnaJ homolog subfamily C member 13	54	54	0.00398093	0.0576988	0.744218	86252020	104590000	96994960	96741000	61872020	75601980	70988000	78199980	30	254.41		81.2936	-0.603376	0.0151023	no	up
DNAJC15	DnaJ homolog subfamily C member 15	5	5	0.942194	0.979577	0.954633	3790098	813658	664766	482057	1221200	2211301	313190	970431	38	16.383		7.94864	-1.18311	0.118561	no	up
DNAJC16	DnaJ homolog subfamily C member 16	13	13	0.960252	0.985929	1.00565	29922000	25237000	28673000	23170010	28729990	25539990	32782990	21331010	19.2	90.59		20.8563	-0.545034	0.30004	no	up
DNAJC17	DnaJ homolog subfamily C member 17	8	8	0.110438	0.309774	0.489024	14110010	17718000	68017000	40190980	14586000	14989000	17549010	10187000	32.2	34.687		10.5845	0.337301	0.724846	no	down
DNAJC18	DnaJ homolog subfamily C member 18	1	1	0.671835	0.836583	0.809373	1195199	2140500	428615	1021400	2044710	471908	514913	967368	4.2	41.433		11.9076	0.751595	0.257052	no	down
DNAJC19	Mitochondrial import inner membrane translocase subunit TIM14	8	8	0.8474	0.933315	0.957589	29887010	35879980	40767020	19954010	44039010	30336980	23275010	23588010	62.9	12.498		7.33017	-0.180809	0.88407	no	up
DNAJC2	DnaJ homolog subfamily C member 2;DnaJ homolog subfamily C member 2, N-terminally processed	21	21	0.422032	0.658198	0.941809	86468030	83873990	82058940	96169960	95843000	82899010	71904980	78819020	39.1	71.996		49.3312	-0.585011	0.0778235	no	up
DNAJC21	DnaJ homolog subfamily C member 21	13	13	0.167957	0.398506	1.17005	18522000	17709010	18730990	20286000	25608020	17075010	20986000	25455980	30.7	62.027		37.7783	0.120231	0.830176	no	down
DNAJC25	DnaJ homolog subfamily C member 25	7	7	0.470909	0.70146	0.401677	17549010	6947101	355793	18222010	5708104	9803406	495258	742436	19.7	42.403		7.9039	-0.356684	0.727659	no	up
DNAJC3	DnaJ homolog subfamily C member 3	22	22	0.00574249	0.0662857	0.797929	147910000	170770000	170879900	155930100	115619900	127650000	131719900	140339900	51.6	57.579		20.4294	-0.776475	0.138354	no	up
DNAJC30	DnaJ homolog subfamily C member 30	3	3	0.51333	0.737025	1.40015	1824199	2507699	2278399	2635301	13064000	2310801	2273900	1537800	16.8	25.961		14.6642	-0.329628	0.648548	no	up
DNAJC5	DnaJ homolog subfamily C member 5	5	5	0.706497	0.859648	0.69302	7805301	4865199	772283	737797	8978301	534379	461828	2252483	37.4	22.149		15.3137	-0.539885	0.422976	no	up
DNAJC7	DnaJ homolog subfamily C member 7	27	27	0.509665	0.734979	0.918002	113290000	158550000	143020100	155459900	140990100	97849020	140219900	146620000	47.8	56.44		88.8258	-0.430209	0.124067	no	up
DNAJC8	DnaJ homolog subfamily C member 8	16	16	0.673629	0.838099	1.02687	168399900	155510100	160830000	142270100	176650000	149310100	146520000	172400100	45.8	29.841		55.6432	-0.345465	0.42073	no	up
DNAJC9	DnaJ homolog subfamily C member 9	13	13	0.428632	0.666176	1.07101	74388030	84484980	87177980	74600960	90934950	84527990	71077970	98434060	45.4	29.909		58.9689	-0.481854	0.168089	no	up
DND1	Dead end protein homolog 1	6	6	8.29315e-05	0.0145185	0.0589979	16856990	22020000	11969010	17605010	1715169	910830	478080	1268801	22.9	38.687		17.194	-0.791977	0.138474	no	up
DNLZ	DNL-type zinc finger protein	3	3	0.961915	0.986049	0.989262	4471600	5622302	6101802	2686201	5210699	4700799	5056998	3186098	33.7	19.204		17.5719	0.0729665	0.929234	no	down
DNM1	Dynamin-1	13	5	0.414713	0.653254	0.72449	919440	2694699	799264	1565814	1295301	567192	1598289	727507	17.5	97.407		25.6341	0.680427	0.11366	no	down
DNM1L	Dynamin-1-like protein	37	37	0.369244	0.614163	0.920927	272480200	293270100	244340000	255980000	239450100	235839900	211000000	301709900	58.3	81.876		80.2446	0.285708	0.367938	no	down
DNM2	Dynamin-2	39	26	0.983328	0.993614	1.00106	139550100	129100100	143440100	129550100	133080000	121500000	143440100	144960000	47.8	98.063		198.284	-0.130549	0.631246	no	up
DNMBP	Dynamin-binding protein	12	12	0.178454	0.412649	1.60039	9551500	3543600	10555000	7474402	18284000	7802196	9541504	12869010	9.3	177.35		42.887	0.525331	0.125771	no	down
DNMT1	DNA (cytosine-5)-methyltransferase 1	58	58	0.460492	0.693631	0.935857	394170100	426880300	429379800	416950100	316089900	372350000	454989800	431509900	41.3	183.16		281.024	0.187111	0.361175	no	down
DNMT3A	DNA (cytosine-5)-methyltransferase 3A	43	13	0.172182	0.403583	0.846896	77772000	61580040	80195980	70743000	60198000	52774980	78932990	55738030	54.9	101.86		168.951	-0.337666	0.0996558	no	up
DNMT3B	DNA (cytosine-5)-methyltransferase 3B	44	29	0.0708405	0.241963	0.644481	385090000	470980000	766750100	548370200	249950000	294910100	382800200	466249800	58.6	95.75		1279.07	-0.442942	0.000718089	no	up
DNPEP	Aspartyl aminopeptidase	13	13	0.93403	0.976017	0.992762	50558010	44270000	42426010	40893010	48376000	41851980	37024020	50319020	34.8	53.41		38.0818	0.400247	0.306957	no	down
DNPH1	2-deoxynucleoside 5-phosphate N-hydrolase 1	3	3	0.799151	0.908685	0.882143	3354299	3344601	2880401	3655602	6695998	3636302	757565	3878101	24.1	19.108		20.5133	1.03363	0.0335949	yes	down
DNTTIP1	Deoxynucleotidyltransferase terminal-interacting protein 1	5	5	0.899944	0.95796	0.972228	5132402	5174801	4906300	4589003	2574799	5549803	5558798	6726005	18.8	37.013		16.0258	0.0723753	0.933328	no	down
DNTTIP2	Deoxynucleotidyltransferase terminal-interacting protein 2	26	20	0.872555	0.946215	0.980385	97551030	105270000	135440000	106180100	85470020	105370000	135209900	112040000	41.8	84.468		130.384	-0.33762	0.324538	no	up
DOCK1	Dedicator of cytokinesis protein 1	29	10	0.686152	0.846258	1.08859	4705500	4856299	4962901	3024600	3538100	7038301	3695600	5234202	19.8	215.34		115.793	-0.022307	0.953945	no	up
DOCK2	Dedicator of cytokinesis protein 2	8	8	0.123483	0.333974	0.310387	4042899	4403203	7214800	570609	2224349	949894	446278	721364	5	211.95		7.38979	-0.118592	0.919871	no	up
DOCK4	Dedicator of cytokinesis protein 4	27	26	0.226371	0.471355	0.719789	14150000	18656010	20383000	21944990	7371497	12286000	17091000	20476990	17.5	225.2		45.3379	-0.50145	0.15824	no	up
DOCK5	Dedicator of cytokinesis protein 5	11	10	0.982922	0.993661	0.992086	1729381	1904500	2637501	3223502	894650	2522699	3034200	3961198	7	215.31		24.9467	-0.389218	0.463874	no	up
DOCK6	Dedicator of cytokinesis protein 6	28	15	0.633876	0.815117	0.940808	16080010	19564010	16403010	14857010	20394990	16789000	14016010	12514990	15.8	229.56		90.4907	0.0315933	0.946315	no	down
DOCK7	Dedicator of cytokinesis protein 7	41	35	0.154085	0.37613	1.10844	46821970	51443980	53748030	51286030	47699000	57762980	60801000	59831030	25.2	242.56		66.5313	0.455274	0.131031	no	down
DOCK9	Dedicator of cytokinesis protein 9	19	19	0.282118	0.535177	0.623366	9688794	8362199	10103000	10078000	1815900	8521300	8089197	9951397	12.7	236.44		39.4468	-0.225386	0.61804	no	up
DOHH	Deoxyhypusine hydroxylase	5	5	0.153145	0.374603	0.49935	2346301	1868200	4614598	3480998	2401600	1707300	481472	2217601	28.1	32.904		26.1641	-0.880596	0.051928	no	up
DONSON	Protein downstream neighbor of Son	3	3	0.362701	0.610668	1.27986	1099700	538750	1134300	755950	1390900	1453500	672560	1002500	7.4	62.746		37.015	-0.0491977	0.930019	no	up
DOPEY2	Protein dopey-2	5	2	0.0533992	0.207187	2.04612	656407	1490600	519507	390014	1473664	1578499	1352200	1104701	2.4	258.23
DOT1L	Histone-lysine N-methyltransferase, H3 lysine-79 specific	10	10	0.0313729	0.163278	2.99716	449523	460536	1672100	1797199	2328499	2651801	2515599	3231900	8.7	164.85		182.159	-0.184393	0.538763	no	up
DPCD	Protein DPCD	5	5	0.00387677	0.0585556	0.494534	13381010	13004000	11441000	15800000	6097004	8059905	8348899	4585601	23.6	23.239		8.1245	-0.419071	0.665008	no	up
DPEP3	Dipeptidase 3	3	3	0.0436919	0.193634	0.37015	924318	3595302	2030500	1368501	959487	1037812	353001	493156	9	53.687
DPF2	Zinc finger protein ubi-d4	13	13	0.00145372	0.0411737	1.50412	37017020	46016030	50945970	47021970	65660960	65282960	73370000	66408970	37.6	44.155		49.7549	0.0549941	0.911564	no	down
DPH1	Diphthamide biosynthesis protein 1	9	9	0.100342	0.294441	0.754742	15633010	15307010	12818000	17831010	8681201	16058990	10692000	11906010	26.9	48.805		23.7149	0.050036	0.94545	no	down
DPH2	Diphthamide biosynthesis protein 2	11	11	0.529482	0.747996	0.815571	24415990	20067000	25023000	25223990	8018698	22937010	23483990	31677020	33.7	52.082		96.3784	-0.711684	0.00224884	no	up
DPH5	Diphthine synthase	6	4	0.221308	0.464048	0.473245	6723897	4468798	8475202	22660010	2034299	2595599	3964200	13827990	24.9	31.651		21.684	0.0784463	0.917468	no	down
DPH6	Diphthine--ammonia ligase	8	8	0.138179	0.35205	0.790341	7841502	10479990	10259000	11604000	7618303	7868305	6114101	10414990	36.7	30.306		11.4445	-0.278929	0.748345	no	up
DPH7	Diphthine methyltransferase	3	3	0.2748	0.528707	0.668675	1779599	1076130	2923701	2951598	1099589	785796	2266499	1687099	10	50.575		32.4076	0.0245657	0.968536	no	down
DPM1	Dolichol-phosphate mannosyltransferase subunit 1	13	6	0.949001	0.981936	0.987393	52904990	71443040	62199020	69208000	37476010	74108960	83624980	66587960	45.4	29.634		42.083	-0.207359	0.64168	no	up
DPM3	Dolichol-phosphate mannosyltransferase subunit 3	1	1	0.514001	0.737077	1.4217	6034199	3392399	871037	4532902	8449805	5150203	2828699	2682301	10.9	10.094		14.4007	0.55853	0.392414	no	down
DPP3	Dipeptidyl peptidase 3	27	17	0.764887	0.888696	1.03346	117850000	120319900	119400100	168370100	120120000	131640000	129270000	159079900	50.2	82.588		133.883	0.0168164	0.965799	no	down
DPP6	Dipeptidyl aminopeptidase-like protein 6	6	6	0.0290895	0.159101	0.417909	2225299	993699	2682492	1770671	895384	914490	993839	393677	8.2	91.259		8.83971	-0.849787	0.284016	no	up
DPP9	Dipeptidyl peptidase 9	13	4	0.69578	0.853306	1.14723	2602200	2725901	2481700	805449	3508099	1885101	1695601	2190299	17.1	98.262		69.3367	-0.528019	0.0514009	no	up
DPPA2	Developmental pluripotency-associated protein 2	10	10	0.213036	0.455443	0.490911	13425000	27557990	18043010	18205010	2209401	13351000	20430990	11711000	35.9	33.784		13.2321	-1.51052	0.00860698	yes	up
DPPA3	Developmental pluripotency-associated protein 3	4	4	0.00817802	0.0819874	0.349708	3234601	4532200	4080201	3897201	1721049	1763705	1839999	624238	35.2	17.851		28.6386	-3.04212	9.00533e-11	yes	up
DPPA4	Developmental pluripotency-associated protein 4	14	14	0.0187906	0.127185	1.26492	148969900	141759900	187770100	180080000	206830100	192630000	215050100	213360000	43.1	33.54		420.731	-0.481562	0.00532221	no	up
DPY19L1	Probable C-mannosyltransferase DPY19L1	8	8	0.132161	0.343597	0.570913	7997597	12974990	12132000	7919097	2445699	9449598	6540702	7006697	16.7	77.318		19.0364	-0.0790286	0.919233	no	up
DPY19L3	Probable C-mannosyltransferase DPY19L3	6	6	0.0625627	0.224654	1.41629	6574201	6169698	7493904	4352001	10895990	8704704	8345004	6724600	8.9	83.196		53.7087	-0.22597	0.566474	no	up
DPY19L4	Probable C-mannosyltransferase DPY19L4	2	2	0.152814	0.374273	0.747907	977001	1029561	1365199	2038189	1028400	830480	1071000	957412	2.6	83.755		18.3655	0.0566428	0.942111	no	down
DPY30	Protein dpy-30 homolog	2	2	0.221253	0.46416	1.2299	33560020	35217000	46479980	44465980	65738010	35342990	47262980	50898980	38.4	11.25		20.3808	-0.323395	0.610047	no	up
DPYSL2	Dihydropyrimidinase-related protein 2	29	5	0.652307	0.827448	1.06928	148589900	100520000	113460000	122540000	140239900	107860100	105150000	170679900	69.9	62.293		178.218	-0.193554	0.463874	no	up
DPYSL3	Dihydropyrimidinase-related protein 3	26	21	0.0687074	0.236985	0.8289	1054600000	1094400000	1047501000	1132101000	782089700	860330000	841890500	1140601000	65.8	61.963		693.662	-0.627765	1.50531e-06	no	up
DPYSL4	Dihydropyrimidinase-related protein 4	13	6	0.772675	0.893924	1.13289	5158899	3357902	3376501	5190403	14645990	4077403	2374901	3526099	34.4	61.877		18.8313	0.628897	0.236796	no	down
DPYSL5	Dihydropyrimidinase-related protein 5	7	7	0.0267519	0.151314	5.37662	11433000	2448999	2056101	4680298	76250030	17996010	13795000	11895010	14.9	61.421		9.99993	2.74736	8.29574e-05	yes	down
DR1	Protein Dr1	1	1	0.471688	0.701547	1.17177	3040199	1572900	2836601	2517701	3905500	2955601	1943899	2869299	8	19.43		30.6995	-0.597588	0.129125	no	up
DRAP1	Dr1-associated corepressor	5	5	0.78546	0.90132	0.955768	28868010	22717990	29027990	39073020	32800980	32922020	28332020	20288010	30.2	22.35		37.3683	0.560572	0.140549	no	down
DRG1	Developmentally-regulated GTP-binding protein 1	17	17	0.367258	0.612974	0.89817	274790000	260190000	260839900	305240200	182799900	277160100	253219900	288759900	48.8	40.542		73.5398	-0.423067	0.11557	no	up
DRG2	Developmentally-regulated GTP-binding protein 2	13	13	0.0202086	0.132188	0.756725	85828980	102560000	88061020	113050000	67901990	81036040	64235980	81297980	38.7	40.746		23.862	0.0798589	0.907685	no	down
DROSHA	Ribonuclease 3	16	16	0.81337	0.91814	1.04007	10592990	14851000	10452000	13694000	9350094	13785010	17463000	11706000	15.1	159.31		123.006	-0.469976	0.0325323	no	up
DSC1	Desmocollin-1	3	3	0.401062	0.639547	0.510726	2142201	532858	3094800	7289498	2854731	1384080	270914	1636800	4.7	99.986
DSC2	Desmocollin-2	12	11	0.359792	0.608079	0.635179	30000000	56504990	38314000	31868010	7123696	34371010	54188970	25391990	14.4	99.961		64.369	-0.217053	0.567524	no	up
DSCC1	Sister chromatid cohesion protein DCC1	5	5	0.245131	0.493992	0.701468	9663095	4937403	5854403	11645000	3542401	8668998	5370002	4775599	13.7	44.825		46.4872	0.0555857	0.91265	no	down
DSCR3	Down syndrome critical region protein 3	3	3	0.115482	0.318281	0.620681	5374498	13285010	6333896	5546400	3245100	3636499	6117003	5157099	13.1	33.01
DSE	Dermatan-sulfate epimerase	5	5	0.032205	0.165616	2.35169	2701201	1655899	2548100	783852	5620504	4028701	3698899	3262500	5.8	109.77		67.3872	1.23975	7.87742e-08	yes	down
DSEL	Dermatan-sulfate epimerase-like protein	4	4	0.94778	0.981113	1.02106	3055200	766844	1823399	1755799	1689840	2071799	1852599	1257000	4	139.24
DSG1	Desmoglein-1	4	4	0.765751	0.88952	0.931924	1235200	1223857	1169093	1172845	1613301	1489599	1089800	596962	5.9	113.75
DSG2	Desmoglein-2	39	39	0.0141784	0.110425	0.801143	613529900	698120300	701990000	674399900	459099900	545660400	553860200	602039600	53.3	122.29		289.494	0.122123	0.608364	no	down
DSN1	Kinetochore-associated protein DSN1 homolog	7	7	0.383872	0.624893	0.646246	4764399	12116010	7866204	9274698	1489800	7348300	7178702	9346794	28.7	40.067		17.3198	0.240187	0.73297	no	down
DSP	Desmoplakin	129	52	0.00737991	0.0778271	1.23701	138180000	127980000	139149900	136460000	155369900	153699900	189990000	173300000	46.3	331.77		506.71	0.177998	0.407491	no	down
DST	Dystonin	136	89	0.427863	0.665664	1.02545	76735960	72737000	72419020	70679990	76007980	72352020	72026960	79754020	22.6	860.65		334.584	-0.0376253	0.916494	no	up
DSTN	Destrin	8	3	0.318989	0.568894	0.775449	3773898	1475600	2667801	2045299	2168600	1604399	1372500	2300799	58.2	18.506		82.8748	-0.388242	0.179828	no	up
DTD1	D-tyrosyl-tRNA(Tyr) deacylase 1	5	5	0.123164	0.33397	2.10716	41659970	13550000	6742404	14653990	52469010	32771980	22505000	28414020	20.6	23.384		5.83739	-0.911617	0.39014	no	up
DTL	Denticleless protein homolog	9	9	0.43129	0.668399	0.901581	8193396	7373505	6758200	10135000	6135502	6539103	9058399	7522999	13.7	79.467		96.8956	-0.0558995	0.899659	no	up
DTNA	Dystrobrevin alpha	12	6	0.000931291	0.0399685	0.361877	6929599	5288702	5712097	3485000	2096401	1557500	1706799	2245000	21.5	83.9		8.94469	-0.440293	0.636331	no	up
DTNB	Dystrobrevin beta	11	5	0.0985413	0.291005	3.11306	4425900	4443102	665763	564455	4757198	6714002	5251503	4137800	23.9	71.355		25.8245	0.877834	0.0298795	no	down
DTNBP1	Dysbindin	2	2	0.807038	0.914612	1.19751	705458	220799	2327101	3161000	1581821	425662	1972000	1774599	8.3	39.493		7.27654	0.277838	0.805408	no	down
DTWD1	DTW domain-containing protein 1	2	2	0.340219	0.58834	0.809934	1260100	766490	1187201	1492501	751610	1119000	695783	1258500	7.2	35.248		11.7982	1.06937	0.0923966	no	down
DTWD2	DTW domain-containing protein 2	2	2	0.725294	0.870385	0.750735	2524000	643879	379608	727490	2426301	1533200	188560	203240	16.1	33.415		13.709	-0.496495	0.464198	no	up
DTX2	Probable E3 ubiquitin-protein ligase DTX2	5	5	0.720101	0.867495	1.21401	2138401	521404	1764399	526761	1042206	788232	798826	3430102	14.8	67.246		38.12	-0.389433	0.411518	no	up
DTYMK	Thymidylate kinase	10	10	0.0617282	0.223329	1.27867	93387030	93843980	71135970	98054020	127420000	127260100	91578970	110040000	45.3	23.819		51.9073	-0.0579064	0.912349	no	up
DUS1L	tRNA-dihydrouridine(16/17) synthase [NAD(P)(+)]-like	6	6	0.0883135	0.275307	0.847893	6607303	5736701	5326503	5596998	5939599	4874799	4380199	4605103	19.5	53.23		95.297	-0.500084	0.0398139	no	up
DUS2	tRNA-dihydrouridine(20) synthase [NAD(P)+]-like	16	8	0.790145	0.904402	0.918148	17476010	16321000	16961990	5073700	13637000	11204000	10682000	10688010	41.6	55.05		21.9774	-0.353937	0.525227	no	up
DUS3L	tRNA-dihydrouridine(47) synthase [NAD(P)(+)]-like	10	8	0.160506	0.386099	0.784081	7988203	9369695	7307803	8483004	8859598	5297001	4893402	7636596	20.8	72.593		62.7761	-0.0837769	0.853389	no	up
DUSP11	RNA/RNP complex-1-interacting phosphatase	4	4	0.00122456	0.0408947	0.162282	2576576	6909300	4416303	3608502	677048	1300431	515306	433686	14.9	43.71		20.0324	-0.229813	0.727143	no	up
DUSP12	Dual specificity protein phosphatase 12	8	8	0.813255	0.91817	0.860362	10778990	11795000	10868000	1124400	6157500	3097399	5408798	8252198	29.1	37.687		24.3084	0.587845	0.19502	no	down
DUSP14	Dual specificity protein phosphatase 14	2	2	0.539304	0.755062	0.687002	987070	1250100	284373	3094604	1110545	1008322	296139	729435	18.2	22.255
DUSP16	Dual specificity protein phosphatase 16	2	2	0.189428	0.425581	0.797904	813120	1157600	785140	728120	743662	844570	498450	696680	3.8	73.101		83.802	0.911969	7.06877e-05	no	down
DUSP23	Dual specificity protein phosphatase 23	6	6	0.178871	0.412739	0.80756	12877990	10269000	8704002	10868000	10206010	9878097	6172399	8549896	44	16.588		19.4266	-0.912291	0.0749549	no	up
DUSP3	Dual specificity protein phosphatase 3	5	5	0.363778	0.611076	0.837653	21423000	23620000	16521010	17124000	10874010	15389010	18276010	23045000	34.6	20.478		16.7424	-0.568206	0.320828	no	up
DUSP6	Dual specificity protein phosphatase 6	4	4	0.180215	0.414391	2.82777	468136	604081	978582	2310700	467824	5221402	2740499	6107799	18.9	42.319		135.329	1.60134	7.12098e-13	yes	down
DUT	Deoxyuridine 5-triphosphate nucleotidohydrolase, mitochondrial	10	10	0.0748808	0.250517	0.717772	52533980	68717030	56514030	69003980	36177020	41611970	37711990	65818970	48	26.563		84.0054	-0.0663944	0.874572	no	up
DVL1P1	Putative segment polarity protein dishevelled homolog DVL1P1;Segment polarity protein dishevelled homolog DVL-1	5	2	0.669917	0.835452	1.21681	1888381	1135095	840555	1412300	2553371	2048601	461844	2309100	8.8	73.253
DVL2	Segment polarity protein dishevelled homolog DVL-2	17	13	0.265794	0.518778	0.820522	14090990	16737010	17844990	14984990	19356000	13689010	9496200	11361000	29.3	78.947		83.3758	-0.00275799	0.996742	no	up
DVL3	Segment polarity protein dishevelled homolog DVL-3	7	3	0.998625	0.99915	1.00032	1968299	3915498	2457659	3347902	2899301	3085600	2162001	3282801	13.8	78.054		95.4192	-0.397795	0.112618	no	up
DXO	Decapping and exoribonuclease protein	1	1	0.0334529	0.169398	1.80272	479799	819320	501380	582740	714750	1025368	982847	1684022	5.1	44.928
DYM	Dymeclin	4	4	0.334024	0.583022	1.99635	6441100	1271800	1058244	1008572	4483303	4013502	8798806	877146	5.1	75.847		61.9803	0.0492233	0.914953	no	down
DYNC1H1	Cytoplasmic dynein 1 heavy chain 1	236	15	0.145951	0.364077	1.28366	158450000	175150000	148880000	170269900	276060100	250180100	144889900	190889900	53.3	532.4		1333.05	0.21983	0.115848	no	down
DYNC1I2	Cytoplasmic dynein 1 intermediate chain 2	21	21	0.0198268	0.130873	1.13338	198799900	181760100	176650000	174229900	196539900	204909900	204429900	222889900	38.4	71.456		96.286	0.157025	0.634163	no	down
DYNC1LI1	Cytoplasmic dynein 1 light intermediate chain 1	19	5	0.870344	0.945284	1.02413	30783990	28225020	28628000	27846990	32304000	19838010	31652990	37564000	42.4	56.578		57.7859	0.238363	0.513732	no	down
DYNC1LI2	Cytoplasmic dynein 1 light intermediate chain 2	16	15	0.48479	0.71171	1.0607	46132980	48355030	59058970	58443030	52106990	57805000	51502980	62826960	46.7	54.099		56.9946	-0.142205	0.741703	no	up
DYNC2H1	Cytoplasmic dynein 2 heavy chain 1	34	13	0.450122	0.683789	1.1485	3788800	6738599	6013198	8294703	6214699	6566705	7193199	7547596	9	492.62		43.6746	0.29423	0.472133	no	down
DYNC2LI1	Cytoplasmic dynein 2 light intermediate chain 1	2	2	0.410577	0.650192	1.35869	1286200	384596	692052	1347570	1311001	687254	1598600	1091500	6.3	39.624		4.46905	0.840887	0.490643	no	down
DYNLL1	Dynein light chain 1, cytoplasmic;Dynein light chain 2, cytoplasmic	4	4	0.438526	0.673363	0.869091	12747000	17137990	21283990	14404000	16486990	13708000	17198010	9830401	57.3	10.366		106.029	0.200382	0.524259	no	down
DYNLRB1	Dynein light chain roadblock-type 1;Dynein light chain roadblock-type 2	5	5	0.0400331	0.184827	1.234	42947970	38395990	32864010	33209010	50685970	44258000	40061010	46436980	60.4	10.921		26.4192	0.334496	0.572897	no	down
DYNLT1	Dynein light chain Tctex-type 1	3	3	0.414456	0.653114	0.637519	21535000	23861990	21307000	21748010	3036299	26222990	22182990	22270000	49.6	12.452		10.7961	0.549647	0.490115	no	down
DYRK1A	Dual specificity tyrosine-phosphorylation-regulated kinase 1A	8	8	0.233721	0.478916	0.725894	3066202	2465799	4962002	6256099	2495502	3123599	3719299	2247699	11.8	85.583		63.697	-0.25258	0.503162	no	up
DYSF	Dysferlin	34	33	0.977727	0.990978	0.997717	23843010	21111000	26071000	24710000	25339000	24233000	19771010	26467010	20.8	237.29		37.6995	-0.317484	0.502513	no	up
DZIP3	E3 ubiquitin-protein ligase DZIP3	10	8	0.064469	0.228226	0.577667	2815801	2607000	2764400	3752301	892535	2335099	1713800	2373899	9.8	138.6		46.8933	0.323355	0.41297	no	down
E2F4	Transcription factor E2F4	6	4	0.918931	0.967928	0.976083	2619701	2211801	2038300	2568400	2884002	1333900	1970601	3632098	22.8	43.96		83.6748	-0.181371	0.61217	no	up
E2F6	Transcription factor E2F6	4	4	0.539344	0.754742	0.841197	1497001	3057200	2836699	2329900	1074564	2144701	2874200	2286501	20.3	31.844		12.0399	-0.5326	0.463582	no	up
EAF1	ELL-associated factor 1	4	3	0.128641	0.341161	0.594481	1881399	2141700	3541802	3019601	769324	1422101	2522199	1950500	23.9	29.042		21.458	-0.430155	0.432189	no	up
EAPP	E2F-associated phosphoprotein	2	2	0.705587	0.859201	1.09663	2013999	1810600	2334000	2264600	1223200	2299801	3420999	2896501	10.5	32.762		15.3634	0.470355	0.473998	no	down
EARS2	Probable glutamate--tRNA ligase, mitochondrial	17	17	0.00333969	0.0579	0.693403	80876030	101760000	104740000	87489030	57112960	68128950	63104000	71003960	39.2	58.688		66.8668	-0.616263	0.0205217	no	up
EBAG9	Receptor-binding cancer antigen expressed on SiSo cells	3	3	0.130745	0.342535	0.835591	1570300	1710499	1639999	1642099	1354800	1053022	1717000	1439601	28.2	24.377		8.97258	0.218873	0.836501	no	down
EBNA1BP2	Probable rRNA-processing protein EBP2	17	17	0.980882	0.992894	1.00275	278110000	293120200	394249800	317060100	292390200	267419900	374490100	351840100	49.3	34.852		75.5311	-0.882798	0.00024049	no	up
EBP	3-beta-hydroxysteroid-Delta(8),Delta(7)-isomerase	3	3	0.244281	0.49288	0.864505	36949010	39741020	42526980	36099000	42665010	26101000	36699990	30808990	16.5	26.352		30.7135	0.425257	0.39718	no	down
ECD	Protein SGT1	11	11	0.955806	0.984623	0.991202	10315000	7674804	10211000	13984000	10196000	9167504	8816901	13240000	22	72.757		63.2338	-0.0336434	0.942283	no	up
ECE1	Endothelin-converting enzyme 1	15	15	0.791742	0.904746	0.978094	16668990	22318010	21710000	23441990	20079000	21038000	19187010	21379010	24.5	87.163		41.0665	0.258891	0.551275	no	down
ECH1	Delta(3,5)-Delta(2,4)-dienoyl-CoA isomerase, mitochondrial	16	16	0.0658024	0.23188	0.831927	130550000	111340000	111350000	141480000	108619900	106390000	86611050	109590000	64.6	35.816		32.584	-0.187053	0.729298	no	up
ECHDC1	Ethylmalonyl-CoA decarboxylase	14	14	0.0193653	0.129668	0.57291	98175040	141410100	109710000	101369900	40737010	70637960	69553990	83105970	58.6	33.698		57.5377	-0.558498	0.0667184	no	up
ECHDC3	Enoyl-CoA hydratase domain-containing protein 3, mitochondrial	6	6	0.0157769	0.117046	0.565437	18927000	12822000	22072000	13971000	8418405	13009000	7748495	9014697	31.7	32.633		15.3761	0.258517	0.738161	no	down
ECHS1	Enoyl-CoA hydratase, mitochondrial	16	11	0.590916	0.791159	0.938825	213040100	179510000	171770100	177300000	213939900	194939900	137630100	157629900	43.1	31.387		84.8948	0.0770262	0.84439	no	down
ECI1	Enoyl-CoA delta isomerase 1, mitochondrial	6	6	0.275755	0.528976	0.91881	134380000	179049900	173220000	147090000	137520000	144660000	145340000	151110000	21.2	32.816		91.941	0.20193	0.517006	no	down
ECI2	Enoyl-CoA delta isomerase 2, mitochondrial	13	11	0.000299338	0.0284	1.76197	37152980	36890000	47803990	47594000	73987960	74519050	77570020	70273010	47.2	43.585		42.4352	0.734776	0.0229323	no	down
ECM29	Proteasome-associated protein ECM29 homolog	64	21	0.740988	0.878779	1.03752	160380100	159620100	193509900	218730100	174979900	195039900	161820100	227350000	46.7	204.29
ECSIT	Evolutionarily conserved signaling intermediate in Toll pathway, mitochondrial	8	8	0.204529	0.443227	0.854739	31724000	27222990	39252000	32128990	22154000	28637010	32668980	28047990	28.5	49.148		49.1365	-0.0818698	0.879234	no	up
ECT2	Protein ECT2	23	23	0.210131	0.451705	0.762801	30355000	42965980	43874020	39845020	18006000	30715010	38952020	35833000	28.8	103.5		118.379	-0.263181	0.317974	no	up
EDC3	Enhancer of mRNA-decapping protein 3	12	12	0.0264512	0.151213	0.800055	27735990	23648990	27399990	31589980	23542000	19970000	24151000	20487010	25.2	56.077		45.5106	0.263987	0.517841	no	down
EDC4	Enhancer of mRNA-decapping protein 4	32	32	0.0680438	0.23532	0.730856	149840000	202229900	211099900	192009900	97162960	144930000	148439900	167650000	35	151.66		130.08	-0.436971	0.0601498	no	up
EDEM3	ER degradation-enhancing alpha-mannosidase-like protein 3	9	9	0.485261	0.711639	0.807553	5211299	5934097	7027199	5714598	2106600	7238504	6414798	5399303	13.7	104.66		15.6996	-0.198559	0.828961	no	up
EDF1	Endothelial differentiation-related factor 1	8	8	0.522429	0.742233	1.65435	72836980	47453010	6514200	22212010	109590000	98641060	26864990	12899000	44.6	16.369		78.1808	-0.259792	0.520359	no	up
EDIL3	EGF-like repeat and discoidin I-like domain-containing protein 3	16	16	0.021907	0.138347	0.719547	74421970	86673020	86372980	66731970	69435020	60011970	50505970	47355990	41	53.764		57.7677	-0.470942	0.17061	no	up
EDRF1	Erythroid differentiation-related factor 1	12	12	0.0284335	0.157636	1.23622	5647900	6189101	7003604	6695901	8434804	6637202	8255996	8283295	13.7	138.53		48.1314	-0.428578	0.228864	no	up
EEA1	Early endosome antigen 1	57	41	0.00924288	0.0861365	0.772589	146010000	158390100	135209900	149709900	126660000	118860000	95828050	115610000	41.7	162.46		30.922	-0.750287	0.0782949	no	up
EED	Polycomb protein EED	10	10	0.326785	0.574992	1.07968	28470010	25080000	31468020	29110000	29493000	35421010	31073000	27381020	23.8	50.197		18.2938	0.648008	0.242115	no	down
EEF1A1	Elongation factor 1-alpha 1;Putative elongation factor 1-alpha-like 3	33	21	0.0412472	0.187328	0.611764	1976199000	2437599000	2477801000	2218501000	899110500	1257901000	1522899000	2153400000	66.9	50.14		13743.8	-0.0489045	0.796686	no	up
EEF1A2	Elongation factor 1-alpha 2	16	4	0.22329	0.467799	0.477713	7922102	6394197	3594798	2571601	8254304	2267599	1485000	877403	46.9	50.47		20.0832	1.3279	0.00262492	yes	down
EEF1AKMT4		5	5	0.462236	0.694751	0.90126	6639300	6389304	6131999	6227102	6289304	6150901	3899700	7084203	21.2	28.306		5.6523	-0.0690875	0.960818	no	up
EEF1B2	Elongation factor 1-beta	13	7	0.532201	0.750139	0.837743	172109900	310790000	295240200	116390000	131090000	201320000	149689900	229170000	78.7	24.763		366.257	-0.32567	0.170666	no	up
EEF1D	Elongation factor 1-delta	15	8	0.0901521	0.277238	0.768445	334419800	566880100	491830100	449599800	287119900	352550200	393900300	366610000	66.9	31.121		78.6891	0.0344971	0.943411	no	down
EEF1E1	Eukaryotic translation elongation factor 1 epsilon-1	11	11	0.858251	0.938289	0.979591	56901030	80305060	66324030	80113960	70779020	82845980	58674980	64982010	60.9	19.81		10.6931	0.0648061	0.950249	no	down
EEF1G	Elongation factor 1-gamma	25	7	0.517001	0.740106	0.787603	121120000	206710100	220619900	535980200	254170100	159700100	125950000	222830100	57.7	50.118		2013.51	-0.239955	0.0761938	no	up
EEF2	Elongation factor 2	59	5	0.0399069	0.184416	0.747205	1394400000	897739800	1118399000	1022299000	908839900	766290000	708399600	904299800	64.6	95.337		5979.03	0.0962601	0.655339	no	down
EEF2K	Eukaryotic elongation factor 2 kinase	8	6	0.36892	0.613975	0.801709	4270299	4222401	4358099	4185502	1767100	3763201	4093201	4991703	11.6	82.143		22.772	0.218582	0.734402	no	down
EEFSEC	Selenocysteine-specific elongation factor	9	9	0.480615	0.708277	0.872552	15462000	8751900	8441297	13050000	9537204	12499000	7551698	9598705	22	65.304		31.3025	0.12042	0.837611	no	down
EEPD1	Endonuclease/exonuclease/phosphatase family domain-containing protein 1	7	7	0.147012	0.366367	2.21749	22185010	5695997	9033702	4140202	41576010	14219990	19922010	9702600	13.5	62.402		6.35813	1.0792	0.257052	no	down
EFCAB14	EF-hand calcium-binding domain-containing protein 14	7	6	0.01629	0.118386	1.5617	2457799	1596000	2461200	1764901	3433999	3575299	3226401	2558599	20	55.031		32.2775	-0.0483139	0.936454	no	up
EFHD1	EF-hand domain-containing protein D1	3	1	0.201669	0.439426	0.836356	1212809	924594	711435	977612	706470	840121	897657	716250	14.2	26.927
EFHD2	EF-hand domain-containing protein D2	9	3	0.182382	0.416868	1.55918	15455010	8365196	8587404	9029595	33394010	13196000	12071000	11138000	34.2	26.697		15.9236	0.601472	0.306696	no	down
EFNB1	Ephrin-B1	5	5	0.000208873	0.0212766	2.98606	1404299	1154693	1767799	2079100	4595700	4965303	4107099	5055902	22	38.006		17.8584	0.346831	0.590981	no	down
EFNB2	Ephrin-B2	3	3	0.781196	0.898954	0.938735	1787690	889480	1363599	1121300	1472799	810009	1584400	998875	11.4	36.923		21.1723	-0.664134	0.188805	no	up
EFR3A	Protein EFR3 homolog A	15	14	0.134947	0.34837	0.449095	8052705	8738396	10136000	12777000	1215601	5157603	5833897	10135000	21.6	92.923		44.1084	-0.945102	0.00127646	no	up
EFR3B	Protein EFR3 homolog B	8	2	0.0143173	0.110417	0.718983	941587	835655	720922	761386	666833	662480	494130	528720	12.9	92.486		10.0343	1.06565	0.14458	no	down
EFTUD1	Elongation factor Tu GTP-binding domain-containing protein 1	27	14	0.036726	0.177735	0.842552	44474970	53155000	44602980	44142010	39120980	38000020	35636990	44276030	28.5	125.43
EFTUD2	116 kDa U5 small nuclear ribonucleoprotein component	45	44	0.298568	0.547362	1.07124	999970500	937779900	1109500000	990270500	958170200	1055800000	1214400000	1104400000	57.1	109.43		177.022	0.242028	0.275907	no	down
EGFR	Epidermal growth factor receptor	5	4	0.0771556	0.255848	1.84757	544500	986820	1407500	751510	1521101	916650	2082900	2280300	5	134.28		3.91648	2.0004	0.0795781	no	down
EGLN1	Egl nine homolog 1	4	2	0.157087	0.380417	1.75958	2113099	1560200	625187	2490001	1970499	3050199	2077001	3940998	14.1	46.02		32.2021	-0.288946	0.605108	no	up
EHBP1	EH domain-binding protein 1	15	13	0.97419	0.989588	0.993761	3978802	3080101	4779003	4471901	2660499	4086901	4073502	5766997	15.8	140.02		41.4664	0.26363	0.557694	no	down
EHD1	EH domain-containing protein 1	29	21	0.0123911	0.100758	0.769349	74474040	79170970	70789970	69396010	57511970	48481000	54126030	67241020	65.4	60.626		51.5847	-0.16548	0.693592	no	up
EHD2	EH domain-containing protein 2	9	8	0.0338719	0.169592	0.658177	4620501	4299598	4312601	5564497	2945501	2456399	2678899	4615703	17.5	61.161		10.8567	1.8679	0.00230105	yes	down
EHD3	EH domain-containing protein 3	14	4	0.336634	0.584911	1.35147	5197098	15863010	6696202	10331000	15999000	7775505	12866000	11887010	26	60.886		19.1525	0.618486	0.222662	no	down
EHD4	EH domain-containing protein 4	26	6	0.292234	0.541051	0.791377	38387000	28996000	44719010	41800000	40008020	18912990	39705980	27161980	65.2	61.174		93.9936	0.0780603	0.836501	no	down
EHHADH	Peroxisomal bifunctional enzyme;Enoyl-CoA hydratase/3,2-trans-enoyl-CoA isomerase;3-hydroxyacyl-CoA dehydrogenase	13	13	0.0242448	0.144424	0.303987	10078000	8440002	5892304	10040000	918125	5584698	3193900	2623801	24.1	79.494		5.12195	-0.175306	0.902866	no	up
EHMT1	Histone-lysine N-methyltransferase EHMT1	27	27	0.00394177	0.0578237	1.27388	60499020	57238970	66684960	55389030	74934970	69558960	80705990	80068010	25.9	141.46		232.337	-0.0157341	0.963695	no	up
EHMT2	Histone-lysine N-methyltransferase EHMT2	24	24	0.00457005	0.0595866	1.38237	50013000	51037990	68044970	58860980	76329010	76631020	82206950	77642050	23.6	132.37
EI24	Etoposide-induced protein 2.4 homolog	4	4	0.742727	0.878953	0.794794	15324000	15114000	20807000	12525010	1887700	38908010	22268990	14726010	12.9	38.964		85.3837	-0.0793363	0.846596	no	up
EIF1	Eukaryotic translation initiation factor 1	6	2	0.177027	0.410764	0.711101	27473990	21219990	40735980	41773980	14739990	25072010	22791010	30117990	63.7	12.746		114.193	-0.514287	0.0670023	no	up
EIF1AD	Probable RNA-binding protein EIF1AD	5	5	0.968792	0.987844	1.01331	11451000	4588803	7260097	6133499	6297699	11047010	3522101	10068000	32.1	19.053		7.99695	0.00667414	0.996924	no	down
EIF1AX	Eukaryotic translation initiation factor 1A, X-chromosomal;Eukaryotic translation initiation factor 1A, Y-chromosomal;Eukaryotic translation initiation factor 1A	6	6	0.382985	0.623861	0.823416	195580100	205849900	135550000	154530000	113020000	227570100	100700100	149680000	58.3	16.46		39.779	-0.386176	0.397025	no	up
EIF1B	Eukaryotic translation initiation factor 1b	6	2	0.366409	0.613341	0.639693	17205010	23185000	15827000	15053000	42132000	7756305	8302998	5865001	63.7	12.823		21.2463	-0.267123	0.674738	no	up
EIF2A	Eukaryotic translation initiation factor 2A;Eukaryotic translation initiation factor 2A, N-terminally processed	22	16	0.114858	0.317361	0.893445	176940100	198610000	166469900	168510000	163750100	146180000	147790000	177560100	46.7	64.989		72.5657	-0.441563	0.140628	no	up
EIF2AK2	Interferon-induced, double-stranded RNA-activated protein kinase	16	16	0.113992	0.316262	1.21458	120250000	95605960	115580000	130710000	151390000	121550100	121779900	168670000	35	62.094		22.063	0.195267	0.788012	no	down
EIF2AK3	Eukaryotic translation initiation factor 2-alpha kinase 3	13	8	0.194494	0.431722	0.85961	14587000	12473000	12480000	10432000	10327000	13353000	10018010	9362501	18.1	125.21		39.8952	-0.71948	0.0322235	no	up
EIF2AK4	Eukaryotic translation initiation factor 2-alpha kinase 4	38	38	0.450781	0.684398	0.945662	61359960	60319960	63934020	71570000	59762020	56933990	55540010	71671980	26.6	186.91		279.218	-0.161048	0.434858	no	up
EIF2B1	Translation initiation factor eIF-2B subunit alpha	11	10	0.284937	0.536879	0.90801	43045980	46304990	44359990	47153010	32643980	41643010	44860000	46475000	35.1	33.712		37.7023	0.0234869	0.967607	no	down
EIF2B2	Translation initiation factor eIF-2B subunit beta	10	6	0.0657203	0.231748	0.604739	27826010	23646990	20692010	40819980	10731010	15313000	19147000	23624990	33.3	38.989		29.1009	-0.246356	0.66548	no	up
EIF2B3	Translation initiation factor eIF-2B subunit gamma	15	15	0.0196224	0.13017	0.746898	58974000	63209960	45739990	66183010	42913010	48404020	39515000	42786000	36.3	50.24		24.9583	0.0763547	0.908568	no	down
EIF2B4	Translation initiation factor eIF-2B subunit delta	16	16	0.00440043	0.0592914	0.720656	60816030	65267000	68936970	72054960	43007980	47111020	45463030	57730990	42.8	57.557		46.6052	0.292573	0.453129	no	down
EIF2B5	Translation initiation factor eIF-2B subunit epsilon	12	12	0.113245	0.315334	0.801053	96817000	72034960	87928980	87854030	87083980	71929980	66695980	53099020	21.2	80.379		58.6898	-0.41757	0.180579	no	up
EIF2D	Eukaryotic translation initiation factor 2D	17	17	0.000125577	0.0162353	0.61213	56502000	61530960	62130970	60939980	33208000	35619980	36760980	42502980	40.4	64.706		43.3768	-0.338179	0.376451	no	up
EIF2S1	Eukaryotic translation initiation factor 2 subunit 1	20	1	0.413815	0.652662	0.640437	28745000	29113000	28362000	40442030	4592699	30180010	27320020	42643970	56.8	36.112		68.124	-0.738621	0.00388768	no	up
EIF2S2	Eukaryotic translation initiation factor 2 subunit 2	28	28	0.160955	0.386667	0.804254	266020000	300950200	304959800	305440000	173200100	208310000	286570000	301760200	69.1	38.388		166.994	0.181658	0.566572	no	down
EIF2S3	Eukaryotic translation initiation factor 2 subunit 3;Putative eukaryotic translation initiation factor 2 subunit 3-like protein	19	1	0.753628	0.882932	0.655199	818690	12831000	41982980	37483980	934379	2861900	31309000	36387020	51.5	51.109		243.611	-0.216575	0.341508	no	up
EIF3A	Eukaryotic translation initiation factor 3 subunit A	84	21	0.0663662	0.233043	0.842513	350610000	325940000	288089900	342790200	278020000	302569900	229280000	294820100	55.1	166.57		643.988	-0.198406	0.332063	no	up
EIF3B	Eukaryotic translation initiation factor 3 subunit B	41	11	0.048487	0.201091	0.847151	301190200	320060000	324109900	302320000	231980000	244120100	278669900	308270000	58.1	92.48		518.075	-0.237846	0.179436	no	up
EIF3C	Eukaryotic translation initiation factor 3 subunit C;Eukaryotic translation initiation factor 3 subunit C-like protein	34	34	0.242085	0.489517	0.925707	534420000	488800300	452450100	518750000	524670000	430100200	463509900	430450000	39.8	105.34		26.8952	-0.0957851	0.883749	no	up
EIF3D	Eukaryotic translation initiation factor 3 subunit D	22	1	0.541948	0.757191	0.614177	837700	2152501	4087101	9511504	582829	2163800	1044401	7572603	46.4	63.972		242.4	-0.00526106	0.985925	no	up
EIF3E	Eukaryotic translation initiation factor 3 subunit E	21	21	0.367656	0.612907	0.880013	415410100	364369900	363209800	436580300	474030300	260300100	344340000	338789900	52.4	52.22
EIF3G	Eukaryotic translation initiation factor 3 subunit G	23	5	0.0949883	0.286342	0.834477	137989900	122079900	99629020	100970000	93868050	90241050	109060000	88949000	65	35.611		177.832	-0.201881	0.419664	no	up
EIF3H	Eukaryotic translation initiation factor 3 subunit H	21	7	0.724543	0.870405	0.961471	215530000	202970000	214819900	233359900	282700200	191620100	185230000	186770100	62.5	39.93		223.537	-0.123621	0.670304	no	up
EIF3I	Eukaryotic translation initiation factor 3 subunit I	16	2	0.079631	0.260964	0.292066	5718603	9570195	8179305	2203500	580210	1142300	5717998	1893899	61.8	36.501		160.645	-0.0818095	0.796686	no	up
EIF3J	Eukaryotic translation initiation factor 3 subunit J;Eukaryotic translation initiation factor 3 subunit J-A;Eukaryotic translation initiation factor 3 subunit J-B	11	11	0.0591316	0.219463	0.801722	183680000	134380000	153170100	152700000	108860000	124560000	116650000	150789900	38.8	29.062		28.5606	-0.722323	0.097128	no	up
EIF3K	Eukaryotic translation initiation factor 3 subunit K	7	7	0.752978	0.883016	1.08466	62017960	84223010	80671000	83964970	155990100	73828000	50170020	84757060	38.1	25.059		138.745	-0.390977	0.0531601	no	up
EIF3L	Eukaryotic translation initiation factor 3 subunit L	27	27	0.0365588	0.177708	0.873471	649340000	812310500	769810400	768860400	640899800	636659600	659839900	674969900	53.5	66.726		652.385	-0.107482	0.572581	no	up
EIF3M	Eukaryotic translation initiation factor 3 subunit M	19	19	0.0454259	0.195611	0.685069	99216940	148000000	127130100	166500000	85737000	88951000	74646050	120260000	61.5	42.502		182.423	-0.382417	0.0607074	no	up
EIF4A1	Eukaryotic initiation factor 4A-I	34	20	0.041332	0.187162	0.753076	1832400000	2016700000	1673300000	2038701000	1160101000	1309300000	1440800000	1852699000	75.4	46.153		1415.72	-0.428879	0.000366397	no	up
EIF4A2	Eukaryotic initiation factor 4A-II;Eukaryotic initiation factor 4A-II, N-terminally processed	27	13	6.07679e-05	0.0178182	0.653609	230930100	209709900	209020100	197479900	134129900	150320000	134260000	134770000	58.5	46.402		283.381	-0.382327	0.051261	no	up
EIF4A3	Eukaryotic initiation factor 4A-III;Eukaryotic initiation factor 4A-III, N-terminally processed	28	23	0.746023	0.879868	1.01679	531890200	615379600	589100200	659420400	622669800	600739600	629410200	577250400	59.6	46.871		108.6	-0.243897	0.383588	no	up
EIF4B	Eukaryotic translation initiation factor 4B	37	37	0.00186928	0.0465567	0.831195	647840300	645159900	625030300	589870200	492650100	501820300	552860200	538150000	53.8	69.15		847.827	0.107356	0.672306	no	down
EIF4E	Eukaryotic translation initiation factor 4E	10	3	0.386995	0.627382	0.911279	3094399	3888498	4557201	3914800	3523801	3199399	3191899	4113800	43.8	25.097		59.297	-0.301874	0.407022	no	up
EIF4E2	Eukaryotic translation initiation factor 4E type 2	12	12	0.0981152	0.290908	0.808255	19890010	28119020	25574990	24537980	16833000	21027990	23906990	17701000	55.9	28.362		50.6388	0.0536143	0.912961	no	down
EIF4EBP2	Eukaryotic translation initiation factor 4E-binding protein 2	3	3	0.39929	0.637802	2.9802	18769000	585000	600050	619785	46629980	3897402	1601600	1106649	24.2	12.939		41.1541	-0.030847	0.959048	no	up
EIF4ENIF1	Eukaryotic translation initiation factor 4E transporter	15	8	0.149675	0.369631	0.79875	7003196	9710903	9935201	9713895	5938398	7259502	6408203	9670699	23.4	108.2		33.7917	-0.18854	0.718813	no	up
EIF4G1	Eukaryotic translation initiation factor 4 gamma 1	63	25	0.305199	0.553594	1.09499	422340000	390240200	445429900	482089800	507070200	389559800	525920000	489749900	40.8	175.49		959.008	-0.452206	0.00333966	no	up
EIF4G2	Eukaryotic translation initiation factor 4 gamma 2	38	38	1.525e-06	0	3.52382	93844970	90070960	93076050	97445980	352470000	271069900	347350000	356190000	46.6	102.36		280.34	2.45611	9.08523e-48	yes	down
EIF4G3	Eukaryotic translation initiation factor 4 gamma 3	35	17	0.00730982	0.0770245	1.35999	24156010	19331990	18841990	18295010	27095990	27633000	24351990	30202000	25.7	176.65		166.051	0.0282155	0.935433	no	down
EIF4H	Eukaryotic translation initiation factor 4H	14	14	0.4166	0.654592	1.11781	446449900	279970100	310459800	396859900	460339800	329660100	392830000	403319800	54.8	27.385		129.74	-0.300875	0.256946	no	up
EIF5	Eukaryotic translation initiation factor 5	18	18	0.115473	0.318385	0.760907	271269900	303300000	296919800	294010100	163799900	225879900	198410000	327979900	33.6	49.222		151.308	-0.201997	0.529691	no	up
EIF5A	Eukaryotic translation initiation factor 5A-1;Eukaryotic translation initiation factor 5A-1-like	14	14	0.390743	0.630346	0.909254	847130200	788760300	680140300	939080100	626790300	808019600	664260000	867070500	88.3	16.832		208.955	-0.238897	0.279313	no	up
EIF5B	Eukaryotic translation initiation factor 5B	52	30	0.0436381	0.19368	0.870594	213740000	208440100	198120100	223410000	177720000	195400000	162440000	200820000	37.8	138.83		177.803	-0.385	0.204775	no	up
EIF6	Eukaryotic translation initiation factor 6	6	6	0.470791	0.701407	0.719156	218160000	180910000	708399600	95921970	152760000	152860000	217579900	141190000	46.9	26.599		70.7901	-0.383419	0.204569	no	up
ELAC2	Zinc phosphodiesterase ELAC protein 2	27	27	0.00868091	0.0835815	0.730267	182890100	194180000	189190000	233770000	131160000	173070100	136930000	143710000	42.7	92.218		155.246	-0.166882	0.577591	no	up
ELAVL1	ELAV-like protein 1	18	3	0.714758	0.86374	0.838683	28535990	106020000	91551010	87695980	39113020	27559990	109470100	101840000	62.6	36.091		116.296	-0.0768132	0.820649	no	up
ELAVL2	ELAV-like protein 2;ELAV-like protein 4	9	8	0.43751	0.672922	1.13873	20001000	12158990	19533000	21265990	24120010	20199000	15939990	21872000	29.8	39.503		28.1655	-0.974306	0.0102552	no	up
ELF1	ETS-related transcription factor Elf-1	9	9	0.273776	0.528066	0.729449	3386999	3598802	5180798	2128000	1739199	2200699	4211402	2360399	26.7	67.497		11.6464	-0.439999	0.61217	no	up
ELF2	ETS-related transcription factor Elf-2	13	13	0.334869	0.583888	0.894572	12212000	14302990	18173990	17080990	12208990	13005000	13739990	15917000	39.1	63.966		52.8951	-0.430981	0.196605	no	up
ELL	RNA polymerase II elongation factor ELL	12	12	0.835749	0.927462	1.07623	3070600	2971901	10100010	5856903	3909700	4257300	5140401	8464195	21.1	68.264		26.8292	-0.301674	0.571243	no	up
ELMO1	Engulfment and cell motility protein 1	7	6	0.0155596	0.117003	3.24107	687500	373777	385206	1133100	2168101	1659801	3222999	1067101	12.4	83.829		5.29747	0.8734	0.430262	no	down
ELMO2	Engulfment and cell motility protein 2	15	14	0.755405	0.883985	1.02567	10794000	10322000	12660010	12761000	10639000	10967000	12925990	13208000	30.8	82.614		22.3375	0.616782	0.181326	no	down
ELMO3	Engulfment and cell motility protein 3	10	10	0.238917	0.484655	0.714155	5318600	4229698	5292101	3782299	1628399	3515198	4250102	4814497	19.9	81.466		19.2771	0.102366	0.894275	no	down
ELMOD2	ELMO domain-containing protein 2	5	5	0.0708021	0.242028	1.22987	21398010	17968000	25194990	25834010	29534010	29708010	25418020	25673000	19.5	34.96		11.6612	0.699091	0.316942	no	down
ELMSAN1	ELM2 and SANT domain-containing protein 1	12	12	0.242385	0.490005	1.13636	5257700	5963101	4873897	5504898	6429104	5086602	7663904	5596702	17.4	114.99		20.3664	-0.509515	0.342873	no	up
ELOVL1	Elongation of very long chain fatty acids protein 1	2	2	0.775254	0.894964	1.04941	16930000	11855990	12356000	13415000	16066000	17073990	9327500	15770000	9	32.662		15.3788	-0.0643624	0.94017	no	up
ELOVL5	Elongation of very long chain fatty acids protein 5	4	4	0.148451	0.367519	0.428417	3604902	18706990	3049599	14776010	4922901	1937600	3884998	2762401	20.7	35.293		116.41	0.126326	0.69391	no	down
ELOVL6	Elongation of very long chain fatty acids protein 6	1	1	0.929505	0.973637	0.972328	815280	2119299	2376701	2059300	1094860	1454800	1910199	2484300	6	31.376		80.8558	0.12048	0.752328	no	down
ELP2	Elongator complex protein 2	13	13	0.973573	0.989292	0.991012	21976000	13774000	23189990	32381010	16790000	29610020	14400990	30621990	17.4	92.499		108.329	0.264545	0.322444	no	down
ELP3	Elongator complex protein 3	13	13	0.302988	0.550645	1.15951	28825990	39579000	39270020	42294010	33051020	42487020	45840970	53209980	30.7	62.258		21.2431	0.0632332	0.933391	no	down
ELP4	Elongator complex protein 4	7	7	0.71006	0.861205	1.06256	9828894	11205000	9877300	6476100	12695990	10107990	8164104	8571105	20.8	46.587		16.2245	-0.0257008	0.976212	no	up
ELP5	Elongator complex protein 5	3	3	0.282878	0.535521	1.25086	3497998	1618000	2772800	3253201	4001998	3539401	2834802	3112699	11.7	34.841		36.2778	-0.111233	0.838524	no	up
ELP6	Elongator complex protein 6	6	6	0.296547	0.545432	0.691441	7185196	8670099	5424797	6997902	1928166	7187505	5923899	6584204	27.1	29.793		27.3614	0.420942	0.372625	no	down
EMB	Embigin	5	5	0.00063312	0.0337778	1.73443	4111299	3735102	3773299	3045501	7350000	6377498	5649700	6030099	18.7	36.881		19.1606	-0.0111607	0.989438	no	up
EMC1	ER membrane protein complex subunit 1	29	15	0.192935	0.430693	0.900272	71339020	75854980	88963000	86436030	65888970	67477010	76035010	80859030	34.1	111.76		91.4428	-0.302703	0.251632	no	up
EMC10	ER membrane protein complex subunit 10	4	4	0.868914	0.944998	1.14303	8200397	682050	16966010	13466000	7654203	4647501	4820503	12720000	16	27.347		62.0645	-0.0563515	0.907045	no	up
EMC2	ER membrane protein complex subunit 2	6	2	0.454174	0.687613	1.67624	7600698	831204	11530000	10104000	5132402	9718596	12371000	9416799	24.9	34.833		11.7484	-0.39559	0.64594	no	up
EMC3	ER membrane protein complex subunit 3	9	9	0.177317	0.410847	0.830534	20862010	33773000	34318020	27152000	25332000	24738020	22773990	21888000	42.1	29.952		21.8158	-0.0643876	0.928294	no	up
EMC4	ER membrane protein complex subunit 4	4	4	0.873006	0.946334	1.05568	4193101	16429010	6054104	12656990	8982801	8000305	10963000	8321504	24.6	20.086		37.8525	-0.624425	0.0858692	no	up
EMC7	ER membrane protein complex subunit 7	7	7	0.629353	0.811391	0.875032	24028990	42826980	46853000	61525030	40645020	22142000	39077000	49453010	43.8	26.47		27.8805	-0.394173	0.409802	no	up
EMC8	ER membrane protein complex subunit 8	6	6	0.00423886	0.0585391	1.51681	21458010	26283000	22119990	24484000	43994020	29842000	34063980	36153020	30.5	23.773		47.9049	-0.240197	0.553588	no	up
EMC9	ER membrane protein complex subunit 9	1	1	0.00509411	0.0634133	3.37275	1056100	315514	583370	914530	2641699	2330701	1861315	2007300	6.2	23.061		16.1686	-0.360508	0.634517	no	up
EMD	Emerin	13	12	0.00327747	0.0578628	0.74408	192309900	212229900	184710100	161659900	132200100	145020000	146510100	133000000	61.4	28.994		73.6075	0.0290943	0.951701	no	down
EMG1	Ribosomal RNA small subunit methyltransferase NEP1	14	14	0.628972	0.811661	0.949467	157589900	186240000	229650100	179469900	161939900	155369900	191310000	204230000	67.6	26.72		38.2636	-0.0319323	0.955812	no	up
EMILIN3	EMILIN-3	4	4	0.625304	0.809555	1.31843	1034917	1478277	993630	1038344	2227100	3620099	1848201	320073	8.6	82.646		12.095	2.23645	0.000186879	yes	down
EML1	Echinoderm microtubule-associated protein-like 1	7	3	0.344453	0.592416	0.786942	1589200	1605600	1696899	2081300	1980300	708658	1570201	1568388	9.6	89.86		20.8498	0.259273	0.68537	no	down
EML3	Echinoderm microtubule-associated protein-like 3	9	9	0.58823	0.78962	0.913323	3824198	3781799	5455897	2961499	3609499	3077602	4674003	3131600	14.5	95.196		43.7619	0.545726	0.106107	no	down
EML4	Echinoderm microtubule-associated protein-like 4	21	21	0.211931	0.453876	1.10085	86806040	94980950	100950000	108649900	111270100	98494980	99683030	121570000	25.5	108.91		110.246	0.074866	0.843585	no	down
EMSY	Protein EMSY	27	12	0.141957	0.357865	1.13635	10244010	13220010	11533990	10902000	14685000	11418000	13370010	12666000	29.6	141.47		40.0046	0.259002	0.571964	no	down
ENAH	Protein enabled homolog	30	10	0.0222533	0.139634	0.597698	135180100	110110000	147399900	92522000	92769050	55566010	58277990	86236970	45.7	66.509		228.951	-0.282587	0.22369	no	up
ENDOD1	Endonuclease domain-containing 1 protein	3	3	0.348351	0.596897	0.651977	298970	664902	1720970	908710	857040	471828	308370	450460	7.6	55.016
ENDOG	Endonuclease G, mitochondrial	6	6	0.0439363	0.194139	1.37512	9264097	14611010	14088000	9646106	16752990	17017990	15610990	14778000	28.6	32.62		38.5998	0.102936	0.84954	no	down
ENGASE	Cytosolic endo-beta-N-acetylglucosaminidase	2	2	0.854763	0.935779	0.94366	595970	831758	844230	2316732	840787	850650	922060	1165800	5	83.986		21.1611	0.312936	0.608801	no	down
ENO1	Alpha-enolase	34	16	0.482531	0.709872	1.08398	2189300000	1888900000	1348900000	1790300000	1988199000	1833101000	1797900000	2104200000	74.2	47.168		1971.07	0.0331482	0.890851	no	down
ENO2	Gamma-enolase	15	12	0.417825	0.654182	0.825613	83585950	80602980	55702960	60903980	37696990	70944000	45190010	87872030	61.1	47.268		82.6348	0.562202	0.131011	no	down
ENO3	Beta-enolase	10	6	0.0524562	0.206528	0.595288	6974000	4754199	2905199	3124202	2320800	2365500	2252599	3055899	31.3	47.024		10.8857	-0.710054	0.325014	no	up
ENOPH1	Enolase-phosphatase E1	9	9	0.119278	0.326986	0.810325	34741980	45012020	39655990	43856980	25200990	39469000	31811020	37061000	51.7	28.932		54.8948	-0.276657	0.437687	no	up
ENPP1	Ectonucleotide pyrophosphatase/phosphodiesterase family member 1;Alkaline phosphodiesterase I;Nucleotide pyrophosphatase	18	13	0.00201625	0.0478829	0.53872	41680030	49477010	57341000	38807010	24938990	27161010	28665000	19906000	26.4	104.92		31.1649	-0.341709	0.460057	no	up
ENPP4	Bis(5-adenosyl)-triphosphatase ENPP4	4	3	0.967367	0.987689	0.98076	1761677	2296502	1876500	1611001	1087717	6996450	1359501	1093742	9.9	51.641		5.08655	0.225755	0.873012	no	down
ENTPD6	Ectonucleoside triphosphate diphosphohydrolase 6	5	5	0.566278	0.774503	0.895534	2754000	2897201	4137598	2787701	2081100	2596701	4288902	2553901	15.3	53.245		21.888	0.175104	0.793422	no	down
ENY2	Transcription and mRNA export factor ENY2	2	2	0.993224	0.998069	1.00669	7501398	7866901	10789000	1084288	1026772	9109403	7779700	9743606	25.7	11.528		23.241	-0.203916	0.772986	no	up
EOGT	EGF domain-specific O-linked N-acetylglucosamine transferase	5	5	0.173204	0.404618	2.15335	10551010	11780000	10725010	6507297	83398970	18122000	10442000	11818000	10.1	62.01		8.85604	0.0922343	0.934025	no	down
EP300	Histone acetyltransferase p300	34	25	0.655	0.829009	0.977657	48021010	45549000	44467980	47141980	44660990	40493010	46003980	50351030	21.7	264.16		466.738	-0.454565	0.000974218	no	up
EP400	E1A-binding protein p400	56	55	0.0291456	0.158858	1.27145	79672030	75571010	93007040	77253980	104780000	98991060	123510000	88250990	26.1	343.48		314.89	0.444128	0.00828263	no	down
EPB41	Protein 4.1	27	24	0.0396115	0.183501	1.20422	58314980	49015020	51868010	58327010	73645020	67510020	64968000	56297020	40.2	97.016		54.8392	0.569755	0.08966	no	down
EPB41L2	Band 4.1-like protein 2	50	37	0.384486	0.624894	1.07584	343550200	353640200	375500000	312359800	455080100	341310100	347549800	353640200	55.4	112.59		118.82	0.193773	0.57055	no	down
EPB41L3	Band 4.1-like protein 3;Band 4.1-like protein 3, N-terminally processed	24	10	0.000254652	0.0286038	2.44579	9243996	13839000	11554000	10778000	29857990	23816980	33136990	24191010	27.7	120.68		28.1432	0.583185	0.187892	no	down
EPB41L4B	Band 4.1-like protein 4B	6	5	0.596243	0.794155	0.875421	5949698	6723400	6172603	3910098	5700201	2669501	5590800	6665200	7.7	99.711		23.2499	-0.663303	0.162738	no	up
EPB41L5	Band 4.1-like protein 5	15	14	0.00881664	0.0833439	0.767987	49520990	47249990	52108980	44702990	37340990	41542000	39074000	31281980	34.5	81.855		25.8499	0.043017	0.950464	no	down
EPC1	Enhancer of polycomb homolog 1	7	7	0.0321671	0.165673	1.3089	3414099	2584799	3787899	3157500	4612799	4099700	4498502	3641498	10.6	93.462		31.6237	-0.819466	0.0241152	no	up
EPC2	Enhancer of polycomb homolog 2	6	6	0.0897537	0.276947	2.58975	900344	1772299	3219698	360249	2865296	3033598	2988702	3204699	7.9	91.094		38.4605	-0.258228	0.572227	no	up
EPCAM	Epithelial cell adhesion molecule	11	8	0.606301	0.800061	1.12019	54899980	71641000	79088010	34262990	51405020	67880000	60337990	79707960	36.9	34.932		107.315	0.238614	0.414927	no	down
EPG5	Ectopic P granules protein 5 homolog	7	7	0.108913	0.307192	0.645685	1367099	2246401	1740499	3558502	1778900	1101000	1455800	1159500	3.8	292.48		55.5985	-0.201935	0.610156	no	up
EPHA1	Ephrin type-A receptor 1	21	11	0.572961	0.778636	1.08868	86288060	102690000	98304010	66467990	125660100	81028010	98266980	81287990	27.8	108.13		246.866	0.251713	0.315084	no	down
EPHA2	Ephrin type-A receptor 2	17	15	0.21903	0.461125	0.851088	38418990	41738980	34585020	26720010	35902000	27161980	29516020	27013010	21.2	108.27		47.007	0.400876	0.343064	no	down
EPHA4	Ephrin type-A receptor 4	6	4	0.0555824	0.21316	1.97839	1147632	1135500	1026783	376515	2133101	1667300	1299601	1669800	8	109.81		22.0537	0.149613	0.836501	no	down
EPHA7	Ephrin type-A receptor 7	9	6	0.693053	0.852227	1.07696	3263600	4552601	3912699	2641901	3597598	5526600	3575502	2906301	10.6	112.1		12.918	-0.106354	0.913673	no	up
EPHB2	Ephrin type-B receptor 2	9	6	0.752218	0.883187	1.06907	4313901	2840399	2876002	2031800	4097202	2208300	3447099	2998798	11.8	109.9		30.0671	0.271657	0.594687	no	down
EPHB3	Ephrin type-B receptor 3	8	3	0.46364	0.695329	1.46554	684439	897562	849880	1166258	2756601	2854799	398954	894689	10	110.33		7.92737	0.987071	0.280198	no	down
EPHB4	Ephrin type-B receptor 4	23	7	0.0509167	0.203519	0.701502	12288990	17976010	19621000	19408000	10025000	10493000	15131000	12799000	26.2	108.27		299.795	-0.574241	0.00346898	no	up
EPHX1	Epoxide hydrolase 1	17	16	0.733585	0.875981	1.04446	232549900	169980000	219449900	292030100	214010000	270499900	228919900	227490100	37.4	52.948		65.554	0.474048	0.134647	no	down
EPHX2	Bifunctional epoxide hydrolase 2;Cytosolic epoxide hydrolase 2;Lipid-phosphate phosphatase	5	5	0.708408	0.859999	1.06091	1826601	1340000	1780999	1437900	2236799	1949701	1319200	1380200	10.5	62.615		5.32573	2.24787	0.0226358	yes	down
EPHX3	Epoxide hydrolase 3	1	1	0.959389	0.985877	0.987398	1728899	1395101	2861499	2104401	2991671	1588800	1302501	2229999	3.1	40.908		23.6103	-0.269524	0.660627	no	up
EPM2AIP1	EPM2A-interacting protein 1	7	7	0.541547	0.756776	0.741361	1832999	2049601	2175000	4149200	1396717	2265100	654840	4943602	15.8	70.369		33.1137	0.101899	0.867769	no	down
EPN1	Epsin-1	12	11	0.185437	0.41971	1.26203	13584010	15257990	18215000	23120010	23433990	24105000	15903010	24648010	30.6	60.293		268.521	-0.454526	0.0111951	no	up
EPN2	Epsin-2	10	5	0.649839	0.825993	1.06728	3820499	6086301	5947897	4109000	4567298	4834500	5921800	5639201	24	68.481		39.5621	0.128518	0.801637	no	down
EPPK1	Epiplakin	79	66	0.0136221	0.108465	0.740001	239209900	220050100	208550100	163900000	149580000	156210100	140960000	163810100	42.1	555.65		85.09	0.197591	0.566572	no	down
EPRS	Bifunctional glutamate/proline--tRNA ligase;Glutamate--tRNA ligase;Proline--tRNA ligase	73	41	0.945281	0.980503	1.00585	456440000	575509900	513930000	504880100	436849900	518890000	509719700	603830000	52	170.59		321.16	0.0521903	0.883924	no	down
EPS15	Epidermal growth factor receptor substrate 15	24	17	0.81902	0.92004	0.973231	48713970	60358980	44007990	47766020	39169010	44870970	53351000	59137020	35.3	98.655		38.2954	-0.197204	0.678768	no	up
EPS15L1	Epidermal growth factor receptor substrate 15-like 1	35	35	0.000499574	0.0291364	0.890041	102590000	97974970	104550000	101030000	92294020	90656940	87838000	90652030	50.6	94.254		42.2249	-0.0211339	0.969986	no	up
EPS8L2	Epidermal growth factor receptor kinase substrate 8-like protein 2	9	9	0.0625264	0.224509	0.448791	51847030	44961000	98893990	74702020	18353000	26180010	20875010	69651990	17.3	80.62		20.0729	0.0890164	0.909325	no	down
EPT1	Ethanolaminephosphotransferase 1	3	3	0.369171	0.614353	1.24047	5938704	4874902	4412999	4594503	8666397	4371798	8949799	4098800	8.1	45.228
[truncated: 5,505 more rows]
