# Supplementary material for: DAP5 drives translation of specific mRNA targets with upstream ORFs in human embryonic stem cells
Source: RNA. 2022 Oct;28(10):1325–36. doi: 10.1261/rna.079194.122 (PMC9479741; doi:10.1261/rna.079194.122)
Supplement: Supplemental Material [file supp_079194.122_Supplemental_Table_S3.xlsx]

## Sheet: All Filtered uORFs
		Price prediction						uORF/CDS ratio								mean uORF/CDS ratio
symbol	transcript	ID	Location	Type	Codon	p_value	FDR	shNT1	shNT2	shNT3	shNT4	shDAP5_1	shDAP5_2	shDAP5_3	shDAP5_4	shNT	shDAP5	Type of main ORF	DAP5_activated
ABCB6	ENST00000265316	ENST00000265316_9_uORF_6	2-:219218732-219218792	uORF	TTG	3.79e-10	1.24619e-09	0.136281	0.137575	0.107339	0.100266	0.0379009	0.0928882	0.090798	0.0846457	0.120365	0.0765582	CDS	0
ABHD17B	ENST00000333421	ENST00000333421_7_uORF_1	9-:71910967-71911093	uORF	CTG	0.0048705	0.011061	0.161565	0.0736421	0.0675513	0.0878453	0.102941	0.231707	0.136191	0.169276	0.0976508	0.160029	trunc	0
ABRACL	ENST00000367660	ENST00000367660_4_uoORF_1	6_139028804-139028875|139034154-139034164	uoORF	CTG	1.09e-05	3.0452e-05	0.255209	0.166164	0.164021	0.123997	0.254478	0.919749	0.0917938	0.184345	0.177348	0.362591	trunc	0
ACAP2	ENST00000326793	ENST00000326793_11_uORF_3	3-:195442944-195442989	uORF	ATG	5.16e-11	1.7271e-10	0.0485748	0.0453382	0.0524554	0.0200721	0.0152575	0.144951	0.0152432	0.0726447	0.0416101	0.0620241	CDS	0
ACAT2	ENST00000367048	ENST00000367048_5_uoORF_3	6_159762067-159762091	uoORF	ACG	0.00025528	0.00065393	0.00702135	0.00853445	0.00252294	0.00631997	0.00165209	0.0187439	0.01401	0.0206125	0.00609968	0.0137546	CDS	0
ACOT13	ENST00000230048	ENST00000230048_5_uoORF_3	6_24667246-24667267	uoORF	CTG	0.00054399	0.00135509	0.0440926	0.0316037	0.0346154	0.0534801	0.0145985	0.0971203	0.0617284	0.145682	0.040948	0.0797824	CDS	0
ACTR1A	ENST00000369905	ENST00000369905_9_uoORF_3	10-:102502628-102502658	uoORF	ATT	0.019055	0.0405128	0.0746864	0.050747	0.0363409	0.0724389	0.0278015	0.0797573	0.0466338	0.0349716	0.0585533	0.0472911	trunc	0
ACTR3	ENST00000263238	ENST00000263238_7_uoORF_3	2_113890182-113890323|113913171-113913227|113916883-113916896	uoORF	GTG	0.019417	0.0412435	0.343528	0.14503	0.176848	0.156058	0.0808399	0.374345	0.188605	0.240691	0.205366	0.22112	CDS	0
ACVR2B	ENST00000352511	ENST00000352511_5_uORF_3	3_38453920-38454130	uORF	ATT	1.15e-10	3.82163e-10	0.42826	0.339564	0.328907	0.302817	0.135182	0.26455	0.266812	0.351197	0.349887	0.254435	CDS	0
ADAM19	ENST00000257527	ENST00000257527_9_uORF_1	5-:157575724-157575742	uORF	ATG	0.0001286	0.00033697	0.184358	0.339695	0.330153	0.203593	0.168712	0.354264	0.314866	0.401507	0.264449	0.309837	trunc	0
ADAR	ENST00000368474	ENST00000368474_9_uoORF_8	1-:154602579-154602626|154607991-154608022	uoORF	ATG	0.015963	0.0341921	0.0216364	0.0131335	0.00729478	0.0160489	0.021036	0.0402519	0.0128828	0.0174384	0.0145284	0.0229023	trunc	0
ADGRL1	ENST00000340736	ENST00000340736_10_uORF_1	19-:14183631-14183697|14205984-14206062	uORF	ATG	1.35e-07	4.12751e-07	0.143873	0.0637646	0.060241	0.0375094	0.107143	0.128463	0.135067	0.121875	0.0763469	0.123137	trunc	0
AGO1	ENST00000373204	ENST00000373204_6_uoORF_3	1_35883416-35883446|35888426-35888610|35892556-35892677|35893096-35893112	uoORF	ATG	0.00013964	0.000365277	0.0913103	0.0977011	0.0530796	0.097386	0.080591	0.0852417	0.0849991	0.0946866	0.0848693	0.0863796	trunc	0
AGO1	ENST00000373204	ENST00000373204_6_uORF_2	1_35883266-35883362	uORF	ACG	5.17e-06	1.47075e-05	0.249379	0.156609	0.121683	0.0702204	0.175957	0.268448	0.101438	0.156676	0.149473	0.17563	trunc	0
AGPAT1	ENST00000375107	ENST00000375107_8_uORF_2	6-:32175945-32175993	uORF	ATG	1.75e-07	5.3227e-07	0.408316	0.513914	0.289552	0.266796	0.391699	0.987124	0.45762	0.682692	0.369644	0.629784	trunc	0
AHSA1	ENST00000216479	ENST00000216479_8_uORF_5	14_77458118-77458181	uORF	CTG	7.44e-07	2.20519e-06	0.0921627	0.0303355	0.0641597	0.0672688	0.0177886	0.0781037	0.0419236	0.0680249	0.0634817	0.0514602	CDS	0
AIDA	ENST00000340020	ENST00000340020_11_uORF_3	1-:222712403-222712469	uORF	ATG	0.00035685	0.000902822	0.361038	0.155078	0.171858	0.109601	0.138941	0.451128	0.124509	0.176471	0.199394	0.222762	CDS	0
AIDA	ENST00000340020	ENST00000340020_11_uORF_2	1-:222712368-222712380	uORF	ATG	0.015625	0.0335	0.334757	0.146844	0.330827	0.165675	0.10775	0.716165	0.195208	0.243137	0.244526	0.315565	CDS	0
AKAP8L	ENST00000397410	ENST00000397410_10_uoORF_5	19-:15410575-15410594|15418910-15418975	uoORF	ATG	0.011402	0.0249481	0.0923641	0.0910931	0.0727273	0.134615	0.00975081	0.10386	0.0566802	0.110338	0.0977	0.0701573	trunc	0
AKR1A1	ENST00000372070	ENST00000372070_7_uORF_7	1_45551015-45551072	uORF	ATG	0.00065613	0.00162271	0.106855	0.0343776	0.0309777	0.0346866	0.151004	0.131691	0.082895	0.120968	0.0517243	0.121639	trunc	0
AKR1A1	ENST00000372070	ENST00000372070_7_uORF_9	1_45552482-45552542	uORF	ATG	0.0005279	0.00131737	0.0417265	0.0721423	0.0254921	0.0287759	0.0931727	0.0135939	0.0529385	0.0445302	0.0420342	0.0510588	trunc	0
AKT1S1	ENST00000391835	ENST00000391835_1_uORF_7	19-:49877203-49877311	uORF	ATG	9.36e-06	2.62171e-05	0.404959	0.697115	0.787879	1.50588	0.140741	0.186352	0.341357	0.526749	0.848959	0.2988	trunc	0
AKT1S1	ENST00000391835	ENST00000391835_1_uORF_9	19-:49877134-49877185	uORF	ATG	1.19e-06	3.4988e-06	0.475207	0.591346	0.414141	0.705882	0.32963	0.417323	0.247265	0.374486	0.546644	0.342176	trunc	0
ALDH18A1	ENST00000371224	ENST00000371224_7_uoORF_1	10-:95653370-95653405|95656596-95656708	uoORF	GTG	0.00051366	0.00128292	0.0313227	0.0158198	0.0155141	0.0091854	0.00673725	0.0478762	0.0201742	0.0140437	0.0179605	0.0222078	CDS	0
ALDOA	ENST00000395240	ENST00000395240_7_uoORF_4	16_30067237-30067279	uoORF	TTG	0.023637	0.0496526	0.0166345	0.00799886	0.00853222	0.0117438	0.00348492	0.028067	0.0111465	0.0124035	0.0112274	0.0137755	CDS	0
ALG12	ENST00000330817	ENST00000330817_11_uoORF_1	22-:49913704-49913833	uoORF	GTG	0.0050519	0.0114569	0.322214	0.21371	0.178689	0.207048	0.226629	0.0793951	0.202358	0.321705	0.230415	0.207522	trunc	0
ALKBH5	ENST00000399138	ENST00000399138_5_uORF_3	17_18183850-18183976	uORF	CTG	0.00074084	0.00182481	0.213012	0.134694	0.0497076	0.120085	0.124542	0.477762	0.0842583	0.155827	0.129375	0.210597	trunc	0
ALKBH5	ENST00000399138	ENST00000399138_5_uORF_1	17_18183975-18184056	uORF	AGG	9.12e-06	2.55547e-05	0.569073	0.269388	0.239766	0.369819	0.556777	1.06887	0.655903	0.804878	0.362012	0.771606	trunc	0
ANAPC15	ENST00000545680	ENST00000545680_5_uORF_3	11-:72111463-72111484	uORF	AGG	0.015625	0.0335	0.458595	0.663394	0.208437	0.568915	0.187614	0.785249	0.608076	0.642066	0.474835	0.555751	CDS	0
ANGEL2	ENST00000366962	ENST00000366962_8_uORF_4	1-:213015723-213015843	uORF	ATG	2.89e-14	1.0356e-13	0.0970179	0.0857828	0.0645933	0.0959368	0.0509091	0.121308	0.0626817	0.101724	0.0858327	0.0841557	CDS	0
ANKRD11	ENST00000301030	ENST00000301030_10_uORF_1	16-:89490470-89490551	uORF	CTG	7.49e-15	3.01235e-14	0.239107	0.135714	0.137308	0.128958	0.0325991	0.385702	0.106069	0.130172	0.160272	0.163636	CDS	1
ANP32A	ENST00000465139	ENST00000465139_6_uORF_4	15-:68820798-68820849	uORF	TTG	0.022464	0.0473482	0.00717063	0.00797002	0.00180754	0.0042043	0.00432132	0.00903848	0.00255243	0.00400844	0.00528812	0.00498017	CDS	0
ANP32B	ENST00000339399	ENST00000339399_5_uORF_3	9_97983351-97983378	uORF	ATG	3.54e-05	9.60052e-05	0.0494151	0.0232772	0.0547534	0.0201103	0.017067	0.0692468	0.0284061	0.0498435	0.036889	0.0411408	CDS	0
AP5M1	ENST00000261558	ENST00000261558_8_uORF_1	14_57269180-57269291	uORF	CTG	0	0	0.826939	0.540066	0.565	0.533333	0.916031	1.45307	0.379329	0.378016	0.616335	0.781613	CDS	0
APBB2	ENST00000295974	ENST00000295974_12_uORF_4	4-:41143021-41143099	uORF	ATG	1.43e-07	4.36527e-07	0.16596	0.183575	0.119048	0.166966	0.126957	0.101604	0.0898528	0.0736041	0.158887	0.0980044	trunc	0
APELA	ENST00000515275	ENST00000515275_1_uORF_3	4_164877209-164877224	uORF	CTG	0.0066639	0.0149438	0.138848	0.0522487	0.0221328	0.11526	0.100196	0.0861702	0.0550815	0.0890805	0.0821224	0.0826321	CDS	0
ARAF	ENST00000377045	ENST00000377045_9_uORF_1	X_47561218-47561248	uORF	ATG	0.00031386	0.000797987	0.307257	0.212148	0.357576	0.33792	0.138408	0.391239	0.379931	0.424084	0.303725	0.333415	CDS	0
ARAP1	ENST00000393609	ENST00000393609_8_uORF_4	11-:72732558-72732579	uORF	ATG	0.0022268	0.00522483	0.0721122	0.0753257	0.0754438	0.0664024	0.0267812	0.0616851	0.0923775	0.0835202	0.072321	0.066091	trunc	0
ARF6	ENST00000298316	ENST00000298316_7_uoORF_5	14_49893707-49893836	uoORF	ATG	0.0025768	0.00601904	0.0579276	0.041044	0.0311526	0.0487555	0.0414887	0.0487106	0.0373319	0.0372276	0.04472	0.0411897	CDS	0
ARF6	ENST00000298316	ENST00000298316_7_uORF_1	14_49893520-49893562	uORF	GTG	0.0055826	0.0126175	0.0997136	0.0623027	0.0771893	0.0934197	0.0646736	0.0872334	0.112426	0.124395	0.0831563	0.0971819	CDS	0
ARFGEF1	ENST00000262215	ENST00000262215_8_uORF_2	8-:67343741-67343768	uORF	ATG	1.87e-06	5.43968e-06	0.0435122	0.0387387	0.0289161	0.036469	0.00235405	0.0509666	0.0232079	0.039233	0.036909	0.0289404	trunc	0
ARHGAP12	ENST00000396144	ENST00000396144_8_uORF_2	10-:31908865-31908895	uORF	ATG	0.0010706	0.00259644	0.0918596	0.121534	0.119608	0.0816901	0.00129534	0.137771	0.0609656	0.0652504	0.103673	0.0663206	trunc	0
ARHGAP35	ENST00000672722	ENST00000672722_1_uORF_1	19_46861139-46861196	uORF	ATG	6.65e-06	1.88045e-05	0.0545508	0.04769	0.0673759	0.0797872	0.0779768	0.169543	0.0463852	0.077821	0.062351	0.0929315	trunc	1
ARHGAP42	ENST00000298815	ENST00000298815_13_uORF_1	11_100687406-100687502	uORF	ACG	0.00043563	0.00109523	0.29432	0.159849	0.140928	0.166184	0.188862	0.184874	0.192716	0.182342	0.19032	0.187198	CDS	0
ARID3B	ENST00000622429	ENST00000622429_1_uORF_1	15_74543904-74543922	uORF	ATG	0.0007212	0.00177793	0.154595	0.167855	0.17656	0.175498	0.0920349	0.248989	0.21176	0.21108	0.168627	0.190966	CDS	0
ARIH2	ENST00000356401	ENST00000356401_9_uORF_2	3_48927476-48927497	uORF	ATG	0.0022268	0.00522483	0.0537482	0.0921626	0.0816143	0.0590462	0.0406404	0.0253566	0.0830201	0.0420945	0.0716428	0.0477779	CDS	0
ARMC1	ENST00000276569	ENST00000276569_8_uORF_1	8-:65634009-65634045	uORF	GTG	0.017028	0.0363722	0.283174	0.106762	0.17657	0.193036	0.0941534	0.169887	0.0984127	0.166495	0.189885	0.132237	CDS	0
ARPC5L	ENST00000353214	ENST00000353214_6_uORF_2	9_124869177-124869270	uORF	CTG	0.007675	0.0171129	0.0403587	0.0210223	0.0113636	0.00755287	0.049527	0.0375671	0.0419897	0.0136253	0.0200744	0.0356773	CDS	0
ASF1A	ENST00000229595	ENST00000229595_6_uORF_3	6_118894202-118894226	uORF	ATG	0.004773	0.0108496	0.0585968	0.0289157	0.0514653	0.0259235	0.0253165	0.0392157	0.0553597	0.0439798	0.0412253	0.0409679	CDS	0
ASXL2	ENST00000435504	ENST00000435504_9_uORF_1	2-:25878394-25878448	uORF	ATG	3.05e-06	8.79187e-06	0.523457	0.747405	0.103333	0.263359	0.153846	0.672414	0.310811	0.642857	0.409388	0.444982	trunc	0
ATF2	ENST00000264110	ENST00000264110_7_uORF_2	2-:175168081-175168108	uORF	ACG	0.00020614	0.000532618	0.247024	0.100372	0.151899	0.0994398	0.0611702	0.278459	0.133603	0.0841515	0.149684	0.139346	trunc	0
ATF2	ENST00000264110	ENST00000264110_7_uORF_3	2-:175136458-175136486|175151059-175151085	uORF	AAG	0.0033757	0.00779624	0.123214	0.17658	0.142053	0.114846	0.0678191	0.1331	0.198887	0.029453	0.139173	0.107315	trunc	0
ATG13	ENST00000683050	ENST00000683050_1_uORF_1	11_46617588-46617636	uORF	ATG	0.00033494	0.000849224	0.436712	0.342541	0.253968	0.286932	0.297335	0.306122	0.292833	0.135211	0.330038	0.257875	trunc	0
ATG5	ENST00000343245	ENST00000343245_7_uoORF_2	6-:106316197-106316233	uoORF	ATG	0.00014743	0.000385172	0.365112	0.315789	0.160417	0.402299	0.127551	0.25641	0.363158	0.244389	0.310904	0.247877	trunc	0
ATP11C	ENST00000682941	ENST00000682941_1_uORF_1	X-:139932875-139932902	uORF	ATG	3.54e-05	9.60052e-05	0.0424555	0.0328168	0.0444113	0.0558865	0.0190698	0.04267	0.0359139	0.0301255	0.0438925	0.0319448	CDS	0
ATP13A2	ENST00000326735	ENST00000326735_13_uoORF_1	1-:17005067-17005072|17005373-17005556|17005683-17005778|17011728-17011757	uoORF	ATG	3.5e-13	1.21321e-12	0.401363	0.380315	0.254438	0.550857	0.289474	0.453568	0.224062	0.377778	0.396743	0.33622	trunc	0
ATP13A3	ENST00000645319	ENST00000645319_2_uORF_2	3-:194486680-194486728	uORF	CTG	2.78e-06	8.03334e-06	0.120533	0.115984	0.0766161	0.0750916	0.0649254	0.245063	0.0567598	0.21575	0.0970562	0.145624	trunc	0
ATP1A1	ENST00000295598	ENST00000295598_10_uORF_5	1_116373293-116373311	uORF	ACG	0.012559	0.0273083	0.00891917	0.00586844	0.00227998	0.00363234	0.00147102	0.0126891	0.0054877	0.00994896	0.00517498	0.00739919	trunc	0
ATP5MK	ENST00000369811	ENST00000369811_5_uORF_4	10-:103395796-103395823	uORF	ATG	5.95e-06	1.68707e-05	0.0103806	0.0112871	0.0220238	0.0190141	0.0272277	0.00942745	0.0298961	0.0166283	0.0156764	0.0207949	CDS	0
ATRX	ENST00000373344	ENST00000373344_11_uORF_4	X-:77786133-77786202	uORF	ATG	1.8e-06	5.24126e-06	0.0341848	0.0286829	0.0386709	0.016174	0.0234604	0.0950626	0.0249452	0.0611303	0.0294281	0.0511496	CDS	0
ATXN7L3B	ENST00000519948	ENST00000519948_4_uoORF_2	12_74538008-74538155	uoORF	CTG	0.00074392	0.00183209	0.229648	0.123479	0.163845	0.19162	0.0839199	0.385993	0.178158	0.182075	0.177148	0.207537	trunc	0
AVL9	ENST00000318709	ENST00000318709_9_uORF_1	7_32495597-32495615	uORF	ATG	0.00097656	0.00237901	0.24335	0.132661	0.178138	0.205596	0.0410053	0.146119	0.228063	0.337687	0.189936	0.188218	trunc	0
AZIN1	ENST00000684566	ENST00000684566_1_uORF_3	8-:102863878-102864016	uORF	TTG	0.00092873	0.00226929	0.890046	0.227137	0.354439	0.239384	0.945813	1.59764	0.537825	1.01928	0.427751	1.02514	CDS	1
AZIN1	ENST00000684566	ENST00000684566_1_uORF_1	8-:102863862-102863916	uORF	ATG	1.54e-05	4.2686e-05	1.03177	0.358836	0.440927	0.325902	0.463054	1.46457	0.373255	0.831782	0.539359	0.783165	CDS	1
B3GNT2	ENST00000301998	ENST00000301998_5_uORF_1	2_62196235-62196268	uORF	ATG	0.012257	0.0267211	0.0538752	0.0639241	0.0470723	0.0342298	0.15534	0.200407	0.0416667	0.154952	0.0497754	0.138091	trunc	0
BAK1	ENST00000374467	ENST00000374467_4_uORF_1	6-:33580140-33580158	uORF	ATG	0.0001286	0.00033697	0.402325	0.688596	0.428351	0.660522	0.29385	0.311232	0.346004	0.440552	0.544949	0.347909	CDS	0
BAK1	ENST00000374467	ENST00000374467_4_uORF_2	6-:33577630-33577635|33580024-33580220	uORF	ATG	2.66e-07	8.03459e-07	0.252343	0.199561	0.352851	0.316436	0.279423	0.276911	0.243694	0.240977	0.280298	0.260251	CDS	0
BAK1	ENST00000374467	ENST00000374467_4_uORF_3	6-:33580171-33580213	uORF	CTG	0.0007667	0.00188581	0.102737	0.104167	0.171032	0.213518	0.0159453	0.0842434	0.175488	0.149682	0.147863	0.10634	CDS	0
BAMBI	ENST00000375533	ENST00000375533_6_uORF_2	10_28677539-28677611	uORF	CTG	0.00075839	0.00186615	0.389888	0.149497	0.200886	0.141818	0.128326	0.211813	0.223472	0.339286	0.220522	0.225724	CDS	0
BAP1	ENST00000460680	ENST00000460680_6_uoORF_1	3-:52409874-52409907	uoORF	ATG	0.0007915	0.00194354	0.333333	0.188015	0.158076	0.298319	0.0206084	0.331126	0.144364	0.335206	0.244436	0.207826	CDS	0
BASP1	ENST00000322611	ENST00000322611_4_uORF_1	5_17217646-17217781	uORF	ACG	0.00025403	0.000651241	0.0720904	0.0470318	0.0429573	0.027118	0.0270171	0.127447	0.0351284	0.0558318	0.0472994	0.0613562	CDS	0
BAZ1B	ENST00000339594	ENST00000339594_9_uORF_2	7-:73522078-73522108	uORF	ATG	0.0013428	0.00322958	0.0411306	0.0204246	0.0243994	0.0223056	0.00918119	0.0318875	0.01268	0.0297303	0.0270651	0.0208697	trunc	0
BCKDK	ENST00000219794	ENST00000219794_11_uORF_4	16_31108431-31108479|31109046-31109106	uORF	CTG	3.63e-05	9.83549e-05	0.153276	0.101224	0.0743381	0.152866	0.0861423	0.136111	0.186752	0.30238	0.120426	0.177846	CDS	0
BCL2L13	ENST00000317582	ENST00000317582_10_uORF_2	22_17638766-17638787	uORF	ATG	0.0020752	0.00489264	0.209313	0.163743	0.175349	0.239153	0.0958165	0.225027	0.100206	0.0944584	0.19689	0.128877	CDS	0
BCLAF1	ENST00000531224	ENST00000531224_6_uORF_3	6-:136289741-136289801	uORF	ATG	3.76e-13	1.30226e-12	0.0660703	0.0407997	0.0511258	0.0538194	0.0256051	0.0848908	0.0624336	0.0498573	0.0529538	0.0556967	CDS	0
BFAR	ENST00000261658	ENST00000261658_7_uORF_5	16_14644280-14644343	uORF	ATG	0.0037246	0.00856959	0.0613437	0.123163	0.0829987	0.0740291	0.130396	0.0620884	0.0837365	0.0790698	0.0853836	0.0888228	trunc	0
BMP7	ENST00000395863	ENST00000395863_8_uORF_1	20-:57266214-57266256	uORF	ATG	7.81e-06	2.19913e-05	0.168014	0.125	0.12037	0.145191	0.0263158	0.0853933	0.0921053	0.0744681	0.139644	0.0695706	trunc	0
BNIP3L	ENST00000380629	ENST00000380629_7_uoORF_1	8_26383113-26383146	uoORF	CTG	0.00037294	0.000942796	0.10612	0.0287834	0.0686275	0.0555556	0.00830368	0.0606421	0.0490126	0.0529846	0.0647716	0.0427357	CDS	0
BRD3	ENST00000303407	ENST00000303407_12_uORF_2	9-:134053492-134053567	uORF	ATG	2.85e-07	8.59874e-07	0.0955213	0.0731977	0.042465	0.0706307	0.0138749	0.123995	0.10611	0.127442	0.0704537	0.0928555	CDS	0
BTBD1	ENST00000261721	ENST00000261721_9_uORF_1	15-:83067175-83067199	uORF	ATG	4.77e-07	1.42783e-06	0.28666	0.169766	0.246929	0.169719	0.0462963	0.220769	0.118874	0.134253	0.218269	0.130048	trunc	0
BTG1	ENST00000256015	ENST00000256015_5_uORF_1	12-:92145756-92145828	uORF	ATG	6.27e-09	2.00141e-08	0.319394	0.336533	0.298035	0.318737	0.30897	0.687419	0.418281	0.471154	0.318175	0.471456	CDS	0
BUB3	ENST00000368865	ENST00000368865_9_uoORF_3	10_123154454-123154485|123154917-123154931	uoORF	GTG	0.0010985	0.0026608	0.0292813	0.0174301	0.0326087	0.022139	0.00928129	0.0735679	0.0364005	0.0188999	0.0253648	0.0345374	trunc	0
BUD31	ENST00000222969	ENST00000222969_10_uORF_6	7_99409087-99409192	uORF	ATG	1.65e-07	5.02376e-07	0.113414	0.0860401	0.0413115	0.0934169	0.03524	0.118486	0.044687	0.0772947	0.0835456	0.068927	CDS	0
BUD31	ENST00000222969	ENST00000222969_10_uORF_5	7_99409006-99409048	uORF	ATG	5.96e-07	1.77569e-06	0.148941	0.0625432	0.0596721	0.105956	0.0526047	0.0973945	0.056425	0.0305958	0.0942781	0.059255	CDS	0
BZW2	ENST00000433922	ENST00000433922_6_uoORF_2	7_16646159-16646304|16665436-16665447	uoORF	ATG	0.020073	0.0425567	0.0968703	0.045999	0.0519759	0.0481791	0.0639875	0.121387	0.0863831	0.105735	0.0607561	0.0943732	trunc	0
C11orf58	ENST00000228136	ENST00000228136_9_uoORF_3	11_16738678-16738841|16744600-16744611	uoORF	GTG	7.19e-08	2.22218e-07	0.223214	0.0869876	0.132812	0.139346	0.073911	0.313882	0.13512	0.178533	0.14559	0.175362	trunc	0
C11orf71	ENST00000623205	ENST00000623205_2_uORF_1	11-:114400400-114400448	uORF	ATG	9.23e-07	2.72746e-06	0.720257	0.528986	0.357143	1.22222	0.460674	1.54286	0.643312	0.366972	0.707152	0.753454	CDS	0
C15orf39	ENST00000394987	ENST00000394987_5_uORF_3	15_75202003-75202059|75205998-75206014	uORF	ATG	5.45e-05	0.000146368	0.116131	0.0823673	0.0550227	0.105629	0.0508537	0.180523	0.0684297	0.102753	0.0897875	0.10064	CDS	0
C16orf72	ENST00000327827	ENST00000327827_12_uORF_2	16_9091737-9091752	uORF	ATG	0.0041829	0.00956544	0.135856	0.0949153	0.122236	0.206616	0.0595611	0.198929	0.150545	0.0797912	0.139906	0.122207	trunc	0
C20orf27	ENST00000217195	ENST00000217195_12_uORF_2	20-:3760148-3760163	uORF	ATG	0.0016	0.0038159	0.302044	0.296504	0.310924	0.339706	0.0994832	0.231072	0.474901	0.401559	0.312295	0.301754	CDS	0
C5orf22	ENST00000325366	ENST00000325366_14_uoORF_2	5_31532375-31532396	uoORF	CTG	0.012166	0.0265444	0.0823009	0.0644637	0.0269542	0.0518617	0.0238516	0.0909091	0.121678	0.118694	0.0563951	0.0887833	trunc	0
C7orf26	ENST00000344417	ENST00000344417_10_uORF_2	7_6590117-6590129	uORF	ATG	0.015625	0.0335	0.455882	0.460526	0.473318	0.451697	0.207483	0.616402	0.287746	0.53913	0.460356	0.41269	trunc	0
C9orf64	ENST00000376344	ENST00000376344_8_uORF_1	9-:83956599-83956686	uORF	ATC	0.00011158	0.000293765	0.25	1	1	1	0.155819	0.288618	0.187169	0.276644	0.8125	0.227062	trunc	0
CA11	ENST00000084798	ENST00000084798_9_uORF_1	19-:48645681-48645813	uORF	GTG	2.18e-05	5.97862e-05	0.187982	0.148936	0.447514	0.241036	0.05	0.0142857	0.747475	0.04	0.256367	0.21294	trunc	0
CA11	ENST00000084798	ENST00000084798_9_uORF_2	19-:48645935-48646025	uORF	ATG	0.011654	0.0254824	0.209553	0.175123	0.20442	0.135458	0.233333	0.3	0.232323	1.2	0.181138	0.491414	trunc	0
CABIN1	ENST00000398319	ENST00000398319_6_uORF_2	22_24011561-24011645	uORF	ATG	5.05e-07	1.50949e-06	0.0391121	0.0277101	0.019145	0.0116959	0.0324098	0.0173956	0.0444581	0.0387069	0.0244158	0.0332426	trunc	0
CABIN1	ENST00000398319	ENST00000398319_6_uORF_3	22_24011463-24011583	uORF	CTG	0.00054852	0.00136591	0.0347075	0.0103532	0.0146866	0.0178363	0.0109775	0.0347913	0.0415453	0.0370055	0.0193959	0.0310799	trunc	0
CALB1	ENST00000265431	ENST00000265431_7_uoORF_3	8-:90082063-90082102|90082618-90082792	uoORF	CTG	3.42e-05	9.28884e-05	0.327974	0.129213	0.108761	0.0925373	0.0618762	0.395522	0.0769981	0.342391	0.164622	0.219197	trunc	0
CALD1	ENST00000422748	ENST00000422748_5_uORF_7	7_134779673-134779721	uORF	CTG	0.0014901	0.00356978	0.0210373	0.0223605	0.0158834	0.0087825	0.0143692	0.0283546	0.0219081	0.0282164	0.0170159	0.0232121	trunc	0
CALM3	ENST00000291295	ENST00000291295_14_uORF_8	19_46601340-46601403	uORF	AGG	0.00064451	0.00159518	0.11114	0.0621627	0.116102	0.0613162	0.0166764	0.168914	0.0574279	0.0927657	0.0876801	0.0839461	trunc	0
CAPZB	ENST00000264202	ENST00000264202_8_uoORF_4	1-:19419749-19419750|19485435-19485539	uoORF	ATG	0.012222	0.0266606	0.040225	0.0127573	0.0285119	0.0100767	0.00830712	0.0300913	0.0213916	0.0214771	0.0228927	0.0203168	trunc	0
CASK	ENST00000378163	ENST00000378163_7_uORF_6	X-:41923400-41923427	uORF	ATG	3.54e-05	9.60052e-05	0.14103	0.0970275	0.0789211	0.0878338	0.0156713	0.0876963	0.0666565	0.0758974	0.101203	0.0614804	trunc	0
CBWD1	ENST00000377400	ENST00000377400_8_uORF_6	9-:178988-179018	uORF	GTG	1.89e-05	5.20523e-05	0.0328745	0.0302772	0.0394089	0.00791367	0.118465	0.0782159	0.0311978	0.09689	0.0276185	0.0811921	CDS	0
CBX3	ENST00000396386	ENST00000396386_7_uORF_2	7_26201750-26201768	uORF	ATG	0.00097656	0.00237901	0.0377538	0.0156784	0.0317555	0.018596	0.013273	0.0589059	0.02206	0.0424766	0.0259459	0.0341789	trunc	0
CBX5	ENST00000209875	ENST00000209875_9_uORF_4	12-:54280032-54280056	uORF	ATA	0.00024188	0.000621071	0.0663668	0.0312482	0.0213868	0.0480049	0.00843608	0.0792591	0.0325373	0.0336879	0.0417517	0.0384801	trunc	0
CCAR2	ENST00000389279	ENST00000389279_7_uoORF_6	8_22605745-22605787	uoORF	ACG	7.44e-05	0.000198249	0.0226462	0.0265098	0.0190953	0.0275196	0.000676476	0.0442298	0.0281264	0.029703	0.0239427	0.0256839	CDS	0
CCDC47	ENST00000225726	ENST00000225726_10_uoORF_11	17-:63766171-63766194|63773411-63773559	uoORF	GTG	1.54e-06	4.4985e-06	0.0382624	0.0211075	0.0237382	0.0251096	0.0203955	0.0682028	0.0234949	0.0475874	0.0270544	0.0399201	CDS	0
CCDC71	ENST00000321895	ENST00000321895_7_uORF_3	3-:49164212-49164260|49166266-49166323	uORF	ATG	0.00038842	0.000980745	0.179585	0.0798442	0.0946502	0.0976514	0.0431138	0.125452	0.0625686	0.17594	0.112933	0.101769	trunc	0
CCDC85C	ENST00000380243	ENST00000380243_9_uORF_1	14-:99603969-99603981	uORF	ATG	0.015625	0.0335	0.48174	0.437186	0.486683	0.246835	0.134058	0.41896	0.269716	0.343465	0.413111	0.29155	trunc	0
CCNA2	ENST00000274026	ENST00000274026_10_uoORF_1	4-:121823627-121823852	uoORF	TTG	0.0073056	0.0163402	0.115866	0.0892414	0.0750302	0.0529599	0.0262391	0.137026	0.0639215	0.0966549	0.0832744	0.0809603	CDS	0
CCNA2	ENST00000274026	ENST00000274026_10_uORF_3	4-:121823755-121823839	uORF	CTG	0.0071805	0.0160678	0.0296199	0.00520708	0.0111715	0.00663658	0.0107289	0.0643211	0.00739079	0.0307173	0.0131588	0.0282895	CDS	0
CCNG1	ENST00000340828	ENST00000340828_7_uoORF_1	5_163437769-163437804|163439256-163439260	uoORF	GTG	0.0035515	0.00819063	0.120268	0.0676594	0.0860324	0.127423	0.0394818	0.175997	0.106107	0.115523	0.100346	0.109277	trunc	0
CCNG1	ENST00000340828	ENST00000340828_7_uORF_2	5_163437644-163437749	uORF	CTG	0.0010301	0.0025032	0.124077	0.0562383	0.0738866	0.0540206	0.0561382	0.135779	0.0434566	0.0977738	0.0770555	0.0832868	trunc	0
CCNI	ENST00000237654	ENST00000237654_9_uORF_2	4-:77075554-77075566	uORF	ATG	0.0019531	0.00462039	0.0394993	0.0216823	0.0223652	0.0292835	0.0608318	0.0141414	0.0151194	0.0125224	0.0282076	0.0256538	CDS	1
CCNY	ENST00000374704	ENST00000374704_8_uORF_1	10_35336689-35336752	uORF	CTG	0.00060483	0.0015009	0.467466	0.567308	0.707692	0.44921	1.04372	0.42439	0.908524	0.458937	0.547919	0.708892	CDS	0
CCT3	ENST00000295688	ENST00000295688_8_uoORF_2	1-:156338180-156338231	uoORF	CTG	0.0026278	0.00613132	0.0240182	0.0125032	0.0155192	0.0104547	0.0096215	0.0280394	0.0123628	0.0187151	0.0156238	0.0171847	trunc	0
CD276	ENST00000561213	ENST00000561213_5_uoORF_1	15_73699604-73699718|73702254-73702383	uoORF	ACG	6.79e-10	2.22064e-09	0.133359	0.0929357	0.0832114	0.112835	0.0454036	0.108241	0.0739163	0.113586	0.105585	0.0852868	CDS	0
CD2AP	ENST00000359314	ENST00000359314_5_uORF_1	6_47477996-47478065	uORF	GTG	0.00032135	0.000815968	0.0724928	0.0219901	0.0320946	0.0533545	0.0306076	0.0838264	0.0492312	0.0853801	0.044983	0.0622613	trunc	0
CDC16	ENST00000356221	ENST00000356221_8_uORF_4	13_114234970-114235048	uORF	CTG	0.0083116	0.0184201	0.0353415	0.02852	0.0162413	0.0143433	0.0171256	0.0868897	0.0178672	0.0643564	0.0236115	0.0465597	CDS	0
CDC27	ENST00000066544	ENST00000066544_8_uORF_2	17-:47189181-47189250	uORF	ATG	1.37e-05	3.80639e-05	0.0593552	0.0377418	0.0196643	0.0425012	0.0236052	0.0932009	0.053001	0.0307692	0.0398156	0.0501441	CDS	0
CDC37L1	ENST00000381854	ENST00000381854_4_uoORF_2	9_4679700-4679823	uoORF	ACG	0.003985	0.00915219	0.207792	0.0667904	0.204204	0.180488	0.232406	0.201149	0.124804	0.237525	0.164819	0.198971	CDS	0
CDC42BPB	ENST00000361246	ENST00000361246_7_uORF_2	14-:103057231-103057387	uORF	ATG	0.002088	0.00492123	0.0464157	0.0177989	0.0315675	0.0334015	0.0511892	0.154407	0.0243026	0.014176	0.0322959	0.0610188	trunc	1
CDC42EP4	ENST00000335793	ENST00000335793_4_uORF_1	17-:73286554-73286605	uORF	ATC	4.72e-08	1.46621e-07	0.232955	0.14071	0.0553977	0.138132	0.00338983	0.11875	0.227273	0.334365	0.141799	0.170944	CDS	0
CDC5L	ENST00000371477	ENST00000371477_4_uoORF_1	6_44387761-44387839	uoORF	ATC	0.0035074	0.00809083	0.0516338	0.0202796	0.0135706	0.0243135	0.0116279	0.0548571	0.0272934	0.0486022	0.0274494	0.0355952	trunc	0
CDCA2	ENST00000380665	ENST00000380665_3_uORF_2	8_25459334-25459473|25460239-25460271	uORF	CTG	0.00067927	0.00167852	0.0474948	0.0160858	0.040715	0.0140504	0.0224719	0.0853242	0.055779	0.0337443	0.0295865	0.0493299	CDS	0
CDK12	ENST00000447079	ENST00000447079_6_uoORF_2	17_39462030-39462240	uoORF	CTG	0.00078901	0.00193776	0.0370133	0.0358722	0.0274365	0.0216745	0.0232204	0.0248793	0.0275009	0.0378463	0.0304991	0.0283617	CDS	0
CDK12	ENST00000447079	ENST00000447079_6_uORF_1	17_39461708-39461909	uORF	CTG	0.018048	0.0384556	0.0745073	0.0299754	0.0802621	0.0505737	0.0605253	0.0527293	0.0860351	0.0600858	0.0588296	0.0648439	CDS	0
CDK16	ENST00000457458	ENST00000457458_6_uORF_3	X_47218339-47218372	uORF	ATG	1.29e-05	3.58787e-05	0.211065	0.275444	0.255599	0.113671	0.140508	0.188056	0.209176	0.171558	0.213945	0.177324	trunc	0
CDK4	ENST00000257904	ENST00000257904_11_uORF_3	12-:57752175-57752292	uORF	ATG	1.76e-05	4.86137e-05	0.08152	0.0532489	0.027914	0.0828866	0.0609494	0.18006	0.0637905	0.110392	0.0613924	0.103798	CDS	0
CDK4	ENST00000257904	ENST00000257904_11_uORF_4	12-:57752233-57752245	uORF	ATG	0.023688	0.049749	0.05095	0.0363594	0.0501697	0.0527835	0.0398515	0.0856718	0.0440658	0.0474869	0.0475656	0.054269	CDS	0
CEBPG	ENST00000652630	ENST00000652630_1_uoORF_2	19_33379183-33379243	uoORF	TTG	0.00028238	0.000720828	0.261345	0.107914	0.158358	0.171622	0.00647249	0.0348259	0.0751315	0.165663	0.17481	0.0705231	trunc	0
CEBPZ	ENST00000234170	ENST00000234170_10_uoORF_2	2-:37231500-37231581	uoORF	ATG	0.0011003	0.00266472	0.0203766	0.0174085	0.0104943	0.0121076	0.0075079	0.0289626	0.00925676	0.0252973	0.0150967	0.0177562	CDS	0
CECR2	ENST00000342247	ENST00000342247_10_uORF_1	22_17369528-17369582	uORF	ATG	0.0070853	0.0158657	0.0173716	0.0106431	0.0176817	0.0132534	0.000937559	0.0304979	0.00799065	0.0219033	0.0147375	0.0153324	CDS	0
CEMIP2	ENST00000377044	ENST00000377044_9_uORF_1	9-:71768394-71768460	uORF	ATG	2.89e-06	8.34379e-06	0.212934	0.103075	0.170121	0.116298	0.0528523	0.14248	0.13331	0.283647	0.150607	0.153072	trunc	0
CENPA	ENST00000335756	ENST00000335756_9_uoORF_4	2_26786161-26786296	uoORF	GTG	0.0022574	0.00529366	0.38004	0.0488281	0.309237	0.376	0.03	0.445498	0.178889	0.1875	0.278526	0.210472	CDS	0
CENPF	ENST00000366955	ENST00000366955_8_uORF_3	1_214613724-214613736	uORF	ATG	0.0019531	0.00462039	0.0129364	0.0161123	0.018111	0.00484958	0.0133291	0.0165833	0.024435	0.0160273	0.0130023	0.0175937	CDS	0
CENPK	ENST00000396679	ENST00000396679_6_uoORF_1	5-:65554878-65554946|65561462-65561523	uoORF	CTG	1.09e-05	3.0452e-05	0.142552	0.159437	0.194411	0.164557	0.0594926	0.213528	0.122984	0.199195	0.165239	0.1488	CDS	0
CHCHD7	ENST00000303759	ENST00000303759_3_uORF_4	8_56212779-56212815	uORF	ATG	1.04e-06	3.06454e-06	0.346893	0.131455	0.108303	0.197183	0.19258	0.207254	0.239628	0.407143	0.195959	0.261651	CDS	0
CHD1	ENST00000614616	ENST00000614616_5_uORF_3	5-:98928853-98928943	uORF	ACG	3.12e-10	1.02831e-09	0.198591	0.123366	0.163507	0.125565	0.0825	0.304114	0.0944819	0.151079	0.152757	0.158044	trunc	0
CHD2	ENST00000394196	ENST00000394196_9_uORF_2	15_92900345-92900363	uORF	ATG	4.02e-06	1.14941e-05	0.346084	0.571116	0.249438	0.571856	0.730392	0.765957	0.951562	0.324841	0.434624	0.693188	trunc	0
CHD2	ENST00000394196	ENST00000394196_9_uORF_3	15_92900555-92900627	uORF	CTG	0.00015512	0.000404577	0.553734	0.400438	0.28764	0.443114	0.25	0.246809	0.1875	0.464968	0.421231	0.287319	trunc	0
CHIC2	ENST00000263921	ENST00000263921_8_uORF_2	4-:54064449-54064521	uORF	GTG	1.04e-09	3.38804e-09	0.61	0.381924	0.489583	0.623377	0.21134	1.07589	0.433535	1.45455	0.526221	0.793828	CDS	0
CHN1	ENST00000409900	ENST00000409900_9_uORF_4	2-:175005328-175005361	uORF	ATG	0.012257	0.0267211	0.143673	0.228	0.0923483	0.285285	0.00358423	0.0977918	0.170732	0.216783	0.187327	0.122223	trunc	0
CHST12	ENST00000618655	ENST00000618655_2_uORF_1	7_2432574-2432604	uORF	ATG	3.81e-06	1.0916e-05	0.607774	0.283516	0.463602	0.298969	0.0578035	0.353047	0.260963	0.182058	0.413465	0.213468	trunc	0
CHST6	ENST00000390664	ENST00000390664_3_uORF_1	16-:75495115-75495160	uORF	ATG	1.46e-06	4.26992e-06	0.291502	0.138931	0.133333	0.127193	0.052356	0.0780142	0.0950413	0.363636	0.17274	0.147262	trunc	0
CHST9	ENST00000581714	ENST00000581714_5_uoORF_2	18-:27142795-27142840	uoORF	ATG	3.43e-06	9.85717e-06	0.458333	0.351816	0.306604	0.139601	0.0288714	0.219101	0.392308	0.0960699	0.314089	0.184088	CDS	0
CHSY1	ENST00000254190	ENST00000254190_4_uORF_2	15-:101251922-101251934	uORF	ATG	0.0060105	0.0135303	0.43296	0.20739	0.343486	0.214801	0.484728	1.13714	0.577555	0.416968	0.299659	0.654098	trunc	1
CHTOP	ENST00000368690	ENST00000368690_7_uORF_6	1_153634100-153634193	uORF	CTG	0.00011744	0.000308916	0.319187	0.154682	0.111507	0.162172	0.10534	0.389525	0.256042	0.307407	0.186887	0.264579	trunc	0
CLASP1	ENST00000397587	ENST00000397587_7_uORF_1	2-:121606141-121606180|121649371-121649437	uORF	ATT	0.0022773	0.00533947	0.0416569	0.0182665	0.0394843	0.0229277	0.0807601	0.0329164	0.0525708	0.0465269	0.0305838	0.0531935	trunc	0
CLASP1	ENST00000397587	ENST00000397587_7_uORF_2	2-:121606092-121606161	uORF	AAG	1.16e-07	3.557e-07	0.0428336	0.0336676	0.0273973	0.0176367	0.0184086	0.0724161	0.0494897	0.0242464	0.0303838	0.0411402	trunc	0
CLCN3	ENST00000347613	ENST00000347613_8_uORF_2	4_169620664-169620691	uORF	ATG	0.00017246	0.000447729	0.328864	0.167832	0.237082	0.180982	0.301556	0.186858	0.432699	0.331349	0.22869	0.313116	trunc	0
CLCN3	ENST00000347613	ENST00000347613_8_uoORF_3	4_169621000-169621063|169635912-169635939	uoORF	ATG	3.3e-07	9.92882e-07	0.234298	0.275058	0.158055	0.125767	0.173152	0.166324	0.239002	0.132937	0.198294	0.177854	trunc	0
CLDN12	ENST00000394605	ENST00000394605_2_uoORF_5	7_90405583-90405612|90412643-90412740	uoORF	TTG	0.0012748	0.00307285	0.0531369	0.0387989	0.0139234	0.0370185	0.0463038	0.060462	0.0326902	0.023988	0.0357194	0.040861	CDS	0
CLDN12	ENST00000394605	ENST00000394605_2_uORF_4	7_90403527-90403542	uORF	ATG	0.0081	0.017977	0.0607278	0.0337382	0.0328195	0.0525263	0.0495532	0.146739	0.0238478	0.0547226	0.0449529	0.0687157	CDS	0
CLDN7	ENST00000360325	ENST00000360325_11_uORF_10	17-:7262208-7262241	uORF	ATC	0.0090949	0.0200922	0.058106	0.0254804	0.0422284	0.0537591	0.0180428	0.0245372	0.0490516	0.0459213	0.0448935	0.0343882	CDS	0
CLIC1	ENST00000375784	ENST00000375784_7_uoORF_3	6-:31736263-31736404	uoORF	CTG	0.0033629	0.0077679	0.0500119	0.0296218	0.0623402	0.0811446	0.0242479	0.101569	0.0773663	0.088841	0.0557796	0.0730061	CDS	0
CLIP2	ENST00000223398	ENST00000223398_11_uORF_1	7_74317489-74317507	uORF	ATG	2.25e-05	6.16655e-05	0.148813	0.133537	0.107333	0.0741191	0.0497076	0.21194	0.178268	0.172316	0.11595	0.153058	trunc	0
CLPTM1L	ENST00000320895	ENST00000320895_10_uORF_2	5-:1344934-1345018	uORF	ATG	3.2e-08	9.99983e-08	0.285714	0.141143	0.103413	0.176641	0.058011	0.390357	0.15596	0.368984	0.176728	0.243328	trunc	0
CLSTN1	ENST00000361311	ENST00000361311_4_uORF_1	1-:9823804-9823882	uORF	ACG	7.61e-10	2.48771e-09	0.0208691	0.0114917	0.0136323	0.00775098	0.00409378	0.0339367	0.0103504	0.0300345	0.013436	0.0196038	trunc	0
CMSS1	ENST00000421999	ENST00000421999_8_uORF_3	3_99817901-99817949	uORF	CTG	0.017578	0.037495	0.143778	0.0392491	0.0887728	0.0438144	0.0569853	0.116921	0.0701543	0.154082	0.0789037	0.0995355	CDS	0
CMSS1	ENST00000421999	ENST00000421999_8_uORF_1	3_99817948-99817978	uORF	ATG	0.00016254	0.000422988	0.381689	0.219283	0.283725	0.174399	0.123162	0.246914	0.177676	0.179592	0.264774	0.181836	CDS	0
CNBP	ENST00000441626	ENST00000441626_6_uORF_5	3-:129183854-129183908	uORF	ATG	0.001434	0.00343989	0.0127713	0.0122424	0.0122144	0.0166781	0.00760456	0.0347818	0.0156584	0.0191407	0.0134765	0.0192964	CDS	0
CNOT4	ENST00000541284	ENST00000541284_5_uORF_2	7-:135510039-135510078	uORF	ATG	7.54e-05	0.000200658	0.216667	0.138955	0.132653	0.1125	0.131926	0.293981	0.114773	0.113982	0.150194	0.163666	CDS	0
CNOT7	ENST00000361272	ENST00000361272_9_uORF_2	8-:17245235-17245247|17246674-17246782	uORF	ATG	3.17e-10	1.0442e-09	0.418691	0.33194	0.228477	0.170561	0.293917	0.650138	0.41644	0.574949	0.287417	0.483861	CDS	0
COA1	ENST00000438444	ENST00000438444_5_uoORF_4	7-:43648610-43648646	uoORF	TTG	4.07e-06	1.16348e-05	0.359521	0.394602	0.212045	0.181412	0.497817	0.750608	0.416337	0.542904	0.286895	0.551917	trunc	0
COL1A2	ENST00000297268	ENST00000297268_11_uORF_3	7_94394948-94394969	uORF	ATG	0.0018383	0.00436291	0.0637445	0.0492919	0.00640478	0.0327014	0.0340909	0.0517241	0.0140331	0.0188531	0.0380357	0.0296753	CDS	0
COL4A1	ENST00000375820	ENST00000375820_10_uORF_2	13-:110307087-110307114	uORF	CTG	0.0074822	0.0167021	0.0281863	0.0199063	0.0323878	0.0348678	0.00306984	0.0450409	0.0210526	0.0431995	0.0288371	0.0280907	trunc	0
COL6A1	ENST00000361866	ENST00000361866_8_uoORF_3	21_45981815-45981854	uoORF	CTG	0.0014015	0.00336547	0.0419734	0.0128062	0.0189017	0.0270977	0.00510204	0.0475199	0.0208311	0.0189147	0.0251947	0.0230919	trunc	0
COMMD5	ENST00000543949	ENST00000543949_2_uORF_1	8-:144852834-144852951	uORF	AGG	1.66e-08	5.24223e-08	0.393962	0.431985	0.372168	0.315353	0.124744	0.238447	0.126027	0.226891	0.378367	0.179027	CDS	0
COPS5	ENST00000357849	ENST00000357849_9_uORF_2	8-:67062105-67062126	uORF	ATG	0.0046387	0.0105632	0.125141	0.0700716	0.100307	0.0946565	0.0930818	0.11557	0.101324	0.0920411	0.0975439	0.100504	CDS	0
COX10	ENST00000664217	ENST00000664217_1_uORF_1	17_14069533-14069557	uORF	ATG	0.0013428	0.00322958	0.149457	0.0804598	0.343849	0.314642	0.123435	0.373057	0.198983	0.092545	0.222102	0.197005	CDS	0
COX6B1	ENST00000649813	ENST00000649813_2_uORF_1	19_35648346-35648403	uORF	GTG	0.0049956	0.0113345	0.0989213	0.0682523	0.0474607	0.0676323	0.090894	0.097824	0.108796	0.0510119	0.0705666	0.0871314	CDS	0
COX7A2L	ENST00000378669	ENST00000378669_5_uoORF_2	2-:42353336-42353343|42361089-42361187	uoORF	ATG	0.008813	0.019493	0.0876686	0.057933	0.0368481	0.0715458	0.0265581	0.166564	0.0820878	0.0911055	0.0634989	0.0915788	trunc	0
CPSF3	ENST00000238112	ENST00000238112_8_uORF_5	2_9423673-9423721	uORF	ATG	0.0001665	0.000433024	0.0265746	0.0152682	0.0143113	0.0115037	0.0182861	0.0785742	0.0209581	0.0155004	0.0169144	0.0333297	CDS	0
CREBBP	ENST00000262367	ENST00000262367_10_uORF_1	16-:3880341-3880434	uORF	TTG	0.0024206	0.00566502	0.0604102	0.036273	0.0332016	0.0148081	0.0507099	0.060658	0.033725	0.0807608	0.0361732	0.0564634	CDS	0
CREBBP	ENST00000262367	ENST00000262367_10_uORF_2	16-:3880277-3880298	uORF	ATG	8.5e-06	2.38654e-05	0.0476257	0.0700521	0.0366271	0.0214566	0.0288032	0.0472927	0.0417156	0.0542563	0.0439404	0.043017	CDS	0
CRKL	ENST00000354336	ENST00000354336_8_uORF_2	22_20917764-20917812	uORF	ATG	0.00079828	0.00195954	0.128191	0.0712598	0.0483292	0.075146	0.0880054	0.0808857	0.102557	0.0786872	0.0807316	0.0875339	CDS	0
CRY1	ENST00000008527	ENST00000008527_10_uORF_2	12-:107093196-107093238	uORF	ATG	2.84e-06	8.20267e-06	0.287129	0.0720339	0.140845	0.201788	0.0488372	0.113553	0.101635	0.263529	0.175449	0.131889	trunc	0
CRYZ	ENST00000417775	ENST00000417775_5_uoORF_2	1-:74724799-74724834|74730381-74730420|74732955-74733025	uoORF	GTG	1.21e-07	3.7076e-07	0.145802	0.2	0.0465116	0.0127021	0.0278396	0.163241	0.0931446	0.0801282	0.101254	0.0910883	CDS	0
CSDE1	ENST00000610726	ENST00000610726_4_uORF_2	1-:114750173-114750203	uORF	AAG	0.0025229	0.0058969	0.0514025	0.0308924	0.0204192	0.0220098	0.0126965	0.0334177	0.0373037	0.0300563	0.031181	0.0283686	trunc	0
CSNK1A1	ENST00000261798	ENST00000261798_10_uORF_5	5-:149551339-149551360	uORF	ATG	9.68e-05	0.000255726	0.151867	0.144297	0.152261	0.148229	0.113105	0.181118	0.18377	0.247104	0.149163	0.181274	CDS	0
CSNK1G2	ENST00000255641	ENST00000255641_13_uORF_1	19_1969549-1969633	uORF	ATG	1.08e-07	3.31586e-07	0.34608	0.3	0.0679612	0.184486	0.405128	0.253823	0.418803	0.400901	0.224632	0.369664	trunc	0
CST3	ENST00000376925	ENST00000376925_8_uoORF_1	20-:23637798-23637939	uoORF	ATC	0.0067429	0.0151151	0.567927	0.124682	0.187406	0.217822	0.035461	0.280576	0.2432	0.486772	0.274459	0.261502	trunc	0
CTBP2	ENST00000531469	ENST00000531469_5_uORF_4	10-:125039109-125039139	uORF	ATG	0.00026214	0.000670858	0.087913	0.0628068	0.103877	0.126041	0.0936028	0.0597581	0.0782059	0.0908742	0.0951594	0.0806103	trunc	0
CTDSP2	ENST00000398073	ENST00000398073_7_uORF_3	12-:57846686-57846704	uORF	ATG	0.0041152	0.00941724	0.409825	0.578027	0.606742	0.727799	0.488189	0.479592	0.705065	0.401734	0.580598	0.518645	trunc	0
CUL3	ENST00000264414	ENST00000264414_9_uORF_2	2-:224585287-224585362	uORF	AGG	2.25e-12	7.7017e-12	0.0551181	0.0372775	0.0352201	0.0366422	0.0352243	0.0872375	0.0432273	0.129016	0.0410645	0.0736762	trunc	0
CUL5	ENST00000393094	ENST00000393094_7_uORF_1	11_108009040-108009148	uORF	ATG	2.99e-09	9.62076e-09	0.238767	0.114317	0.0916745	0.0937782	0.152778	0.361974	0.184542	0.216867	0.134634	0.22904	CDS	1
CXADR	ENST00000284878	ENST00000284878_12_uoORF_2	21_17513070-17513169	uoORF	CTG	6.16e-07	1.83304e-06	0.0371797	0.00901945	0.0350545	0.0258368	0.00583251	0.0454666	0.0180276	0.0508906	0.0267726	0.0300543	trunc	0
CXXC5	ENST00000302517	ENST00000302517_8_uORF_2	5_139648513-139648531	uORF	ATG	4.02e-06	1.14941e-05	0.212417	0.0765184	0.125813	0.170717	0.0804741	0.209169	0.060191	0.178954	0.146367	0.132197	trunc	0
CXXC5	ENST00000302517	ENST00000302517_8_uORF_5	5_139648808-139648845|139680363-139680368	uORF	ACG	0.0027834	0.00648044	0.132052	0.0683883	0.0694143	0.0139733	0.0131004	0.0498567	0.0288501	0.0154578	0.0709569	0.0268163	trunc	0
CXXC5	ENST00000302517	ENST00000302517_8_uoORF_3	5_139680372-139680567	uoORF	ATT	0.0026789	0.00624607	0.102112	0.0401722	0.123644	0.0929526	0.0835933	0.0922636	0.043379	0.078478	0.0897201	0.0744285	trunc	0
CXXC5	ENST00000302517	ENST00000302517_8_uORF_4	5_139648410-139648470	uORF	CTG	0.0089033	0.0196838	0.0576741	0.0435198	0.022415	0.0170109	0.0461634	0.0991404	0.0481528	0.0796671	0.035155	0.0682809	trunc	0
CYCS	ENST00000305786	ENST00000305786_7_uoORF_1	7-:25124111-25124127|25125199-25125255	uoORF	GTG	0.0066373	0.0148932	0.0187884	0.0124331	0.022676	0.0143159	0.0191069	0.0315043	0.0342984	0.0190799	0.0170533	0.0259974	CDS	0
CYHR1	ENST00000530374	ENST00000530374_6_uORF_3	8-:144462784-144462850	uORF	ATG	0.0076896	0.0171428	0.151251	0.230503	0.158837	0.173913	0.0933333	0.100917	0.132231	0.044898	0.178626	0.092845	CDS	0
CYRIB	ENST00000522746	ENST00000522746_5_uORF_11	8-:129904522-129904540	uORF	CTG	0.0054766	0.0123856	0.0547993	0.028101	0.0182815	0.0103858	0.0127258	0.045354	0.0371212	0.0159817	0.0278919	0.0277957	CDS	0
CYRIB	ENST00000522746	ENST00000522746_5_uoORF_15	8-:129879436-129879471|129880375-129880448	uoORF	ATG	5.72e-07	1.7061e-06	0.0277487	0.0327113	0.031688	0.0267062	0.0106732	0.0370575	0.0393939	0.0114155	0.0297136	0.0246351	CDS	0
CYYR1	ENST00000652641	ENST00000652641_2_uORF_1	21-:26573013-26573067	uORF	ATG	6.74e-06	1.90388e-05	0.689949	0.406897	0.421875	0.149635	0.00884956	1.41237	0.215517	0.8	0.417089	0.609184	CDS	0
DAXX	ENST00000266000	ENST00000266000_10_uORF_1	6-:33321931-33321974|33322861-33322914	uORF	ATG	1.68e-10	5.56334e-10	0.243484	0.195816	0.136225	0.34576	0.13409	0.375092	0.257721	0.201805	0.230321	0.242177	CDS	0
DCAF11	ENST00000446197	ENST00000446197_8_uORF_2	14_24114993-24115098	uORF	ATG	6.06e-06	1.71693e-05	0.0955556	0.100867	0.224274	0.0643678	0.0446927	0.0611111	0.0653465	0.175926	0.121266	0.0867691	trunc	0
DCLRE1B	ENST00000650450	ENST00000650450_2_uORF_1	1_113905495-113905570	uORF	ATG	1.1e-06	3.23808e-06	0.453089	0.394137	0.374269	0.406863	0.734043	0.348548	0.466192	0.582822	0.407089	0.532901	trunc	0
DCUN1D3	ENST00000324344	ENST00000324344_9_uORF_1	16-:20862557-20862617	uORF	ATG	0.0051571	0.0116901	0.342298	0.548117	0.414508	0.479167	0.551724	0.32	0.361472	0.344262	0.446022	0.394365	trunc	0
DDA1	ENST00000593466	ENST00000593466_5_uoORF_2	19_17309587-17309657|17314022-17314069	uoORF	AAG	7.22e-05	0.000192579	0.394428	0.301802	0.189526	0.360927	0.106343	0.515098	0.299921	0.275794	0.311671	0.299289	trunc	0
DDX39B	ENST00000396172	ENST00000396172_6_uoORF_7	6-:31540506-31540599	uoORF	TTG	0.0012801	0.00308537	0.0447937	0.0291714	0.0193851	0.0178207	0.0317538	0.0465441	0.0149918	0.0252344	0.0277927	0.029631	CDS	0
DDX3X	ENST00000629785	ENST00000629785_2_uORF_8	X_41334195-41334216	uORF	GTG	0.0083038	0.0184056	0.0261261	0.0127173	0.0233319	0.0178113	0.0153031	0.032329	0.0220663	0.022725	0.0199966	0.0231058	trunc	0
DDX42	ENST00000578681	ENST00000578681_5_uORF_8	17_63774352-63774370	uORF	CTG	0.015625	0.0335	0.0143594	0.0107162	0.00750433	0.0208193	0.00169405	0.00594487	0.00646629	0.00620586	0.0133498	0.00507777	CDS	0
DDX46	ENST00000452510	ENST00000452510_7_uORF_3	5_134758801-134758837	uORF	ATG	2.76e-09	8.89144e-09	0.0777789	0.0277814	0.0551257	0.0509883	0.0117302	0.0873191	0.0466022	0.0817568	0.0529185	0.0568521	trunc	0
DEF8	ENST00000610455	ENST00000610455_4_uoORF_1	16_89954247-89954376|89955168-89955225	uoORF	ATG	9.73e-08	2.99205e-07	0.607386	0.358757	0.64214	0.471947	0.481967	0.395028	0.448476	0.234657	0.520058	0.390032	CDS	0
DEPDC1	ENST00000456315	ENST00000456315_7_uORF_2	1-:68497006-68497027	uORF	ATG	1.14e-05	3.18003e-05	0.231653	0.0529758	0.324484	0.284302	0.0554804	0.406746	0.114035	0.343066	0.223354	0.229832	trunc	0
DERPC	ENST00000306585	ENST00000306585_9_uORF_3	16-:69120501-69120612	uORF	ATG	2.36e-06	6.83991e-06	0.212204	0.116893	0.124175	0.109873	0.113697	0.26898	0.165167	0.146899	0.140786	0.173686	CDS	0
DERPC	ENST00000306585	ENST00000306585_9_uORF_4	16-:69120633-69120649|69121435-69121482	uORF	TTG	8.74e-06	2.45063e-05	0.192046	0.151068	0.0726073	0.127919	0.0698138	0.103398	0.182699	0.0866948	0.13591	0.110651	CDS	0
DERPC	ENST00000306585	ENST00000306585_9_uoORF_1	16-:69120424-69120631	uoORF	GTG	2.63e-15	1.17955e-14	0.292563	0.212816	0.138614	0.278132	0.507314	0.493854	0.329642	0.338952	0.230531	0.417441	CDS	0
DEXI	ENST00000331808	ENST00000331808_5_uORF_2	16-:10942047-10942095	uORF	ATG	0.00036263	0.000917128	0.67561	0.348659	0.8	0.438503	0.232877	0.0277778	0.692308	0.671233	0.565693	0.406049	CDS	0
DEXI	ENST00000331808	ENST00000331808_5_uORF_0	16-:10942339-10942432	uORF	ATG	4.34e-08	1.35032e-07	1.09756	0.89272	0.892857	0.604278	1.26027	4.5	2.05495	1.43836	0.871854	2.31339	CDS	0
DGCR8	ENST00000351989	ENST00000351989_8_uORF_5	22_20085819-20085834	uORF	ATG	0.0037	0.00851433	0.119746	0.0529634	0.125616	0.268116	0.150273	0.0375	0.164906	0.0521886	0.14161	0.101217	trunc	0
DHTKD1	ENST00000263035	ENST00000263035_9_uoORF_1	10_12069011-12069187|12081471-12081475	uoORF	CTG	2.5e-05	6.83254e-05	0.097955	0.0751425	0.0661765	0.0873453	0.0403321	0.086128	0.0449766	0.0888889	0.0816548	0.0650814	CDS	0
DHX16	ENST00000376442	ENST00000376442_8_uORF_1	6-:30672934-30672982	uORF	ATG	4.28e-08	1.33179e-07	0.0666667	0.07768	0.0674891	0.0594432	0.0843289	0.106897	0.0729193	0.0817016	0.0678197	0.0864616	trunc	0
DHX30	ENST00000441384	ENST00000441384_5_uORF_3	3_47803170-47803206	uORF	ATG	0.0010778	0.00261282	1.52329	1.28395	1.78409	1.568	0.103448	5.24074	1.62295	0.4375	1.53983	1.85116	CDS	0
DHX30	ENST00000441384	ENST00000441384_5_uORF_2	3_47805344-47805419	uORF	ATG	1.4e-08	4.42975e-08	2.44658	4.45679	2.64773	2.288	2.89655	3.7037	5.10656	1.16964	2.95977	3.21911	CDS	0
DHX32	ENST00000284690	ENST00000284690_4_uORF_1	10-:125881007-125881046	uORF	ATG	7.54e-05	0.000200658	0.14	0.125479	0.12527	0.133803	0.108197	0.0645756	0.116759	0.0909091	0.131138	0.0951102	trunc	0
DHX38	ENST00000268482	ENST00000268482_8_uORF_3	16_72093937-72093973	uORF	ATG	1.3e-06	3.81074e-06	0.0751537	0.0940819	0.0337886	0.0713805	0.0362694	0.0982428	0.0794118	0.034098	0.0686012	0.0620055	trunc	0
DHX9	ENST00000367549	ENST00000367549_4_uORF_3	1_182839366-182839429	uORF	ATG	6.51e-11	2.1725e-10	0.0493309	0.0136835	0.029634	0.0227192	0.0149583	0.0685064	0.0241566	0.0353523	0.0288419	0.0357434	CDS	0
DIDO1	ENST00000266070	ENST00000266070_8_uORF_3	20-:62937808-62937871	uORF	ATG	2.23e-11	7.51813e-11	0.0754065	0.0660995	0.0415926	0.0470894	0.0760496	0.099534	0.0643047	0.0608828	0.057547	0.0751928	trunc	0
DMTF1	ENST00000331242	ENST00000331242_12_uORF_2	7_87152459-87152555|87163494-87163617	uORF	CTG	2.71e-08	8.49398e-08	0.34179	0.213068	0.130334	0.295129	0.258189	0.316726	0.2531	0.304813	0.24508	0.283207	trunc	0
DNAJA2	ENST00000317089	ENST00000317089_10_uoORF_4	16-:46973564-46973645	uoORF	ACG	0.00039664	0.00100098	0.0236822	0.00634095	0.00852743	0.00782369	0.00860412	0.0169421	0.00757528	0.0130779	0.0115936	0.0115498	CDS	0
DNAJA2	ENST00000317089	ENST00000317089_10_uoORF_2	16-:46973499-46973619	uoORF	CTG	0.00061436	0.00152339	0.0912007	0.0299163	0.077256	0.0373554	0.016659	0.0904622	0.0311569	0.0877147	0.0589321	0.0564982	CDS	0
DNM2	ENST00000389253	ENST00000389253_9_uORF_4	19_10718087-10718105	uORF	ATG	0.0041152	0.00941724	0.0309679	0.0202087	0.0296343	0.0259939	0.0221367	0.0642824	0.0391158	0.0431783	0.0267012	0.0421783	trunc	0
DNPEP	ENST00000273075	ENST00000273075_9_uORF_3	2-:219387874-219387904	uORF	ATG	0.00010681	0.000281359	0.140809	0.148936	0.157219	0.128945	0.0280899	0.17078	0.134555	0.17619	0.143977	0.127404	trunc	0
DOHH	ENST00000427575	ENST00000427575_6_uoORF_1	19-:3496807-3496855	uoORF	CTG	0.0023023	0.00539722	0.139225	0.26	0.0671378	0.0413793	0.0769231	0.104037	0.259897	0.101493	0.126936	0.135587	trunc	0
DOLK	ENST00000372586	ENST00000372586_4_uORF_1	9-:128947549-128947591	uORF	AGG	0.00029012	0.000739812	0.0855263	0.117904	0.110454	0.0590476	0.0345395	0.159858	0.196353	0.0778816	0.0932329	0.117158	trunc	0
DPAGT1	ENST00000354202	ENST00000354202_9_uORF_11	11-:119101664-119101814	uORF	ACG	0.023103	0.0485866	0.172131	0.141524	0.103339	0.0479193	0.108586	0.416667	0.106883	0.224719	0.116228	0.214214	trunc	0
DPP9	ENST00000262960	ENST00000262960_14_uORF_2	19-:4723727-4723745	uORF	ATG	0.0033436	0.00772515	0.127639	0.0808709	0.146577	0.108744	0.0657558	0.305645	0.132676	0.235679	0.115958	0.184939	trunc	0
DPPA3	ENST00000345088	ENST00000345088_3_uoORF_1	12_7711538-7711652|7715182-7715212	uoORF	CTG	0.0015414	0.00368906	0.213884	0.0841889	0.0851648	0.0764526	0.13128	0.246732	0.140008	0.13521	0.114923	0.163308	CDS	0
DPPA3	ENST00000345088	ENST00000345088_3_uORF_3	12_7711498-7711552	uORF	TTG	0.018392	0.0391515	0.0581614	0.0225873	0.00824176	0.0030581	0.0267423	0.0680828	0.0326114	0.0577084	0.0230121	0.0462862	CDS	0
DPYSL3	ENST00000398514	ENST00000398514_7_uORF_4	5-:147453831-147453954	uORF	ATG	1.37e-05	3.80639e-05	0.0164228	0.0138992	0.010161	0.0140051	0.0160128	0.0195205	0.0158553	0.0138257	0.013622	0.0163036	CDS	0
DPYSL3	ENST00000398514	ENST00000398514_7_uORF_2	5-:147453677-147453692	uORF	ATT	0.0066639	0.0149438	0.0166541	0.00577898	0.0110752	0.00541776	0.00296904	0.0164566	0.0115988	0.013161	0.00973151	0.0110463	CDS	0
DR1	ENST00000370272	ENST00000370272_9_uORF_2	1_93346149-93346221	uORF	ATG	5.65e-05	0.000151656	0.182647	0.206415	0.129229	0.19684	0.140833	0.244538	0.132674	0.1801	0.178783	0.174536	CDS	0
DRG1	ENST00000331457	ENST00000331457_9_uoORF_2	22_31399657-31399687	uoORF	GTG	1.78e-07	5.41113e-07	0.109247	0.0762887	0.0964613	0.117665	0.0273242	0.162861	0.0862706	0.0746409	0.0999156	0.0877743	CDS	0
DROSHA	ENST00000344624	ENST00000344624_8_uORF_4	5-:31530902-31530923	uORF	TTG	0.0071683	0.0160429	0.0749716	0.100784	0.0286396	0.0405509	0.0892019	0.0988024	0.108005	0.0831354	0.0612365	0.0947861	trunc	0
DROSHA	ENST00000344624	ENST00000344624_8_uORF_2	5-:31530855-31530891	uORF	ATG	1.3e-06	3.81074e-06	0.207876	0.243561	0.104216	0.131599	0.131455	0.205589	0.227192	0.248219	0.171813	0.203114	trunc	0
DSE	ENST00000331677	ENST00000331677_7_uORF_2	6_116370985-116371051	uORF	ATG	0.0019461	0.0046124	0.165623	0.102747	0.0562613	0.147005	0.0695364	0.244	0.0606061	0.413043	0.117909	0.196796	trunc	0
DSE	ENST00000331677	ENST00000331677_7_uoORF_1	6_116371070-116371121|116399197-116399254	uoORF	CTG	0.0068162	0.0152748	0.227557	0.151577	0.210526	0.274047	0.149007	0.084	0.189899	0.320652	0.215927	0.185889	trunc	0
DSEL	ENST00000310045	ENST00000310045_9_uORF_3	18-:67515286-67515364	uORF	ATG	1.36e-09	4.4197e-09	0.150579	0.193124	0.0928382	0.18328	0.0767045	0.0461812	0.0578406	0.108597	0.154955	0.0723309	CDS	0
DSEL	ENST00000310045	ENST00000310045_9_uORF_1	18-:67515387-67515483	uORF	ATG	2.45e-07	7.40945e-07	0.355212	0.187058	0.202918	0.299035	0.109375	0.442274	0.268209	0.443439	0.261056	0.315824	CDS	0
DSP	ENST00000379802	ENST00000379802_8_uORF_2	6_7541875-7541890	uORF	ATG	0.0016	0.0038159	0.0291796	0.00940415	0.0180551	0.010854	0.00300661	0.0191025	0.00700035	0.015873	0.0168732	0.0112456	CDS	0
DUSP14	ENST00000614411	ENST00000614411_1_uORF_1	17_37512228-37512258	uORF	CTG	0.00022783	0.000586538	0.326021	0.23942	0.410208	0.246436	0.117745	0.138386	0.280899	0.355603	0.305521	0.223158	CDS	0
DUT	ENST00000455976	ENST00000455976_6_uoORF_3	15_48332199-48332265	uoORF	GTG	0.0016526	0.00393846	0.0658997	0.0178419	0.0168939	0.0380161	0.0160835	0.0535241	0.042193	0.0797932	0.0346629	0.0478985	CDS	0
DYNLL1	ENST00000549989	ENST00000549989_1_uORF_4	12_120496114-120496159	uORF	ATG	0.023462	0.0493062	0.0213281	0.00762003	0.0076139	0.0171308	0.0124607	0.0531187	0.0218287	0.0227491	0.0134232	0.0275393	CDS	0
EBAG9	ENST00000614147	ENST00000614147_1_uORF_2	8_109540190-109540424	uORF	ATG	0	0	0.381159	0.129512	0.169421	0.226619	0.211864	0.570815	0.149864	0.697674	0.226678	0.407555	CDS	0
ECSIT	ENST00000270517	ENST00000270517_12_uORF_1	19-:11529065-11529122	uORF	ATG	4.29e-07	1.28678e-06	0.410898	0.434211	0.289017	0.388715	0.145833	0.773626	0.328374	0.446764	0.38071	0.423649	trunc	0
ECT2	ENST00000392692	ENST00000392692_8_uORF_3	3_172750732-172750807	uORF	ATG	6.11e-06	1.73076e-05	0.0172548	0.0121389	0.00987714	0.0166276	0.0126113	0.0394103	0.0247269	0.0318411	0.0139746	0.0271474	CDS	0
ECT2	ENST00000392692	ENST00000392692_8_uORF_2	3_172750791-172750824	uORF	ATG	0.00012244	0.00032175	0.0264945	0.031346	0.015418	0.0360264	0.0187933	0.0354409	0.0391851	0.0296343	0.0273212	0.0307634	CDS	0
EDEM2	ENST00000374492	ENST00000374492_8_uORF_2	20-:35147273-35147315	uORF	ATG	1.11e-05	3.09901e-05	0.196554	0.301887	0.207254	0.419558	0.077044	0.210526	0.200317	0.0692641	0.281313	0.139288	CDS	0
EFNB1	ENST00000204961	ENST00000204961_5_uORF_1	X_68829156-68829222	uORF	ATG	0.000607	0.00150603	0.426612	0.131078	0.0895954	0.142857	0.25	0.165289	0.319149	0.257282	0.197536	0.24793	trunc	0
EFNB2	ENST00000646441	ENST00000646441_1_uORF_1	13-:106535381-106535456	uORF	GTG	0.0012803	0.00308559	0.254881	0.15507	0.108974	0.117329	0.176938	0.524675	0.178602	0.232353	0.159063	0.278142	CDS	0
EFR3A	ENST00000254624	ENST00000254624_10_uORF_1	8_131904241-131904277	uORF	ATG	6.91e-06	1.95058e-05	0.354651	0.159091	0.29375	0.422857	0.321285	1.12698	0.15027	0.475	0.307587	0.518385	trunc	0
EID1	ENST00000530028	ENST00000530028_3_uORF_1	15_48878136-48878157	uORF	TTG	0.0083038	0.0184056	0.018836	0.0153447	0.0121854	0.0190849	0.0081097	0.0260739	0.0198092	0.0112022	0.0163628	0.0162987	CDS	0
EIF1AD	ENST00000533544	ENST00000533544_6_uORF_2	11-:66002059-66002101	uORF	CTG	0.0056493	0.0127623	0.0870886	0.0737847	0.0649762	0.0932722	0.128	0.0466744	0.0824891	0.126806	0.0797804	0.0959923	CDS	0
EIF2S2	ENST00000374980	ENST00000374980_3_uoORF_1	20-:34105541-34105545|34112095-34112226	uoORF	ATG	1.21e-06	3.55617e-06	0.172438	0.0597303	0.0731316	0.0888062	0.0445975	0.176032	0.0935145	0.150543	0.0985266	0.116172	trunc	0
EIF3K	ENST00000248342	ENST00000248342_9_uoORF_3	19_38619243-38619282	uoORF	CTG	0.0016684	0.00397417	0.0699783	0.032733	0.0454219	0.0752932	0.0319476	0.0812476	0.0786591	0.0842346	0.0558566	0.0690222	CDS	0
EIF4EBP2	ENST00000373218	ENST00000373218_5_uORF_1	10_70404167-70404242	uORF	CTG	0.00023207	0.000597086	0.182102	0.0949853	0.17302	0.129404	0.114646	0.105817	0.0887976	0.124245	0.144878	0.108376	CDS	0
EIF5B	ENST00000289371	ENST00000289371_11_uORF_4	2_99337497-99337509	uORF	GTG	0.020285	0.0429347	0.0149266	0.00384003	0.0127469	0.0200229	0.00240798	0.0163867	0.0122624	0.0278197	0.0128841	0.0147192	CDS	0
ELAVL1	ENST00000407627	ENST00000407627_7_uoORF_1	19-:7991748-7991820	uoORF	ATA	2.48e-06	7.18202e-06	0.0505324	0.0381295	0.0474816	0.0364026	0.027518	0.026793	0.0486947	0.0264234	0.0431365	0.0323573	CDS	0
ELF2	ENST00000379550	ENST00000379550_5_uORF_2	4-:139137801-139137867|139139412-139139439	uORF	ATG	0.00023511	0.000604695	0.109524	0.137127	0.179153	0.0588235	0.120183	0.0955807	0.114322	0.143035	0.121157	0.11828	CDS	0
ELMOD2	ENST00000323570	ENST00000323570_8_uORF_2	4_140524219-140524279	uORF	CTG	1.79e-06	5.21318e-06	0.193826	0.040264	0.0695142	0.0492108	0.0357143	0.203233	0.00605275	0.18984	0.0882038	0.10871	trunc	0
ELOC	ENST00000523815	ENST00000523815_5_uORF_3	8-:73964529-73964604	uORF	CTG	3.36e-06	9.66264e-06	0.0295533	0.012221	0.0333895	0.0359174	0.00578496	0.0206989	0.0160021	0.0344603	0.0277703	0.0192366	CDS	0
ELOVL6	ENST00000302274	ENST00000302274_8_uORF_1	4-:110198494-110198578	uORF	ATG	0.00084395	0.00206766	0.161592	0.114615	0.0969719	0.114805	0.0826554	0.205556	0.129023	0.0917473	0.121996	0.127245	trunc	0
ELOVL6	ENST00000302274	ENST00000302274_8_uoORF_2	4-:110198300-110198432	uoORF	GTG	0.0040034	0.00919084	0.0481657	0.0530589	0.0288392	0.0317021	0.0185486	0.0537037	0.0516094	0.0207469	0.0404415	0.0361522	trunc	0
ELP5	ENST00000396628	ENST00000396628_6_uoORF_2	17_7252428-7252506	uoORF	ATG	0.0013861	0.00333098	0.108643	0.128035	0.0462287	0.125356	0.109399	0.153727	0.133763	0.0821918	0.102066	0.11977	trunc	0
EMC6	ENST00000397133	ENST00000397133_2_uORF_1	17_3668826-3668862	uORF	ATG	1.37e-06	4.01031e-06	0.600488	0.750557	0.973464	0.827627	0.746667	1.0232	0.823316	0.754634	0.788034	0.836954	CDS	0
ENAH	ENST00000366844	ENST00000366844_7_uoORF_4	1-:225567411-225567414|225652685-225652961	uoORF	GTG	0.00040952	0.00103277	0.0397842	0.0168756	0.0329173	0.0417633	0.0166457	0.0823813	0.0136406	0.0340797	0.0328351	0.0366868	trunc	0
ENOPH1	ENST00000273920	ENST00000273920_8_uORF_1	4_82430660-82430825	uORF	GTG	0.00065149	0.00161205	0.118431	0.0635371	0.0641509	0.0905203	0.0488269	0.218595	0.117078	0.169138	0.0841599	0.13841	trunc	0
EP300	ENST00000263253	ENST00000263253_9_uORF_1	22_41092595-41092703	uORF	AGG	1.1e-12	3.78296e-12	0.0446913	0.0330327	0.0421703	0.0353736	0.0149446	0.0503083	0.0510204	0.056745	0.038817	0.0432546	CDS	0
EPN1	ENST00000270460	ENST00000270460_11_uORF_2	19_55675401-55675425	uORF	ATG	0.0087001	0.0192549	0.237974	0.321363	0.106071	0.181065	0.0429907	0.250645	0.171135	0.251234	0.211618	0.179001	CDS	0
EPN1	ENST00000270460	ENST00000270460_11_uORF_3	19_55675312-55675396	uORF	GTG	0.0017334	0.00412464	0.0400643	0.00943644	0.0136426	0.016568	0.0350467	0.2547	0.0345912	0.0740242	0.0199278	0.0995904	CDS	0
EPN2	ENST00000314728	ENST00000314728_9_uORF_2	17_19282004-19282073	uORF	ATG	8.22e-07	2.43392e-06	0.284267	0.275773	0.279683	0.36953	0.215054	0.149194	0.342322	0.276471	0.302313	0.24576	trunc	0
EPS15	ENST00000371733	ENST00000371733_8_uoORF_1	1-:51519203-51519242	uoORF	ATG	0.00071349	0.00176011	0.165969	0.0880626	0.057104	0.0762174	0.123114	0.219488	0.116017	0.100407	0.0968383	0.139756	trunc	0
ERRFI1	ENST00000377482	ENST00000377482_10_uoORF_1	1-:8015609-8015639	uoORF	ATG	0.0030987	0.00717915	0.0442804	0.0637255	0.0456621	0.0375561	0.0313034	0.0526572	0.0538476	0.0343558	0.047806	0.043041	trunc	0
ERVH48-1	ENST00000447535	ENST00000447535_1_uORF_1	21-:42925492-42925555	uORF	GTG	0.00076876	0.0018904	0.21009	0.0825688	0.198014	0.162437	0.172283	0.328049	0.146637	0.205524	0.163277	0.213123	CDS	0
ERVH48-1	ENST00000447535	ENST00000447535_1_uORF_6	21-:42925614-42925629	uORF	CTG	0.0037	0.00851433	0.0691085	0.0584862	0.0689013	0.0767766	0.0427148	0.0737805	0.0117489	0.0338704	0.0683182	0.0405286	CDS	0
ERVH48-1	ENST00000447535	ENST00000447535_1_uORF_4	21-:42925357-42925375	uORF	ATG	0.0057352	0.0129434	0.149274	0.0573394	0.220981	0.0926396	0.0213574	0.137195	0.0743498	0.103584	0.130059	0.0841217	CDS	0
ERVH48-1	ENST00000447535	ENST00000447535_1_uORF_2	21-:42919216-42919267	uORF	CTG	0.00042578	0.00107147	0.154803	0.347477	0.209187	0.187817	0.133365	0.0707317	0.124484	0.151595	0.224821	0.120044	CDS	0
ERVMER34-1	ENST00000440542	ENST00000440542_1_uORF_1	4-:52745856-52745907	uORF	ATG	1.04e-07	3.19539e-07	0.0944662	0.0786667	0.0932203	0.209641	0.136223	0.00358423	0.149016	0.077551	0.118999	0.0915935	CDS	0
ESD	ENST00000378720	ENST00000378720_8_uoORF_2	13-:46791403-46791420|46793396-46793433	uoORF	ATT	0.00067336	0.00166433	0.0781016	0.0564768	0.0502835	0.045257	0.0151668	0.0981387	0.0422658	0.0709516	0.0575297	0.0566307	trunc	0
ETF1	ENST00000360541	ENST00000360541_10_uORF_4	5-:138543096-138543204	uORF	ATG	0.0057084	0.0128889	0.0710575	0.0403097	0.0682348	0.0740525	0.0555004	0.0969628	0.0361138	0.0932768	0.0634136	0.0704634	CDS	0
EXO1	ENST00000366548	ENST00000366548_8_uORF_1	1_241848754-241848802	uORF	ATG	5.72e-08	1.77328e-07	0.299625	0.172322	0.155709	0.212544	0.08	0.507299	0.238538	0.471795	0.21005	0.324408	trunc	0
EXO1	ENST00000366548	ENST00000366548_8_uORF_3	1_241848245-241848281	uORF	TTG	2.69e-05	7.34017e-05	0.189139	0.0439122	0.157439	0.125436	0.102667	0.105839	0.0724907	0.179487	0.128981	0.115121	trunc	0
EXOC1	ENST00000381295	ENST00000381295_7_uORF_1	4_55853850-55853871	uORF	CTG	0.021752	0.0459036	0.149045	0.0313862	0.109375	0.0720721	0.0211538	0.0544815	0.0310408	0.0383877	0.0904695	0.036266	trunc	0
EXOC2	ENST00000230449	ENST00000230449_9_uoORF_1	6-:637787-637861|693018-693028	uoORF	ACG	0.016154	0.034581	0.024911	0.0140399	0.0102494	0.0132534	0.00954274	0.0769231	0.0246721	0.0183633	0.0156134	0.0323753	CDS	0
EXTL3	ENST00000220562	ENST00000220562_9_uORF_7	8_28701519-28701648	uORF	ATG	1.19e-09	3.87196e-09	0.13032	0.0603248	0.0406404	0.129848	0.111285	0.148448	0.109554	0.0455408	0.0902834	0.103707	trunc	0
EXTL3	ENST00000220562	ENST00000220562_9_uORF_2	8_28713508-28713550|28715584-28715590	uORF	ATG	0.00030875	0.000785268	0.275559	0.383604	0.188424	0.512648	0.122257	0.147099	0.417834	0.28463	0.340059	0.242955	trunc	0
EXTL3	ENST00000220562	ENST00000220562_9_uORF_6	8_28716012-28716033	uORF	ATG	0.0087039	0.0192575	0.12681	0.0672854	0.0874384	0.190556	0.0909091	0.0553306	0.156051	0.142315	0.118023	0.111151	trunc	0
EXTL3	ENST00000220562	ENST00000220562_9_uORF_3	8_28715707-28715902	uORF	ATG	1.9e-11	6.41297e-11	0.163668	0.300077	0.162562	0.386172	0.39185	0.174089	0.264968	0.265655	0.25312	0.27414	trunc	0
EXTL3	ENST00000220562	ENST00000220562_9_uORF_1	8_28715667-28715718	uORF	ATG	0.00028294	0.000722195	0.258885	0.379737	0.310345	0.505902	0.286834	0.306343	0.357325	0.220114	0.363717	0.292654	trunc	0
FAM168B	ENST00000389915	ENST00000389915_4_uORF_1	2-:131082650-131082657|131093213-131093347	uORF	ACG	0.00050642	0.00126519	0.131625	0.0683611	0.0816034	0.038822	0.0348906	0.0834763	0.0530703	0.101597	0.0801029	0.0682584	CDS	0
FAM210A	ENST00000402563	ENST00000402563_5_uORF_1	18-:13682098-13682105|13726328-13726414	uORF	CTG	0.013293	0.0288379	0.185935	0.0417469	0.108563	0.0497981	0.0467836	0.335868	0.179344	0.154211	0.0965107	0.179052	CDS	0
FAM220A	ENST00000313324	ENST00000313324_9_uORF_1	7-:6331214-6331235|6348572-6348758	uORF	ATG	2.07e-12	7.09137e-12	0.599265	0.252708	0.948718	0.309309	0.263566	1.07759	0.262865	0.543147	0.5275	0.536791	CDS	0
FAM222B	ENST00000452648	ENST00000452648_8_uoORF_5	17-:28766638-28766707|28812208-28812250	uoORF	ACG	0.010975	0.0240461	0.0428475	0.0257353	0.0484581	0.0418376	0.0136876	0.177122	0.0347826	0.0575342	0.0397196	0.0707816	trunc	0
FAM72A	ENST00000367128	ENST00000367128_8_uORF_2	1-:206202452-206202509	uORF	ACG	0.0045957	0.010471	0.234944	0.107678	0.184168	0.0738255	0.0326975	0.216327	0.168055	0.153374	0.150154	0.142613	trunc	0
FAM72B	ENST00000369390	ENST00000369390_7_uORF_6	1-:121183806-121183845	uORF	ATG	7.54e-05	0.000200658	0.115909	0.13138	0.113487	0.233043	0.0353261	0.00408163	0.163734	0.0929487	0.148455	0.0740225	trunc	0
FAM72C	ENST00000584486	ENST00000584486_6_uORF_7	1-:143971457-143971496	uORF	ATG	7.54e-05	0.000200658	0.0903721	0.103964	0.0955679	0.175163	0.031477	0.00323625	0.129462	0.0785908	0.116267	0.0606914	CDS	0
FAM72C	ENST00000584486	ENST00000584486_6_uORF_1	1-:143971568-143971625	uORF	ACG	0.0045957	0.010471	0.186651	0.0860135	0.157895	0.0575163	0.0290557	0.171521	0.134301	0.135501	0.122019	0.117595	CDS	0
FAM72D	ENST00000400889	ENST00000400889_3_uORF_7	1_145096492-145096531	uORF	ATG	7.54e-05	0.000200658	0.089057	0.103964	0.0958333	0.172458	0.031477	0.00323625	0.127533	0.0785908	0.115328	0.0602092	CDS	0
FAM72D	ENST00000400889	ENST00000400889_3_uORF_1	1_145096363-145096420	uORF	ACG	0.0045957	0.010471	0.183935	0.0860135	0.158333	0.0566281	0.0290557	0.171521	0.1323	0.135501	0.121227	0.117095	CDS	0
FASTKD1	ENST00000453153	ENST00000453153_7_uORF_3	2-:169573741-169573798	uORF	ATG	0.00030399	0.000773632	0.156831	0.0523256	0.0633484	0.13	0.114726	0.291209	0.142085	0.102804	0.100626	0.162706	trunc	0
FASTKD1	ENST00000453153	ENST00000453153_7_uORF_1	2-:169572070-169572136	uORF	ATG	1.24e-06	3.64105e-06	0.283751	0.254845	0.215686	0.266667	0.537671	0.159341	0.333825	0.352804	0.255237	0.34591	trunc	0
FASTKD5	ENST00000380266	ENST00000380266_4_uORF_2	20-:3149113-3149245	uORF	CTG	3.77e-09	1.20986e-08	0.165954	0.130952	0.0469653	0.0447154	0.0407986	0.12938	0.0709743	0.125272	0.0971467	0.0916063	CDS	0
FBXO11	ENST00000403359	ENST00000403359_8_uORF_2	2-:47906420-47906471	uORF	ATG	8.06e-06	2.26713e-05	0.142857	0.0942813	0.122857	0.141176	0.0421793	0.172414	0.0738049	0.119954	0.125293	0.102088	CDS	0
FBXO42	ENST00000375592	ENST00000375592_8_uoORF_1	1-:16305913-16305919|16315168-16315423	uoORF	ATG	2.26e-08	7.1056e-08	0.172577	0.196123	0.155738	0.105263	0.0852174	0.0698925	0.100129	0.132411	0.157425	0.0969125	trunc	0
FDPS	ENST00000356657	ENST00000356657_10_uORF_2	1_155308975-155309074	uORF	ATG	0	0	0.0583055	0.0469061	0.0382664	0.0434143	0.0293542	0.049021	0.0363954	0.0424123	0.0467231	0.0392957	trunc	0
FEM1A	ENST00000269856	ENST00000269856_5_uORF_1	19_4791747-4791798	uORF	ATG	0.00031822	0.000808371	0.160697	0.215596	0.100887	0.131802	0.119593	0.149893	0.20885	0.0811843	0.152246	0.13988	trunc	0
FEZ1	ENST00000278919	ENST00000278919_8_uoORF_5	11-:125489748-125489814	uoORF	ATC	0.013024	0.0282837	0.0551724	0.0540326	0.0333807	0.0508736	0.00518135	0.0944206	0.0357895	0.126506	0.0483648	0.0654744	CDS	0
FEZ1	ENST00000278919	ENST00000278919_8_uORF_4	11-:125496158-125496176	uORF	ATG	0.00097656	0.00237901	0.111296	0.0544299	0.0582386	0.0354573	0.00518135	0.124464	0.00210526	0.060241	0.0648555	0.0479978	CDS	0
FGF12	ENST00000454309	ENST00000454309_6_uORF_2	3-:192408854-192408896	uORF	ATG	5.46e-09	1.7459e-08	0.734205	0.284211	0.638655	0.546392	0.131579	0.00763359	0.175824	0.190909	0.550866	0.126486	trunc	0
FGFR1	ENST00000447712	ENST00000447712_7_uORF_10	8-:38468473-38468503	uORF	ACG	0.0014242	0.00341722	0.0352726	0.0109719	0.0104524	0.034153	0.0123305	0.139614	0.0141899	0.0356836	0.0227125	0.0504545	CDS	0
FGFR4	ENST00000292408	ENST00000292408_9_uORF_2	5_177086991-177087077|177089549-177089586	uORF	CTG	9.36e-05	0.000247719	0.0488319	0.0482998	0.027027	0.0333165	0.0226516	0.0699881	0.0717391	0.0418769	0.0393688	0.0515639	CDS	0
FHIP1A	ENST00000435205	ENST00000435205_6_uORF_1	4_151454737-151454776	uORF	ATG	0.00020353	0.000526292	0.163769	0.206093	0.111901	0.119593	0.0730159	0.0970149	0.116016	0.0321543	0.150339	0.0795504	trunc	0
FIS1	ENST00000223136	ENST00000223136_5_uORF_3	7-:101245036-101245057	uORF	ATG	8.5e-06	2.38654e-05	0.408651	0.432684	0.462898	0.477236	0.15932	0.572271	0.437086	0.225627	0.445367	0.348576	CDS	0
FKBP4	ENST00000001008	ENST00000001008_6_uORF_2	12_2795029-2795068	uORF	GTG	0.013024	0.0282837	0.00887984	0.0046244	0.00744639	0.00370438	0.00416209	0.016615	0.00385102	0.0142472	0.00616375	0.00971883	CDS	0
FMNL2	ENST00000288670	ENST00000288670_14_uORF_1	2_152335327-152335408	uORF	ATG	0.00059476	0.00147754	0.200155	0.100646	0.127337	0.122546	0.0732861	0.176634	0.0735294	0.2	0.137671	0.130862	trunc	0
FOXM1	ENST00000342628	ENST00000342628_6_uoORF_3	12-:2874477-2874504	uoORF	ATG	5.95e-07	1.77289e-06	0.335283	0.424784	0.185778	0.295476	0.0482921	0.253096	0.398519	0.463878	0.31033	0.290946	CDS	0
FUT8	ENST00000673929	ENST00000673929_1_uORF_1	14_65412915-65413044	uORF	ATG	1.42e-06	4.15543e-06	0.361111	0.129853	0.308357	0.334895	0.0849057	0.363636	0.175347	0.315789	0.283554	0.23492	trunc	0
FUT8	ENST00000673929	ENST00000673929_1_uORF_2	14_65455647-65455683	uORF	ATG	0.00075177	0.00185064	0.195652	0.255689	0.146974	0.236534	0.490566	0.339394	0.0815972	0.196172	0.208712	0.276932	trunc	0
FUZ	ENST00000313777	ENST00000313777_9_uORF_1	19-:49813142-49813163	uORF	ATG	6.4e-05	0.000171066	0.418816	0.570297	0.25	0.488121	0.330855	0.199507	0.357965	0.160757	0.431809	0.262271	trunc	0
FZD3	ENST00000240093	ENST00000240093_8_uORF_3	8_28502678-28502867	uORF	TTG	6.54e-09	2.08714e-08	0.121372	0.14948	0.114286	0.143179	0.130742	0.230999	0.144658	0.130621	0.132079	0.159255	CDS	0
FZD3	ENST00000240093	ENST00000240093_8_uORF_1	8_28499957-28499972	uORF	ATG	0.0081	0.017977	0.204749	0.30056	0.230857	0.287486	0.106007	0.232489	0.384154	0.276231	0.255913	0.24972	CDS	0
GALNT17	ENST00000333538	ENST00000333538_10_uORF_1	7_71132174-71132231	uORF	ATG	0.0037689	0.00866811	0.11047	0.0412433	0.0266753	0.0753691	0.0780985	0.170347	0.0878713	0.106529	0.0634395	0.110711	CDS	0
GBA2	ENST00000378103	ENST00000378103_7_uORF_1	9-:35748784-35748952	uORF	ACG	0.00039483	0.000996672	0.333333	0.303777	0.108734	0.126654	0.425781	0.479452	0.241218	0.428016	0.218125	0.393617	trunc	0
GCHFR	ENST00000260447	ENST00000260447_6_uoORF_1	15_40764122-40764216|40765826-40765855	uoORF	CTG	0.022237	0.04689	0.142741	0.13247	0.211127	0.183832	0.138504	0.382716	0.0553746	0.0997067	0.167543	0.169075	CDS	0
GCNT1	ENST00000376730	ENST00000376730_5_uORF_1	9_76500954-76501032	uORF	ATG	8.12e-05	0.000215662	0.184601	0.28373	0.27512	0.212341	0.0869565	0.0583333	0.318271	0.215686	0.238948	0.169812	trunc	0
GDF3	ENST00000329913	ENST00000329913_4_uORF_2	12-:7695745-7695772	uORF	CTG	0.00055625	0.00138457	0.00400496	0.000154631	0.00324575	0.00314607	0.00428354	0.0131905	0.00693326	0.00887379	0.00263785	0.00832029	CDS	0
GDI2	ENST00000380191	ENST00000380191_9_uoORF_3	10-:5813250-5813319	uoORF	GTG	1.52e-11	5.13926e-11	0.104654	0.0392756	0.0467938	0.0373936	0.0296705	0.0920184	0.0346041	0.0808833	0.0570292	0.0592941	trunc	0
GEMIN6	ENST00000281950	ENST00000281950_8_uORF_2	2_38778239-38778278	uORF	ATG	3.11e-06	8.95865e-06	0.354436	0.166962	0.179487	0.45007	0.226333	0.236501	0.219295	0.276271	0.287739	0.2396	CDS	0
GFM2	ENST00000509430	ENST00000509430_5_uORF_2	5-:74766943-74767051	uORF	TTG	0.00019935	0.000515756	0.154481	0.0977918	0.150259	0.112967	0.17189	0.243101	0.0770278	0.191523	0.128875	0.170885	trunc	0
GGPS1	ENST00000282841	ENST00000282841_9_uORF_5	1_235328581-235328719	uORF	ATG	4.81e-11	1.61068e-10	0.543811	0.360609	0.381098	0.276968	0.559459	0.57967	0.436015	0.316354	0.390621	0.472875	trunc	0
GIPC1	ENST00000393033	ENST00000393033_9_uORF_3	19-:14491700-14491736	uORF	CTG	0.0014036	0.00336972	0.0957071	0.0606752	0.0686071	0.0910736	0.0653557	0.0911839	0.096241	0.0358285	0.0790157	0.0721523	CDS	0
GJC1	ENST00000592524	ENST00000592524_6_uORF_2	17-:44830127-44830148	uORF	ATG	0.010003	0.0220219	0.101294	0.100911	0.12394	0.0862069	0.0385	0.0550029	0.132646	0.147849	0.103088	0.0934996	CDS	0
GJC1	ENST00000592524	ENST00000592524_6_uoORF_1	17-:44805677-44805837|44807393-44807469|44830061-44830203	uoORF	CTG	2.52e-13	8.76003e-13	0.119912	0.0850911	0.0649207	0.135682	0.0745	0.252779	0.0866847	0.126344	0.101401	0.135077	CDS	0
GLS	ENST00000338435	ENST00000338435_8_uORF_5	2_190880985-190881060	uORF	ATC	0.021292	0.0449913	0.124706	0.024485	0.0518263	0.0364754	0.0266955	0.0951949	0.0364181	0.0422535	0.0593731	0.0501405	trunc	0
GMPR2	ENST00000557854	ENST00000557854_5_uORF_5	14_24232984-24233059	uORF	ATG	2.03e-07	6.16217e-07	0.042048	0.0744636	0.0369108	0.032908	0.0429983	0.0552795	0.0265214	0.0589868	0.0465826	0.0459465	trunc	0
GNA12	ENST00000275364	ENST00000275364_8_uORF_3	7-:2844167-2844206	uORF	ATG	0.00020353	0.000526292	0.0997479	0.044164	0.108031	0.105366	0.030185	0.267897	0.0579407	0.106316	0.0893271	0.115585	CDS	0
GNAI3	ENST00000369851	ENST00000369851_7_uoORF_2	1_109548655-109548736	uoORF	CTG	0.014931	0.0322101	0.0479541	0.00892642	0.0215699	0.0237547	0.0188048	0.0769856	0.0170114	0.0398418	0.0255513	0.0381609	CDS	0
GNAQ	ENST00000286548	ENST00000286548_9_uORF_2	9-:78031535-78031652	uORF	ATG	3.93e-05	0.000106238	0.108402	0.036665	0.0234139	0.0633224	0.046133	0.138065	0.0482149	0.0955414	0.0579508	0.0819885	CDS	0
GNB1	ENST00000378609	ENST00000378609_9_uORF_1	1-:1839195-1839228	uORF	ATG	9.54e-07	2.81623e-06	0.0796125	0.123313	0.0666378	0.0979542	0.038423	0.0621518	0.0934488	0.0596194	0.0918794	0.0634108	trunc	0
GNB1	ENST00000378609	ENST00000378609_9_uORF_3	1-:1891046-1891064	uORF	ATG	0.0001286	0.00033697	0.0556273	0.0378407	0.0413962	0.0685544	0.0337454	0.0860732	0.0558745	0.0511448	0.0508547	0.0567095	trunc	0
GNB2	ENST00000303210	ENST00000303210_9_uoORF_2	7_100676198-100676273	uoORF	CTG	0.0015537	0.00371758	0.0596608	0.0262732	0.0764798	0.0472545	0.0160249	0.0838037	0.0295522	0.083159	0.0524171	0.0531349	trunc	0
GNPAT	ENST00000366647	ENST00000366647_9_uORF_1	1_231241225-231241339	uORF	ATG	1.2e-11	4.06388e-11	0.659281	0.444728	0.426402	0.375789	0.208791	0.544139	0.316148	0.672199	0.47655	0.435319	CDS	0
GOLM2	ENST00000299957	ENST00000299957_11_uORF_1	15_44288818-44288839	uORF	ACG	0.0049044	0.0111328	0.238817	0.161663	0.0341615	0.0823529	0.148889	0.0819398	0.0707351	0.0508083	0.129248	0.088093	CDS	0
GOLT1B	ENST00000229314	ENST00000229314_10_uoORF_3	12_21501837-21501927	uoORF	CTG	0.015922	0.0341117	0.081869	0.055501	0.0530179	0.0430663	0.0482456	0.0344203	0.062412	0.106942	0.0583636	0.0630049	CDS	0
GPAT4	ENST00000396987	ENST00000396987_7_uORF_1	8_41598381-41598468	uORF	ATG	0.0072056	0.0161215	0.421778	0.322289	0.19896	0.342142	0.223642	0.250847	0.290267	0.485265	0.321292	0.312505	trunc	0
GPBP1	ENST00000424459	ENST00000424459_7_uORF_6	5_57175831-57175858	uORF	ATG	0.00077275	0.00189862	0.18747	0.250153	0.300908	0.205752	0.181172	0.12987	0.228248	0.207547	0.236071	0.186709	CDS	0
GPBP1	ENST00000424459	ENST00000424459_7_uoORF_12	5_57176339-57176400|57214073-57214144	uoORF	CTG	0.010891	0.0238782	0.135904	0.093578	0.128405	0.0962389	0.273535	0.146568	0.16329	0.0919811	0.113531	0.168843	CDS	0
GPBP1	ENST00000424459	ENST00000424459_7_uORF_14	5_57175916-57175979	uORF	ATG	0.00016768	0.000436016	0.0506024	0.048318	0.0389105	0.045354	0.273535	0.0296846	0.150179	0.125	0.0457962	0.1446	CDS	0
GPBP1	ENST00000424459	ENST00000424459_7_uORF_5	5_57175807-57175825	uORF	ATG	0.0041152	0.00941724	0.29253	0.299083	0.130999	0.109513	0.486679	0.159555	0.312872	0.308962	0.208031	0.317017	CDS	0
GPBP1	ENST00000424459	ENST00000424459_7_uORF_3	5_57175898-57175916	uORF	ATG	0.0041152	0.00941724	0.324337	0.325994	0.24773	0.452434	0.369449	0.463822	0.275328	0.318396	0.337624	0.356749	CDS	0
GPBP1	ENST00000424459	ENST00000424459_7_uORF_1	5_57175980-57176019	uORF	ATG	1.43e-05	3.97046e-05	0.444337	0.417737	0.258106	0.345133	0.422735	0.218924	0.513111	0.176887	0.366328	0.332914	CDS	0
GPBP1	ENST00000424459	ENST00000424459_7_uORF_9	5_57175769-57175811	uORF	ACG	0.006751	0.015131	0.176386	0.105199	0.119326	0.045354	0.124334	0.16141	0.315256	0.233491	0.111566	0.208623	CDS	0
GPBP1	ENST00000424459	ENST00000424459_7_uORF_7	5_57176237-57176249	uORF	ATG	0.015625	0.0335	0.177831	0.237309	0.166018	0.132743	0.50444	0.120594	0.241955	0.108491	0.178475	0.24387	CDS	0
GPBP1	ENST00000424459	ENST00000424459_7_uORF_4	5_57175466-57175484	uORF	ATG	0.0001286	0.00033697	0.237108	0.209174	0.259403	0.248894	0.195382	0.64564	0.498212	0.382075	0.238645	0.430327	CDS	0
GPC4	ENST00000370828	ENST00000370828_4_uORF_1	X-:133415151-133415280	uORF	TTG	0.0033524	0.00774487	0.0555605	0.018403	0.0408437	0.0205269	0.0131815	0.0777801	0.0159566	0.0612698	0.0338335	0.042047	trunc	0
GPC6	ENST00000377047	ENST00000377047_9_uoORF_1	13_93227325-93227481	uoORF	CTG	0.0044904	0.010243	0.108587	0.0588679	0.0645161	0.0816492	0.034687	0.056213	0.0543101	0.0601202	0.0784051	0.0513326	trunc	0
GPN2	ENST00000374135	ENST00000374135_9_uORF_1	1-:26890125-26890209	uORF	CTG	3.98e-05	0.00010756	0.227318	0.0313076	0.150635	0.241681	0.0918822	0.24659	0.183984	0.198551	0.162736	0.180252	trunc	0
GPR160	ENST00000355897	ENST00000355897_10_uORF_0	3_170038994-170039043|170079773-170079835	uORF	CTG	0.00016414	0.000427114	2.06538	0.857513	0.624031	0.952991	0.707207	1.16216	1.18319	1.42045	1.12498	1.11825	CDS	0
GPR176	ENST00000561100	ENST00000561100_2_uORF_1	15-:39920160-39920229	uORF	ATG	8.73e-06	2.44806e-05	0.150527	0.117925	0.13986	0.202756	0.0662393	0.108404	0.0733753	0.174455	0.152767	0.105618	CDS	0
GPT2	ENST00000340124	ENST00000340124_9_uORF_2	16_46884383-46884434	uORF	ATG	4.55e-06	1.29866e-05	0.0663199	0.0306396	0.0360206	0.0482673	0.0277651	0.0964147	0.0329257	0.0898058	0.0453119	0.0617278	trunc	0
GRPR	ENST00000380289	ENST00000380289_3_uORF_1	X_16123643-16123679	uORF	ATG	2.96e-06	8.53916e-06	0.133512	0.156371	0.0633235	0.0923997	0.207921	0.104885	0.127547	0.0411985	0.111402	0.120388	trunc	0
GRPR	ENST00000380289	ENST00000380289_3_uORF_4	X_16123818-16123842	uORF	ATG	0.0013428	0.00322958	0.023453	0.0449531	0.0169125	0.0157323	0.0181518	0.0158046	0.0309434	0.00187266	0.0252627	0.0166931	trunc	0
GSE1	ENST00000253458	ENST00000253458_12_uoORF_2	16_85613356-85613395	uoORF	ATG	0.00027765	0.000709187	0.0643798	0.0390909	0.0371395	0.0186551	0.0254798	0.0468227	0.0412991	0.0191496	0.0398163	0.0331878	trunc	0
GTF3C6	ENST00000329970	ENST00000329970_8_uORF_1	6_110958714-110958744	uORF	ATG	0.00043303	0.00108888	0.1474	0.059387	0.12125	0.208738	0.0550982	0.165003	0.0757358	0.110505	0.134194	0.101585	CDS	0
GULP1	ENST00000409609	ENST00000409609_5_uoORF_5	2_188477668-188477719	uoORF	GTG	0.0043847	0.0100089	0.108713	0.0726185	0.109863	0.0869565	0.038961	0.0899533	0.077135	0.103044	0.0945378	0.0772734	trunc	0
H1-0	ENST00000340857	ENST00000340857_4_uoORF_1	22_37805497-37805548	uoORF	CTG	3.25e-05	8.83941e-05	0.11777	0.0645519	0.103807	0.0792192	0.044102	0.141684	0.0785551	0.106603	0.0913372	0.0927359	CDS	0
H2AC4	ENST00000615868	ENST00000615868_2_uORF_1	6-:26033570-26033597	uORF	GTG	0.001511	0.00361896	0.0479765	0.0334386	0.0349196	0.0380735	0.068662	0.0451658	0.0672805	0.0396658	0.0386021	0.0551935	trunc	0
H2AC6	ENST00000314088	ENST00000314088_6_uORF_1	6_26124197-26124227	uORF	AGG	0.0012622	0.00304398	0.0447386	0.0204971	0.0142431	0.0203525	0.0636386	0.0327482	0.0349166	0.0164536	0.0249578	0.0369392	trunc	1
H2AJ	ENST00000544848	ENST00000544848_2_uORF_1	12_14774445-14774457	uORF	CTG	0.015625	0.0335	0.0406143	0.0269908	0.00654932	0.0570673	0.0522841	0.0284676	0.0524809	0.0554248	0.0328054	0.0471644	trunc	0
H2AZ1	ENST00000296417	ENST00000296417_6_uORF_3	4-:99950188-99950227	uORF	GTG	0.00026077	0.000667527	0.185419	0.113544	0.186877	0.169694	0.0273721	0.131711	0.114203	0.110381	0.163883	0.0959166	trunc	0
H2BC12	ENST00000356950	ENST00000356950_2_uORF_1	6-:27146810-27146834	uORF	CTG	6.1e-05	0.0001633	0.0118338	0.00318004	0.00728761	0.00580793	0.0111161	0.010202	0.013035	0.0128452	0.00702733	0.0117996	CDS	1
H4C8	ENST00000634956	ENST00000634956_1_uORF_1	6-:26285501-26285522	uORF	TTG	0.00017188	0.000446422	0.0294225	0.0277097	0.0106055	0.0242685	0.0587434	0.0197833	0.0336255	0.0138726	0.0230016	0.0315062	CDS	0
HAPLN3	ENST00000562889	ENST00000562889_5_uORF_3	15-:88895482-88895533	uORF	ATC	0.0048596	0.0110396	0.113295	0.0739532	0.104995	0.039548	0.0616822	0.0875	0.0352221	0.00826446	0.0829479	0.0481672	trunc	0
HCFC1	ENST00000369984	ENST00000369984_4_uORF_2	X-:153970951-153970987	uORF	ATG	3.21e-08	1.00279e-07	0.0385023	0.0330144	0.03442	0.0451411	0.0278134	0.00769031	0.0249092	0.0171026	0.0377695	0.0193789	CDS	0
HDAC7	ENST00000080059	ENST00000080059_12_uORF_1	12-:47819847-47819877	uORF	CTG	0.0056287	0.0127188	0.209105	0.0924751	0.137143	0.122449	0.123288	0.303846	0.0732782	0.143885	0.140293	0.161074	trunc	0
HDGFL3	ENST00000299633	ENST00000299633_7_uORF_2	15-:83207716-83207743	uORF	ATG	3.14e-08	9.81547e-08	0.4444	0.228342	0.29904	0.272377	0.0643127	0.280208	0.155136	0.189427	0.31104	0.172271	CDS	0
HDHD2	ENST00000300605	ENST00000300605_11_uoORF_4	18-:47136377-47136449|47150377-47150401	uoORF	CTG	0.0019407	0.00460035	0.247208	0.155597	0.234014	0.22293	0.0625	0.378495	0.295436	0.346626	0.214937	0.270764	trunc	0
HDHD3	ENST00000374180	ENST00000374180_4_uORF_2	9-:113374443-113374494	uORF	ATG	0.0047973	0.0109023	0.237024	0.539519	0.268293	0.139098	0.220721	0.114754	0.148571	0.169399	0.295983	0.163361	CDS	0
HDHD3	ENST00000374180	ENST00000374180_4_uORF_1	9-:113374474-113374529|113375452-113375535	uORF	ATG	0.00027756	0.000709019	0.276817	0.604811	0.271777	0.191729	0.148649	0.147541	0.165714	0.0163934	0.336283	0.119574	CDS	0
HEATR1	ENST00000366582	ENST00000366582_8_uORF_2	1-:236604464-236604482	uORF	ATG	0.00097656	0.00237901	0.0280872	0.00760827	0.029129	0.0211298	0.0122891	0.0200935	0.0175736	0.0168323	0.0214886	0.0166971	CDS	0
HELLS	ENST00000348459	ENST00000348459_10_uORF_2	10_94545834-94545855	uORF	CTG	0.0018383	0.00436291	0.022805	0.0225225	0.0109991	0.0120615	0.0242398	0.039244	0.0163923	0.0258161	0.017097	0.026423	trunc	0
HERPUD2	ENST00000396081	ENST00000396081_5_uORF_1	7-:35694433-35694499	uORF	TTG	0.00037163	0.000939566	0.308962	0.204678	0.141823	0.418345	0.0972222	0.0766871	0.179012	0.165563	0.268452	0.129621	trunc	0
HEXIM1	ENST00000332499	ENST00000332499_4_uORF_1	17_45148595-45148652	uORF	CTG	6.05e-06	1.71443e-05	0.2103	0.119854	0.151365	0.133166	0.110473	0.208791	0.149555	0.14532	0.153671	0.153535	CDS	0
HIC2	ENST00000407464	ENST00000407464_7_uORF_1	22_21417383-21417407	uORF	ATG	0.004773	0.0108496	0.210579	0.458835	0.17146	0.193634	0.262397	0.185366	0.320459	0.230894	0.258627	0.249779	trunc	0
HIF1A	ENST00000394997	ENST00000394997_5_uORF_4	14_61695727-61695748	uORF	GTG	0.0020752	0.00489264	0.00713741	0.00670884	0.00328003	0.00381204	0.00420757	0.0109116	0.00946761	0.0125403	0.00523458	0.00928175	CDS	0
HIGD2A	ENST00000274787	ENST00000274787_3_uoORF_1	5_176388757-176388841	uoORF	ATG	4.49e-12	1.52994e-11	0.368315	0.213759	0.358799	0.389896	0.140321	0.401034	0.205751	0.261715	0.332692	0.252205	trunc	0
HIKESHI	ENST00000278483	ENST00000278483_8_uORF_1	11_86302355-86302370	uORF	CTG	0.0081	0.017977	0.0727147	0.0230947	0.0926797	0.0298151	0.0472561	0.0580305	0.0558867	0.0924195	0.054576	0.0633982	CDS	0
HIPK1	ENST00000369558	ENST00000369558_5_uORF_2	1_113929849-113929921	uORF	ATG	1.45e-05	4.02446e-05	0.0636923	0.0369755	0.0796915	0.0515416	0.0429293	0.0904762	0.0338548	0.0830357	0.0579752	0.062574	trunc	0
HIRA	ENST00000263208	ENST00000263208_5_uORF_2	22-:19431602-19431695	uORF	ATG	4.1e-06	1.17182e-05	0.393389	0.189405	0.189815	0.251714	0.153684	0.508869	0.172325	0.192483	0.256081	0.25684	trunc	0
HMGA1	ENST00000447654	ENST00000447654_5_uORF_1	6_34240746-34240770	uORF	ATC	0.0013428	0.00322958	0.164051	0.177177	0.267521	0.179541	0.0220832	0.198152	0.164597	0.167268	0.197073	0.138025	CDS	0
HMGA1	ENST00000447654	ENST00000447654_5_uoORF_2	6_34237209-34237317|34240736-34240784	uoORF	ATT	0.0034753	0.00802058	0.0305788	0.019032	0.0207575	0.0163196	0.0257637	0.188257	0.0196151	0.0355813	0.021672	0.0673042	CDS	0
HMGA2	ENST00000403681	ENST00000403681_7_uORF_5	12_65824774-65824894	uORF	GTG	0.00079951	0.00196239	0.0547636	0.0216369	0.0489749	0.0416932	0.0340245	0.0692545	0.0523819	0.0736196	0.0417672	0.0573201	CDS	0
HMGXB4	ENST00000216106	ENST00000216106_6_uORF_4	22_35257507-35257555	uORF	ATG	4.86e-07	1.45418e-06	0.111263	0.0247108	0.0738758	0.121714	0.0500501	0.0935484	0.108181	0.085282	0.0828909	0.0842654	CDS	0
HNRNPA2B1	ENST00000356674	ENST00000356674_8_uORF_4	7-:26200593-26200716	uORF	GTG	0.00063732	0.00157792	0.0794235	0.0255912	0.0454944	0.0508268	0.0181968	0.119373	0.0366886	0.0665545	0.050334	0.0602031	trunc	0
HNRNPD	ENST00000313899	ENST00000313899_12_uORF_1	4-:82373709-82373883	uORF	GTG	1.07e-12	3.68109e-12	0.120579	0.0442851	0.0569125	0.0442204	0.0459783	0.215096	0.0525632	0.124866	0.0664993	0.109626	CDS	0
HNRNPD	ENST00000313899	ENST00000313899_12_uORF_3	4-:82373905-82373959	uORF	ATT	2.31e-06	6.69699e-06	0.0329816	0.0128095	0.0120949	0.0148732	0.00879832	0.0295776	0.0169353	0.0191902	0.0181898	0.0186254	CDS	0
HNRNPDL	ENST00000295470	ENST00000295470_10_uORF_3	4-:82429878-82429926	uORF	CTG	0.0034462	0.00795592	0.00608558	0.00508702	0.0077765	0.00837989	0.00380779	0.00614487	0.00445563	0.00454959	0.00683225	0.00473947	trunc	0
HNRNPF	ENST00000443950	ENST00000443950_6_uORF_3	10-:43394630-43394666	uORF	GTG	0.017028	0.0363722	0.0248823	0.0218449	0.00793418	0.0103127	0.0336509	0.0106138	0.0175834	0.0196581	0.0162435	0.0203765	trunc	0
HNRNPF	ENST00000443950	ENST00000443950_6_uORF_1	10-:43396536-43396575	uORF	ATG	1.45e-07	4.42586e-07	0.0837256	0.068679	0.0592125	0.0742703	0.045206	0.0792091	0.0680603	0.056044	0.0714719	0.0621299	trunc	0
HNRNPU	ENST00000640218	ENST00000640218_2_uORF_12	1-:244864356-244864437	uORF	ACG	0.0046777	0.0106454	0.042955	0.0171919	0.0353947	0.0306735	0.0154399	0.0530724	0.0273696	0.0705723	0.0315538	0.0416136	CDS	0
HNRNPUL2	ENST00000301785	ENST00000301785_7_uORF_12	11-:62727368-62727413	uORF	CTG	0.0011222	0.00271686	0.02222	0.0104403	0.0172348	0.0148639	0.00282268	0.0511687	0.0116931	0.0226231	0.0161897	0.0220769	trunc	0
HNRNPUL2	ENST00000301785	ENST00000301785_7_uoORF_6	11-:62726884-62727391	uoORF	CTG	2.51e-08	7.87555e-08	0.151583	0.0528068	0.0672156	0.0854226	0.0813446	0.138029	0.0704789	0.141753	0.089257	0.107901	trunc	0
HOMER1	ENST00000334082	ENST00000334082_11_uORF_1	5-:79513409-79513505	uORF	CTG	8.6e-06	2.41299e-05	0.508855	0.242031	0.539286	0.425595	0.321608	0.130435	0.362963	0.980769	0.428942	0.448944	trunc	0
HSF1	ENST00000528838	ENST00000528838_6_uORF_2	8_144291612-144291699	uORF	ATG	7.58e-08	2.34074e-07	0.299705	0.23242	0.263821	0.333333	0.0679964	0.492552	0.157914	0.221436	0.28232	0.234974	CDS	0
HSPA4	ENST00000304858	ENST00000304858_7_uORF_2	5_133052088-133052181	uORF	TTG	0.0005597	0.00139281	0.0509413	0.0201012	0.0213928	0.0222103	0.0172023	0.0620424	0.0309335	0.0458927	0.0286614	0.0390177	trunc	0
HSPA4	ENST00000304858	ENST00000304858_7_uORF_1	5_133052071-133052242	uORF	CTG	4.75e-06	1.35443e-05	0.0770144	0.0461465	0.0581347	0.0352475	0.0340403	0.0687934	0.0344429	0.0737678	0.0541358	0.0527611	trunc	0
HTT	ENST00000355072	ENST00000355072_11_uORF_4	4_3074700-3074766	uORF	ATG	8.61e-09	2.73612e-08	0.0747543	0.0472366	0.0471432	0.0532738	0.0188943	0.059507	0.0412987	0.0373166	0.055602	0.0392542	trunc	0
IDH1	ENST00000345146	ENST00000345146_7_uORF_6	2-:208254997-208255036	uORF	CTG	0.0019822	0.00468507	0.0336618	0.0118129	0.0112354	0.0177831	0.0179837	0.0341868	0.0199391	0.0199304	0.0186233	0.02301	trunc	0
IER2	ENST00000588173	ENST00000588173_1_uoORF_1	19_13153115-13153220	uoORF	TTG	4.2e-07	1.2603e-06	0.129859	0.0544646	0.107585	0.131683	0.0732436	0.120183	0.0802139	0.120525	0.105898	0.0985414	trunc	0
IFNGR2	ENST00000381995	ENST00000381995_5_uORF_1	21_33403454-33403478	uORF	ATG	6.42e-07	1.90866e-06	0.784615	0.518703	1.36816	1.11602	0.379845	0.79476	0.616393	1.12245	0.946875	0.728362	trunc	0
IFT27	ENST00000433985	ENST00000433985_7_uORF_4	22-:36776069-36776108	uORF	ATG	1.77e-05	4.88715e-05	0.172273	0.0895722	0.117196	0.0552147	0.0790155	0.0950872	0.137755	0.149402	0.108564	0.115315	CDS	0
IFT27	ENST00000433985	ENST00000433985_7_uORF_5	22-:36775835-36775979	uORF	TTG	0.0068126	0.0152679	0.106364	0.0474599	0.0887185	0.104294	0.0284974	0.131537	0.0345805	0.135458	0.0867091	0.0825183	CDS	0
IGDCC3	ENST00000327987	ENST00000327987_9_uORF_1	15-:65377935-65377977	uORF	ATG	3.05e-05	8.30316e-05	0.187599	0.191432	0.139706	0.247694	0.0662359	0.297459	0.249064	0.26975	0.191608	0.220627	CDS	0
IGDCC3	ENST00000327987	ENST00000327987_9_uORF_2	15-:65377842-65377929	uORF	ATG	1.35e-05	3.75189e-05	0.0847833	0.0475234	0.0744485	0.0790514	0.0662359	0.0313901	0.00686642	0.0982659	0.0714517	0.0506896	CDS	0
IGF2BP1	ENST00000290341	ENST00000290341_8_uORF_1	17_48997596-48997677	uORF	CTG	0.00052864	0.0013191	0.0215725	0.0108667	0.0102127	0.0145954	0.0112318	0.0493	0.0218774	0.0238574	0.0143118	0.0265667	CDS	0
IGFBP4	ENST00000269593	ENST00000269593_5_uORF_1	17_40443504-40443558	uORF	ATG	2.6e-06	7.51913e-06	0.185854	0.0574046	0.0970739	0.0895028	0.0382728	0.187069	0.0657328	0.121127	0.107459	0.10305	trunc	0
IGSF3	ENST00000369483	ENST00000369483_5_uORF_1	1-:116666735-116666852	uORF	ATG	6.99e-11	2.33109e-10	1.56897	1.984	0.914729	1.3125	1.32979	1.28058	1.04023	0.691781	1.44505	1.08559	trunc	0
IGSF3	ENST00000369483	ENST00000369483_5_uORF_2	1-:116666891-116666924	uORF	CTG	0.00020414	0.00052773	0.649425	0.376	0.53876	0.227679	0.425532	0.726619	0.614943	0.438356	0.447966	0.551362	trunc	0
IGSF3	ENST00000369483	ENST00000369483_5_uORF_4	1-:116666531-116666588	uORF	ATG	1.74e-07	5.29448e-07	0.494253	0.484	0.217054	0.486607	0.404255	0.0791367	0.376437	0.609589	0.420479	0.367354	trunc	0
IGSF8	ENST00000368086	ENST00000368086_5_uoORF_1	1-:160098414-160098546	uoORF	ATG	2.56e-09	8.25077e-09	0.0793276	0.0556857	0.0431677	0.0411659	0.0561415	0.0634741	0.0326826	0.0579915	0.0548367	0.0525724	CDS	0
IMP3	ENST00000314852	ENST00000314852_2_uoORF_1	15-:75640151-75640220	uoORF	ATG	0.0025211	0.00589316	0.0238889	0.0133151	0.0152188	0.0288945	0.0132236	0.0433404	0.0150959	0.0127877	0.0203293	0.0211119	trunc	0
INPPL1	ENST00000298229	ENST00000298229_7_uORF_1	11_72224874-72224970	uORF	ACG	0.018161	0.0386823	0.167327	0.0734848	0.0776942	0.0747768	0.0613288	0.037182	0.101031	0.0942529	0.0983207	0.0734486	trunc	0
INSR	ENST00000302850	ENST00000302850_10_uORF_1	19-:7293919-7294087	uORF	CTG	5.6e-05	0.000150327	0.0793899	0.0525025	0.0593985	0.0789288	0.0306407	0.09375	0.0982067	0.0780399	0.0675549	0.0751593	trunc	0
INTS13	ENST00000261191	ENST00000261191_12_uORF_1	12-:26937880-26937940	uORF	ATG	0.00028238	0.000720828	0.141736	0.0550459	0.0504087	0.0637993	0.077325	0.230971	0.0635682	0.149792	0.0777475	0.130414	trunc	0
IPMK	ENST00000373935	ENST00000373935_4_uORF_1	10-:58267695-58267767	uORF	ATG	2.6e-06	7.51913e-06	0.193825	0.0973282	0.177515	0.208955	0.113065	0.713755	0.0727869	0.409496	0.169406	0.327276	trunc	0
IPO7	ENST00000379719	ENST00000379719_8_uORF_1	11_9384690-9384747	uORF	ATG	4.98e-07	1.48917e-06	0.0583802	0.0238534	0.038438	0.0470244	0.00722687	0.0872195	0.0196462	0.0292862	0.041924	0.0358447	trunc	0
IREB2	ENST00000258886	ENST00000258886_13_uoORF_3	15_78438324-78438356|78439794-78439807	uoORF	ATG	0.0027276	0.00635456	0.129745	0.0989736	0.0758971	0.0553447	0.020558	0.0982606	0.0228676	0.0591133	0.0899901	0.0501999	CDS	0
IRF6	ENST00000367021	ENST00000367021_8_uoORF_1	1-:209801354-209801416|209801971-209802043|209805946-209806064	uoORF	TTG	0.00033838	0.000857798	0.214388	0.160207	0.0553097	0.162791	0.357895	0.625442	0.157366	0.591667	0.148174	0.433092	trunc	0
IRX2	ENST00000302057	ENST00000302057_6_uORF_1	5-:2751439-2751607	uORF	CTG	5.7e-10	1.86771e-09	0.0641204	0.0344986	0.0751121	0.0577689	0.0263158	0.129425	0.0120069	0.0737101	0.057875	0.0603644	CDS	0
ISG20L2	ENST00000313146	ENST00000313146_10_uORF_3	1-:156728272-156728365	uORF	ATG	0.0024578	0.00574657	0.237396	0.156677	0.0732484	0.170507	0.20603	0.112329	0.0569456	0.0580357	0.159457	0.108335	trunc	0
ITGB3BP	ENST00000489099	ENST00000489099_5_uoORF_3	1-:63508553-63508570|63523128-63523156	uoORF	GTG	0.019078	0.0405499	0.269468	0.124211	0.193437	0.0929152	0.17233	0.0732218	0.146211	0.105978	0.170008	0.124435	trunc	0
ITGB5	ENST00000296181	ENST00000296181_9_uORF_1	3-:124887128-124887185	uORF	GTG	1.88e-09	6.08595e-09	0.0716756	0.0549645	0.0448622	0.06	0.0442008	0.127074	0.0569111	0.0750429	0.0578756	0.0758073	CDS	0
ITPR2	ENST00000381340	ENST00000381340_8_uoORF_1	12-:26832773-26832791	uoORF	ATG	0.010385	0.0228235	0.0807226	0.0675676	0.0522523	0.039048	0.029511	0.0274136	0.051489	0.0368715	0.0598976	0.0363213	CDS	0
ITSN1	ENST00000399353	ENST00000399353_5_uORF_5	21_33642554-33642662	uORF	ACG	8.11e-05	0.000215435	0.0543193	0.0364569	0.0332046	0.0292802	0.0375188	0.0955807	0.0833813	0.0886957	0.0383153	0.0762941	CDS	0
IVNS1ABP	ENST00000367498	ENST00000367498_8_uORF_5	1-:185317071-185317182	uORF	CTG	0.0035033	0.00808201	0.298548	0.0987438	0.220484	0.0892449	0.0419815	0.461115	0.132231	0.397676	0.176755	0.258251	CDS	0
IWS1	ENST00000295321	ENST00000295321_9_uORF_3	2-:127526221-127526287	uORF	ATC	0.02063	0.0436428	0.0240479	0.0148092	0.00869934	0.00585709	0.019384	0.027417	0.0159391	0.0251142	0.0133534	0.0219636	CDS	0
IWS1	ENST00000295321	ENST00000295321_9_uORF_1	2-:127526329-127526479	uORF	TTG	1.29e-06	3.7837e-06	0.0461327	0.0203053	0.0292807	0.0203046	0.0247685	0.105339	0.0206648	0.0466406	0.0290058	0.0493532	CDS	0
JADE2	ENST00000681547	ENST00000681547_2_uORF_3	5_134525694-134525796	uORF	ATG	0.0029931	0.00695099	0.0949495	0.104294	0.135021	0.535088	0.589041	0.723005	0.391549	0.301653	0.217338	0.501312	trunc	0
JARID2	ENST00000341776	ENST00000341776_7_uORF_3	6_15246109-15246199	uORF	GTG	1.09e-05	3.0452e-05	0.0591312	0.0646123	0.0218247	0.0282019	0.0473271	0.0849555	0.0488532	0.0382141	0.0434425	0.0548375	CDS	0
JARID2	ENST00000341776	ENST00000341776_7_uoORF_5	6_15246495-15246543	uoORF	ATG	1.71e-07	5.20374e-07	0.0300597	0.0434135	0.0277302	0.0259427	0.0150272	0.0172385	0.036049	0.0278807	0.0317865	0.0240488	CDS	0
JARID2	ENST00000341776	ENST00000341776_7_uORF_7	6_15246289-15246310	uORF	ATG	0.00054399	0.00135509	0.0181594	0.0200474	0.0108696	0.0166719	0.00880905	0.00676344	0.021922	0.00477676	0.016437	0.0105678	CDS	0
JARID2	ENST00000341776	ENST00000341776_7_uORF_10	6_15246386-15246449	uORF	CTG	0.00087881	0.00215072	0.00502368	0.00785642	0.0026532	0.00155812	0.00302271	0.0160013	0.0109188	0.0132579	0.00427285	0.0108002	CDS	0
JARID2	ENST00000341776	ENST00000341776_7_uORF_9	6_15246445-15246499	uORF	ATA	0.0012108	0.00292315	0.00893556	0.0160515	0.00838754	0.00537551	0.00932723	0.00684593	0.0121289	0.0148177	0.00968752	0.0107799	CDS	0
JUN	ENST00000371222	ENST00000371222_4_uORF_1	1-:58783194-58783266	uORF	CTG	0.0046468	0.01058	0.01868	0.0183639	0.0168453	0.0761773	0.0500424	0.0549348	0.0739531	0.103788	0.0325166	0.0706795	trunc	0
KANK1	ENST00000382303	ENST00000382303_5_uoORF_4	9_676911-676995	uoORF	ATG	8.12e-05	0.000215662	0.0945423	0.149623	0.0336617	0.0746004	0.0407166	0.0677686	0.0171951	0.0458015	0.0881067	0.0428704	CDS	0
KBTBD2	ENST00000304056	ENST00000304056_9_uORF_1	7-:32879821-32879914	uORF	ATG	1.49e-06	4.35549e-06	0.136918	0.166667	0.143219	0.150452	0.0853293	0.130435	0.135856	0.200528	0.149314	0.138037	CDS	0
KCNMB4	ENST00000258111	ENST00000258111_5_uORF_1	12_70366349-70366487	uORF	ATG	1.35e-06	3.95454e-06	1.04079	1.17081	0.901887	0.486607	0.403774	0.837696	1.12165	0.577586	0.900022	0.735176	CDS	0
KDM4B	ENST00000611640	ENST00000611640_4_uoORF_1	19_5016281-5016339|5032865-5032939	uoORF	CTG	0.0088556	0.0195813	0.0356285	0.0367601	0.026506	0.0394331	0.000987167	0.10157	0.051934	0.0679245	0.0345819	0.0556039	trunc	0
KDM5A	ENST00000399788	ENST00000399788_7_uORF_1	12-:389167-389197	uORF	ATG	0.011182	0.0244777	0.0766355	0.0592272	0.0338726	0.0364827	0.0390016	0.0999075	0.0521971	0.0273396	0.0515545	0.0546114	trunc	0
KDM5C	ENST00000375401	ENST00000375401_8_uORF_3	X-:53225154-53225196	uORF	ATG	1.3e-07	3.9788e-07	0.0546131	0.0888134	0.0607207	0.0737827	0.0657629	0.118229	0.0735184	0.0912763	0.0694825	0.0871967	trunc	0
KDM5C	ENST00000375401	ENST00000375401_8_uORF_5	X-:53224993-53225047	uORF	ACG	0.0033757	0.00779624	0.0394002	0.0352037	0.0257658	0.0216883	0.0735506	0.0111979	0.0199751	0.0204631	0.0305145	0.0312967	trunc	0
KDM5C	ENST00000375401	ENST00000375401_8_uORF_4	X-:53224935-53224947	uORF	ATG	0.015625	0.0335	0.0446536	0.0705861	0.0232432	0.079949	0.0475916	0.0208333	0.0126813	0.0271944	0.054608	0.0270752	trunc	0
KEAP1	ENST00000393623	ENST00000393623_6_uoORF_1	19-:10500010-10500076	uoORF	CTG	3.58e-05	9.7063e-05	0.131662	0.113172	0.166347	0.078064	0.115028	0.157818	0.139895	0.124378	0.122311	0.13428	trunc	0
KIAA0930	ENST00000336156	ENST00000336156_10_uoORF_1	22-:45240687-45240825	uoORF	AGG	0.00012892	0.000337717	0.580615	0.458647	0.40184	0.35249	0.34434	0.261905	0.251852	0.282443	0.448398	0.285135	trunc	0
KIAA1191	ENST00000298569	ENST00000298569_9_uORF_0	5-:176361647-176361743	uORF	TTG	4.17e-11	1.39829e-10	4.07117	2.08239	2.0303	3.5015	5.60714	3.725	3.80579	2.5122	2.92134	3.91253	CDS	0
KIF1B	ENST00000676179	ENST00000676179_1_uORF_3	1_10210659-10210740	uORF	CTG	2.76e-13	9.58863e-13	0.201836	0.0738586	0.0984615	0.03663	0.0593539	0.121526	0.0707045	0.124324	0.102697	0.0939772	trunc	0
KIF5B	ENST00000302418	ENST00000302418_5_uORF_1	10-:32056245-32056317	uORF	GTG	1.63e-05	4.50867e-05	0.23285	0.139787	0.132859	0.165077	0.0465969	0.350028	0.135695	0.266385	0.167643	0.199676	trunc	0
KIF5B	ENST00000302418	ENST00000302418_5_uORF_2	10-:32056173-32056200	uORF	ATG	1.87e-06	5.43968e-06	0.0565633	0.046234	0.0463727	0.0539333	0.0371728	0.0104568	0.0651589	0.0627202	0.0507758	0.0438772	trunc	0
KIF5C	ENST00000435030	ENST00000435030_6_uORF_5	2_148875250-148875283	uORF	ATG	3.95e-08	1.23094e-07	0.12129	0.0672359	0.0768577	0.123964	0.0192218	0.16156	0.0741453	0.0768025	0.0973369	0.0829324	CDS	0
KLC2	ENST00000316924	ENST00000316924_9_uORF_1	11_66257782-66257824	uORF	ATG	0.00012612	0.000331093	0.101955	0.0712383	0.0865922	0.0899796	0.0588942	0.0778499	0.0351975	0.01359	0.0874412	0.0463829	CDS	0
KLHL15	ENST00000328046	ENST00000328046_8_uORF_1	X-:24024878-24024899	uORF	ATG	0.00054399	0.00135509	0.269527	0.150665	0.258912	0.126689	0.161663	0.138173	0.154664	0.298828	0.201448	0.188332	trunc	0
KLHL7	ENST00000339077	ENST00000339077_10_uORF_2	7_23105887-23105950	uORF	CTG	0.00064202	0.00158915	0.0627665	0.0146504	0.0274275	0.0305933	0.0124899	0.0692384	0.0291603	0.0554603	0.0338594	0.0415872	CDS	0
KPNB1	ENST00000290158	ENST00000290158_9_uORF_4	17_47650106-47650121	uORF	ATG	0.0016	0.0038159	0.0844374	0.0629156	0.0723046	0.0576596	0.0611329	0.0899605	0.0762424	0.089401	0.0693293	0.0791842	trunc	0
KRT8	ENST00000552551	ENST00000552551_5_uORF_4	12-:52949749-52949842	uORF	ATG	1.69e-08	5.33639e-08	0.0034443	0.00208679	0.0027486	0.00180576	0.000567962	0.000576337	0.00039919	0.000633894	0.00252136	0.000544346	CDS	0
KRT8	ENST00000552551	ENST00000552551_5_uoORF_3	12-:52904965-52905004	uoORF	CTG	0.023033	0.0484742	0.0203686	0.00534561	0.0059144	0.00701369	0.00296889	0.00974284	0.00858972	0.0209841	0.00966056	0.0105714	CDS	0
LAPTM4A	ENST00000175091	ENST00000175091_5_uoORF_2	2-:20051507-20051609	uoORF	TTG	0.0082032	0.0181923	0.0387901	0.0263553	0.0301102	0.0247024	0.0244814	0.0425875	0.0467002	0.0481519	0.0299895	0.0404802	CDS	0
LARP7	ENST00000509061	ENST00000509061_5_uORF_1	4_112637190-112637214	uORF	ATG	0.00025528	0.00065393	0.105288	0.0638412	0.0866337	0.154696	0.0456376	0.119641	0.0714042	0.133089	0.102615	0.092443	trunc	0
LCMT1	ENST00000399069	ENST00000399069_8_uoORF_4	16_25111843-25111894	uoORF	ATG	0.00088564	0.0021667	0.172502	0.104406	0.223455	0.143501	0.0377358	0.325658	0.113986	0.150206	0.160966	0.156896	trunc	0
LEPROTL1	ENST00000321250	ENST00000321250_13_uoORF_3	8_30095486-30095528|30101897-30101903	uoORF	GTG	0.0085622	0.0189654	0.0599778	0.0618433	0.038206	0.0827512	0.00561535	0.160137	0.0552108	0.0833333	0.0606946	0.0760741	CDS	0
LGR4	ENST00000379214	ENST00000379214_9_uORF_3	11-:27472661-27472718	uORF	CTG	2.15e-06	6.24178e-06	0.164614	0.0642115	0.0767375	0.0691076	0.0941828	0.287262	0.15663	0.135016	0.0936677	0.168273	CDS	1
LGR4	ENST00000379214	ENST00000379214_9_uORF_2	11-:27472639-27472669	uORF	ATG	0.00016254	0.000422988	0.16523	0.0550834	0.0912162	0.135927	0.0925999	0.217071	0.0976599	0.140505	0.111864	0.136959	CDS	1
LGR4	ENST00000379214	ENST00000379214_9_uORF_6	11-:27472445-27472511	uORF	ATG	3.1e-07	9.33666e-07	0.0422824	0.0223481	0.0149614	0.0215103	0.0494658	0.0103986	0.0397816	0.0499451	0.0252756	0.0373978	CDS	1
LHFPL2	ENST00000380345	ENST00000380345_7_uORF_6	5-:78632308-78632329	uORF	ATG	0.000729	0.0017961	0.314076	0.157191	0.118252	0.119241	0.0259366	0.111765	0.143583	0.186312	0.17719	0.116899	trunc	0
LHFPL2	ENST00000380345	ENST00000380345_7_uORF_4	5-:78510322-78510352	uORF	ATG	2.47e-05	6.75118e-05	0.411765	0.0652174	0.354756	0.292683	0.0576369	0.147059	0.208386	0.304183	0.281105	0.179316	trunc	0
LINGO1	ENST00000355300	ENST00000355300_7_uoORF_1	15-:77615896-77615900|77632309-77632359	uoORF	ATG	0.00020971	0.000541221	0.186272	0.13317	0.105868	0.166667	0.0639445	0.0898329	0.123305	0.0923913	0.147994	0.0923685	trunc	0
LMBR1	ENST00000353442	ENST00000353442_10_uORF_2	7-:156892999-156893047	uORF	ATG	0.0010194	0.00247864	0.285825	0.158522	0.311054	0.221875	0.232639	0.272727	0.226415	0.449704	0.244319	0.295371	trunc	0
LRIG1	ENST00000273261	ENST00000273261_8_uORF_1	3-:66500784-66500820	uORF	ATG	0.00012612	0.000331093	0.276738	0.218737	0.138592	0.192083	0.194411	0.172997	0.347129	0.334612	0.206538	0.262287	trunc	0
LRP6	ENST00000261349	ENST00000261349_9_uORF_1	12-:12266759-12266837	uORF	ATG	0.00039816	0.00100473	0.0711856	0.0341131	0.0316154	0.0432862	0.037415	0.02582	0.0288612	0.0742188	0.0450501	0.0415787	CDS	0
LRP6	ENST00000261349	ENST00000261349_9_uORF_2	12-:12266910-12266961	uORF	ATG	0.00019301	0.000500016	0.0800837	0.0532814	0.0420095	0.0481449	0.0218659	0.0816469	0.0442018	0.0400391	0.0558799	0.0469384	CDS	0
LRRC8A	ENST00000372600	ENST00000372600_9_uORF_1	9_128886027-128886105	uORF	ATG	9.89e-08	3.04061e-07	0.263903	0.299324	0.102215	0.269701	0.0817637	0.40546	0.284276	0.318107	0.233786	0.272401	trunc	0
LRRN1	ENST00000319331	ENST00000319331_4_uoORF_9	3_3844603-3844654	uoORF	TTG	0.00086397	0.00211564	0.0135354	0.0125178	0.00256049	0.0131108	0.0139211	0.00323699	0.00558366	0.00433422	0.0104311	0.006769	CDS	0
LRRN1	ENST00000319331	ENST00000319331_4_uORF_1	3_3799516-3799919|3844363-3844539	uORF	CTG	2.45e-13	8.51771e-13	0.13891	0.0737601	0.0719498	0.0524434	0.0628384	0.327861	0.062734	0.114375	0.0842657	0.141952	CDS	0
LRRN1	ENST00000319331	ENST00000319331_4_uORF_4	3_3844539-3844599	uORF	ATG	3.44e-07	1.03447e-06	0.0229541	0.0251941	0.0271412	0.0264601	0.0232019	0.00462428	0.0222032	0.0373224	0.0254374	0.0218379	CDS	0
LSM1	ENST00000311351	ENST00000311351_9_uoORF_3	8-:38176316-38176364	uoORF	CTG	6.52e-06	1.8444e-05	0.352521	0.13594	0.210996	0.230556	0.0203139	0.23128	0.147664	0.313466	0.232503	0.178181	CDS	0
LSM14A	ENST00000544216	ENST00000544216_8_uORF_3	19_34172524-34172551	uORF	ATG	0.019662	0.0417216	0.0952127	0.0618421	0.0690212	0.0740016	0.0213864	0.121069	0.0655621	0.061928	0.0750194	0.0674864	CDS	0
LSM14A	ENST00000544216	ENST00000544216_8_uoORF_4	19_34172589-34172646	uoORF	GTG	0.00048511	0.00121286	0.0950351	0.0353947	0.0392428	0.0475724	0.0235988	0.0543576	0.0310022	0.0399634	0.0543113	0.0372305	CDS	0
LSR	ENST00000621372	ENST00000621372_4_uORF_2	19_35248835-35248868	uORF	ATG	8.67e-09	2.75489e-08	0.0217665	0.0183977	0.0141832	0.0361842	0.00715158	0.0185264	0.0258348	0.0162465	0.0226329	0.0169398	CDS	0
LUC7L3	ENST00000505658	ENST00000505658_6_uoORF_1	17_50719658-50719736	uoORF	TTG	1.51e-09	4.9001e-09	0.0882556	0.0333969	0.0371984	0.036961	0.0238982	0.110961	0.0452965	0.0502728	0.048953	0.0576071	CDS	0
LYAR	ENST00000343470	ENST00000343470_9_uORF_3	4-:4290038-4290101	uORF	CTG	0.01346	0.0291873	0.0414089	0.0106432	0.0322245	0.0683928	0.0104322	0.0773245	0.0253572	0.048433	0.0381674	0.0403867	CDS	0
LYN	ENST00000519728	ENST00000519728_6_uoORF_1	8_55880065-55880103|55941854-55941900	uoORF	GTG	0.0084263	0.0186687	0.0681636	0.168847	0.118321	0.0642606	0.0480094	0.00179211	0.0328972	0.0899471	0.104898	0.0431614	trunc	0
LYSMD3	ENST00000315948	ENST00000315948_11_uORF_1	5-:90529456-90529525	uORF	ATG	3.69e-09	1.18471e-08	0.522727	0.273902	0.428571	0.268775	0.535948	1.06667	0.320354	0.693548	0.373494	0.654129	CDS	0
LZIC	ENST00000377223	ENST00000377223_6_uORF_1	1-:9942630-9942735	uORF	ATG	2.07e-09	6.69362e-09	0.430962	0.295736	0.214623	0.473684	0.470032	0.729927	0.406953	0.420063	0.353751	0.506744	CDS	0
MACROH2A2	ENST00000679349	ENST00000679349_1_uORF_6	10_70052866-70052884	uORF	ATT	0.0022009	0.00517151	0.0527655	0.00550413	0.0269337	0.0209177	0.0377207	0.0378457	0.028115	0.0615551	0.0265303	0.0413091	CDS	0
MAGED2	ENST00000396224	ENST00000396224_1_uoORF_3	X_54809160-54809223|54809302-54809365	uoORF	CTG	0.0018252	0.00433393	0.0118873	0.0120535	0.0118505	0.0120195	0.00322252	0.0265454	0.0185975	0.0163934	0.0119527	0.0161897	trunc	0
MAGEH1	ENST00000342972	ENST00000342972_3_uORF_1	X_55452169-55452340	uORF	CTG	1.33e-12	4.56483e-12	0.286164	0.191321	0.315476	0.349882	0.138889	0.308917	0.126168	0.239474	0.285711	0.203362	CDS	0
MAML1	ENST00000292599	ENST00000292599_4_uORF_1	5_179732845-179732911	uORF	ATG	0.00023649	0.000608031	0.129582	0.292804	0.139619	0.171336	0.19268	0.148819	0.197077	0.191011	0.183335	0.182397	trunc	0
MANBAL	ENST00000373605	ENST00000373605_7_uoORF_1	20_37301237-37301279	uoORF	ACG	2.51e-05	6.85923e-05	0.0965402	0.0774698	0.0835351	0.0456389	0.0107212	0.117808	0.0938416	0.125648	0.075796	0.0870047	CDS	0
MAP2K1	ENST00000307102	ENST00000307102_10_uORF_2	15_66386980-66387043	uORF	CTG	0.0028866	0.00671164	0.046342	0.0226423	0.0504866	0.019343	0.0207684	0.0411568	0.0424829	0.0570384	0.0347035	0.0403616	CDS	0
MAP2K1	ENST00000307102	ENST00000307102_10_uoORF_1	15_66387193-66387409	uoORF	CTG	0.0024339	0.00569479	0.0980946	0.0471541	0.0836375	0.0779859	0.046729	0.0815721	0.0653771	0.0749543	0.076718	0.0671581	CDS	0
MAP2K3	ENST00000342679	ENST00000342679_9_uORF_2	17_21284844-21284889	uORF	ATG	0.001594	0.00381027	0.114437	0.0443723	0.103986	0.124277	0.106439	0.237237	0.0640051	0.289048	0.0967681	0.174182	CDS	0
MAP2K6	ENST00000590474	ENST00000590474_7_uORF_2	17_69414876-69414921	uORF	ATG	0.00144	0.00345371	0.15449	0.0775109	0.132446	0.078478	0.0536364	0.0810081	0.101366	0.103763	0.110731	0.0849434	CDS	0
MAP4	ENST00000360240	ENST00000360240_10_uoORF_1	3-:47998829-47998879|48088772-48088833	uoORF	ACG	4.25e-05	0.000114719	0.0557869	0.0248462	0.0282134	0.0130579	0.0202931	0.0328454	0.0175101	0.0280757	0.0304761	0.0246811	trunc	0
MAPK1IP1L	ENST00000395468	ENST00000395468_9_uORF_2	14_55051679-55051709	uORF	CTG	0.0012477	0.0030095	0.0186365	0.00800754	0.0173533	0.0019971	0.00409417	0.00372255	0.00483544	0.014316	0.0114986	0.00674204	trunc	0
MAPK6	ENST00000681888	ENST00000681888_1_uORF_1	15_52019250-52019390|52045829-52045899	uORF	ATG	0	0	0.414458	0.225073	0.323685	0.484494	0.922385	1.44986	2.40226	2.74879	0.361928	1.88082	CDS	1
MAPK6	ENST00000681888	ENST00000681888_1_uORF_3	15_52046012-52046060	uORF	ATG	1.24e-05	3.45339e-05	0.0915663	0.0961802	0.148797	0.0835955	0.134983	0.0112465	0.190226	0.137681	0.105035	0.118534	CDS	1
MAPKAP1	ENST00000265960	ENST00000265960_8_uORF_1	9-:125707113-125707143	uORF	ATG	0.0013428	0.00322958	1.12301	1.15144	0.643575	0.466355	0.233474	2.08492	1.04696	1.4741	0.846096	1.20986	trunc	1
MAPKAP1	ENST00000265960	ENST00000265960_8_uORF_2	9-:125672603-125672621	uORF	ATG	4.02e-06	1.14941e-05	0.218737	0.334156	0.10838	0.271028	0.255977	0.162518	0.172496	0.0627943	0.233075	0.163447	trunc	1
MARCKS	ENST00000612661	ENST00000612661_2_uORF_2	6_113857427-113857535	uORF	CTG	0.0020486	0.00483499	0.0454339	0.0446686	0.0102956	0.0201571	0.0202603	0.0656432	0.0226223	0.021399	0.0301388	0.0324812	CDS	0
MAT2B	ENST00000280969	ENST00000280969_9_uoORF_4	5_163503380-163503424|163512001-163512196|163513554-163513567	uoORF	ATA	0.00029581	0.000753535	0.0949377	0.0640881	0.0657648	0.0756602	0.0425609	0.0801257	0.0800712	0.0811099	0.0751127	0.0709669	CDS	0
MCM8	ENST00000378886	ENST00000378886_6_uORF_3	20_5950801-5950846	uORF	ATG	0.00043935	0.00110392	0.547393	0.406404	0.37247	0.4	0.238095	0.425	0.614907	0.437956	0.431567	0.42899	trunc	0
MDM2	ENST00000258149	ENST00000258149_11_uORF_4	12_68808246-68808291	uORF	ATG	6.69e-06	1.89085e-05	0.110015	0.115669	0.12633	0.11938	0.0400478	0.189786	0.0662193	0.0881435	0.117848	0.0960492	CDS	0
MDM4	ENST00000367182	ENST00000367182_8_uORF_1	1_204516423-204516441	uORF	ATG	0.00097656	0.00237901	0.934228	0.493298	0.492788	0.416834	0.355049	0.334559	0.550379	0.340741	0.584287	0.395182	CDS	0
MDN1	ENST00000629399	ENST00000629399_2_uORF_2	6-:89819645-89819660	uORF	CTG	0.0016	0.0038159	0.0126373	0.00675545	0.00266402	0.00856664	0.00877297	0.0123424	0.00577139	0.00299222	0.00765584	0.00746975	CDS	0
MED1	ENST00000300651	ENST00000300651_11_uORF_1	17-:39451191-39451245	uORF	ATG	1.54e-05	4.2686e-05	0.101214	0.0606897	0.0727634	0.0882223	0.0214612	0.079128	0.0620155	0.0618059	0.0807223	0.0561026	CDS	0
MED16	ENST00000312090	ENST00000312090_10_uORF_1	19-:893135-893162	uORF	ATG	2.44e-05	6.6723e-05	0.116643	0.116922	0.0694748	0.153966	0.0848071	0.109699	0.0858355	0.0640871	0.114251	0.0861071	CDS	0
METTL13	ENST00000361735	ENST00000361735_4_uORF_2	1_171781778-171781799	uORF	ATG	0.00024414	0.00062649	0.0522423	0.0430389	0.0211558	0.0383645	0.0136082	0.0448856	0.044051	0.0215223	0.0387004	0.0310168	CDS	0
METTL13	ENST00000361735	ENST00000361735_4_uORF_1	1_171781836-171781932	uORF	ATG	6.67e-09	2.1277e-08	0.154184	0.148578	0.106295	0.115093	0.0626804	0.116098	0.120538	0.0929134	0.131038	0.0980576	CDS	0
METTL16	ENST00000263092	ENST00000263092_11_uORF_2	17-:2511820-2511835	uORF	ATG	0.0066639	0.0149438	0.0952381	0.108199	0.0625652	0.0936864	0.0751582	0.107143	0.126626	0.0577717	0.0899221	0.0916747	trunc	0
METTL22	ENST00000381920	ENST00000381920_8_uORF_1	16_8625509-8625608	uORF	CTG	4.9e-09	1.56872e-08	0.562036	0.502836	0.321033	0.379845	0.455399	1.00518	0.638298	1.49219	0.441437	0.897766	trunc	0
METTL23	ENST00000615984	ENST00000615984_4_uoORF_1	17_76729705-76729792	uoORF	ATG	2.15e-05	5.89911e-05	0.513562	0.332599	0.536145	0.919075	0.141762	1.49057	0.341398	0.883721	0.575345	0.714362	trunc	0
METTL3	ENST00000298717	ENST00000298717_9_uORF_5	14-:21511224-21511293	uORF	CTG	0.0030563	0.00709326	0.0246319	0.0178914	0.00890795	0.0320661	0.0150293	0.0584687	0.0409996	0.00421779	0.0208743	0.0296789	CDS	0
METTL7A	ENST00000548553	ENST00000548553_1_uORF_1	12_50924814-50924880	uORF	CTG	2.74e-10	9.04286e-10	0.102539	0.109995	0.0545567	0.0845617	0.059593	0.142273	0.13504	0.0464396	0.0879131	0.0958365	CDS	0
METTL9	ENST00000358154	ENST00000358154_8_uORF_1	16_21599612-21599708	uORF	ATG	2.82e-11	9.48866e-11	0.75171	0.689012	0.658824	0.593245	0.129282	1.71657	0.402453	0.916883	0.673198	0.791296	trunc	0
MEX3C	ENST00000406189	ENST00000406189_4_uORF_1	18-:51197409-51197424	uORF	GTG	0.0081	0.017977	0.073004	0.0454545	0.0400271	0.0389696	0.0549242	0.110373	0.0818697	0.0704762	0.0493638	0.0794109	trunc	0
MFHAS1	ENST00000276282	ENST00000276282_7_uORF_1	8-:8893408-8893561	uORF	ACG	1.02e-11	3.4599e-11	2.08553	0.261261	0.242188	0.780488	5.36364	12.4516	2.7	1.95082	0.842366	5.61652	trunc	1
MFSD3	ENST00000301327	ENST00000301327_5_uORF_2	8_144509203-144509254	uORF	CTG	0.00076477	0.00188122	0.227348	0.308478	0.208696	0.203986	0.282686	0.147745	0.211409	0.10104	0.237127	0.18572	CDS	0
MGAT2	ENST00000305386	ENST00000305386_4_uORF_2	14_49620983-49621022	uORF	ATG	0.00043887	0.0011028	0.404481	0.293165	0.328912	0.318996	0.173077	0.435897	0.352834	0.278689	0.336389	0.310124	trunc	0
MGAT2	ENST00000305386	ENST00000305386_4_uORF_1	14_49620883-49620925	uORF	ATG	0.0007453	0.00183533	0.5	0.30036	0.188329	0.379928	0.112637	0.761905	0.409506	0.377049	0.342154	0.415274	trunc	0
MGME1	ENST00000377710	ENST00000377710_10_uORF_2	20_17969810-17969837	uORF	ATA	3.54e-05	9.60052e-05	0.0691511	0.0568581	0.0392839	0.0588235	0.0219675	0.0753796	0.0298898	0.0179211	0.0560292	0.0362895	trunc	0
MGME1	ENST00000377710	ENST00000377710_10_uORF_1	20_17969020-17969119	uORF	CTG	5.22e-07	1.55919e-06	0.0650104	0.0533411	0.0606663	0.0535558	0.025788	0.0661605	0.0788343	0.101792	0.0581434	0.0681437	trunc	0
MID1IP1	ENST00000336949	ENST00000336949_7_uORF_2	X_38804272-38804374	uORF	ATG	5.88e-11	1.96382e-10	0.141847	0.126506	0.129559	0.0753181	0.176205	0.350717	0.191029	0.205177	0.118308	0.230782	CDS	0
MID1IP1	ENST00000336949	ENST00000336949_7_uORF_5	X_38803063-38803213	uORF	ATG	3.21e-08	1.00279e-07	0.00725303	0.0223054	0.0165798	0.00814249	0.0448042	0.00782269	0.0472296	0.0274848	0.0135702	0.0318353	CDS	0
MID1IP1	ENST00000336949	ENST00000336949_7_uORF_3	X_38802577-38802679	uORF	ATT	4.93e-09	1.57815e-08	0.0408557	0.0446109	0.0172904	0.0274809	0.0523343	0.0599739	0.0598945	0.0425056	0.0325595	0.0536771	CDS	0
MID1IP1	ENST00000336949	ENST00000336949_7_uORF_1	X_38804855-38804870	uORF	TTG	0.016269	0.0348043	0.0243298	0.0170954	0.0480815	0.0277354	0.032003	0.0101043	0.0437995	0.0677533	0.0293105	0.038415	CDS	0
MIDN	ENST00000682408	ENST00000682408_1_uORF_1	19_1249959-1250010	uORF	ACG	0.0056005	0.012656	0.0602785	0.0617889	0.0828821	0.0685057	0.00217994	0.0825644	0.0577732	0.0850456	0.0683638	0.0568908	trunc	0
MIF	ENST00000215754	ENST00000215754_8_uORF_3	22_23894383-23894410	uORF	GTG	1.51e-06	4.41263e-06	0.0215915	0.00705626	0.00996007	0.00782009	0.0236566	0.0130927	0.0163859	0.0118735	0.011607	0.0162522	trunc	0
MIIP	ENST00000235332	ENST00000235332_6_uORF_2	1_12021683-12021704	uORF	CTG	6.4e-05	0.000171066	0.181134	0.112142	0.078125	0.19477	0.0297806	0.105799	0.112181	0.0981257	0.141543	0.0864715	CDS	0
MLEC	ENST00000228506	ENST00000228506_8_uORF_1	12_120687179-120687227	uORF	ATG	1.25e-05	3.48091e-05	0.512298	0.329068	0.391122	0.302105	0.165378	0.517444	0.311138	0.375319	0.383648	0.34232	trunc	0
MLF2	ENST00000203630	ENST00000203630_10_uoORF_3	12-:6752318-6752362|6752938-6753089	uoORF	ACG	1.83e-07	5.56082e-07	0.183545	0.0933794	0.0630585	0.106851	0.0799565	0.379787	0.148654	0.0993139	0.111709	0.176928	trunc	0
MLLT10	ENST00000307729	ENST00000307729_12_uORF_2	10_21534469-21534502	uORF	ATG	0.0019383	0.00459503	0.399132	0.758294	0.30787	0.308036	0.233202	0.285294	0.277035	0.547445	0.443333	0.335744	trunc	0
MLLT11	ENST00000368921	ENST00000368921_5_uORF_1	1_151060529-151060547	uORF	ACG	0.012559	0.0273083	0.0882935	0.0890107	0.0976919	0.0910862	0.065	0.0987282	0.125921	0.0925926	0.0915206	0.0955604	trunc	0
MLST8	ENST00000397124	ENST00000397124_5_uORF_3	16_2205762-2205875|2206030-2206046	uORF	GTG	1.77e-07	5.38241e-07	0.176843	0.107087	0.159498	0.113782	0.124764	0.211896	0.178056	0.132097	0.139302	0.161703	trunc	0
MMP16	ENST00000286614	ENST00000286614_11_uORF_1	8-:88327403-88327427	uORF	ATG	6.1e-05	0.0001633	0.18853	0.2002	0.226087	0.141593	0.108365	0.0396825	0.190098	0.104738	0.189103	0.110721	trunc	0
MNAT1	ENST00000261245	ENST00000261245_9_uORF_4	14_60734816-60734849	uORF	CTG	0.00020414	0.00052773	0.0550203	0.0513171	0.0503546	0.0521961	0.0343623	0.105115	0.0720539	0.0701754	0.052222	0.0704267	CDS	0
MOB3B	ENST00000262244	ENST00000262244_6_uORF_1	9-:27529563-27529674	uORF	TTG	0.00076442	0.00188052	0.360568	0.219342	0.278761	0.446927	0.326805	0.939655	0.306881	0.413395	0.3264	0.496684	CDS	0
MOB3B	ENST00000262244	ENST00000262244_6_uORF_2	9-:27455689-27455737	uORF	AGG	9.23e-07	2.72746e-06	0.120782	0.137587	0.289823	0.210428	0.0905753	0.087931	0.285352	0.196305	0.189655	0.165041	CDS	0
MORC2	ENST00000397641	ENST00000397641_8_uORF_12	22-:30968308-30968380	uORF	CTG	0.0080079	0.0178327	0.0241325	0.027466	0.0339916	0.0448776	0.0355839	0.0233546	0.0441632	0.0326248	0.0326169	0.0339316	CDS	0
MORC2	ENST00000397641	ENST00000397641_8_uORF_9	22-:30968324-30968357	uORF	ATG	0.0023312	0.00546235	0.107803	0.110819	0.0414374	0.0843155	0.0501825	0.0254777	0.0704641	0.0484429	0.0860939	0.0486418	CDS	0
MORC2	ENST00000397641	ENST00000397641_8_uORF_15	22-:30968241-30968256	uORF	ATG	0.0081	0.017977	0.0221948	0.0491999	0.0158627	0.0276519	0.0314781	0.0089172	0.0129395	0.0103806	0.0287273	0.0159289	CDS	0
MORC2	ENST00000397641	ENST00000397641_8_uORF_14	22-:30968532-30968559	uORF	ATG	0.00052312	0.00130566	0.02836	0.0377358	0.0187763	0.0312783	0.0264599	0.00509554	0.026301	0.0153238	0.0290376	0.018295	CDS	0
MORF4L2	ENST00000441076	ENST00000441076_7_uORF_2	X-:103678600-103678651|103685170-103685206	uORF	CTG	0.00060761	0.00150742	0.0551147	0.0261822	0.0227063	0.0299354	0.0295334	0.0364193	0.0306207	0.0321655	0.0334846	0.0321847	trunc	0
MRPL11	ENST00000310999	ENST00000310999_11_uORF_2	11-:66438782-66438818	uORF	GTG	1.3e-06	3.81074e-06	0.184531	0.164467	0.202658	0.273343	0.0722628	0.202933	0.130984	0.0703633	0.20625	0.119136	CDS	0
MRPL18	ENST00000367034	ENST00000367034_5_uORF_3	6_159790513-159790549	uORF	ATG	0.00012612	0.000331093	0.212202	0.2141	0.365356	0.217747	0.236939	0.27988	0.199207	0.201531	0.252351	0.229389	trunc	0
MRPL42	ENST00000552217	ENST00000552217_6_uORF_2	12_93467524-93467542	uORF	ATG	0.012559	0.0273083	0.136149	0.137323	0.153105	0.111632	0.151637	0.256093	0.149223	0.190693	0.134552	0.186911	CDS	0
MRPL51	ENST00000229238	ENST00000229238_5_uORF_3	12-:6493208-6493238	uORF	ATG	1e-09	3.25882e-09	0.346625	0.265519	0.34474	0.318918	0.156753	0.449896	0.205829	0.295467	0.31895	0.276986	CDS	0
MRPL55	ENST00000430433	ENST00000430433_5_uoORF_3	1-:228108061-228108084|228108234-228108313	uoORF	ACG	0.00012866	0.000337097	0.329958	0.221083	0.201068	0.17368	0.182186	0.208005	0.193652	0.196544	0.231447	0.195097	CDS	0
MRPS12	ENST00000407800	ENST00000407800_2_uORF_2	19_38931010-38931115	uORF	CTG	0.01832	0.0390067	0.0281849	0.0253623	0.0339117	0.0144404	0.0409066	0.0846346	0.059985	0.0824121	0.0254748	0.0669846	CDS	0
MRPS12	ENST00000407800	ENST00000407800_2_uORF_1	19_38931143-38931161	uORF	ATG	0.0001286	0.00033697	0.250282	0.242754	0.102524	0.109025	0.325041	0.0718301	0.376656	0.164824	0.176146	0.234588	CDS	0
MRPS15	ENST00000373116	ENST00000373116_6_uORF_1	1-:36464339-36464357	uORF	ATG	0.012559	0.0273083	0.0543781	0.0522766	0.0703496	0.0905263	0.0636581	0.0662371	0.0846579	0.0923018	0.0668826	0.0767137	trunc	0
MRPS21	ENST00000581066	ENST00000581066_2_uORF_1	1_150293932-150294163	uORF	CTG	9.27e-09	2.94362e-08	0.0523295	0.043328	0.0307771	0.0353879	0.0334143	0.0406742	0.0256511	0.0385536	0.0404556	0.0345733	CDS	0
MRPS25	ENST00000253686	ENST00000253686_7_uoORF_3	3-:15065184-15065301	uoORF	CTG	6.9e-05	0.000184145	0.0964706	0.0148768	0.0557377	0.0562081	0.0565217	0.072547	0.0372426	0.0457556	0.0558233	0.0530167	CDS	0
MRPS33	ENST00000393008	ENST00000393008_7_uoORF_2	7-:141010539-141010647	uoORF	TTG	0.00016664	0.00043335	0.123699	0.0853462	0.0509615	0.0777559	0.0400381	0.111855	0.143563	0.0556818	0.0844408	0.0877844	CDS	0
MSI1	ENST00000257552	ENST00000257552_7_uoORF_1	12-:120368234-120368273|120368832-120368873|120369032-120369162	uoORF	CTG	0.0013585	0.00326627	0.0869565	0.0622767	0.0724401	0.0309218	0.0662824	0.181269	0.0585635	0.112426	0.0631488	0.104635	trunc	0
MSL2	ENST00000309993	ENST00000309993_3_uORF_1	3-:136196199-136196331	uORF	ATG	1.77e-10	5.86071e-10	0.125087	0.118736	0.150146	0.214559	0.147679	0.382353	0.113271	0.143541	0.152132	0.196711	CDS	0
MSMO1	ENST00000261507	ENST00000261507_11_uORF_2	4_165333346-165333367	uORF	AGG	9.68e-05	0.000255726	0.0228941	0.0129789	0.0148588	0.0116934	0.0150008	0.0459379	0.0517636	0.025288	0.0156063	0.0344976	CDS	0
MTA2	ENST00000278823	ENST00000278823_7_uORF_3	11-:62601596-62601614	uORF	ATG	0.00097656	0.00237901	0.0981923	0.0615403	0.050043	0.0566421	0.0749293	0.0987465	0.116279	0.080225	0.0666044	0.092545	CDS	0
MTF2	ENST00000370298	ENST00000370298_9_uORF_6	1_93079495-93079522	uORF	ATG	0.00052312	0.00130566	0.0624774	0.0720896	0.0582396	0.103704	0.0721358	0.0777882	0.0940582	0.0730397	0.0741276	0.0792555	trunc	0
MTF2	ENST00000370298	ENST00000370298_9_uORF_7	1_93079355-93079439	uORF	ATT	0.0001904	0.000493342	0.0801733	0.0496834	0.0324289	0.104527	0.158416	0.0656045	0.0476305	0.148228	0.0667031	0.10497	trunc	0
MTFR1L	ENST00000374303	ENST00000374303_7_uoORF_3	1_25823028-25823128|25823643-25823747	uoORF	ATG	0.0053547	0.0121267	0.537037	0.325527	0.32	0.383838	0.181406	0.494481	0.318391	0.403509	0.391601	0.349447	trunc	0
MTMR14	ENST00000296003	ENST00000296003_9_uORF_2	3_9649540-9649564	uORF	ATG	6.88e-06	1.9423e-05	0.286437	0.184113	0.195876	0.229273	0.0799574	0.440409	0.162109	0.210306	0.223925	0.223195	trunc	0
MTMR6	ENST00000381801	ENST00000381801_6_uORF_1	13-:25287276-25287291	uORF	ATG	0.0081	0.017977	0.0880212	0.0986733	0.0998487	0.13217	0.0652742	0.0218409	0.0289796	0.178138	0.104678	0.0735581	CDS	0
MTX2	ENST00000249442	ENST00000249442_11_uORF_4	2_176269455-176269521	uORF	CTG	0.015882	0.034031	0.0534367	0.0338048	0.0715116	0.0318157	0.0736648	0.164835	0.0451247	0.0783091	0.0476422	0.0904834	CDS	0
MTX2	ENST00000249442	ENST00000249442_11_uORF_3	2_176269524-176269584	uORF	TTG	0.010928	0.0239575	0.141241	0.0548465	0.0662791	0.082282	0.0466544	0.151648	0.0671202	0.0519751	0.086162	0.0793495	CDS	0
MYBL2	ENST00000217026	ENST00000217026_5_uORF_2	20_43667115-43667214	uORF	CTG	1.03e-08	3.2668e-08	0.510371	0.273292	0.561321	0.490688	0.278842	0.574931	0.235527	0.473891	0.458918	0.390798	trunc	0
MYL6B	ENST00000553066	ENST00000553066_5_uoORF_7	12_56153895-56153946	uoORF	CTG	3.01e-12	1.02839e-11	0.631045	0.369296	0.514546	0.364472	0.227053	0.440186	0.446818	0.519525	0.46984	0.408395	trunc	0
MYO1E	ENST00000288235	ENST00000288235_9_uORF_2	15-:59372630-59372666	uORF	ATG	6.08e-05	0.000162959	0.0766859	0.0713531	0.0782661	0.0415677	0.0532151	0.0439189	0.0405797	0.0424178	0.0669682	0.0450329	trunc	0
MYO1E	ENST00000288235	ENST00000288235_9_uORF_1	15-:59372711-59372729	uORF	ATG	0.0041152	0.00941724	0.204239	0.0243129	0.0102348	0.04038	0.0388027	0.157658	0.0125604	0.0805938	0.0697917	0.0724036	trunc	0
N4BP3	ENST00000274605	ENST00000274605_6_uORF_1	5_178113660-178113771|178119553-178119577	uORF	ACG	0.00051383	0.00128324	0.284922	0.0962513	0.274143	0.276923	0.109982	0.465532	0.283358	0.317139	0.23306	0.294003	trunc	0
NA	ENST00000627388	ENST00000627388_2_uORF_4	15-:70097054-70097132	uORF	ATG	5.7e-05	0.0001529	0.293564	0.161673	0.0950271	0.160693	0.150769	0.106992	0.101743	0.12851	0.177739	0.122003	trunc	0
NA	ENST00000394934	ENST00000394934_4_uoORF_1	10-:71834499-71834505|71851181-71851307	uoORF	CTG	2.56e-05	6.99326e-05	0.00847408	0.00571289	0.00604671	0.0116716	0.00520658	0.0101434	0.00302312	0.00743366	0.00797633	0.00645168	trunc	0
NA	ENST00000593731	ENST00000593731_1_uORF_3	19_18153235-18153294|18155456-18155565	uORF	ACG	0.00010696	0.000281703	0.573214	0.482824	0.283688	0.415493	0.516667	1.856	0.686047	1.05	0.438805	1.02718	trunc	0
NA	ENST00000299954	ENST00000299954_13_uORF_1	17_67377579-67377669	uORF	ATC	0.00021362	0.000550875	0.426523	0.193922	0.209979	0.163873	0.486891	0.524079	0.437651	0.459239	0.248574	0.476965	trunc	0
NA	ENST00000299954	ENST00000299954_13_uORF_2	17_67377980-67378016	uORF	ATG	2.06e-05	5.66012e-05	0.341398	0.196816	0.18711	0.223464	0.464419	0.0793201	0.293644	0.201087	0.237197	0.259618	trunc	0
NA	ENST00000640019	ENST00000640019_3_uORF_1	10_14838402-14838459|14839904-14839985|14840074-14840157|14842133-14842179	uORF	ATG	0.0031212	0.00722899	2.42388	1.70229	1.17582	2.33951	1.48555	4.82609	1.3469	2.95833	1.91037	2.65422	CDS	0
NA	ENST00000627388	ENST00000627388_2_uORF_3	15-:70097510-70097573	uORF	TTG	9.09e-05	0.000240726	0.197488	0.222846	0.145741	0.262246	0.160769	0.113347	0.184619	0.106911	0.20708	0.141412	trunc	0
NA	ENST00000593731	ENST00000593731_1_uORF_4	19_18155599-18155623	uORF	ATG	6.1e-05	0.0001633	0.310714	0.288168	0.191489	0.411972	0.0833333	0.216	0.0930233	0.6625	0.300586	0.263714	trunc	0
NA	ENST00000627388	ENST00000627388_2_uORF_11	15-:70097524-70097602	uORF	GTG	0.0053153	0.0120394	0.089168	0.0761548	0.0359429	0.0890084	0.0330769	0.0577331	0.0630523	0.0205184	0.0725685	0.0435952	trunc	0
NA	ENST00000370651	ENST00000370651_7_uoORF_2	6_63572553-63572688	uoORF	ATG	4.54e-08	1.41135e-07	0.435884	0.23427	0.400574	0.169014	0.181682	0.350024	0.241004	0.497207	0.309935	0.317479	CDS	0
NA	ENST00000593731	ENST00000593731_1_uORF_6	19_18155663-18155714	uORF	ATG	0.00057032	0.00141851	0.340179	0.278626	0.229314	0.394366	0.933333	0.088	0.379845	0.5125	0.310621	0.47842	trunc	0
NA	ENST00000627388	ENST00000627388_2_uORF_12	15-:70097704-70097860	uORF	CTG	0.003033	0.00704197	0.0844584	0.0274657	0.0246184	0.00716846	0.0976923	0.0942797	0.0561261	0.0296976	0.0359277	0.0694489	trunc	0
NA	ENST00000593731	ENST00000593731_1_uORF_2	19_18155480-18155573	uORF	ATG	0.00024779	0.000635522	1.38661	1.12977	1.21986	1.41901	1.33333	2.656	1.22093	3.1625	1.28881	2.09319	trunc	0
NAA15	ENST00000296543	ENST00000296543_10_uORF_6	4_139301654-139301690	uORF	CTG	0.003628	0.00835981	0.0505229	0.0155091	0.0199435	0.0230451	0.00876437	0.0311548	0.0283644	0.0372113	0.0272551	0.0263737	CDS	0
NAA15	ENST00000296543	ENST00000296543_10_uORF_5	4_139301604-139301631	uORF	ACG	0.0015265	0.00365429	0.0258914	0.0191054	0.0142902	0.0150181	0.0268678	0.0203183	0.0264493	0.0156116	0.0185763	0.0223118	CDS	0
NAA50	ENST00000240922	ENST00000240922_8_uoORF_4	3-:113724092-113724095|113745941-113745995	uoORF	ACG	1.85e-05	5.1013e-05	0.259462	0.205716	0.246841	0.216931	0.0769723	0.208573	0.177759	0.187682	0.232238	0.162746	trunc	0
NAA50	ENST00000240922	ENST00000240922_8_uoORF_2	3-:113745945-113746023	uoORF	GTG	0.0073166	0.0163623	0.182133	0.128202	0.177504	0.183598	0.043847	0.315374	0.126962	0.191911	0.167859	0.169523	trunc	0
NAGA	ENST00000396398	ENST00000396398_8_uORF_2	22-:42070435-42070549	uORF	CTG	0.00021965	0.000566176	0.0862745	0.0712678	0.039485	0.0319516	0.0622141	0.0379902	0.0946677	0.0719258	0.0572447	0.0666994	trunc	0
NANOG	ENST00000229307	ENST00000229307_9_uORF_1	12_7789456-7789561	uORF	ATG	0.00047691	0.00119307	0.0735084	0.0602821	0.0545378	0.0712265	0.0982791	0.132921	0.0536803	0.0369898	0.0648887	0.0804675	trunc	0
NANOG	ENST00000229307	ENST00000229307_9_uoORF_5	12_7789585-7789618	uoORF	ATT	0.00025186	0.000645786	0.0149068	0.00629409	0.00476076	0.0111945	0.0046574	0.010588	0.00544278	0.0053412	0.00928903	0.00650736	trunc	0
NANOG	ENST00000229307	ENST00000229307_9_uORF_2	12_7789464-7789497	uORF	ATG	0.012061	0.0263212	0.0616782	0.0431362	0.0422442	0.0598475	0.047916	0.0692295	0.0495223	0.0375478	0.0517265	0.0510539	trunc	0
NANOGP8	ENST00000528386	ENST00000528386_4_uORF_1	15-:35085163-35085268	uORF	ATG	0.00047691	0.00119307	0.0666091	0.0561139	0.0489533	0.0666552	0.087301	0.117902	0.0500033	0.0320663	0.0595829	0.0718182	trunc	0
NANOGP8	ENST00000528386	ENST00000528386_4_uoORF_3	15-:35085106-35085139	uoORF	ATT	0.00025184	0.000645786	0.0135077	0.00585888	0.00427327	0.010476	0.00413716	0.00939171	0.00506996	0.00463027	0.00852897	0.00580727	trunc	0
NANOGP8	ENST00000528386	ENST00000528386_4_uORF_2	15-:35085227-35085260	uORF	ATG	0.012061	0.0263212	0.0558893	0.0401535	0.0379185	0.0560064	0.0425636	0.0614073	0.0461301	0.0325501	0.047492	0.0456628	trunc	0
NAP1L3	ENST00000373079	ENST00000373079_4_uoORF_1	X-:93673284-93673422	uoORF	ATC	0.00080647	0.00197881	0.0576415	0.0392363	0.0366591	0.0168337	0.0188411	0.0381356	0.0431409	0.102616	0.0375926	0.0506833	CDS	0
NARS2	ENST00000281038	ENST00000281038_10_uORF_1	11-:78574565-78574691	uORF	TTG	1.35e-06	3.95454e-06	0.175852	0.0973716	0.0255507	0.0703125	0.137895	0.207469	0.186516	0.182596	0.0922717	0.178619	trunc	0
NCAPD2	ENST00000315579	ENST00000315579_10_uORF_2	12_6494116-6494154|6495075-6495091	uORF	CTG	0.009197	0.020307	0.0123996	0.0100629	0.010101	0.00868339	0.00593765	0.0139347	0.00910191	0.0103108	0.0103117	0.00982127	CDS	0
NCAPG	ENST00000251496	ENST00000251496_7_uoORF_2	4_17811022-17811109	uoORF	CTG	0.010255	0.0225462	0.0384673	0.0103567	0.0172461	0.0132658	0.00506757	0.0655048	0.0126421	0.023908	0.019834	0.0267806	trunc	0
NCOR1	ENST00000268712	ENST00000268712_8_uORF_2	17-:16215472-16215526	uORF	ATG	4.25e-05	0.000114719	0.0531489	0.0566564	0.0480365	0.0456113	0.0388563	0.0877088	0.0415712	0.0397314	0.0508633	0.0519669	CDS	0
NDC80	ENST00000261597	ENST00000261597_9_uoORF_1	18_2571601-2571683|2572976-2573062	uoORF	ATG	0.0024396	0.00570584	0.12	0.074014	0.0976864	0.129918	0.0458295	0.128525	0.0707922	0.11823	0.105405	0.090844	trunc	0
NDUFA8	ENST00000373768	ENST00000373768_4_uoORF_1	9-:122159627-122159729	uoORF	ACG	0.0025116	0.00587143	0.0845307	0.0477497	0.0446955	0.0211346	0.0201126	0.0564566	0.0384035	0.0390852	0.0495276	0.0385145	trunc	0
NDUFV1	ENST00000647561	ENST00000647561_1_uORF_2	11_67606963-67606981	uORF	ATG	0.0001286	0.00033697	0.134859	0.120114	0.12935	0.187483	0.08824	0.135206	0.158095	0.10676	0.142952	0.122075	trunc	0
NECTIN1	ENST00000264025	ENST00000264025_8_uORF_2	11-:119728933-119728972	uORF	ATG	9.35e-07	2.76209e-06	0.144561	0.096313	0.121421	0.144566	0.119254	0.123924	0.12209	0.196053	0.126715	0.14033	trunc	0
NECTIN1	ENST00000264025	ENST00000264025_8_uORF_1	11-:119728751-119728793	uORF	ATG	4.46e-07	1.33709e-06	0.280234	0.201655	0.163309	0.102444	0.212525	0.0464716	0.127553	0.0808402	0.18691	0.116848	trunc	0
NEDD8	ENST00000250495	ENST00000250495_10_uoORF_9	14-:24232260-24232344	uoORF	GTG	4.44e-07	1.33136e-06	0.238105	0.209367	0.167783	0.238111	0.162895	0.417784	0.302299	0.347412	0.213341	0.307597	trunc	0
NEIL2	ENST00000284503	ENST00000284503_7_uoORF_1	8_11770174-11770335|11771445-11771536	uoORF	CTG	1.68e-05	4.64478e-05	0.399164	0.589011	0.364486	0.471338	0.0786164	0.335025	0.493204	0.258824	0.456	0.291417	trunc	0
NETO2	ENST00000562435	ENST00000562435_6_uORF_1	16-:47143754-47143856	uORF	ATG	4.05e-09	1.29886e-08	1.15407	0.607914	0.7	0.812903	0.326848	6.44444	0.716584	2.71667	0.818722	2.55114	trunc	1
NFE2L1	ENST00000362042	ENST00000362042_8_uORF_3	17_48050903-48051083	uORF	ATG	4.26e-06	1.21708e-05	0.0518291	0.0411282	0.0293698	0.0353235	0.03568	0.0442395	0.0563307	0.0354137	0.0394127	0.042916	CDS	0
NFE2L3	ENST00000056233	ENST00000056233_4_uoORF_2	7_26152349-26152502	uoORF	ACG	0.0045425	0.0103587	0.0410862	0.0133668	0.0294929	0.0176946	0.0158965	0.0412502	0.0142799	0.0294384	0.0254101	0.0252163	CDS	0
NFYA	ENST00000341376	ENST00000341376_11_uoORF_1	6_41073039-41073084|41079028-41079118	uoORF	CTG	8.97e-06	2.51368e-05	0.22104	0.149091	0.219828	0.319896	0.0471976	0.164482	0.192071	0.25	0.227464	0.163438	trunc	0
NKAIN1	ENST00000373736	ENST00000373736_7_uORF_2	1-:31239783-31239795	uORF	ACG	0.020285	0.0429347	0.363949	0.0862069	0.324324	0.368421	0.483871	1.70732	0.12766	0.458333	0.285725	0.694295	CDS	0
NLGN4X	ENST00000381093	ENST00000381093_6_uORF_6	X-:6226978-6227068	uORF	ATG	2.18e-09	7.04776e-09	0.0117992	0.00185468	0.0029355	0.00182831	0.024664	0.0223825	0.0148612	0.0130671	0.00460442	0.0187437	CDS	0
NLN	ENST00000380985	ENST00000380985_10_uoORF_3	5_65722257-65722377	uoORF	GTG	0.00037364	0.000944321	0.0812814	0.0467231	0.0633441	0.0604407	0.010295	0.150712	0.0296925	0.0477724	0.0629473	0.059618	trunc	0
NMRK2	ENST00000616156	ENST00000616156_4_uoORF_1	19_3933580-3933697|3936574-3936655	uoORF	ATG	0.0015902	0.0038015	1.37476	1.41898	0.823944	0.781513	0.21372	0.462094	0.477612	0.341935	1.0998	0.37384	CDS	0
NOP10	ENST00000328848	ENST00000328848_6_uoORF_1	15-:34343021-34343099	uoORF	TTG	0.0046199	0.010522	0.126319	0.135347	0.101789	0.151138	0.0592634	0.19181	0.148048	0.115275	0.128648	0.128599	trunc	0
NOP16	ENST00000618911	ENST00000618911_4_uoORF_4	5-:176388472-176388589	uoORF	CTG	0.0028268	0.00657782	0.0565091	0.0372901	0.0446615	0.0479705	0.0842771	0.0422576	0.0742295	0.0338491	0.0466078	0.0586533	CDS	0
NR2F6	ENST00000291442	ENST00000291442_4_uORF_1	19-:17245613-17245682	uORF	ACG	0.00023516	0.000604771	0.142747	0.157754	0.216811	0.138756	0.0686963	0.109663	0.128989	0.27957	0.164017	0.14673	CDS	0
NR2F6	ENST00000291442	ENST00000291442_4_uORF_2	19-:17245469-17245565	uORF	CTG	0.00087346	0.00213799	0.0443673	0.0414439	0.0446965	0.0560492	0.0312256	0.0296629	0.0199468	0.0529954	0.0466392	0.0334577	CDS	0
NR6A1	ENST00000487099	ENST00000487099_7_uORF_1	9-:124771129-124771162	uORF	ATG	2.51e-07	7.58543e-07	0.395814	0.455164	0.29146	0.490196	0.0533049	0.384473	0.508006	0.759214	0.408158	0.426249	trunc	0
NRAS	ENST00000369535	ENST00000369535_5_uoORF_1	1-:114716156-114716177|114716657-114716735	uoORF	ATG	3.84e-12	1.31029e-11	0.476058	0.47316	0.363836	0.313238	0.375638	0.698151	0.480659	0.549201	0.406573	0.525912	trunc	0
NSA2	ENST00000610426	ENST00000610426_5_uoORF_2	5_74767304-74767363|74768930-74769054	uoORF	ATT	3.92e-06	1.12246e-05	0.119021	0.0923944	0.064071	0.127953	0.0373659	0.251362	0.0842803	0.111982	0.10086	0.121247	trunc	0
NTPCR	ENST00000366628	ENST00000366628_10_uoORF_2	1_232950666-232950732	uoORF	CTG	0.019873	0.0421571	0.222402	0.120943	0.161062	0.0941117	0.0586907	0.193444	0.100562	0.155634	0.14963	0.127083	CDS	0
NTS	ENST00000256010	ENST00000256010_7_uORF_1	12_85874359-85874392	uORF	GTG	0.00023854	0.000613033	0.162407	0.0654797	0.0767316	0.0623204	0.0293941	0.0652174	0.0816759	0.105758	0.0917346	0.0705113	CDS	0
NUDT1	ENST00000343985	ENST00000343985_8_uORF_1	7_2242937-2242979	uORF	ATG	0.0027834	0.00648044	0.119852	0.094476	0.0751073	0.130094	0.0500417	0.116897	0.0515537	0.0124294	0.104882	0.0577304	trunc	0
NUDT3	ENST00000607016	ENST00000607016_2_uORF_4	6-:34392524-34392644	uORF	ATG	7.49e-16	3.65782e-15	0.356907	0.328607	0.317512	0.257576	0.237232	1.06047	0.246941	0.447368	0.31515	0.498003	CDS	0
NUF2	ENST00000271452	ENST00000271452_8_uORF_2	1_163321980-163322001	uORF	ATG	1.14e-05	3.18003e-05	0.810458	0.513514	0.225806	0.44335	0.475862	0.342282	0.327526	0.322368	0.498282	0.36701	trunc	0
NUP153	ENST00000262077	ENST00000262077_3_uORF_1	6-:17706453-17706876	uORF	ACG	6.71e-06	1.89596e-05	0.152852	0.0841297	0.0833989	0.0791714	0.108957	0.241196	0.0949105	0.146829	0.0998879	0.147973	trunc	0
NUS1	ENST00000368494	ENST00000368494_4_uORF_1	6_117675505-117675526	uORF	ATG	0.015625	0.0335	0.115385	0.101496	0.0722279	0.0185366	0.103194	0.155496	0.183426	0.21203	0.0769112	0.163537	trunc	0
OARD1	ENST00000468811	ENST00000468811_5_uoORF_2	6-:41071617-41071659	uoORF	ATT	0.00015717	0.000409815	0.0733658	0.082054	0.0676118	0.106752	0.0322581	0.0375587	0.112265	0.0688889	0.0824458	0.0627426	CDS	0
OCIAD1	ENST00000381473	ENST00000381473_7_uORF_3	4_48831101-48831206	uORF	ATG	3.77e-09	1.20986e-08	0.145965	0.0609244	0.134527	0.058248	0.0545765	0.136145	0.0397463	0.0887452	0.0999161	0.0798031	trunc	0
OCIAD2	ENST00000508632	ENST00000508632_6_uORF_4	4-:48904581-48904611|48906657-48906750	uORF	CTG	2.31e-10	7.63836e-10	0.195395	0.0750314	0.0907372	0.141693	0.0423412	0.259956	0.103064	0.156821	0.125714	0.140545	CDS	0
OCIAD2	ENST00000508632	ENST00000508632_6_uoORF_6	4-:48904514-48904577	uoORF	CTG	0.0014804	0.0035476	0.11856	0.0563633	0.0374291	0.0739812	0.00965131	0.0505162	0.151965	0.146617	0.0715834	0.0896874	CDS	0
OCLN	ENST00000680027	ENST00000680027_1_uORF_2	5_69504204-69504228	uORF	TTG	0.0019175	0.00454793	0.0647164	0.0441501	0.0219424	0.0405014	0.000520021	0.0269826	0.0596761	0.0322245	0.0428276	0.0298508	CDS	0
ODC1	ENST00000234111	ENST00000234111_9_uORF_1	2-:10448121-10448187	uORF	CTG	0.0092262	0.0203684	0.208246	0.0819868	0.149584	0.114548	0.0370177	0.219242	0.0525509	0.127226	0.138591	0.109009	CDS	0
P2RY1	ENST00000305097	ENST00000305097_6_uORF_2	3_152835324-152835411	uORF	ATG	1.17e-07	3.58729e-07	0.437223	0.580762	0.476562	0.485246	0.564706	0.220339	0.350365	0.62963	0.494948	0.44126	trunc	0
PAICS	ENST00000264221	ENST00000264221_6_uoORF_4	4_56436265-56436313	uoORF	CTG	7.12e-06	2.0087e-05	0.00813435	0.00341782	0.00406918	0.00306544	0.00264927	0.00597109	0.00545649	0.00638645	0.0046717	0.00511583	trunc	0
PAIP1	ENST00000306846	ENST00000306846_8_uORF_3	5-:43556956-43557043	uORF	CTG	6.37e-06	1.80302e-05	0.0616875	0.0139601	0.0571864	0.0330639	0.021	0.0747764	0.0168279	0.0503319	0.0414745	0.040734	CDS	0
PAIP1	ENST00000306846	ENST00000306846_8_uORF_2	5-:43556945-43556960	uORF	ATG	0.0016	0.0038159	0.0597253	0.0305708	0.109417	0.106539	0.0113333	0.185331	0.059038	0.145465	0.076563	0.100292	CDS	0
PAK1	ENST00000356341	ENST00000356341_8_uORF_6	11-:77473808-77473892	uORF	ACG	0.001934	0.00458558	0.0165529	0.00450142	0.0111926	0.00540812	0.00644154	0.0369369	0.0123299	0.0300361	0.00941375	0.0214361	CDS	0
PAK1	ENST00000356341	ENST00000356341_8_uORF_7	11-:77473643-77473655	uORF	GTG	0.0019531	0.00462039	0.0191048	0.010275	0.00656117	0.00565967	0.00566075	0.00828829	0.0210822	0.0182927	0.0104001	0.013331	CDS	0
PANX1	ENST00000227638	ENST00000227638_8_uORF_1	11_94129186-94129243	uORF	ATG	9.3e-06	2.60516e-05	0.122859	0.221261	0.108051	0.0349762	0.10989	0.284483	0.128495	0.244499	0.121787	0.191842	CDS	0
PARG	ENST00000616448	ENST00000616448_2_uORF_2	10-:49941773-49941863	uORF	ATT	1.11e-07	3.40689e-07	0.497458	0.186275	0.188164	0.190641	0.322	0.727273	0.5086	0.494318	0.265634	0.513048	trunc	0
PARK7	ENST00000338639	ENST00000338639_10_uORF_3	1_7961716-7961793|7962762-7962778	uORF	ATT	2e-05	5.49939e-05	0.0139097	0.010216	0.0123288	0.0118269	0.0190818	0.0212204	0.0181023	0.0152279	0.0120703	0.0184081	CDS	0
PARL	ENST00000317096	ENST00000317096_9_uoORF_4	3-:183884746-183884866	uoORF	GTG	3.83e-10	1.2592e-09	0.191523	0.118053	0.0716685	0.114789	0.114447	0.312532	0.1495	0.126809	0.124008	0.175822	CDS	0
PATZ1	ENST00000266269	ENST00000266269_10_uORF_4	22-:31345620-31345842	uORF	GTG	0.00014624	0.0003822	0.0861545	0.0521121	0.0447947	0.0591691	0.0644302	0.104682	0.0640025	0.0634187	0.0605576	0.0741334	trunc	0
PATZ1	ENST00000266269	ENST00000266269_10_uORF_3	22-:31345778-31345808	uORF	ATG	0.0090802	0.0200628	0.062717	0.0394789	0.0360846	0.0595888	0.0207668	0.0415194	0.0490368	0.051659	0.0494673	0.0407455	trunc	0
PAWR	ENST00000328827	ENST00000328827_9_uORF_2	12-:79690269-79690377	uORF	GTG	4.82e-05	0.000129782	0.0547031	0.0199267	0.0255939	0.0461035	0.0151878	0.0670927	0.0205599	0.0447208	0.0365818	0.0368903	CDS	0
PBX1	ENST00000420696	ENST00000420696_7_uORF_7	1_164559407-164559443	uORF	ATG	0.0088232	0.0195126	0.0112775	0.0166836	0.0212415	0.0109025	0.021031	0.0122971	0.0181318	0.027663	0.0150263	0.0197807	CDS	0
PBX1	ENST00000420696	ENST00000420696_7_uORF_6	1_164559228-164559309	uORF	ACG	2.74e-07	8.27197e-07	0.0406336	0.0187213	0.0317591	0.0207955	0.0241087	0.046729	0.0175622	0.0286169	0.0279774	0.0292542	CDS	0
PCBP1	ENST00000303577	ENST00000303577_7_uORF_1	2_70087694-70087706	uORF	TTG	0.015625	0.0335	0.140737	0.0936626	0.132708	0.0753362	0.098355	0.0693662	0.123605	0.0939803	0.110611	0.0963267	CDS	0
PCDH18	ENST00000344876	ENST00000344876_9_uORF_2	4-:137532340-137532379	uORF	ATG	2.66e-05	7.26101e-05	0.108384	0.0774983	0.123508	0.127687	0.0538173	0.0765661	0.101416	0.0727273	0.10927	0.0761318	CDS	0
PCDH18	ENST00000344876	ENST00000344876_9_uORF_3	4-:137532221-137532302	uORF	ACG	0.0044545	0.0101627	0.0687925	0.0260594	0.0352029	0.0521173	0.0250313	0.0394432	0.0441926	0.0727273	0.045543	0.0453486	CDS	0
PCIF1	ENST00000372409	ENST00000372409_8_uORF_1	20_45934707-45934804|45937417-45937464	uORF	ATG	1.39e-07	4.24582e-07	0.60219	0.640194	0.201515	0.479167	0.628492	0.998092	0.296108	0.488679	0.480767	0.602843	trunc	0
PCMTD2	ENST00000308824	ENST00000308824_11_uoORF_1	20_64255749-64255870|64259941-64259991	uoORF	ATG	0.00087428	0.00213982	0.118989	0.104538	0.0932297	0.145967	0.0747768	0.246738	0.105735	0.0931264	0.115681	0.130094	trunc	0
PDIA5	ENST00000316218	ENST00000316218_12_uoORF_2	3_123067088-123067206|123089167-123089217	uoORF	GTG	0.0021178	0.00498345	0.142539	0.0763293	0.0734745	0.110054	0.0250836	0.226562	0.0898813	0.0711744	0.100599	0.103175	trunc	0
PELI1	ENST00000358912	ENST00000358912_5_uoORF_1	2-:64108296-64108379|64144080-64144207	uoORF	CTG	0.014936	0.0322185	0.211652	0.0703276	0.0778281	0.115641	0.0320781	0.313869	0.0714093	0.122109	0.118862	0.134866	CDS	0
PEX26	ENST00000399744	ENST00000399744_8_uORF_1	22_18078270-18078348	uORF	ATG	2.67e-09	8.60435e-09	0.345934	0.242739	0.10917	0.178744	0.189974	0.359926	0.169692	0.206349	0.219147	0.231485	trunc	0
PFN2	ENST00000239940	ENST00000239940_11_uoORF_6	3-:149970827-149970878	uoORF	CTG	0.0099472	0.0219106	0.105683	0.0455399	0.0675768	0.0808926	0.0291032	0.0828336	0.0696831	0.0493225	0.074923	0.0577356	trunc	0
PGAP4	ENST00000374848	ENST00000374848_8_uORF_1	9-:101487020-101487041	uORF	ATG	9.68e-05	0.000255726	0.258813	0.247878	0.219949	0.270548	0.0893617	0.233962	0.084507	0.178862	0.249297	0.146673	CDS	0
PGAP6	ENST00000431232	ENST00000431232_7_uORF_3	16-:381842-381941	uORF	ATG	8.66e-11	2.88309e-10	0.167474	0.106833	0.0286426	0.226389	0.0883234	0.235052	0.05444	0.116592	0.132335	0.123602	CDS	0
PGK1	ENST00000373316	ENST00000373316_5_uoORF_1	X_78104276-78104354	uoORF	ACG	0.00020181	0.000522075	0.0486338	0.017111	0.0303779	0.0255778	0.00661656	0.0366257	0.0311664	0.0390004	0.0304251	0.0283523	CDS	0
PGM1	ENST00000371084	ENST00000371084_8_uoORF_1	1_63593462-63593495	uoORF	CTG	2.19e-05	6.00548e-05	0.0824967	0.0688871	0.0263285	0.038954	0.0120729	0.140552	0.0471611	0.0613115	0.0541666	0.0652744	CDS	0
PGM2L1	ENST00000298198	ENST00000298198_5_uORF_1	11-:74398235-74398322	uORF	CTG	2.05e-09	6.62968e-09	0.183346	0.0697226	0.103494	0.110061	0.0483815	0.105145	0.105789	0.122267	0.116656	0.0953954	CDS	0
PGM2L1	ENST00000298198	ENST00000298198_5_uORF_2	11-:74398260-74398290	uORF	CTG	0.00011783	0.000309914	0.0351008	0.0224367	0.0176913	0.0238275	0.020536	0.0161472	0.0332818	0.0227577	0.0247641	0.0231807	CDS	0
PHB	ENST00000504124	ENST00000504124_6_uORF_2	17-:49414768-49414858	uORF	ATG	0.00041251	0.00104014	0.0157141	0.0173315	0.00742574	0.0115257	0.0147982	0.0164948	0.0194081	0.00961622	0.0129993	0.0150794	CDS	0
PHF23	ENST00000320316	ENST00000320316_8_uORF_2	17-:7239343-7239376	uORF	GTG	0.0020408	0.00481697	0.0788133	0.0352679	0.0193721	0.0195122	0.0991484	0.0500291	0.0905368	0.0539972	0.0382414	0.0734279	trunc	0
PIGC	ENST00000367728	ENST00000367728_1_uORF_1	1-:172442690-172442750	uORF	TTG	0.0013088	0.00315272	0.324773	0.350633	0.27791	0.330059	0.364017	0.492347	0.500491	0.344737	0.320844	0.425398	CDS	0
PIH1D1	ENST00000262265	ENST00000262265_10_uORF_8	19-:49451748-49451796	uORF	AGG	0.014418	0.0311493	0.0220746	0.0147794	0.0177665	0.0190616	0.0282258	0.0633708	0.0333874	0.0358387	0.0184205	0.0402057	CDS	0
PIH1D1	ENST00000262265	ENST00000262265_10_uORF_3	19-:49451692-49451746	uORF	ATG	1.58e-08	4.99444e-08	0.1686	0.241904	0.120015	0.173387	0.189919	0.213483	0.26872	0.235441	0.175976	0.226891	CDS	0
PIK3R4	ENST00000356763	ENST00000356763_8_uORF_3	3-:130746354-130746369	uORF	ATG	0.0016	0.0038159	0.0729432	0.0764956	0.0178665	0.069375	0.0794543	0.0108911	0.0347065	0.0281501	0.0591701	0.0383005	trunc	0
PIP4P1	ENST00000398020	ENST00000398020_6_uORF_2	14-:20461347-20461416	uORF	GTG	2.77e-05	7.55565e-05	0.188215	0.0814046	0.163961	0.0883978	0.0212551	0.230398	0.178191	0.0618182	0.130495	0.122916	CDS	0
PIP5K1A	ENST00000368888	ENST00000368888_9_uORF_1	1_151198654-151198732	uORF	ATG	6e-11	2.00321e-10	0.514444	0.421525	0.378472	0.456389	0.442413	0.705968	0.468932	0.291613	0.442708	0.477232	trunc	0
PKIB	ENST00000615438	ENST00000615438_4_uORF_0	6_122585939-122586007|122633282-122633367|122675077-122675104	uORF	ATG	0	0	2.27178	2.8	2.30851	1.88372	3.57258	2.64968	2.42664	4.02817	2.316	3.16927	CDS	0
PLA2G12A	ENST00000243501	ENST00000243501_10_uORF_0	4-:109729882-109729960	uORF	ATC	1.31e-14	4.96583e-14	1.32823	0.984877	1.08307	0.90991	0.582031	1.46522	1.66049	0.90303	1.07652	1.15269	trunc	0
PLAAT3	ENST00000323646	ENST00000323646_9_uORF_6	11-:63614295-63614328	uORF	ATG	9.54e-07	2.81623e-06	0.0550818	0.0123752	0.0323401	0.0555556	0.0143017	0.0183329	0.020527	0.0172899	0.0388382	0.0176129	CDS	0
PLAGL2	ENST00000246229	ENST00000246229_5_uORF_1	20-:32202272-32202292|32207640-32207740	uORF	ATG	5.36e-06	1.52347e-05	0.486974	0.290997	0.363363	0.357616	0.352217	0.952681	0.269394	0.383041	0.374737	0.489333	CDS	0
PLCXD1	ENST00000381657	ENST00000381657_8_PAR_Y_uORF_4	Y_281494-281545	uORF	CTG	0.020932	0.0442529	0.0462212	0.0400152	0.0311867	0.0656335	0.019564	0.0323671	0.0536248	0.0256983	0.0457642	0.0328136	CDS	0
PLCXD1	ENST00000381657	ENST00000381657_8_uORF_4	X_281494-281545	uORF	CTG	0.020932	0.0442529	0.0462212	0.0400152	0.0311867	0.0656335	0.019564	0.0323671	0.0536248	0.0256983	0.0457642	0.0328136	CDS	0
PLD3	ENST00000409587	ENST00000409587_5_uoORF_3	19_40366419-40366494	uoORF	TTG	1.34e-05	3.72481e-05	0.113252	0.0604632	0.0668005	0.051946	0.025785	0.0949711	0.0593795	0.0746155	0.0731153	0.0636878	trunc	0
POGK	ENST00000367876	ENST00000367876_9_uORF_1	1_166839536-166839548	uORF	ATG	0.0060105	0.0135303	0.248322	0.232645	0.170423	0.144792	0.0409511	0.589172	0.285781	0.394872	0.199045	0.327694	trunc	0
POLD2	ENST00000610533	ENST00000610533_6_uoORF_2	7-:44122042-44122109|44123510-44123527	uoORF	ATG	0.002352	0.00550888	0.176741	0.142532	0.0559914	0.0995912	0.221514	0.185155	0.202197	0.159192	0.118714	0.192014	CDS	0
POLR2M	ENST00000299638	ENST00000299638_8_uoORF_0	15_57706727-57706955|57708713-57708746	uoORF	ATG	0	0	3.098	2.1512	2.07071	2.41899	1.23429	1.62222	1.1036	2.51765	2.43473	1.61944	CDS	0
POLR3E	ENST00000299853	ENST00000299853_10_uORF_1	16_22297439-22297454	uORF	ATG	0.0016	0.0038159	0.607431	0.833708	0.408313	0.342956	0.384265	0.756563	0.826892	0.758419	0.548102	0.681535	trunc	0
POMK	ENST00000331373	ENST00000331373_10_uORF_1	8_43097556-43097615|43102504-43102538	uORF	ATG	7.29e-11	2.4303e-10	0.489715	0.428774	0.256595	0.425066	0.60499	0.981928	0.619284	0.535754	0.400037	0.685489	CDS	1
POMK	ENST00000331373	ENST00000331373_10_uORF_2	8_43097530-43097548	uORF	ATC	0.00097656	0.00237901	0.0431171	0.060241	0.00879297	0.0394391	0.0280665	0.151807	0.137957	0.0924092	0.0378975	0.10256	CDS	1
POT1	ENST00000655761	ENST00000655761_1_uORF_1	7-:124898354-124898374|124915573-124915646|124928814-124928937	uORF	ATG	2.22e-07	6.72637e-07	0.783439	0.969697	0.740196	0.433498	2.43678	1.16393	0.732609	0.530973	0.731708	1.21607	trunc	0
PPDPF	ENST00000370177	ENST00000370177_1_uORF_2	20_63520817-63520835	uORF	ATG	0.015625	0.0335	0.309647	0.430749	0.357927	0.407977	0.434365	0.886861	0.476575	0.549118	0.376575	0.58673	CDS	0
PPIA	ENST00000468812	ENST00000468812_6_uORF_6	7_44796683-44796722	uORF	TTG	7.54e-05	0.000200658	0.00750798	0.00357002	0.00190623	0.0020556	0.00713537	0.0136247	0.00490817	0.00631679	0.00375996	0.00799627	trunc	0
PPM1A	ENST00000395076	ENST00000395076_9_uORF_2	14_60249399-60249474	uORF	ATG	2.1e-11	7.08312e-11	0.212692	0.141313	0.187153	0.121835	0.157262	0.347625	0.0992366	0.152632	0.165748	0.189189	CDS	0
PPM1G	ENST00000344034	ENST00000344034_5_uORF_4	2-:27409443-27409473	uORF	ACG	0.00010681	0.000281359	0.0269903	0.0154479	0.00867706	0.0131116	0.00111721	0.0162639	0.0065046	0.0131671	0.0160567	0.00926319	CDS	0
PPP1R11	ENST00000376772	ENST00000376772_8_uoORF_1	6_30067301-30067451	uoORF	CTG	5.67e-05	0.000152151	0.771552	0.457627	0.374207	0.336152	0.407524	0.990164	0.529412	0.780627	0.484885	0.676931	trunc	0
PPP1R14B	ENST00000309318	ENST00000309318_8_uORF_2	11-:64246752-64246827	uORF	ATG	6.8e-09	2.16893e-08	0.124106	0.060791	0.116609	0.0554753	0.162701	0.287286	0.0472385	0.092067	0.0892453	0.147323	CDS	0
PPP1R15B	ENST00000367188	ENST00000367188_5_uORF_1	1-:204411486-204411642	uORF	ATG	0	0	0.850116	0.481939	0.513744	0.459893	0.535129	0.758398	0.409173	0.650104	0.576423	0.588201	CDS	0
PPP1R15B	ENST00000367188	ENST00000367188_5_uORF_2	1-:204411663-204411687	uORF	GTG	8.15e-06	2.29024e-05	0.340278	0.19962	0.132701	0.281283	0.0608899	0.282946	0.224371	0.15735	0.238471	0.181389	CDS	0
PPP2CA	ENST00000481195	ENST00000481195_6_uoORF_3	5-:134225809-134225878	uoORF	CTG	0.0019133	0.00453833	0.0428143	0.0273611	0.0205349	0.0296787	0.0117925	0.0591954	0.054566	0.066264	0.0300973	0.0479545	trunc	0
PPP2CA	ENST00000481195	ENST00000481195_6_uORF_4	5-:134225925-134226003	uORF	GTG	0.01045	0.0229611	0.0580846	0.0400527	0.116652	0.0246362	0.0146475	0.0681034	0.0589416	0.077456	0.0598565	0.0547871	trunc	0
PPP2R1A	ENST00000322088	ENST00000322088_11_uORF_2	19_52190060-52190075	uORF	CTG	0.0016	0.0038159	0.0307666	0.0309456	0.0225739	0.0390342	0.0332444	0.0788701	0.04682	0.0596837	0.0308301	0.0546546	trunc	0
PPP2R5A	ENST00000261461	ENST00000261461_7_uORF_2	1_212285636-212285651	uORF	ATG	0.0016	0.0038159	0.28877	0.125741	0.121786	0.133641	0.20332	0.177458	0.141767	0.215881	0.167485	0.184606	CDS	0
PPP2R5A	ENST00000261461	ENST00000261461_7_uORF_3	1_212285529-212285577	uORF	GTG	0.00047602	0.00119115	0.134581	0.0355872	0.0595399	0.0875576	0.118257	0.270983	0.129771	0.2134	0.0793165	0.183103	CDS	0
PPP4R3B	ENST00000616407	ENST00000616407_2_uORF_1	2-:55617575-55617590	uORF	ATG	0.0016	0.0038159	0.282306	0.253348	0.207113	0.188735	0.428571	0.563218	0.474679	0.834008	0.232875	0.575119	CDS	1
PPP4R3B	ENST00000616407	ENST00000616407_2_uORF_3	2-:55617350-55617419	uORF	ATG	7.84e-10	2.56147e-09	0.185686	0.214247	0.15795	0.0958498	0.550351	0.142529	0.153439	0.57085	0.163433	0.354292	CDS	1
PPP6R3	ENST00000393800	ENST00000393800_7_uORF_7	11_68460761-68460794	uORF	CTG	0.00023854	0.000613033	0.0289579	0.0094812	0.015307	0.0117553	0.0265695	0.0828579	0.0276408	0.0424206	0.0163754	0.0448722	trunc	0
PPP6R3	ENST00000393800	ENST00000393800_7_uORF_6	11_68519591-68519630	uORF	ATG	2.28e-08	7.16386e-08	0.0415294	0.024502	0.0162075	0.0581789	0.0203557	0.0424212	0.0227794	0.0231385	0.0351044	0.0271737	trunc	0
PPTC7	ENST00000354300	ENST00000354300_5_uORF_2	12-:110583230-110583302	uORF	ATG	9.68e-06	2.70979e-05	0.351609	0.0909091	0.27907	0.356275	0.409091	0.27541	0.211155	0.142857	0.269466	0.259628	CDS	0
PRAC1	ENST00000290294	ENST00000290294_5_uoORF_0	17-:48721883-48721899|48722317-48722454	uoORF	ATG	0.00033375	0.000846353	0.857868	1	1.16304	1.83607	0.948718	1.96825	1.21519	4.71429	1.21424	2.21161	CDS	0
PRAG1	ENST00000615670	ENST00000615670_5_uoORF_1	8-:8381725-8381834|8386320-8386385	uoORF	ATG	5.02e-11	1.68043e-10	0.158291	0.171326	0.145935	0.127589	0.174283	0.452652	0.18932	0.166525	0.150785	0.245695	trunc	0
PRCC	ENST00000271526	ENST00000271526_9_uORF_1	1_156767616-156767637	uORF	ATG	0.0022268	0.00522483	0.262534	0.483952	0.170189	0.26398	0.220485	0.325853	0.424917	0.348681	0.295164	0.329984	CDS	0
PRDX1	ENST00000262746	ENST00000262746_5_uORF_1	1-:45521671-45521716	uORF	ATG	0.00028609	0.000730171	0.00288789	0.000941659	0.00078804	0.00137123	0.00103834	0.00308365	0.00148458	0.00197861	0.00149721	0.00189629	trunc	0
PRDX2	ENST00000301522	ENST00000301522_3_uORF_4	19-:12801754-12801796	uORF	CTG	0.001709	0.00406856	0.0473265	0.0317349	0.0333299	0.0456864	0.0140623	0.0608984	0.0163407	0.0312286	0.0395194	0.0306325	trunc	0
PRKRIP1	ENST00000496391	ENST00000496391_5_uORF_3	7_102365985-102366076|102375822-102375890	uORF	ATG	0.0013522	0.00325139	0.467462	0.253571	0.460123	0.521595	0.243827	0.205405	0.406316	0.338279	0.425688	0.298457	CDS	0
PRKX	ENST00000262848	ENST00000262848_6_uORF_1	X-:3713350-3713575	uORF	ATG	1.42e-10	4.71033e-10	0.677048	0.349315	0.251807	0.277124	0.337995	0.640719	0.357553	0.742081	0.388824	0.519587	trunc	0
PROM1	ENST00000505450	ENST00000505450_5_uoORF_2	4-:16075817-16076039	uoORF	CTG	4.77e-06	1.35987e-05	0.0865595	0.0564818	0.0347117	0.052487	0.0490798	0.0865385	0.0476641	0.0616261	0.05756	0.0612271	CDS	0
PROM1	ENST00000505450	ENST00000505450_5_uORF_1	4-:16075908-16075929	uORF	ATG	0.00054399	0.00135509	0.0493891	0.043212	0.0178086	0.0408911	0.0375767	0.00961538	0.0309343	0.0362506	0.0378252	0.0285943	CDS	0
PROSER1	ENST00000352251	ENST00000352251_8_uORF_1	13-:39037785-39037938	uORF	ATG	1.14e-07	3.49677e-07	0.202786	0.0793167	0.0869198	0.0914502	0.266445	0.303512	0.157561	0.240033	0.115118	0.241888	CDS	1
PROSER1	ENST00000352251	ENST00000352251_8_uORF_3	13-:39037995-39038016	uORF	ATG	0.0022268	0.00522483	0.0459973	0.0448444	0.0126582	0.0275974	0.0474604	0.0652174	0.0325989	0.0789037	0.0327743	0.0560451	CDS	1
PRPF19	ENST00000227524	ENST00000227524_9_uoORF_1	11-:60906372-60906570	uoORF	CTG	1.64e-08	5.18186e-08	0.112279	0.0768448	0.0959041	0.113023	0.0691931	0.164694	0.105455	0.169231	0.0995127	0.127143	trunc	0
PRPF8	ENST00000572621	ENST00000572621_5_uORF_2	17-:1684790-1684832	uORF	CTG	2.2e-06	6.38314e-06	0.00473859	0.00160822	0.00248212	0.00729811	0.000391573	0.0110516	0.00407844	0.00374091	0.00403176	0.00481563	CDS	0
PRPS1	ENST00000372435	ENST00000372435_10_uORF_4	X_107628590-107628602	uORF	GTG	0.020285	0.0429347	0.0287576	0.0212743	0.0238359	0.0229941	0.0111757	0.0165556	0.0281941	0.0256273	0.0242155	0.0203882	trunc	0
PRPSAP2	ENST00000268835	ENST00000268835_7_uORF_4	17_18858158-18858182	uORF	ATG	0.0010428	0.00253112	0.0681774	0.0670547	0.0590291	0.110162	0.0657609	0.065233	0.0778754	0.0713765	0.0761058	0.0700614	CDS	0
PRR11	ENST00000262293	ENST00000262293_9_uORF_3	17_59155749-59155805|59169747-59169748	uORF	ATG	0.0044872	0.0102365	0.149351	0.144711	0.0377074	0.155416	0.0549944	0.195323	0.0796421	0.157353	0.121796	0.121828	trunc	0
PRRC1	ENST00000296666	ENST00000296666_13_uORF_1	5_127517730-127517776|127523459-127523473	uORF	ATA	0.00057216	0.00142248	0.118019	0.0474012	0.0255624	0.0251595	0.0439405	0.0965613	0.0315941	0.042199	0.0540355	0.0535737	CDS	0
PRRC2A	ENST00000376033	ENST00000376033_3_uoORF_1	6_31622773-31622860	uoORF	ATG	0.0044137	0.0100728	0.133352	0.131561	0.0690081	0.116612	0.0409576	0.0580599	0.0884991	0.0797147	0.112633	0.0668078	CDS	0
PRRC2A	ENST00000376033	ENST00000376033_3_uORF_3	6_31620802-31620858|31622689-31622777	uORF	ATC	5.22e-05	0.000140358	0.0676246	0.0298002	0.0237704	0.0389029	0.00545558	0.0708028	0.0316306	0.0505547	0.0400245	0.0396109	CDS	0
PRRC2B	ENST00000684596	ENST00000684596_1_uoORF_1	9_131430128-131430218	uoORF	ATG	0.020667	0.0437179	0.06658	0.0795131	0.0471267	0.0714612	0.026738	0.0393061	0.0356983	0.0299343	0.0661702	0.0329192	CDS	0
PRUNE1	ENST00000271620	ENST00000271620_8_uoORF_1	1_151008583-151008671|151017811-151017846	uoORF	AGG	0.0041717	0.00954057	0.304996	0.11802	0.191126	0.319361	0.115632	0.218855	0.285965	0.189895	0.233376	0.202587	trunc	0
PSEN1	ENST00000324501	ENST00000324501_10_uORF_1	14_73136527-73136542	uORF	CTG	0.0066639	0.0149438	0.10717	0.10104	0.0940741	0.0649536	0.0611222	0.10105	0.131097	0.014885	0.0918093	0.0770384	CDS	0
PSMB3	ENST00000619426	ENST00000619426_5_uORF_2	17_38752793-38752814	uORF	CTG	0.0061964	0.0139295	0.0690266	0.0636021	0.0373632	0.0516484	0.0320856	0.071841	0.0850231	0.0739922	0.0554101	0.0657355	trunc	0
PSMC5	ENST00000310144	ENST00000310144_11_uoORF_4	17_63827452-63827514|63828137-63828209|63829493-63829497	uoORF	ACG	1.14e-07	3.49677e-07	0.0990513	0.0562622	0.0336771	0.0663933	0.0264696	0.103329	0.0535209	0.0518182	0.063846	0.0587844	trunc	0
PSMD3	ENST00000264639	ENST00000264639_9_uORF_1	17_39980847-39980952	uORF	ATC	5.69e-05	0.000152673	0.0817701	0.0230985	0.0207524	0.0367147	0.0526683	0.0692372	0.027456	0.0678085	0.0405839	0.0542925	trunc	0
PSME3	ENST00000293362	ENST00000293362_7_uoORF_5	17_42833576-42833673|42834343-42834348	uoORF	CTG	0.00080217	0.00196875	0.127234	0.0659689	0.117707	0.0941847	0.0436118	0.15821	0.136735	0.167354	0.101274	0.126478	CDS	0
PSPC1	ENST00000619300	ENST00000619300_4_uoORF_4	13-:19782753-19782791|19782916-19782935	uoORF	ATG	0.0179	0.0381485	0.0447498	0.0267176	0.021343	0.0349536	0.0189274	0.0448839	0.045015	0.0420402	0.031941	0.0377166	CDS	0
PTBP1	ENST00000635647	ENST00000635647_1_uoORF_3	19_797483-797505|799412-799429	uoORF	CTG	0.0080385	0.017892	0.0204987	0.00900766	0.0114417	0.0227459	0.00802172	0.0483026	0.0156217	0.0105831	0.0159235	0.0206323	trunc	0
PTBP3	ENST00000334318	ENST00000334318_10_uoORF_3	9-:112330454-112330474|112333469-112333539	uoORF	CTG	0.019501	0.0414099	0.11645	0.0405911	0.0685264	0.0237278	0.0470876	0.109005	0.103608	0.144669	0.0623238	0.101092	trunc	0
PTBP3	ENST00000334318	ENST00000334318_10_uORF_5	9-:112333516-112333552	uORF	CTG	0.0010778	0.00261282	0.0292163	0.0199015	0.0318375	0.00829045	0.0269461	0.0733017	0.013064	0.0671923	0.0223114	0.045126	trunc	0
PTGES3	ENST00000614328	ENST00000614328_4_uORF_1	12-:56688129-56688171	uORF	CTG	0.0002072	0.000535215	0.0599849	0.0234939	0.0373405	0.0446981	0.015557	0.16126	0.027217	0.0928004	0.0413794	0.0742085	trunc	0
PTN	ENST00000348225	ENST00000348225_7_uORF_1	7-:137343466-137343532	uORF	CTG	0.00054831	0.00136562	0.208941	0.122255	0.129231	0.180473	0.0362694	0.177239	0.0619968	0.0724138	0.160225	0.0869797	trunc	0
PTP4A2	ENST00000647444	ENST00000647444_2_uORF_0	1-:31919562-31919628	uORF	ATG	2.19e-08	6.88921e-08	2.14417	1.7463	0.572476	0.674579	0.899821	3.27559	0.457075	0.464755	1.28438	1.27431	CDS	0
PTPN1	ENST00000371621	ENST00000371621_5_uORF_2	20_50510382-50510415	uORF	ATG	4.04e-05	0.000109161	0.174289	0.0820272	0.0883797	0.0499139	0.0607514	0.210616	0.101173	0.0738046	0.0986525	0.111586	trunc	0
PTPN13	ENST00000436978	ENST00000436978_5_uORF_1	4_86594602-86594764	uORF	CTG	1.67e-10	5.53085e-10	0.0945565	0.0555391	0.0719166	0.0447697	0.0586035	0.0286678	0.0408595	0.0901639	0.0666955	0.0545737	trunc	0
PTPN14	ENST00000366956	ENST00000366956_10_uORF_1	1-:214464862-214464937	uORF	CTG	7.31e-07	2.16732e-06	0.0851275	0.0726804	0.0399467	0.0562891	0.0628613	0.0674286	0.0782881	0.098283	0.0635109	0.0767152	CDS	0
PTPRA	ENST00000216877	ENST00000216877_10_uORF_1	20_2873565-2873673	uORF	ATC	4.26e-11	1.42831e-10	0.313386	0.171244	0.297968	0.137405	0.441667	0.693103	0.199708	0.607407	0.230001	0.485471	trunc	0
PTPRF	ENST00000359947	ENST00000359947_9_uORF_3	1_43530892-43531087	uORF	GTG	2.1e-05	5.76732e-05	0.033296	0.014104	0.0162276	0.0198881	0.00935039	0.0773522	0.0117194	0.0337553	0.0208789	0.0330443	CDS	0
PTTG1IP	ENST00000330938	ENST00000330938_8_uORF_1	21-:44873649-44873670	uORF	GTG	0.01696	0.0362349	0.0413958	0.0337079	0.0367191	0.0674107	0.0375051	0.0514567	0.0677424	0.104629	0.0448084	0.0653333	trunc	0
PVR	ENST00000425690	ENST00000425690_8_uoORF_2	19_44644008-44644175|44647222-44647355	uoORF	CTG	0.0016526	0.00393846	0.257426	0.174515	0.376344	0.266026	0.321773	0.192246	0.20786	0.442935	0.268578	0.291203	trunc	0
PWP1	ENST00000412830	ENST00000412830_8_uORF_1	12_107685855-107685873	uORF	ATG	0.00017114	0.000444578	0.173913	0.0982251	0.122626	0.1709	0.055194	0.112592	0.0882353	0.0491991	0.141416	0.0763051	CDS	0
QRSL1	ENST00000369046	ENST00000369046_8_uORF_1	6_106629591-106629609	uORF	ATG	0.012559	0.0273083	0.107177	0.114483	0.167549	0.140426	0.066586	0.191748	0.156169	0.0942928	0.132408	0.127199	trunc	0
RAB10	ENST00000264710	ENST00000264710_5_uORF_2	2_26034344-26034551	uORF	ATT	5.19e-06	1.47601e-05	0.175658	0.0725335	0.150225	0.117295	0.0967553	0.236037	0.0926982	0.164703	0.128928	0.147548	CDS	0
RAB10	ENST00000264710	ENST00000264710_5_uORF_5	2_26034393-26034468	uORF	CTG	0.010021	0.0220583	0.0230686	0.00996906	0.017991	0.0137841	0.00906168	0.0615027	0.0112456	0.0178212	0.0162032	0.0249078	CDS	0
RAB10	ENST00000264710	ENST00000264710_5_uORF_3	2_26034498-26034537	uORF	ACG	0.002172	0.00510689	0.163523	0.0525954	0.113043	0.102731	0.0473546	0.0611702	0.0518547	0.114113	0.107973	0.0686232	CDS	0
RAB10	ENST00000264710	ENST00000264710_5_uORF_4	2_26034107-26034170	uORF	GTG	7.12e-06	2.0087e-05	0.0594737	0.0458921	0.0734633	0.0657997	0.0704472	0.15492	0.0726279	0.0416786	0.0611572	0.0849185	CDS	0
RAB15	ENST00000533601	ENST00000533601_7_uORF_1	14-:64972119-64972143	uORF	ATG	6.1e-05	0.0001633	1.36446	0.276596	0.864286	0.651452	0.266055	2.65657	0.752137	0.729282	0.789198	1.10101	trunc	0
RAB1A	ENST00000409784	ENST00000409784_8_uoORF_1	2-:65129902-65129941	uoORF	GTG	5.03e-06	1.43176e-05	0.129745	0.0861798	0.122495	0.0911922	0.0324851	0.147577	0.125481	0.131123	0.107403	0.109167	trunc	0
RAB1A	ENST00000409784	ENST00000409784_8_uORF_2	2-:65129916-65130036	uORF	ACG	0.0060422	0.0136006	0.0902188	0.0467343	0.0451595	0.0516014	0.0517055	0.151353	0.0536763	0.0640884	0.0584285	0.0802058	trunc	0
RAB23	ENST00000468148	ENST00000468148_6_uORF_1	6-:57222140-57222209	uORF	CTG	1.55e-05	4.29591e-05	0.273913	0.209343	0.221818	0.116456	0.025641	0.288462	0.185049	0.147619	0.205382	0.161693	trunc	0
RAB2A	ENST00000262646	ENST00000262646_12_uORF_6	8_60517123-60517195	uORF	CTG	0.0064788	0.0145465	0.0567376	0.0146413	0.0347454	0.0154077	0.0303808	0.0816327	0.0448049	0.0512972	0.030383	0.0520289	CDS	0
RAB34	ENST00000395245	ENST00000395245_9_uoORF_2	17-:28716052-28716058|28716902-28716994|28717212-28717747	uoORF	GTG	1.07e-13	3.73728e-13	0.312582	0.166135	0.225984	0.259259	0.175807	0.318083	0.174095	0.271545	0.24099	0.234883	CDS	0
RAB5IF	ENST00000373852	ENST00000373852_9_uoORF_4	20_36605847-36605955	uoORF	CTG	0.00016643	0.000432919	0.632339	0.148605	0.451009	0.186732	0.0994505	0.567901	0.297659	0.498054	0.354671	0.365766	CDS	0
RAB6A	ENST00000336083	ENST00000336083_8_uORF_5	11-:73760919-73761039	uORF	GTG	0.001087	0.00263447	0.101673	0.0388453	0.0582451	0.0934125	0.0291556	0.348969	0.0941235	0.120726	0.0730439	0.148244	CDS	0
RAB9A	ENST00000464506	ENST00000464506_2_uORF_1	X_13703832-13703850	uORF	ATG	0.00097656	0.00237901	0.0787992	0.0560399	0.0986267	0.0745413	0.0769231	0.00794224	0.114754	0.117413	0.0770018	0.0792581	CDS	0
RAB9A	ENST00000464506	ENST00000464506_2_uORF_2	X_13689171-13689288|13703813-13703876	uORF	CTG	0.0022297	0.00523121	0.148687	0.0722291	0.154806	0.0848624	0.0519751	0.166787	0.0860656	0.0706468	0.115146	0.0938686	CDS	0
RAC1	ENST00000348035	ENST00000348035_9_uoORF_2	7_6374700-6374736	uoORF	CTG	0.008162	0.0181064	0.0529304	0.0514117	0.100011	0.0453018	0.00813963	0.147428	0.0179303	0.0777644	0.0624138	0.0628155	CDS	0
RAD54L	ENST00000371975	ENST00000371975_9_uORF_1	1_46248245-46248281	uORF	ATG	3.23e-07	9.7232e-07	0.233677	0.221532	0.177979	0.121756	0.272537	0.12114	0.20045	0.18578	0.188736	0.194977	trunc	0
RAD54L2	ENST00000684192	ENST00000684192_1_uORF_5	3_51590383-51590395	uORF	ATG	0.0060105	0.0135303	0.450159	0.197321	0.380661	0.285968	0.191898	0.152055	0.325283	0.422846	0.328527	0.27302	trunc	0
RAF1	ENST00000442415	ENST00000442415_7_uORF_2	3-:12663905-12664010	uORF	CTG	1.53e-08	4.83795e-08	0.163298	0.0831765	0.120435	0.22541	0.196863	0.282875	0.208633	0.354887	0.14808	0.260814	CDS	0
RAF1	ENST00000442415	ENST00000442415_7_uORF_5	3-:12664058-12664088	uORF	ATG	3.81e-06	1.0916e-05	0.093169	0.069251	0.045843	0.0721311	0.136471	0.248471	0.23741	0.222556	0.0700985	0.211227	CDS	0
RALGAPB	ENST00000262879	ENST00000262879_11_uORF_1	20_38472908-38473001	uORF	CTG	6.6e-06	1.86668e-05	0.109335	0.107038	0.115489	0.131803	0.101631	0.134367	0.155799	0.265672	0.115916	0.164367	trunc	0
RALGPS2	ENST00000367635	ENST00000367635_8_uORF_1	1_178776686-178776710	uORF	ATG	4.81e-06	1.37074e-05	0.57909	0.490164	0.372146	0.554371	0.530271	0.305322	0.476318	0.528169	0.498943	0.46002	trunc	0
RALGPS2	ENST00000367635	ENST00000367635_8_uORF_4	1_178725299-178725341	uORF	ATG	1.11e-05	3.09901e-05	0.225894	0.0508197	0.053653	0.15032	0.0271399	0.439776	0.165444	0.369718	0.120172	0.250519	trunc	0
RALY	ENST00000246194	ENST00000246194_8_uORF_3	20_34031544-34031562	uORF	GTG	0.012559	0.0273083	0.065776	0.0498791	0.0873342	0.073773	0.0327807	0.0321962	0.126744	0.087695	0.0691906	0.0698541	CDS	0
RAMACL	ENST00000444122	ENST00000444122_2_uoORF_10	6-:166586473-166586515	uoORF	AAG	0.00029012	0.000739812	0.10005	0.0458505	0.153505	0.0227941	0.038848	0.0246624	0.137008	0.13308	0.0805499	0.0833994	trunc	0
RANBP1	ENST00000402752	ENST00000402752_5_uoORF_4	22_20117558-20117664|20119012-20119023	uoORF	ACG	3.42e-09	1.09862e-08	0.148664	0.0849252	0.11835	0.0642438	0.026202	0.227599	0.105547	0.168755	0.104046	0.132026	trunc	0
RANBP9	ENST00000011619	ENST00000011619_6_uORF_1	6-:13711517-13711538	uORF	GTG	9.68e-05	0.000255726	0.0770684	0.048164	0.0548977	0.0577819	0.0473988	0.0546358	0.04329	0.0569801	0.059478	0.0505762	trunc	0
RANGAP1	ENST00000356244	ENST00000356244_8_uORF_1	22-:41286067-41286097	uORF	CTG	0.010206	0.0224469	0.0470532	0.0327135	0.0350848	0.0128422	0.0104435	0.0565831	0.0234594	0.0395548	0.0319234	0.0325102	CDS	0
RANGAP1	ENST00000356244	ENST00000356244_8_uORF_2	22-:41286117-41286168	uORF	GTG	0.0048957	0.0111139	0.022874	0.00585399	0.0186335	0.0145319	0.0122597	0.0269592	0.0165596	0.016995	0.0154734	0.0181934	CDS	0
RAP2A	ENST00000245304	ENST00000245304_5_uORF_1	13_97434281-97434425	uORF	ATG	1.54e-05	4.2686e-05	0.195853	0.252747	0.16092	0.126615	0.185185	0.412214	0.131274	0.191837	0.184034	0.230127	CDS	0
RAP2B	ENST00000323534	ENST00000323534_5_uORF_1	3_153162235-153162322	uORF	GTG	3.82e-06	1.09415e-05	0.320577	0.268555	0.237126	0.308271	0.0581162	0.313793	0.181127	0.238754	0.283632	0.197948	trunc	0
RAP2C	ENST00000342983	ENST00000342983_6_uORF_1	X-:132217954-132217969	uORF	ATG	0.0081	0.017977	0.215546	0.153279	0.244083	0.174185	0.0507614	0.162194	0.090678	0.128012	0.196773	0.107911	CDS	0
RASA1	ENST00000274376	ENST00000274376_11_uORF_2	5_87267983-87268064	uORF	ATG	3.28e-05	8.91603e-05	0.197531	0.105787	0.0626609	0.0558712	0.0612245	0.314286	0.0718232	0.0957447	0.105463	0.13577	trunc	0
RBM15B	ENST00000563281	ENST00000563281_2_uORF_1	3_51391306-51391363	uORF	ATG	0.0007637	0.0018789	0.0885522	0.114509	0.133758	0.0771028	0.0889121	0.146508	0.0436331	0.129206	0.103481	0.102065	CDS	0
RBM27	ENST00000265271	ENST00000265271_7_uORF_1	5_146203651-146203684	uORF	ATG	0.0019383	0.00459503	0.0564878	0.0539946	0.0492296	0.038003	0.0152727	0.0587789	0.0322691	0.0579167	0.0494288	0.0410593	CDS	0
RBMXL1	ENST00000399794	ENST00000399794_6_uORF_5	1-:88983960-88984002	uORF	ATG	4.46e-07	1.33709e-06	0.00575678	0.011026	0.0020829	0.00861901	0.00756561	0.00434397	0.00618926	0.00755597	0.00687117	0.0064137	CDS	0
RCOR1	ENST00000262241	ENST00000262241_7_uORF_1	14_102592672-102592714	uORF	ATG	0.0005633	0.00140153	0.139633	0.124782	0.0365059	0.108545	0.027193	0.0742857	0.0872113	0.131268	0.102367	0.0799896	trunc	0
REPIN1	ENST00000489432	ENST00000489432_7_uORF_2	7_150368872-150368941|150369670-150369703	uORF	GTG	1.8e-05	4.9667e-05	0.205951	0.113772	0.137529	0.197165	0.010582	0.234783	0.122807	0.146881	0.163604	0.128763	CDS	0
REPS1	ENST00000450536	ENST00000450536_7_uORF_4	6-:138988147-138988207	uORF	ATG	3.75e-05	0.000101531	0.0483592	0.0288828	0.0327675	0.0204	0.0210526	0.0773639	0.048397	0.0418338	0.0326024	0.0471618	CDS	0
RESF1	ENST00000312561	ENST00000312561_9_uORF_1	12_31970324-31970336	uORF	ATG	0.015625	0.0335	0.0333497	0.0779587	0.0215517	0.0303636	0.0293706	0.00898693	0.0222035	0.023511	0.0408059	0.021018	trunc	0
RFC1	ENST00000381897	ENST00000381897_5_uORF_3	4-:39366298-39366319	uORF	ATG	0.00054399	0.00135509	0.0932345	0.0882689	0.0384019	0.0852792	0.0567164	0.110115	0.080896	0.0950882	0.0762961	0.0857038	trunc	0
RFXANK	ENST00000407360	ENST00000407360_7_uORF_3	19_19192940-19193033	uORF	TTG	0.00066133	0.00163515	0.128861	0.0516266	0.0452381	0.0716544	0.0829876	0.107563	0.117995	0.0327869	0.074345	0.0853332	CDS	0
RGS5	ENST00000313961	ENST00000313961_10_uORF_2	1-:163202862-163202892	uORF	CTG	0.00043303	0.00108888	0.0942652	0.0360316	0.058642	0.0406417	0.103187	0.114286	0.0719776	0.0675325	0.0573951	0.0892456	CDS	0
RHEB	ENST00000262187	ENST00000262187_10_uORF_2	7-:151519524-151519545	uORF	ATG	0.015625	0.0335	0.443969	0.116279	0.335631	0.183685	0.222624	0.118388	0.210042	0.237197	0.269891	0.197063	trunc	0
RHEB	ENST00000262187	ENST00000262187_10_uORF_1	7-:151519544-151519610	uORF	ATG	3.02e-08	9.44641e-08	0.838727	0.189877	0.5796	0.239179	0.128507	1.04282	0.196135	0.81761	0.461846	0.546268	trunc	0
RHOH	ENST00000610353	ENST00000610353_4_uORF_1	4_40242721-40242745	uORF	ATG	0.0030679	0.00711286	0.102204	0.191176	0.0105263	0.0588235	0.0935754	0.197605	0.227371	0.153558	0.0906827	0.168027	trunc	0
RHOH	ENST00000610353	ENST00000610353_4_uORF_2	4_40197084-40197246	uORF	GTG	0.0032537	0.00752694	0.180361	0.0404412	0.178947	0.145098	0.106145	0.341317	0.207974	0.121723	0.136212	0.19429	trunc	0
RHOH	ENST00000610353	ENST00000610353_4_uORF_3	4_40243306-40243333	uORF	ATG	0.0015265	0.00365429	0.0741483	0.319853	0.0947368	0.313725	0.0726257	0.00199601	0.211746	0.191011	0.200616	0.119345	trunc	0
RING1	ENST00000374656	ENST00000374656_5_uORF_2	6_33208521-33208554	uORF	ATG	6.3e-05	0.000168501	0.0927552	0.0524887	0.0772105	0.075431	0.0716912	0.168372	0.0658588	0.116129	0.0744713	0.105513	CDS	0
RIOK1	ENST00000379834	ENST00000379834_7_uORF_3	6_7389889-7389952	uORF	ATG	3.1e-05	8.43535e-05	0.173754	0.138708	0.1083	0.172131	0.0955766	0.188969	0.0910088	0.168038	0.148223	0.135898	CDS	0
RMND5A	ENST00000283632	ENST00000283632_5_uORF_1	2_86720336-86720354	uORF	ATC	0.0033436	0.00772515	0.130806	0.0543284	0.13344	0.020197	0.0573043	0.151515	0.113583	0.0966702	0.0846928	0.104768	CDS	0
RNF10	ENST00000325954	ENST00000325954_9_uoORF_3	12_120534696-120534957	uoORF	ATG	3.72e-11	1.24854e-10	0.386642	0.245786	0.309052	0.268901	0.551627	0.615152	0.336729	0.580029	0.302595	0.520884	trunc	1
RNF11	ENST00000242719	ENST00000242719_4_uORF_0	1_51236326-51236431	uORF	ATG	9.07e-10	2.96036e-09	1.55385	0.971795	1.4491	0.819572	0.74026	1.97605	0.623301	0.985	1.19858	1.08115	CDS	0
RNF122	ENST00000256257	ENST00000256257_2_uoORF_1	8-:33566722-33566776	uoORF	CTG	0.0026212	0.00611641	0.164282	0.0468198	0.117588	0.0705694	0.00362319	0.234097	0.0763052	0.188235	0.0998148	0.125565	trunc	0
RNF138	ENST00000261593	ENST00000261593_8_uORF_3	18_32091999-32092050	uORF	ATG	4.96e-07	1.48349e-06	0.302874	0.171815	0.222091	0.221828	0.162005	0.317721	0.155855	0.251894	0.229652	0.221869	CDS	0
RNF138	ENST00000261593	ENST00000261593_8_uORF_5	18_32091930-32091984	uORF	CTG	0.0003883	0.000980526	0.094817	0.0448582	0.0821028	0.0581148	0.0406332	0.233411	0.059923	0.129735	0.0699732	0.115926	CDS	0
RNF144A	ENST00000320892	ENST00000320892_11_uORF_1	2_6940949-6941051	uORF	ATC	0.00020588	0.000531993	0.59952	0.33871	0.393365	0.588235	0.222222	0.271739	0.157718	0.347826	0.479958	0.249876	trunc	0
RNF146	ENST00000610153	ENST00000610153_1_uORF_1	6_127280238-127280289	uORF	ATG	0.0013065	0.0031477	0.322353	0.380051	0.216749	0.090379	0.335013	0.228916	0.338192	0.22	0.252383	0.28053	trunc	0
RNF168	ENST00000318037	ENST00000318037_3_uORF_2	3-:196503293-196503395	uORF	ATG	8.01e-15	3.1956e-14	0.134183	0.16863	0.0981194	0.132035	0.12031	0.0942111	0.0492884	0.114778	0.133242	0.0946469	CDS	0
RNF168	ENST00000318037	ENST00000318037_3_uORF_1	3-:196503548-196503659	uORF	ACG	7.21e-07	2.13811e-06	0.551724	0.460972	0.264922	0.50974	0.833118	0.92622	0.405762	0.880918	0.44684	0.761505	CDS	0
RNF168	ENST00000318037	ENST00000318037_3_uORF_3	3-:196503714-196503759	uORF	GTG	0.00069099	0.00170561	0.137181	0.056701	0.055601	0.0670996	0.173351	0.174801	0.15932	0.104735	0.0791457	0.153052	CDS	0
RNF216	ENST00000389902	ENST00000389902_8_uORF_1	7-:5761100-5761124	uORF	ATG	8.15e-06	2.29024e-05	0.254198	0.293817	0.145695	0.23083	0.136997	0.160441	0.261141	0.147442	0.231135	0.176505	CDS	0
RNF26	ENST00000311413	ENST00000311413_5_uORF_2	11_119334533-119334578	uORF	ATG	7.8e-05	0.00020737	0.33231	0.823183	0.474903	0.406028	0.15276	0.971284	0.402299	0.554604	0.509106	0.520237	trunc	0
RNF26	ENST00000311413	ENST00000311413_5_uORF_1	11_119334866-119335034	uORF	ATG	5.41e-09	1.73048e-08	0.550269	1.03536	0.492278	0.542553	0.419769	1.22297	0.591236	0.668094	0.655116	0.725518	trunc	0
RNF40	ENST00000324685	ENST00000324685_11_uORF_3	16_30762331-30762349	uORF	ATG	0.0041152	0.00941724	0.0960155	0.0864756	0.0558659	0.0441826	0.0942285	0.121019	0.0947621	0.11236	0.0706349	0.105592	CDS	0
RNF41	ENST00000345093	ENST00000345093_9_uORF_2	12-:56216532-56216574	uORF	ATG	0.00025664	0.000657357	0.444292	0.561668	0.480499	0.548697	0.435508	0.352406	0.533237	0.422374	0.508789	0.435881	CDS	0
RNF44	ENST00000274811	ENST00000274811_9_uORF_8	5-:176537255-176537300	uORF	ATG	9.34e-09	2.96521e-08	0.0382903	0.0767475	0.0444749	0.0348525	0.0165331	0.10208	0.0787633	0.0679157	0.0485913	0.0663231	trunc	0
RNF5	ENST00000375094	ENST00000375094_4_uORF_1	6_32178461-32178482	uORF	ATG	0.0018383	0.00436291	0.0568342	0.0450113	0.0404738	0.0795107	0.0112782	0.0457491	0.0565111	0.0452722	0.0554575	0.0397027	CDS	0
RNMT	ENST00000262173	ENST00000262173_7_uORF_1	18_13731484-13731511	uORF	ATG	5.95e-06	1.68707e-05	0.0430795	0.0240077	0.0608108	0.0401146	0.0136687	0.0654206	0.0504713	0.0243711	0.0420031	0.0384829	CDS	0
ROCK1	ENST00000399799	ENST00000399799_3_uORF_3	18-:21111214-21111241	uORF	ATG	0.0022123	0.00519497	0.0650285	0.0216143	0.0589155	0.0112461	0.0193861	0.00677966	0.0234657	0.0351494	0.0392011	0.0211952	CDS	1
ROCK1	ENST00000399799	ENST00000399799_3_uORF_1	18-:21111553-21111574	uORF	CTG	0.00054399	0.00135509	0.10878	0.0239784	0.0109489	0.0184435	0.0177706	0.254237	0.0541516	0.0984183	0.0405378	0.106144	CDS	1
RPL13	ENST00000393099	ENST00000393099_3_uORF_3	16_89560761-89560839	uORF	CTG	2.82e-09	9.08074e-09	0.00696996	0.0069625	0.00354683	0.00380066	0.00303039	0.00838998	0.00455356	0.00310377	0.00531999	0.00476943	CDS	0
RPL14	ENST00000338970	ENST00000338970_10_uORF_3	3_40457311-40457350	uORF	ATG	6.47e-07	1.92333e-06	0.00623171	0.00125682	0.00121911	0.00166798	0.00170569	0.00455187	0.00230577	0.00425532	0.0025939	0.00320466	trunc	0
RPL17	ENST00000579408	ENST00000579408_5_uORF_4	18-:49491691-49491775	uORF	CTG	8.94e-06	2.50551e-05	0.0251075	0.0246262	0.0213693	0.0194571	0.00811945	0.023938	0.0178673	0.0106808	0.02264	0.0151514	trunc	0
RPL18A	ENST00000222247	ENST00000222247_10_uoORF_2	19_17859930-17859960	uoORF	GTG	0.011182	0.0244777	0.00194076	0.00142929	0.000731582	0.00114179	0.00971997	0.00371432	0.00290754	0.00269948	0.00131085	0.00476033	trunc	0
RPL27	ENST00000589913	ENST00000589913_6_uORF_2	17_42998620-42998650	uORF	TTG	0.0048905	0.0111047	0.00936954	0.00590556	0.00436546	0.00159397	0.0053484	0.0107392	0.00654682	0.00888758	0.00530863	0.00788049	CDS	0
RPL27	ENST00000589913	ENST00000589913_6_uORF_4	17_42998709-42998721	uORF	ACG	0.015625	0.0335	0.00382722	0.00647559	0.000897861	0.00377109	0.000871368	0.000550055	0.00292659	0.00301718	0.00374294	0.0018413	CDS	0
RPL39	ENST00000361575	ENST00000361575_4_uORF_2	X-:119791590-119791608	uORF	ATC	0.0001286	0.00033697	0.14167	0.046529	0.0882613	0.0956226	0.223481	0.140417	0.110213	0.166306	0.0930206	0.160104	trunc	0
RPL41	ENST00000546591	ENST00000546591_6_uORF_3	12_56116732-56116747	uORF	ATC	0.0066639	0.0149438	0.0391	0.0282097	0.0117306	0.0188214	0.0129719	0.0284871	0.0140782	0.0246701	0.0244654	0.0200518	trunc	0
RPL5	ENST00000370321	ENST00000370321_8_uoORF_5	1_92832062-92832117|92833388-92833399	uoORF	CTG	0.00037163	0.000939566	0.0157279	0.00315708	0.00867603	0.0105065	0.00372166	0.022581	0.00614274	0.0127719	0.00951686	0.0113043	trunc	0
RPL8	ENST00000528957	ENST00000528957_6_uORF_4	8-:144792306-144792339	uORF	ATG	0.0024362	0.00569835	0.0194743	0.0105482	0.00984907	0.00821844	0.00292615	0.0123883	0.00392613	0.00855886	0.0120225	0.00694987	trunc	0
RPL9	ENST00000449470	ENST00000449470_6_uORF_9	4-:39458761-39458800	uORF	TTG	0.00047641	0.00119202	0.00704027	0.00348475	0.0015858	0.0025852	0.00250295	0.00547487	0.00569019	0.00656276	0.00367401	0.00505769	CDS	0
RPL9	ENST00000449470	ENST00000449470_6_uORF_8	4-:39458653-39458746	uORF	ATG	0.0012287	0.0029649	0.0144864	0.00910452	0.00343591	0.00853117	0.00674407	0.0103257	0.00673357	0.0110531	0.00888949	0.00871409	CDS	0
RPL9	ENST00000449470	ENST00000449470_6_uoORF_4	4-:39458435-39458795	uoORF	CTG	2.57e-05	7.01927e-05	0.0345485	0.0174483	0.0117047	0.0171485	0.0282625	0.0277998	0.0180494	0.0265964	0.0202125	0.0251771	CDS	0
RPS14	ENST00000401695	ENST00000401695_8_uORF_1	5-:150449601-150449631	uORF	ACG	0.010206	0.0224469	0.0144741	0.00982151	0.00649494	0.00896103	0.00759571	0.0166496	0.0239059	0.0189441	0.00993789	0.0167739	trunc	0
RPS26	ENST00000356464	ENST00000356464_10_uoORF_7	12_56042107-56042169|56042424-56042425	uoORF	ATG	3.98e-05	0.00010756	0.00718799	0.00375099	0.0126206	0.00695376	0.00780187	0.00520388	0.00493978	0.00647347	0.00762833	0.00610475	trunc	0
RPS26	ENST00000356464	ENST00000356464_10_uORF_4	12_56041949-56041973	uORF	ATG	0.013209	0.0286578	0.014348	0.0109967	0.0127889	0.00953658	0.0119229	0.0220822	0.0134624	0.0108734	0.0119175	0.0145852	trunc	0
RPS26	ENST00000356464	ENST00000356464_10_uORF_5	12_56042015-56042063	uORF	ATG	2.14e-07	6.48801e-07	0.00964004	0.00806113	0.00555306	0.00874187	0.0130831	0.0138998	0.0163592	0.00829414	0.00799903	0.0129091	trunc	0
RPS6KB1	ENST00000225577	ENST00000225577_9_uoORF_1	17_59893143-59893188	uoORF	ATG	1.06e-06	3.12253e-06	0.157414	0.140998	0.226107	0.0724947	0.142626	0.199647	0.10458	0.122807	0.149253	0.142415	trunc	0
RPTOR	ENST00000306801	ENST00000306801_8_uORF_5	17_80544848-80544872	uORF	ATG	0.00025528	0.00065393	0.065698	0.00115875	0.0873309	0.0205224	0.0846262	0.264901	0.0657318	0.0810185	0.0436775	0.124069	trunc	0
RPTOR	ENST00000306801	ENST00000306801_8_uORF_2	17_80545074-80545134	uORF	ATG	1.9e-05	5.23179e-05	0.159823	0.143685	0.0824108	0.195896	0.114245	0.172185	0.12007	0.208333	0.145454	0.153709	trunc	0
RPTOR	ENST00000306801	ENST00000306801_8_uORF_4	17_80544876-80544921	uORF	ATG	3.1e-05	8.43535e-05	0.0890714	0.126304	0.0516605	0.0522388	0.0394922	0.188079	0.114812	0.068287	0.0798186	0.102668	trunc	0
RSPRY1	ENST00000537866	ENST00000537866_5_uORF_3	16_57186339-57186483	uORF	ATG	6.2e-09	1.9795e-08	0.162252	0.165	0.0186916	0.0817439	0.0584958	0.567944	0.1652	0.566038	0.106922	0.33942	trunc	0
RSPRY1	ENST00000537866	ENST00000537866_5_uORF_2	16_57204541-57204658	uORF	ATG	1.29e-12	4.42858e-12	0.267108	0.49	0.14486	0.378747	0.325905	0.28223	0.29912	0.40566	0.320179	0.328229	trunc	0
RTN4IP1	ENST00000369063	ENST00000369063_8_uORF_1	6-:106629203-106629263	uORF	ATG	0.0051571	0.0116901	0.264609	0.118421	0.157588	0.176166	0.151194	0.0582822	0.0508772	0.153094	0.179196	0.103362	CDS	0
RWDD1	ENST00000466444	ENST00000466444_7_uoORF_1	6_116571560-116571644	uoORF	ATG	2.75e-09	8.8602e-09	0.37155	0.21574	0.14346	0.243924	0.0662757	0.502955	0.230769	0.259102	0.243668	0.264776	CDS	0
S100A13	ENST00000440685	ENST00000440685_7_uoORF_2	1-:153626471-153626504	uoORF	TTG	0.0059048	0.0133149	0.0774466	0.056245	0.0634409	0.0779862	0.0144928	0.110793	0.0612351	0.158698	0.0687797	0.0863048	CDS	0
SALL1	ENST00000251020	ENST00000251020_9_uoORF_1	16-:51142010-51142145|51151165-51151267	uoORF	CTG	3.19e-06	9.18548e-06	0.0645705	0.053012	0.0506864	0.0609524	0.00221239	0.193478	0.0618619	0.0473373	0.0573053	0.0762224	trunc	0
SALL3	ENST00000537592	ENST00000537592_7_uORF_2	18_78980105-78980132	uORF	ATG	0.00098863	0.00240702	0.0421793	0.0580704	0.0329106	0.0452411	0.000933707	0.0236376	0.0379747	0.000696379	0.0446004	0.0158106	trunc	0
SAMD4B	ENST00000610417	ENST00000610417_4_uORF_2	19_39356767-39356812	uORF	ACG	0.00010545	0.000277976	0.179875	0.246407	0.180416	0.249818	0.215919	0.11856	0.12241	0.211433	0.214129	0.167081	CDS	0
SAT1	ENST00000379270	ENST00000379270_5_uoORF_1	X_23783277-23783367	uoORF	ATG	9.52e-17	4.86498e-16	1.09838	0.850346	1.6462	0.854478	1.10909	0.499285	1.70769	1.32727	1.11235	1.16084	CDS	0
SAT1	ENST00000379270	ENST00000379270_5_uORF_0	X_23783234-23783249	uORF	ATG	0.00041649	0.00104909	2.16079	1.71367	1.91115	1.81592	0.831818	1.68097	2.40513	2.57091	1.90038	1.87221	CDS	0
SBK1	ENST00000341901	ENST00000341901_5_uORF_3	16_28293178-28293223	uORF	CTG	0.0081408	0.0180635	0.270523	0.201984	0.247379	0.0926916	0.124764	0.107402	0.128118	0.200456	0.203145	0.140185	trunc	0
SBNO1	ENST00000602398	ENST00000602398_3_uORF_1	12-:123364817-123364835	uORF	ATG	0.0041152	0.00941724	0.0757797	0.0599274	0.0363257	0.0780347	0.0268892	0.109777	0.0337763	0.0641809	0.0625169	0.0586559	trunc	0
SCARB1	ENST00000339570	ENST00000339570_9_uoORF_1	12-:124863595-124863901	uoORF	ATG	0.00077463	0.00190308	0.313428	0.159772	0.211268	0.208826	0.0692925	0.20098	0.104029	0.191019	0.223324	0.14133	trunc	0
SCD	ENST00000370355	ENST00000370355_3_uORF_3	10_100347328-100347364	uORF	ATT	0.012383	0.0269837	0.0167613	0.0124977	0.0093715	0.00928452	0.00835042	0.035146	0.0126297	0.0136023	0.0119787	0.0174321	CDS	0
SCD	ENST00000370355	ENST00000370355_3_uORF_5	10_100347288-100347321	uORF	ATA	0.010742	0.0235709	0.00526548	0.00290537	0.00442132	0.00323418	0.00213566	0.0194172	0.00496969	0.00519449	0.00395659	0.00792926	CDS	0
SCML2	ENST00000251900	ENST00000251900_9_uORF_1	X-:18354656-18354674	uORF	ATG	0.0001286	0.00033697	0.12932	0.0660161	0.0384615	0.077	0.00137741	0.101215	0.0494505	0.0567227	0.0776994	0.0521913	trunc	0
SCNN1A	ENST00000360168	ENST00000360168_7_uoORF_2	12-:6374917-6375046	uoORF	TTG	5.43e-07	1.62075e-06	0.106618	0.0626769	0.0372024	0.0527027	0.0657483	0.0632184	0.0755931	0.0536056	0.0647999	0.0645413	trunc	0
SDF4	ENST00000360001	ENST00000360001_12_uoORF_3	1-:1228699-1228912	uoORF	CTG	0.00020829	0.000537793	0.237652	0.148256	0.201739	0.152079	0.113058	0.235812	0.155712	0.290865	0.184932	0.198862	trunc	0
SEC63	ENST00000369002	ENST00000369002_9_uORF_4	6-:107958036-107958099	uORF	ACG	0.01927	0.0409521	0.0554792	0.0287705	0.0254237	0.0382395	0.0221963	0.0546386	0.0213338	0.0654206	0.0369782	0.0408973	trunc	0
SEC63	ENST00000369002	ENST00000369002_9_uORF_5	6-:107958148-107958196	uORF	CTG	0.00011534	0.000303501	0.0312607	0.0137109	0.029661	0.0194805	0.0369938	0.0643142	0.0246523	0.0694259	0.0235283	0.0488465	trunc	0
SEC63	ENST00000369002	ENST00000369002_9_uoORF_2	6-:107957980-107958067	uoORF	GTG	0.0030803	0.00713934	0.0984198	0.0424815	0.0432203	0.0533911	0.0833333	0.104155	0.062737	0.0841121	0.0593782	0.0835843	trunc	0
SEM1	ENST00000248566	ENST00000248566_3_uORF_3	7-:96709824-96709845	uORF	GTG	0.00054399	0.00135509	0.0186863	0.0142954	0.030179	0.0178446	0.0524996	0.0845283	0.0164033	0.029319	0.0202514	0.0456876	CDS	0
SEM1	ENST00000248566	ENST00000248566_3_uoORF_1	7-:96709704-96709818	uoORF	GTG	0.004545	0.0103635	0.120385	0.0897598	0.0948849	0.0972708	0.0769102	0.140629	0.130624	0.124212	0.100575	0.118094	CDS	0
SEMA6A	ENST00000343348	ENST00000343348_11_uORF_8	5-:116504972-116504982|116574184-116574249	uORF	ATG	3.12e-08	9.75504e-08	0.00904702	0.00805094	0.00824474	0.00694994	0.0272956	0.00492061	0.0123548	0.00805891	0.00807316	0.0131575	CDS	0
SEMA6A	ENST00000343348	ENST00000343348_11_uORF_5	5-:116574568-116574580	uORF	ATG	0.0019531	0.00462039	0.0417919	0.0454115	0.0315687	0.0326591	0.035312	0.0501247	0.0649266	0.0559956	0.0378578	0.0515897	CDS	0
SEMA6A	ENST00000343348	ENST00000343348_11_uORF_7	5-:116574249-116574261	uORF	ATG	0.015625	0.0335	0.01698	0.0373606	0.0184964	0.015256	0.0181529	0.00662643	0.00825201	0.00507156	0.0220232	0.00952573	CDS	0
SEMA6A	ENST00000343348	ENST00000343348_11_uORF_11	5-:116574796-116574814	uORF	GTG	0.011837	0.0258555	0.0035783	0.00505157	0.000596659	0.00248616	0.0021863	0.00938197	0.0051691	0.00750313	0.00292817	0.00606012	CDS	0
SEMA6A	ENST00000343348	ENST00000343348_11_uORF_4	5-:116574260-116574320	uORF	ATG	1.06e-07	3.25548e-07	0.0249806	0.0154704	0.0144283	0.0253701	0.0227243	0.0263089	0.0257296	0.0310546	0.0200624	0.0264543	CDS	0
SEMA6A	ENST00000343348	ENST00000343348_11_uORF_3	5-:116574364-116574397	uORF	ATG	3.68e-07	1.10506e-06	0.0955339	0.0920859	0.0363962	0.09583	0.0944084	0.0576696	0.1092	0.113589	0.0799615	0.0937168	CDS	0
SENP3	ENST00000321337	ENST00000321337_12_uORF_10	17_7561993-7562140	uORF	GTG	3.23e-08	1.00882e-07	0.112863	0.0877712	0.0559904	0.112608	0.0448591	0.322893	0.126399	0.0941313	0.0923081	0.147071	CDS	0
SENP3	ENST00000321337	ENST00000321337_12_uORF_12	17_7562166-7562199	uORF	GTG	0.00020847	0.000538211	0.0540397	0.0621302	0.0824804	0.0215517	0.110758	0.0198065	0.0640679	0.0929692	0.0550505	0.0719005	CDS	0
SENP3	ENST00000321337	ENST00000321337_12_uORF_7	17_7562135-7562213	uORF	ATT	0.0099001	0.0218102	0.246456	0.3238	0.151114	0.20528	0.117507	0.0958084	0.235237	0.0900639	0.231663	0.134654	CDS	0
SEPTIN11	ENST00000264893	ENST00000264893_11_uORF_4	4_76949757-76949844	uORF	ATG	6.46e-05	0.000172607	0.0193553	0.0147429	0.0136533	0.0172905	0.00891862	0.0211268	0.00948257	0.0230835	0.0162605	0.0156529	CDS	0
SERINC3	ENST00000342374	ENST00000342374_5_uORF_1	20-:44521993-44522038	uORF	ATG	6.69e-06	1.89085e-05	0.0969267	0.0766145	0.0698006	0.119315	0.0859951	0.164761	0.11513	0.134651	0.0906643	0.125134	CDS	0
SERPINB9	ENST00000380698	ENST00000380698_5_uORF_1	6-:2903207-2903234	uORF	ACG	1.51e-06	4.41263e-06	0.170652	0.163695	0.172432	0.147029	0.0314935	0.187569	0.124291	0.17766	0.163452	0.130253	trunc	0
SESN3	ENST00000536441	ENST00000536441_7_uORF_2	11-:95231087-95231162	uORF	GTG	5.4e-07	1.61213e-06	0.167661	0.117953	0.0773381	0.119658	0.00425532	0.549669	0.100391	0.365854	0.120653	0.255042	trunc	0
SET	ENST00000372692	ENST00000372692_8_uORF_1	9_128683849-128683891	uORF	ACG	0.00029932	0.000762144	0.00750669	0.00157747	0.00287832	0.00382571	0.00196657	0.00695155	0.00472816	0.00534934	0.00394705	0.0047489	CDS	0
SF3A2	ENST00000221494	ENST00000221494_10_uORF_1	19_2243393-2243408	uORF	CTG	0.0016	0.0038159	0.0263061	0.00993266	0.0255967	0.0228877	0.00359066	0.0267968	0.0287517	0.0212978	0.0211808	0.0201092	CDS	0
SF3B3	ENST00000302516	ENST00000302516_10_uORF_3	16_70523834-70523873	uORF	ATG	7.2e-07	2.13536e-06	0.0535591	0.0380367	0.0330091	0.03995	0.0548956	0.0529424	0.0492348	0.0470904	0.0411387	0.0510408	CDS	0
SF3B5	ENST00000367569	ENST00000367569_4_uoORF_1	6-:144095493-144095544	uoORF	TTG	7.75e-06	2.18265e-05	0.0484083	0.0348219	0.0278738	0.029738	0.0344772	0.0633317	0.0437597	0.0554391	0.0352105	0.0492519	CDS	0
SGPL1	ENST00000373202	ENST00000373202_8_uORF_1	10_70816050-70816122	uORF	CTG	2.38e-05	6.5137e-05	0.0593716	0.0347247	0.0180305	0.0285714	0.0148368	0.0924631	0.0292141	0.0281162	0.0351746	0.0411575	CDS	0
SGSM3	ENST00000248929	ENST00000248929_14_uORF_7	22_40370672-40370688|40400695-40400757	uORF	GTG	3.99e-06	1.14161e-05	0.52968	0.725231	0.363318	0.491071	0.179872	0.371429	0.766423	0.196126	0.527325	0.378462	trunc	0
SH3BP4	ENST00000392011	ENST00000392011_7_uORF_1	2_234995350-234995376|235034870-235034919	uORF	ATG	0.0021987	0.00516676	0.0697132	0.106401	0.0230888	0.0946746	0.0382596	0.042205	0.0477848	0.0449944	0.0734694	0.0433109	CDS	0
SHC1	ENST00000448116	ENST00000448116_7_uORF_2	1-:154970693-154970720	uORF	ATG	8.04e-06	2.2628e-05	0.201384	0.191897	0.0987383	0.157927	0.110816	0.173516	0.192336	0.105464	0.162487	0.145533	CDS	0
SHISA3	ENST00000319234	ENST00000319234_5_uORF_1	4_42397647-42397761	uORF	TTG	0.00087327	0.0021377	0.994413	0.548872	0.447205	2.31707	1	0.0909091	3.09091	1	1.07689	1.29545	trunc	0
SKIL	ENST00000259119	ENST00000259119_9_uORF_3	3_170360290-170360317	uORF	ATG	0.00015242	0.000397712	0.0439994	0.051244	0.0160973	0.0367557	0.0288316	0.0175771	0.0475338	0.0328235	0.0370241	0.0316915	CDS	0
SKIL	ENST00000259119	ENST00000259119_9_uORF_2	3_170359714-170359732	uORF	ATG	0.0041152	0.00941724	0.0484234	0.0602435	0.0571393	0.0374908	0.0273141	0.0712547	0.0609792	0.0640535	0.0508243	0.0559004	CDS	0
SLC18B1	ENST00000275227	ENST00000275227_9_uORF_4	6-:132798556-132798574	uORF	ATG	4.02e-06	1.14941e-05	0.33692	0.160679	0.225316	0.162651	0.0670996	0.206107	0.321637	0.248634	0.221391	0.210869	trunc	0
SLC20A1	ENST00000272542	ENST00000272542_8_uORF_5	2_112646563-112646617	uORF	ATG	0.00057919	0.00143972	0.052902	0.059146	0.0153846	0.0389105	0.0163416	0.0711207	0.0517349	0.0758377	0.0415858	0.0537587	CDS	0
SLC20A1	ENST00000272542	ENST00000272542_8_uORF_3	2_112645944-112645989	uORF	ATG	1.28e-11	4.3318e-11	0.205899	0.101269	0.155128	0.177043	0.0991038	0.243534	0.0839393	0.175485	0.159835	0.150516	CDS	0
SLC20A1	ENST00000272542	ENST00000272542_8_uORF_2	2_112646592-112646670	uORF	ATG	7.26e-13	2.50558e-12	0.267364	0.190133	0.169872	0.172503	0.195045	0.20546	0.242676	0.330688	0.199968	0.243467	CDS	0
SLC20A2	ENST00000520262	ENST00000520262_6_uORF_1	8-:42472540-42472615	uORF	ATG	2.37e-10	7.83411e-10	0.230269	0.190678	0.0815789	0.0822622	0.144928	0.174242	0.161695	0.226923	0.146197	0.176947	trunc	0
SLC25A3	ENST00000188376	ENST00000188376_9_uORF_9	12_98593856-98593952	uORF	GTG	0.00017375	0.000451038	0.00605928	0.00480769	0.00314305	0.00514892	0.0010015	0.00851373	0.00645304	0.00928928	0.00478973	0.00631439	CDS	0
SLC25A40	ENST00000341119	ENST00000341119_10_uORF_1	7-:87858731-87858751|87860571-87860640|87876095-87876195	uORF	ATG	6.57e-05	0.000175482	0.564725	0.679117	0.536424	0.873469	0.433071	0.618705	0.460648	0.739726	0.663434	0.563038	CDS	0
SLC25A44	ENST00000423538	ENST00000423538_6_uoORF_3	1_156194133-156194247|156199834-156200131	uoORF	ATG	1.58e-08	4.99444e-08	0.398305	0.285437	0.508475	0.467811	0.593176	0.450122	0.432432	0.417062	0.415007	0.473198	trunc	0
SLC25A44	ENST00000423538	ENST00000423538_6_uORF_2	1_156194123-156194192	uORF	ATG	0.00032135	0.000815968	0.522599	0.297087	0.322034	0.48927	0.587927	0.576642	0.829889	0.35545	0.407748	0.587477	trunc	0
SLC25A5	ENST00000317881	ENST00000317881_9_uoORF_1	X_119468498-119468519	uoORF	CTG	0.00024414	0.00062649	0.02548	0.0149928	0.0220107	0.0172786	0.0120137	0.0719785	0.0336241	0.0440009	0.0199405	0.0404043	CDS	0
SLC25A6	ENST00000381401	ENST00000381401_11_PAR_Y_uoORF_1	Y-:1392005-1392077	uoORF	ACG	1.56e-06	4.55511e-06	0.0480491	0.0199985	0.0320961	0.0248514	0.00691955	0.0839125	0.036387	0.0646696	0.0312488	0.0479722	trunc	0
SLC25A6	ENST00000381401	ENST00000381401_11_uoORF_1	X-:1392005-1392077	uoORF	ACG	1.56e-06	4.55511e-06	0.0480491	0.0199985	0.0320961	0.0248514	0.00691955	0.0839125	0.036387	0.0646696	0.0312488	0.0479722	trunc	0
SLC2A3	ENST00000075120	ENST00000075120_12_uORF_4	12-:7936124-7936175	uORF	ATG	2.03e-08	6.39344e-08	0.0684127	0.0620946	0.0542731	0.0636048	0.0478227	0.0631997	0.0755817	0.0597556	0.0620963	0.0615899	CDS	0
SLC30A9	ENST00000264451	ENST00000264451_12_uoORF_3	4_41990577-41990760|42001615-42001630	uoORF	ATG	0.00095418	0.0023307	0.190615	0.118504	0.111053	0.141394	0.177497	0.19402	0.124156	0.250237	0.140391	0.186478	CDS	0
SLC35A5	ENST00000492406	ENST00000492406_6_uORF_1	3_112562119-112562236	uORF	ATA	0	0	0.434031	0.309741	0.389474	0.527851	0.373924	0.647497	0.433292	0.471014	0.415274	0.481432	CDS	0
SLC35B4	ENST00000378509	ENST00000378509_9_uORF_2	7-:134316805-134316850	uORF	ATG	1.98e-05	5.44491e-05	0.714184	0.388578	0.332288	0.294606	0.270677	0.433875	0.319759	0.214076	0.432414	0.309597	trunc	0
SLC35C1	ENST00000314134	ENST00000314134_4_uORF_1	11_45805361-45805604	uORF	ATG	5.71e-11	1.90835e-10	1.25301	0.881857	0.657277	0.58216	0.745283	2.15625	0.64135	1.89552	0.843576	1.3596	trunc	0
SLC35C2	ENST00000372227	ENST00000372227_5_uORF_0	20-:46358686-46358725	uORF	ATG	2.28e-08	7.16386e-08	1.17269	1.11869	0.454	0.708709	0.700389	1.57613	1.77372	1.95349	0.863523	1.50093	CDS	0
SLC35F1	ENST00000360388	ENST00000360388_9_uORF_1	6_117907677-117907698	uORF	ATG	0.021752	0.0459036	0.95045	1	0.585492	0.375723	0.449275	0.980392	0.375566	0.492754	0.727916	0.574497	trunc	0
SLC37A1	ENST00000352133	ENST00000352133_3_uORF_1	21_42518288-42518408	uORF	CTG	0.0015857	0.00379167	0.25996	0.262411	0.246628	0.165548	0.0697674	0.368902	0.216547	0.334471	0.233637	0.247422	CDS	0
SLC37A4	ENST00000545985	ENST00000545985_5_uoORF_1	11-:119029332-119029530	uoORF	ATG	0	0	0.283918	0.326063	0.122329	0.154564	0.169034	0.521127	0.292558	0.29007	0.221719	0.318197	CDS	0
SLC38A2	ENST00000256689	ENST00000256689_10_uORF_5	12-:46372525-46372678	uORF	ACG	6.13e-05	0.000164089	0.0734437	0.0450016	0.0549596	0.0399601	0.0449266	0.104247	0.0481651	0.054436	0.0533412	0.0629436	CDS	0
SLC38A2	ENST00000256689	ENST00000256689_10_uORF_7	12-:46372679-46372712	uORF	ACG	2.76e-05	7.52907e-05	0.0514667	0.0208603	0.0130001	0.0184005	0.0102022	0.114904	0.0211853	0.0405374	0.0259319	0.0467072	CDS	0
SLC39A3	ENST00000269740	ENST00000269740_9_uORF_1	19-:2737331-2737364	uORF	ATG	3.68e-07	1.10506e-06	0.497291	0.434118	0.400742	0.611675	0.159744	0.5	0.828199	0.397129	0.485956	0.471268	trunc	0
SLC39A6	ENST00000269187	ENST00000269187_10_uORF_2	18-:36129220-36129250	uORF	ATG	2e-06	5.81149e-06	0.186087	0.143338	0.1	0.13589	0.0501672	0.342058	0.0822089	0.154484	0.141329	0.157229	trunc	0
SLC39A7	ENST00000374677	ENST00000374677_8_uORF_4	6_33201005-33201149	uORF	ACG	0.0065756	0.0147593	0.0370948	0.0185634	0.0188453	0.0103393	0.0391687	0.0112073	0.0307927	0.0246425	0.0212107	0.0264528	trunc	0
SLC39A7	ENST00000374677	ENST00000374677_8_uORF_2	6_33200965-33201028	uORF	ATC	6.66e-07	1.97821e-06	0.0839568	0.100484	0.0344002	0.0691941	0.0690115	0.116913	0.0885565	0.0672346	0.0720088	0.0854288	trunc	0
SLC39A7	ENST00000374677	ENST00000374677_8_uoORF_6	6_33201195-33201246	uoORF	ATA	0.016273	0.0348077	0.0244181	0.0137207	0.0170506	0.0174973	0.00959233	0.00305655	0.0207469	0.0124734	0.0181717	0.0114673	trunc	0
SLC39A9	ENST00000336643	ENST00000336643_10_uORF_3	14_69398713-69398821	uORF	ATG	0.00025413	0.00065144	0.37931	0.235568	0.436697	0.298182	0.513064	0.593258	0.336207	0.4175	0.337439	0.465007	CDS	0
SLC44A1	ENST00000470972	ENST00000470972_5_uORF_2	9_105244682-105244721	uORF	ATG	0.003087	0.00715431	0.111854	0.0409812	0.0685981	0.0487896	0.0264901	0.0999219	0.0734122	0.123509	0.0675556	0.0808334	CDS	0
SLC44A1	ENST00000470972	ENST00000470972_5_uORF_3	9_105244803-105244827	uORF	ATG	0.00029104	0.000741448	0.0424821	0.0219336	0.033633	0.0167598	0.0590006	0.0616706	0.0210094	0.0689949	0.0287021	0.0526689	CDS	0
SLC52A2	ENST00000533662	ENST00000533662_2_uORF_2	8_144359233-144359293	uORF	GTG	0.00061729	0.00153014	0.0744956	0.0643026	0.107374	0.1	0.0569492	0.0151057	0.0545674	0.0491132	0.086543	0.0439339	CDS	0
SLC52A3	ENST00000488495	ENST00000488495_3_uORF_3	20-:768447-768471	uORF	ATG	0.00025528	0.00065393	0.229054	0.382812	0.173596	0.106586	0.0639175	0.206831	0.299812	0.249035	0.223012	0.204899	CDS	0
SLC5A6	ENST00000310574	ENST00000310574_8_uORF_2	2-:27211485-27211521	uORF	ATG	2.06e-05	5.66012e-05	0.243488	0.177952	0.0981329	0.172338	0.214314	0.19742	0.290598	0.210896	0.172978	0.228307	trunc	0
SLC6A8	ENST00000253122	ENST00000253122_10_uORF_2	X_153688341-153688389	uORF	ATG	1.24e-11	4.19837e-11	0.609182	0.674169	0.707087	0.986364	1.45578	0.881279	1.40553	1.51269	0.7442	1.31382	trunc	0
SLC7A1	ENST00000380752	ENST00000380752_10_uORF_2	13-:29536196-29536202|29553760-29553826	uORF	ATC	0.0052526	0.011902	0.0388883	0.0285762	0.0125253	0.0144243	0.0172979	0.0029703	0.0301897	0.0349206	0.0236035	0.0213446	CDS	0
SLC9A1	ENST00000263980	ENST00000263980_8_uORF_1	1-:27154455-27154527	uORF	TTG	0.0046468	0.01058	0.158545	0.192389	0.174451	0.223881	0.177469	0.144366	0.154732	0.234727	0.187316	0.177824	trunc	0
SMAD4	ENST00000342988	ENST00000342988_8_uORF_2	18_51046933-51047023	uORF	ATG	7.62e-06	2.14687e-05	0.136747	0.181011	0.0855519	0.117546	0.0552783	0.0901681	0.109641	0.0497886	0.130214	0.076219	CDS	0
SMAD4	ENST00000342988	ENST00000342988_8_uORF_8	18_51030219-51030390	uORF	GTG	0.0074751	0.0166977	0.0458638	0.0062928	0.0197427	0.0179743	0.0472169	0.0585838	0.0254126	0.0399248	0.0224684	0.0427845	CDS	0
SMARCA5	ENST00000283131	ENST00000283131_4_uORF_2	4_143513705-143513846	uORF	GTG	0.0055203	0.0124796	0.0258592	0.0155476	0.0295309	0.0153005	0.0169112	0.0350486	0.0224765	0.0352402	0.0215596	0.0274191	trunc	0
SMARCE1	ENST00000348513	ENST00000348513_12_uORF_6	17-:40645811-40645823	uORF	CTG	0.0060105	0.0135303	0.0306234	0.0157257	0.0198777	0.0349537	0.0298708	0.032341	0.0550887	0.0603222	0.0252951	0.0444057	trunc	0
SMCO4	ENST00000525141	ENST00000525141_1_uORF_1	11-:93479194-93479257	uORF	TTG	8.03e-05	0.000213388	0.444304	0.19818	0.272537	0.24283	0.102041	0.32696	0.259116	0.456973	0.289463	0.286272	CDS	0
SMCR8	ENST00000406438	ENST00000406438_5_uORF_1	17_18315305-18315323	uORF	ATG	0.0041152	0.00941724	0.133544	0.135961	0.0423497	0.0389171	0.138889	0.12704	0.116854	0.110211	0.0876929	0.123248	trunc	0
SMIM15	ENST00000339020	ENST00000339020_8_uORF_1	5-:61161109-61161196	uORF	ATG	9.58e-08	2.94716e-07	0.634409	0.610044	0.438914	0.8352	0.378102	0.708561	0.647727	0.59589	0.629642	0.58257	CDS	0
SMIM15	ENST00000339020	ENST00000339020_8_uORF_3	5-:61162217-61162247	uORF	GTG	0.0013428	0.00322958	0.12957	0.0568685	0.0754148	0.1456	0.0160584	0.256831	0.0614669	0.139269	0.101863	0.118406	CDS	0
SMIM15	ENST00000339020	ENST00000339020_8_uORF_2	5-:61162249-61162396	uORF	GTG	0.00027886	0.000712091	0.243011	0.128508	0.190045	0.1664	0.0715328	0.663024	0.173037	0.424658	0.181991	0.333063	CDS	0
SMIM26	ENST00000411646	ENST00000411646_2_uoORF_4	20_18567467-18567596|18569235-18569238	uoORF	CTG	0.0053843	0.01219	0.201647	0.203745	0.249166	0.202445	0.136578	0.207729	0.244142	0.192308	0.214251	0.195189	CDS	0
SMIM27	ENST00000453396	ENST00000453396_5_uORF_1	9_32552341-32552386	uORF	ATG	0.00023555	0.000605721	0.569106	0.554545	0.869565	0.854839	0.121094	1.90683	0.721382	1.34868	0.712014	1.0245	CDS	0
SMIM30	ENST00000397764	ENST00000397764_8_uoORF_1	7-:113117574-113117589	uoORF	ATT	0.0081	0.017977	0.0920479	0.0710988	0.028481	0.0837538	0.0308151	0.124679	0.10443	0.0905861	0.0688454	0.0876276	CDS	0
SMS	ENST00000404933	ENST00000404933_7_uoORF_1	X_21940801-21940873|21967195-21967216	uoORF	ATG	5.03e-06	1.43176e-05	0.450892	0.21292	0.321925	0.258735	0.13259	0.532078	0.195416	0.42079	0.311118	0.320218	trunc	0
SNRPD1	ENST00000300413	ENST00000300413_10_uoORF_1	18_21612358-21612433	uoORF	CTG	0.0018121	0.00430561	0.222309	0.111604	0.160985	0.195109	0.0590904	0.251931	0.151206	0.226103	0.172502	0.172083	trunc	0
SNRPF	ENST00000266735	ENST00000266735_9_uORF_3	12_95858991-95859009	uORF	CTG	0.023078	0.0485445	0.0644458	0.0152872	0.0383936	0.0237284	0.185727	0.0725689	0.048255	0.0751353	0.0354637	0.0954216	CDS	0
SNRPN	ENST00000577565	ENST00000577565_1_uORF_14	15_24974346-24974397	uORF	ATT	4.22e-05	0.00011393	0.0223635	0.0181818	0.0138083	0.0107501	0.0338477	0.00754762	0.0148589	0.0152005	0.0162759	0.0178637	trunc	0
SNRPN	ENST00000577565	ENST00000577565_1_uORF_6	15_24962126-24962209|24967931-24968037	uORF	CTG	1.81e-16	9.17913e-16	1.06437	1.16356	0.914365	1.12286	1.20918	0.904636	1.32497	1.30838	1.06629	1.18679	trunc	0
SNX19	ENST00000265909	ENST00000265909_9_uORF_1	11-:130916312-130916369	uORF	ATG	4.41e-09	1.41324e-08	0.155707	0.0758377	0.0754936	0.0751708	0.0299572	0.158479	0.0892077	0.0666667	0.0955523	0.0860776	trunc	0
SNX33	ENST00000308527	ENST00000308527_6_uORF_1	15_75648827-75648929	uORF	CTG	5.18e-06	1.47345e-05	0.182698	0.138393	0.0850202	0.126911	0.103896	0.0462555	0.120758	0.218673	0.133256	0.122396	trunc	0
SNX5	ENST00000377768	ENST00000377768_7_uoORF_7	20-:17957033-17957037|17968374-17968457|17968699-17968801	uoORF	ACG	0.0016138	0.00384818	0.0315451	0.029066	0.0094871	0.0251515	0.0310138	0.0794466	0.0311136	0.0667055	0.0238124	0.0520699	CDS	0
SOX12	ENST00000342665	ENST00000342665_5_uORF_1	20_325669-325732	uORF	ATG	3.89e-08	1.21276e-07	0.442718	0.584715	0.288817	0.375558	0.202475	0.417978	0.615385	0.539379	0.422952	0.443804	CDS	0
SOX4	ENST00000244745	ENST00000244745_4_uORF_2	6_21594062-21594077	uORF	ATG	0.0021085	0.00496236	0.0773072	0.0951737	0.0854371	0.116467	0.113256	0.0231075	0.0832329	0.0372174	0.0935963	0.0642034	trunc	0
SOX4	ENST00000244745	ENST00000244745_4_uORF_1	6_21593844-21594057	uORF	CTG	0	0	0.441062	0.511051	0.277367	0.395584	0.417584	0.497909	0.384327	0.291356	0.406266	0.397794	trunc	0
SP3	ENST00000310015	ENST00000310015_12_uORF_4	2-:173965188-173965218	uORF	ATG	0.019581	0.0415647	0.0532842	0.0402045	0.0391321	0.0655861	0.0383104	0.0730479	0.0187406	0.0317204	0.0495517	0.0404548	trunc	0
SPATC1L	ENST00000291672	ENST00000291672_6_uORF_2	21-:46184392-46184422	uORF	ATG	7.88e-05	0.000209478	0.140168	0.234544	0.116195	0.0987991	0.206034	0.270057	0.237518	0.126156	0.147426	0.209941	trunc	0
SPATC1L	ENST00000291672	ENST00000291672_6_uORF_3	21-:46184418-46184433	uORF	ATG	0.006347	0.014255	0.0347222	0.0809617	0.0392157	0.0600437	0.178448	0.0580229	0.0660895	0.0277411	0.0537358	0.0825754	trunc	0
SPG21	ENST00000204566	ENST00000204566_7_uORF_3	15-:64989698-64989800	uORF	CTG	0.017369	0.0370681	0.158812	0.0519603	0.128255	0.110678	0.0631383	0.481224	0.125792	0.248939	0.112426	0.229773	CDS	0
SPIN1	ENST00000375859	ENST00000375859_4_uORF_4	9_88426477-88426504	uORF	TTG	0.00062704	0.00155352	0.0952819	0.112442	0.0758621	0.09375	0.0497193	0.0237982	0.124132	0.0412574	0.0943339	0.0597267	CDS	0
SPIN1	ENST00000375859	ENST00000375859_4_uoORF_3	9_88426529-88426586	uoORF	ATA	0.014807	0.0319591	0.104028	0.143047	0.110972	0.102971	0.0505213	0.108996	0.119858	0.145383	0.115254	0.106189	CDS	0
SPIN1	ENST00000375859	ENST00000375859_4_uORF_2	9_88388491-88388538|88426381-88426466	uORF	ACG	0.0028197	0.00656235	0.16939	0.101131	0.115361	0.106045	0.0244587	0.26654	0.130009	0.101506	0.122982	0.130628	CDS	0
SPIN4	ENST00000374884	ENST00000374884_3_uORF_2	X-:63351160-63351241	uORF	ATC	0.0015295	0.00366117	0.168607	0.069466	0.0340173	0.0698885	0.0265823	0.156687	0.0519961	0.0920245	0.0854946	0.0818224	CDS	0
SPINT2	ENST00000301244	ENST00000301244_12_uORF_2	19_38264717-38264885	uORF	CTG	2.3e-11	7.75323e-11	0.128613	0.0476323	0.118376	0.110716	0.0393098	0.112099	0.0987574	0.133451	0.101334	0.0959043	trunc	0
SPRY4	ENST00000344120	ENST00000344120_4_uORF_1	5-:142324860-142324890	uORF	ATT	0.0019531	0.00462039	0.100239	0.061991	0.0422125	0.0511228	0.0361446	0.132603	0.0888058	0.0697518	0.0638912	0.0818262	trunc	0
SREBF2	ENST00000361204	ENST00000361204_9_uORF_2	22_41833193-41833232	uORF	ATG	0.0003206	0.000814205	0.0166086	0.00792636	0.0071066	0.0142051	0.00491146	0.0141543	0.00476445	0.0120451	0.0114617	0.00896883	CDS	0
SREBF2	ENST00000361204	ENST00000361204_9_uORF_1	22_41833136-41833163	uORF	ATG	0.0025911	0.00604762	0.0592359	0.0519049	0.106045	0.0473828	0.0430399	0.133404	0.0477781	0.0741727	0.0661422	0.0745987	CDS	0
SRF	ENST00000265354	ENST00000265354_6_uORF_1	6_43171590-43171626	uORF	ATG	0.00015984	0.000416258	0.180228	0.0626831	0.064455	0.115258	0.0629291	0.189474	0.112183	0.204348	0.105656	0.142233	CDS	0
SRGAP2	ENST00000573034	ENST00000573034_8_uORF_1	1_206205593-206205668	uORF	CTG	7.78e-10	2.54215e-09	0.922989	0.607697	0.750174	0.725671	0.585714	0.695346	0.48989	1.21677	0.751633	0.74693	trunc	0
SRGAP2C	ENST00000367123	ENST00000367123_8_uORF_2	1_121187265-121187280	uORF	ATG	0.0021085	0.00496236	0.0397614	0.0731034	0.0750809	0.0583726	0.210112	0.0172144	0.0428249	0.0640794	0.0615796	0.0835578	CDS	0
SRGAP2C	ENST00000367123	ENST00000367123_8_uORF_1	1_121187069-121187144	uORF	CTG	7.78e-10	2.54215e-09	0.798211	0.486437	0.697735	0.510024	0.506742	0.771518	0.424743	1.07401	0.623101	0.694253	CDS	0
SRSF2	ENST00000392485	ENST00000392485_2_uoORF_3	17-:76737156-76737240	uoORF	CTG	0.0022154	0.00520183	0.0372651	0.0278903	0.0336718	0.042328	0.0236277	0.0518115	0.0289928	0.0354281	0.0352888	0.034965	CDS	0
SRSF2	ENST00000392485	ENST00000392485_2_uORF_2	17-:76737236-76737257	uORF	ACG	0.0020752	0.00489264	0.0449505	0.0281435	0.0407012	0.0318459	0.0224738	0.0991657	0.0352862	0.0524512	0.0364102	0.0523442	CDS	0
SRSF5	ENST00000394366	ENST00000394366_6_uORF_6	14_69767211-69767259	uORF	ACG	0.0021952	0.00515895	0.0692458	0.0297552	0.049819	0.0576416	0.00916936	0.0623097	0.0206234	0.051848	0.0516154	0.0359876	trunc	0
SSB	ENST00000260956	ENST00000260956_9_uORF_5	2_169798876-169798939	uORF	TTG	0.0057187	0.0129102	0.00957873	0.0037914	0.00200243	0.0054479	0.00655456	0.0124131	0.00460262	0.00544707	0.00520512	0.00725433	CDS	0
SSBP1	ENST00000612337	ENST00000612337_4_uORF_1	7_141739136-141739148	uORF	ATT	0.0019531	0.00462039	0.090031	0.0636735	0.0534408	0.0740674	0.0854013	0.062201	0.112676	0.0627966	0.0703032	0.0807687	CDS	0
ST3GAL4	ENST00000530591	ENST00000530591_5_uORF_1	11_126406114-126406150	uORF	ATG	1.54e-07	4.69421e-07	2.68571	1.66138	1.92683	1.95122	0.609929	0.726316	1.44488	6.09524	2.05628	2.21909	trunc	0
ST6GAL1	ENST00000677292	ENST00000677292_1_uORF_3	3_187038741-187038813	uORF	ATG	0.011269	0.0246608	0.0627391	0.0726297	0.0539586	0.0624613	0.053787	0.0663507	0.0958011	0.0510949	0.0629472	0.0667584	CDS	0
STAT6	ENST00000553533	ENST00000553533_2_uoORF_4	12-:57108183-57108299|57111128-57111330	uoORF	ACG	0.00029859	0.000760418	0.092441	0.0771679	0.127053	0.0633947	0.127371	0.140329	0.136158	0.071116	0.0900141	0.118744	trunc	0
STAU2	ENST00000524300	ENST00000524300_6_uORF_6	8-:73738302-73738338	uORF	GTG	0.0088232	0.0195126	0.0706619	0.026259	0.0492183	0.0592556	0.0213415	0.00104822	0.0387263	0.00681818	0.0513487	0.0169835	trunc	0
STC2	ENST00000265087	ENST00000265087_9_uORF_1	5-:173328349-173328385	uORF	ATG	0.00044034	0.00110631	0.0678802	0.029051	0.022293	0.0211225	0.0289296	0.118552	0.0348078	0.0584958	0.0350867	0.0601963	CDS	0
STON2	ENST00000649389	ENST00000649389_1_uoORF_4	14-:81398378-81398408	uoORF	GTG	0.0013428	0.00322958	0.144304	0.083004	0.100346	0.124864	0.0323102	0.00178891	0.104235	0.0821326	0.11313	0.0551165	trunc	0
STON2	ENST00000649389	ENST00000649389_1_uORF_3	14-:81398540-81398580|81427101-81427175	uORF	ATG	4.96e-07	1.48349e-06	0.144304	0.151779	0.0519031	0.112921	0.113086	0.0966011	0.186133	0.170029	0.115227	0.141462	trunc	0
STRADB	ENST00000194530	ENST00000194530_8_uORF_1	2_201454800-201454836	uORF	ATG	0.0011883	0.00287214	0.571134	0.858586	0.157377	0.286885	0.088	0.0780142	0.442177	0.261261	0.468496	0.217363	trunc	0
STRBP	ENST00000348403	ENST00000348403_10_uoORF_1	9-:123179226-123179227|123184131-123184229	uoORF	ATG	3.44e-05	9.34229e-05	0.061592	0.0396154	0.0317869	0.063957	0.0324357	0.0562404	0.0543446	0.0712329	0.0492378	0.0535634	trunc	0
STRBP	ENST00000348403	ENST00000348403_10_uORF_4	9-:123236921-123236951	uORF	ATG	0.00043303	0.00108888	0.0452482	0.00596154	0.0337915	0.0260012	0.00550796	0.0181048	0.00974385	0.00821918	0.0277506	0.0103939	trunc	0
STRN3	ENST00000357479	ENST00000357479_10_uORF_3	14-:31026330-31026360	uORF	ATG	0.0009653	0.00235727	0.108673	0.0398717	0.0467654	0.0945559	0.0124294	0.17551	0.0516093	0.0654952	0.0724666	0.076261	trunc	0
STT3A	ENST00000529196	ENST00000529196_5_uORF_3	11_125592875-125592905	uORF	ATG	0.00010681	0.000281359	0.0516774	0.0210853	0.0267943	0.0373144	0.0278664	0.0605536	0.0237803	0.026797	0.0342178	0.0347493	trunc	0
STX16	ENST00000361830	ENST00000361830_7_uORF_1	20_58651292-58651319	uORF	ATG	0.0074822	0.0167021	0.240415	0.238231	0.345833	0.223975	0.089404	0.456026	0.27086	0.365672	0.262114	0.29549	CDS	0
STX6	ENST00000542060	ENST00000542060_5_uORF_2	1-:181022642-181022714	uORF	CTG	0.015886	0.0340371	0.342013	0.158377	0.126819	0.146341	0.0316206	0.389474	0.164062	0.209906	0.193388	0.198766	CDS	0
STYX	ENST00000354586	ENST00000354586_5_uORF_1	14_52730245-52730341	uORF	ATG	9.9e-13	3.40827e-12	0.205791	0.126301	0.180488	0.266667	0.127346	0.397399	0.243088	0.326889	0.194812	0.273681	CDS	0
SUB1	ENST00000265073	ENST00000265073_9_uORF_2	5_32585597-32585612	uORF	GTG	0.0081	0.017977	0.057946	0.0312081	0.0443525	0.0465695	0.0994182	0.0657378	0.105273	0.134061	0.045019	0.101122	trunc	0
SUCO	ENST00000263688	ENST00000263688_4_uoORF_2	1_172533364-172533439	uoORF	ATC	6.35e-06	1.79753e-05	0.163832	0.0512334	0.151811	0.20813	0.147103	0.137177	0.117775	0.186047	0.143751	0.147025	trunc	0
SUMO2	ENST00000420826	ENST00000420826_7_uORF_3	17-:75182865-75182883	uORF	CTG	0.0054766	0.0123856	0.440206	0.244895	0.29543	0.254722	0.235112	0.291988	0.210472	0.205419	0.308813	0.235748	trunc	0
SUPT5H	ENST00000359191	ENST00000359191_10_uORF_5	19_39445716-39445785	uORF	ATG	5.09e-05	0.000136938	0.00658639	0.0236486	0.00296195	0.00727529	0.0183346	0.0244296	0.0217922	0.0202703	0.0101181	0.0212067	CDS	0
SYMPK	ENST00000245934	ENST00000245934_12_uORF_6	19-:45863090-45863135	uORF	ATG	6.11e-07	1.81853e-06	0.0452978	0.0339949	0.0291854	0.0175077	0.0146796	0.0394205	0.0369236	0.0266602	0.0314965	0.029421	CDS	0
TAB2	ENST00000637181	ENST00000637181_2_uORF_2	6_149317906-149318015|149369908-149369955	uORF	CTG	2.28e-10	7.54001e-10	0.124555	0.0852713	0.104329	0.151972	0.146552	0.465619	0.15668	0.22813	0.116532	0.249245	CDS	0
TAOK1	ENST00000261716	ENST00000261716_8_uORF_3	17_29390737-29390779	uORF	ACG	0.00035214	0.000891599	0.107171	0.0446058	0.0872328	0.0439239	0.0549961	0.14146	0.0250052	0.088189	0.0707334	0.0774125	trunc	0
TAPBP	ENST00000426633	ENST00000426633_6_uORF_5	6-:33314090-33314114	uORF	ATG	0.0030679	0.00711286	0.227085	0.188816	0.148485	0.100803	0.148148	0.171429	0.223562	0.142857	0.166297	0.171499	CDS	0
TARDBP	ENST00000240185	ENST00000240185_8_uORF_2	1_11012707-11012740	uORF	GTG	0.019728	0.0418555	0.0386061	0.011806	0.0427861	0.0435199	0.00020829	0.0374372	0.0230392	0.0186178	0.0341795	0.0198256	trunc	0
TARS1	ENST00000265112	ENST00000265112_8_uORF_1	5_33441027-33441045	uORF	TTG	0.0041645	0.00952485	0.0375278	0.0134675	0.017151	0.0179601	0.00288398	0.0367048	0.0158757	0.0417572	0.0215266	0.0243054	CDS	0
TATDN2	ENST00000448281	ENST00000448281_7_uoORF_2	3_10248993-10249067|10249194-10249366	uoORF	TTG	7.87e-10	2.57098e-09	0.332176	0.226786	0.212121	0.188172	0.602837	0.729064	0.329356	0.722892	0.239814	0.596037	trunc	0
TBC1D4	ENST00000377636	ENST00000377636_8_uORF_1	13-:75482007-75482019	uORF	ATG	0.015625	0.0335	0.0987135	0.0759448	0.0528069	0.0550459	0.0210632	0.0344828	0.0551302	0.0176678	0.0706277	0.032086	CDS	0
TBC1D5	ENST00000446818	ENST00000446818_6_uoORF_3	3-:17508512-17508605|17623848-17623884	uoORF	ATG	0.012041	0.0262815	0.194545	0.411168	0.0335196	0.202808	0.143322	0.0512129	0.104051	0.0934256	0.21051	0.098003	trunc	0
TBL1X	ENST00000645353	ENST00000645353_2_uORF_1	X_9501816-9501846	uORF	ATG	0.00022783	0.000586538	0.381526	0.318374	0.247423	0.464368	0.119114	0.406417	0.247423	0.215569	0.352923	0.247131	trunc	0
TBRG4	ENST00000258770	ENST00000258770_8_uoORF_3	7-:45109218-45109287|45111642-45111669	uoORF	ATG	4.34e-06	1.23933e-05	0.0380702	0.0220025	0.0489322	0.0236002	0.0299917	0.0914404	0.0367339	0.0486202	0.0331513	0.0516966	CDS	0
TCF12	ENST00000333725	ENST00000333725_10_uORF_1	15_56918681-56918693	uORF	ATG	0.015625	0.0335	0.0289064	0.0342526	0.0180439	0.046956	0.027618	0.0300578	0.0638091	0.0598185	0.0320397	0.0453258	CDS	0
TCF7L1	ENST00000282111	ENST00000282111_4_uORF_1	2_85133550-85133646	uORF	ACG	6.44e-06	1.82213e-05	0.124272	0.104985	0.105403	0.135227	0.160842	0.15768	0.161466	0.136771	0.117472	0.15419	CDS	0
TCN2	ENST00000215838	ENST00000215838_8_uORF_2	22_30607198-30607210	uORF	ATG	0.0060105	0.0135303	0.142605	0.0923131	0.0476615	0.0913659	0.0564759	0.0630194	0.125117	0.0712963	0.0934864	0.0789771	CDS	0
TDGF1	ENST00000296145	ENST00000296145_6_uORF_3	3_46577884-46577917	uORF	ATG	0.0017906	0.00425556	0.155493	0.153451	0.114046	0.153724	0.180038	0.0716103	0.267994	0.128147	0.144178	0.161947	trunc	0
TDGF1	ENST00000296145	ENST00000296145_6_uORF_5	3_46577862-46577928	uORF	ATT	0.022979	0.0483675	0.0986434	0.141092	0.0983643	0.133	0.138704	0.106469	0.211332	0.131615	0.117775	0.14703	trunc	0
TDGF1P3	ENST00000602699	ENST00000602699_1_uORF_1	X_110521044-110521077	uORF	ATG	0.0017906	0.00425556	0.13196	0.118262	0.09525	0.123257	0.148681	0.0671849	0.202695	0.107964	0.117182	0.131631	CDS	0
TDGF1P3	ENST00000602699	ENST00000602699_1_uoORF_3	X_110521083-110521191	uoORF	ATT	0.00029786	0.000758625	0.110431	0.116704	0.102832	0.121347	0.144291	0.0388673	0.124699	0.0761463	0.112829	0.0960008	CDS	0
TDGF1P3	ENST00000602699	ENST00000602699_1_uORF_2	X_110521022-110521088	uORF	ATT	0.022979	0.0483675	0.0837141	0.108737	0.0821532	0.10664	0.114546	0.099889	0.15984	0.110822	0.0953112	0.121274	CDS	0
TEAD1	ENST00000527636	ENST00000527636_7_uORF_2	11_12674551-12674620	uORF	CTG	0.0081598	0.0181042	0.114578	0.0452046	0.135135	0.0619469	0.035248	0.184477	0.0314136	0.0926641	0.0892162	0.0859507	CDS	0
TENT2	ENST00000453514	ENST00000453514_6_uORF_3	5_79613044-79613074	uORF	ATG	0.00022783	0.000586538	0.318633	0.326087	0.169661	0.18593	0.0722348	0.0729412	0.105417	0.237467	0.250078	0.122015	trunc	0
TENT2	ENST00000453514	ENST00000453514_6_uoORF_2	5_79619623-79619707	uoORF	ATG	0.0072973	0.0163229	0.29989	0.381988	0.0798403	0.234506	0.207675	0.138824	0.139824	0.100264	0.249056	0.146647	trunc	0
TENT5B	ENST00000289166	ENST00000289166_6_uORF_1	1-:27012713-27012821	uORF	CTG	0.0025907	0.00604762	0.0733321	0.0293166	0.0708343	0.0354093	0.0421651	0.0813602	0.0365446	0.0638376	0.0522231	0.0559769	CDS	0
TET1	ENST00000373644	ENST00000373644_5_uORF_1	10_68560496-68560568	uORF	ATG	1.51e-13	5.26343e-13	0.326881	0.188034	0.102624	0.124495	0.101004	0.506014	0.0997982	0.291646	0.185508	0.249615	CDS	0
TFAM	ENST00000487519	ENST00000487519_6_uoORF_1	10_58385432-58385648|58386219-58386303	uoORF	ATG	1.27e-10	4.21706e-10	0.428268	0.318847	0.435419	0.334635	0.293214	0.506131	0.226882	0.305138	0.379292	0.332841	CDS	0
TFCP2	ENST00000257915	ENST00000257915_10_uoORF_4	12-:51172406-51172454	uoORF	ACG	0.019404	0.0412219	0.093462	0.0438175	0.0519685	0.0534413	0.0716981	0.0764075	0.0362107	0.0350242	0.0606723	0.0548351	trunc	0
TFCP2	ENST00000257915	ENST00000257915_10_uORF_2	12-:51172951-51173101	uORF	ATT	6.76e-07	2.00669e-06	0.212813	0.114646	0.0913386	0.0963563	0.14717	0.270777	0.114484	0.166667	0.128788	0.174775	trunc	0
TFDP2	ENST00000489671	ENST00000489671_6_uORF_4	3-:142101762-142101825	uORF	ATT	0.0028416	0.00661121	0.0570977	0.049483	0.0105116	0.0403135	0.0424448	0.000755287	0.032385	0.0401606	0.0393515	0.0289364	trunc	0
THOC5	ENST00000397872	ENST00000397872_5_uoORF_5	22-:29549107-29549158|29550727-29550817	uoORF	ATG	4.83e-09	1.54681e-08	0.164567	0.1639	0.0950389	0.0727714	0.0600567	0.121168	0.0530796	0.0472343	0.124069	0.0703846	CDS	0
THUMPD3	ENST00000515662	ENST00000515662_6_uORF_3	3_9363423-9363525	uORF	ATG	1.1e-07	3.37691e-07	0.0541339	0.034296	0.0216535	0.0251609	0.0225017	0.0141643	0.0322011	0.00871632	0.0338111	0.0193958	CDS	0
TIMM10	ENST00000525158	ENST00000525158_1_uORF_1	11-:57530190-57530214	uORF	ATC	0.016701	0.0356997	0.0523495	0.0488363	0.0252788	0.0286033	0.03931	0.0856056	0.100748	0.0674571	0.038767	0.0732802	CDS	0
TIMM21	ENST00000169551	ENST00000169551_11_uORF_3	18_74148596-74148623	uORF	ATG	0.0025911	0.00604762	0.175592	0.124579	0.0615385	0.0492958	0.142032	0.211568	0.204945	0.199108	0.102751	0.189413	CDS	0
TIMM21	ENST00000169551	ENST00000169551_11_uORF_2	18_74148540-74148558	uORF	ATG	0.0033436	0.00772515	0.405355	0.265152	0.404615	0.147887	0.26097	0.560122	0.356539	0.500743	0.305752	0.419593	CDS	0
TIMM23	ENST00000580018	ENST00000580018_4_uORF_1	10_45972561-45972588	uORF	ACG	0.0027248	0.00634905	0.0605383	0.0492033	0.0225705	0.0449892	0.026208	0.066364	0.0239812	0.0152672	0.0443253	0.0329551	CDS	0
TINF2	ENST00000267415	ENST00000267415_12_uORF_2	14-:24242404-24242488	uORF	ATG	0.0009731	0.00237572	0.204773	0.135417	0.0952381	0.232639	0.130137	0.198582	0.236934	0.243316	0.167017	0.202242	CDS	0
TLE1	ENST00000376499	ENST00000376499_8_uORF_5	9-:81689004-81689061	uORF	ATG	0.00075442	0.00185701	0.0786948	0.0423878	0.0502192	0.0611236	0.0311526	0.0432873	0.0362092	0.0808737	0.0581064	0.0478807	trunc	0
TLE1	ENST00000376499	ENST00000376499_8_uORF_4	9-:81688448-81688508	uORF	ACG	9.28e-07	2.74196e-06	0.117083	0.0890145	0.120765	0.0633708	0.0305296	0.044542	0.0956638	0.0974026	0.0975583	0.0670345	trunc	0
TLE1	ENST00000376499	ENST00000376499_8_uORF_2	9-:81689217-81689247	uORF	ATC	0.00026214	0.000670858	0.100021	0.164606	0.110004	0.0782022	0.115265	0.0972396	0.0692892	0.20307	0.113208	0.121216	trunc	0
TLN1	ENST00000314888	ENST00000314888_10_uoORF_2	9-:35725635-35725727|35732074-35732189	uoORF	AGG	8.82e-07	2.60894e-06	0.0280026	0.0185382	0.0083148	0.0263005	0.00564869	0.0373728	0.0346339	0.0151182	0.020289	0.0231934	CDS	0
TM9SF3	ENST00000371142	ENST00000371142_9_uORF_2	10-:96586864-96586930	uORF	ATG	0.0026006	0.00606883	0.0231645	0.00692562	0.0168723	0.0118972	0.00635593	0.0330198	0.00676838	0.0244353	0.0147149	0.0176449	CDS	0
TMED2	ENST00000262225	ENST00000262225_8_uoORF_3	12_123584592-123584643	uoORF	GTG	7.54e-05	0.000200658	0.0568741	0.0215692	0.0544315	0.0281215	0.0238095	0.119173	0.0390515	0.0740256	0.0402491	0.064015	CDS	0
TMEFF1	ENST00000374879	ENST00000374879_5_uORF_1	9_100473382-100473451	uORF	CTG	2.01e-07	6.10272e-07	0.440645	0.169901	0.18865	0.231785	0.0977517	0.3804	0.197145	0.375194	0.257745	0.262623	CDS	0
TMEM134	ENST00000540133	ENST00000540133_1_uORF_3	11-:67469205-67469229	uORF	ATG	0.0013428	0.00322958	0.434783	1.09483	0.666667	1.15534	0.0956522	0.971963	1.03497	0.794521	0.837904	0.724275	trunc	0
TMEM14C	ENST00000541412	ENST00000541412_5_uORF_2	6_10723190-10723217	uORF	ATT	0.00052312	0.00130566	0.156338	0.0244734	0.100548	0.0907206	0.0314435	0.192434	0.0590495	0.171698	0.0930202	0.113656	trunc	0
TMEM167A	ENST00000502346	ENST00000502346_2_uoORF_5	5-:83065086-83065117|83077320-83077385	uoORF	ATG	0.015177	0.0327215	0.282925	0.0760191	0.183084	0.194182	0.173109	0.354454	0.102967	0.282854	0.184053	0.228346	trunc	0
TMEM184C	ENST00000296582	ENST00000296582_8_uORF_1	4_147617614-147617659	uORF	CTG	6.69e-06	1.89085e-05	0.589251	0.237245	0.519126	0.355469	1.42105	1.0367	0.789044	1.32864	0.425273	1.14386	CDS	1
TMEM184C	ENST00000296582	ENST00000296582_8_uORF_2	4_147617441-147617471	uORF	ATG	3.81e-06	1.0916e-05	0.262956	0.318878	0.147541	0.275391	0.25731	0.614679	0.665501	0.258216	0.251191	0.448926	CDS	1
TMEM184C	ENST00000296582	ENST00000296582_8_uORF_3	4_147617722-147617833	uORF	AGG	3.27e-08	1.02109e-07	0.318618	0.123724	0.218579	0.160156	0.520468	0.123853	0.329837	0.422535	0.20527	0.349173	CDS	1
TMEM200A	ENST00000296978	ENST00000296978_4_uORF_1	6_130366081-130366258	uORF	GTG	1.76e-09	5.70316e-09	0.209768	0.157838	0.136161	0.0445434	0.135385	0.392226	0.120582	0.201278	0.137077	0.212368	CDS	0
TMEM208	ENST00000304800	ENST00000304800_14_uoORF_3	16_67227148-67227224|67227835-67227879	uoORF	ATG	1.78e-05	4.91337e-05	0.176859	0.132653	0.129559	0.248241	0.182258	0.223556	0.234697	0.165692	0.171828	0.201551	trunc	0
TMEM30B	ENST00000555868	ENST00000555868_2_uORF_1	14-:61281264-61281324	uORF	CTG	0.0041263	0.00944117	0.136134	0.12116	0.0652632	0.172524	0.0458515	0.131455	0.304348	0.252119	0.12377	0.183443	trunc	0
TMEM43	ENST00000306077	ENST00000306077_5_uoORF_1	3_14125080-14125205|14129411-14129487	uoORF	ACG	0.00314	0.00727023	0.0648006	0.0861823	0.0314658	0.0518784	0.0437196	0.202722	0.0858833	0.142214	0.0585818	0.118635	trunc	0
TMEM60	ENST00000257663	ENST00000257663_4_uoORF_1	7-:77794287-77794423|77798253-77798357	uoORF	CTG	7.02e-05	0.00018733	0.355918	0.231491	0.269231	0.254582	0.402632	0.58309	0.2593	0.294798	0.277806	0.384955	trunc	0
TMEM63A	ENST00000366835	ENST00000366835_8_uORF_2	1-:225879268-225879397	uORF	TTG	5.05e-08	1.56706e-07	0.856115	0.420732	0.533835	0.5	0.6	0.707965	0.424315	0.44898	0.57767	0.545315	trunc	0
TMEM64	ENST00000458549	ENST00000458549_7_uORF_1	8-:90645926-90646019	uORF	CTG	1.66e-07	5.05368e-07	0.641096	0.417107	0.5	0.498344	0.701005	0.995745	0.461704	0.465438	0.514137	0.655973	trunc	0
TMEM69	ENST00000372025	ENST00000372025_5_uORF_1	1_45688213-45688275|45690973-45691019	uORF	CTG	0.00036225	0.000916246	0.188466	0.160258	0.146257	0.215164	0.141584	0.134026	0.222707	0.132867	0.177536	0.157796	CDS	0
TMEM69	ENST00000372025	ENST00000372025_5_uORF_2	1_45688250-45688275|45690973-45690987	uORF	CTG	0.0043194	0.00986603	0.228374	0.135057	0.143355	0.123634	0.090099	0.220079	0.176419	0.167055	0.157605	0.163413	CDS	0
TMOD3	ENST00000308580	ENST00000308580_12_uORF_3	15_51862835-51862862	uORF	CTG	0.0091312	0.0201694	0.0606695	0.0274501	0.0257458	0.0182696	0.018845	0.0362694	0.021298	0.0139795	0.0330337	0.022598	trunc	0
TMOD3	ENST00000308580	ENST00000308580_12_uORF_1	15_51829774-51829804	uORF	TTG	0.0030664	0.00711286	0.0622385	0.0295947	0.0294238	0.0275767	0.024924	0.0814212	0.0399839	0.0661696	0.0372084	0.0531247	trunc	0
TMTC3	ENST00000266712	ENST00000266712_11_uORF_2	12_88142403-88142460	uORF	ATG	1.97e-07	5.9819e-07	0.21564	0.122711	0.135368	0.10059	0.102022	0.166471	0.146778	0.195543	0.143577	0.152703	trunc	0
TNFRSF10B	ENST00000276431	ENST00000276431_9_uORF_2	8-:23068943-23068961	uORF	ATG	0.0033436	0.00772515	0.202754	0.422336	0.219512	0.264832	0.08	0.24559	0.130011	0.219969	0.277359	0.168892	CDS	0
TNFRSF21	ENST00000296861	ENST00000296861_2_uORF_1	6-:47309695-47309887	uORF	CTG	7.72e-09	2.45756e-08	0.522958	0.220808	0.171717	0.192174	0.503778	1.00466	0.641531	1.40928	0.276914	0.889814	CDS	1
TNFRSF21	ENST00000296861	ENST00000296861_2_uORF_2	6-:47309621-47309639	uORF	ATG	0.0018783	0.00445676	0.179797	0.133234	0.116162	0.0817391	0.13602	0.048951	0.321346	0.223629	0.127733	0.182486	CDS	1
TNIK	ENST00000436636	ENST00000436636_7_uORF_3	3-:171460320-171460395	uORF	ATG	1.49e-06	4.35549e-06	1.05665	0.966431	0.540741	0.43609	0.64876	1.68878	0.693122	0.68254	0.749979	0.928299	trunc	0
TNRC6B	ENST00000454349	ENST00000454349_7_uORF_3	22_40177989-40178019	uORF	ATG	1.89e-05	5.20523e-05	0.0551839	0.115207	0.0433985	0.0567652	0.0377747	0.0918635	0.0666824	0.0445141	0.0676388	0.0602087	trunc	0
TOB2	ENST00000327492	ENST00000327492_4_uoORF_1	22-:41437335-41437407|41446378-41446435	uoORF	CTG	0.0042611	0.00973742	0.154331	0.0970504	0.0669481	0.0800471	0.168505	0.0841362	0.103628	0.057929	0.0995942	0.10355	CDS	0
TOMM6	ENST00000398884	ENST00000398884_7_uoORF_2	6_41787680-41787722	uoORF	ATG	0.022826	0.0480697	0.0891844	0.0840708	0.0777953	0.0888089	0.0863806	0.0725248	0.0540937	0.0601415	0.0849648	0.0682852	CDS	0
TOMM70	ENST00000284320	ENST00000284320_6_uoORF_1	3-:100400935-100401004	uoORF	TTG	1.68e-05	4.64478e-05	0.0962484	0.0635042	0.0652234	0.0421783	0.0349146	0.079357	0.0383968	0.0417761	0.0667886	0.0486111	CDS	0
TOR1AIP2	ENST00000482587	ENST00000482587_5_uORF_2	1-:179865547-179865682	uORF	TTG	0.00016859	0.000438265	0.572872	0.28642	0.312812	0.362725	0.302738	0.334623	0.472424	0.585903	0.383707	0.423922	CDS	0
TOR1AIP2	ENST00000609928	ENST00000609928_6_uORF_5	1-:179852705-179852811|179865435-179865446	uORF	CTG	0.010204	0.0224469	0.128676	0.148744	0.0467033	0.166667	0.070761	0.0222883	0.199501	0.143885	0.122698	0.109109	CDS	0
TOR1AIP2	ENST00000482587	ENST00000482587_5_uORF_9	1-:179865786-179865822	uORF	CTG	0.016407	0.0350815	0.141414	0.0625514	0.126456	0.116232	0.0837359	0.141199	0.106676	0.339207	0.111663	0.167705	CDS	0
TOR1AIP2	ENST00000609928	ENST00000609928_6_uORF_7	1-:179852767-179852800	uORF	ATG	0.00046284	0.00115985	0.0744485	0.134673	0.103022	0.137597	0.0614152	0.0534918	0.160599	0.113309	0.112435	0.0972037	CDS	0
TOR1AIP2	ENST00000482587	ENST00000482587_5_uORF_4	1-:179865182-179865227	uORF	CTG	0.0012724	0.00306756	0.300144	0.117695	0.138103	0.0681363	0.078905	0.0212766	0.08418	0.114537	0.15602	0.0747248	CDS	0
TOR1AIP2	ENST00000482587	ENST00000482587_5_uORF_3	1-:179865720-179865783	uORF	ATG	1.4e-05	3.88901e-05	0.420635	0.22963	0.181364	0.372745	0.0966184	0.154739	0.464441	1.03084	0.301094	0.436659	CDS	0
TPX2	ENST00000340513	ENST00000340513_4_uORF_3	20_31742555-31742588	uORF	TTG	0.013682	0.0296401	0.0134935	0.0108053	0.00642308	0.0150612	0.0060701	0.0112236	0.0144246	0.0239669	0.0114458	0.0139213	trunc	0
TRAF7	ENST00000326181	ENST00000326181_11_uORF_1	16_2155812-2155858|2163882-2163905	uORF	ATG	0.0024185	0.00566056	0.262969	0.134298	0.10189	0.223265	0.0593301	0.267483	0.111722	0.124709	0.180605	0.140811	trunc	0
TRAM1	ENST00000262213	ENST00000262213_7_uORF_1	8-:70608258-70608336	uORF	ATG	2.28e-06	6.61067e-06	0.766436	0.836458	0.492974	0.485876	0.395161	1.19115	0.549917	0.639042	0.645436	0.693818	trunc	0
TRAPPC8	ENST00000283351	ENST00000283351_10_uORF_1	18-:31943067-31943091	uORF	ATG	6.1e-05	0.0001633	0.115901	0.0506241	0.0547633	0.105054	0.0683012	0.11543	0.0501326	0.183874	0.0815857	0.104434	CDS	0
TRIM2	ENST00000338700	ENST00000338700_10_uoORF_7	4_153204451-153204560|153270334-153270384	uoORF	ATG	4.37e-07	1.31064e-06	0.13323	0.06493	0.0467836	0.100309	0.0307195	0.0612076	0.0248722	0.037461	0.0863131	0.0385651	trunc	0
TRIM26	ENST00000454678	ENST00000454678_7_uORF_3	6-:30204708-30204756	uORF	ATG	7.49e-09	2.38564e-08	0.108624	0.168446	0.0871731	0.0930233	0.0824524	0.121538	0.150021	0.151002	0.114317	0.126253	trunc	0
TRIM26	ENST00000454678	ENST00000454678_7_uORF_2	6-:30201051-30201063	uORF	ATG	0.015625	0.0335	0.138907	0.276394	0.22665	0.218023	0.118393	0.0938462	0.169827	0.169492	0.214994	0.13789	trunc	0
TRIM28	ENST00000253024	ENST00000253024_10_uORF_3	19_58544733-58544757	uORF	CTG	0.013209	0.0286578	0.0144707	0.00496503	0.0113276	0.00836161	0.00302816	0.00842437	0.00434202	0.023509	0.00978122	0.00982588	trunc	0
TRIM37	ENST00000262294	ENST00000262294_12_uORF_1	17-:59106633-59106651	uORF	ATG	0.00097656	0.00237901	0.11646	0.174115	0.0341297	0.102418	0.193902	0.132051	0.297766	0.183333	0.106781	0.201763	CDS	0
TRMT1	ENST00000592062	ENST00000592062_5_uORF_4	19-:13116704-13116725	uORF	ATG	8.5e-06	2.38654e-05	0.0735723	0.0912574	0.132537	0.0560453	0.00881834	0.0678652	0.0433442	0.0487692	0.0883531	0.0421992	trunc	0
TRRAP	ENST00000456197	ENST00000456197_2_uORF_2	7_98881102-98881126	uORF	ATG	6.1e-05	0.0001633	0.0329244	0.0287879	0.0275105	0.0542311	0.00344353	0.039752	0.0281496	0.0228162	0.0358635	0.0235403	CDS	0
TSC22D2	ENST00000361875	ENST00000361875_7_uORF_1	3_150408669-150408696	uORF	ATG	0.0070995	0.0158926	0.18363	0.13969	0.114504	0.15367	0.0818071	0.158711	0.0925573	0.114178	0.147873	0.111813	CDS	0
TSPAN12	ENST00000222747	ENST00000222747_8_uORF_1	7-:120857882-120857936	uORF	CTG	2.86e-05	7.79751e-05	4.66957	2.12329	2.04	2.20779	2.34615	2.65854	0.888889	2.27273	2.76016	2.04158	trunc	0
TSPAN14	ENST00000372158	ENST00000372158_6_uORF_4	10_80468568-80468631	uORF	GTG	2.5e-07	7.55599e-07	0.0526092	0.0862372	0.0448649	0.0888889	0.000837521	0.0436214	0.056243	0.0814664	0.06815	0.0455421	CDS	0
TSPAN33	ENST00000486685	ENST00000486685_3_uORF_1	7_129144899-129144950	uORF	ATG	6.34e-07	1.88526e-06	0.44883	0.145455	0.205128	0.23166	0.0639535	0.547297	0.125227	0.379147	0.257768	0.278906	CDS	0
TSPYL1	ENST00000368608	ENST00000368608_4_uoORF_1	6-:116279826-116279877	uoORF	CTG	1.81e-06	5.26933e-06	0.0310186	0.00169309	0.0237376	0.024112	0.00403035	0.0256705	0.0290478	0.0209891	0.0201403	0.0199344	CDS	0
TSSC4	ENST00000333256	ENST00000333256_11_uORF_2	11_2400770-2400794	uORF	ATG	8.15e-06	2.29024e-05	0.200242	0.23748	0.210692	0.30094	0.126853	0.411552	0.176322	0.150748	0.237339	0.216369	CDS	0
TTC9	ENST00000256367	ENST00000256367_3_uORF_1	14_70641938-70642055	uORF	CTG	2.11e-16	1.06747e-15	1.92308	0.764463	0.742188	0.794521	0.646154	3.28105	1.38298	2.6087	1.05606	1.97972	trunc	0
TTC9C	ENST00000316461	ENST00000316461_9_uORF_3	11_62728568-62728649	uORF	ATC	1.41e-09	4.57914e-09	0.313433	0.269949	0.0851485	0.121622	0.268987	0.198312	0.247291	0.350877	0.197538	0.266367	trunc	0
TTLL4	ENST00000258398	ENST00000258398_8_uORF_2	2_218737595-218737664	uORF	ATG	2.19e-07	6.63823e-07	0.192564	0.153411	0.105177	0.166851	0.107843	0.0993612	0.151192	0.128758	0.154501	0.121789	trunc	0
TTYH3	ENST00000258796	ENST00000258796_12_uORF_2	7_2632046-2632085	uORF	ATG	1.32e-07	4.0379e-07	0.364738	0.25974	0.23525	0.212056	0.0492492	0.264373	0.169219	0.214724	0.267946	0.174391	trunc	0
TUBB2B	ENST00000259818	ENST00000259818_8_uoORF_3	6-:3227535-3227592	uoORF	ACG	1.32e-07	4.0379e-07	0.0683996	0.0479584	0.0348341	0.0464725	0.00825219	0.0713627	0.0601844	0.0517463	0.0494162	0.0478864	CDS	0
TUSC2	ENST00000232496	ENST00000232496_5_uORF_3	3-:50328141-50328165	uORF	ATG	0.0010428	0.00253112	0.940415	0.821192	0.576923	0.761905	0.815029	0.688073	0.866913	1.49438	0.775109	0.966099	trunc	0
TUT4	ENST00000257177	ENST00000257177_9_uORF_2	1-:52553055-52553073	uORF	ATG	0.00017114	0.000444578	0.104692	0.0683396	0.0376223	0.0140187	0.0569196	0.0599334	0.038347	0.0956284	0.056168	0.0627071	trunc	0
TWNK	ENST00000311916	ENST00000311916_8_uORF_1	10_100987823-100987892	uORF	ATG	3.22e-08	1.0058e-07	0.332492	0.224888	0.109615	0.471338	0.257749	0.155592	0.342731	0.232301	0.284583	0.247093	CDS	0
TXNL1	ENST00000217515	ENST00000217515_11_uORF_3	18-:56638442-56638505	uORF	ATC	0.0073124	0.0163542	0.0628308	0.0217449	0.0394462	0.0327159	0.0360779	0.0925788	0.0323346	0.0614137	0.0391844	0.0556012	CDS	0
UBC	ENST00000536769	ENST00000536769_1_uORF_2	12-:124914596-124914632	uORF	ATT	0.008162	0.0181064	0.00201577	0.00107626	0.00105234	0.000871033	0.000505906	0.000964696	0.0015765	0.00150667	0.00125385	0.00113844	trunc	0
UBE2D1	ENST00000373910	ENST00000373910_9_uoORF_2	10_58335133-58335211	uoORF	ACG	0.0028847	0.00670776	0.151068	0.0583493	0.111679	0.0851927	0.110048	0.380623	0.182553	0.167832	0.101572	0.210264	CDS	0
UBE2D2	ENST00000398733	ENST00000398733_8_uORF_3	5_139561533-139561593	uORF	ACG	0.0013179	0.00317386	0.239485	0.0981576	0.154851	0.124037	0.100744	0.177452	0.107418	0.135135	0.154133	0.130187	CDS	0
UBE2D3	ENST00000394804	ENST00000394804_6_uORF_12	4-:102827833-102827866	uORF	ATG	1.29e-05	3.58787e-05	0.0211684	0.0190584	0.0240678	0.0202064	0.0183109	0.0162512	0.0164044	0.00849552	0.0211253	0.0148655	CDS	0
UBE2E1	ENST00000306627	ENST00000306627_8_uoORF_4	3_23806014-23806088|23807236-23807384	uoORF	ACG	0.0030506	0.00708059	0.064224	0.0373926	0.0393204	0.0444239	0.0202166	0.133943	0.0315293	0.0456604	0.0463402	0.0578372	CDS	0
UBE2K	ENST00000261427	ENST00000261427_10_uoORF_1	4_39698214-39698379	uoORF	GTG	3.27e-10	1.0769e-09	0.308033	0.157841	0.123282	0.144744	0.0681696	0.23255	0.263223	0.248388	0.183475	0.203083	trunc	0
UBE2K	ENST00000261427	ENST00000261427_10_uORF_2	4_39698200-39698284	uORF	GTG	3.71e-06	1.0643e-05	0.260058	0.0570407	0.0580153	0.16217	0.0499195	0.144228	0.130825	0.137516	0.134321	0.115622	trunc	0
UBE3A	ENST00000648336	ENST00000648336_2_uORF_2	15-:25438952-25438976	uORF	ATG	8.15e-06	2.29024e-05	0.155115	0.0816968	0.056867	0.0536883	0.0714286	0.170213	0.110126	0.109255	0.0868417	0.115256	CDS	0
UBIAD1	ENST00000376810	ENST00000376810_6_uORF_1	1_11273232-11273253	uORF	ATG	0.0020752	0.00489264	0.229642	0.231863	0.264815	0.253561	0.0502431	0.183007	0.153846	0.154412	0.24497	0.135377	CDS	0
UBL7	ENST00000395081	ENST00000395081_7_uoORF_2	15-:74458836-74458896|74461036-74461090	uoORF	CTG	0.0078195	0.0174271	0.229091	0.351077	0.290102	0.377088	0.197015	0.30303	0.292806	0.117002	0.31184	0.227463	trunc	0
UBLCP1	ENST00000296786	ENST00000296786_8_uoORF_1	5_159268892-159268937	uoORF	CTG	0.00041118	0.00103687	0.0694199	0.0400381	0.0347913	0.0570919	0.0349568	0.0421394	0.0489306	0.069889	0.0503353	0.0489789	CDS	0
UBQLN1	ENST00000376395	ENST00000376395_9_uoORF_3	9-:83707662-83707827	uoORF	ACG	0.00071737	0.00176908	0.146025	0.0853875	0.109695	0.0749831	0.0793133	0.209641	0.0835808	0.18327	0.104023	0.138951	trunc	0
UBXN2A	ENST00000309033	ENST00000309033_5_uORF_3	2_23940603-23940648|23958300-23958303	uORF	GTG	0.0025801	0.00602627	0.216244	0.127976	0.179931	0.186253	0.0490654	0.160458	0.123524	0.254717	0.177601	0.146941	CDS	0
UCP2	ENST00000310473	ENST00000310473_9_uORF_0	11-:73981511-73981622	uORF	ATG	0	0	2.07149	1.8941	0.689764	1.84635	2.89069	2.78879	3.63676	2.83721	1.62543	3.03836	CDS	0
UGP2	ENST00000337130	ENST00000337130_10_uORF_6	2_63842067-63842184	uORF	ATA	3.96e-11	1.32833e-10	0.0733911	0.0364341	0.0368382	0.0435841	0.0334156	0.11483	0.0590029	0.0586579	0.0475619	0.0664767	trunc	0
UGP2	ENST00000337130	ENST00000337130_10_uORF_9	2_63842031-63842061	uORF	ATC	0.00026214	0.000670858	0.0230649	0.0151515	0.00352214	0.00410966	0.0140887	0.0273164	0.0105105	0.00889857	0.0114621	0.0152036	trunc	0
UHRF2	ENST00000276893	ENST00000276893_10_uORF_5	9_6413226-6413247	uORF	ATG	0.0020752	0.00489264	0.140916	0.0627615	0.0639386	0.0849968	0.0391389	0.319613	0.019616	0.0954861	0.0881532	0.118463	CDS	0
URI1	ENST00000392271	ENST00000392271_6_uORF_2	19_29942303-29942531	uORF	CTG	2.75e-07	8.30045e-07	0.501752	0.363065	0.389365	0.339967	1.11515	0.649842	0.349727	0.817391	0.398537	0.733028	trunc	0
USF1	ENST00000368021	ENST00000368021_7_uORF_3	1-:161045937-161045964	uORF	ATG	0.0066083	0.0148304	0.117666	0.079646	0.0462287	0.0719204	0.0827338	0.129956	0.0904694	0.087236	0.0788653	0.0975988	trunc	0
USO1	ENST00000514213	ENST00000514213_7_uORF_1	4_75724609-75724714	uORF	ATG	1.08e-07	3.31586e-07	0.105572	0.0436019	0.0725832	0.0549233	0.0902935	0.219419	0.0367933	0.0812419	0.0691701	0.106937	CDS	0
USP22	ENST00000261497	ENST00000261497_9_uoORF_3	17-:21042780-21042927	uoORF	CTG	4.89e-07	1.46285e-06	0.0742348	0.0285512	0.0477477	0.0343503	0.03157	0.108826	0.0260519	0.0619479	0.046221	0.057099	trunc	0
USP3	ENST00000380324	ENST00000380324_8_uoORF_2	15_63504701-63504758	uoORF	CTG	0.0017682	0.00420437	0.113342	0.0454343	0.152989	0.0660592	0.0284974	0.170306	0.0277136	0.178138	0.0944561	0.101164	CDS	0
USP36	ENST00000542802	ENST00000542802_7_uORF_1	17-:78838615-78838627	uORF	ATG	0.015625	0.0335	0.153455	0.126543	0.253886	0.220102	0.0635551	0.146682	0.165354	0.0763889	0.188497	0.112995	CDS	0
UTP3	ENST00000254803	ENST00000254803_4_uORF_1	4_70688632-70688659	uORF	GTG	0.016055	0.0343787	0.0582412	0.0324385	0.0769848	0.0346462	0.0427278	0.0664229	0.070754	0.0591716	0.0505777	0.0597691	CDS	0
VAC14	ENST00000261776	ENST00000261776_10_uORF_6	16-:70800929-70801079	uORF	CTG	1.24e-09	4.03241e-09	0.0681818	0.025974	0.0556122	0.0329128	0.16041	0.187747	0.0714884	0.103175	0.0456702	0.130705	CDS	0
VAC14	ENST00000261776	ENST00000261776_10_uORF_3	16-:70801128-70801146	uORF	ATG	0.0001286	0.00033697	0.191801	0.190704	0.0979592	0.178278	0.268259	0.252306	0.35828	0.205688	0.164685	0.271133	CDS	0
VARS1	ENST00000375663	ENST00000375663_8_uORF_4	6-:31795558-31795591	uORF	CTG	0.00028142	0.000718503	0.0135698	0.00284346	0.00961208	0.0125799	0.000735474	0.0133824	0.00466383	0.0127123	0.0096513	0.00787351	CDS	0
VARS1	ENST00000375663	ENST00000375663_8_uORF_2	6-:31795219-31795250|31795545-31795580	uORF	GTG	0.0023321	0.00546402	0.0313879	0.0187818	0.0157055	0.0172973	0.00551606	0.0350173	0.0183251	0.0230137	0.0207931	0.020468	CDS	0
VASH2	ENST00000517399	ENST00000517399_3_uORF_5	1_212950578-212950617	uORF	ATG	0.008134	0.0180511	0.222309	0.22452	0.0647011	0.120168	0.252454	0.232456	0.184345	0.134921	0.157924	0.201044	trunc	0
VASP	ENST00000245932	ENST00000245932_11_uORF_2	19_45507525-45507705	uORF	CTG	2.07e-07	6.28229e-07	0.143297	0.129385	0.0541684	0.0855696	0.0786704	0.255645	0.135746	0.18762	0.103105	0.16442	trunc	0
VASP	ENST00000245932	ENST00000245932_11_uORF_1	19_45507647-45507674	uORF	ATG	0.00015242	0.000397712	0.217935	0.240569	0.173085	0.169114	0.144321	0.129356	0.165805	0.112955	0.200176	0.138109	trunc	0
VAT1	ENST00000355653	ENST00000355653_8_uoORF_1	17-:43022300-43022369	uoORF	CTG	0.00021238	0.000547774	0.0261136	0.0133951	0.0114619	0.0116256	0.0128738	0.0251397	0.0134304	0.0217087	0.0156491	0.0182881	trunc	0
VPS18	ENST00000220509	ENST00000220509_10_uORF_1	15_40894610-40894718	uORF	ATC	0.0025907	0.00604762	0.0643671	0.0310529	0.0279635	0.0513029	0.069242	0.0579609	0.0526876	0.0333333	0.0436716	0.053306	trunc	0
VPS39	ENST00000318006	ENST00000318006_10_uORF_3	15-:42208267-42208294	uORF	ATG	0.00017246	0.000447729	0.0914754	0.0688623	0.0789474	0.0263362	0.0538278	0.0429958	0.117105	0.0796813	0.0664053	0.0734024	trunc	0
VRTN	ENST00000256362	ENST00000256362_5_uORF_2	14_74348472-74348589	uORF	TTG	1.04e-06	3.06454e-06	0.234791	0.176649	0.106659	0.220197	0.307971	0.653916	0.323966	0.233998	0.184574	0.379963	trunc	0
VRTN	ENST00000256362	ENST00000256362_5_uORF_3	14_74348512-74348533	uORF	ATG	0.0014806	0.0035476	0.146438	0.290986	0.124337	0.145027	0.110507	0.145719	0.249415	0.158447	0.176697	0.166022	trunc	0
VRTN	ENST00000256362	ENST00000256362_5_uoORF_1	14_74348589-74348652|74356782-74357073	uoORF	ATG	0.00015066	0.000393365	0.603791	0.649728	0.367708	0.479119	0.459239	0.806922	0.639735	0.524659	0.525086	0.607639	trunc	0
WAC	ENST00000354911	ENST00000354911_9_uORF_6	10_28533357-28533444	uORF	TTG	7.66e-06	2.15772e-05	0.079777	0.0781697	0.0290818	0.0606061	0.0405834	0.112375	0.0900424	0.0685401	0.0619086	0.0778851	CDS	0
WASF1	ENST00000359451	ENST00000359451_6_uORF_1	6-:110179462-110179477	uORF	ATG	0.00041649	0.00104909	0.228063	0.162907	0.12	0.145833	0.0400572	0.113982	0.0797676	0.0503597	0.164201	0.0710416	trunc	0
WASF2	ENST00000618852	ENST00000618852_5_uORF_1	1-:27490097-27490145	uORF	ATG	4.28e-08	1.33179e-07	0.0795046	0.0711462	0.0574041	0.0775071	0.0382206	0.0703934	0.0586558	0.0517504	0.0713905	0.054755	CDS	0
WASHC5	ENST00000318410	ENST00000318410_12_uORF_2	8-:125091617-125091698	uORF	TTG	0.00031745	0.000806625	0.0744574	0.0224041	0.0575035	0.0832755	0.0331906	0.0511364	0.05053	0.0318665	0.0594101	0.0416809	trunc	0
WASHC5	ENST00000318410	ENST00000318410_12_uORF_1	8-:125083951-125084014	uORF	ATG	4.67e-07	1.39904e-06	0.104174	0.130116	0.0511921	0.092297	0.0438972	0.119318	0.124382	0.132018	0.0944448	0.104904	trunc	0
WASL	ENST00000223023	ENST00000223023_5_uORF_1	7-:123748832-123748847	uORF	ATG	0.0081	0.017977	0.127574	0.103947	0.167247	0.147525	0.0753498	0.143535	0.119595	0.101777	0.136573	0.110064	trunc	0
WDR33	ENST00000322313	ENST00000322313_9_uORF_1	2-:127811107-127811140	uORF	ATG	3.95e-08	1.23094e-07	0.0482073	0.0392605	0.0464614	0.0644996	0.0174672	0.0682095	0.0288752	0.0433333	0.0496072	0.0394713	CDS	0
WDR82	ENST00000296490	ENST00000296490_8_uORF_2	3-:52278582-52278624	uORF	ATG	1.88e-10	6.22353e-10	0.101238	0.0671497	0.0904462	0.137931	0.0801193	0.148777	0.0625276	0.0962528	0.0991913	0.0969192	CDS	0
WIPI2	ENST00000288828	ENST00000288828_9_uORF_5	7_5190278-5190353	uORF	ATG	1.96e-08	6.17497e-08	0.203499	0.162058	0.068253	0.16194	0.110803	0.437284	0.213976	0.298507	0.148937	0.265143	CDS	0
WNK1	ENST00000530271	ENST00000530271_6_uORF_6	12_753275-753431	uORF	ATG	8.44e-08	2.60192e-07	0.0782464	0.0257647	0.043381	0.0459072	0.0513595	0.0284751	0.0332929	0.0577822	0.0483248	0.0427274	CDS	1
WNK1	ENST00000530271	ENST00000530271_6_uORF_5	12_753198-753300	uORF	GTG	0.0014749	0.0035351	0.0788013	0.0310003	0.0676804	0.0506329	0.0060423	0.0483327	0.0323007	0.0778223	0.0570287	0.0411245	CDS	1
WRN	ENST00000298139	ENST00000298139_7_uORF_3	8_31033890-31033973|31058371-31058435	uORF	ATG	2.82e-08	8.8312e-08	0.118911	0.0877483	0.130337	0.122329	0.0477674	0.174274	0.0608696	0.175799	0.114831	0.114677	trunc	0
WWC2	ENST00000403733	ENST00000403733_8_uORF_1	4_183099284-183099296	uORF	ATG	0.015625	0.0335	0.571363	0.328751	0.327989	0.201893	0.344575	0.624796	0.568449	0.559585	0.357499	0.524351	trunc	0
WWC2	ENST00000403733	ENST00000403733_8_uoORF_2	4_183099457-183099499	uoORF	ATG	0.00029012	0.000739812	0.114641	0.0252005	0.0881764	0.0315457	0.0395894	0.185971	0.025641	0.11399	0.0648909	0.0912977	trunc	0
XPO5	ENST00000265351	ENST00000265351_12_uORF_3	6-:43575866-43576007	uORF	TTG	0.0001605	0.000417902	0.032469	0.00990206	0.0177778	0.0187467	0.00536082	0.061991	0.0174367	0.0519588	0.0197239	0.0341868	CDS	0
XPOT	ENST00000332707	ENST00000332707_10_uORF_5	12_64409979-64410027	uORF	GTG	4.72e-07	1.41388e-06	0.0184281	0.0110006	0.00972608	0.0212096	0.0124861	0.0251945	0.0193785	0.0444343	0.0150911	0.0253734	CDS	0
XPOT	ENST00000332707	ENST00000332707_10_uORF_1	12_64404691-64404796	uORF	ACG	0.0059107	0.0133266	0.184754	0.112862	0.118301	0.119304	0.0382908	0.221934	0.117303	0.247824	0.133805	0.156338	CDS	0
XPR1	ENST00000367590	ENST00000367590_9_uORF_1	1_180632036-180632060	uORF	AAG	0.0030679	0.00711286	0.0596356	0.061888	0.0328947	0.0128274	0.0215164	0.0618221	0.0645582	0.0871731	0.0418114	0.0587675	CDS	0
XRCC3	ENST00000553264	ENST00000553264_5_uORF_2	14-:103711242-103711245|103711465-103711519	uORF	ATG	0.0091613	0.0202297	0.41	0.414698	0.198565	0.348946	0.295533	0.41411	0.22069	0.251748	0.343052	0.29552	CDS	0
YAP1	ENST00000615667	ENST00000615667_4_uORF_1	11_102110567-102110720	uORF	TTG	9.18e-09	2.91599e-08	0.0763138	0.0469021	0.0771463	0.0810494	0.0558893	0.110711	0.0872396	0.0926544	0.0703529	0.0866236	trunc	0
YARS1	ENST00000373477	ENST00000373477_9_uORF_2	1-:32817299-32817356	uORF	CTG	2.36e-05	6.46137e-05	0.0460466	0.0232114	0.0368852	0.0285075	0.0284168	0.0853396	0.0176451	0.0399688	0.0336627	0.0428426	CDS	0
YARS1	ENST00000373477	ENST00000373477_9_uORF_3	1-:32817270-32817303	uORF	GTG	0.0014288	0.00342797	0.0304815	0.0232114	0.00705829	0.0144893	0.0045106	0.0193776	0.0142686	0.0105284	0.0188102	0.0121713	CDS	0
YIPF2	ENST00000586748	ENST00000586748_6_uORF_1	19-:10928416-10928440|10928510-10928531	uORF	GTG	0.00060271	0.0014959	0.270085	0.285864	0.291295	0.305141	0.156584	0.292771	0.503479	0.349304	0.288096	0.325535	trunc	0
YIPF3	ENST00000506469	ENST00000506469_5_uoORF_2	6-:43516072-43516113|43516726-43516895	uoORF	CTG	1.19e-05	3.31793e-05	0.39822	0.244891	0.183638	0.221265	0.182162	0.304726	0.194692	0.188595	0.262004	0.217544	CDS	0
YME1L1	ENST00000326799	ENST00000326799_7_uORF_2	10-:27154232-27154319	uORF	ACG	6.52e-05	0.000174194	0.043094	0.0188942	0.01446	0.019262	0.0348365	0.0418259	0.0317234	0.0177343	0.0239276	0.03153	CDS	0
YTHDC1	ENST00000344157	ENST00000344157_9_uoORF_4	4-:68338351-68338384|68349725-68349782	uoORF	GTG	0.019897	0.0422049	0.0437265	0.0341463	0.0237489	0.0486871	0.037952	0.0612766	0.0562256	0.0599665	0.0375772	0.0538552	CDS	0
YTHDC1	ENST00000344157	ENST00000344157_9_uORF_2	4-:68349848-68349899	uORF	CTG	4.84e-06	1.37902e-05	0.0557476	0.0308943	0.0291207	0.0276258	0.0358038	0.058156	0.0485988	0.0324958	0.0358471	0.0437636	CDS	0
YTHDF3	ENST00000539294	ENST00000539294_6_uORF_2	8_63168700-63168874	uORF	ACG	0.011878	0.0259354	0.128224	0.0505206	0.0632575	0.063501	0.0486834	0.113233	0.0507023	0.0908108	0.0763758	0.0758575	CDS	0
ZC3H7B	ENST00000352645	ENST00000352645_5_uORF_1	22_41301577-41301661	uORF	ATG	6.05e-06	1.71443e-05	0.16564	0.135472	0.128272	0.302402	0.0816485	0.166471	0.191772	0.108475	0.182947	0.137092	trunc	0
ZDHHC7	ENST00000344861	ENST00000344861_9_uORF_3	16-:84995942-84995987	uORF	ATG	6.69e-06	1.89085e-05	0.2	0.480392	0.312808	0.393258	0.241803	0.297935	0.362934	0.107011	0.346615	0.252421	CDS	0
ZDHHC7	ENST00000344861	ENST00000344861_9_uORF_1	16-:85011375-85011393	uORF	ATG	0.00097656	0.00237901	0.61547	0.533333	0.674877	0.353933	0.684426	1.75221	0.712999	1.56827	0.544403	1.17948	CDS	0
ZFAND6	ENST00000261749	ENST00000261749_11_uORF_4	15_80098426-80098459	uORF	AAG	2.3e-05	6.30064e-05	0.0282276	0.0238946	0.0259947	0.0319727	0.00486224	0.0309136	0.030476	0.0342972	0.0275224	0.0251373	CDS	0
ZNF146	ENST00000443387	ENST00000443387_3_uORF_6	19_36236259-36236337	uORF	CTG	1.22e-05	3.39866e-05	0.317895	0.165233	0.158915	0.346614	0.272122	0.135333	0.259933	0.223097	0.247164	0.222621	CDS	0
ZNF146	ENST00000443387	ENST00000443387_3_uORF_5	19_36236075-36236153	uORF	ATT	3.13e-07	9.42411e-07	0.272	0.195111	0.152132	0.250996	0.182302	0.127333	0.25012	0.272966	0.21756	0.20818	CDS	0
ZNF146	ENST00000443387	ENST00000443387_3_uORF_10	19_36235941-36236037	uORF	ATG	0.0042261	0.00966121	0.0703158	0.090086	0.0552326	0.126494	0.177645	0.0573333	0.101484	0.111986	0.0855321	0.112112	CDS	0
ZNF146	ENST00000443387	ENST00000443387_3_uORF_8	19_36236346-36236418	uORF	ATG	2.19e-10	7.2432e-10	0.117895	0.124943	0.168605	0.13247	0.119095	0.0246667	0.125658	0.134733	0.135978	0.101038	CDS	0
ZNF146	ENST00000443387	ENST00000443387_3_uORF_9	19_36235869-36235887	uORF	ATG	0.012559	0.0273083	0.194105	0.0755998	0.0281008	0.0707171	0.0585496	0.04	0.11752	0.127734	0.0921307	0.085951	CDS	0
ZNF146	ENST00000443387	ENST00000443387_3_uORF_13	19_36236046-36236103	uORF	ATG	0.013627	0.0295319	0.0576842	0.0638298	0.0455426	0.0398406	0.0738523	0.0306667	0.0586405	0.0901137	0.0517243	0.0633183	CDS	0
ZNF146	ENST00000443387	ENST00000443387_3_uORF_11	19_36236149-36236197	uORF	ATG	0.0059311	0.013368	0.0732632	0.0593029	0.0600775	0.13745	0.139721	0.008	0.0976544	0.0524934	0.0825234	0.0744671	CDS	0
ZNF202	ENST00000530393	ENST00000530393_6_uORF_1	11-:123740438-123740498	uORF	ATG	6.8e-07	2.01836e-06	0.161215	0.323404	0.15	0.0564972	0.0760369	0.151807	0.228489	0.273973	0.172779	0.182577	trunc	0
ZNF217	ENST00000371471	ENST00000371471_7_uORF_1	20-:53583069-53583102	uORF	ATG	8.22e-05	0.00021814	0.0394821	0.0465373	0.0263287	0.0386134	0.01945	0.0217845	0.0415631	0.0347349	0.0377404	0.0293831	CDS	0
ZNF22	ENST00000298299	ENST00000298299_4_uORF_1	10_45003307-45003319	uORF	ATG	0.015625	0.0335	0.0944186	0.0720028	0.0182371	0.10514	0.0123167	0.112069	0.108284	0.121404	0.0724497	0.0885182	CDS	0
ZNF253	ENST00000589717	ENST00000589717_2_uoORF_1	19_19865950-19865999|19878480-19878497	uoORF	ATT	0.012824	0.0278638	0.0761511	0.00907188	0.0521542	0.0112652	0.0214753	0.0714286	0.0685197	0.0402145	0.0371606	0.0504095	trunc	0
ZNF260	ENST00000523638	ENST00000523638_6_uORF_1	19-:36525202-36525301	uORF	ATG	0.0019718	0.00466162	0.564356	0.259528	0.242857	0.272575	0.0625	0.478022	0.180573	0.103053	0.334829	0.206037	trunc	0
ZNF394	ENST00000337673	ENST00000337673_7_uoORF_1	7-:99500055-99500166	uoORF	ATG	1.94e-07	5.89202e-07	0.373692	0.251064	0.210526	0.190476	0.447531	0.31728	0.328482	0.307317	0.25644	0.350153	trunc	0
ZNF417	ENST00000312026	ENST00000312026_6_uORF_8	19-:57916415-57916457	uORF	GTG	0.0056493	0.0127623	0.209856	0.0439443	0.147005	0.10099	0.00182815	0.107623	0.00834598	0.0751634	0.125449	0.0482402	trunc	0
ZNF462	ENST00000277225	ENST00000277225_10_uORF_2	9_106863195-106863216	uORF	ATG	0.0087039	0.0192575	0.0342208	0.0394546	0.0196262	0.0274532	0.0252969	0.0263023	0.0289574	0.0412472	0.0301887	0.030451	CDS	1
ZNF496	ENST00000294753	ENST00000294753_8_uORF_3	1-:247331432-247331510	uORF	ATG	9.77e-06	2.73446e-05	0.188079	0.108894	0.0601202	0.133468	0.0228571	0.15873	0.139411	0.190153	0.122641	0.127788	CDS	0
ZNF496	ENST00000294753	ENST00000294753_8_uORF_2	1-:247330020-247330081|247331431-247331619	uORF	GTG	5.28e-11	1.76645e-10	0.324062	0.235245	0.11523	0.278059	0.198571	0.593651	0.237337	0.305603	0.238149	0.333791	CDS	0
ZNF532	ENST00000591808	ENST00000591808_6_uORF_2	18_58865514-58865538	uORF	ATG	0.013209	0.0286578	0.043649	0.0202004	0.0227944	0.026941	0.0119969	0.017562	0.0343888	0.0153625	0.0283962	0.0198275	CDS	0
ZNF587	ENST00000339656	ENST00000339656_8_uORF_11	19_57849992-57850034	uORF	GTG	0.0056493	0.0127623	0.132227	0.0308271	0.110959	0.0699588	0.00136612	0.0834783	0.0053012	0.0459082	0.085993	0.0340134	CDS	0
ZNF649	ENST00000354957	ENST00000354957_8_uORF_2	19-:51900173-51900263	uORF	ATG	0.0047518	0.010809	0.267798	0.264949	0.118433	0.10582	0.178749	0.154135	0.146322	0.155187	0.18925	0.158598	CDS	0
ZNF695	ENST00000339986	ENST00000339986_8_uoORF_3	1-:247000043-247000074|247007905-247007970	uoORF	CTG	0.00012842	0.00033686	0.207783	0.0861141	0.105263	0.238938	0.0507246	0.193162	0.157248	0.1225	0.159524	0.130909	trunc	0
ZNF74	ENST00000400451	ENST00000400451_7_uORF_1	22_20394284-20394377	uORF	ATG	6.11e-06	1.73076e-05	0.159272	0.146893	0.129195	0.235437	0.109551	0.617925	0.157456	0.334286	0.167699	0.304804	trunc	0
ZNF740	ENST00000416904	ENST00000416904_5_uORF_1	12_53181848-53181899	uORF	ATG	3.36e-05	9.13096e-05	0.651042	0.719902	0.449568	0.484241	0.990654	0.396396	0.487113	0.354839	0.576188	0.557251	CDS	0
ZNRF1	ENST00000566250	ENST00000566250_5_uORF_3	16_74999462-74999615	uORF	ATT	0.0058715	0.0132429	0.458333	0.215818	0.608997	0.172973	0.287791	0.185676	0.13272	0.361564	0.36403	0.241938	CDS	0
ZNRF2	ENST00000323037	ENST00000323037_5_uORF_1	7_30284931-30285066	uORF	ATG	0.0027088	0.00631378	1.59244	0.864734	0.920455	1.45614	1.52941	3.66667	0.902098	3.09524	1.20844	2.29835	trunc	0
ZSCAN10	ENST00000576985	ENST00000576985_6_uORF_2	16-:3099204-3099246	uORF	CTG	7.68e-07	2.27518e-06	0.102246	0.0700125	0.0562061	0.0774818	0.0400091	0.170889	0.0659849	0.0525539	0.0764865	0.0823592	CDS	0
ZSCAN10	ENST00000576985	ENST00000576985_6_uoORF_1	16-:3092822-3093004|3099189-3099268	uoORF	CTG	5.71e-06	1.62059e-05	0.110327	0.10359	0.0565406	0.0862358	0.0606956	0.159081	0.133106	0.104923	0.0891733	0.114452	CDS	0
ZYG11B	ENST00000294353	ENST00000294353_7_uoORF_1	1_52726642-52726683|52756457-52756497	uoORF	ACG	0.0058734	0.0132461	0.0905227	0.0762479	0.0858209	0.0717054	0.00856031	0.0989273	0.0383302	0.0943114	0.0810743	0.0600323	trunc	0
ZZZ3	ENST00000370801	ENST00000370801_8_uORF_1	1-:77641584-77641596	uORF	ATG	0.0019531	0.00462039	1.41071	0.743719	0.363095	1.37719	0.11828	0.594203	0.717172	0.62963	0.97368	0.514821	trunc	0
ZZZ3	ENST00000370801	ENST00000370801_8_uORF_3	1-:77633368-77633405|77639448-77639471	uORF	ATG	0.0040019	0.00918884	0.952381	1	0.630952	0.552632	0.602151	0.15942	0.548822	0.37037	0.783991	0.420191	trunc	0

## Sheet: uORFs in DAP5 targets
	PRICE prediction					uORF/CDS ratio								mean uORF/CDS ratio
symbol	Location	Type	Codon	p_value	FDR	shNT1	shNT2	shNT3	shNT4	shDAP5_1	shDAP5_2	shDAP5_3	shDAP5_4	shNT	shDAP5
ANKRD11	16-:89490470-89490551	uORF	CTG	7.49e-15	3.01235e-14	0.239107	0.135714	0.137308	0.128958	0.0325991	0.385702	0.106069	0.130172	0.160272	0.163636
ARHGAP35	19_46861139-46861196	uORF	ATG	6.65e-06	1.88045e-05	0.0545508	0.04769	0.0673759	0.0797872	0.0779768	0.169543	0.0463852	0.077821	0.062351	0.0929315
AZIN1	8-:102863878-102864016	uORF	TTG	0.00092873	0.00226929	0.890046	0.227137	0.354439	0.239384	0.945813	1.59764	0.537825	1.01928	0.427751	1.02514
AZIN1	8-:102863862-102863916	uORF	ATG	1.54e-05	4.2686e-05	1.03177	0.358836	0.440927	0.325902	0.463054	1.46457	0.373255	0.831782	0.539359	0.783165
CCNI	4-:77075554-77075566	uORF	ATG	0.0019531	0.00462039	0.0394993	0.0216823	0.0223652	0.0292835	0.0608318	0.0141414	0.0151194	0.0125224	0.0282076	0.0256538
CDC42BPB	14-:103057231-103057387	uORF	ATG	0.002088	0.00492123	0.0464157	0.0177989	0.0315675	0.0334015	0.0511892	0.154407	0.0243026	0.014176	0.0322959	0.0610188
CHSY1	15-:101251922-101251934	uORF	ATG	0.0060105	0.0135303	0.43296	0.20739	0.343486	0.214801	0.484728	1.13714	0.577555	0.416968	0.299659	0.654098
CUL5	11_108009040-108009148	uORF	ATG	2.99e-09	9.62076e-09	0.238767	0.114317	0.0916745	0.0937782	0.152778	0.361974	0.184542	0.216867	0.134634	0.22904
H2AC6	6_26124197-26124227	uORF	AGG	0.0012622	0.00304398	0.0447386	0.0204971	0.0142431	0.0203525	0.0636386	0.0327482	0.0349166	0.0164536	0.0249578	0.0369392
H2BC12	6-:27146810-27146834	uORF	CTG	6.1e-05	0.0001633	0.0118338	0.00318004	0.00728761	0.00580793	0.0111161	0.010202	0.013035	0.0128452	0.00702733	0.0117996
LGR4	11-:27472661-27472718	uORF	CTG	2.15e-06	6.24178e-06	0.164614	0.0642115	0.0767375	0.0691076	0.0941828	0.287262	0.15663	0.135016	0.0936677	0.168273
LGR4	11-:27472639-27472669	uORF	ATG	0.00016254	0.000422988	0.16523	0.0550834	0.0912162	0.135927	0.0925999	0.217071	0.0976599	0.140505	0.111864	0.136959
LGR4	11-:27472445-27472511	uORF	ATG	3.1e-07	9.33666e-07	0.0422824	0.0223481	0.0149614	0.0215103	0.0494658	0.0103986	0.0397816	0.0499451	0.0252756	0.0373978
MAPK6	15_52019250-52019390|52045829-52045899	uORF	ATG	0	0	0.414458	0.225073	0.323685	0.484494	0.922385	1.44986	2.40226	2.74879	0.361928	1.88082
MAPK6	15_52046012-52046060	uORF	ATG	1.24e-05	3.45339e-05	0.0915663	0.0961802	0.148797	0.0835955	0.134983	0.0112465	0.190226	0.137681	0.105035	0.118534
MAPKAP1	9-:125707113-125707143	uORF	ATG	0.0013428	0.00322958	1.12301	1.15144	0.643575	0.466355	0.233474	2.08492	1.04696	1.4741	0.846096	1.20986
MAPKAP1	9-:125672603-125672621	uORF	ATG	4.02e-06	1.14941e-05	0.218737	0.334156	0.10838	0.271028	0.255977	0.162518	0.172496	0.0627943	0.233075	0.163447
MFHAS1	8-:8893408-8893561	uORF	ACG	1.02e-11	3.4599e-11	2.08553	0.261261	0.242188	0.780488	5.36364	12.4516	2.7	1.95082	0.842366	5.61652
NETO2	16-:47143754-47143856	uORF	ATG	4.05e-09	1.29886e-08	1.15407	0.607914	0.7	0.812903	0.326848	6.44444	0.716584	2.71667	0.818722	2.55114
POMK	8_43097556-43097615|43102504-43102538	uORF	ATG	7.29e-11	2.4303e-10	0.489715	0.428774	0.256595	0.425066	0.60499	0.981928	0.619284	0.535754	0.400037	0.685489
POMK	8_43097530-43097548	uORF	ATC	0.00097656	0.00237901	0.0431171	0.060241	0.00879297	0.0394391	0.0280665	0.151807	0.137957	0.0924092	0.0378975	0.10256
PPP4R3B	2-:55617575-55617590	uORF	ATG	0.0016	0.0038159	0.282306	0.253348	0.207113	0.188735	0.428571	0.563218	0.474679	0.834008	0.232875	0.575119
PPP4R3B	2-:55617350-55617419	uORF	ATG	7.84e-10	2.56147e-09	0.185686	0.214247	0.15795	0.0958498	0.550351	0.142529	0.153439	0.57085	0.163433	0.354292
PROSER1	13-:39037785-39037938	uORF	ATG	1.14e-07	3.49677e-07	0.202786	0.0793167	0.0869198	0.0914502	0.266445	0.303512	0.157561	0.240033	0.115118	0.241888
PROSER1	13-:39037995-39038016	uORF	ATG	0.0022268	0.00522483	0.0459973	0.0448444	0.0126582	0.0275974	0.0474604	0.0652174	0.0325989	0.0789037	0.0327743	0.0560451
RNF10	12_120534696-120534957	uoORF	ATG	3.72e-11	1.24854e-10	0.386642	0.245786	0.309052	0.268901	0.551627	0.615152	0.336729	0.580029	0.302595	0.520884
ROCK1	18-:21111214-21111241	uORF	ATG	0.0022123	0.00519497	0.0650285	0.0216143	0.0589155	0.0112461	0.0193861	0.00677966	0.0234657	0.0351494	0.0392011	0.0211952
ROCK1	18-:21111553-21111574	uORF	CTG	0.00054399	0.00135509	0.10878	0.0239784	0.0109489	0.0184435	0.0177706	0.254237	0.0541516	0.0984183	0.0405378	0.106144
TMEM184C	4_147617614-147617659	uORF	CTG	6.69e-06	1.89085e-05	0.589251	0.237245	0.519126	0.355469	1.42105	1.0367	0.789044	1.32864	0.425273	1.14386
TMEM184C	4_147617441-147617471	uORF	ATG	3.81e-06	1.0916e-05	0.262956	0.318878	0.147541	0.275391	0.25731	0.614679	0.665501	0.258216	0.251191	0.448926
TMEM184C	4_147617722-147617833	uORF	AGG	3.27e-08	1.02109e-07	0.318618	0.123724	0.218579	0.160156	0.520468	0.123853	0.329837	0.422535	0.20527	0.349173
TNFRSF21	6-:47309695-47309887	uORF	CTG	7.72e-09	2.45756e-08	0.522958	0.220808	0.171717	0.192174	0.503778	1.00466	0.641531	1.40928	0.276914	0.889814
TNFRSF21	6-:47309621-47309639	uORF	ATG	0.0018783	0.00445676	0.179797	0.133234	0.116162	0.0817391	0.13602	0.048951	0.321346	0.223629	0.127733	0.182486
WNK1	12_753275-753431	uORF	ATG	8.44e-08	2.60192e-07	0.0782464	0.0257647	0.043381	0.0459072	0.0513595	0.0284751	0.0332929	0.0577822	0.0483248	0.0427274
WNK1	12_753198-753300	uORF	GTG	0.0014749	0.0035351	0.0788013	0.0310003	0.0676804	0.0506329	0.0060423	0.0483327	0.0323007	0.0778223	0.0570287	0.0411245
ZNF462	9_106863195-106863216	uORF	ATG	0.0087039	0.0192575	0.0342208	0.0394546	0.0196262	0.0274532	0.0252969	0.0263023	0.0289574	0.0412472	0.0301887	0.030451

## Sheet: manually identified uORFs
	PRICE prediction
Gene	Location	Type	Codon	p_value
genes with CDS on different transcript
MPRIP	17+:17042600-17042663	uORF	ATG	0.00030429
MPRIP	17+:17042536-17042557	uORF	ACG	0.000729
NCKAP1	2-:183038210-183038228	uORF	ATG	0.012559
PAPOLA	14+:96502411-96502447	uORF	ATG	1.8346e-12
PAPOLA	14+:96502525-96502567	uORF	ATG	2.0087e-09
SETD5	3+:9428830-9428911	uORF	ATG	5.3229e-10
SETD5	3+:9428844-9428898	uORF	TTG	0.00027823
SETD5	3+:9422818-9422920	uORF	CTG	0.0013233
SETD5	3+:9397882-9397903	uORF	GTG	0.0087039
SETD5	3+:9423206-9423248	uORF	ATG	0.02126
SETD5	3+:9424491-9424524	uORF	TTG	0.034934
SETD5	3+:9422765-9422801	uORF	ATG	0.038969
Genes identified as fusion proteins and/or truncated variants
TOP2B	3-:25664815-25664893	uORF	ATG	7.1951e-07
TOP2B	3-:25664713-25664758	uORF	ACG	3.3792e-06
TOP2B	3-:25664405-25664432	uORF	ATG	0.00015242
TOP2B	3-:25664529-25664556	uORF	CTG	0.63672
XPO6	16-:28211548-28211575	uORF	ATG	0.04327
XPO6	16-:28211519-28211549	uORF	AGG	0.074015
XPO6	16-:28211436-28211445	uORF	ATG	0.11111
XPO6	16-:28211877-28211886	uORF	ATG	0.11111
DICER1	14-:95157288-95157339	uORF	ATG	0.012665
DICER1	14-:95157377-95157386	uORF	ATG	0.11111
CDS not identified
GPBP1L1	1-:45660664-45660745	uORF	ATG	4.3438e-05
GPBP1L1	1-:45660789-45660813	uORF	ATG	6.1035e-05
GPBP1L1	1-:45660497-45660554	uORF	ATA	0.00048511
GPBP1L1	1-:45660611-45660635	uORF	ATG	0.0010428
GPBP1L1	1-:45660576-45660591	uORF	ATG	0.0021085
GPBP1L1	1-:45660366-45660432	uORF	ATG	0.0024137
GPBP1L1	1-:45661157-45661199	uORF	ATG	0.0029914
GPBP1L1	1-:45686492-45686507	uORF	ATG	0.0081
GPBP1L1	1-:45660683-45660704	uORF	ATG	0.0083038
GPBP1L1	1-:45660752-45660782	uORF	ATA	0.0093652
GPBP1L1	1-:45660714-45660732	uORF	ATG	0.011596
GPBP1L1	1-:45660977-45660986	uORF	ATG	0.027778
incorrect splice variant used in analysis, exon misidentified as intron and thus uORF categorized as ncRNA
MARK3	14+:103385545-103385662	ncRNA	ATG	1.3205e-06
MARK3	14+:103385788-103385887	ncRNA	CTG	0.013759
MARK3	14+:103385441-103385498	ncRNA	GTG	0.11064
MARK3	14+:103385639-103385729	ncRNA	CTG	0.82069
manually observed uORFs that did not pass PRICE filters
WNK1	12+:752943-752958	uORF	ATG	0.0001
WNK1	12+:752702-752780	uORF	CTG	0.28101
WNK1	12+:752615-752663	uORF	GTG	0.79247
