# Supplementary material for: DAP5 drives translation of specific mRNA targets with upstream ORFs in human embryonic stem cells
Source: RNA. 2022 Oct;28(10):1325–36. doi: 10.1261/rna.079194.122 (PMC9479741; doi:10.1261/rna.079194.122)
Supplement: Supplemental Material [file supp_079194.122_Supplemental_Table_S4.xlsx]

## Sheet: DAP5 bound mRNAs
		CS antibody		MBL antibody
Gene Name	baseMean	ratio IP/Total	padj	ratio IP/total	padj		DAP5 translation target
ABAT	87.1806	2.24277	0.00733474	2.24183	0.00504203
ABCA1	110.991	2.95068	0.000144512	5.92268	1.45796e-11
ABCA2	314.444	2.54636	5.55378e-06	3.53655	1.14524e-10
ABCA3	413.245	2.06628	6.16917e-05	2.51179	8.98912e-08
ABCC1	765.532	2.21985	9.52864e-08	3.46727	2.81338e-18
ABHD2	503.769	2.09282	0.000137195	3.83945	6.66138e-14
ABL1	658.622	2.38624	5.8523e-14	3.81183	4.90176e-33
ABL2	360.963	3.73039	5.42404e-16	4.75399	1.07683e-22
ABR	713.087	2.69228	9.38013e-10	4.03583	3.90211e-19
ABTB2	60.2113	4.21036	0.00036437	6.31856	1.2142e-06
ACAD10	164.736	2.18469	0.00912646	3.13641	3.02526e-05
ACTN4	1484.56	2.61752	1.79835e-23	3.10123	7.47589e-33
ACVR1B	326.826	3.43223	1.41008e-11	3.13709	2.37531e-10
ACVR2B	2535.65	2.57197	1.05422e-12	5.66043	5.90785e-42
ADAM11	112.181	2.43136	0.000661196	3.03635	6.44016e-06
ADAM19	160.384	3.71302	4.03067e-08	4.67619	2.53827e-11
ADAM23	333.547	2.74049	6.18103e-07	2.4869	4.95341e-06
ADAMTS15	108.96	2.8684	0.000793294	6.52854	6.12208e-11
ADAMTS7	871.82	2.74756	1.83749e-09	3.48605	1.89633e-14
ADAMTSL4	62.1522	2.37048	0.0253213	2.33021	0.0211646
ADARB1	90.8681	2.24042	0.0268658	2.43256	0.00904236
ADCY1	630.603	4.30087	2.75433e-23	6.32385	1.21257e-37
ADCY2	555.293	2.3182	3.49988e-08	3.07998	1.71811e-14
ADCY6	342.038	2.82462	6.8524e-12	3.291	7.50508e-16
ADCYAP1R1	505.571	2.46548	8.54469e-09	6.36465	5.62575e-36
ADGRA3	387.079	2.49872	5.12142e-07	3.216	2.63273e-11
ADGRB2	393.836	2.07523	0.0002497	2.66822	1.75432e-07
ADGRL1	4949.1	3.47414	4.92087e-35	3.45406	2.75485e-35
ADGRL3	56.0778	2.5084	0.0316057	3.57018	0.00102355
ADRBK1	451.324	2.83773	2.87518e-09	3.52546	1.395e-13
AFAP1	168.967	3.08256	8.93527e-08	4.09621	3.32742e-12
AGAP1	394.786	2.12754	0.00179466	3.93871	5.48387e-10
AGAP3	996.82	2.54089	1.44443e-18	2.78988	8.26298e-23
AGO1	351.084	2.09917	7.71141e-05	3.51819	5.85052e-13
AGO2	131.423	2.6873	5.32979e-05	3.68436	1.75182e-08
AGRN	1471.96	2.69838	3.0703e-16	5.09777	1.60901e-43
AHDC1	266.121	3.76683	1.25391e-12	5.88727	1.11795e-22
AHNAK	72.3419	2.05982	0.0347352	3.13472	0.000178659
AHNAK2	179.013	2.52197	0.000135362	5.70794	5.38003e-15
AKAP1	1146.12	2.14163	1.9811e-16	2.10927	3.55161e-16
AKAP13	1036.2	2.15197	2.92508e-09	3.47189	7.60737e-24
ALKBH5	531.465	2.50108	3.29582e-11	2.25004	3.30829e-09
ALMS1	382.036	2.20618	0.000199224	2.7436	5.4613e-07
ALPK3	536.484	2.80954	8.02916e-12	4.65877	4.49353e-26
AMER1	200.566	3.7746	1.0555e-07	5.11496	1.23981e-11
AMOTL1	532.889	3.4879	3.93318e-11	4.59917	1.10505e-16
ANGEL1	132.163	3.28014	5.93261e-07	4.35355	1.18928e-10
ANKFY1	361.221	2.41827	1.79559e-08	3.83267	2.82211e-19
ANKRD11	6126.69	2.33793	9.48699e-12	2.91724	1.18346e-18		yes
ANKRD27	192.269	2.50952	8.92752e-06	3.05166	1.88834e-08
ANKS1A	882.347	2.39058	6.31917e-14	3.80682	1.17999e-32
ANO6	559.012	2.15708	7.90666e-05	2.29408	9.64657e-06
AP3D1	5038.3	2.4684	1.46266e-13	3.36064	2.54373e-24
APBA2	440.236	2.53992	2.10848e-08	2.42365	6.35697e-08
APC2	175.481	3.96132	2.69017e-09	5.43259	3.95188e-14
AR	167.172	3.03964	0.000786182	4.36833	2.13937e-06
ARAP1	1444.49	2.35336	2.519e-10	3.91141	1.09071e-25
AREL1	260.378	2.8649	9.89399e-05	3.34401	3.14307e-06
ARFGEF3	559.135	2.14082	1.33754e-07	3.60158	7.87653e-21
ARHGAP10	68.4122	2.75837	0.0196126	4.17701	0.000296173
ARHGAP19	205.341	2.44788	0.000242856	5.28867	1.0851e-13
ARHGAP23	417.541	2.7264	4.9122e-13	3.46314	3.77907e-20
ARHGAP26	144.559	2.26817	0.00533736	2.52564	0.000834423
ARHGAP27	56.9822	3.21993	0.00087121	4.05931	2.44579e-05
ARHGAP35	1603.83	2.28967	1.67582e-11	4.0911	1.18665e-32		yes
ARHGEF10L	612.741	3.10468	1.348e-12	3.49654	1.29508e-15
ARHGEF11	757.896	3.74166	2.01703e-27	3.59846	2.66773e-26
ARHGEF17	79.6617	4.62677	7.86981e-05	5.25233	8.93603e-06
ARHGEF18	741.77	2.15401	3.76263e-11	3.72415	2.53197e-32
ARHGEF4	533.294	2.86966	7.46177e-14	4.34561	5.90801e-27
ARHGEF40	914.236	2.26754	4.84724e-12	3.31263	1.34209e-25
ARID1A	1497.87	2.8348	2.07797e-22	3.54448	2.28705e-33
ARID1B	771.541	3.3197	5.12414e-22	3.10834	3.99914e-20
ARID3A	1512.79	3.39259	1.98807e-19	3.7781	2.4282e-23
ASB13	342.723	2.1332	4.19264e-05	2.39211	8.89717e-07
ASTN1	118.387	2.63917	0.00753587	3.99262	3.29106e-05
ATCAY	1317.13	2.23958	1.64275e-11	3.39194	4.25691e-26
ATG16L1	147.171	3.21487	0.00238026	3.46032	0.000712532
ATN1	737.795	2.00286	7.58191e-08	2.28993	3.38304e-11
ATP10A	65.822	3.68346	0.000251114	3.74938	0.000123609
ATP13A3	274.708	2.34014	0.000495076	3.09481	8.79552e-07
ATP8B2	547.732	3.15926	1.86312e-16	2.76389	2.53672e-13
ATP9A	111.818	2.19328	0.0162532	4.23247	6.30847e-07
ATRN	264.656	2.05669	0.000309513	4.2412	2.66238e-15
AUTS2	1221.55	2.24906	1.77861e-10	2.85092	1.92969e-17
AXIN1	588.312	2.06592	6.0545e-08	2.50587	1.12656e-12
B3GLCT	88.2415	2.2306	0.014688	2.01541	0.0277958
B3GNT7	745.059	2.22571	1.20396e-09	3.06962	9.47554e-19
B4GALNT4	1211.71	2.3198	3.11675e-13	2.67183	3.27108e-18
B4GALT1	308.523	2.45863	2.17924e-06	2.73288	4.45686e-08
B4GALT5	961.502	3.31661	4.00847e-14	3.05791	1.04037e-12
BAIAP2-AS1	302.3	2.1734	0.00360902	2.98711	9.51006e-06
BAZ2A	1895.01	2.11875	1.4912e-06	6.45684	1.98532e-37
BCAS3	93.0761	3.06679	0.00116616	3.90098	2.93701e-05
BCL11B	105.733	17.9105	2.58512e-14	11.6262	8.06147e-11
BCL2L2	102.486	3.55901	0.000593359	2.96002	0.00283523
BCL7A	252.027	2.59019	4.73751e-08	3.9594	1.30019e-16
BCL9	202.601	2.50313	0.00281893	2.77197	0.000469081		yes
BCL9L	485.823	2.97339	1.53817e-09	3.84342	1.37893e-14
BCOR	541.93	2.5211	2.81588e-08	3.91078	1.21203e-17
BCORL1	111.832	4.16187	7.87424e-08	5.65273	1.28468e-11
BCR	1484.82	2.13791	8.87468e-11	3.9897	6.66046e-35
BEND3	485.047	2.56356	4.48394e-07	3.6296	5.28796e-13
BEND4	202.07	2.64338	0.000336757	3.30921	3.26887e-06
BGN	81.6769	2.72998	0.00565561	7.25879	8.07134e-10
BICD2	279.353	2.06304	0.002133	4.42873	2.75099e-12
BMF	249.267	2.0422	8.05215e-05	2.55737	4.27484e-08
BMP7	108.927	2.57204	0.0355559	2.42183	0.0392961
BRD3	2004.92	2.46672	1.26812e-24	2.70113	3.14771e-30
BRD4	4068.63	3.29986	1.22992e-21	3.40776	3.17632e-23
BRF1	384.659	2.22776	1.6486e-06	2.81988	9.50339e-11
BRPF3	160.581	3.36516	6.90995e-07	4.72859	3.3575e-11
BSN	71.3178	4.59478	6.99411e-06	6.84675	2.71436e-09
BTBD7	295.953	2.19767	7.12783e-05	2.2058	3.9018e-05
BTBD9	59.7953	2.78219	0.0131811	3.74351	0.000510483
BTN2A1	160.41	2.57262	0.0156489	2.49792	0.0140832
BZRAP1	105.247	3.57059	0.000406392	3.11649	0.0012612
C22orf46	185.734	2.38425	0.00610492	2.22176	0.00913656
C2CD3	112.625	2.87685	0.00100162	3.30538	9.2191e-05
C2CD4C	215.608	2.56288	1.27128e-05	2.96391	1.59986e-07
CABIN1	1411.22	2.37234	4.11489e-11	3.95687	1.08316e-27
CACNA1G	162.879	2.23396	0.00500842	3.49087	1.80056e-06
CACNA1H	632.343	3.48969	2.10828e-13	3.64698	1.09643e-14
CACNA2D2	380.595	2.70771	1.01851e-07	4.63733	7.62602e-18
CACTIN	764.317	2.44452	1.36392e-10	2.68344	4.10113e-13
CAMKK2	1098.42	2.20367	9.78444e-08	2.49249	2.06589e-10
CAPN15	1082.13	2.51992	1.28075e-17	2.99704	4.16634e-25
CARD11	802.036	2.20679	3.45675e-05	2.32636	4.91963e-06
CASK	358.733	2.53084	2.78971e-07	2.44667	4.54234e-07
CASKIN2	324.865	2.24163	0.000171008	4.64539	8.49425e-15
CASP2	118.083	2.23441	0.00179488	2.46138	0.000232495
CBL	485.064	2.21486	8.917e-07	4.02969	6.869e-20
CBX6	1212.6	4.03686	3.72409e-32	3.92179	2.20436e-31
CDC23	159.575	2.03105	0.00476473	2.18112	0.00103756
CDC42BPB	491.617	2.51524	4.00436e-05	3.95379	8.38169e-11		yes
CDCP1	641.688	2.40052	4.55304e-10	2.97117	1.36241e-15
CDH2	350.694	2.71915	8.51454e-07	2.83136	1.45769e-07
CDH4	578.663	2.52095	6.53031e-11	4.36368	2.27545e-27
CDK14	125.285	2.50304	0.00195882	2.69224	0.000458402
CDK6	108.619	2.57854	0.0257373	4.7159	4.39894e-05
CDON	163.763	2.95832	1.25619e-06	4.4679	2.14176e-12
CDS2	950.273	2.77839	1.75005e-10	3.20667	8.88705e-14
CECR2	961.231	2.51102	1.71723e-13	3.74715	1.12475e-27
CELF1	2802.89	6.83394	1.48998e-45	4.67925	4.0045e-30
CELF2	186.358	6.99153	6.4681e-18	4.35501	8.97394e-11
CELSR1	263.844	4.66196	4.47502e-14	4.82988	4.4729e-15
CELSR2	1344.09	3.87445	5.23195e-16	5.02718	6.13988e-23
CELSR3	468.564	3.26558	8.52843e-17	4.80177	8.83535e-30
CEP170B	476.344	2.01299	3.37845e-05	4.757	1.13527e-23
CEP85	198.902	2.5692	3.79023e-07	2.45633	8.56274e-07
CERS1	394.192	2.14019	8.9137e-06	2.14868	4.59268e-06
CES2	381.75	2.13626	0.000165866	2.46592	2.64975e-06
CGN	669.542	3.15141	3.91254e-12	3.34315	1.05686e-13
CHD3	394.683	2.51914	0.000618427	3.63009	3.48022e-07		yes
CHDH	318.766	3.58586	1.67951e-11	3.2368	3.90433e-10
CHPF2	302.524	2.24289	9.09702e-05	3.22569	1.58565e-09
CHRDL1	275.104	2.22474	0.000151653	3.08011	1.44408e-08
CHRNA4	66.374	2.29643	0.0480964	3.35932	0.00129146
CHST13	135.479	2.34774	0.0012149	2.22551	0.00179604
CHST3	259.343	2.2695	0.000538204	5.18689	2.63265e-14
CHSY1	276.483	2.69178	1.44419e-09	3.55446	1.01997e-15		yes
CIC	439.691	2.20786	7.84906e-06	3.15095	8.51075e-12
CIT	313.354	2.50218	8.58803e-06	3.99253	1.17633e-12
CKAP4	2277.57	2.37807	4.44668e-14	2.78948	6.69179e-20
CLASP1	476.251	2.0778	3.94194e-05	5.22699	5.64579e-24
CLCN4	125.399	2.35469	0.0482266	2.96147	0.00608472
CLCN5	131.557	2.18412	0.00613786	4.28091	1.26542e-08
CLDN19	351.895	3.19343	7.51973e-06	4.411	2.15649e-09
CLEC16A	182.687	2.28099	0.00494237	2.35962	0.00213312
CLSTN1	1605.35	2.11315	6.6625e-08	2.75832	2.66626e-14
CLTCL1	102.207	2.19153	0.0171216	4.1481	1.08355e-06
CMIP	338.827	7.38765	6.7883e-23	5.05995	1.42671e-15
CNNM4	173.37	2.41057	0.00147711	4.40486	5.06322e-09
CNOT6	278.694	2.09174	2.31685e-05	2.65449	3.78971e-09
CNTN2	98.0942	3.58108	0.000178711	6.11326	1.34917e-08
CNTROB	228.054	2.02287	0.00978049	2.55704	0.000189805
COL18A1	7433.87	2.3391	3.12869e-21	3.62618	1.01822e-48
COL1A1	1187.24	2.56962	1.83966e-20	4.48588	5.07236e-52
COL4A2	1808.51	2.04989	2.53707e-13	3.30976	1.27346e-36
COL4A6	502.83	2.20379	1.36849e-09	3.40942	8.48262e-23
COL5A1	154.551	2.37866	0.00236381	3.72083	5.55804e-07
COL6A1	1299.21	2.0038	4.59991e-11	3.16436	7.03002e-30
CORO2A	854.957	3.15481	2.46334e-09	3.36914	1.12614e-10
CPS1	84.711	3.05144	0.000217319	4.72659	3.74309e-08
CPXM2	127.784	2.96139	6.15009e-05	3.09406	1.6216e-05
CRAMP1L	192.751	2.61291	0.000911933	3.73446	1.17019e-06
CREB3L1	190.802	2.19628	0.00144304	2.14927	0.00134571
CREBBP	1783.73	3.07763	2.33039e-22	4.47562	5.76171e-40
CRIM1	99.4615	2.77161	0.00137822	3.60752	1.8327e-05
CRIPAK	67.0774	8.81725	9.6528e-05	9.18526	4.0759e-05
CRKL	558.104	2.72662	3.99689e-12	3.7255	7.06323e-21
CROCC	1165.29	2.30277	1.38902e-08	2.65516	7.88459e-12
CSMD2	147.614	3.06225	0.00117904	2.76445	0.00248022
CSPG4	224.433	2.58419	0.00168346	5.09125	4.22951e-09
CSPG5	50.6643	2.56307	0.030752	2.58343	0.0212804
CTC1	98.618	2.06537	0.0282093	2.63749	0.00128364
CTDP1	645.782	2.06129	1.1364e-05	2.8144	3.64527e-11
CTDSP1	121.525	2.4011	0.00056501	2.56309	0.000112083
CTNNB1	2029.74	2.41499	1.18094e-21	2.83984	1.21196e-30
CUX1	1075.02	4.75291	1.6128e-29	2.954	6.65668e-15
DAB2IP	706.353	2.13663	7.54125e-07	3.47583	1.13942e-17
DACT2	72.3988	4.90334	0.000129867	7.47912	3.14003e-07
DAG1	1771.31	2.08564	1.05758e-10	3.63536	3.22258e-32
DAPK1	500.483	2.21953	7.82829e-08	2.66827	7.43499e-12
DCAF6	71.0446	2.40824	0.0177988	4.56079	4.11305e-06
DCBLD2	925.441	2.7999	1.38347e-11	2.27224	6.70511e-08
DCHS1	877.773	2.92003	7.12391e-14	5.5308	3.95336e-35
DENND2A	123.881	2.16948	0.00490718	2.69021	0.000113087
DENND4B	619.313	2.5114	1.13842e-12	3.09577	3.35152e-19
DENND5A	398.863	2.23177	7.18371e-08	2.13133	2.45655e-07		yes
DEPDC5	134.771	2.34725	0.0108755	2.28769	0.00977565
DGCR11	57.1312	3.41642	0.0323617	4.35389	0.00551193
DGCR2	1518.21	2.25828	5.86058e-13	3.72915	1.88536e-33
DGKK	354.753	2.68797	3.75884e-07	3.24157	3.87406e-10
DHTKD1	1075.57	2.27251	1.33604e-11	2.88465	2.62094e-19
DIP2C	559.629	2.99095	8.67328e-11	4.03007	1.85769e-17
DIRAS1	342.567	2.38679	1.20957e-06	4.8242	8.94474e-21
DLGAP1	110.765	2.37981	0.00477377	2.40842	0.00276582
DMPK	338.419	2.13327	1.62426e-05	2.03281	3.81356e-05
DMWD	320.174	2.47192	4.26289e-06	2.16604	7.25238e-05
DNMT1	16429.4	2.02837	5.33068e-14	3.43743	5.96972e-42
DOCK1	242.815	2.16605	0.00208231	2.35554	0.000332254
DOCK4	117.764	2.41272	0.0217136	4.08149	4.45081e-05
DOCK6	402.276	2.49471	2.61489e-06	3.18837	5.02941e-10
DOT1L	757.709	2.58692	9.01386e-15	3.07156	8.16502e-21
DPY19L1	157.48	2.02844	0.00816518	2.27035	0.00107683
DRAM1	87.8508	3.31696	0.00184377	3.22402	0.00162931
DSTYK	727.822	3.93747	2.2159e-22	2.66555	4.61874e-12
DTX4	248.374	2.53886	0.000894819	4.56173	4.70792e-09
DUSP5	60.8898	2.4133	0.0184829	2.90291	0.00206122
DUSP7	137.585	3.3274	4.41003e-06	2.73907	0.000106124
DVL2	299.462	2.08698	0.00035902	2.52844	2.0003e-06
DYSF	88.4775	5.06188	1.03646e-05	12.0312	5.79306e-13
E2F3	828.447	4.9057	1.35978e-26	2.91426	1.11011e-12
ECE1	2103.57	2.02504	1.56254e-07	3.20157	1.11736e-19
EDA	149.076	2.45195	0.00566647	2.99464	0.00029599
EDEM1	219.315	2.21119	0.000449241	2.38008	6.3083e-05
EDEM3	149.485	3.00044	0.000548783	2.56952	0.00253013
EFNA2	297.856	3.76768	2.80136e-14	2.80551	3.62941e-09
EFNA5	142.987	2.29069	0.000594913	2.51332	6.45876e-05
EFNB1	325.779	2.22051	1.23919e-05	2.90385	8.29076e-10
EFR3B	174.42	2.63197	0.00795988	3.19703	0.000648969
EHD3	146.897	2.45944	0.0382389	4.58467	7.88144e-05
EIF4G1	8821.89	2.01998	4.22975e-14	3.51822	2.15522e-44
ELL2	72.4885	2.41182	0.0170224	3.02532	0.00112856
ELMSAN1	115.533	2.64629	0.000171262	3.06774	5.80926e-06
ENG	131.003	5.01028	1.14147e-10	6.93089	1.46199e-15
ENGASE	155.566	3.59282	0.000341985	5.55403	3.38143e-07
ENTPD6	1157.78	2.06726	7.2866e-13	2.31089	2.7104e-17
EP300	1187.17	2.08388	2.0819e-07	3.76883	4.22536e-23
EPB41L1	204.818	2.71023	1.57968e-05	2.14335	0.000975092
EPHB2	1085.17	2.26716	2.07221e-10	2.88631	2.13441e-17
EPHB4	1363.49	2.19943	1.05925e-11	2.81378	4.10638e-20
EPPK1	2073.31	3.1602	6.72914e-16	4.49218	3.90293e-27
ERBB2	12624.4	2.65195	1.21328e-40	3.61905	2.54635e-71
ERMP1	214.306	2.01704	0.000593359	3.99044	9.94684e-14
ERN1	74.8951	6.2614	7.67446e-05	7.05988	1.2415e-05
ESPL1	407.455	2.09826	0.00117158	3.29827	1.53457e-08
ESRP2	313.673	2.02105	0.0165197	2.1767	0.00470271
ETV6	215.723	2.05434	0.00127855	2.74281	1.28264e-06
EVC2	156.088	2.28356	0.00651775	4.19026	1.71316e-07
EXOC6B	98.7205	2.20192	0.0180071	2.67168	0.00140943
EXTL3	1895.87	2.29518	7.97102e-16	4.06422	9.04068e-45
FAM155B	220.259	2.08748	0.000765372	3.84493	1.70424e-11
FAM168A	246.168	2.85229	1.27799e-07	2.49209	3.41854e-06
FAM171A1	609.954	2.49849	2.2029e-14	3.49201	6.0494e-27
FAM179B	59.849	2.90431	0.00923736	4.47475	6.35071e-05
FAM189A1	146.621	2.48177	0.000164472	3.75954	4.30377e-09
FAM193A	278.012	2.04213	0.00968344	2.80712	4.44453e-05
FAM20C	909.484	2.01724	7.36067e-08	2.98167	1.66485e-18
FAM219A	116.998	3.11749	1.80569e-05	4.17217	1.57934e-08
FAM46A	120.889	2.36843	0.0188303	2.7169	0.00345433
FAM53B	231.261	2.53741	0.00116013	4.54677	1.00301e-08
FAM73A	57.9593	4.74497	0.000155296	2.77606	0.0153139
FAM83G	135.908	2.05064	0.00589912	2.84483	1.23954e-05
FAM83H	580.19	2.40164	5.33846e-09	3.79832	1.67407e-20
FAT1	926.369	3.57974	9.77383e-15	5.52971	1.56943e-26
FBN1	103.789	3.10747	0.00247463	9.30121	3.61294e-11
FBN2	322.195	2.75928	2.88633e-06	6.32923	1.19701e-19
FBN3	855.07	2.65466	2.84694e-12	3.99863	1.32002e-24
FBRS	141.74	2.35619	9.5814e-05	2.682	2.67065e-06
FBRSL1	624.736	2.1767	2.41263e-09	2.07212	1.43973e-08
FBXL18	538.805	2.17442	4.9057e-09	4.48515	6.21297e-33
FBXL19	1059.38	2.14928	1.34931e-09	3.52383	2.02463e-25
FBXO33	127.045	2.22425	0.00437286	2.61687	0.000255839
FBXO34	264.556	2.8357	6.13285e-07	2.03332	0.000821592
FBXW11	336.221	2.68576	4.54234e-09	2.90942	8.27269e-11
FEM1A	315.394	2.11662	0.000238596	2.27683	2.6436e-05
FEZF1	250.768	2.14285	2.75287e-06	2.0746	4.69423e-06
FGD1	255.621	2.27709	0.000356641	2.97442	5.17066e-07
FGFR1	13704.5	2.91602	2.30139e-31	2.91844	5.82445e-32
FGFR3	211.068	3.23199	1.52575e-09	3.45044	6.94726e-11
FICD	171.31	2.39132	0.000620179	3.00537	4.74075e-06
FIZ1	89.6117	2.42033	0.004093	2.28122	0.00563447
FJX1	302.303	2.94186	2.91119e-07	2.20112	0.000193981
FLNA	19756.3	2.13757	3.2158e-24	4.44843	4.62036e-93
FLNB	2518.3	2.42312	3.26133e-12	5.86425	1.11686e-47
FMNL3	245.17	2.17294	3.0451e-05	2.84234	3.15694e-09
FN1	371.148	3.38657	4.6421e-11	5.95299	1.63715e-23
FOXJ1	100.674	2.56902	0.000520837	2.59441	0.000283047
FOXJ2	56.2101	2.39109	0.0143574	3.34228	0.000197844
FOXK1	143.39	6.02335	1.52986e-08	9.10287	5.84533e-13
FOXN3	1216.3	2.49838	3.57042e-11	3.28916	7.66397e-19
FOXO3	185.653	2.47036	2.23196e-05	3.06107	3.89146e-08
FOXO3B	190.779	3.21769	1.14268e-05	3.30081	4.01007e-06
FRAS1	1235.53	2.70812	4.0367e-11	5.99574	3.56814e-35
FREM2	330.196	2.15259	0.00243825	5.05173	1.23069e-12
FUK	56.1706	2.92118	0.00512761	4.67566	1.11021e-05
FXR2	654.509	2.78504	5.40631e-11	3.38583	1.08479e-15
FYCO1	147.96	5.10207	2.11085e-07	4.77824	3.91271e-07
FZD5	608.857	2.55591	1.00964e-11	3.26383	1.12208e-18
FZD9	144.311	2.18548	0.026022	2.05651	0.0321592
GAK	736.123	2.43194	0.0142093	3.5501	0.000131934
GAS6	928.974	2.65459	8.85051e-13	2.2137	5.41819e-09
GAS7	66.1595	3.35578	0.000236764	4.91219	2.69827e-07
GATAD2A	977.928	2.08946	7.11638e-09	2.27089	3.76224e-11
GATAD2B	155.491	3.06205	4.91631e-06	4.16056	1.09832e-09
GATSL2	1056.8	2.36083	6.40705e-18	3.78921	3.05233e-43
GCN1	2378.02	2.2012	7.44582e-11	4.43045	1.38252e-37
GFPT1	483.356	2.33235	7.43511e-08	3.87647	1.47346e-19
GIGYF1	491.258	2.3613	7.59074e-10	2.49371	2.26999e-11
GIT1	837.426	2.11688	1.28264e-11	2.62247	3.22211e-19
GLDC	693.402	2.05856	1.16692e-08	3.07692	1.56602e-20
GLG1	5068.69	2.43702	2.6457e-18	3.84332	1.13039e-41
GLI2	1071.54	3.19394	3.02928e-20	4.52769	1.74139e-34
GLI3	306.616	3.62798	4.9084e-09	3.16991	1.184e-07
GLTSCR1	223.701	2.66273	4.32879e-07	2.52346	1.18492e-06
GMEB2	208.949	2.64655	0.000985997	2.68382	0.000519537
GNAO1	163.989	2.28154	0.000315087	3.54763	2.65924e-09
GOLGA2	727.891	2.98754	4.97355e-11	3.16181	1.81884e-12
GPAM	125.866	3.63144	1.19222e-05	3.50886	1.27709e-05
GRAMD4	357.449	3.65933	2.70371e-19	2.95061	6.69659e-14
GRM3	128.327	3.66011	3.03318e-08	3.73765	8.84396e-09
GRM4	166.402	4.63031	2.61718e-11	4.46634	3.9918e-11
GSE1	410.336	2.16904	2.64212e-05	2.7557	7.36092e-09
GTF3C1	2739.05	2.31102	1.77228e-16	4.3544	1.963e-50
GTPBP2	195.136	2.29889	0.000118745	2.48089	1.24309e-05
GXYLT1	260.017	2.19789	0.00784488	2.48333	0.00107429
H6PD	240.551	6.29812	2.01064e-21	7.36084	1.26701e-25
HAPLN4	269.429	2.10744	0.015886	2.6976	0.000473553
HCFC1	3500.65	4.10005	5.93511e-61	4.19566	4.58743e-64
HCG11	213.245	2.57356	8.57708e-05	2.75194	1.27709e-05
HCN4	464.308	2.51122	8.21941e-06	3.73563	1.77979e-11
HDAC7	532.76	2.79698	4.01226e-10	3.95473	5.39429e-18
HECTD4	337.949	3.66579	1.95667e-08	5.15382	2.10812e-13
HEG1	268.258	2.48286	3.42735e-05	4.09921	7.6315e-12
HELZ2	120.467	2.26088	0.00249812	2.20704	0.00234534
HERC1	342.389	3.7399	5.09962e-09	7.24615	5.30337e-20
HERC2	2558.36	3.19393	6.00089e-29	5.87789	9.46414e-68
HIC2	1388.17	2.30856	3.01008e-16	8.39945	1.98406e-105
HIF1AN	672.742	2.17032	1.08068e-09	5.11001	5.44676e-42
HIP1	1795.13	2.25906	1.85084e-16	3.05159	6.80966e-31
HIPK1	299.587	2.25456	5.52188e-05	3.05189	4.79698e-09
HIPK2	433.428	3.43625	7.2866e-13	3.66678	1.50384e-14
HIRA	487.776	2.18723	1.21898e-05	2.93656	2.37143e-10
HIVEP1	171.154	2.23784	0.00126771	2.29557	0.000536694
HIVEP2	50.0428	13.0223	7.60642e-07	9.35126	1.38735e-05
HLCS	99.5334	3.10761	3.62328e-05	4.07716	7.50325e-08
HMBOX1	121.468	2.24652	0.0491624	2.95292	0.00369906
HMCN1	66.6662	4.74432	0.000155005	8.32953	4.15767e-08
HMGXB3	309.359	3.97176	4.44989e-11	5.29656	2.66739e-16
HS3ST3B1	236.356	2.66077	4.21882e-06	3.47265	9.34366e-10
HS6ST1	693.485	2.17773	6.64339e-08	3.29509	4.49614e-18
HSPG2	336.68	3.7878	1.62674e-10	5.703	6.05845e-18
HTT	1409.2	2.14722	2.64266e-06	4.57713	2.5276e-23
HUNK	131.529	2.17925	0.0318007	2.61417	0.00402051
HUWE1	2455.07	2.71572	1.24272e-20	5.12171	3.95692e-55
HYAL1	53.5603	4.77365	0.000686815	3.87065	0.00278217
HYOU1	1819.45	2.2698	3.09273e-19	3.27147	2.52084e-40
ICAM1	71.2422	9.21391	6.48393e-09	10.9199	1.44785e-10
IER5	167.549	2.70857	2.94054e-05	2.47312	0.000110689
IFT122	190.876	2.27542	0.000203185	3.80146	7.64154e-11
IGDCC3	2709.82	2.58948	1.86734e-17	2.26153	2.23244e-13
IGDCC4	87.9655	3.82536	4.28343e-05	5.57548	3.30753e-08
IGF1R	1684.52	3.65352	5.41761e-26	6.66771	4.33747e-56
IGF2R	1116	3.48763	1.96585e-26	8.03683	2.24909e-74
IGLON5	544.488	2.11127	9.24215e-09	2.35054	1.39707e-11
IGSF3	826.453	2.89436	2.0558e-16	4.96937	2.0781e-37
IGSF9	588.481	2.08495	1.06e-06	2.89043	1.40159e-13
IGSF9B	142.475	3.34254	0.00018242	8.00809	2.91961e-12
IL17RA	459.254	2.5847	0.000356001	3.89837	4.87936e-08
IL4R	683.665	2.34595	2.10476e-11	2.40305	2.38648e-12
IL6R	52.036	3.65539	0.0256415	3.07031	0.0456561
INCENP	224.373	3.26325	8.02986e-07	3.74242	1.32666e-08
INPP4A	198.285	2.08957	0.0193015	2.41192	0.00258862
INPP5D	134.965	4.43579	6.01919e-07	5.73932	1.3157e-09
INPPL1	752.607	2.17223	4.81013e-11	2.83227	7.90884e-20
INSR	1143.37	3.45867	8.69538e-22	3.56941	2.55014e-23
INTS1	2186.77	2.45281	4.47672e-21	3.98263	4.45643e-50
IPW	819.798	2.60472	3.26133e-12	2.80861	1.80525e-14
IQSEC1	581.335	2.26798	1.89722e-07	3.28658	2.34918e-15
IRF2BPL	534.033	2.48127	2.3946e-12	2.92864	1.98079e-17
IRS1	205.126	2.77452	2.48672e-05	3.86981	3.92539e-09
IRS2	237.658	2.99218	1.14072e-06	4.08373	7.24488e-11
ITGA3	410.296	2.10774	1.75848e-05	3.47157	2.1222e-14
ITGB5	2303.17	2.28442	4.18547e-15	3.85929	4.83188e-40
ITPR3	710.847	2.8458	1.47256e-08	2.93193	2.61315e-09
JADE2	329.727	2.83845	0.000133396	4.73134	1.30801e-09
JAG1	208.665	2.99892	3.88944e-07	4.26924	2.50978e-12
JARID2	5137.55	2.89203	6.43408e-26	3.8714	2.13567e-42
KANK2	160.207	2.79618	1.19934e-05	5.51102	7.45938e-15
KAT6A	161.261	2.22823	0.00354747	3.36571	1.53126e-06
KAZN	140.439	2.97701	7.78189e-06	2.67078	4.38984e-05
KCNAB2	130.82	2.30725	0.00701428	4.18852	3.08913e-07
KCNC4	92.5678	2.28763	0.0386344	2.27404	0.0300853
KCNN3	109.734	2.35504	0.0458601	2.67414	0.0132258
KCTD11	66.7951	2.68115	0.00974812	3.8379	0.000122128
KCTD2	224.525	2.36772	0.00801537	3.05034	0.000216599
KDM2A	478.485	2.12829	4.83941e-06	2.72343	2.08467e-10
KDM3B	1345.9	2.09499	6.74389e-14	3.30352	4.90617e-36
KDM4A	419.668	2.24389	7.36519e-08	3.67838	6.83244e-20
KDM4B	640.615	2.75087	1.12455e-13	4.91325	9.69989e-34
KDM5C	1311.1	2.1189	3.3103e-08	2.61276	2.50156e-13
KDM6B	82.5722	3.29096	0.001138	2.21151	0.0331068
KIAA0100	3028.69	2.58498	3.73212e-27	3.86823	1.93713e-55
KIAA0226	394.046	3.73698	9.25174e-08	5.00557	1.42758e-11
KIAA0319L	1402.16	2.11529	1.28017e-13	3.13212	2.01348e-31
KIAA0355	170.303	2.92672	0.000258534	3.31684	2.02885e-05
KIAA1109	238.172	2.09035	0.00446289	3.02068	3.53548e-06
KIAA1467	549.425	2.27347	1.57867e-06	2.33359	3.71045e-07
KIAA1644	160.983	2.24639	0.000432151	3.48122	5.00069e-09
KIAA1804	383.273	3.51885	2.28658e-09	5.54489	3.15612e-17
KIAA2018	347.832	2.51086	1.45392e-06	2.37318	4.18781e-06
KIF1A	24653.1	3.1603	4.64451e-24	4.59444	2.06382e-42
KIF1B	792.729	2.0776	9.34953e-07	3.74585	6.23731e-21
KIF1C	2977.2	2.35707	6.2505e-27	2.96679	1.05963e-43
KIF20A	212.801	2.08649	0.00572672	2.73249	4.45153e-05
KIF21B	480.722	3.54668	9.23076e-14	3.65247	9.59162e-15
KIF26A	1147.54	2.18642	2.72202e-13	3.39134	3.59916e-32
KIF3C	333.114	2.96011	2.4794e-07	4.30232	4.61514e-13		yes
KIF7	374.397	2.42693	8.4456e-06	2.95041	1.44972e-08
KIFC1	1237.6	2.27869	8.47238e-12	2.40629	1.13638e-13
KIRREL	346.901	2.87389	1.86577e-06	4.69662	2.03025e-13
KIT	82.316	2.60381	0.00306588	2.40171	0.00523675
KLF13	331.351	3.35661	5.70648e-10	6.12412	4.19974e-22
KLHL3	211.131	2.23865	0.00446385	3.31448	4.30922e-06
KMT2A	2341.82	3.44582	1.6259e-16	3.16453	8.66829e-15
KMT2B	821.572	3.5278	3.01077e-17	4.52917	5.34081e-25
KMT2C	465.215	2.47587	1.21724e-06	2.82594	8.92493e-09
KMT2D	751.589	3.58959	4.60238e-17	4.44424	1.67774e-23		yes
KNDC1	187.807	2.11543	0.0264331	3.13373	0.00017226
KPNA6	2209.84	2.22789	2.09127e-15	3.36582	3.47843e-35
KPNB1	6047.13	2.00298	8.42978e-17	3.27363	1.48924e-48
KREMEN1	87.8454	5.98325	1.44431e-08	6.13994	4.33166e-09
KSR2	206.152	3.14657	2.00515e-05	3.68746	4.51783e-07
L1CAM	242.257	4.00838	8.08531e-14	3.45147	1.99337e-11
L3MBTL2	556.026	2.171	1.0725e-06	2.47651	3.44522e-09
LAMA5	1834.8	3.42847	1.49647e-25	4.73608	4.59741e-41
LAMC2	126.202	2.28533	0.00919475	3.09452	0.00010843
LAMC3	947.612	2.1509	1.38802e-07	3.01916	2.07691e-15
LARP1	6405.11	3.16261	1.26107e-41	3.76319	7.75685e-56
LARP4B	550.423	2.08385	0.000404446	2.27239	3.58653e-05
LATS2	99.4136	4.15936	5.74335e-07	8.06399	1.04195e-14
LDLR	2553.92	2.37114	2.04187e-12	4.02893	7.37183e-32
LGR4	417.397	2.14059	1.7177e-06	2.40979	1.03707e-08		yes
LHFPL4	774.103	2.6067	7.20727e-14	7.46023	7.27678e-61
LIFR	116.58	2.02269	0.0238443	3.40242	9.66444e-06
LIG3	609.874	2.00521	4.99935e-08	3.39504	5.21283e-24
LINC00657	1411.85	2.77162	2.08488e-21	2.71946	4.70672e-21
LINGO1	1103.27	2.32397	5.89106e-11	2.34416	1.72351e-11
LLGL1	80.8167	2.64954	0.00417441	2.57987	0.00378447
LMNB2	2920.54	2.34935	1.87989e-18	3.60782	1.38994e-41
LMTK2	486.19	3.16468	4.82003e-10	3.87479	5.43709e-14
LOC100130899	195.087	3.04666	4.07753e-07	5.22937	2.38987e-15
LOC100507373	77.6898	2.19178	0.0186511	2.43983	0.00415398
LOC642852	208.107	2.86606	5.40331e-07	2.66908	2.06497e-06
LONRF1	381.757	3.43599	3.91254e-12	4.67294	4.92519e-19
LPP	165.174	2.42278	0.000513539	3.81951	1.50377e-08
LRFN3	241.409	2.49385	4.53598e-06	2.8752	3.7658e-08
LRP1	4949.76	4.09168	8.34068e-45	7.11024	8.44343e-88
LRP4	174.535	2.06086	0.00224687	2.77344	3.37511e-06
LRP5	631.921	2.87167	1.5897e-08	3.14117	3.16839e-10
LRP6	762.174	2.04814	1.49581e-05	2.68976	3.23108e-10
LRP8	638.511	2.32856	8.45628e-10	3.15791	5.32111e-18
LRRC1	72.3354	2.53306	0.0221437	2.25911	0.0379309
LRRC4	84.7529	2.12736	0.0441239	2.55594	0.00627188
LRRC8A	3817.64	3.07677	1.86312e-16	2.42814	7.54997e-11
LZTS1	122.89	3.22201	5.01484e-06	5.76415	4.01193e-13
LZTS3	428.547	2.36786	1.32179e-08	2.42468	2.42895e-09
MADD	550.661	2.38272	3.13041e-07	4.22058	3.81976e-19
MAFG	885.228	3.00011	1.70432e-09	2.69165	3.94392e-08
MAN2C1	194.559	2.16105	0.0438931	2.23486	0.0250173
MAP1A	291.776	2.07189	0.00941322	5.03557	7.49855e-11
MAP3K1	59.8924	2.68885	0.00857995	3.32329	0.000607287
MAP3K6	140.18	2.50364	0.0315862	4.00956	0.000300731
MAP3K9	384.812	2.11615	0.00103993	3.88103	9.81375e-11
MAPK8IP3	1013.11	3.35888	1.62526e-12	7.81414	1.5542e-35
MAPKAPK2	200.647	2.36114	0.000150038	5.2311	1.81997e-15
MAPKBP1	116.748	2.40976	0.00117158	2.4128	0.00074689
MARCH8	115.056	2.02689	0.0101256	2.20692	0.00215621
MARK2	1303.37	2.76689	2.28816e-22	3.52347	1.44109e-34
MAST3	209.538	2.25164	0.0007389	2.70228	1.25722e-05
MBNL1	66.5062	3.58795	0.000111484	2.33995	0.0118607
MBP	233.301	2.68012	4.65958e-07	4.86651	1.16663e-17
MC1R	59.6728	3.14765	0.0206308	5.80339	7.96642e-05
MED13L	178.623	3.36802	1.1122e-07	4.21945	7.29803e-11
MEF2D	218.904	3.06455	4.63185e-08	5.46846	3.0222e-18
MEGF8	2464.57	2.77391	7.43685e-18	4.70489	4.93061e-41
MEX3B	69.5371	3.54549	0.00475627	6.10128	1.16109e-05
MEX3D	435.259	2.90398	4.22975e-14	2.16198	5.95273e-08
MFHAS1	297.828	2.53203	2.67732e-06	4.75779	5.52709e-17		yes
MGAT3	267.828	2.49882	0.000135006	3.2776	1.73737e-07
MGAT5	940.541	2.09471	1.39124e-09	7.01472	7.73314e-65
MGAT5B	59.5946	2.50119	0.0163722	2.36818	0.0185246
MGC27345	89.6692	3.05002	0.000484759	3.03137	0.000335037
MGRN1	182.387	2.13954	8.78108e-05	3.23323	8.67975e-11
MICAL3	491.645	3.07115	0.00662618	4.57948	7.05902e-05
MICALL2	65.6861	2.22299	0.0332533	2.74005	0.00336978
MIDN	800.064	3.05179	1.00426e-19	3.42942	2.05838e-24
MIR4697HG	743.901	4.69491	2.17274e-15	19.8242	3.39524e-57
MLLT4	1284.35	2.23554	2.27064e-05	2.69958	4.61696e-08
MLXIP	1307.82	3.3564	1.70272e-25	6.07365	4.95613e-57
MMP14	85.4372	3.29525	7.6987e-05	3.61328	9.71065e-06
MMP15	944.837	2.32082	4.73102e-11	3.05897	2.04023e-19
MN1	55.7024	6.21338	4.1141e-05	10.0559	4.7563e-08
MON1B	312.491	2.3064	0.000547058	2.00943	0.0034083
MORC2-AS1	292.827	2.52973	3.16687e-07	4.31199	2.04778e-17
MPRIP	717.104	2.09808	1.51857e-05	3.12198	1.97227e-12		yes
MRC2	504.335	2.27513	3.52511e-09	3.98888	1.72204e-25
MTF1	137.346	2.08341	0.0134094	3.49882	2.47235e-06
MTHFR	268.725	2.8911	8.9939e-07	4.4897	3.09708e-13
MTOR	1659.67	2.30562	3.34363e-13	4.14718	8.62382e-38
MVB12B	170.379	3.98334	7.93692e-09	7.36033	2.90485e-18
MVP	57.137	4.96779	7.67446e-05	5.47329	1.36697e-05
MXRA5	59.2005	3.30243	0.0394504	3.73295	0.0148743
MYADM	1191.52	2.56348	3.28689e-16	2.23655	2.34606e-12
MYBBP1A	404.172	2.07987	1.31581e-05	2.62452	1.67144e-09
MYH9	2743.95	2.58389	1.95696e-24	4.93243	2.87976e-69
MYLK	460.086	2.99741	6.72455e-09	4.44821	2.70547e-16
MYO18A	343.869	2.61027	0.000245399	3.66024	1.42195e-07
MYO1D	158.519	3.04488	0.00118899	9.25431	9.22945e-13
MYO9B	1220.86	2.49667	1.78927e-11	3.73602	1.39968e-23
MYRF	79.4183	3.32544	0.0341314	3.70295	0.0135796
NACC2	192.46	2.30797	0.00188149	5.46724	2.68393e-12
NATD1	93.3678	2.61336	0.00111428	4.57992	1.89611e-08
NAV2	588.665	4.06153	1.12409e-23	5.36799	1.7661e-34
NBEAL2	895.896	2.44585	8.23265e-06	3.39902	1.53475e-10
NCAN	116.361	2.09231	0.0120686	3.23545	9.59373e-06
NCAPD3	490.944	2.01938	1.37504e-07	2.76494	1.42632e-15
NCKAP5L	513.318	2.22973	1.22494e-07	2.78648	2.19755e-12
NCOA1	160.74	2.16356	0.0224241	2.14919	0.0171665
NCOA5	129.283	2.3768	0.00182807	2.04955	0.00876172
NCOA6	162.708	2.20754	0.0110901	2.06547	0.0157367
NCOR2	5573.01	3.78274	4.83711e-36	4.84518	2.99542e-51
NDST1	916.422	2.69266	8.71895e-15	4.04175	2.08467e-29
NEO1	614.455	2.35394	1.90083e-05	4.70865	1.3363e-16
NEURL4	347.9	2.28753	7.84873e-06	3.47497	1.10463e-12
NFATC3	277.098	2.41295	6.85214e-06	2.53602	9.63725e-07
NFE2L1	1902.8	2.26037	1.44111e-12	2.93239	7.87931e-22
NFKB1	89.357	3.32856	0.00243465	6.34248	3.98147e-07
NFRKB	589.757	2.50625	9.50197e-10	2.87823	4.86806e-13
NGFR	244.598	2.84464	0.00101048	3.92991	4.68757e-06
NHSL1	89.1637	2.92489	0.000424859	4.5554	9.43876e-08
NID1	92.0758	2.12145	0.0302693	4.03891	4.70953e-06
NINL	575.592	2.43106	1.9881e-07	2.39366	1.81342e-07
NKAIN1	449.58	2.01716	1.1898e-05	2.28461	8.00166e-08
NLGN2	1333.79	2.25575	7.13491e-07	3.06497	1.05091e-12
NLGN3	193.421	2.65281	1.71429e-05	3.03545	3.68128e-07
NLGN4X	3086.17	2.2298	2.58934e-13	2.57311	1.25733e-18
NLRX1	220.757	2.16394	0.00541733	3.31644	2.32187e-06
NOS1	115.101	2.82487	0.010702	4.26162	0.000101589
NOS1AP	458.502	2.02455	1.55627e-05	3.48508	2.88071e-16
NOTCH1	1469.77	3.0501	4.33997e-21	5.37581	4.02171e-48
NOTCH2	899.264	2.83943	5.41122e-16	6.41177	1.32634e-50
NOTCH3	4096.81	3.64062	6.66532e-23	3.87585	1.36662e-25
NPR1	458.053	2.12937	0.000290518	3.33359	5.65848e-10
NPTX1	152.693	2.70694	0.00244974	2.69073	0.00173174
NPTX2	424.41	2.40931	5.44156e-06	2.24022	2.18165e-05
NPTXR	140.508	2.52724	0.00606825	4.78642	3.11975e-07
NR1D2	94.8887	2.61704	0.0023829	4.23459	7.1989e-07
NR3C1	226.249	2.39368	0.000131268	3.47303	6.34404e-09
NR6A1	5179.12	3.18436	1.36371e-31	3.79775	2.06382e-42
NRDE2	246.601	2.22223	7.15593e-05	3.5302	1.86269e-11
NRP2	860.889	2.17731	3.61298e-08	3.55903	4.25707e-21
NRXN2	218.708	2.37274	0.000294289	2.68374	1.4832e-05
NUP210	1580.11	2.8906	7.6076e-14	3.83755	2.79767e-22
NUPL1	90.6216	3.37534	0.000234653	2.6475	0.00304159
NXPH3	103.794	15.7181	8.41448e-14	16.793	8.15969e-15
OBSCN	752.283	3.36155	7.41532e-13	3.91744	1.61001e-16
OLFML2B	124.974	3.18981	0.00155078	3.39454	0.000495066
ORAI2	1779.45	2.01874	1.03619e-09	2.05048	1.95848e-10
OSBP	425.88	2.61341	1.08155e-06	2.42107	5.10793e-06
OTUD7B	74.1479	2.56872	0.00598595	4.45663	1.58199e-06
OXSR1	494.302	2.22668	1.16013e-07	3.0481	1.32291e-14
P3H2	198.885	2.65134	4.65994e-05	2.65125	2.78746e-05
PACS1	159.209	2.29769	0.00513088	2.50294	0.00110858
PALD1	542.865	3.52813	3.07553e-14	4.4235	5.10076e-20
PAQR4	1472.64	2.17056	6.94697e-12	2.09832	2.99783e-11
PARM1	50.3028	3.5552	0.00358427	2.87252	0.0138215
PCNXL2	288.044	2.02957	5.34799e-05	2.17999	3.86442e-06
PCNXL3	227.473	3.41475	9.87222e-08	4.0135	5.03509e-10
PEAK1	227.91	2.07096	0.00804278	2.8837	2.61149e-05
PEG10	962.312	3.01582	6.73575e-09	3.51764	1.13228e-11
PER1	429.304	2.7382	4.73794e-12	3.56626	2.71628e-19
PHF2	107.426	3.28206	0.0150945	3.47895	0.00689978
PHF21B	92.4694	2.40294	0.0133811	2.6105	0.00397166
PHLPP1	424.885	2.46509	4.79287e-06	3.83591	6.44257e-13
PHRF1	1466.68	2.42567	6.88715e-12	3.68541	1.69656e-25
PIEZO1	953.902	2.8256	7.18008e-08	3.24305	3.27437e-10
PIEZO2	222.097	2.02386	0.000494742	2.04549	0.000249603
PIGQ	585.08	2.10375	0.000441147	2.11183	0.000256928
PIK3R1	71.1579	3.56312	0.000186413	2.62801	0.00455586
PIK3R5	69.4457	2.37627	0.0110901	3.75816	1.71393e-05
PIKFYVE	325.07	2.33283	3.79211e-05	3.42612	2.13021e-10
PIP4K2B	739.708	3.16169	2.69791e-13	5.03326	3.84689e-26
PIP5K1C	563.846	2.59771	5.86253e-08	2.51315	9.62348e-08
PITPNM3	124.017	2.79862	0.00873265	4.23702	6.20431e-05
PKD1	491.183	2.61693	5.07842e-08	2.90161	5.46147e-10
PKD1P1	58.1677	3.31466	0.000632155	2.2462	0.0236566
PKD2	233.312	2.18165	0.000623769	2.62637	7.60614e-06
PKP4	482.813	2.19202	2.33993e-09	2.31513	6.24348e-11
PLAG1	91.6783	5.27997	3.75413e-08	3.15195	0.000189814
PLCB3	863.409	2.75327	7.0898e-25	2.8062	2.90389e-26
PLCG1	776.162	2.19988	7.38855e-08	2.67443	3.48664e-12
PLEC	5069.86	3.91075	4.60483e-25	6.07052	4.68976e-44
PLEKHA6	198.752	2.9395	0.00086799	5.11207	5.79196e-08
PLEKHG5	171.274	2.74243	0.00498544	3.28519	0.000426798
PLEKHH1	94.1991	2.15462	0.0285929	4.1495	3.93364e-06
PLXNA1	3025.96	3.88487	4.83711e-36	5.08642	2.30604e-52
PLXNA3	106.257	3.83061	2.83102e-05	3.57838	4.82113e-05
PLXNB1	2512.43	2.23834	4.37618e-07	4.28324	6.73043e-22
PLXNB2	2712.55	3.33934	3.35024e-35	3.60379	2.36712e-40
PLXND1	451.114	4.14543	9.99712e-23	5.2902	1.26029e-31
PMEPA1	620.21	2.24479	1.38312e-07	2.11688	6.93235e-07
PNMAL2	82.5262	2.6745	0.0099902	4.50114	1.40384e-05
PODXL	14744.1	2.40725	2.66459e-18	3.08502	3.46976e-30
POFUT1	419.94	2.14797	3.0541e-06	3.09019	3.90197e-13
POGZ	245.951	2.17462	0.0191811	2.5782	0.002046
POLE	565.501	2.02971	1.01579e-05	3.19435	1.4278e-14
POLG	672.109	2.29566	2.3584e-09	2.97748	4.85251e-16
POLR1A	456.739	2.44389	2.50702e-05	3.74678	4.25261e-11
POLR2A	2736.55	2.31146	4.46718e-21	3.7994	1.63967e-53
POM121C	325.694	2.59107	8.43452e-09	2.8763	5.20223e-11
POU2F1	954.074	3.6226	1.60216e-12	3.04683	7.24481e-10
POU3F1	506.42	3.4439	5.53454e-09	2.70864	2.44612e-06
PPARA	74.6581	4.56197	8.45276e-07	4.99656	7.88633e-08
PPARGC1B	162.229	2.89083	0.00106381	3.68571	2.04822e-05
PPL	356.865	2.11821	0.00381199	3.29229	5.46684e-07
PPM1H	262.884	2.96704	1.5231e-05	4.6332	1.22653e-10
PPP1R16B	136.349	2.52311	0.00948863	4.18953	9.92202e-06
PPP1R26	668.169	2.63496	4.95631e-14	4.19285	1.06443e-30
PPP1R3B	138.427	2.36175	0.01248	2.9867	0.000578026
PPP1R9B	97.9794	2.1707	0.0431618	4.06133	3.07527e-05
PPP6R2	762.415	2.28905	9.65368e-07	2.72512	7.68512e-10
PREX1	148.504	3.04658	3.03044e-06	2.97313	3.04525e-06
PRKCA	107.196	2.10548	0.0123502	2.34943	0.00213831
PRKCD	256.823	2.68025	1.98049e-06	2.4838	8.166e-06
PRKX	1305.71	2.02762	1.4055e-09	5.07116	7.06757e-49
PRPF8	3079.14	2.45625	2.60851e-12	5.0295	5.72688e-39
PRR12	555.784	3.68033	1.00798e-22	5.78513	9.75482e-42
PRR14L	868.862	2.0599	4.12245e-08	2.83045	1.75639e-16
PRRC2A	2587.3	3.06715	2.35913e-28	4.31531	1.18639e-48
PRRC2B	2128.99	2.86417	3.9488e-17	4.64652	1.93774e-36
PSD3	152.334	2.09145	0.0375471	2.37361	0.00846254
PTGFRN	283.664	2.26453	0.000425795	3.3175	3.14069e-08
PTK7	725.08	2.5052	8.38984e-19	2.56394	3.80852e-20
PTPN13	566.285	2.24148	1.57004e-05	2.80932	7.11256e-09
PTPN21	69.8462	3.61241	0.00225386	3.8758	0.000744143
PTPRF	6757.57	2.85127	2.33774e-28	3.94558	5.5704e-49
PTPRJ	413.196	3.04936	1.97693e-10	3.75434	8.52568e-15
PTPRS	2855.58	4.53138	5.12508e-59	4.87745	6.31775e-66
PTPRT	90.3957	2.54182	0.0394968	3.47573	0.00249604
PTPRU	804.53	2.39321	9.62166e-06	2.56786	7.75967e-07
PVRL1	2286.43	2.42841	3.99571e-18	4.72788	2.33918e-55
PXDN	4243.75	2.22773	7.42872e-15	3.70204	2.94497e-39
PYGL	291.561	2.11529	0.00974989	2.28766	0.00242649
PYGO2	142.61	2.56992	0.00050741	2.80579	7.25639e-05
QRICH2	72.9825	3.02641	0.00205114	3.74484	9.64338e-05
QSOX2	495.182	2.09782	0.000357725	5.38724	5.8919e-19
RAB11FIP1	654.099	2.1564	3.02216e-08	3.5716	5.32792e-22
RAB11FIP3	667.018	2.22563	1.20876e-10	2.84699	3.65538e-18
RAB11FIP4	1088.01	2.18947	8.92538e-12	2.83297	9.5255e-21
RAB40C	435.605	2.98716	1.62254e-09	2.67134	4.37054e-08
RAD54L2	646.459	2.78573	4.65013e-13	5.41966	2.54655e-35
RADIL	150.882	2.46913	0.00246011	2.41988	0.00211488
RALGAPA2	183.716	2.03479	0.00439215	3.15429	4.3658e-07
RAP1GAP	105.646	4.07718	0.00012337	4.01619	9.12533e-05
RAP1GAP2	291.115	2.59871	0.000105071	3.0259	2.60513e-06
RAP2A	186.907	2.54251	1.00773e-05	2.95408	9.69481e-08
RAPGEF5	54.2363	2.57357	0.043504	2.55041	0.0344241
RASD2	57.5474	3.97954	0.00221997	3.49115	0.00445923
RBM15B	1102.43	2.0434	1.28311e-06	2.41773	5.15226e-10
RBM47	550.676	2.353	7.94074e-08	2.13492	1.48218e-06
RC3H1	116.821	2.58989	0.0040823	2.29567	0.0101562
RECQL5	203.922	2.09249	0.00060855	2.72041	7.22803e-07
RERE	724.781	2.13831	9.92695e-09	3.15274	1.5898e-19
REXO1	1745.55	3.10044	3.07523e-17	2.96668	2.352e-16
RGMA	395.624	2.38378	8.09666e-07	2.72383	3.98695e-09
RGMB	123.371	3.09765	4.73395e-06	2.80096	2.2982e-05
RGS12	403.447	2.17581	5.21103e-05	3.22952	8.58232e-11
RHBDF2	269.846	2.38259	1.19934e-05	2.80114	6.26191e-08
RHOBTB2	356.588	2.73764	1.52642e-07	3.81597	3.52055e-13
RIMS3	600.567	2.18209	1.13917e-05	3.72146	3.79311e-15
RIMS4	353.453	2.69345	3.1235e-08	5.17063	4.30338e-22
RNF145	5270.73	2.08381	2.26416e-07	2.2383	5.09913e-09
RNF157	239.409	2.4393	2.51118e-06	3.33313	2.57654e-11
RNF213	1784.43	3.36262	1.05272e-16	5.16766	1.11568e-30
RNF216	971.421	2.03984	1.20492e-06	2.52861	4.60483e-11
RNF38	81.8822	2.15476	0.0149047	3.54149	7.28271e-06
RNFT2	400.698	2.02392	3.68697e-07	2.66577	1.35007e-13
ROBO1	606.23	3.19917	3.15647e-14	3.54054	4.15024e-17
ROR1	2549.86	2.4739	3.77802e-09	2.57562	3.11669e-10
RPTOR	341.575	2.07553	0.000380606	4.42546	2.52024e-15
RREB1	284.984	2.63531	2.63151e-08	3.4054	2.87606e-13
RUSC2	130.143	2.16029	0.0243913	2.38195	0.00652705
S1PR3	95.8394	2.62604	0.00280326	3.1352	0.000172574
S1PR5	209.535	2.23039	0.00135667	2.01248	0.00435098
SALL4	830.297	2.20884	1.76728e-05	3.81779	1.15082e-14
SAMD1	196.31	2.28336	0.000514312	2.28294	0.000327719
SASH1	255.264	2.41205	0.000118375	3.24852	4.94225e-08
SBF1	1194.23	2.35636	5.89312e-10	2.92567	1.32992e-15
SBK1	1755.73	2.77236	2.79727e-13	3.1692	3.39605e-17
SBNO1	1204	2.63934	8.85051e-13	2.37765	1.22653e-10
SCARA3	228.749	2.06873	0.000230515	3.15191	3.84181e-10
SCARF2	302.862	2.08204	0.00158527	2.20026	0.000378799
SCN4A	157.279	3.59753	4.22093e-07	5.2357	8.79397e-12
SCN8A	115.722	3.98571	6.99947e-05	4.71198	3.42692e-06
SCRIB	1301.3	2.76806	5.2026e-24	4.09388	2.08732e-46
SCUBE1	193.21	3.96622	6.96714e-10	2.68929	1.1793e-05
SDC3	421.145	3.95312	3.00325e-11	4.10243	3.66296e-12
SDK1	154.024	3.92011	1.87749e-07	5.65555	5.99148e-12
SDK2	190.102	3.43548	4.96977e-06	4.32937	1.68283e-08
SEC16A	735.485	2.22576	2.84465e-07	4.28861	5.11499e-23
SEC24A	84.7891	2.12757	0.0165083	3.4299	1.21264e-05
SEC24D	186.6	2.13122	0.00140978	2.70762	7.25161e-06
SEL1L3	709.148	2.04694	1.55158e-09	3.30211	5.40911e-26
SEMA3G	77.1264	2.87489	0.00303774	3.50245	0.000183988
SEMA4B	665.228	2.47189	5.57466e-07	2.72546	1.09759e-08
SEMA4C	612.385	2.97521	3.58714e-14	2.68084	4.83176e-12
SEMA4D	847.325	3.35188	5.00505e-22	3.73459	1.5941e-26
SEMA5A	189.798	2.19822	6.82061e-05	4.22463	2.76257e-15
SEMA6A	2705.2	2.3276	3.29942e-19	3.22111	6.7013e-37
SEMA6B	835.748	2.35877	1.37823e-10	4.78525	1.59714e-34
SEMA6D	78.3923	3.13991	0.000461018	6.10537	1.92116e-09
SEPN1	1754.94	2.57115	1.40977e-21	2.37864	1.21514e-18
SEPT9	4923.13	2.10452	7.31339e-23	3.80526	1.11418e-73
SETD1A	516.862	3.63605	4.01321e-19	4.67644	1.26616e-27
SETD1B	215.331	4.89392	3.25292e-12	4.64643	8.55215e-12
SETD8	59.2042	2.63238	0.00699383	2.08912	0.0390997
SGK223	304.4	2.06133	4.61896e-06	3.22049	3.36644e-15
SGPL1	595.435	2.20414	1.02004e-08	3.57783	3.65257e-22
SGSH	211.884	2.95016	1.68994e-05	3.23001	1.41121e-06
SH2D5	303.387	2.36735	1.18085e-06	3.59679	2.94e-14
SH3PXD2A	258.643	2.1099	0.017613	3.19738	4.32857e-05
SH3PXD2B	484.555	2.21209	0.00023485	3.57026	2.46406e-10
SHANK2	250.797	2.3289	0.000523901	3.59752	1.6787e-08
SHROOM2	153.776	2.16507	0.00914497	4.81167	2.27579e-09
SHROOM3	460.259	2.5127	4.90541e-07	4.91675	3.69864e-20
SIK3	219.247	2.87696	5.63215e-05	2.97597	1.75252e-05
SIMC1	91.6929	2.12819	0.0120687	2.80854	0.000177833
SIN3A	484.902	2.33605	6.82602e-09	3.62211	4.0156e-20
SIPA1L2	63.9539	4.54899	0.00988149	5.60787	0.00173657
SIPA1L3	197.506	2.56754	0.000411582	2.49875	0.000405013
SKI	272.067	3.98979	4.6482e-14	4.99278	3.09367e-19
SLC12A7	613.965	2.01002	7.51221e-07	2.86555	4.48227e-15
SLC22A23	542.225	3.06577	3.60028e-18	4.34277	1.61983e-31
SLC23A2	215.52	3.04478	1.26995e-05	4.26015	2.48984e-09
SLC24A3	71.139	2.69931	0.0046779	5.31826	1.34582e-07
SLC26A2	100.408	3.23028	9.63394e-05	4.1136	7.75034e-07
SLC35E2	106.82	2.11648	0.00504708	2.30684	0.000941637
SLC35E2B	169.004	2.02662	0.000549596	2.27387	2.41275e-05
SLC45A4	494.415	2.82301	6.62625e-09	3.94501	1.82004e-15
SLC4A11	404.003	2.46343	6.12849e-07	3.35666	2.6701e-12
SLC4A3	129.739	4.04677	6.71129e-07	4.06839	3.33902e-07
SLC6A9	254.296	2.45134	0.000450971	2.37883	0.000474778
SLC7A1	893.84	2.78826	2.11429e-15	4.71301	3.65437e-35
SLC7A11	350.797	2.11574	0.000200306	3.45145	3.69514e-11
SLC7A5	3979.97	2.08638	5.19572e-22	2.65582	5.25694e-39
SLC7A8	1065.34	2.22502	2.67986e-10	2.53906	4.33226e-14
SLC9A6	74.7982	4.15825	8.90372e-05	4.30816	3.33501e-05
SLX4	266.464	2.76059	4.99492e-08	3.99671	8.42292e-15
SMAD7	242.766	2.03959	0.000196952	2.80164	9.07903e-09
SMARCA4	18747.2	2.34173	5.5439e-24	3.5501	3.49048e-53
SMCR8	138.558	2.39103	0.00488417	4.98336	8.38316e-09
SMURF1	185.066	2.13711	0.00502489	3.77699	5.80474e-08
SNAPC4	429.331	2.01198	9.12157e-08	2.33956	1.70346e-11
SNPH	94.3119	3.25474	0.000696807	3.5678	0.000136521
SNRNP200	3856.93	2.13322	5.22422e-13	4.3464	6.37898e-48
SOBP	103.59	3.83039	6.21248e-07	2.63919	0.000372485
SOCS7	490.81	2.72901	3.87136e-13	4.77818	7.47115e-32
SOGA1	187.211	2.98183	2.52002e-06	4.63428	3.58893e-12
SORBS1	308.775	2.12231	6.02297e-06	2.53855	4.90748e-09
SORCS1	58.3609	4.63848	0.000898476	8.83884	3.90983e-07
SORL1	1793.61	2.71524	1.49842e-12	5.71475	1.42772e-37
SOX4	10844.3	2.31836	4.25316e-14	3.03655	1.47904e-24
SOX8	96.4719	3.16826	1.76952e-05	3.98678	7.33553e-08
SP1	293.433	2.15969	3.92911e-05	6.09802	4.28741e-26
SPATA13	211.529	2.16722	0.00197465	2.50634	9.99867e-05
SPEN	964.889	2.32529	8.49284e-11	3.03486	1.30915e-18
SPIRE2	212.508	2.76869	4.00624e-06	2.15621	0.00052215
SPOCK1	113.58	2.63861	0.00144304	2.35862	0.00397181
SPRY4	1222.38	2.08434	4.65013e-13	3.10443	7.58656e-31
SPTAN1	2717.51	2.19699	1.5354e-15	4.11166	1.28534e-49
SPTBN1	3593.85	2.23104	4.35059e-19	4.17806	2.56156e-60
SPTBN2	1318.5	2.45163	1.39124e-09	5.22293	1.41835e-31
SRCAP	873.24	3.03072	2.65894e-17	3.82561	1.43418e-25
SREBF1	1297.68	2.96039	5.8628e-15	3.61341	3.75818e-21
SREBF2	2255.71	2.02404	4.46123e-12	2.74674	1.40569e-24
SRGAP1	188.203	2.0491	0.00126065	2.54899	7.28271e-06
SRGAP2	393.913	2.02348	0.000391709	3.16772	4.03257e-10
SRRM1	12712.3	2.34966	3.06746e-12	2.38274	5.68024e-13
SRRM2	33679.4	2.99055	8.01396e-19	3.29052	1.40369e-22
STIM1	122.902	2.82632	0.000277988	5.91805	1.43073e-11
STK10	299.4	2.6587	3.2198e-05	4.11605	1.85148e-10
STOX2	270.847	2.56783	1.2888e-06	3.13197	1.1342e-09
STX1B	84.6612	2.41845	0.0283598	7.94143	2.11912e-09
SUSD6	59.022	2.87876	0.0037709	3.90061	6.13398e-05
SV2A	910.715	2.52004	2.09129e-11	3.86797	3.36078e-24
SYNGAP1	104.368	2.51661	0.00213798	2.09209	0.0131293
SYT12	111.792	3.30774	2.82093e-05	5.09633	1.63298e-09
SYT2	890.89	3.16372	2.69499e-11	11.2859	5.5704e-49
SYT7	309.336	2.61194	5.68811e-06	3.56959	2.8544e-10
TAF4	100.018	2.53919	0.000726439	2.64141	0.000249123
TAF4B	84.2866	2.54168	0.00266907	2.25643	0.00736448
TAOK2	536.131	2.07819	1.15965e-07	2.85517	1.88045e-15
TBC1D16	3042.55	2.46764	6.23961e-18	4.31297	9.58305e-47
TBL1X	1281.45	2.09818	7.9821e-06	2.73073	2.16918e-10
TCERG1L	96.6038	3.08261	0.00985575	2.37694	0.0443841
TCF20	535.09	2.61642	1.85858e-06	2.71374	3.7081e-07
TCF4	979.451	2.69759	2.45527e-13	2.55396	2.59018e-12
TEAD1	371.398	2.74543	1.03022e-06	2.54026	4.58305e-06
TEK	161.014	2.65855	0.0119869	3.77474	0.00020254
TENM3	914.468	3.13836	1.70429e-15	3.89005	4.69085e-22
TENM4	314.163	3.50927	4.98432e-11	6.02963	1.65792e-22
TET3	120.973	3.75103	2.07967e-07	3.43713	8.50795e-07
TGFBR3	65.119	4.63432	0.000109856	5.6292	5.34876e-06
TGFBRAP1	278.203	2.05273	8.49344e-06	2.48739	3.51131e-09
THRIL	68.7262	2.68691	0.00331616	3.51342	6.25014e-05
TIAM1	235.685	2.76385	0.000355898	3.49561	3.5917e-06
TLE1	1152.24	2.38405	2.43062e-11	3.29717	2.95105e-21
TLE3	653.749	2.1748	1.60673e-05	3.43659	3.56999e-13
TLE4	244.678	2.90509	2.4237e-07	3.19332	7.26671e-09
TLN1	3374.71	2.13643	1.30784e-15	3.94456	1.93519e-50
TLN2	712.731	2.16307	4.31045e-06	4.49607	1.16419e-21
TMCC1	76.8922	2.45645	0.0445084	2.56575	0.0246682
TMEM130	60.2698	2.36276	0.0197422	3.36726	0.000283484
TMEM132B	489.688	2.39997	1.20412e-07	2.85347	5.42571e-11
TMEM132D	111.868	3.50695	0.000365825	5.98983	5.3533e-08
TMEM151B	267.641	2.05469	0.00733982	3.08078	4.3918e-06
TMEM178B	334.658	2.63723	5.80646e-07	7.31332	5.25565e-28
TMEM2	311.877	2.95909	3.05736e-09	4.2118	3.57523e-16
TMEM265	155.825	2.73105	7.3425e-05	3.07281	3.9483e-06
TMEM30B	110.748	3.92479	6.06019e-06	9.24311	3.73202e-15
TMEM44	251.478	2.31623	0.000138551	2.00487	0.00141331
TMEM63B	265.95	2.37586	1.3303e-06	2.25745	3.70184e-06
TNFRSF1B	50.4118	13.1066	2.71782e-07	10.1107	2.9185e-06
TNFRSF21	622.774	2.45795	2.56733e-09	6.37581	1.71564e-38		yes
TNFRSF8	514.808	2.15253	9.93257e-05	3.4727	1.33888e-11
TNK2	318.421	2.26318	3.44353e-05	2.53564	9.11255e-07
TNPO2	355.379	2.43828	7.93692e-09	2.15802	5.25164e-07
TNRC6A	2236.05	5.53836	7.25992e-33	2.34708	5.71612e-09
TNRC6B	888.852	4.48954	1.63135e-14	3.6993	1.62047e-11
TNRC6C	708.396	5.63126	1.74546e-23	4.38505	1.01777e-17
TNS3	154.983	3.08106	3.29743e-05	7.32943	2.39413e-15
TP73	87.93	2.93738	0.00625022	4.24376	7.2993e-05
TRABD2A	66.5411	2.01986	0.0464777	2.18695	0.0170649
TRAF3	159.086	2.29576	0.032715	2.73616	0.00506372
TRAK1	318.846	2.40621	4.04213e-06	2.71056	5.81525e-08
TRANK1	57.2308	3.78625	0.0131481	7.47009	3.5167e-05
TRERF1	246.588	2.86713	1.3518e-05	3.99526	1.87033e-09
TRIB1	187.353	3.54461	2.48564e-05	3.28785	5.05937e-05
TRIM56	440.552	2.08874	2.28632e-06	2.74312	1.13341e-11
TRIM62	107.454	2.14255	0.0303283	2.50634	0.00466895
TRIM71	889.226	4.94677	8.52635e-30	4.66311	3.79324e-28		yes
TRIO	216.613	2.76122	8.02529e-08	3.999	1.95578e-14
TRPM7	381.366	2.35592	1.86463e-05	2.39371	7.26195e-06
TRRAP	606.326	4.03518	6.47793e-16	5.97352	2.90214e-26
TSPAN18	143.452	2.115	0.00174107	3.5005	9.97604e-09
TTC28	117.09	2.03674	0.0143431	2.9208	4.59151e-05
TTLL5	122.255	2.28853	0.00123611	3.3308	4.07161e-07
TTYH3	2834	2.97701	4.59486e-23	2.80713	3.78175e-21
TUB	115.895	3.23286	0.000165866	4.09011	2.0164e-06
TULP1	140.536	2.02615	0.00532339	2.12803	0.00169177
UBN2	101.111	2.65307	0.0228163	2.86916	0.00877738
UBQLN4	228.185	2.14052	0.000532594	3.08017	3.90661e-08
UBR4	3547.85	2.68757	3.21876e-22	4.69466	2.24707e-54
UBTF	2327.4	2.14736	8.93916e-22	3.19454	1.92277e-50
UHRF1	87.3785	2.11482	0.0294479	3.37237	7.26064e-05
ULK1	602.524	2.06946	3.00565e-06	2.6476	5.94542e-11
UNC13A	851.69	2.3763	1.853e-11	3.82949	2.93495e-27
UNC5B	2005.97	4.75895	2.48351e-26	9.9891	1.35263e-57
UPF1	887.964	2.24819	4.03343e-15	4.17212	5.39278e-47
USP19	553.309	2.00795	1.30502e-05	3.82243	2.49078e-19
USP2	72.1949	2.64024	0.00390743	2.05131	0.032834
USP22	3174.38	2.25978	2.97427e-23	3.81318	8.00605e-63
USP31	279.504	2.65737	2.09269e-08	2.95187	1.7535e-10
USP36	619.355	2.15005	8.50534e-05	2.51523	7.02761e-07
VANGL2	454.44	3.04572	3.30935e-17	2.27294	6.54826e-10
VAV2	245.135	6.67664	6.42154e-22	7.15914	5.55923e-24
VGLL4	298.77	2.17415	3.97674e-05	2.09777	5.97886e-05
VIPR1	85.8604	2.3112	0.0249701	2.91433	0.00180859
VPRBP	167.517	2.12434	0.0305909	3.35325	0.000104083
VPS13C	153.602	2.3087	0.00920575	2.4161	0.00374846
VPS13D	331.434	3.24894	1.1401e-10	6.27219	1.09071e-25
VPS39	389.504	2.24254	8.70402e-07	4.25015	7.42044e-21
VWA8	76.9577	2.39432	0.0149089	2.82242	0.00183378
WBP1L	316.739	2.00935	0.015611	2.61368	0.000276643
WHSC1	1628.14	2.18261	2.79416e-10	3.03996	1.36095e-20
WIZ	277.83	2.23143	0.00489671	2.59358	0.00037678
WNK1	792.481	2.11142	1.3143e-06	2.65894	4.11986e-11		yes
WNK2	877.529	2.64758	6.19091e-07	4.03637	7.88283e-14
WWC1	469.742	2.88541	7.05014e-08	3.48593	5.34722e-11		yes
WWP2	509.392	2.4709	3.35307e-09	4.82495	3.14585e-27
XKR6	83.5846	2.61651	0.0252287	4.47148	0.000103015
XPO6	1065.22	2.03743	3.64684e-09	3.27435	8.28589e-25		yes
XYLT1	360.559	2.30467	0.00256416	2.9742	2.56739e-05
XYLT2	623.856	2.32012	8.02371e-08	3.41829	2.55589e-16
YEATS2	1339.12	2.93919	1.67735e-14	2.79977	1.19318e-13
ZBED1	1762.11	2.26711	1.79316e-11	2.31251	2.45008e-12
ZBTB34	459.437	4.91259	3.91399e-22	3.14415	4.80441e-12
ZBTB39	116.617	3.61122	1.07111e-06	4.3609	6.8193e-09
ZBTB42	65.1723	9.66757	2.34656e-06	26.6375	5.03524e-13
ZBTB7A	1645.93	6.20601	5.95787e-28	3.29856	1.18003e-12
ZC3H12A	357.989	2.25791	4.03585e-07	2.25533	2.30712e-07
ZC3H3	393.465	2.27557	5.65462e-06	3.601	6.91686e-14
ZC3H4	488.253	2.86374	2.68789e-08	4.21577	2.56506e-15
ZCCHC14	154.64	2.12856	0.0139572	2.54782	0.00101433
ZDHHC11	80.5479	6.86408	9.54494e-08	7.28063	1.78608e-08
ZDHHC18	647.708	2.60288	2.92533e-08	7.93624	2.98101e-37
ZFHX2	670.173	2.57148	1.00085e-08	2.84248	7.6948e-11
ZFP36L2	1104.82	2.01795	1.49144e-10	2.43783	5.51731e-17
ZFP41	458.218	2.73232	5.5206e-06	3.31674	1.72707e-08
ZFYVE26	182.696	2.25138	0.0030494	3.62445	2.88578e-07
ZHX2	143.826	2.54992	0.000396751	2.79153	5.01327e-05
ZHX3	60.8339	16.4469	5.95288e-09	28.2686	7.01287e-13
ZIC2	1623.45	2.30619	3.36446e-18	2.90636	7.50199e-30
ZMAT3	71.7331	3.98589	0.000302511	4.39725	5.61288e-05
ZMIZ1	342.417	3.09899	9.115e-09	3.90992	8.62858e-13
ZMYND8	2911.15	2.34466	5.58573e-16	2.21451	2.35588e-14
ZNF148	360.428	2.59675	0.000306316	2.56702	0.000231125
ZNF185	130.899	2.63306	0.00779182	2.70966	0.00398699
ZNF236	82.3065	3.45838	0.000135362	2.82878	0.00122554
ZNF318	187.474	2.45807	0.000652918	2.98834	1.18329e-05
ZNF324	70.1644	3.58962	0.0167139	5.37922	0.000596182
ZNF335	200.291	2.31403	4.67642e-05	3.697	1.17801e-11
ZNF367	64.3866	5.34452	1.24449e-06	2.69016	0.00592578
ZNF423	3239.92	3.19206	1.07992e-26	3.0826	1.26262e-25
ZNF445	142.883	2.53364	0.000232354	3.34707	3.95996e-07
ZNF462	1061.96	3.68355	2.19771e-17	5.68265	5.47107e-31		yes
ZNF469	59.531	21.1994	9.69344e-09	22.0576	2.99561e-09
ZNF483	213.535	5.77715	1.42783e-10	4.3797	5.78055e-08
ZNF512B	474.833	2.93884	1.48621e-09	3.13577	5.62835e-11
ZNF532	452.984	2.31529	3.7456e-07	2.30136	2.53141e-07
ZNF574	520.452	2.32719	2.5456e-09	2.96491	2.13209e-15
ZNF592	331.93	2.08771	0.000927677	2.41437	2.88166e-05
ZNF609	607.932	2.71723	2.06555e-09	3.52648	6.04944e-15
ZNF618	623.772	3.26524	4.01321e-19	3.7312	5.08828e-24
ZNF629	1082.73	4.28816	2.25717e-22	3.22443	4.77828e-15
ZNF652	172.923	2.37251	0.000294196	3.22341	1.79492e-07
ZNF670	57.6937	6.4946	1.45621e-06	5.34717	1.26269e-05
ZNF710	128.3	2.4238	0.00724341	3.34898	7.0587e-05
ZNF740	180.483	2.23977	0.000290601	6.30619	4.74444e-20
ZNF805	151.403	2.88018	0.0018033	2.00184	0.0438979
ZNF827	976.783	4.20385	2.55791e-22	2.81852	3.00139e-12
ZNFX1	245.988	3.14184	4.45476e-08	4.2662	6.08389e-13
ZSWIM4	133.319	2.12555	0.0305909	2.50348	0.00432957
ZSWIM6	90.6872	3.15087	0.00010669	3.04654	0.000111076
ZSWIM8	138.067	2.26656	0.00276711	4.16058	9.27852e-09
ZZEF1	223.701	2.64667	1.97448e-06	5.17659	1.22835e-17

## Sheet: Normalized Results
	Normalized Counts									CS_vs_total					MBL_vs_total
	1_CS	1_MBL	1_total	2_CS	2_MBL	2_total	3_CS	3_MBL	3_total	BaseMean	log2FoldChange	Ratio	pvalue	padj	BaseMean	log2FoldChange	Ratio	pvalue	padj
A1BG	327.111	153.214	758.589	230.913	207.919	803.818	235.006	191.315	823.51	414.599	-1.58752	0.332743	5.78736e-15	1.3367e-13	414.599	-2.11236	0.231269	1.09549e-24	2.10459e-23
A1BG-AS1	1.52499	7.85714	8.8502	2.61411	12.1754	0	10.2922	6.05976	4.30406	5.96422	0.130029	1.09432	0.926625	0.959352	5.96422	0.987249	1.9824	0.478713	0.591957
A2M-AS1	0	1.57143	2.52863	0	2.80971	7.51231	7.71919	0	0	2.46014	-0.388809	0.76376	0.875278	0.930925	2.46014	-1.2066	0.433288	0.631329	0.726892
A2ML1	52.6122	51.0714	40.4581	27.0125	29.9703	12.5205	22.2999	32.8958	12.9122	31.3059	0.627783	1.54519	0.346091	0.516561	31.3059	0.787738	1.72637	0.236471	0.343227
A4GALT	384.298	487.928	236.427	391.245	443.935	286.72	366.233	451.019	394.539	382.483	0.317611	1.24626	0.131239	0.259934	382.483	0.594237	1.50967	0.00464575	0.0122513
AAAS	504.01	584.571	514.576	421.743	669.649	460.755	430.559	700.335	516.487	533.632	-0.136379	0.909799	0.41178	0.579126	533.632	0.389725	1.31014	0.0182411	0.0413018
AACS	328.636	803.786	274.356	314.564	591.913	187.808	319.917	675.23	380.192	430.711	0.195951	1.14548	0.415136	0.582244	430.711	1.30076	2.46359	4.94375e-08	2.73461e-07
AACSP1	1.52499	14.1429	0	0.87137	0	2.5041	0	0	0	2.11592	-0.0713312	0.951759	0.981161	0.991782	2.11592	2.48597	5.60209	0.394804	0.51002
AADAT	65.5746	30.6428	72.0659	100.208	7.49257	73.8711	99.4917	19.9106	139.165	67.6024	-0.102487	0.931426	0.834848	0.904716	67.6024	-2.28314	0.20545	9.48787e-06	4.02342e-05
AAED1	128.099	47.9286	177.004	62.7386	15.9217	151.498	105.496	19.0449	193.683	100.157	-0.815678	0.568142	0.0564214	0.136469	100.157	-2.64483	0.159892	2.90606e-09	1.81436e-08
AAGAB	349.223	396.786	654.915	351.162	322.181	568.432	384.244	437.168	424.667	432.086	-0.604751	0.657585	0.00348696	0.0136466	432.086	-0.511955	0.701271	0.0133553	0.0314157
AAK1	205.111	478.5	155.511	287.552	490.764	225.369	351.652	558.363	121.948	319.419	0.74416	1.675	0.0055643	0.0203028	319.419	1.60046	3.0324	1.98464e-09	1.2611e-08
AAMDC	524.597	369.286	1022.83	491.452	383.058	942.795	519.759	358.391	988.499	622.296	-0.9435	0.51997	1.57272e-11	2.50614e-10	622.296	-1.4114	0.375946	2.27759e-23	4.01447e-22
AAMP	5214.71	4421.21	3473.07	4992.08	5314.11	3448.15	4874.24	3730.21	2966.93	4270.52	0.608794	1.52498	6.32772e-06	4.63929e-05	4270.52	0.445187	1.36149	0.000966711	0.00292935
AANAT	12.9624	2.35714	11.3788	18.2988	6.556	0	9.43456	5.19408	14.3469	8.94763	0.668305	1.58921	0.565457	0.709897	8.94763	-0.866453	0.548494	0.469851	0.583517
AAR2	371.335	542.143	414.695	423.486	353.087	548.399	479.447	374.839	439.014	438.494	-0.138697	0.908339	0.524918	0.675753	438.494	-0.141914	0.906316	0.515596	0.625499
AARD	142.587	168.929	207.348	123.734	96.4669	187.808	162.103	132.449	226.68	160.9	-0.536728	0.689333	0.0599843	0.143212	160.9	-0.641135	0.641208	0.0250686	0.0542438
AARS	2091.53	4345	1612	1893.49	3820.28	1760.39	1628.75	4713.62	1545.16	2601.13	0.191014	1.14157	0.15096	0.287763	2601.13	1.38884	2.61868	9.38986e-26	1.91109e-24
AARS2	850.183	1424.5	614.457	962.863	1288.72	666.092	993.202	1249.18	645.609	966.089	0.542576	1.45657	6.79233e-05	0.000404417	966.089	1.04091	2.05752	1.64328e-14	1.59809e-13
AASDH	169.274	135.143	146.66	130.705	140.486	171.531	154.384	211.226	98.9934	150.934	0.121305	1.08772	0.698006	0.809785	150.934	0.220168	1.16487	0.481024	0.593933
AASDHPPT	234.849	210.571	379.294	232.656	162.963	479.536	194.695	114.27	401.712	267.838	-0.928685	0.525337	0.000221629	0.00117495	267.838	-1.36843	0.387313	6.7993e-08	3.71107e-07
AASS	2651.96	2714.64	2438.86	3383.53	2469.74	3024.96	3303.81	3172.72	2751.73	2879.11	0.184788	1.13665	0.193732	0.34224	2879.11	0.0247105	1.01728	0.862132	0.907493
AATBC	9.91245	6.28571	0	3.48548	5.61943	2.5041	25.7306	16.4479	15.7815	9.52969	1.11457	2.16531	0.385487	0.555838	9.52969	0.650357	1.56956	0.614631	0.712707
AATF	932.532	1069.36	1199.83	1165.89	1295.28	1879.33	891.995	923.68	1922.48	1253.38	-0.741946	0.597932	0.000149356	0.000819874	1253.38	-0.605033	0.657456	0.00197704	0.00563375
AATK	110.562	90.3571	74.5945	108.921	65.56	7.51231	97.7764	78.7768	104.732	82.088	0.767845	1.70272	0.187526	0.33403	82.088	0.333497	1.26006	0.56829	0.673019
ABALON	32.7873	51.8571	29.0792	46.1826	65.56	47.578	54.892	82.2395	12.9122	47.0098	0.570886	1.48544	0.291323	0.457065	47.0098	1.14844	2.21674	0.0325847	0.0678728
ABAT	99.887	121.786	67.0087	108.921	88.9743	41.3177	112.357	109.941	34.4325	87.1806	1.16528	2.24277	0.00172519	0.00733474	87.1806	1.16468	2.24183	0.00174884	0.00504203
ABCA1	79.2996	172.071	22.7577	94.1079	197.617	42.5698	125.222	229.405	35.8672	110.991	1.56105	2.95068	2.17933e-05	0.000144512	110.991	2.56625	5.92268	1.75274e-12	1.45796e-11
ABCA11P	49.5622	24.3571	93.5593	34.8548	36.5263	57.5944	27.446	10.3882	43.0406	41.9254	-0.79576	0.57604	0.164009	0.304382	41.9254	-1.45073	0.365835	0.0124182	0.029443
ABCA2	291.273	486.357	101.145	387.76	332.483	167.775	338.787	593.856	130.556	314.444	1.34844	2.54636	6.41665e-07	5.55378e-06	314.444	1.82234	3.53655	1.50354e-11	1.14524e-10
ABCA3	414.798	567.286	222.519	502.78	635.932	154.002	459.72	470.93	291.241	413.245	1.04703	2.06628	8.59445e-06	6.16917e-05	413.245	1.32872	2.51179	1.54693e-08	8.98912e-08
ABCA4	0	5.5	0	8.7137	0	0	5.14612	0	0	2.15109	6.57588	95.3976	0.0832443	0.184838	2.15109	5.25498	38.1863	0.169208	0.263507
ABCA5	16.0124	14.1429	5.05726	50.5394	16.8583	56.3424	37.7382	26.8361	34.4325	28.6622	0.120265	1.08693	0.876702	0.931708	28.6622	-0.729092	0.603283	0.352642	0.46779
ABCA7	684.721	766.071	580.32	651.785	578.801	775.02	577.224	796.425	639.87	672.249	-0.0601927	0.959136	0.739959	0.841187	672.249	0.102246	1.07344	0.572515	0.67701
ABCB1	0.762496	3.92857	5.05726	11.3278	4.68286	11.2685	6.00381	30.2988	0	8.14778	0.132259	1.09601	0.925657	0.958893	8.14778	1.24206	2.36537	0.374893	0.490631
ABCB10	69.3871	90.3571	72.0659	67.0955	51.5114	12.5205	76.3342	48.478	8.60812	55.1509	1.18573	2.27478	0.0681832	0.158171	55.1509	1.02601	2.03638	0.115094	0.193669
ABCB4	1.52499	14.9286	45.5153	4.35685	0.936572	0	24.0152	7.79111	1.43469	11.167	-0.655983	0.634643	0.662057	0.783444	11.167	-0.986654	0.504647	0.51258	0.622922
ABCB6	538.322	786.5	294.585	421.743	976.844	604.741	339.644	784.306	375.888	569.175	0.0274197	1.01919	0.913704	0.952806	569.175	0.997616	1.9967	7.42798e-05	0.000274563
ABCB7	212.736	286.786	326.193	217.842	145.169	146.49	135.515	233.733	120.514	202.775	-0.0686868	0.953506	0.856159	0.918311	202.775	0.165887	1.12186	0.661151	0.751962
ABCB8	380.485	708.714	503.197	430.457	731.462	399.405	350.794	567.886	487.793	506.688	-0.258934	0.835705	0.160616	0.29979	506.688	0.530695	1.44463	0.00372088	0.0100114
ABCB9	31.2623	73.8571	84.7091	60.1245	69.3063	3.75616	94.3456	73.5828	12.9122	55.984	0.869405	1.82691	0.247899	0.408568	55.984	1.09319	2.13345	0.14589	0.234041
ABCC1	657.271	1287.79	337.572	735.436	956.24	279.208	894.568	1327.09	414.624	765.532	1.15046	2.21985	8.29737e-09	9.52864e-08	765.532	1.7938	3.46727	1.9999e-19	2.81338e-18
ABCC10	184.524	228.643	61.9514	241.369	254.747	182.8	168.107	191.315	100.428	179.321	0.78156	1.71899	0.0267042	0.0748	179.321	0.965422	1.95263	0.00614709	0.0157459
ABCC2	9.14995	0	0	1.74274	5.61943	0	2.57306	13.8509	5.73875	4.2972	1.2645	2.40245	0.521783	0.673473	4.2972	1.78988	3.45787	0.362334	0.477948
ABCC3	10.6749	4.71428	16.4361	5.22822	0	31.3013	6.8615	0	10.0428	9.47324	-1.34337	0.3941	0.251394	0.412963	9.47324	-3.5702	0.0841906	0.00564339	0.0145852
ABCC4	83.8745	278.929	79.6518	112.407	154.534	67.6108	86.6264	212.091	70.2996	127.336	0.377656	1.29923	0.254137	0.416429	127.336	1.57017	2.9694	1.47214e-06	6.92884e-06
ABCC5	349.223	432.928	163.097	359.876	461.73	185.304	333.64	476.124	200.856	329.197	0.926318	1.90042	1.13426e-06	9.41592e-06	329.197	1.32071	2.4979	3.11458e-12	2.5419e-11
ABCC6	17.5374	29.0714	16.4361	16.556	27.1606	7.51231	21.4422	45.881	24.3897	22.8874	0.207841	1.15496	0.761195	0.855687	22.8874	1.08694	2.12422	0.106772	0.182049
ABCC8	21.3499	40.8571	3.79294	36.5975	4.68286	10.0164	41.169	12.9852	17.2162	20.963	1.68332	3.21165	0.055568	0.13494	20.963	0.930876	1.90643	0.293797	0.40553
ABCD1	57.1872	83.2857	27.8149	79.2946	101.15	62.6026	59.1804	109.941	11.4775	65.7704	0.932379	1.90842	0.0721867	0.16506	65.7704	1.52188	2.87165	0.0031804	0.00867932
ABCD3	123.524	238.857	391.937	124.606	100.213	257.923	97.7764	116.867	189.379	182.342	-1.27943	0.411958	0.000454196	0.00224033	182.342	-0.878916	0.543776	0.015587	0.0359506
ABCD4	969.895	664.714	700.43	979.42	517.924	684.873	896.283	608.573	834.987	761.9	0.358854	1.28241	0.021339	0.0622751	761.9	-0.308151	0.807676	0.0498963	0.0971059
ABCE1	448.348	593.214	739.624	380.789	398.979	622.27	412.548	597.319	479.185	519.142	-0.568814	0.674171	0.00822036	0.0281868	519.142	-0.212098	0.863281	0.323016	0.43749
ABCF1	6363.03	9084.43	5922.05	5878.26	9276.74	5587.91	7389.83	10206.4	6078.77	7309.71	0.158544	1.11616	0.156327	0.294478	7309.71	0.699777	1.62425	3.77641e-10	2.57156e-09
ABCF2	751.821	1397	925.478	950.664	1181.95	812.582	837.103	1292.46	611.176	973.36	0.111019	1.07999	0.521466	0.673289	973.36	0.719838	1.647	3.02077e-05	0.000118843
ABCF3	777.746	801.428	668.822	682.282	891.616	605.993	596.95	708.126	519.356	694.702	0.196818	1.14617	0.254557	0.41662	694.702	0.41937	1.33734	0.0150391	0.0348287
ABCG1	24.3999	31.4286	29.0792	30.4979	39.336	17.5287	30.8767	39.8213	18.6509	29.0688	0.391249	1.31153	0.487553	0.645193	29.0688	0.75793	1.69106	0.175992	0.271704
ABCG2	2.28749	0.785714	24.022	0	14.0486	51.3341	6.8615	6.05976	0	11.711	-3.04549	0.12112	0.0368364	0.0973133	11.711	-1.85973	0.275528	0.191321	0.29054
ABCG4	22.8749	54.2143	13.9075	30.4979	24.3509	15.0246	17.1537	7.79111	11.4775	21.9214	0.80117	1.74251	0.308362	0.476509	21.9214	1.09697	2.13904	0.161803	0.254044
ABHD1	6.86246	5.5	16.4361	5.22822	0	2.5041	11.1499	0.865679	7.17343	6.1911	-0.169337	0.889251	0.900187	0.944889	6.1911	-2.00955	0.248351	0.157877	0.248924
ABHD10	169.274	104.5	255.391	154.232	39.336	373.112	127.795	57.1348	121.948	155.858	-0.734828	0.60089	0.0743737	0.16898	155.858	-1.89815	0.268287	5.5822e-06	2.43629e-05
ABHD11	635.922	477.714	944.443	550.706	568.499	876.437	695.584	487.378	645.609	653.588	-0.390831	0.76269	0.03286	0.0885584	653.588	-0.686949	0.621166	0.000186646	0.000645103
ABHD12	2937.13	1774.14	1355.34	2148.8	1669.91	1575.08	2720.58	1732.22	1507.86	1935.67	0.814937	1.75922	3.2986e-09	4.00335e-08	1935.67	0.222063	1.1664	0.108107	0.183773
ABHD12B	14.4874	11	1.26431	8.7137	0.936572	0	3.43075	8.65679	0	5.38773	4.36088	20.5474	0.0291465	0.0804087	5.38773	3.99288	15.9212	0.0463802	0.0915083
ABHD13	80.8246	48.7143	118.846	51.4108	63.6869	155.254	84.0534	64.926	96.124	84.8711	-0.776008	0.583981	0.0362501	0.0960111	84.8711	-1.06515	0.477922	0.00434188	0.0115109
ABHD14A	252.386	104.5	386.88	221.328	141.422	459.503	235.006	150.628	446.187	266.427	-0.866346	0.548534	6.95021e-05	0.000411582	266.427	-1.70663	0.306376	1.73477e-14	1.6813e-13
ABHD14B	77.7746	44	94.8236	58.3818	44.9554	22.5369	78.0496	63.1946	109.036	65.8614	-0.0767208	0.94821	0.882126	0.934419	65.8614	-0.570743	0.67327	0.273324	0.383124
ABHD15	28.2123	14.1429	13.9075	20.9129	38.3994	12.5205	30.8767	89.165	8.60812	28.5273	1.18739	2.27741	0.109707	0.227678	28.5273	2.0105	4.02921	0.0063244	0.0161498
ABHD16A	769.358	468.286	407.109	777.262	533.846	797.557	578.081	669.17	550.92	616.843	0.275137	1.21011	0.247361	0.407845	616.843	-0.0714767	0.951663	0.76431	0.834766
ABHD16B	73.9621	44.7857	75.8589	43.5685	35.5897	21.2849	54.892	23.3733	34.4325	45.3053	0.389819	1.31023	0.486866	0.644803	45.3053	-0.342888	0.788462	0.545416	0.651654
ABHD17A	1481.53	770	1237.76	1420.33	1146.36	1130.6	1221.35	810.276	1345.74	1173.77	0.151165	1.11047	0.373466	0.544389	1173.77	-0.446375	0.733885	0.00886471	0.0218332
ABHD17B	202.061	296.214	190.911	190.83	317.498	191.564	190.407	315.973	71.7343	218.577	0.357061	1.28081	0.257661	0.420487	218.577	1.02931	2.04104	0.0010377	0.00312831
ABHD17C	103.699	175.214	61.9514	77.5519	48.7017	11.2685	90.9149	94.3591	53.0834	79.6383	1.1105	2.15921	0.049362	0.122789	79.6383	1.33779	2.52764	0.0177698	0.0403848
ABHD2	350.748	833.643	164.361	488.838	701.492	185.304	529.193	974.755	305.588	503.769	1.06545	2.09282	2.06064e-05	0.000137195	503.769	1.9409	3.83945	6.63505e-15	6.66138e-14
ABHD3	104.462	86.4286	64.48	111.535	55.2577	146.49	104.638	71.8514	172.162	101.923	-0.255071	0.837946	0.512122	0.665572	101.923	-0.839414	0.558871	0.0326603	0.0679785
ABHD4	295.848	236.5	149.189	339.834	259.43	251.663	238.437	370.511	107.601	249.89	0.779058	1.71601	0.0126572	0.0402527	249.89	0.766169	1.70075	0.0142527	0.0332131
ABHD5	166.224	173.643	217.462	103.693	119.881	187.808	103.78	148.031	110.471	147.888	-0.465245	0.724348	0.168471	0.30999	147.888	-0.225026	0.85558	0.504318	0.615428
ABHD6	127.337	87.2143	217.462	168.174	204.173	107.676	107.211	103.016	298.415	157.853	-0.629419	0.646437	0.120639	0.244173	157.853	-0.661318	0.6323	0.103219	0.177296
ABHD8	457.498	650.571	302.171	537.635	672.458	629.782	519.759	558.363	486.359	534.955	0.0948144	1.06793	0.683224	0.798969	534.955	0.407604	1.32648	0.0788647	0.142067
ABI1	133.437	124.143	123.903	104.564	123.627	165.271	148.38	90.0307	114.775	125.348	-0.0652195	0.9558	0.832932	0.903533	125.348	-0.259316	0.835484	0.403686	0.519007
ABI2	619.909	702.428	649.858	494.938	590.977	569.684	628.685	792.097	701.562	638.904	-0.139041	0.908123	0.433901	0.599421	638.904	0.119387	1.08627	0.500748	0.611979
ABI3	43.4623	25.9286	94.8236	35.7262	90.8474	90.1478	61.7535	18.1793	70.2996	59.0187	-0.857839	0.551778	0.130816	0.259345	59.0187	-0.925127	0.526634	0.103805	0.178099
ABI3BP	3.04998	4.71428	0	0	0	25.041	0	0	0	3.64503	-3.02301	0.123022	0.270797	0.43476	3.64503	-2.39864	0.189644	0.376393	0.49223
ABL1	642.784	1191.93	283.206	668.341	956.24	269.191	654.415	990.337	271.156	658.622	1.25474	2.38624	2.41281e-15	5.8523e-14	658.622	1.93048	3.81183	1.5291e-34	4.90176e-33
ABL2	375.91	591.643	117.581	394.73	449.554	122.701	507.751	586.931	101.863	360.963	1.89933	3.73039	1.86024e-17	5.42404e-16	360.963	2.24914	4.75399	5.90635e-24	1.07683e-22
ABLIM1	361.423	1906.14	293.321	433.942	1418.91	305.501	389.39	1733.96	295.545	793.125	0.404912	1.32401	0.015599	0.0481196	793.125	2.50013	5.65738	2.10231e-52	1.45263e-50
ABLIM2	57.1872	47.9286	7.58589	46.1826	29.0337	91.3998	54.0343	72.7171	24.3897	47.8288	0.34892	1.27361	0.614324	0.746513	47.8288	0.276795	1.2115	0.689652	0.775369
ABLIM3	12.9624	3.14286	0	13.0705	0	0	7.71919	1.73136	0	4.29182	7.86234	232.702	0.00967679	0.0322005	4.29182	5.09002	34.0602	0.0994883	0.172043
ABO	5.33747	15.7143	0	8.7137	0	0	0	0	0	3.30727	6.59776	96.8555	0.0667779	0.155642	3.30727	6.76392	108.679	0.06011	0.113422
ABR	732.759	984.5	257.92	766.805	985.273	371.86	736.753	1382.49	199.421	713.087	1.42883	2.69228	6.25722e-11	9.38013e-10	713.087	2.01286	4.03583	2.64095e-20	3.90211e-19
ABRACL	1783.48	833.643	4925.77	1609.42	1107.03	4989.43	1660.48	889.053	4740.2	2504.28	-1.536	0.344839	2.3077e-34	2.63542e-32	2504.28	-2.37367	0.192954	3.52759e-78	6.10644e-76
ABT1	1582.94	768.428	1580.39	1548.42	1062.07	1416.07	1419.47	896.844	1575.29	1316.66	-0.00639234	0.995579	0.964503	0.981858	1316.66	-0.745962	0.59627	2.488e-07	1.28261e-06
ABTB1	71.6746	78.5714	132.753	44.4399	70.2429	40.0657	50.6036	75.3141	32.9978	66.2959	-0.305506	0.809158	0.559248	0.705008	66.2959	0.120344	1.08699	0.817296	0.87516
ABTB2	47.2747	108.429	8.8502	83.6515	94.5937	10.0164	66.8996	93.4934	28.6937	60.2113	2.07394	4.21036	6.05548e-05	0.00036437	60.2113	2.6596	6.31856	2.35013e-07	1.2142e-06
ACAA1	1063.68	1049.71	1386.95	1168.51	1155.73	1626.42	869.695	1084.7	1143.44	1172.09	-0.422884	0.745932	0.00955271	0.0318456	1172.09	-0.338069	0.7911	0.0382393	0.0776639
ACAA2	2029.76	2221.21	2878.84	1831.62	3027	2812.11	1556.7	2196.23	2315.58	2318.78	-0.563454	0.67668	0.000389697	0.00194789	2318.78	-0.105501	0.929482	0.505948	0.617026
ACACA	1364.87	3732.93	773.76	1379.38	2627.08	846.387	1334.56	3888.63	582.483	1836.68	0.887825	1.85038	2.61816e-07	2.40535e-06	1836.68	2.2172	4.6499	3.80149e-38	1.43384e-36
ACACB	138.774	212.929	104.938	170.788	157.344	28.7972	151.811	213.823	116.21	143.935	0.887551	1.85003	0.0281977	0.0781316	143.935	1.22859	2.34337	0.00233425	0.00654839
ACAD10	182.999	308.786	61.9514	146.39	268.796	50.0821	182.687	157.554	123.383	164.736	1.12743	2.18469	0.00220378	0.00912646	164.736	1.64912	3.13641	7.01264e-06	3.02526e-05
ACAD11	0	0	0	0	0	0	0	7.79111	0	0.865679	0	1	1	1	0.865679	5.74682	53.6989	0.210294	0.312801
ACAD8	526.885	351.214	389.409	411.286	519.797	465.763	482.02	270.958	256.809	408.238	0.351843	1.27619	0.18925	0.336237	408.238	0.0362424	1.02544	0.892695	0.930446
ACAD9	422.423	507.571	501.933	413.901	633.122	295.484	393.679	480.452	506.444	461.668	-0.0830602	0.944053	0.709121	0.818064	461.668	0.314767	1.24381	0.156213	0.246893
ACADM	541.372	254.571	445.039	490.581	210.729	406.917	456.29	312.51	393.104	390.124	0.25736	1.19529	0.191881	0.339936	390.124	-0.678327	0.624889	0.000698494	0.00217758
ACADS	227.224	224.714	152.982	211.743	252.874	276.704	248.729	289.137	418.928	255.893	-0.301304	0.811518	0.327866	0.497946	255.893	-0.14462	0.904617	0.63832	0.732879
ACADSB	103.699	96.6428	101.145	111.535	57.1309	58.8465	90.0572	59.7319	51.6487	81.1598	0.52617	1.4401	0.189533	0.336558	81.1598	0.0127458	1.00887	0.974859	0.98753
ACADVL	2051.11	1327.86	1515.91	2013.74	1578.12	1623.91	1913.5	1454.34	1058.8	1615.25	0.509053	1.42312	0.00129106	0.00568292	1615.25	0.0534652	1.03775	0.736002	0.813848
ACAN	6.09997	46.3571	3.79294	13.0705	37.4629	2.5041	16.2961	68.3887	4.30406	22.0307	1.74507	3.35211	0.0406451	0.10561	22.0307	3.8522	14.442	3.50178e-06	1.56359e-05
ACAP1	260.774	343.357	159.304	261.411	311.878	484.544	235.006	395.615	317.066	307.662	-0.343848	0.787937	0.269505	0.433115	307.662	0.129031	1.09356	0.677709	0.76487
ACAP2	421.66	632.5	436.188	609.959	698.682	295.484	693.011	893.381	604.003	587.208	0.369698	1.29208	0.149904	0.286348	587.208	0.737296	1.66705	0.00402969	0.0107709
ACAP3	318.723	318.214	104.938	291.037	177.949	133.97	247.014	521.139	235.289	260.919	0.85626	1.81034	0.0186587	0.0559217	260.919	1.10426	2.14989	0.00239353	0.00670213
ACAT1	362.948	249.071	702.959	440.913	245.382	604.741	402.255	152.36	499.271	406.656	-0.584183	0.667027	0.00961491	0.032014	406.656	-1.48262	0.357838	8.76735e-11	6.28231e-10
ACAT2	3600.51	2591.29	8860.31	3198.8	4196.78	7994.35	3016.49	2423.04	8315.44	4910.78	-1.35847	0.389995	4.59239e-15	1.07275e-13	4910.78	-1.45055	0.365883	5.95087e-17	6.95043e-16
ACBD3	480.372	1081.93	484.232	462.697	923.46	399.405	578.939	1213.68	505.01	681.081	0.132899	1.09649	0.452115	0.615075	681.081	1.21396	2.31973	4.13238e-12	3.3345e-11
ACBD4	166.987	94.2857	91.0306	63.61	169.519	65.1067	84.0534	92.6277	212.334	115.506	-0.223082	0.856733	0.6434	0.769343	115.506	-0.0460503	0.968584	0.923792	0.953063
ACBD5	96.0745	108.429	64.48	80.166	46.8286	116.441	90.9149	65.7916	54.5181	80.4048	0.180157	1.13301	0.677881	0.795019	80.4048	-0.0904365	0.939239	0.835539	0.888314
ACBD6	1814.74	1664.14	2735.98	1578.92	1883.45	2613.03	1448.63	1933.06	3152.01	2091.55	-0.811388	0.569833	9.03053e-10	1.17027e-08	2091.55	-0.633213	0.644739	1.71411e-06	7.99674e-06
ACBD7	141.824	275.786	113.788	150.747	186.378	70.1149	133.799	239.793	252.505	173.859	-0.0295782	0.979707	0.938699	0.966873	173.859	0.690303	1.61362	0.0712327	0.130652
ACCS	14.4874	22.7857	5.05726	18.2988	11.2389	17.5287	7.71919	4.3284	30.1284	14.6192	-0.374667	0.771283	0.686861	0.801436	14.6192	-0.44925	0.732424	0.629628	0.725187
ACD	891.358	986.857	1078.46	846.971	1238.15	1016.67	807.084	790.365	763.253	935.462	-0.167876	0.890152	0.369054	0.540196	935.462	0.0761055	1.05417	0.683493	0.769655
ACE	57.1872	17.2857	35.4008	42.6971	130.183	11.2685	65.1842	71.8514	40.1712	52.3588	0.930479	1.90591	0.161525	0.30103	52.3588	1.3377	2.52748	0.0436085	0.0868632
ACE2	0	0	0	7.84233	0	0	1.71537	0	0	1.06197	6.03991	65.795	0.180661	0.325442	1.06197	0	1	1	1
ACER2	12.1999	11	0	6.97096	4.68286	0	9.43456	6.92544	0	5.69042	7.62476	197.37	0.00844639	0.0288277	5.69042	7.28756	156.234	0.0119239	0.0283899
ACER3	118.187	116.286	240.22	110.664	177.012	255.419	130.368	122.061	245.331	168.394	-1.04463	0.48477	7.66504e-05	0.000449702	168.394	-0.837361	0.559666	0.00146756	0.00430733
ACHE	87.687	41.6428	115.053	62.7386	67.4332	81.3834	75.4765	94.3591	61.6915	76.385	-0.19349	0.874488	0.647751	0.772133	76.385	-0.347217	0.786099	0.413824	0.528611
ACIN1	1434.25	1840.14	1435	1606.81	2017.38	1360.98	1777.99	2031.75	1357.21	1651.28	0.214149	1.16002	0.0838179	0.185766	1651.28	0.503613	1.41776	4.63866e-05	0.000177154
ACKR1	3.81248	18.8571	0	1.74274	7.49257	0	1.71537	3.46272	1.43469	4.27975	2.43461	5.40619	0.236832	0.395924	4.27975	4.46667	22.1106	0.0266271	0.0570798
ACKR3	5.33747	3.14286	0	0.87137	31.8434	0	4.28844	20.7763	37.3018	11.5069	-1.81594	0.284019	0.23356	0.392062	11.5069	0.586624	1.50173	0.691942	0.776837
ACLY	1893.28	3587.57	1403.39	1758.42	2766.63	1345.96	1761.69	3821.11	1246.74	2176.09	0.437761	1.3545	0.00152363	0.00655746	2176.09	1.34832	2.54615	1.11545e-22	1.88914e-21
ACO1	285.173	432.143	259.184	207.386	343.722	338.054	207.56	385.227	164.989	291.493	-0.123959	0.917666	0.646944	0.77173	291.493	0.605373	1.52137	0.0243871	0.0529642
ACO2	674.046	625.428	571.47	584.689	600.342	537.13	499.174	367.914	497.836	550.892	0.130038	1.09432	0.546708	0.693828	550.892	-0.0116757	0.99194	0.95691	0.976081
ACOT1	16.0124	12.5714	10.1145	9.58507	4.68286	8.76437	18.8691	22.5077	12.9122	12.8911	0.48781	1.40231	0.582384	0.72287	12.8911	0.32847	1.25568	0.712254	0.793834
ACOT11	51.8497	31.4286	58.1585	74.0664	83.3549	70.1149	50.6036	42.4183	78.9077	60.1003	-0.230804	0.85216	0.620726	0.751958	60.1003	-0.401567	0.757036	0.391076	0.506437
ACOT13	896.695	428.214	1818.08	792.946	414.901	1868.06	800.222	364.451	2202.24	1065.09	-1.24109	0.423052	7.07774e-19	2.39986e-17	1065.09	-2.28516	0.205162	9.61257e-58	7.90394e-56
ACOT2	60.9997	26.7143	48.0439	32.2407	23.4143	30.0493	40.3113	54.5378	18.6509	37.218	0.462922	1.37833	0.433389	0.599116	37.218	0.109805	1.07908	0.853456	0.901302
ACOT4	28.2123	14.1429	20.229	21.7842	15.9217	0	8.57687	51.9408	0	17.8675	1.52472	2.87731	0.197678	0.347681	17.8675	2.00894	4.02488	0.0887713	0.156702
ACOT6	6.09997	3.92857	21.4933	5.22822	21.5411	21.2849	14.5807	14.7166	11.4775	13.3723	-1.07124	0.475911	0.243404	0.403779	13.3723	-0.442049	0.736088	0.625724	0.721715
ACOT7	4247.86	4847.07	5396.09	3709.42	5874.18	5268.64	3413.6	4902.34	5415.94	4786.13	-0.499821	0.707195	2.92635e-05	0.000189539	4786.13	-0.041716	0.971499	0.726901	0.806769
ACOT8	627.534	503.643	1086.05	480.996	609.708	1417.32	506.893	389.556	1527.94	794.404	-1.31851	0.400948	3.16407e-11	4.89032e-10	794.404	-1.4237	0.372755	8.2467e-13	7.06338e-12
ACOT9	433.86	330.786	768.703	380.789	468.286	483.292	379.098	320.301	667.129	470.249	-0.68441	0.62226	0.00185685	0.00782372	470.249	-0.778532	0.58296	0.000408578	0.00132893
ACOX1	62.5247	259.286	63.2157	68.8382	171.393	199.076	61.7535	197.375	71.7343	128.355	-0.793121	0.577094	0.0575851	0.138611	128.355	0.909138	1.87792	0.0267168	0.0572229
ACOX2	20.5874	37.7143	32.8722	31.3693	20.6046	51.3341	21.4422	16.4479	0	25.8191	-0.203921	0.868188	0.822161	0.895571	25.8191	-0.174891	0.885834	0.847178	0.896804
ACOX3	69.3871	118.643	18.9647	67.9668	75.8623	66.3588	54.0343	142.837	81.7771	77.3146	0.199835	1.14857	0.684191	0.799657	77.3146	1.01793	2.02501	0.0367947	0.0750452
ACOXL	461.31	604.214	400.788	345.062	522.607	265.435	433.99	305.585	533.703	430.299	0.0493498	1.0348	0.861297	0.921777	430.299	0.257017	1.195	0.362416	0.47798
ACP1	2684.75	1091.36	5411.26	2473.82	1250.32	5475.22	2362.93	1120.19	5037.18	2989.67	-1.08202	0.472366	1.71866e-23	8.43683e-22	2989.67	-2.20213	0.217317	1.05881e-89	2.38521e-87
ACP2	526.885	583.786	421.017	601.245	524.48	348.071	509.466	421.586	395.973	481.39	0.491222	1.40564	0.00838895	0.0286633	481.39	0.393581	1.31365	0.0349899	0.0720974
ACP5	86.9245	63.6428	135.282	126.349	50.5749	92.6519	90.0572	73.5828	133.426	94.7211	-0.252525	0.839426	0.465907	0.626158	94.7211	-0.942022	0.520503	0.00741796	0.0186356
ACP6	252.386	144.571	178.268	251.826	151.725	78.8793	177.541	110.807	190.813	170.757	0.60813	1.52428	0.0719201	0.16461	170.757	-0.136098	0.909977	0.689536	0.775292
ACPP	9.91245	3.14286	0	9.58507	15.9217	0	12.0076	3.46272	0	6.0036	7.76248	217.14	0.00777538	0.0269078	6.0036	7.27202	154.56	0.0127811	0.0302207
ACRBP	1.52499	0.785714	0	13.9419	0	1.25205	1.71537	0	0	2.13556	3.74344	13.3933	0.15591	0.293896	2.13556	-0.643605	0.640112	0.830532	0.884478
ACRC	10.6749	4.71428	3.79294	22.6556	13.112	1.25205	24.0152	22.5077	14.3469	13.008	1.58196	2.99376	0.123966	0.249007	13.008	1.07333	2.10429	0.299874	0.411879
ACRV1	0.762496	4.71428	0	3.48548	0	0	1.71537	8.65679	1.43469	2.30768	2.11396	4.32877	0.403	0.57147	2.30768	3.28643	9.75693	0.188059	0.286807
ACSBG1	15.2499	17.2857	3.79294	37.4689	4.68286	0	13.723	6.05976	5.73875	11.5558	2.82062	7.06465	0.0125721	0.0400132	11.5558	1.58334	2.99664	0.167368	0.261061
ACSF2	96.837	131.214	56.8941	94.9793	85.228	66.3588	73.7611	77.9111	77.4731	84.5174	0.406216	1.32521	0.273124	0.437416	84.5174	0.556082	1.47027	0.132973	0.217912
ACSF3	312.623	365.357	389.409	339.834	255.684	290.476	331.925	297.794	153.511	304.068	0.237948	1.17931	0.411486	0.578861	304.068	0.139371	1.10143	0.630885	0.726483
ACSL1	51.0872	58.1428	7.58589	17.4274	77.7354	12.5205	42.0267	80.5082	11.4775	39.8346	1.81181	3.51083	0.00289235	0.0115808	39.8346	2.77749	6.85656	3.97934e-06	1.76104e-05
ACSL3	962.27	1039.5	680.201	1048.26	881.314	881.445	1247.94	1044.01	1110.45	988.375	0.286939	1.22005	0.121146	0.245008	988.375	0.151117	1.11043	0.414835	0.529532
ACSL4	291.273	355.928	256.656	264.025	386.804	274.199	283.037	321.167	203.725	292.98	0.18906	1.14002	0.361219	0.532424	292.98	0.532262	1.44619	0.00982944	0.0239368
ACSL6	9.14995	1.57143	0	8.7137	3.74629	45.0739	14.5807	1.73136	47.3446	14.6569	-1.50928	0.351287	0.174388	0.317799	14.6569	-3.72291	0.0757342	0.00190468	0.00545024
ACSM1	1.52499	12.5714	2.52863	17.4274	0	0	5.14612	5.19408	1.43469	5.09193	2.60473	6.08277	0.146094	0.280936	5.09193	2.17466	4.51481	0.227008	0.33219
ACSM3	3.81248	16.5	0	18.2988	25.2874	3.75616	5.14612	4.3284	0	8.56993	2.8214	7.06847	0.0570918	0.137625	8.56993	3.58216	11.9767	0.0151304	0.0350062
ACSM6	4.57498	0	31.6079	0	0	0	0	14.7166	0	5.65549	-2.77705	0.14589	0.277199	0.441926	5.65549	-1.10465	0.465017	0.659334	0.75083
ACSS1	7.62496	10.2143	0	1.74274	21.5411	0	16.2961	8.65679	0	7.34178	7.46682	176.903	0.0100195	0.0331531	7.34178	8.11981	278.167	0.00504466	0.0131807
ACSS2	198.249	326.857	183.326	224.813	354.961	187.808	165.534	314.242	256.809	245.844	-0.0911993	0.938742	0.699225	0.810742	245.844	0.66758	1.58841	0.00427094	0.0113422
ACSS3	68.6246	71.5	6.32157	74.9378	79.6086	92.6519	94.3456	51.9408	28.6937	63.1805	0.89517	1.85983	0.160972	0.300269	63.1805	0.66666	1.58739	0.297432	0.409174
ACTA1	83.1121	61.2857	64.48	96.722	152.661	182.8	47.1728	106.479	197.987	110.3	-0.970595	0.510296	0.0381272	0.100144	110.3	-0.475431	0.719252	0.307568	0.42076
ACTA2	17.5374	7.07143	1.26431	8.7137	16.8583	11.2685	6.00381	6.92544	15.7815	10.1583	0.198295	1.14734	0.852126	0.916076	10.1583	0.126551	1.09168	0.905507	0.939381
ACTB	43180.1	38067.1	37749.9	38332.4	46345.3	33449.8	32793.7	37728.9	32885.9	37837	0.135137	1.0982	0.284852	0.449859	37837	0.230755	1.17345	0.0678155	0.125292
ACTC1	256.199	241.214	485.497	296.266	310.942	474.528	267.598	240.659	271.156	316.006	-0.588086	0.665225	0.0177841	0.0537411	316.006	-0.637349	0.642893	0.0103073	0.0249932
ACTG1	19692.2	31102.5	25593.5	16843.6	31501.6	25038.5	13789.9	28001.3	23614.9	23908.7	-0.56101	0.677828	8.51479e-06	6.11733e-05	23908.7	0.287249	1.22031	0.0225799	0.0495036
ACTG1P17	3.04998	0	0	0	13.112	0	0	0	0	1.79578	4.4049	21.1839	0.305691	0.473896	1.79578	6.49494	90.1926	0.126522	0.209153
ACTG1P20	22.1124	28.2857	6.32157	30.4979	11.2389	1.25205	21.4422	13.8509	1.43469	15.1596	3.02439	8.13638	0.00178763	0.00756306	15.1596	2.55659	5.88314	0.00863751	0.0213503
ACTG2	32.7873	35.3571	1.26431	49.6681	105.833	78.8793	19.7268	30.2988	45.91	44.4138	-0.303058	0.810533	0.718933	0.825368	44.4138	0.442649	1.3591	0.597462	0.698157
ACTL10	12.9624	5.5	17.7004	16.556	6.556	43.8218	25.7306	12.9852	0	15.7569	-0.161483	0.894106	0.876808	0.931708	15.7569	-1.30309	0.405258	0.219353	0.323173
ACTL6A	590.172	417.214	895.134	600.374	497.32	689.881	528.335	378.302	1133.4	636.682	-0.66037	0.632716	0.000823939	0.00380609	636.682	-1.07189	0.475696	6.57628e-08	3.5977e-07
ACTL6B	86.9245	59.7143	122.638	81.9087	40.2726	164.019	84.0534	50.2094	97.5587	87.4777	-0.605066	0.657441	0.083787	0.185748	87.4777	-1.35398	0.39121	0.00014981	0.000526078
ACTL8	12.1999	4.71428	2.52863	11.3278	0.936572	10.0164	13.723	11.2538	5.73875	8.0488	1.02528	2.03536	0.368351	0.539358	8.0488	-0.110498	0.926268	0.92447	0.953459
ACTN1	5024.85	6638.5	3523.64	5346.72	6839.78	2868.45	5044.06	6701.22	2609.69	4955.21	0.775755	1.71209	9.4483e-11	1.39124e-09	4955.21	1.16426	2.24118	2.32733e-22	3.83881e-21
ACTN2	35.0748	21.2143	25.2863	15.6847	6.556	33.8054	15.4384	25.9704	5.73875	20.5299	0.027066	1.01894	0.973867	0.987437	20.5299	-0.27319	0.827488	0.742231	0.818645
ACTN3	316.436	387.357	212.405	292.78	428.95	277.956	263.31	359.257	97.5587	292.89	0.566495	1.48092	0.059146	0.14158	292.89	0.996211	1.99475	0.000878017	0.00268283
ACTN4	1720.95	1831.5	600.549	1714.86	2105.41	646.059	1768.55	2229.99	743.168	1484.56	1.3882	2.61752	3.08382e-25	1.79835e-23	1484.56	1.63284	3.10123	2.36392e-34	7.47589e-33
ACTR10	409.46	212.143	394.466	358.133	169.519	326.786	313.056	178.33	499.271	317.907	-0.173785	0.886514	0.437704	0.602578	317.907	-1.12151	0.459612	8.21552e-07	3.99835e-06
ACTR1A	1280.99	2566.14	1007.66	1205.1	2144.75	961.576	1125.29	2532.98	842.161	1518.52	0.360781	1.28412	0.00691882	0.0243913	1518.52	1.36501	2.57578	8.24885e-25	1.59967e-23
ACTR1B	216.549	344.143	121.374	197.801	208.855	169.027	174.968	304.719	143.469	208.989	0.442047	1.35853	0.102256	0.215729	208.989	0.984243	1.97827	0.000252915	0.000856682
ACTR2	591.697	1025.36	882.491	682.282	1157.6	768.76	781.353	1206.76	833.553	881.095	-0.274233	0.82689	0.0748942	0.169857	881.095	0.447862	1.36402	0.00341032	0.00923477
ACTR3	411.748	382.643	690.316	420.872	403.662	666.092	365.375	309.913	513.618	462.693	-0.643247	0.64027	0.000687914	0.00324799	462.693	-0.771616	0.585761	4.89183e-05	0.000186002
ACTR3B	480.372	381.071	527.219	426.971	310.942	396.901	471.728	270.958	516.487	420.294	-0.0622645	0.95776	0.754033	0.850847	420.294	-0.579698	0.669104	0.00379295	0.010187
ACTR5	386.585	411.714	429.867	331.12	404.599	440.722	300.191	309.913	517.922	392.515	-0.446521	0.73381	0.0251756	0.0713939	392.515	-0.301189	0.811583	0.130528	0.21474
ACTR6	259.249	109.214	328.722	197.801	161.09	195.32	287.325	185.255	249.635	219.29	-0.0555467	0.96223	0.847264	0.913237	219.29	-0.765555	0.588227	0.00856141	0.0211973
ACTR8	221.886	304.857	228.841	257.054	318.434	295.484	186.118	257.107	200.856	252.293	-0.126438	0.916091	0.598956	0.735611	252.293	0.27823	1.21271	0.244865	0.352456
ACTRT3	51.0872	40.0714	59.4228	32.2407	102.086	25.041	39.4536	37.2242	28.6937	46.1468	0.117231	1.08465	0.838527	0.90715	46.1468	0.66009	1.58018	0.248309	0.356539
ACVR1	85.3995	91.9285	55.6298	112.407	119.881	106.424	78.0496	90.0307	55.9528	88.4115	0.336393	1.2626	0.382572	0.553285	88.4115	0.46581	1.38109	0.226133	0.331086
ACVR1B	331.686	344.143	147.925	542.863	422.394	135.222	459.72	452.75	104.732	326.826	1.77915	3.43223	7.57129e-13	1.41008e-11	326.826	1.64943	3.13709	3.21192e-11	2.37531e-10
ACVR1C	3.04998	6.28571	0	8.7137	1.87314	0	14.5807	3.46272	0	4.21844	7.50233	181.312	0.0124108	0.0396073	4.21844	6.33029	80.465	0.035781	0.0733721
ACVR2A	105.987	106.071	113.788	103.693	86.1646	73.8711	144.091	135.912	137.73	111.923	0.122701	1.08877	0.725557	0.830037	111.923	0.0152484	1.01063	0.965286	0.981723
ACVR2B	1613.44	5027.78	721.923	2235.93	3735.98	792.549	2508.74	5226.11	958.37	2535.65	1.36287	2.57197	4.98744e-14	1.05422e-12	2535.65	2.50091	5.66043	1.23222e-43	5.90785e-42
ACVR2B-AS1	16.7749	3.92857	18.9647	13.9419	1.87314	5.00821	10.2922	47.6124	1.43469	13.3145	0.684464	1.6071	0.570484	0.714137	13.3145	1.06501	2.09218	0.375965	0.491865
ACVRL1	1.52499	6.28571	18.9647	5.22822	6.556	0	1.71537	0	0	4.475	-1.17086	0.444156	0.550512	0.696719	4.475	-0.566836	0.675096	0.770685	0.839945
ACY1	23.6374	21.2143	30.3435	24.3984	24.3509	45.0739	19.7268	15.5822	30.1284	26.0506	-0.640584	0.641453	0.267835	0.431227	26.0506	-0.790065	0.578318	0.174212	0.269386
ACY3	5.33747	0	0	0	0	0	3.43075	1.73136	7.17343	1.96367	0.304482	1.23497	0.914122	0.952894	1.96367	-2.04004	0.243157	0.491939	0.603862
ACYP1	595.509	114.714	499.404	528.921	88.9743	477.032	616.677	99.5531	374.453	377.249	0.365103	1.28797	0.0613861	0.145874	377.249	-2.15376	0.224725	2.86221e-25	5.65054e-24
ACYP2	59.4747	34.5714	189.647	32.2407	20.6046	189.06	66.0419	39.8213	203.725	92.7986	-1.88269	0.271178	8.20528e-07	6.97703e-06	92.7986	-2.61195	0.163578	2.69343e-11	2.00604e-10
ADA	622.197	652.143	772.496	453.984	621.884	737.459	510.324	436.302	852.204	628.777	-0.573294	0.672081	0.00315481	0.0124861	628.777	-0.46534	0.7243	0.0165041	0.0378166
ADAD2	25.9249	4.71428	3.79294	20.0415	6.556	26.2931	36.8806	5.19408	43.0406	19.1598	0.185044	1.13685	0.822713	0.895875	19.1598	-2.1496	0.225375	0.0143225	0.0333523
ADAL	150.974	127.286	246.541	141.162	145.169	330.542	159.53	173.136	345.759	202.233	-1.03003	0.489701	3.11528e-05	0.000200444	202.233	-1.05036	0.482847	2.23466e-05	8.98288e-05
ADAM10	546.71	762.143	348.951	675.311	822.31	696.141	687.008	1015.44	604.003	684.224	0.211183	1.15764	0.357534	0.528555	684.224	0.656995	1.57679	0.0041277	0.0110034
ADAM11	121.237	175.214	70.8016	137.676	151.725	47.578	120.934	147.166	37.3018	112.181	1.28176	2.43136	0.000117725	0.000661196	112.181	1.60234	3.03635	1.36087e-06	6.44016e-06
ADAM12	0	4.71428	5.05726	6.09959	1.87314	0	6.8615	3.46272	2.86937	3.43754	0.706287	1.6316	0.698613	0.81024	3.43754	0.348316	1.27307	0.84955	0.898656
ADAM15	749.533	885.5	639.743	716.266	1051.77	487.048	795.934	1108.07	878.028	812.432	0.175373	1.12926	0.377243	0.547939	812.432	0.604326	1.52027	0.0022924	0.00644861
ADAM17	144.874	128.857	134.017	160.332	157.344	161.515	148.38	207.763	50.214	143.7	0.387601	1.30822	0.307486	0.475647	143.7	0.510368	1.42441	0.178767	0.275135
ADAM19	182.237	275	72.0659	193.444	179.822	42.5698	195.553	264.032	38.7365	160.384	1.89259	3.71302	3.32355e-09	4.03067e-08	160.384	2.22533	4.67619	3.10859e-12	2.53827e-11
ADAM1A	12.9624	10.2143	12.6431	7.84233	5.61943	0	16.2961	22.5077	5.73875	10.4249	1.01373	2.01913	0.373721	0.544602	10.4249	1.06177	2.08749	0.351543	0.466747
ADAM20P1	6.09997	1.57143	5.05726	6.97096	0	0	5.14612	7.79111	11.4775	4.90159	0.148591	1.10849	0.926888	0.959564	4.90159	-0.809333	0.570646	0.623532	0.720073
ADAM22	110.562	188.571	82.1804	133.32	158.281	91.3998	176.684	120.329	91.8199	128.127	0.663603	1.58403	0.0374606	0.098677	128.127	0.816946	1.76167	0.0103193	0.0250113
ADAM23	369.811	377.928	98.6165	473.154	371.819	157.759	477.732	448.422	226.68	333.547	1.45443	2.74049	6.18291e-08	6.18103e-07	333.547	1.31435	2.4869	1.03104e-06	4.95341e-06
ADAM28	2.28749	3.14286	0	6.97096	0	1.25205	0.857687	2.59704	0	1.9009	2.97889	7.88382	0.255589	0.417874	1.9009	2.17132	4.50437	0.412011	0.52695
ADAM33	33.5498	52.6428	46.7796	27.8838	9.36572	3.75616	31.7344	28.5674	18.6509	28.1034	0.42872	1.34604	0.601296	0.737273	28.1034	0.391363	1.31163	0.633666	0.72853
ADAM8	101.412	76.2143	6.32157	74.0664	34.6531	97.6601	73.7611	134.18	93.2546	76.8359	0.339468	1.26529	0.612254	0.74532	76.8359	0.315242	1.24422	0.638011	0.732585
ADAM9	131.912	110.786	51.8369	113.278	70.2429	92.6519	151.811	118.598	123.383	107.167	0.570857	1.48541	0.133091	0.26262	107.167	0.166218	1.12211	0.663634	0.753898
ADAMTS1	77.7746	201.929	170.682	176.017	144.232	98.9121	102.922	249.316	83.2118	145	0.0126294	1.00879	0.974046	0.987485	145	0.753894	1.68634	0.0506988	0.098458
ADAMTS10	70.1496	55	69.5373	81.9087	70.2429	31.3013	57.4651	122.061	7.17343	62.7599	0.949384	1.93105	0.115274	0.236193	62.7599	1.18823	2.27873	0.0484018	0.0948032
ADAMTS12	104.462	69.1428	51.8369	67.9668	78.672	55.0903	36.0229	129.852	50.214	71.4733	0.409441	1.32817	0.380733	0.551497	71.4733	0.820522	1.76605	0.0777415	0.14049
ADAMTS13	38.8873	64.4286	64.48	40.083	21.5411	28.7972	42.0267	60.5976	7.17343	40.8905	0.262911	1.1999	0.699796	0.811118	40.8905	0.541606	1.45559	0.425973	0.540352
ADAMTS14	77.0121	95.0714	72.0659	108.921	95.5303	65.1067	87.4841	58.8662	182.205	93.5848	-0.220755	0.858116	0.613716	0.746004	93.5848	-0.352284	0.783343	0.421569	0.536254
ADAMTS15	64.0497	157.929	18.9647	95.8507	221.967	31.3013	110.642	235.465	44.4753	108.96	1.52024	2.8684	0.000144139	0.000793294	108.96	2.70676	6.52854	7.79546e-12	6.12208e-11
ADAMTS16	28.2123	58.1428	7.58589	33.112	60.8772	2.5041	36.0229	31.1645	2.86937	28.9435	2.89807	7.45429	9.27418e-05	0.000534199	28.9435	3.52424	11.5054	1.76421e-06	8.20257e-06
ADAMTS17	12.9624	23.5714	1.26431	25.2697	28.0971	17.5287	18.8691	28.5674	8.60812	18.3043	1.05537	2.07825	0.209585	0.363033	18.3043	1.5475	2.92309	0.0642882	0.119663
ADAMTS18	0	7.85714	2.52863	0	0	0	1.71537	0	0	1.34457	-0.575411	0.671095	0.878069	0.932204	1.34457	1.63165	3.09868	0.654377	0.746272
ADAMTS19	232.561	178.357	241.484	220.457	285.654	150.246	284.752	189.584	121.948	211.672	0.52027	1.43422	0.0875122	0.192013	211.672	0.344374	1.2696	0.259098	0.367821
ADAMTS19-AS1	19.8249	11	22.7577	3.48548	9.36572	6.26026	9.43456	2.59704	0	9.41396	0.170829	1.12571	0.892244	0.940221	9.41396	-0.343511	0.788121	0.78697	0.852664
ADAMTS2	80.8246	71.5	97.3522	60.1245	68.3697	77.6272	116.645	78.7768	21.5203	74.749	0.38587	1.30665	0.436224	0.601524	74.749	0.149527	1.10921	0.763575	0.834296
ADAMTS20	18.2999	13.3571	29.0792	21.7842	20.6046	0	30.8767	24.239	21.5203	19.9735	0.489846	1.40429	0.596271	0.733135	19.9735	0.203355	1.15137	0.826574	0.881461
ADAMTS3	22.1124	28.2857	1.26431	20.9129	20.6046	41.3177	15.4384	7.79111	0	17.5252	0.45098	1.36697	0.695456	0.807796	17.5252	0.406918	1.32585	0.724137	0.804385
ADAMTS4	69.3871	126.5	39.1937	84.5229	176.075	102.668	91.7726	223.345	67.4303	108.988	0.229787	1.17266	0.561845	0.707144	108.988	1.32805	2.51063	0.000693623	0.00216486
ADAMTS5	20.5874	39.2857	27.8149	19.1701	9.36572	2.5041	41.169	9.52247	61.6915	25.679	-0.180965	0.882113	0.842311	0.909992	25.679	-0.651777	0.636496	0.476165	0.589471
ADAMTS6	7.62496	7.07143	8.8502	6.09959	2.80971	0	2.57306	0.865679	0	3.98829	0.871945	1.83013	0.622771	0.753161	3.98829	0.275334	1.21027	0.877717	0.919074
ADAMTS7	878.395	1271.29	371.708	1083.98	1135.12	493.309	1018.93	1375.56	218.072	871.82	1.45815	2.74756	1.26931e-10	1.83749e-09	871.82	1.80159	3.48605	1.81157e-15	1.89633e-14
ADAMTS7P1	3.81248	4.71428	1.26431	2.61411	3.74629	1.25205	1.71537	1.73136	0	2.3167	1.66923	3.18045	0.399588	0.568691	2.3167	1.99165	3.97692	0.312647	0.426254
ADAMTS8	825.783	904.357	570.206	785.104	901.918	693.637	937.452	1124.52	638.435	820.157	0.421777	1.33958	0.00800508	0.0275693	820.157	0.623547	1.54066	8.65285e-05	0.000316073
ADAMTS9	9.14995	2.35714	0	9.58507	11.2389	3.75616	2.57306	3.46272	15.7815	6.43383	0.138807	1.10099	0.921305	0.956247	6.43383	-0.190171	0.876502	0.893001	0.930693
ADAMTS9-AS1	0.762496	0	0	0	0	0	0	0	8.60812	1.04118	-3.46251	0.0907153	0.392766	0.562389	1.04118	-6.49647	0.0110756	0.157602	0.248564
ADAMTSL1	8.38745	3.92857	2.52863	1.74274	37.4629	2.5041	3.43075	4.3284	2.86937	7.46476	0.788994	1.72787	0.565112	0.709789	7.46476	2.52958	5.77404	0.0589321	0.111592
ADAMTSL2	39.6498	47.9286	8.8502	27.8838	24.3509	0	20.5845	95.2247	0	29.3858	3.28889	9.77358	0.000604577	0.00289946	29.3858	4.21491	18.5701	1.00284e-05	4.23841e-05
ADAMTSL3	0.762496	29.8571	22.7577	17.4274	0.936572	0	14.5807	0	22.955	12.1419	-0.480852	0.716554	0.761111	0.855652	12.1419	-0.562627	0.677068	0.722326	0.802992
ADAMTSL4	89.212	52.6428	35.4008	66.2241	88.9743	45.0739	77.1919	87.4336	17.2162	62.1522	1.24518	2.37048	0.00723995	0.0253213	62.1522	1.22046	2.33021	0.00854562	0.0211646
ADAP1	108.274	209.786	54.3655	63.61	120.818	52.5862	126.08	156.688	104.732	110.771	0.49855	1.41279	0.217335	0.372686	110.771	1.20873	2.31135	0.00260775	0.00724168
ADAP2	13.7249	14.9286	11.3788	6.09959	5.61943	1.25205	20.5845	45.881	54.5181	19.3319	-0.725597	0.604747	0.49813	0.6542	19.3319	-0.0081446	0.994371	0.993891	1
ADAR	1686.64	3176.64	1236.5	1769.75	3001.71	1066.75	1783.13	3415.97	998.542	2015.07	0.665493	1.58611	5.05044e-08	5.13316e-07	2015.07	1.53839	2.90469	1.00882e-36	3.56775e-35
ADARB1	93.787	96.6428	29.0792	101.95	103.023	32.5534	126.938	150.628	83.2118	90.8681	1.16377	2.24042	0.00775832	0.0268658	90.8681	1.28248	2.43256	0.00332717	0.00904236
ADARB2	15.2499	15.7143	18.9647	12.1992	24.3509	1.25205	7.71919	28.5674	25.8244	16.6491	-0.380066	0.768402	0.676251	0.793616	16.6491	0.581465	1.49637	0.517062	0.626979
ADAT1	221.886	254.571	235.162	227.427	281.908	102.668	259.022	312.51	91.8199	220.775	0.718682	1.64568	0.0267095	0.0748019	220.775	0.979961	1.97241	0.00247845	0.00691636
ADAT2	158.599	261.643	180.797	176.888	219.158	71.367	210.133	207.763	212.334	188.742	0.234325	1.17636	0.496943	0.653151	188.742	0.570755	1.4853	0.097208	0.168652
ADAT3	377.435	488.714	278.149	402.573	694.936	482.04	390.248	523.736	272.59	434.491	0.178872	1.132	0.458175	0.620014	434.491	0.72338	1.65105	0.00260228	0.00723247
ADCK1	109.037	143.786	113.788	125.477	118.945	55.0903	88.3418	119.464	45.91	102.204	0.58452	1.49954	0.131228	0.259934	102.204	0.828535	1.77588	0.0320288	0.0667909
ADCK2	125.049	154.786	111.26	141.162	201.363	164.019	82.338	205.166	195.117	153.362	-0.430572	0.741968	0.177532	0.321355	153.362	0.255922	1.1941	0.418829	0.533595
ADCK3	401.835	506.786	269.299	300.623	475.778	156.507	332.783	413.795	185.075	338.053	0.760941	1.6946	0.00142972	0.00620037	338.053	1.19217	2.28496	5.37367e-07	2.66415e-06
ADCK4	482.66	676.5	415.959	541.992	842.914	408.169	492.313	605.976	517.922	553.823	0.177724	1.1311	0.335627	0.506411	553.823	0.663984	1.58445	0.000302828	0.00101137
ADCK5	108.274	96.6428	117.581	95.8507	48.7017	164.019	66.0419	70.9857	203.725	107.98	-0.842807	0.557558	0.0235873	0.0676597	107.98	-1.16117	0.447151	0.00194889	0.00556223
ADCY1	597.797	1063.86	136.546	792.075	838.232	160.263	710.165	1184.25	192.248	630.603	2.10463	4.30087	4.84038e-25	2.75433e-23	630.603	2.6608	6.32385	3.05262e-39	1.21257e-37
ADCY10	0	3.14286	0	2.61411	0	0	7.71919	0	0	1.49735	6.15247	71.134	0.12948	0.257598	1.49735	4.45107	21.8729	0.278432	0.388863
ADCY10P1	16.0124	3.92857	37.9294	2.61411	8.42914	6.26026	9.43456	9.52247	7.17343	11.256	-0.87043	0.546984	0.410775	0.578169	11.256	-1.23806	0.423941	0.246378	0.35423
ADCY2	565.009	885.5	245.277	643.942	584.421	246.654	602.097	934.934	289.807	555.293	1.21301	2.3182	2.86247e-09	3.49988e-08	555.293	1.62292	3.07998	1.63505e-15	1.71811e-14
ADCY3	151.737	295.429	121.374	213.486	209.792	113.937	229.86	290.003	208.03	203.738	0.427199	1.34462	0.15905	0.297739	203.738	0.847049	1.79882	0.00507509	0.0132518
ADCY4	2.28749	3.92857	0	10.4564	0	0	0.857687	4.3284	0	2.42873	6.54868	93.616	0.0513464	0.126577	2.42873	5.83617	57.1297	0.0836781	0.149153
ADCY5	463.597	550.786	448.832	519.336	479.525	184.052	436.563	631.08	199.421	434.799	0.768892	1.70396	0.00721117	0.0252422	434.799	0.996098	1.9946	0.00049428	0.00158449
ADCY6	357.611	476.143	121.374	447.884	473.905	169.027	416.836	473.527	142.034	342.038	1.49806	2.82462	3.55433e-13	6.8524e-12	342.038	1.71852	3.291	6.44401e-17	7.50508e-16
ADCY7	98.362	77.7857	56.8941	128.963	95.5303	7.51231	92.6302	66.6573	88.9506	79.2539	1.06605	2.09369	0.0617478	0.146486	79.2539	0.650838	1.57008	0.255587	0.36416
ADCY8	4.57498	0	0	5.22822	0	2.5041	0	0	0	1.36748	1.9564	3.88091	0.55038	0.696656	1.36748	-4.73386	0.0375807	0.257714	0.366398
ADCY9	103.699	230.214	82.1804	152.49	186.378	27.5452	78.9072	202.569	70.2996	126.031	0.898241	1.86379	0.0249201	0.0708035	126.031	1.78481	3.44572	7.19429e-06	3.09793e-05
ADCYAP1R1	353.036	942.857	135.282	399.959	785.784	174.035	388.532	1217.15	153.511	505.571	1.30187	2.46548	6.42216e-10	8.54469e-09	505.571	2.67008	6.36465	1.52574e-37	5.62575e-36
ADD1	834.933	1390.71	470.325	894.897	1050.83	366.851	784.784	948.785	507.879	805.556	0.90367	1.87082	1.11912e-06	9.29488e-06	805.556	1.33521	2.52313	5.53849e-13	4.80636e-12
ADD2	1427.39	2253.43	1319.94	1489.17	1716.74	890.209	1506.1	2231.72	987.064	1535.75	0.467808	1.38301	0.00464092	0.0174445	1535.75	0.955886	1.93977	6.818e-09	4.11155e-08
ADD3	514.685	484	260.449	540.249	340.912	379.372	630.4	400.81	449.057	444.437	0.631402	1.54907	0.0052316	0.0192383	444.437	0.173034	1.12743	0.446061	0.560087
ADD3-AS1	6.09997	0	24.022	4.35685	4.68286	0	1.71537	0	35.8672	8.52713	-2.29351	0.203979	0.140709	0.273453	8.52713	-3.70694	0.0765773	0.0233891	0.0510531
ADGRA2	37.3623	64.4286	0	53.1535	79.6086	7.51231	69.4727	51.9408	10.0428	41.5024	3.20868	9.24503	2.83772e-06	2.20124e-05	41.5024	3.50198	11.3293	3.06803e-07	1.56204e-06
ADGRA3	382.773	544.5	227.577	515.851	516.051	117.693	397.967	607.707	173.597	387.079	1.32119	2.49872	5.03578e-08	5.12142e-07	387.079	1.68527	3.216	3.23388e-12	2.63273e-11
ADGRB1	147.162	216.071	45.5153	161.203	154.534	138.978	188.691	296.062	114.775	162.555	0.73259	1.66162	0.0542767	0.132411	162.555	1.15687	2.22973	0.00230722	0.00648474
ADGRB2	386.585	619.928	125.167	480.996	475.778	275.452	413.405	550.572	216.638	393.836	1.05327	2.07523	3.96908e-05	0.0002497	393.836	1.41588	2.66822	3.11393e-08	1.75432e-07
ADGRB3	1.52499	0.785714	11.3788	8.7137	3.74629	0	6.8615	3.46272	40.1712	8.51611	-1.59157	0.331811	0.244305	0.404592	8.51611	-2.69372	0.154565	0.0563903	0.10768
ADGRD1	9.14995	4.71428	7.58589	13.0705	25.2874	0	3.43075	38.0899	0	11.2587	1.73824	3.33628	0.192409	0.340636	11.2587	3.14522	8.84718	0.0170231	0.0388705
ADGRE2	0.762496	0	0	3.48548	21.5411	0	0.857687	3.46272	0	3.3455	5.13129	35.0487	0.122573	0.247114	3.3455	7.42528	171.882	0.0237014	0.051632
ADGRE5	55.6622	40.8571	26.5506	21.7842	24.3509	2.5041	39.4536	77.9111	48.7793	37.5392	0.594841	1.51031	0.443452	0.608069	37.5392	0.885963	1.848	0.252802	0.36137
ADGRF3	15.2499	4.71428	20.229	9.58507	11.2389	11.2685	9.43456	8.65679	8.60812	10.9983	-0.22787	0.853894	0.798373	0.880803	10.9983	-0.714118	0.609578	0.429938	0.544333
ADGRG1	41.1748	37.7143	17.7004	27.0125	43.0823	1.25205	34.3075	31.1645	11.4775	27.2095	1.75659	3.37898	0.0155518	0.048028	27.2095	1.88268	3.68759	0.00946116	0.0231496
ADGRG2	38.1248	58.1428	17.7004	57.5104	34.6531	25.041	56.6074	38.9556	12.9122	37.7386	1.44459	2.72185	0.00796979	0.0274765	37.7386	1.2397	2.36149	0.0233007	0.0509006
ADGRG3	9.91245	2.35714	0	0.87137	0	0	2.57306	17.3136	1.43469	3.82914	3.29394	9.80785	0.160673	0.29985	3.82914	3.84772	14.3972	0.100119	0.172839
ADGRG5	169.274	194.857	141.603	211.743	204.173	63.8547	134.657	202.569	153.511	164.027	0.525008	1.43894	0.117056	0.238744	164.027	0.747407	1.67877	0.0254293	0.0549016
ADGRG6	3.04998	4.71428	1.26431	2.61411	41.2091	0	14.5807	4.3284	0	7.97344	3.95961	15.5583	0.0437488	0.111733	7.97344	5.26992	38.5838	0.00690817	0.0175046
ADGRL1	5357.3	6277.07	1895.21	7068.55	5663.45	1757.88	7093.07	7463.89	1965.52	4949.1	1.79665	3.47414	3.56086e-37	4.92087e-35	4949.1	1.78829	3.45406	7.72264e-37	2.75485e-35
ADGRL2	512.397	787.286	365.387	804.274	782.974	562.171	711.023	876.068	424.667	647.361	0.583476	1.49846	0.00508031	0.0187786	647.361	0.854855	1.80858	3.94428e-05	0.000152291
ADGRL3	50.3247	108.429	39.1937	63.61	54.3212	17.5287	65.1842	91.762	14.3469	56.0778	1.32677	2.5084	0.00945	0.0316057	56.0778	1.836	3.57018	0.000306785	0.00102355
ADGRL3-AS1	0	4.71428	1.26431	0	1.87314	0	0	0	0	0.872416	-3.80192	0.0716982	0.423208	0.589679	0.872416	2.36986	5.16893	0.551945	0.657925
ADGRL4	7.62496	14.1429	1.26431	5.22822	3.74629	0	6.00381	6.05976	17.2162	6.8096	0.0476606	1.03359	0.972808	0.986789	6.8096	0.395699	1.31558	0.776237	0.844318
ADGRV1	290.511	596.357	221.255	362.49	594.723	335.55	357.656	503.825	309.892	396.918	0.221556	1.16599	0.293201	0.459077	396.918	0.968144	1.95632	3.70632e-06	1.64686e-05
ADH5	2247.08	1602.86	3407.33	2102.62	1967.74	3861.33	1794.28	1649.12	3173.53	2422.87	-0.765193	0.588375	1.88751e-08	2.0617e-07	2422.87	-1.00087	0.499698	2.11752e-13	1.90496e-12
ADHFE1	6.09997	0	3.79294	5.22822	0	0	1.71537	1.73136	1.43469	2.22251	1.31906	2.49503	0.545058	0.692428	2.22251	-1.59807	0.330318	0.501589	0.612735
ADI1	1121.63	1166	2527.36	1343.65	1329	3196.49	1014.64	1048.34	3276.82	1780.44	-1.37096	0.386633	8.03687e-19	2.69727e-17	1780.44	-1.34502	0.393649	3.62345e-18	4.60492e-17
ADIPOR1	556.622	280.5	792.725	541.992	350.278	697.393	458.005	257.972	572.44	500.881	-0.406539	0.754431	0.0351956	0.0937162	500.881	-1.21632	0.43038	4.79707e-10	3.22649e-09
ADIPOR2	456.735	787.286	328.722	480.996	533.846	359.339	443.424	777.38	296.98	496.079	0.486684	1.40122	0.0129765	0.041134	496.079	1.09094	2.13012	2.16873e-08	1.24095e-07
ADIRF	7.62496	0	8.8502	0.87137	0	8.76437	3.43075	0	7.17343	4.07945	-1.04929	0.483205	0.492367	0.649682	4.07945	-8.02884	0.00382895	0.00787855	0.0196814
ADK	579.497	430.571	810.425	419.129	291.274	786.289	445.14	371.376	810.598	549.367	-0.736755	0.600087	0.000137026	0.00075744	549.367	-1.13742	0.454572	4.8381e-09	2.96323e-08
ADM	1149.84	991.571	1326.27	1327.97	1668.03	1358.48	1142.44	1283.8	1758.93	1334.15	-0.29533	0.814886	0.113285	0.233456	1334.15	-0.172452	0.887333	0.354966	0.470304
ADM2	345.411	581.428	309.757	387.76	432.696	207.841	368.806	467.467	166.424	363.065	0.685608	1.60838	0.00437777	0.0165843	363.065	1.11344	2.16361	3.44847e-06	1.54104e-05
ADM5	26.6874	11.7857	41.7224	16.556	11.2389	37.5616	24.0152	15.5822	11.4775	21.8474	-0.435918	0.739223	0.527928	0.678519	21.8474	-1.23795	0.423975	0.0793258	0.142757
ADNP	901.27	983.714	489.29	961.121	782.974	600.985	982.91	901.172	449.057	783.61	0.885038	1.84681	4.76261e-08	4.86769e-07	783.61	0.792783	1.73241	1.03553e-06	4.97059e-06
ADNP2	490.285	1056	437.453	499.295	651.854	488.3	555.781	1008.52	368.714	617.355	0.254512	1.19293	0.21511	0.370223	617.355	1.06899	2.09796	1.6484e-07	8.63308e-07
ADNP-AS1	31.2623	13.3571	10.1145	20.9129	7.49257	65.1067	22.2999	12.9852	38.7365	24.6964	-0.612467	0.654077	0.396462	0.565465	24.6964	-1.7482	0.297673	0.0185575	0.0418395
ADO	203.586	261.643	226.312	205.643	219.158	184.052	173.253	264.032	252.505	221.132	-0.184833	0.879751	0.428023	0.594145	221.132	0.17027	1.12527	0.463008	0.576612
ADORA1	150.974	187.786	99.8808	186.473	147.042	140.23	142.376	254.51	130.556	159.981	0.372465	1.29456	0.215219	0.370318	159.981	0.669986	1.59106	0.0253367	0.0547302
ADORA2A-AS1	0.762496	3.14286	18.9647	7.84233	0	1.25205	1.71537	0	0	3.7422	-0.978107	0.507646	0.632829	0.761221	3.7422	-2.66049	0.158166	0.213958	0.316957
ADORA2B	84.637	47.1428	1.26431	96.722	132.993	47.578	60.0381	72.7171	73.169	68.4735	0.98856	1.9842	0.16911	0.310831	68.4735	1.05421	2.07658	0.142521	0.229871
ADPGK	298.898	162.643	211.14	358.133	279.098	363.095	258.164	162.748	136.295	247.802	0.363196	1.28627	0.282715	0.447689	247.802	-0.236319	0.848908	0.486627	0.599123
ADPRH	14.4874	9.42857	69.5373	21.7842	32.78	46.3259	10.2922	11.2538	50.214	29.5671	-1.8361	0.280077	0.00513445	0.0189489	29.5671	-1.64389	0.319992	0.0118893	0.0283278
ADPRHL1	38.1248	30.6428	8.8502	38.3403	11.2389	1.25205	24.8729	32.8958	8.60812	21.6473	2.44769	5.45542	0.00264972	0.010738	21.6473	2.0116	4.03228	0.0139938	0.0327025
ADPRHL2	1308.44	894.143	1151.79	1176.35	1193.19	1029.19	997.49	956.576	1103.27	1090.05	0.0847966	1.06054	0.591829	0.729855	1090.05	-0.11017	0.926479	0.48685	0.59931
ADPRM	35.8373	32.2143	56.8941	44.4399	14.9851	116.441	60.0381	18.1793	54.5181	48.1719	-0.702378	0.614559	0.174334	0.317799	48.1719	-1.7968	0.287812	0.00072087	0.00224097
ADRA1D	3.81248	16.5	0	3.48548	19.668	0	3.43075	4.3284	0	5.69168	6.20923	73.9887	0.0342652	0.0916693	5.69168	8.12443	279.059	0.00528955	0.0137572
ADRA2A	7.62496	13.3571	0	8.7137	5.61943	0	6.00381	8.65679	1.43469	5.71228	4.05791	16.6553	0.0292274	0.080591	5.71228	4.36765	20.644	0.0187185	0.042139
ADRA2B	138.774	99.7857	92.2949	138.548	93.6572	162.767	156.099	181.793	157.815	135.726	0.0708151	1.05031	0.838983	0.907583	135.726	-0.136971	0.909427	0.695251	0.779586
ADRA2C	127.337	192.5	58.1585	111.535	172.329	86.3916	111.499	247.584	100.428	134.196	0.519784	1.43374	0.0974741	0.20815	134.196	1.32507	2.50545	1.96958e-05	7.96797e-05
ADRB1	2.28749	6.28571	0	18.2988	4.68286	0	0	6.92544	0	4.27558	7.14599	141.63	0.0232733	0.0669885	4.27558	6.94725	123.404	0.0275231	0.0587206
ADRB2	10.6749	10.2143	0	8.7137	0.936572	0	2.57306	16.4479	7.17343	6.30377	1.65056	3.13956	0.305735	0.47392	6.30377	1.98085	3.94727	0.217796	0.32134
ADRBK1	484.185	748.786	140.339	554.191	456.11	217.857	527.478	739.29	193.683	451.324	1.50474	2.83773	2.03334e-10	2.87518e-09	451.324	1.81781	3.52546	1.42342e-14	1.395e-13
ADRBK2	150.212	412.5	118.846	169.917	345.595	23.789	172.395	367.914	195.117	217.365	0.547962	1.46202	0.219837	0.37553	217.365	1.74122	3.34318	8.94049e-05	0.000325928
ADRM1	9233.83	8599.64	10224.5	8314.61	11332.5	10348.2	8119.73	8028.31	10061.5	9362.53	-0.255136	0.837908	0.0490749	0.122204	9362.53	-0.131856	0.912657	0.309088	0.422383
ADSL	4065.63	3844.5	7052.34	3717.26	5022.83	5426.39	2910.99	3777.82	5877.91	4632.85	-0.779444	0.582591	6.96424e-07	6.01191e-06	4632.85	-0.537874	0.688785	0.000613089	0.00193295
ADSS	443.01	373.214	314.814	407.801	428.95	286.72	421.125	430.243	362.976	385.428	0.400794	1.32023	0.0272749	0.0761262	385.428	0.354469	1.27852	0.0512362	0.0993841
ADSSL1	224.174	234.929	237.691	142.905	173.266	141.482	162.103	105.613	156.381	175.394	-0.0169194	0.988341	0.96068	0.980065	175.394	-0.0594098	0.959657	0.862697	0.907704
AEBP1	849.42	1353.79	534.805	1028.22	1545.34	505.829	1185.32	1724.43	777.6	1056.08	0.753569	1.68596	7.88765e-05	0.000461281	1056.08	1.34782	2.54527	1.46169e-12	1.22515e-11
AEBP2	353.798	401.5	283.206	404.316	310.005	246.654	470.013	358.391	229.55	339.715	0.692104	1.61564	0.000874584	0.00400516	339.715	0.494494	1.40883	0.0177659	0.0403815
AEN	1623.35	1958	1041.79	1522.28	2392	1679	1407.47	1621.42	1411.73	1628.56	0.139934	1.10185	0.443797	0.608169	1628.56	0.530913	1.44484	0.00362718	0.00977565
AES	3812.48	2537.07	2761.26	2648.96	2096.98	2709.44	4487.42	2333.01	2770.38	2906.33	0.409944	1.32863	0.0127897	0.0406193	2906.33	-0.242118	0.845503	0.142192	0.229565
AFAP1	178.424	231	68.273	196.93	256.621	73.8711	198.126	274.42	43.0406	168.967	1.62413	3.08256	7.71547e-09	8.93527e-08	168.967	2.03429	4.09621	3.78167e-13	3.32742e-12
AFAP1L1	131.149	146.929	203.555	107.178	73.0526	45.0739	108.926	92.6277	32.9978	104.61	0.300044	1.23118	0.58221	0.722782	104.61	0.149317	1.10904	0.784517	0.850713
AFAP1L2	49.5622	54.2143	25.2863	60.9959	81.4817	18.7808	39.4536	88.2993	51.6487	52.1914	0.656477	1.57623	0.194663	0.343479	52.1914	1.23399	2.35216	0.0141024	0.0329142
AFF1	661.846	699.286	524.69	843.486	976.844	366.851	961.468	1085.56	352.933	719.218	0.986002	1.98069	7.10714e-06	5.16469e-05	719.218	1.14888	2.21741	1.65016e-07	8.63957e-07
AFF2	30.4998	74.6428	12.6431	57.5104	78.672	117.693	72.9034	96.0904	34.4325	63.8986	-0.0378466	0.974108	0.951973	0.974492	63.8986	0.595617	1.51112	0.341018	0.456235
AFF3	6.86246	20.4286	0	21.7842	29.0337	1.25205	8.57687	34.6272	1.43469	13.7778	3.81454	14.0699	0.00413692	0.0158176	13.7778	4.99313	31.8479	0.000156511	0.000548322
AFF4	301.186	397.571	271.828	572.49	410.218	254.167	467.44	555.766	361.541	399.134	0.596053	1.51158	0.0208663	0.0612106	399.134	0.620728	1.53765	0.0161482	0.0370993
AFG3L1P	188.336	165	322.4	184.73	118.945	370.607	231.576	179.196	276.894	226.409	-0.682917	0.622904	0.00575042	0.0208708	226.409	-1.06579	0.47771	1.91315e-05	7.75491e-05
AFG3L2	1080.46	1301.93	962.143	988.133	1576.25	805.07	1086.69	1530.52	753.21	1120.49	0.323585	1.25144	0.0262272	0.0736722	1120.49	0.805747	1.74805	2.80144e-08	1.58533e-07
AFMID	272.211	161.071	288.264	207.386	171.393	192.816	177.541	156.688	183.64	201.223	-0.0166376	0.988534	0.951182	0.97394	201.223	-0.443809	0.735191	0.104865	0.179561
AFP	85.3995	47.1428	195.969	61.8672	26.224	174.035	51.4612	45.0153	175.032	95.794	-1.45352	0.365129	4.4416e-05	0.000275943	95.794	-2.19846	0.217869	1.68963e-09	1.07823e-08
AFTPH	141.062	89.5714	115.053	151.618	113.325	112.685	163.818	140.24	189.379	135.195	0.132821	1.09644	0.674939	0.792812	135.195	-0.279673	0.823777	0.380617	0.496392
AGA	82.3496	54.2143	118.846	113.278	17.7949	75.1231	118.361	26.8361	209.464	90.6963	-0.359986	0.779172	0.441742	0.606432	90.6963	-2.01983	0.246587	2.69843e-05	0.000106904
AGAP1	290.511	748.786	123.903	358.133	417.711	128.961	421.125	812.873	251.07	394.786	1.08919	2.12754	0.000356531	0.00179466	394.786	1.97772	3.93871	7.6264e-11	5.48387e-10
AGAP11	6.09997	1.57143	1.26431	2.61411	0	2.5041	10.2922	0.865679	4.30406	3.27955	1.24439	2.36919	0.443851	0.608169	3.27955	-1.6873	0.310507	0.35074	0.465831
AGAP2	16.7749	14.1429	18.9647	26.1411	10.3023	1.25205	16.2961	8.65679	0	12.5034	1.53841	2.90475	0.170351	0.312763	12.5034	0.701364	1.62604	0.535937	0.643305
AGAP2-AS1	9.91245	7.07143	32.8722	15.6847	6.556	3.75616	12.0076	2.59704	14.3469	11.6449	-0.440918	0.736666	0.649034	0.772817	11.6449	-1.65112	0.318392	0.0992346	0.171672
AGAP3	1177.29	1492.86	460.21	1283.53	1164.16	503.325	1140.72	1295.92	453.361	996.82	1.34534	2.54089	3.83835e-20	1.44443e-18	996.82	1.4802	2.78988	4.49703e-24	8.26298e-23
AGAP5	7.62496	4.71428	7.58589	2.61411	0.936572	6.26026	9.43456	0.865679	0	4.44848	0.497756	1.41202	0.745399	0.845035	4.44848	-1.08179	0.472443	0.4968	0.60824
AGAP6	32.0248	33.7857	46.7796	42.6971	20.6046	61.3506	74.6188	33.7615	40.1712	42.866	0.00670523	1.00466	0.989644	0.996796	42.866	-0.749483	0.594817	0.15339	0.243485
AGAP7P	9.14995	3.92857	0	2.61411	0	13.7726	7.71919	5.19408	30.1284	8.05632	-1.16554	0.445798	0.413166	0.580628	8.05632	-2.25364	0.209695	0.123026	0.204521
AGAP9	7.62496	7.07143	0	7.84233	14.9851	10.0164	12.0076	3.46272	10.0428	8.11705	0.458203	1.37383	0.705944	0.815428	8.11705	0.348678	1.27339	0.774583	0.843427
AGBL3	3.81248	0.785714	10.1145	17.4274	0	20.0328	8.57687	11.2538	4.30406	8.47863	-0.214886	0.861614	0.871121	0.928003	8.47863	-1.52013	0.348656	0.263121	0.372249
AGBL5	1240.58	872.928	548.712	1271.33	939.381	840.127	985.483	770.455	571.005	893.333	0.83492	1.78376	8.95033e-06	6.41343e-05	893.333	0.397357	1.31709	0.0350627	0.0721931
AGER	38.1248	29.8571	70.8016	51.4108	14.0486	25.041	51.4612	28.5674	40.1712	38.8315	0.0503741	1.03553	0.928155	0.960331	38.8315	-0.904824	0.534098	0.112222	0.189495
AGFG1	173.849	231.786	309.757	162.946	198.553	260.427	193.837	287.406	120.514	215.453	-0.382689	0.767007	0.230394	0.388286	215.453	0.0533553	1.03768	0.866709	0.910446
AGFG2	35.8373	47.9286	0	27.0125	43.0823	75.1231	9.43456	33.7615	50.214	35.8215	-0.792092	0.577506	0.384054	0.554501	35.8215	-0.00585087	0.995953	0.99484	1
AGGF1	278.311	323.714	434.924	365.975	376.502	441.974	360.229	290.868	411.755	364.917	-0.360562	0.778861	0.0671248	0.156311	364.917	-0.379677	0.76861	0.054147	0.104146
AGK	137.249	73.0714	99.8808	166.432	162.027	279.208	115.788	108.21	93.2546	137.236	-0.173148	0.886905	0.689134	0.803175	137.236	-0.463909	0.725019	0.285243	0.396653
AGL	116.662	161.071	161.832	96.722	168.583	249.158	109.784	164.479	199.421	158.635	-0.91699	0.529613	0.000630593	0.00301194	158.635	-0.305367	0.809236	0.249304	0.357531
AGMAT	214.261	282.071	348.951	124.606	275.352	276.704	139.803	260.57	299.849	246.907	-0.949004	0.51799	0.000168503	0.00091393	246.907	-0.178187	0.883813	0.475019	0.588451
AGMO	0.762496	0.785714	0	0	0	0	7.71919	0	27.259	4.05849	-1.68186	0.311682	0.472114	0.631479	4.05849	-5.05294	0.0301241	0.0642351	0.119604
AGO1	342.361	708.714	190.911	307.593	460.793	117.693	352.51	509.885	169.293	351.084	1.06982	2.09917	1.09399e-05	7.71141e-05	351.084	1.81483	3.51819	6.28988e-14	5.85052e-13
AGO2	139.537	228.643	70.8016	128.091	180.758	46.3259	163.818	181.793	43.0406	131.423	1.42616	2.6873	7.35378e-06	5.32979e-05	131.423	1.88141	3.68436	2.80053e-09	1.75182e-08
AGO3	99.1245	93.5	198.497	75.8092	78.672	241.646	59.1804	88.2993	90.3852	113.902	-1.18098	0.441052	0.00227462	0.00937966	113.902	-1.02789	0.490427	0.00780166	0.0195101
AGO4	86.9245	57.3571	91.0306	60.9959	72.116	47.578	115.788	67.523	43.0406	71.3726	0.535329	1.44927	0.216669	0.371797	71.3726	0.11348	1.08183	0.794771	0.858119
AGPAT1	676.334	644.286	633.421	655.27	586.294	572.188	614.962	675.23	814.902	652.543	-0.0523762	0.964347	0.75747	0.853074	652.543	-0.0828023	0.944222	0.625735	0.721715
AGPAT2	3038.55	2204.71	3221.47	3515.11	3062.59	4087.95	2781.48	2138.23	3579.54	3069.96	-0.222188	0.857264	0.158734	0.297581	3069.96	-0.556498	0.67995	0.000422188	0.00136806
AGPAT3	43.4623	29.0714	58.1585	42.6971	38.3994	1.25205	51.4612	16.4479	48.7793	36.6366	0.349119	1.27378	0.658812	0.780953	36.6366	-0.365289	0.776313	0.646397	0.739272
AGPAT4	199.774	449.428	199.762	243.112	324.054	156.507	177.541	314.242	206.595	252.335	0.141235	1.10285	0.571781	0.715216	252.335	0.952362	1.93504	0.000119099	0.000424948
AGPAT4-IT1	8.38745	45.5714	20.229	5.22822	23.4143	0	2.57306	20.7763	5.73875	14.6576	-0.679063	0.624571	0.533327	0.683385	14.6576	1.78776	3.45278	0.0885656	0.156457
AGPAT5	1142.22	1371.86	1127.77	1087.47	1242.83	1131.86	1844.89	1592.85	1176.44	1302.02	0.245797	1.18575	0.197266	0.347179	1302.02	0.292377	1.22466	0.125109	0.20713
AGPS	144.874	221.571	246.541	140.291	221.031	115.189	185.26	239.793	347.194	206.861	-0.589739	0.664463	0.0796067	0.178526	206.861	-0.0528788	0.964011	0.874528	0.916493
AGRN	1226.09	2689.5	474.118	1529.25	2339.56	627.278	1309.69	2648.98	403.147	1471.96	1.4321	2.69838	1.01752e-17	3.0703e-16	1471.96	2.34987	5.09777	3.12116e-45	1.60901e-43
AGTPBP1	253.911	380.286	307.228	237.884	418.647	255.419	301.048	349.734	370.149	319.367	-0.233079	0.850817	0.277696	0.442468	319.367	0.301627	1.23253	0.157289	0.248213
AGTRAP	3778.17	2240.86	3865.01	3678.92	3279.87	4443.53	3374.14	2532.98	3314.13	3389.73	-0.101905	0.931802	0.505047	0.659502	3389.73	-0.529717	0.692691	0.000539696	0.00171802
AGXT	0	0	0	0	0	0	0	0	10.0428	1.11587	-6.77308	0.00914322	0.140214	0.272749	1.11587	-6.71966	0.00948813	0.14338	0.230893
AHCTF1	203.586	258.5	227.577	243.984	233.206	150.246	277.033	247.584	190.813	225.837	0.349162	1.27382	0.152401	0.289538	225.837	0.379212	1.30063	0.120248	0.200815
AHCTF1P1	3.04998	1.57143	7.58589	6.97096	1.87314	3.75616	0.857687	2.59704	1.43469	3.29966	-0.241108	0.846095	0.877008	0.93186	3.29966	-1.08908	0.470062	0.496519	0.607941
AHCY	3154.45	4379.57	4485.79	2759.63	5172.68	5470.22	2232.56	4454.79	4250.98	4040.07	-0.802278	0.573443	4.90309e-08	4.99574e-07	4040.07	-0.0206574	0.985783	0.888087	0.927301
AHCYL1	892.883	1151.86	748.474	740.664	781.101	600.985	733.323	849.232	684.345	798.096	0.219233	1.16411	0.22942	0.38723	798.096	0.452803	1.3687	0.0129375	0.0305378
AHCYL2	86.162	208.214	109.995	92.3652	118.008	58.8465	146.665	88.2993	156.381	118.326	0.00190779	1.00132	0.996468	1	118.326	0.354019	1.27812	0.410138	0.525168
AHDC1	230.274	411.714	63.2157	290.166	426.14	95.156	326.779	485.646	65.9956	266.121	1.91335	3.76683	5.99315e-14	1.25391e-12	266.121	2.5576	5.88727	6.13872e-24	1.11795e-22
AHI1	368.286	371.643	630.893	404.316	500.129	475.78	496.601	565.289	869.42	520.262	-0.638029	0.64259	0.00762491	0.0264819	520.262	-0.459022	0.727479	0.0546657	0.104886
AHNAK	58.7122	106.071	39.1937	56.639	114.262	30.0493	101.207	109.076	35.8672	72.3419	1.04252	2.05982	0.0106181	0.0347352	72.3419	1.64834	3.13472	4.68348e-05	0.000178659
AHNAK2	125.812	299.357	36.6651	150.747	296.893	77.6272	163.818	399.944	60.2568	179.013	1.33455	2.52197	2.02967e-05	0.000135362	179.013	2.51297	5.70794	4.94001e-16	5.38003e-15
AHR	19.8249	64.4286	6.32157	15.6847	32.78	35.0575	36.8806	45.0153	17.2162	30.3566	0.302292	1.2331	0.666035	0.785777	30.3566	1.27892	2.42657	0.0647002	0.120266
AHRR	15.2499	22.7857	1.26431	14.8133	21.5411	0	8.57687	1.73136	0	9.5514	4.89207	29.6933	0.00752637	0.0261839	9.5514	5.14517	35.3875	0.00490371	0.0128656
AHSA1	5242.92	3003	3829.61	5625.56	3567.4	3762.42	5150.41	2665.43	3862.18	4078.77	0.483902	1.39852	5.59979e-05	0.000339935	4078.77	-0.310736	0.806231	0.00989358	0.0240823
AHSA2	51.8497	135.929	166.889	62.7386	41.2091	165.271	85.7687	74.4484	86.0812	96.6872	-1.0643	0.478204	0.0196063	0.0582206	96.6872	-0.73156	0.602252	0.107392	0.182803
AHSG	4.57498	3.14286	0	0	0	0	0	3.46272	0	1.24228	4.98651	31.7023	0.242228	0.402327	1.24228	5.5116	45.62	0.194874	0.294631
AHSP	23.6374	6.28571	39.1937	13.9419	2.80971	33.8054	13.723	6.92544	30.1284	18.939	-1.00505	0.498252	0.146166	0.28097	18.939	-2.67815	0.156241	0.000328097	0.00108781
AICDA	2.28749	0	0	0	0	7.51231	0	0	0	1.08887	-1.70752	0.306187	0.659178	0.781218	1.08887	-6.30923	0.0126105	0.17037	0.264539
AIDA	27.4499	51.8571	55.6298	36.5975	35.5897	31.3013	30.0191	38.0899	30.1284	37.407	-0.318892	0.801685	0.537952	0.686789	37.407	0.100477	1.07213	0.844949	0.895078
AIF1	100.649	28.2857	145.396	76.6805	46.8286	180.296	97.7764	51.0751	218.072	105.007	-0.981174	0.506567	0.00405044	0.015523	105.007	-2.1104	0.231582	2.21994e-09	1.40466e-08
AIF1L	2427.79	3411.57	3265.72	2337.88	3580.51	3771.18	2191.39	3400.39	3324.17	3078.96	-0.57464	0.671454	6.47422e-08	6.45655e-07	3078.96	0.00417521	1.0029	0.968567	0.983519
AIFM1	2282.15	3014	2175.88	2257.72	3510.27	1894.36	2061.88	2602.23	1865.09	2407.06	0.153404	1.11219	0.254462	0.416562	2407.06	0.62042	1.53732	3.89016e-06	1.72389e-05
AIFM2	249.336	414.857	264.242	244.855	251.001	172.783	313.056	266.629	262.548	271.034	0.207277	1.15451	0.442453	0.607053	271.034	0.416782	1.33495	0.121939	0.202984
AIFM3	33.5498	35.3571	88.502	25.2697	14.9851	53.8382	44.5997	16.4479	51.6487	40.4665	-0.908532	0.532727	0.0942919	0.203247	40.4665	-1.53278	0.34561	0.00550318	0.0142587
AIG1	334.736	194.071	532.276	426.1	257.557	729.946	410.832	351.466	496.401	414.821	-0.58688	0.665781	0.0154509	0.0477882	414.821	-1.13217	0.456227	3.4552e-06	1.54362e-05
AIM1	168.512	352	152.982	227.427	443.935	170.279	249.587	402.541	208.03	263.921	0.281638	1.21557	0.244189	0.404562	263.921	1.17494	2.25784	9.19048e-07	4.44783e-06
AIM1L	281.361	309.571	222.519	319.793	225.714	256.671	271.887	256.241	156.381	255.571	0.455474	1.37123	0.0642712	0.151124	255.571	0.315276	1.24425	0.201338	0.302292
AIM2	19.0624	2.35714	24.022	14.8133	0.936572	12.5205	10.2922	2.59704	77.4731	18.2305	-1.36175	0.389111	0.106791	0.222751	18.2305	-4.25602	0.0523373	1.63021e-05	6.67551e-05
AIMP1	1134.59	940.5	1926.81	1150.21	1115.46	1999.53	1407.47	1291.59	2106.12	1452.48	-0.708279	0.61205	2.01018e-06	1.59544e-05	1452.48	-0.849857	0.55484	1.24374e-08	7.31519e-08
AIMP2	584.834	555.5	939.385	590.789	759.56	1089.29	455.432	461.407	944.024	708.913	-0.865937	0.54869	1.22623e-05	8.55552e-05	708.913	-0.743636	0.597232	0.000171555	0.000597212
AIP	1237.53	1140.07	1400.86	1105.77	1494.77	1546.28	1151.02	966.964	1535.11	1286.49	-0.358997	0.779706	0.0260638	0.0733058	1286.49	-0.315892	0.803354	0.0502389	0.0976917
AIPL1	16.0124	0.785714	37.9294	15.6847	17.7949	6.26026	7.71919	12.1195	0	12.7007	-0.168877	0.889535	0.893659	0.940919	12.7007	-0.53516	0.690082	0.673278	0.761699
AJAP1	111.324	164.214	115.053	162.075	168.583	68.8629	163.818	180.061	91.8199	136.201	0.664042	1.58452	0.0315364	0.0857357	136.201	0.895391	1.86011	0.00365698	0.00985079
AJUBA	193.674	301.714	356.537	181.245	224.777	148.994	184.403	317.704	101.863	223.435	-0.120804	0.919675	0.742092	0.842797	223.435	0.473348	1.38833	0.195632	0.295543
AK1	1317.59	1160.5	1690.39	1032.57	1453.56	1835.51	1100.41	1218.01	1682.89	1387.94	-0.593786	0.662602	3.3346e-05	0.000213292	1387.94	-0.443372	0.735414	0.00193079	0.00551344
AK2	1194.83	898.857	1619.59	1026.47	1232.53	1992.02	1018.07	839.709	1988.48	1312.28	-0.789357	0.578602	2.24822e-06	1.76984e-05	1312.28	-0.914914	0.530376	4.37329e-08	2.43215e-07
AK3	156.312	153.214	240.22	182.116	181.695	171.531	123.507	95.2247	175.032	164.317	-0.345747	0.7869	0.26851	0.431806	164.317	-0.449238	0.73243	0.151422	0.241013
AK4	315.673	595.571	244.013	238.755	402.726	225.369	292.471	618.095	249.635	353.59	0.237223	1.17872	0.292184	0.457921	353.59	1.16978	2.24978	1.58463e-07	8.31767e-07
AK5	86.9245	37.7143	51.8369	51.4108	57.1309	32.5534	33.4498	3.46272	186.509	60.1103	-0.65369	0.635653	0.388656	0.558937	60.1103	-1.46133	0.363158	0.055683	0.106515
AK6	936.345	165	2134.16	934.98	218.221	3198.99	983.767	340.212	1962.65	1208.26	-1.35374	0.391275	2.61194e-09	3.21027e-08	1208.26	-3.33526	0.0990798	4.445e-47	2.46121e-45
AK7	19.8249	7.07143	29.0792	19.1701	18.7314	0	15.4384	11.2538	78.9077	22.1641	-0.98406	0.505555	0.329917	0.500208	22.1641	-1.54272	0.343237	0.129781	0.213596
AK8	9.14995	0	1.26431	2.61411	0	0	0	0	0	1.4476	3.20197	9.20216	0.337016	0.507682	1.4476	-3.75317	0.0741625	0.375216	0.491002
AK9	12.9624	22	25.2863	23.527	2.80971	48.83	16.2961	11.2538	7.17343	18.9043	-0.62862	0.646795	0.476276	0.635434	18.9043	-1.16857	0.444861	0.190141	0.289284
AKAP1	1390.79	1355.36	627.1	1473.49	1422.65	722.434	1343.14	1366.04	614.046	1146.12	1.09871	2.14163	6.39685e-18	1.9811e-16	1146.12	1.07675	2.10927	2.98901e-17	3.55161e-16
AKAP10	114.374	106.857	117.581	108.921	157.344	93.9039	119.219	108.21	78.9077	111.702	0.236223	1.1779	0.461068	0.622262	111.702	0.355257	1.27921	0.267126	0.376581
AKAP11	57.1872	175.214	116.317	135.062	167.646	81.3834	100.349	124.658	51.6487	112.163	0.225796	1.16942	0.576775	0.718626	112.163	0.903958	1.87119	0.0245369	0.0532295
AKAP12	2385.85	4638.07	2848.5	3179.63	4767.15	3522.02	3091.11	5258.14	3513.55	3689.33	-0.191415	0.875747	0.166124	0.307197	3689.33	0.569132	1.48363	3.69665e-05	0.000143342
AKAP13	838.745	1716.79	414.695	1050.87	1349.6	474.528	1140.72	1820.52	519.356	1036.2	1.10566	2.15197	2.07219e-10	2.92508e-09	1036.2	1.79572	3.47189	3.86729e-25	7.60737e-24
AKAP14	6.86246	9.42857	11.3788	10.4564	0	2.5041	5.14612	0	15.7815	6.83979	-0.398198	0.758806	0.787047	0.872287	6.83979	-1.62993	0.323103	0.280742	0.39152
AKAP17A	1449.5	1351.43	1187.19	1327.97	1387.06	915.25	1283.1	1223.21	1071.71	1244.05	0.35562	1.27954	0.0103024	0.0339334	1244.05	0.319826	1.24818	0.0211311	0.0467197
AKAP2	3.81248	13.3571	6.32157	6.09959	14.9851	2.5041	8.57687	17.3136	1.43469	8.26724	0.833225	1.78166	0.456308	0.618682	8.26724	2.14064	4.40957	0.0503708	0.0979018
AKAP3	5.33747	3.14286	2.52863	5.22822	17.7949	5.00821	6.8615	1.73136	1.43469	5.45198	0.947573	1.92862	0.495409	0.65176	5.45198	1.31989	2.49647	0.339858	0.455246
AKAP5	11.4374	29.8571	25.2863	15.6847	24.3509	2.5041	9.43456	22.5077	58.8221	22.2094	-1.23914	0.423625	0.149789	0.286302	22.2094	-0.168426	0.889813	0.84226	0.893133
AKAP6	0.762496	0	0	0	0	0	9.43456	0	0	1.13301	6.1342	70.2391	0.169398	0.31119	1.13301	0	1	1	1
AKAP7	35.8373	47.1428	120.11	43.5685	19.668	96.408	46.3151	19.0449	4.30406	48.0443	-0.815659	0.568149	0.28051	0.445527	48.0443	-1.36256	0.388892	0.0731899	0.133571
AKAP8	934.82	1078.79	737.095	837.386	1137.93	821.346	934.022	1115	641.305	915.299	0.298118	1.22954	0.0356233	0.0946032	915.299	0.597806	1.51341	2.40064e-05	9.60083e-05
AKAP8L	2717.54	3171.14	1871.19	2424.15	3231.17	2420.22	2956.45	2954.56	2451.88	2688.7	0.264404	1.20114	0.0484551	0.120932	2688.7	0.472799	1.3878	0.000414287	0.00134617
AKAP9	515.447	1342.79	1510.86	823.444	1455.43	1568.82	702.446	1464.73	1350.04	1192.67	-1.11885	0.460462	2.62228e-11	4.08365e-10	1192.67	-0.0557157	0.962117	0.737997	0.815671
AKIP1	597.034	344.143	823.069	540.249	409.282	885.201	413.405	277.883	784.773	563.893	-0.684736	0.622119	0.000470543	0.0023154	563.893	-1.2743	0.413425	1.07955e-10	7.67542e-10
AKIRIN1	1479.24	2244	1400.86	1433.4	1946.2	1463.65	1410.04	2144.29	1073.15	1621.65	0.133823	1.0972	0.338096	0.50871	1621.65	0.685236	1.60796	8.6645e-07	4.20194e-06
AKIRIN2	423.185	365.357	485.497	381.66	410.218	209.093	413.405	447.556	216.638	372.512	0.417835	1.33592	0.14174	0.274786	372.512	0.423323	1.34101	0.136701	0.222756
AKNA	275.261	433.714	109.995	367.718	462.666	191.564	295.902	419.855	203.725	306.711	0.895366	1.86008	0.00034412	0.00173964	306.711	1.38315	2.60837	2.84159e-08	1.60639e-07
AKR1A1	3429.71	4446.36	6317.78	2725.64	4733.43	5710.61	2650.25	4544.82	5269.6	4425.36	-0.973972	0.509102	7.61394e-15	1.74389e-13	4425.36	-0.333991	0.793339	0.00755458	0.0189504
AKR1B1	5832.33	4870.64	6671.79	4851.79	6584.1	6784.87	4349.33	5009.69	6372.88	5703.05	-0.3994	0.758173	0.00479948	0.0179421	5703.05	-0.268471	0.830199	0.0579635	0.110083
AKR1C1	11.4374	1.57143	25.2863	2.61411	19.668	40.0657	5.14612	1.73136	0	11.9467	-1.76573	0.294077	0.183936	0.329108	11.9467	-1.52019	0.34864	0.251144	0.359574
AKR1C2	0	0	0	6.09959	0	0	0	6.05976	2.86937	1.66986	1.10387	2.1493	0.751593	0.849407	1.66986	1.09767	2.14009	0.753065	0.826492
AKR1C3	16.7749	38.5	74.5945	7.84233	0	2.5041	18.8691	7.79111	1.43469	18.7012	-0.854335	0.55312	0.522517	0.673945	18.7012	-0.760118	0.590448	0.569276	0.673894
AKR1E2	8.38745	12.5714	0	11.3278	10.3023	31.3013	13.723	0.865679	12.9122	11.2657	-0.404971	0.755252	0.742362	0.843032	11.2657	-0.896815	0.537071	0.470093	0.583668
AKR7A2	1216.18	1228.07	1376.84	972.449	1521.93	1384.77	923.729	1089.02	1555.2	1252.02	-0.471286	0.721321	0.00372967	0.0144657	1252.02	-0.169308	0.889269	0.296669	0.408501
AKR7A2P1	0	0.785714	1.26431	0	0	25.041	0	0	0	3.01012	-8.16984	0.00347243	0.020279	0.0597972	3.01012	-5.01012	0.0310316	0.0699279	0.128648
AKR7A3	6.09997	0.785714	29.0792	6.97096	0	11.2685	0.857687	3.46272	2.86937	6.82157	-1.6352	0.321926	0.234592	0.393328	6.82157	-3.34403	0.0984795	0.0238053	0.0518444
AKR7L	9.14995	0.785714	13.9075	7.84233	0	0	2.57306	0	0	3.8065	0.487816	1.40232	0.805776	0.885229	3.8065	-4.0817	0.0590591	0.096181	0.167216
AKT1	292.036	376.357	201.026	385.145	162.027	390.64	277.891	388.69	185.075	295.432	0.296816	1.22843	0.389411	0.559486	295.432	0.255022	1.19335	0.459843	0.573286
AKT1S1	705.309	804.571	800.311	676.183	1032.1	873.933	776.207	910.695	571.005	794.479	-0.0585441	0.960233	0.746675	0.846167	794.479	0.289618	1.22232	0.109242	0.185235
AKT2	381.248	586.143	269.299	401.701	428.013	205.337	337.929	619.826	233.854	384.817	0.661848	1.58211	0.00183637	0.00774334	384.817	1.20619	2.30728	1.15671e-08	6.81307e-08
AKT3	38.8873	33.7857	15.1718	77.5519	47.7652	42.5698	60.0381	58.8662	50.214	47.2055	0.711393	1.63738	0.193117	0.34156	47.2055	0.381924	1.30308	0.486918	0.59931
AKTIP	112.087	45.5714	130.224	105.436	70.2429	67.6108	54.892	83.9709	57.3875	80.8247	0.0928135	1.06645	0.837227	0.906041	80.8247	-0.356716	0.78094	0.432743	0.547125
ALAD	203.586	131.214	173.211	149.004	223.841	135.222	176.684	271.823	213.768	186.484	0.0216302	1.01511	0.945314	0.970272	186.484	0.263993	1.2008	0.401563	0.516789
ALAS1	510.11	491.857	250.334	518.465	581.611	368.103	414.263	657.916	345.759	459.824	0.58218	1.49711	0.00500539	0.0185475	459.824	0.844689	1.79588	4.50618e-05	0.000172375
ALAS2	7.62496	0	0	0.87137	0	0	0.857687	0	0	1.03934	6.01358	64.6052	0.150082	0.286556	1.03934	0	1	1	1
ALCAM	173.849	250.643	150.453	244.855	288.464	329.29	241.868	267.495	215.203	240.236	-0.0745625	0.94963	0.796882	0.879571	240.236	0.214052	1.15994	0.458923	0.572479
ALDH16A1	813.583	1382.86	681.465	634.357	1205.37	947.804	612.389	1210.22	888.071	930.679	-0.288193	0.818927	0.0951428	0.20474	930.679	0.593925	1.50935	0.00053895	0.00171598
ALDH18A1	611.522	1095.29	367.915	575.975	906.601	519.602	601.239	938.396	377.322	665.984	0.499079	1.41331	0.00456415	0.0171717	665.984	1.21633	2.32355	3.58872e-12	2.90722e-11
ALDH1A1	0	0.785714	25.2863	0.87137	0.936572	1.25205	0	0	2.86937	3.55571	-5.12004	0.0287551	0.0259242	0.0730005	3.55571	-4.09884	0.0583615	0.0478116	0.0939257
ALDH1A3	34.3123	29.8571	3.79294	20.0415	0	26.2931	12.0076	4.3284	21.5203	16.9059	0.365131	1.288	0.748371	0.847528	16.9059	-0.584281	0.666982	0.611301	0.709766
ALDH1B1	564.247	801.428	825.597	641.328	830.739	391.892	579.797	746.216	591.091	663.593	-0.0187486	0.987089	0.93293	0.963247	663.593	0.395102	1.31504	0.0755101	0.13703
ALDH1L1	9.91245	22	25.2863	14.8133	28.0971	67.6108	11.1499	3.46272	5.73875	20.8968	-1.46409	0.362465	0.112681	0.232456	20.8968	-0.885647	0.541245	0.333083	0.448209
ALDH1L2	37.3623	67.5714	10.1145	53.1535	23.4143	1.25205	29.1614	44.1497	0	29.5755	3.36821	10.326	0.000101833	0.000580866	29.5755	3.54588	11.6793	4.23279e-05	0.00016256
ALDH2	1246.68	1207.64	1481.78	1089.21	1812.27	1319.66	1071.25	1445.68	982.76	1295.22	-0.151849	0.900096	0.406501	0.574354	1295.22	0.237851	1.17923	0.192836	0.292222
ALDH3A1	12.9624	1.57143	10.1145	8.7137	0.936572	0	12.8653	3.46272	0	5.62519	1.76049	3.38813	0.252275	0.414163	5.62519	-0.769785	0.586505	0.634024	0.728822
ALDH3A2	542.135	682	573.999	492.324	795.149	414.429	433.99	560.095	668.564	573.632	-0.172897	0.88706	0.409251	0.577001	573.632	0.298841	1.23016	0.152388	0.242245
ALDH3B1	7.62496	3.92857	0	0.87137	0.936572	1.25205	12.0076	0	0	2.95791	3.99632	15.9592	0.0953438	0.205092	2.95791	1.93419	3.82162	0.430596	0.545082
ALDH4A1	629.822	1187.21	576.527	650.042	1156.67	544.643	705.877	916.755	466.273	759.313	0.321857	1.24994	0.0481283	0.120339	759.313	1.03758	2.05278	1.45915e-10	1.02634e-09
ALDH5A1	28.2123	29.0714	12.6431	46.1826	48.7017	26.2931	47.1728	7.79111	10.0428	28.4568	1.30542	2.47156	0.0754682	0.1709	28.4568	0.797552	1.73815	0.280466	0.391201
ALDH6A1	203.586	391.286	350.215	225.685	266.923	252.915	200.699	324.63	239.593	272.837	-0.420965	0.746925	0.0788616	0.177169	272.837	0.221986	1.16634	0.350203	0.465456
ALDH7A1	1818.55	1548.64	1682.8	1656.47	1606.22	1359.73	1595.3	1316.7	1545.16	1569.95	0.144549	1.10538	0.285546	0.450653	1569.95	-0.036973	0.974698	0.785076	0.851172
ALDH9A1	537.56	634.071	400.788	481.867	562.88	330.542	484.593	584.334	210.899	469.726	0.672481	1.59381	0.00209242	0.00870256	469.726	0.916584	1.88764	2.67091e-05	0.00010589
ALDOA	16532.4	20381.4	23698.3	14859.5	26147.2	26733.8	12103.7	18782.6	23204.6	20271.5	-0.759542	0.590684	1.29003e-07	1.22911e-06	20271.5	-0.173136	0.886913	0.228597	0.33395
ALDOC	755.633	929.5	1084.78	618.672	1304.64	1305.89	589.231	934.068	926.807	938.803	-0.756695	0.59185	5.54439e-05	0.000336757	938.803	-0.0674073	0.954352	0.718302	0.79922
ALG1	304.998	339.428	465.268	347.676	436.442	445.731	294.187	392.153	417.494	382.597	-0.489277	0.712382	0.00819971	0.0281218	382.597	-0.187113	0.878362	0.309957	0.423253
ALG10	7.62496	16.5	3.79294	4.35685	8.42914	13.7726	2.57306	4.3284	12.9122	8.25446	-1.0578	0.480366	0.338058	0.50871	8.25446	-0.0527268	0.964112	0.960991	0.978878
ALG10B	19.8249	19.6429	13.9075	17.4274	18.7314	56.3424	17.1537	5.19408	15.7815	20.4451	-0.663776	0.631224	0.404222	0.572595	20.4451	-0.984233	0.505494	0.219561	0.323423
ALG11	33.5498	26.7143	37.9294	25.2697	56.1943	3.75616	37.7382	30.2988	76.0384	36.3877	-0.280629	0.823232	0.710053	0.818793	36.3877	-0.0532137	0.963787	0.943697	0.96632
ALG12	834.17	783.357	568.941	731.079	930.952	939.039	763.342	738.425	859.377	794.298	-0.0233401	0.983952	0.902881	0.94663	794.298	0.0511079	1.03606	0.789292	0.854335
ALG13	268.399	223.143	317.343	272.739	273.479	548.399	235.864	231.136	525.095	321.733	-0.839321	0.558907	0.000411115	0.00204748	321.733	-0.934645	0.523171	8.65045e-05	0.000316056
ALG14	100.649	43.2143	257.92	92.3652	55.2577	167.775	72.0457	41.5526	238.158	118.771	-1.32311	0.399673	2.732e-05	0.000178143	118.771	-2.24704	0.210655	4.91218e-12	3.93263e-11
ALG1L	32.7873	14.9286	65.7443	27.8838	11.2389	46.3259	11.1499	28.5674	30.1284	29.8616	-0.985341	0.505106	0.129498	0.257601	29.8616	-1.37845	0.384632	0.0357866	0.0733721
ALG1L9P	2.28749	4.71428	3.79294	11.3278	4.68286	6.26026	10.2922	12.1195	5.73875	6.80179	0.594492	1.50994	0.612219	0.74532	6.80179	0.447123	1.36332	0.704131	0.787021
ALG2	439.198	270.286	635.95	497.552	437.379	424.446	434.848	300.391	447.622	431.963	-0.137349	0.909188	0.55042	0.696656	431.963	-0.58287	0.667634	0.0116808	0.0278837
ALG3	1140.69	605.786	1169.49	1018.63	875.694	1790.43	843.107	515.079	1879.44	1093.15	-0.688269	0.620598	0.00157613	0.00675514	1093.15	-1.27768	0.412457	5.01291e-09	3.06459e-08
ALG5	595.509	273.429	1002.6	591.66	312.815	1065.5	432.274	225.942	928.242	603.108	-0.887648	0.540495	1.6868e-06	1.35844e-05	603.108	-1.88425	0.270885	1.55228e-23	2.77471e-22
ALG6	82.3496	122.571	144.132	77.5519	67.4332	237.89	113.215	96.9561	144.903	120.778	-0.949547	0.517795	0.00711693	0.024966	120.778	-0.875384	0.545109	0.0130657	0.0308105
ALG8	289.748	336.286	409.638	313.693	199.49	428.202	275.318	268.361	540.877	340.179	-0.649017	0.637715	0.00457184	0.0171958	340.179	-0.775149	0.584328	0.000729069	0.00226389
ALG9	83.8745	120.214	165.625	81.0374	180.758	140.23	76.3342	160.151	78.9077	120.792	-0.676087	0.625861	0.0495528	0.123208	120.792	0.257119	1.19509	0.448841	0.562634
ALK	0	0	0	0	0	0	0	6.05976	0	0.673306	0	1	1	1	0.673306	5.3842	41.7645	0.241246	0.348591
ALKBH1	127.337	114.714	121.374	143.776	77.7354	227.874	104.638	107.344	110.471	126.14	-0.292851	0.816287	0.404592	0.572641	126.14	-0.617167	0.65195	0.080689	0.144719
ALKBH2	421.66	360.643	777.553	359.004	319.371	340.558	348.221	312.51	824.945	451.607	-0.782401	0.581398	0.00390577	0.0150705	451.607	-0.968155	0.511159	0.000365168	0.00120008
ALKBH3	228.749	207.429	284.471	225.685	307.195	299.24	204.13	210.36	454.796	269.117	-0.655342	0.634925	0.0107195	0.0350253	269.117	-0.518166	0.698259	0.0434016	0.0864929
ALKBH4	1156.71	902	771.232	1054.36	923.46	940.291	1021.51	708.126	1236.7	968.264	0.133864	1.09723	0.464432	0.624853	968.264	-0.217801	0.859875	0.235146	0.341817
ALKBH5	657.271	689.071	275.621	715.394	520.734	324.282	708.45	661.379	230.984	531.465	1.32255	2.50108	1.84382e-12	3.29582e-11	531.465	1.16995	2.25004	4.9227e-10	3.30829e-09
ALKBH6	584.834	289.929	490.554	487.096	472.969	782.533	515.47	373.974	760.384	528.638	-0.356644	0.780979	0.115179	0.236056	528.638	-0.83975	0.55874	0.000222839	0.000761709
ALKBH7	1294.72	1471.64	3368.13	1013.4	1666.16	3643.47	941.741	1424.04	3595.32	2046.52	-1.70592	0.306525	2.13178e-34	2.45155e-32	2046.52	-1.2175	0.430026	1.95154e-18	2.535e-17
ALKBH8	64.0497	108.429	70.8016	47.054	39.336	214.101	74.6188	25.9704	61.6915	78.4502	-0.901452	0.535347	0.117636	0.239628	78.4502	-0.994748	0.501823	0.0846874	0.150642
ALLC	2.28749	0	5.05726	1.74274	0	0	0.857687	0	8.60812	2.06148	-1.47538	0.359639	0.51166	0.665211	2.06148	-7.16401	0.00697299	0.0357404	0.0733188
ALMS1	306.523	558.643	245.277	415.643	407.409	138.978	553.208	618.961	193.683	382.036	1.14155	2.20618	3.088e-05	0.000199224	382.036	1.45607	2.7436	1.02152e-07	5.4613e-07
ALMS1-IT1	2.28749	25.1429	2.52863	5.22822	2.80971	0	4.28844	1.73136	0	4.89074	2.1927	4.5716	0.236621	0.395619	4.89074	3.53109	11.5601	0.0535701	0.103278
ALMS1P	0	0	11.3788	0	0	0	0	0	0	1.26431	-6.96009	0.00803162	0.129287	0.257245	1.26431	-6.90667	0.00833459	0.132264	0.216938
ALOX12	13.7249	3.14286	51.8369	38.3403	18.7314	11.2685	37.7382	12.1195	10.0428	21.8828	0.290948	1.22344	0.736886	0.839116	21.8828	-1.11659	0.461182	0.207199	0.309397
ALOX12-AS1	1.52499	0.785714	2.52863	0	7.49257	1.25205	0.857687	0.865679	2.86937	2.01963	-1.45978	0.36355	0.496988	0.653158	2.01963	0.454079	1.36991	0.822564	0.878565
ALOX12B	9.14995	1.57143	3.79294	5.22822	4.68286	5.00821	6.8615	5.19408	12.9122	6.0446	-0.0207551	0.985717	0.985934	0.99501	6.0446	-0.922103	0.527739	0.445715	0.559781
ALOX12P2	23.6374	16.5	72.0659	24.3984	17.7949	50.0821	20.5845	54.5378	14.3469	32.6609	-0.995555	0.501543	0.154351	0.292059	32.6609	-0.623586	0.649055	0.369862	0.485502
ALOX15	0	0.785714	0	13.9419	0	1.25205	0	2.59704	2.86937	2.3829	1.76781	3.40538	0.496106	0.652311	2.3829	-0.268654	0.830093	0.919975	0.950433
ALOX15B	8.38745	3.92857	0	0	0	23.789	2.57306	0	0	4.29756	-1.11649	0.461216	0.635968	0.763672	4.29756	-2.58246	0.166957	0.285947	0.397364
ALOX15P1	0.762496	1.57143	1.26431	5.22822	8.42914	1.25205	0.857687	1.73136	4.30406	2.82231	0.0118659	1.00826	0.994725	1	2.82231	0.788518	1.7273	0.655363	0.747188
ALOX5	19.8249	2.35714	0	25.2697	58.0674	3.75616	13.723	6.92544	22.955	16.9865	1.15196	2.22215	0.347211	0.517621	16.9865	1.3436	2.53784	0.27248	0.382195
ALPK1	10.6749	8.64286	10.1145	5.22822	0.936572	0	6.8615	3.46272	5.73875	5.74001	0.525637	1.43957	0.709714	0.818518	5.74001	-0.269818	0.829424	0.850698	0.899371
ALPK3	446.06	1058.36	158.039	556.805	797.022	200.328	599.523	799.888	212.334	536.484	1.49033	2.80954	4.20866e-13	8.02916e-12	536.484	2.21995	4.65877	2.01109e-27	4.49353e-26
ALPL	3114.8	2489.93	1413.5	3621.41	3090.69	1709.05	3147.71	2605.7	1794.79	2554.18	1.00747	2.01038	1.37365e-13	2.7923e-12	2554.18	0.735449	1.66492	6.86408e-08	3.74518e-07
ALPP	4.57498	0	0	0	0.936572	3.75616	0	0	0	1.02974	0.28385	1.21744	0.941532	0.968214	1.02974	-2.03775	0.243543	0.616474	0.71439
ALPPL2	5.33747	6.28571	0	0	21.5411	40.0657	8.57687	15.5822	25.8244	13.6904	-2.24083	0.211565	0.0835709	0.185344	13.6904	-0.604004	0.657926	0.63242	0.727741
ALS2	170.799	201.143	145.396	233.527	217.285	165.271	149.238	228.539	195.117	189.591	0.13113	1.09515	0.619364	0.750973	189.591	0.356371	1.2802	0.175924	0.27165
ALS2CL	99.887	100.571	35.4008	57.5104	50.5749	5.00821	60.8958	110.807	47.3446	63.1111	1.32256	2.50109	0.0285936	0.0791088	63.1111	1.58551	3.00114	0.00858612	0.0212427
ALX1	10.6749	7.07143	22.7577	5.22822	13.112	8.76437	16.2961	0	32.9978	12.9892	-0.999698	0.500105	0.35142	0.522287	12.9892	-1.67893	0.312314	0.123234	0.204781
ALX3	8.38745	8.64286	0	0.87137	27.1606	2.5041	6.00381	2.59704	2.86937	6.55962	1.52433	2.87654	0.316783	0.485869	6.55962	2.84738	7.19693	0.057805	0.109845
ALYREF	344.648	234.929	232.634	154.232	159.217	211.597	476.017	280.48	196.552	254.478	0.605298	1.52129	0.0811208	0.181205	254.478	0.0745108	1.053	0.830607	0.8845
AMACR	6.09997	4.71428	2.52863	11.3278	8.42914	6.26026	8.57687	9.52247	2.86937	6.7032	1.14925	2.21799	0.315077	0.483976	6.7032	0.950283	1.93225	0.408424	0.523584
AMBP	58.7122	77.7857	82.1804	47.9253	59.004	26.2931	57.4651	106.479	67.4303	64.8083	-0.0981223	0.934248	0.836593	0.905772	64.8083	0.469958	1.38507	0.319831	0.434248
AMBRA1	313.386	670.214	274.356	383.403	354.961	140.23	279.606	684.752	146.338	360.805	0.798265	1.73901	0.00870475	0.0295825	360.805	1.60734	3.0469	1.13857e-07	6.05358e-07
AMD1	685.484	670.214	876.17	700.581	574.118	555.911	717.884	636.274	784.773	689.046	-0.0751053	0.949273	0.67719	0.794492	689.046	-0.236566	0.848763	0.190671	0.289823
AMDHD2	508.585	626.214	835.712	374.689	588.167	456.999	406.544	526.333	352.933	519.575	-0.352065	0.783462	0.185125	0.330803	519.575	0.0801128	1.0571	0.762501	0.833566
AMER1	163.174	251.429	61.9514	245.726	371.819	83.8875	280.464	310.779	35.8672	200.566	1.91632	3.7746	9.26811e-09	1.0555e-07	200.566	2.35472	5.11496	1.48144e-12	1.23981e-11
AMFR	145.637	199.571	84.7091	193.444	300.639	113.937	144.091	240.659	94.6893	168.597	0.718775	1.64578	0.0123546	0.0394737	168.597	1.33498	2.52272	2.87566e-06	1.30061e-05
AMH	44.2248	58.1428	24.022	18.2988	35.5897	31.3013	62.6112	74.4484	43.0406	43.52	0.351104	1.27554	0.54235	0.690186	43.52	0.77806	1.71482	0.174916	0.270273
AMHR2	8.38745	0.785714	0	5.22822	0	0	3.43075	0	1.43469	2.14076	3.63455	12.4197	0.147892	0.283626	2.14076	-0.740859	0.598383	0.798083	0.860643
AMICA1	9.91245	3.92857	0	0	0	31.3013	0.857687	16.4479	0	6.93866	-1.5344	0.345223	0.456904	0.619112	6.93866	-0.621421	0.65003	0.761234	0.832512
AMIGO1	17.5374	22	20.229	20.0415	32.78	86.3916	35.1652	38.0899	21.5203	32.6394	-0.821515	0.565847	0.228043	0.385582	32.6394	-0.469003	0.722464	0.489263	0.60143
AMIGO2	57.9497	41.6428	59.4228	64.4814	69.3063	33.8054	80.6226	59.7319	76.0384	60.3335	0.265546	1.20209	0.551904	0.69799	60.3335	0.0134418	1.00936	0.976097	0.988235
AMIGO3	181.474	201.929	112.524	213.486	304.386	254.167	192.98	283.077	129.122	208.127	0.243893	1.18418	0.443808	0.608169	208.127	0.668478	1.5894	0.0352206	0.0724727
AMMECR1	384.298	326.857	314.814	352.905	273.479	82.6355	438.278	329.824	142.034	293.903	1.12274	2.17761	0.00135944	0.00594891	293.903	0.785277	1.72342	0.0253401	0.0547306
AMMECR1L	166.224	266.357	70.8016	176.888	229.46	123.953	173.253	331.555	159.25	188.638	0.547849	1.4619	0.0732704	0.16687	188.638	1.22841	2.34308	5.30667e-05	0.000200156
AMN	9.14995	0	6.32157	6.97096	4.68286	22.5369	9.43456	7.79111	2.86937	7.75081	-0.316948	0.802767	0.802802	0.883851	7.75081	-1.36046	0.389459	0.295032	0.406818
AMN1	56.4247	5.5	87.2377	32.2407	10.3023	108.929	50.6036	18.1793	104.732	52.6832	-1.1097	0.46339	0.0210573	0.0616828	52.6832	-3.15304	0.112419	1.48625e-09	9.5549e-09
AMOT	67.8621	139.071	24.022	67.0955	112.389	40.0657	80.6226	148.897	50.214	81.1376	0.920585	1.89288	0.0184606	0.0554318	81.1376	1.81451	3.5174	2.61454e-06	1.18938e-05
AMOTL1	565.009	870.571	212.405	677.926	691.19	93.9039	597.808	864.814	222.376	532.889	1.80236	3.4879	2.21952e-12	3.93318e-11	532.889	2.20137	4.59917	8.92374e-18	1.10505e-16
AMOTL2	190.624	393.643	369.18	236.141	310.005	137.726	284.752	255.375	91.8199	252.141	0.246778	1.18655	0.529254	0.67968	252.141	0.678078	1.60001	0.0832981	0.148589
AMPD2	385.06	745.643	304.7	468.797	466.413	478.284	432.274	577.408	154.946	445.947	0.453251	1.36912	0.139692	0.272294	445.947	0.930356	1.90575	0.00238856	0.0066905
AMPD3	28.2123	27.5	7.58589	45.3112	18.7314	2.5041	23.1576	49.3437	14.3469	24.077	1.99991	3.99975	0.00950035	0.0317333	24.077	1.98479	3.95804	0.0101119	0.0245703
AMPH	48.7997	52.6428	29.0792	40.083	29.9703	35.0575	34.3075	39.8213	87.5159	44.1419	-0.293258	0.816057	0.59105	0.729284	44.1419	-0.300825	0.811788	0.581901	0.685239
AMT	1346.57	1048.93	1021.57	1180.71	1588.43	901.478	1055.81	1208.49	1041.58	1154.84	0.273822	1.20901	0.110589	0.229048	1154.84	0.375116	1.29694	0.0287896	0.0609794
AMY2B	3.04998	0	10.1145	0.87137	0	17.5287	0	0	2.86937	3.826	-2.94466	0.129888	0.105445	0.220644	3.826	-8.33069	0.00310608	0.0078219	0.0195518
AMZ1	12.9624	28.2857	61.9514	39.2116	21.5411	1.25205	30.8767	31.1645	17.2162	27.1624	0.0431725	1.03038	0.961239	0.980254	27.1624	0.00927715	1.00645	0.991675	0.998597
AMZ2	579.497	450.214	1083.52	538.506	569.436	1078.02	478.59	513.348	1047.32	704.272	-1.00672	0.497677	4.90216e-11	7.41638e-10	704.272	-1.06677	0.477388	3.58235e-12	2.90349e-11
AMZ2P1	194.436	39.2857	265.506	171.66	112.389	300.493	176.684	24.239	513.618	199.812	-0.991132	0.503083	0.0185221	0.0555833	199.812	-2.62222	0.162417	9.95633e-10	6.49472e-09
ANAPC1	227.986	515.428	182.061	225.685	278.162	187.808	228.145	437.168	212.334	277.197	0.228728	1.1718	0.365869	0.536728	277.197	1.08198	2.11694	1.60398e-05	6.57464e-05
ANAPC10	143.349	26.7143	321.136	118.506	73.9892	376.868	112.357	57.1348	286.937	168.555	-1.3959	0.380009	2.06935e-05	0.000137664	168.555	-2.64913	0.159416	4.6777e-15	4.74259e-14
ANAPC11	8687.12	5331.86	16903.9	7109.51	5872.3	17858	7007.31	5850.26	19346.7	10440.8	-1.24644	0.421486	4.10588e-28	2.9357e-26	10440.8	-1.66574	0.315182	9.33416e-49	5.54153e-47
ANAPC13	348.461	193.286	729.509	369.461	292.21	663.588	281.321	189.584	799.12	429.616	-1.13301	0.455963	1.13536e-07	1.09507e-06	429.616	-1.70092	0.30759	3.22568e-15	3.31333e-14
ANAPC15	531.46	423.5	788.932	356.39	402.726	807.574	445.997	406.869	809.163	552.512	-0.849775	0.554871	1.35322e-06	1.1077e-05	552.512	-0.963915	0.512664	4.5875e-08	2.54269e-07
ANAPC16	1266.51	699.286	2717.01	1199.88	721.16	2589.24	1146.73	785.171	2579.57	1522.73	-1.12587	0.458226	4.08019e-23	1.92812e-21	1522.73	-1.83831	0.279649	2.34397e-57	1.89885e-55
ANAPC2	93.787	118.643	103.674	121.992	158.281	51.3341	211.849	59.7319	81.7771	111.23	0.852449	1.80556	0.0543888	0.132625	111.23	0.50737	1.42146	0.253769	0.362134
ANAPC4	199.011	249.857	313.55	293.652	106.769	269.191	183.545	264.032	167.858	227.496	-0.152167	0.899898	0.664499	0.784809	227.496	-0.274128	0.82695	0.43523	0.549552
ANAPC5	1622.59	1413.5	1551.31	1395.93	1700.81	1377.26	1381.73	1239.65	1503.55	1465.15	-0.0100955	0.993027	0.944854	0.969921	1465.15	-0.0258967	0.98221	0.859232	0.905426
ANAPC7	995.057	923.214	1308.57	941.079	706.175	1050.47	904.003	900.307	1331.39	1006.7	-0.377332	0.76986	0.0155493	0.048028	1006.7	-0.543855	0.685936	0.000501757	0.00160564
ANG	39.6498	45.5714	88.502	33.112	23.4143	31.3013	44.5997	15.5822	63.1262	42.7621	-0.639741	0.641828	0.25933	0.422371	42.7621	-1.10835	0.463825	0.0529949	0.102313
ANGEL1	131.149	182.286	59.4228	168.174	208.855	33.8054	152.668	208.629	44.4753	132.163	1.71376	3.28014	5.90556e-08	5.93261e-07	132.163	2.12219	4.35355	1.56353e-11	1.18928e-10
ANGEL2	144.874	205.857	185.854	216.1	177.949	138.978	190.407	185.255	230.984	186.251	-0.0105918	0.992685	0.969426	0.985155	186.251	0.0365756	1.02568	0.894715	0.931853
ANGPT1	9.91245	5.5	12.6431	8.7137	14.0486	1.25205	5.14612	12.1195	21.5203	10.0951	-0.5659	0.675534	0.59525	0.732208	10.0951	-0.157413	0.896632	0.881702	0.922274
ANGPT2	0	0	17.7004	0	0	0	0	0	0	1.96671	-7.59728	0.00516405	0.0691209	0.159626	1.96671	-7.54385	0.00535889	0.0711058	0.130433
ANGPT4	1.52499	12.5714	0	2.61411	0	0	0	0	0	1.85673	4.83434	28.5286	0.223253	0.37967	1.85673	6.44143	86.9089	0.1016	0.174936
ANGPTL2	183.762	261.643	173.211	214.357	352.151	345.566	237.579	351.466	189.379	256.568	-0.157561	0.89654	0.582094	0.722782	256.568	0.444947	1.36126	0.118211	0.198124
ANGPTL4	66.3371	65.2143	116.317	64.4814	156.407	60.0985	67.7573	112.538	21.5203	81.1857	0.000573105	1.0004	0.999124	1	81.1857	0.749979	1.68177	0.148249	0.23694
ANGPTL6	0.762496	2.35714	1.26431	0	3.74629	7.51231	1.71537	0	4.30406	2.40689	-2.3997	0.189504	0.251691	0.413328	2.40689	-1.10391	0.465254	0.580086	0.683934
ANK1	78.5371	40.8571	31.6079	60.1245	60.8772	26.2931	52.3189	52.8064	54.5181	50.8823	0.771774	1.70737	0.101541	0.214551	50.8823	0.463363	1.37875	0.328362	0.443141
ANK2	173.087	341.786	109.995	170.788	223.841	143.986	215.28	227.674	80.3424	187.42	0.738559	1.66851	0.0135932	0.0428814	187.42	1.24446	2.36931	2.9449e-05	0.00011597
ANK3	225.699	433.714	179.533	268.382	250.065	189.06	325.064	315.973	454.796	293.587	-0.00537638	0.99628	0.987325	0.995925	293.587	0.283171	1.21687	0.402102	0.517294
ANKAR	3.81248	2.35714	12.6431	13.9419	1.87314	1.25205	8.57687	0	4.30406	5.41787	0.528238	1.44217	0.705235	0.815181	5.41787	-2.10122	0.233061	0.166487	0.260032
ANKDD1A	86.9245	22	31.6079	61.8672	44.9554	42.5698	69.4727	52.8064	103.297	57.2779	0.304251	1.23478	0.566157	0.710559	57.2779	-0.564972	0.675969	0.292726	0.404494
ANKDD1B	5.33747	0	0	0.87137	0	0	2.57306	0	0	0.975767	5.92143	60.6077	0.158106	0.296708	0.975767	0	1	1	1
ANKEF1	81.5871	76.2143	88.502	101.95	116.135	204.085	83.1957	160.151	45.91	106.414	-0.346951	0.786244	0.464862	0.625227	106.414	0.0549024	1.03879	0.907644	0.940648
ANKFY1	344.648	634.071	159.304	387.76	487.954	167.775	352.51	596.453	120.514	361.221	1.27398	2.41827	1.41289e-09	1.79559e-08	361.221	1.93835	3.83267	1.88281e-20	2.82211e-19
ANKH	60.2372	68.3571	40.4581	38.3403	29.9703	40.0657	55.7497	48.478	21.5203	44.7974	0.593425	1.50882	0.254103	0.416415	44.7974	0.523464	1.4374	0.31532	0.429151
ANKHD1	143.349	284.429	141.603	124.606	206.046	133.97	153.526	196.509	157.815	171.317	-0.0389173	0.973385	0.884252	0.935568	171.317	0.666818	1.58757	0.0117086	0.027942
ANKHD1-EIF4EBP3	6.86246	11.7857	1.26431	6.97096	4.68286	5.00821	9.43456	4.3284	7.17343	6.3901	0.800132	1.74126	0.502977	0.657976	6.3901	0.644557	1.56326	0.590999	0.692482
ANKIB1	170.037	288.357	151.718	233.527	225.714	234.134	234.149	285.674	111.906	215.024	0.354013	1.27811	0.230186	0.388127	215.024	0.681931	1.60429	0.0204735	0.045492
ANKK1	4.57498	3.14286	0	0	0	0	0	0	0	0.857537	4.98493	31.6674	0.278833	0.443598	0.857537	4.44693	21.8102	0.336187	0.451461
ANKLE1	131.149	646.643	221.255	171.66	602.216	244.15	162.103	559.229	83.2118	313.513	-0.243136	0.844907	0.435201	0.600511	313.513	1.7171	3.28774	2.27206e-08	1.29736e-07
ANKLE2	898.22	1204.5	1017.77	793.818	1377.7	494.561	1033.51	1437.03	1120.49	1041.96	0.0506666	1.03574	0.82885	0.900353	1041.96	0.610934	1.52725	0.00902498	0.0222013
ANKMY1	4.57498	21.2143	0	20.0415	1.87314	0	19.7268	44.1497	2.86937	12.7166	4.02648	16.2963	0.00825971	0.0282981	12.7166	4.63073	24.7736	0.002321	0.00651791
ANKMY2	94.5495	74.6428	92.2949	113.278	29.0337	260.427	76.3342	88.2993	133.426	106.921	-0.775511	0.584182	0.0911907	0.198433	106.921	-1.33873	0.395369	0.00380766	0.0102248
ANKRA2	49.5622	43.2143	140.339	67.0955	19.668	53.8382	42.8844	34.6272	104.732	61.7734	-0.905894	0.533702	0.0597684	0.142821	61.7734	-1.6112	0.327325	0.000983573	0.00297551
ANKRD10	868.483	565.714	934.328	819.959	490.764	952.812	858.545	438.899	714.474	738.22	-0.0314003	0.97847	0.849459	0.914344	738.22	-0.799189	0.574672	1.70476e-06	7.95763e-06
ANKRD11	4975.29	7729.07	2939.53	7638.43	7591.85	2858.44	7996.22	10394.2	3017.15	6126.69	1.22523	2.33793	5.00742e-13	9.48699e-12	6126.69	1.54461	2.91724	8.18957e-20	1.18346e-18
ANKRD12	1099.52	849.357	950.764	1360.21	783.91	585.96	1300.25	940.128	832.118	966.913	0.666639	1.58737	0.000254886	0.00132856	966.913	0.119922	1.08668	0.512098	0.622521
ANKRD13A	93.0245	128.857	118.846	77.5519	86.1646	47.578	109.784	90.8963	40.1712	88.097	0.437362	1.35413	0.321932	0.491202	88.097	0.564275	1.47864	0.200931	0.301764
ANKRD13B	312.623	347.286	195.969	346.805	476.715	209.093	369.663	517.676	110.471	320.7	0.99356	1.99109	0.000136531	0.000754958	320.7	1.37596	2.5954	1.18522e-07	6.29147e-07
ANKRD13C	59.4747	43.2143	44.251	77.5519	45.892	112.685	78.9072	51.0751	21.5203	59.3968	0.269909	1.20573	0.614304	0.746513	59.3968	-0.353037	0.782934	0.513304	0.623709
ANKRD13D	433.098	341.786	371.708	425.228	270.669	282.964	437.421	341.943	276.894	353.523	0.475189	1.3901	0.0179256	0.0540992	353.523	0.0349182	1.0245	0.862825	0.907704
ANKRD16	240.949	238.071	247.806	143.776	268.796	279.208	210.133	233.733	190.813	228.143	-0.27134	0.828549	0.300593	0.467819	228.143	0.0432366	1.03042	0.868531	0.911719
ANKRD17	840.27	2144.21	809.161	1075.27	1417.03	911.494	1097.84	1933.93	593.96	1202.57	0.379402	1.3008	0.0526599	0.129214	1202.57	1.24677	2.37309	1.67893e-10	1.1754e-09
ANKRD18A	38.8873	55.7857	74.5945	53.1535	63.6869	71.367	39.4536	49.3437	44.4753	54.5275	-0.538399	0.688534	0.209643	0.363094	54.5275	-0.177469	0.884253	0.67713	0.764532
ANKRD18B	102.174	162.643	154.246	157.718	194.807	35.0575	118.361	208.629	156.381	143.335	0.131379	1.09534	0.761738	0.856005	143.335	0.713386	1.63965	0.0984232	0.170483
ANKRD19P	17.5374	18.8571	22.7577	12.1992	23.4143	31.3013	14.5807	12.9852	18.6509	19.1426	-0.714845	0.609271	0.292832	0.458674	19.1426	-0.399917	0.757902	0.553424	0.659293
ANKRD23	39.6498	34.5714	5.05726	44.4399	13.112	0	46.3151	22.5077	35.8672	26.8356	1.68751	3.22099	0.068248	0.158232	26.8356	0.796426	1.73679	0.392858	0.508225
ANKRD24	520.785	471.428	396.995	621.287	572.245	509.585	750.476	639.737	304.153	531.855	0.642626	1.56117	0.00388264	0.0149882	531.855	0.473696	1.38866	0.0335702	0.0696563
ANKRD26	157.837	201.929	400.788	266.639	294.083	416.933	292.471	379.168	461.969	319.091	-0.836787	0.559889	0.00264103	0.0107054	319.091	-0.548604	0.683681	0.0481756	0.0944389
ANKRD27	224.936	335.5	73.3302	196.93	237.889	100.164	240.152	231.136	90.3852	192.269	1.32741	2.50952	1.07271e-06	8.92752e-06	192.269	1.60959	3.05166	3.02915e-09	1.88834e-08
ANKRD28	134.962	258.5	245.277	200.415	195.743	190.312	205.845	309.048	153.511	210.401	-0.124915	0.917058	0.665244	0.785321	210.401	0.372829	1.29489	0.194282	0.293961
ANKRD29	28.2123	17.2857	32.8722	28.7552	6.556	45.0739	17.1537	4.3284	25.8244	22.8958	-0.486651	0.71368	0.483255	0.641621	22.8958	-1.87176	0.27324	0.00955831	0.0233595
ANKRD33	3.81248	0	1.26431	0.87137	12.1754	0	3.43075	0	0	2.39493	2.65956	6.3184	0.338615	0.509181	2.39493	3.23645	9.42471	0.242258	0.349714
ANKRD33B	115.899	224.714	68.273	141.162	173.266	130.213	154.384	236.33	48.7793	143.669	0.729498	1.65806	0.0419722	0.108085	143.669	1.35507	2.55809	0.000145772	0.000513104
ANKRD34A	0.762496	3.92857	1.26431	0	0	1.25205	3.43075	24.239	0	3.87525	0.709516	1.63526	0.750548	0.849024	3.87525	3.46122	11.0137	0.107772	0.183355
ANKRD34B	35.0748	7.85714	79.6518	44.4399	7.49257	12.5205	39.4536	32.8958	14.3469	30.4148	0.156465	1.11455	0.84555	0.912166	30.4148	-1.14554	0.452021	0.160981	0.252898
ANKRD35	1226.86	1032.43	1180.87	1047.39	1198.81	915.25	1139.01	1070.85	1520.77	1148.02	-0.0825995	0.944355	0.639052	0.766264	1148.02	-0.130753	0.913354	0.458082	0.571603
ANKRD36	22.1124	33	41.7224	27.0125	74.9257	68.8629	52.3189	76.1798	58.8221	50.5507	-0.741758	0.59801	0.162711	0.302587	50.5507	0.118078	1.08529	0.821859	0.878313
ANKRD36B	45.7498	47.9286	103.674	53.1535	44.9554	55.0903	35.1652	31.1645	129.122	60.667	-1.10033	0.466409	0.0148919	0.0462945	60.667	-1.21186	0.431712	0.00755026	0.0189448
ANKRD36C	31.2623	64.4286	197.233	59.2531	67.4332	105.172	55.7497	89.165	113.34	87.0042	-1.51097	0.350876	0.000197757	0.00105863	87.0042	-0.912555	0.531244	0.0229891	0.0503001
ANKRD37	16.7749	6.28571	12.6431	13.9419	5.61943	3.75616	6.00381	13.8509	0	8.76399	1.15151	2.22147	0.335054	0.505687	8.76399	0.638595	1.55681	0.595833	0.696805
ANKRD39	820.446	574.357	1327.53	836.515	694	1631.42	741.9	496.9	1536.55	962.18	-0.906015	0.533657	1.09477e-08	1.23566e-07	962.18	-1.34919	0.392513	2.64707e-17	3.15442e-16
ANKRD40	339.311	389.714	217.462	366.847	292.21	338.054	333.64	368.779	157.815	311.537	0.541165	1.45515	0.0408271	0.105888	311.537	0.55688	1.47108	0.0353793	0.0727265
ANKRD42	42.6998	21.2143	1.26431	47.054	7.49257	86.3916	45.4574	19.9106	25.8244	33.0343	0.251044	1.19007	0.771854	0.862598	33.0343	-1.22124	0.428915	0.165012	0.258131
ANKRD44	3.04998	0.785714	0	7.84233	13.112	0	1.71537	8.65679	0	3.90691	6.43916	86.7722	0.0371029	0.0979543	3.90691	7.27626	155.015	0.0181397	0.0410892
ANKRD45	14.4874	0	32.8722	12.1992	3.74629	6.26026	3.43075	11.2538	0	9.3611	-0.380448	0.768199	0.793467	0.877273	9.3611	-1.39111	0.381272	0.345462	0.460682
ANKRD46	68.6246	36.9286	65.7443	45.3112	33.7166	33.8054	56.6074	53.6721	45.91	48.9245	0.230448	1.1732	0.624543	0.754747	48.9245	-0.226595	0.85465	0.633623	0.72853
ANKRD49	42.6998	20.4286	37.9294	45.3112	16.8583	36.3095	48.0305	38.9556	100.428	42.9945	-0.356215	0.781211	0.526119	0.676891	42.9945	-1.19073	0.438081	0.0371879	0.0757437
ANKRD50	91.4995	154.786	120.11	95.8507	190.124	101.416	87.4841	168.807	81.7771	121.317	-0.144611	0.904624	0.625487	0.7555	121.317	0.757105	1.6901	0.0094042	0.0230205
ANKRD52	237.136	355.928	107.467	244.855	201.363	52.5862	215.28	319.436	193.683	214.193	0.98363	1.97743	0.00836361	0.0286019	214.193	1.31469	2.48749	0.000415468	0.00134947
ANKRD53	14.4874	3.92857	30.3435	7.84233	11.2389	0	7.71919	15.5822	4.30406	10.6051	-0.206941	0.866372	0.866144	0.924798	10.6051	-0.178199	0.883806	0.884635	0.924669
ANKRD54	426.998	451	504.461	435.685	589.104	226.621	396.252	287.406	192.248	389.975	0.446086	1.36234	0.171272	0.313873	389.975	0.522272	1.43622	0.109169	0.185157
ANKRD6	124.287	77.7857	88.502	79.2946	117.071	45.0739	90.0572	113.404	259.678	110.573	-0.417129	0.748913	0.406313	0.574237	110.573	-0.348545	0.785376	0.487718	0.600069
ANKRD61	0.762496	7.07143	0	0	0	0	0.857687	0	0	0.965734	3.48551	11.2006	0.450999	0.614405	0.965734	5.61183	48.9021	0.216005	0.319188
ANKRD65	18.2999	7.85714	1.26431	15.6847	51.5114	32.5534	12.8653	32.0301	43.0406	23.9008	-0.709968	0.611334	0.445675	0.609564	23.9008	0.250501	1.18962	0.785779	0.851615
ANKRD9	259.249	227.857	70.8016	169.917	177.012	145.238	293.329	260.57	218.072	202.449	0.738127	1.66801	0.0409307	0.106056	202.449	0.619587	1.53644	0.0865409	0.153474
ANKS1A	791.471	1523.5	429.867	900.125	1359.9	345.566	946.887	1316.7	327.108	882.347	1.25736	2.39058	2.61682e-15	6.31917e-14	882.347	1.92859	3.80682	3.75989e-34	1.17999e-32
ANKS1B	15.2499	7.07143	32.8722	20.9129	13.112	5.00821	19.7268	25.9704	20.0856	17.7788	-0.0528577	0.964025	0.949767	0.973081	17.7788	-0.330049	0.79551	0.695679	0.779853
ANKS3	1025.56	546.857	648.593	941.951	754.877	301.745	876.557	491.706	622.654	690.055	0.85527	1.8091	0.000651978	0.00310057	690.055	0.189502	1.14037	0.451459	0.56517
ANKS4B	4.57498	0	0	0.87137	0.936572	0	6.00381	0	1.43469	1.53571	3.04885	8.27553	0.283283	0.448144	1.53571	-0.613594	0.653567	0.845411	0.895452
ANKS6	682.434	833.643	223.784	556.805	583.484	631.034	796.792	864.814	463.404	626.244	0.627273	1.54464	0.0290063	0.0801026	626.244	0.792	1.73147	0.00581878	0.0149869
ANKZF1	308.811	400.714	193.44	355.519	277.225	212.849	311.341	387.824	252.505	300.025	0.567787	1.48225	0.0114764	0.0371295	300.025	0.696479	1.62055	0.00191228	0.00546723
ANLN	339.311	344.143	399.523	460.955	376.502	292.98	552.351	424.183	377.322	396.363	0.338091	1.26408	0.131807	0.260744	396.363	0.0979462	1.07025	0.663318	0.75375
ANO1	73.1996	126.5	39.1937	61.8672	87.1012	21.2849	114.072	69.2544	73.169	73.9603	0.905088	1.87266	0.0645443	0.151568	73.9603	1.08951	2.12802	0.025893	0.0557708
ANO10	338.548	602.643	370.444	372.946	455.174	315.517	291.614	573.945	493.532	423.818	-0.232076	0.851409	0.284718	0.449735	423.818	0.470442	1.38553	0.0290314	0.0614363
ANO1-AS2	0	0	0	6.97096	0	0	2.57306	0	0	1.06045	6.03788	65.7025	0.17942	0.323881	1.06045	0	1	1	1
ANO2	25.9249	38.5	37.9294	27.8838	50.5749	23.789	34.3075	31.1645	0	30.0082	0.505307	1.41943	0.534573	0.684392	30.0082	0.953539	1.93662	0.239554	0.346724
ANO4	32.7873	56.5714	31.6079	44.4399	53.3846	21.2849	29.1614	55.4035	14.3469	37.6653	0.655337	1.57498	0.214951	0.370066	37.6653	1.2926	2.44969	0.0135142	0.0317306
ANO5	158.599	198	140.339	169.046	94.5937	176.539	202.414	185.255	137.73	162.502	0.220432	1.16508	0.487385	0.64515	162.502	0.0732229	1.05206	0.81799	0.87553
ANO6	404.885	691.428	356.537	692.739	658.41	247.906	893.71	766.992	318.5	559.012	1.10908	2.15708	1.1265e-05	7.90666e-05	559.012	1.19792	2.29408	2.09708e-06	9.64657e-06
ANO7	16.0124	23.5714	10.1145	16.556	12.1754	31.3013	16.2961	6.92544	15.7815	16.526	-0.229281	0.85306	0.773821	0.864034	16.526	-0.420013	0.747418	0.600449	0.700758
ANO8	67.0996	77.7857	27.8149	64.4814	65.56	40.0657	65.1842	100.419	31.5631	59.997	0.983569	1.97735	0.0181924	0.0548038	59.997	1.29297	2.45032	0.00182459	0.00524388
ANO9	62.5247	98.2143	73.3302	48.7967	100.213	37.5616	51.4612	97.8218	67.4303	70.8171	-0.128344	0.914881	0.745577	0.845121	70.8171	0.734159	1.66343	0.0596121	0.112642
ANOS1	1938.26	2728.79	1279.49	1887.39	2682.34	1627.67	2217.12	2846.35	1274	2053.49	0.530811	1.44474	6.11605e-05	0.000367477	2053.49	0.981371	1.97434	1.12678e-13	1.03461e-12
ANP32A	1833.8	1747.43	2395.88	1734.03	1355.22	2039.59	1696.51	1515.8	1941.13	1806.6	-0.276686	0.825485	0.0412919	0.106785	1806.6	-0.465166	0.724388	0.000614708	0.00193768
ANP32A-IT1	1.52499	8.64286	5.05726	9.58507	7.49257	0	1.71537	1.73136	0	3.97216	1.32198	2.50009	0.466588	0.62678	3.97216	1.80522	3.49482	0.31758	0.431763
ANP32AP1	3.04998	3.14286	8.8502	6.97096	0.936572	0	1.71537	0.865679	2.86937	3.15567	-0.00159743	0.998893	0.999264	1	3.15567	-1.2342	0.425077	0.491017	0.603055
ANP32B	541.372	792.786	883.756	392.988	531.036	656.075	530.909	597.319	502.14	603.153	-0.479269	0.717341	0.0385526	0.1011	603.153	-0.0881907	0.940702	0.702774	0.785815
ANP32E	763.258	908.285	867.32	885.312	545.085	816.338	792.503	760.067	790.512	792.076	-0.019765	0.986393	0.914698	0.953107	792.076	-0.159832	0.895129	0.387094	0.502746
ANPEP	29.7373	27.5	6.32157	33.9834	28.0971	23.789	45.4574	57.1348	14.3469	29.5964	1.2942	2.45241	0.0499679	0.124015	29.5964	1.34102	2.5333	0.0422599	0.0845455
ANTXR1	439.198	484.786	350.215	623.029	738.955	299.24	600.381	689.081	506.444	525.703	0.525634	1.43957	0.0278158	0.0773732	525.703	0.727778	1.65609	0.00229922	0.00646668
ANTXR2	15.2499	18.8571	35.4008	22.6556	26.224	7.51231	29.1614	47.6124	64.5609	29.6927	-0.677002	0.625464	0.3606	0.531845	29.6927	-0.209303	0.864955	0.776172	0.844318
ANXA11	1040.81	1151.07	1196.04	926.266	1169.78	682.369	785.642	922.814	833.553	967.593	0.0215621	1.01506	0.915187	0.953199	967.593	0.258095	1.1959	0.201985	0.302958
ANXA2	750.296	634.071	800.311	644.814	766.116	752.483	504.32	573.945	814.902	693.473	-0.317212	0.802619	0.0827236	0.183925	693.473	-0.262556	0.83361	0.150963	0.240421
ANXA2P2	6.86246	4.71428	10.1145	5.22822	4.68286	5.00821	3.43075	3.46272	8.60812	5.79024	-0.608164	0.656031	0.594468	0.731734	5.79024	-0.882439	0.54245	0.44475	0.558883
ANXA3	109.037	60.5	226.312	148.133	183.568	301.745	120.076	187.852	189.379	169.622	-0.928633	0.525356	0.0150185	0.0466086	169.622	-0.734928	0.600848	0.0539251	0.103792
ANXA4	135.724	103.714	201.026	114.149	153.598	202.832	127.795	90.8963	106.167	137.323	-0.435302	0.739539	0.19595	0.345249	137.323	-0.554471	0.680907	0.100391	0.173217
ANXA5	1235.24	1250.07	1857.28	1246.93	1257.82	2120.98	1027.51	1062.19	1723.06	1420.12	-0.700131	0.615516	7.38273e-07	6.34653e-06	1420.12	-0.675642	0.626053	1.78283e-06	8.27976e-06
ANXA6	534.51	1088.21	505.726	536.764	1119.2	544.643	418.551	906.366	460.534	679.39	-0.0206664	0.985777	0.903459	0.946812	679.39	1.04253	2.05983	6.36484e-10	4.23936e-09
ANXA7	417.085	430.571	611.928	360.747	353.087	508.333	289.898	295.197	441.883	412.081	-0.549021	0.683484	0.0128862	0.0409021	412.081	-0.534039	0.690618	0.0156095	0.0359925
ANXA9	19.0624	33	59.4228	28.7552	46.8286	17.5287	28.3037	26.8361	80.3424	37.7866	-1.04545	0.484495	0.086047	0.189623	37.7866	-0.558389	0.67906	0.355361	0.470714
AOAH	0.762496	0	0	0	0	0	0	6.05976	0	0.758028	2.42265	5.36156	0.613701	0.746004	0.758028	5.38418	41.7639	0.241247	0.348591
AOC1	1.52499	0	0	3.48548	0.936572	0	13.723	7.79111	0	3.05124	7.01091	128.971	0.0334945	0.0899147	3.05124	5.90896	60.086	0.0746441	0.135728
AOC2	24.3999	19.6429	20.229	38.3403	2.80971	13.7726	10.2922	9.52247	12.9122	16.8801	0.636697	1.55477	0.460523	0.621856	16.8801	-0.545003	0.68539	0.536233	0.643532
AOC3	4.57498	14.1429	5.05726	0.87137	6.556	7.51231	12.0076	0	2.86937	5.95464	0.172045	1.12665	0.908693	0.949826	5.95464	0.422461	1.34021	0.777632	0.84533
AOX1	47.2747	81.7143	78.3875	45.3112	39.336	8.76437	45.4574	58.8662	12.9122	46.4471	0.460449	1.37597	0.505027	0.659502	46.4471	0.843865	1.79485	0.220591	0.32462
AP1AR	166.987	116.286	152.982	179.502	108.642	176.539	197.268	92.6277	239.593	158.936	-0.0640227	0.956593	0.8142	0.890379	158.936	-0.839101	0.558992	0.00244445	0.00683191
AP1B1	1105.62	2304.5	580.32	1132.78	1770.12	852.648	933.164	2202.29	615.48	1277.44	0.630114	1.54769	0.00029608	0.001523	1277.44	1.61511	3.06335	1.21551e-20	1.84062e-19
AP1G1	290.511	445.5	218.726	304.108	528.226	162.767	368.806	496.034	263.982	342.073	0.579893	1.49474	0.0095338	0.031806	342.073	1.18922	2.2803	8.94962e-08	4.81441e-07
AP1G2	233.324	179.929	78.3875	222.199	131.12	86.3916	223.856	101.284	272.59	169.898	0.639424	1.55771	0.122545	0.247088	169.898	-0.080243	0.945898	0.847139	0.896804
AP1M1	398.785	499.714	288.264	386.017	394.297	214.101	293.329	386.959	147.773	334.36	0.727583	1.65586	0.00457266	0.0171958	334.36	0.976483	1.96766	0.000138066	0.000488069
AP1M2	1299.29	1186.43	1249.14	1090.08	1476.97	1161.9	1024.94	1096.82	1058.8	1182.71	-0.0232711	0.983999	0.882538	0.934536	1182.71	0.115246	1.08316	0.464086	0.577517
AP1S1	523.072	370.857	467.796	383.403	288.464	419.438	349.079	238.928	416.059	384.122	-0.0532488	0.963764	0.813961	0.890354	384.122	-0.536236	0.689567	0.018497	0.0417548
AP1S2	321.773	236.5	443.774	325.021	235.079	618.514	293.329	188.718	724.517	376.358	-0.925497	0.526499	1.96654e-05	0.000131463	376.358	-1.43525	0.369784	5.42793e-11	3.94966e-10
AP1S3	59.4747	63.6428	68.273	109.793	34.6531	62.6026	76.3342	53.6721	86.0812	68.2807	0.17916	1.13222	0.669226	0.787979	68.2807	-0.508783	0.702815	0.231236	0.337146
AP2A1	587.122	913	409.638	509.751	791.403	309.257	612.389	860.485	317.066	590.012	0.721827	1.64927	3.49963e-05	0.000222895	590.012	1.30747	2.47507	4.90624e-14	4.61046e-13
AP2A2	380.485	766.071	274.356	362.49	530.1	259.175	397.967	539.318	294.111	422.675	0.46386	1.37923	0.0211849	0.0619463	422.675	1.15063	2.2201	8.65693e-09	5.15622e-08
AP2B1	1078.93	2564.57	627.1	905.353	2023.93	1001.64	1145.87	2294.05	654.217	1366.19	0.45473	1.37053	0.0140334	0.0440335	1366.19	1.5915	3.01362	5.92909e-18	7.45442e-17
AP2M1	10012.3	8256.28	9766.83	9200.79	10106.5	9419.19	8744.12	7131.47	8952.44	9065.56	-0.00932306	0.993559	0.942098	0.968663	9065.56	-0.142477	0.905962	0.267123	0.376581
AP2S1	3736.99	2628.21	7210.38	3109.92	3150.63	7492.28	2988.18	2775.37	7794.65	4542.96	-1.1935	0.43724	2.61086e-23	1.24813e-21	4542.96	-1.39523	0.380185	3.50229e-31	9.51986e-30
AP3B1	257.724	408.571	280.678	263.154	345.595	358.087	225.572	450.153	288.372	319.767	-0.313227	0.80484	0.131364	0.260056	319.767	0.377166	1.29879	0.0666007	0.123394
AP3B2	68.6246	51.8571	54.3655	43.5685	4.68286	15.0246	71.1881	53.6721	17.2162	42.2444	1.08014	2.11424	0.148445	0.284487	42.2444	0.348372	1.27312	0.643191	0.736477
AP3D1	5355.77	8211.5	2177.15	4305.44	5819.86	2325.06	6729.42	8282.82	2137.68	5038.3	1.30357	2.4684	6.34158e-15	1.46266e-13	5038.3	1.74874	3.36064	1.26065e-25	2.54373e-24
AP3M1	142.587	259.286	178.268	128.091	145.169	231.63	141.518	263.167	130.556	180.03	-0.392505	0.761806	0.208024	0.360899	180.03	0.304176	1.23471	0.325443	0.43997
AP3M2	168.512	153.214	136.546	125.477	111.452	196.572	154.384	158.419	156.381	151.217	-0.126279	0.916191	0.660273	0.782178	151.217	-0.209564	0.864799	0.466784	0.580216
AP3S1	311.861	150.857	576.527	321.535	162.963	742.467	317.344	141.971	454.796	353.369	-0.900852	0.53557	2.28982e-05	0.000151108	353.369	-1.96195	0.256682	1.99177e-19	2.80434e-18
AP3S2	4.57498	0.785714	6.32157	5.22822	1.87314	2.5041	0.857687	0.865679	0	2.55679	0.263139	1.20009	0.886194	0.9372	2.55679	-1.34485	0.393696	0.486257	0.598791
AP4B1	100.649	120.214	139.075	87.137	127.374	205.337	61.7535	74.4484	38.7365	106.08	-0.62075	0.650333	0.200895	0.352003	106.08	-0.253552	0.838829	0.600331	0.70067
AP4E1	42.6998	77.7857	30.3435	43.5685	102.086	38.8136	48.0305	104.747	27.259	57.2594	0.474743	1.38967	0.262354	0.425736	57.2594	1.55777	2.94399	0.000179	0.000620889
AP4M1	102.937	94.2857	213.669	84.5229	115.198	130.213	128.653	148.897	321.37	148.861	-1.0715	0.475825	0.00271523	0.0109737	148.861	-0.891097	0.539204	0.0124919	0.029605
AP4S1	119.712	64.4286	204.819	81.0374	29.9703	155.254	124.365	83.1052	206.595	118.81	-0.800522	0.574141	0.0331811	0.0892627	118.81	-1.67109	0.314015	1.22615e-05	5.10612e-05
AP5B1	231.799	459.643	257.92	230.042	650.917	204.085	284.752	506.422	321.37	349.661	-0.0677361	0.954134	0.771527	0.862526	349.661	1.04681	2.06595	5.67707e-06	2.47638e-05
AP5M1	57.1872	77.7857	46.7796	82.7801	40.2726	339.306	70.3304	60.5976	229.55	111.621	-1.55019	0.341466	0.00304454	0.012114	111.621	-1.78286	0.290607	0.000681934	0.00213161
AP5S1	116.662	166.571	164.361	162.075	190.124	151.498	160.388	219.883	111.906	160.385	0.034495	1.0242	0.903173	0.946754	160.385	0.42815	1.34551	0.129073	0.212708
AP5Z1	324.823	298.571	197.233	304.108	280.971	229.126	237.579	340.212	228.115	271.193	0.405876	1.32489	0.0642383	0.151108	271.193	0.491524	1.40593	0.0249607	0.0540529
APAF1	100.649	94.2857	141.603	158.589	152.661	71.367	143.234	103.882	104.732	119	0.340273	1.266	0.345344	0.51582	119	0.141527	1.10307	0.695613	0.779832
APBA1	3.81248	0	0	0.87137	2.80971	0	6.8615	14.7166	0	3.23018	6.31478	79.6049	0.0545438	0.132944	3.23018	6.91531	120.702	0.0348649	0.0718669
APBA2	580.259	512.286	269.299	449.627	596.596	229.126	657.846	502.094	164.989	440.236	1.34478	2.53992	1.67576e-09	2.10848e-08	440.236	1.27718	2.42365	1.07579e-08	6.35697e-08
APBA3	616.859	589.286	615.721	565.519	615.328	460.755	529.193	597.319	474.881	562.762	0.141574	1.10311	0.403808	0.572105	562.762	0.215339	1.16098	0.204042	0.30546
APBB1	621.434	766.857	651.122	663.112	753.94	473.276	656.989	657.051	538.007	642.421	0.223633	1.16767	0.177417	0.321219	642.421	0.389561	1.30999	0.0186577	0.0420424
APBB2	310.336	264.786	364.122	266.639	354.961	419.438	307.91	308.182	484.924	342.366	-0.51827	0.698208	0.0115004	0.0371997	342.366	-0.451221	0.731423	0.0277628	0.059155
APBB3	19.0624	25.9286	8.8502	36.5975	14.9851	12.5205	18.0114	4.3284	7.17343	16.3842	1.36284	2.57191	0.112359	0.231949	16.3842	0.664254	1.58475	0.443956	0.558169
APC	235.611	475.357	241.484	363.361	407.409	341.81	339.644	447.556	298.415	350.072	0.08916	1.06375	0.694135	0.806831	350.072	0.593778	1.50919	0.00849859	0.0210544
APC2	147.924	293.071	54.3655	248.34	243.509	36.3095	205.845	288.271	61.6915	175.481	1.98598	3.96132	1.89596e-10	2.69017e-09	175.481	2.44164	5.43259	3.86657e-15	3.95188e-14
APCDD1	32.0248	30.6428	21.4933	54.8963	37.4629	33.8054	33.4498	28.5674	25.8244	33.1297	0.566977	1.48142	0.294994	0.461138	33.1297	0.251029	1.19006	0.645251	0.738424
APCDD1L	102.174	137.5	97.3522	54.8963	120.818	35.0575	90.9149	151.494	84.6465	97.2059	0.195284	1.14495	0.640198	0.76668	97.2059	0.918953	1.89074	0.0266906	0.0571818
APCDD1L-AS1	2.28749	3.92857	7.58589	5.22822	13.112	10.0164	7.71919	6.05976	4.30406	6.69351	-0.534209	0.690537	0.644792	0.770135	6.69351	0.0654488	1.04641	0.954347	0.974252
APEH	3015.67	4109.28	2720.8	2378.84	3723.81	2603.02	2561.91	3626.33	2374.41	3012.67	0.047617	1.03356	0.700114	0.811224	3012.67	0.573811	1.48845	3.30843e-06	1.48208e-05
APELA	113.612	117.857	170.682	128.963	52.448	116.441	80.6226	109.941	215.203	122.863	-0.634666	0.64409	0.0955135	0.205242	122.863	-0.837975	0.559428	0.0282993	0.0601403
APEX1	3350.41	2807.36	5135.64	3092.49	3735.98	4036.62	2869.82	2792.68	3995.6	3535.18	-0.499771	0.707219	0.00068951	0.00325347	3535.18	-0.496459	0.708844	0.000749768	0.00232158
APEX2	394.21	285.214	343.893	335.477	353.087	155.254	329.352	167.076	134.861	277.603	0.738865	1.66886	0.0320843	0.0868521	277.603	0.343289	1.26865	0.320542	0.434999
APH1A	521.547	437.643	557.563	498.423	308.132	545.895	435.705	347.137	494.967	460.779	-0.135127	0.91059	0.46922	0.629237	460.779	-0.547505	0.684202	0.00357303	0.00964518
APH1B	121.999	166.571	201.026	107.178	117.071	363.095	171.537	167.942	263.982	186.711	-1.04782	0.483697	0.000622306	0.00297754	186.711	-0.873969	0.545644	0.00424716	0.0112926
API5	234.086	214.5	294.585	259.668	336.229	291.728	247.014	203.435	164.989	249.582	-0.0225168	0.984514	0.936675	0.965865	249.582	0.00233708	1.00162	0.993422	0.99999
APIP	298.898	120.214	475.382	250.954	154.534	502.073	248.729	103.882	317.066	274.637	-0.697583	0.616604	0.00476447	0.0178356	274.637	-1.77631	0.291929	1.92126e-12	1.5933e-11
APITD1	144.874	67.5714	311.021	152.49	140.486	425.698	110.642	123.792	460.534	215.234	-1.55234	0.340956	2.26029e-07	2.08823e-06	215.234	-1.85388	0.276647	8.16137e-10	5.36211e-09
APITD1-CORT	8.38745	3.92857	5.05726	2.61411	4.68286	18.7808	13.723	10.3882	12.9122	8.9416	-0.570901	0.673196	0.591247	0.729407	8.9416	-0.952792	0.516632	0.37527	0.491034
APLF	38.1248	40.8571	64.48	67.0955	12.1754	26.2931	22.2999	6.05976	68.8649	38.4723	-0.323246	0.799269	0.648684	0.772568	38.4723	-1.42521	0.372365	0.0481222	0.0943568
APLN	70.1496	37.7143	5.05726	54.0249	29.0337	57.5944	69.4727	28.5674	10.0428	40.1841	1.40773	2.6532	0.0466203	0.117354	40.1841	0.385758	1.30655	0.589244	0.691164
APLNR	2.28749	14.1429	3.79294	8.7137	0	0	1.71537	14.7166	0	5.04099	1.72335	3.30202	0.36699	0.537748	5.04099	2.91124	7.52266	0.123643	0.205234
APLP1	513.16	487.928	327.457	589.046	623.757	271.695	561.785	487.378	428.971	476.797	0.696415	1.62047	0.000682532	0.00322536	476.797	0.638651	1.55687	0.00186034	0.00533634
APLP2	6620.75	8145.5	3969.95	8448.8	8558.39	4067.92	9199.56	10504.2	4271.06	7087.34	0.979398	1.97164	1.5506e-12	2.78989e-11	7087.34	1.14437	2.2105	1.43378e-16	1.62947e-15
APMAP	1477.72	1608.36	1306.04	1508.34	2307.71	1516.24	1325.98	1703.66	1060.23	1534.92	0.150841	1.11022	0.377067	0.547829	1534.92	0.532593	1.44653	0.00178914	0.00514919
APOA1	16.0124	24.3571	72.0659	13.0705	5.61943	46.3259	18.8691	37.2242	58.8221	32.4852	-1.88553	0.270644	0.00427683	0.0162807	32.4852	-1.39485	0.380285	0.0326253	0.0679316
APOA1BP	3903.22	2849	6032.04	3479.38	3904.57	5993.57	3196.6	3209.94	6542.17	4345.61	-0.811398	0.569829	9.27949e-10	1.20064e-08	4345.61	-0.898286	0.536524	1.2563e-11	9.64064e-11
APOA2	8.38745	0	13.9075	8.7137	6.556	6.26026	4.28844	10.3882	31.5631	10.0072	-1.26887	0.414985	0.277871	0.442661	10.0072	-1.61351	0.326802	0.17161	0.266188
APOA5	6.86246	0	0	7.84233	0	3.75616	2.57306	0	0	2.33711	2.18524	4.54804	0.350131	0.520936	2.33711	-5.32234	0.0249929	0.129244	0.21295
APOB	7.62496	10.2143	20.229	8.7137	5.61943	17.5287	11.1499	15.5822	0	10.7403	-0.466288	0.723825	0.673598	0.791519	10.7403	-0.271084	0.828696	0.806095	0.866534
APOBEC2	1.52499	2.35714	0	6.09959	7.49257	0	4.28844	6.92544	1.43469	3.34698	3.13167	8.76451	0.137919	0.269785	3.34698	3.62642	12.3499	0.0844587	0.150333
APOBEC3B	69.3871	36.1428	75.8589	54.0249	58.0674	72.619	28.3037	36.3585	55.9528	54.0795	-0.429535	0.742501	0.365339	0.536285	54.0795	-0.650645	0.636996	0.17257	0.267387
APOBEC3C	503.247	571.214	654.915	494.067	543.212	696.141	445.14	596.453	746.037	583.381	-0.539131	0.688185	0.000331365	0.0016824	583.381	-0.292988	0.81621	0.0503307	0.0978586
APOBEC3D	67.0996	61.2857	49.3083	46.1826	43.0823	37.5616	53.1766	75.3141	70.2996	55.9234	0.0879495	1.06286	0.845103	0.911863	55.9234	0.198095	1.14718	0.659593	0.751022
APOBEC3F	61.7622	76.2143	108.731	47.054	34.6531	12.5205	24.0152	79.6425	35.8672	53.3844	-0.24225	0.845426	0.717716	0.824509	53.3844	0.277929	1.21245	0.677101	0.764532
APOBEC3G	6.86246	3.92857	2.52863	8.7137	6.556	0	10.2922	0	0	4.32018	3.32843	10.0452	0.0796058	0.178526	4.32018	2.02261	4.06317	0.293673	0.405499
APOBEC3H	1.52499	0	10.1145	0	0	6.26026	0.857687	0	2.86937	2.40298	-2.9997	0.125026	0.158961	0.297718	2.40298	-7.66526	0.00492635	0.0194297	0.0435078
APOC1	1046.91	580.643	2279.56	897.511	826.993	2757.02	874.841	673.499	2704.38	1404.59	-1.45679	0.364303	1.17025e-20	4.56037e-19	1404.59	-1.89608	0.268672	1.55838e-33	4.74585e-32
APOC1P1	6.86246	5.5	29.0792	8.7137	1.87314	22.5369	6.00381	4.3284	21.5203	11.8242	-1.76252	0.294733	0.0393041	0.102743	11.8242	-2.63186	0.161336	0.00331539	0.00901332
APOC3	0	0	0	0	0	17.5287	0	0	0	1.94764	-7.58361	0.0052132	0.0702741	0.161812	1.94764	-7.53018	0.0054099	0.0722813	0.132294
APOE	56452.1	62164.1	47133.6	68391.2	109349	87583.6	47473	62632.8	72027	68134.1	-0.262788	0.833476	0.431849	0.59779	68134.1	0.179561	1.13254	0.591203	0.692671
APOL2	134.199	129.643	41.7224	135.934	81.4817	105.172	139.803	76.1798	83.2118	103.039	0.833574	1.78209	0.0320788	0.0868515	103.039	0.322648	1.25062	0.409852	0.524841
APOL3	0	7.07143	0	0	5.61943	0	0	0	0	1.4101	0	1	1	1	1.4101	6.45136	87.5089	0.118158	0.198071
APOL4	0	0	0	0	0	0	0	0	17.2162	1.91292	-7.55185	0.00532924	0.0731505	0.166707	1.91292	-7.49842	0.00553031	0.0752121	0.13657
APOL6	0.762496	3.14286	2.52863	3.48548	0	0	0.857687	11.2538	0	2.44789	0.989848	1.98598	0.679372	0.796479	2.44789	2.49199	5.62555	0.28886	0.400295
APOLD1	1.52499	7.85714	24.022	0.87137	3.74629	20.0328	0.857687	9.52247	24.3897	10.3138	-4.37979	0.0480342	0.00012338	0.000689663	10.3138	-1.69107	0.309697	0.0684072	0.126201
APOM	51.0872	36.1428	91.0306	50.5394	23.4143	95.156	64.3266	42.4183	154.946	67.6735	-1.03776	0.487083	0.0118452	0.0380979	67.6735	-1.73707	0.299978	3.6771e-05	0.000142685
APOO	895.17	356.714	1515.91	805.146	484.208	1736.6	749.619	450.153	1711.58	967.233	-1.01837	0.493672	3.5658e-11	5.48546e-10	967.233	-1.94426	0.259848	1.21152e-35	4.10794e-34
APOOL	107.512	86.4286	68.273	88.0083	107.706	48.83	103.78	56.2692	106.167	85.886	0.427267	1.34468	0.288954	0.454245	85.886	0.168655	1.12401	0.676835	0.764304
APOPT1	1151.37	809.286	1907.85	972.449	925.333	1934.42	1127.86	943.591	2108.99	1320.13	-0.871525	0.546569	2.02268e-11	3.17092e-10	1320.13	-1.15214	0.449956	1.07638e-18	1.43096e-17
APP	1537.19	1950.93	1019.04	1581.54	1769.18	939.039	1909.21	2062.05	902.418	1518.95	0.813211	1.75712	1.69038e-09	2.12525e-08	1518.95	1.01515	2.02111	5.14811e-14	4.83223e-13
APPBP2	47.2747	76.2143	111.26	53.1535	70.2429	92.6519	55.7497	81.3739	44.4753	70.2662	-0.67376	0.626871	0.105969	0.221346	70.2662	-0.128024	0.915084	0.756534	0.829192
APPL1	340.073	384.214	399.523	386.017	438.315	524.61	519.759	428.511	421.798	426.98	-0.112497	0.924986	0.590426	0.728982	426.98	-0.106254	0.928997	0.611398	0.709766
APPL2	169.274	108.429	103.674	119.378	50.5749	22.5369	144.949	102.15	27.259	94.2471	1.49546	2.81954	0.00410341	0.0157005	94.2471	0.765089	1.69947	0.144116	0.231783
APRT	12014.6	9631.28	19641.1	9515.36	11838.3	21511.5	9178.97	10058.3	20767.1	13795.2	-1.01167	0.495973	8.71986e-16	2.2618e-14	13795.2	-0.973832	0.509152	9.73389e-15	9.643e-14
APTR	352.273	99.7857	279.413	279.71	72.116	316.769	268.456	151.494	256.809	230.758	0.078076	1.05561	0.778849	0.867229	230.758	-1.39849	0.379326	8.83044e-07	4.27989e-06
APTX	539.085	344.143	984.901	439.17	386.804	826.355	507.751	265.764	803.424	566.377	-0.815088	0.568374	1.12579e-05	7.90505e-05	566.377	-1.39215	0.380995	1.06947e-13	9.83639e-13
AQP1	0	10.2143	0	0	0	0	0	0	0	1.13492	0	1	1	1	1.13492	6.14085	70.5634	0.180113	0.276974
AQP11	54.1372	68.3571	61.9514	56.639	41.2091	125.205	52.3189	31.1645	35.8672	58.5389	-0.454741	0.729641	0.37823	0.549032	58.5389	-0.665077	0.630655	0.199282	0.299862
AQP3	24.3999	41.6428	94.8236	40.9544	38.3994	1.25205	51.4612	20.7763	0	34.8566	0.280403	1.21453	0.85845	0.920048	34.8566	0.0682665	1.04846	0.965388	0.981723
AQP4	6.86246	10.2143	0	0.87137	21.5411	23.789	2.57306	7.79111	4.30406	8.66072	-1.44045	0.368453	0.291026	0.456759	8.66072	0.487071	1.4016	0.711957	0.79361
AQP4-AS1	1.52499	1.57143	7.58589	2.61411	12.1754	0	3.43075	0.865679	0	3.30759	-0.0160515	0.988936	0.993472	0.999306	3.30759	0.92926	1.9043	0.631037	0.726607
AQP5	12.9624	9.42857	22.7577	10.4564	12.1754	7.51231	29.1614	15.5822	31.5631	16.8444	-0.230249	0.852488	0.776419	0.865583	16.8444	-0.730297	0.60278	0.373267	0.488958
AQR	76.2496	135.143	84.7091	136.805	153.598	120.197	115.788	146.3	71.7343	115.614	0.245172	1.18523	0.473596	0.633136	115.614	0.650284	1.56948	0.0561243	0.10725
AR	134.962	292.286	60.6871	203.029	189.187	20.0328	205.845	299.525	98.9934	167.172	1.6039	3.03964	0.000142703	0.000786182	167.172	2.12708	4.36833	4.26704e-07	2.13937e-06
ARAF	588.647	584.571	432.395	670.955	705.238	482.04	660.419	522.87	538.007	576.127	0.403171	1.32241	0.0213081	0.062229	576.127	0.319934	1.24827	0.0680867	0.125709
ARAP1	1313.02	2330.43	446.303	1513.57	1934.02	734.955	1385.17	2734.68	608.307	1444.49	1.23472	2.35336	1.58232e-11	2.519e-10	1444.49	1.96769	3.91141	4.981e-27	1.09071e-25
ARAP2	1.52499	56.5714	5.05726	11.3278	12.1754	17.5287	6.00381	13.8509	1.43469	13.9417	-0.366451	0.775688	0.742912	0.843146	13.9417	1.77461	3.42147	0.102011	0.175477
ARAP3	635.922	1254	343.893	595.145	784.847	361.843	579.797	1072.58	515.052	682.564	0.570703	1.48525	0.00623506	0.0223049	682.564	1.35199	2.55264	7.62456e-11	5.48387e-10
ARC	734.284	414.071	386.88	587.303	604.089	433.21	622.681	594.722	274.025	516.807	0.828129	1.77538	0.000151967	0.000832866	516.807	0.557508	1.47172	0.0109576	0.0263332
ARCN1	504.01	964.857	657.443	533.278	820.437	697.393	415.121	989.472	740.298	702.479	-0.528086	0.693474	0.00104149	0.00469499	702.479	0.40603	1.32503	0.0108344	0.026079
AREL1	235.611	390.5	56.8941	396.473	227.587	125.205	299.333	468.333	143.469	260.378	1.51848	2.8649	1.43672e-05	9.89399e-05	260.378	1.74158	3.34401	6.36831e-07	3.14307e-06
ARF1	3811.72	2826.21	4892.9	3549.09	3896.14	3932.7	3151.14	3119.91	3644.1	3647.1	-0.246471	0.842956	0.101582	0.214608	3647.1	-0.341727	0.789096	0.0232626	0.0508309
ARF3	1400.7	1896.71	1628.44	1260	2052.03	1714.06	1337.13	1729.63	1691.5	1634.47	-0.332248	0.794298	0.00495309	0.0183952	1634.47	0.173656	1.12791	0.140247	0.227027
ARF4	654.984	307.214	893.87	521.079	295.957	1360.98	470.013	397.347	845.03	638.497	-0.913169	0.531017	2.71064e-05	0.00017682	638.497	-1.63188	0.322668	9.98372e-14	9.21855e-13
ARF5	4956.22	2813.64	5141.97	4504.98	3293.92	5512.79	4357.91	2904.35	5217.95	4300.42	-0.199819	0.87066	0.0614843	0.14603	4300.42	-0.816903	0.567659	2.53166e-14	2.42618e-13
ARF6	376.673	346.5	335.043	280.581	297.83	366.851	378.24	365.317	288.372	337.267	0.0639166	1.0453	0.760311	0.855103	337.267	0.0274215	1.01919	0.895996	0.932686
ARFGAP1	1083.51	1783.57	735.831	1146.72	1576.25	780.029	1189.61	1634.4	733.125	1184.78	0.604229	1.52017	1.08031e-06	8.98618e-06	1184.78	1.15102	2.2207	1.02182e-20	1.55447e-19
ARFGAP2	670.996	1133.79	413.431	678.797	922.523	821.346	661.277	1092.49	624.089	779.859	0.113472	1.08183	0.590807	0.729258	779.859	0.760531	1.69411	0.000299896	0.0010028
ARFGAP3	162.412	228.643	112.524	115.892	123.627	201.58	162.961	200.838	205.16	168.182	-0.233276	0.850701	0.482367	0.640896	168.182	0.0935362	1.06698	0.777527	0.845272
ARFGEF1	456.735	678.857	328.722	575.975	783.91	404.413	580.654	794.694	315.631	546.621	0.619754	1.53661	0.000632132	0.00301754	546.621	1.10468	2.15051	9.52578e-10	6.22373e-09
ARFGEF2	222.649	383.428	312.286	391.245	409.282	219.109	377.382	541.05	152.077	334.279	0.533716	1.44765	0.0674159	0.156802	334.279	0.962577	1.94879	0.000945642	0.00287132
ARFGEF3	458.26	959.357	255.391	535.021	830.739	197.824	604.67	896.844	294.111	559.135	1.09816	2.14082	1.1891e-08	1.33754e-07	559.135	1.84863	3.60158	4.8471e-22	7.87653e-21
ARFIP1	115.899	131.214	247.806	181.245	84.2914	78.8793	168.964	124.658	126.252	139.912	0.0400191	1.02813	0.919804	0.955198	139.912	-0.412549	0.751295	0.301699	0.414082
ARFIP2	1522.7	1040.29	1675.22	1493.53	1642.75	1765.39	1357.72	1234.46	1484.9	1468.55	-0.171525	0.887904	0.299337	0.466309	1468.55	-0.331245	0.79485	0.0452882	0.0897414
ARFRP1	1398.42	1174.64	1192.25	1276.56	1563.14	1136.86	1268.52	1053.53	1229.53	1254.83	0.148437	1.10837	0.343296	0.513508	1254.83	0.0910367	1.06514	0.561381	0.666736
ARG2	513.922	520.143	992.487	482.739	680.888	1233.27	430.559	469.198	1354.34	741.95	-1.32612	0.39884	7.49464e-13	1.39821e-11	741.95	-1.10031	0.466415	2.50657e-09	1.57511e-08
ARGFXP2	0	0	11.3788	0	0	0	0	0	0	1.26431	-6.96009	0.00803162	0.129287	0.257245	1.26431	-6.90667	0.00833459	0.132264	0.216938
ARGLU1	2847.16	2933.86	4206.37	2852.86	2574.64	3788.71	3612.58	3143.28	3879.39	3315.43	-0.350722	0.784191	0.00701439	0.0246741	3315.43	-0.456702	0.72865	0.000450463	0.00145452
ARHGAP1	611.522	832.857	548.712	587.303	888.806	368.103	537.77	1121.05	387.365	653.722	0.412626	1.33111	0.0336329	0.0902567	653.722	1.12337	2.17855	6.17872e-09	3.74388e-08
ARHGAP10	61.7622	63.6428	42.9867	79.2946	136.739	8.76437	72.9034	123.792	25.8244	68.4122	1.46382	2.75837	0.00534823	0.0196126	68.4122	2.06247	4.17701	8.06304e-05	0.000296173
ARHGAP11A	227.986	248.286	318.607	237.884	231.333	202.832	277.033	251.913	248.201	249.342	-0.0515046	0.964929	0.825127	0.897554	249.342	-0.0731404	0.950567	0.753969	0.827043
ARHGAP11B	8.38745	11	24.022	9.58507	4.68286	48.83	8.57687	5.19408	31.5631	16.8713	-1.97709	0.254002	0.00882279	0.0298907	16.8713	-2.31285	0.201262	0.0026061	0.00723989
ARHGAP12	269.161	181.5	338.836	327.635	220.094	229.126	333.64	191.315	137.73	247.671	0.396281	1.31611	0.176995	0.320878	247.671	-0.254042	0.838544	0.389976	0.505371
ARHGAP15	3.81248	13.3571	10.1145	0	4.68286	0	3.43075	0	0	3.93308	-0.484102	0.714942	0.826146	0.898305	3.93308	0.83122	1.77919	0.701987	0.785318
ARHGAP17	468.935	475.357	289.528	545.477	629.376	251.663	428.844	444.094	286.937	424.468	0.801687	1.74314	7.43758e-05	0.000438234	424.468	0.902959	1.8699	8.02993e-06	3.43975e-05
ARHGAP18	41.1748	52.6428	30.3435	60.1245	57.1309	78.8793	75.4765	33.7615	126.252	61.754	-0.411674	0.751751	0.431305	0.597239	61.754	-0.711257	0.610788	0.176076	0.271783
ARHGAP19	204.349	336.286	60.6871	170.788	269.733	63.8547	142.376	512.482	87.5159	205.341	1.29153	2.44788	3.84552e-05	0.000242856	205.341	2.4029	5.28867	1.09929e-14	1.0851e-13
ARHGAP19-SLIT1	3.04998	3.14286	0	3.48548	0	7.51231	0.857687	3.46272	4.30406	2.86834	-0.675052	0.62631	0.724074	0.828975	2.86834	-0.830405	0.562372	0.665665	0.755581
ARHGAP20	4.57498	0	1.26431	0.87137	0	5.00821	2.57306	0	0	1.58799	0.348411	1.27316	0.888365	0.938355	1.58799	-6.05474	0.0150432	0.0916279	0.160728
ARHGAP21	100.649	113.929	77.1232	115.892	105.833	26.2931	96.061	201.703	91.8199	103.256	0.682839	1.6053	0.12182	0.245888	103.256	1.11414	2.16466	0.0113188	0.0271139
ARHGAP22	614.572	338.643	413.431	420	370.882	330.542	861.976	381.765	364.41	455.136	0.774924	1.7111	0.00127242	0.00561444	455.136	-0.0226733	0.984407	0.925361	0.954079
ARHGAP23	414.798	622.286	152.982	499.295	563.816	176.539	511.182	623.289	193.683	417.541	1.447	2.7264	2.25224e-14	4.9122e-13	417.541	1.79208	3.46314	2.4129e-21	3.77907e-20
ARHGAP25	19.0624	1.57143	0	12.1992	34.6531	0	4.28844	0	0	7.97495	7.93821	245.268	0.00944919	0.0316057	7.97495	7.95949	248.912	0.00926408	0.0227226
ARHGAP26	197.486	215.286	41.7224	134.191	127.374	91.3998	177.541	224.211	91.8199	144.559	1.18153	2.26817	0.00120281	0.00533736	144.559	1.33665	2.52564	0.000245887	0.000834423
ARHGAP27	73.9621	88	18.9647	67.9668	64.6234	18.7808	57.4651	98.6875	24.3897	56.9822	1.68703	3.21993	0.000159726	0.00087121	56.9822	2.02123	4.05931	5.60546e-06	2.44579e-05
ARHGAP28	104.462	150.857	74.5945	102.822	98.34	86.3916	110.642	116.867	130.556	108.392	0.128389	1.09307	0.704059	0.81437	108.392	0.333487	1.26006	0.322676	0.437137
ARHGAP29	31.2623	27.5	70.8016	36.5975	27.1606	76.3752	34.3075	18.1793	53.0834	41.6964	-0.973435	0.509292	0.0366169	0.0968266	41.6964	-1.46048	0.363372	0.00205948	0.00584537
ARHGAP30	3.81248	5.5	0	4.35685	0.936572	6.26026	6.00381	25.9704	0	5.87115	1.1583	2.23194	0.487454	0.64515	5.87115	2.3531	5.1092	0.153347	0.243439
ARHGAP31	19.0624	58.1428	8.8502	20.9129	42.1457	11.2685	13.723	7.79111	0	20.2107	1.39976	2.63857	0.146353	0.281265	20.2107	2.4096	5.31326	0.0116793	0.0278837
ARHGAP31-AS1	6.09997	0	11.3788	1.74274	0	2.5041	8.57687	0	5.73875	4.00458	-0.25655	0.837088	0.86822	0.926233	4.00458	-7.69138	0.00483797	0.0113236	0.0271217
ARHGAP32	173.849	286	190.911	159.461	207.919	41.3177	175.826	236.33	173.597	182.801	0.328925	1.25608	0.418286	0.584924	182.801	0.849605	1.80201	0.036028	0.0737805
ARHGAP33	243.236	147.714	121.374	206.515	166.71	184.052	241.868	244.122	139.165	188.306	0.637039	1.55513	0.0247133	0.0703004	188.306	0.328061	1.25532	0.249546	0.357752
ARHGAP35	1275.66	2798.71	744.681	1543.2	2255.26	527.114	1659.63	2945.91	684.345	1603.83	1.19514	2.28967	9.08989e-13	1.67582e-11	1603.83	2.03249	4.0911	3.78834e-34	1.18665e-32
ARHGAP36	6.86246	2.35714	0	1.74274	12.1754	2.5041	2.57306	0	37.3018	7.27964	-1.82086	0.283053	0.274662	0.439125	7.27964	-1.45504	0.364745	0.380132	0.495896
ARHGAP39	156.312	208.214	60.6871	132.448	162.963	130.213	153.526	139.374	129.122	141.429	0.468843	1.384	0.164328	0.304733	141.429	0.676384	1.59813	0.0444587	0.0883746
ARHGAP4	518.497	808.5	275.621	608.216	892.553	454.495	569.504	508.154	645.609	586.794	0.303343	1.234	0.262953	0.426297	586.794	0.684606	1.60726	0.0114067	0.0272927
ARHGAP42	72.4371	54.2143	29.0792	33.112	111.452	37.5616	67.7573	64.926	55.9528	58.4991	0.504835	1.41896	0.313834	0.482697	58.4991	0.913346	1.88341	0.0672276	0.124374
ARHGAP44	187.574	256.143	140.339	152.49	184.505	85.1396	176.684	256.241	80.3424	168.829	0.754932	1.68755	0.011875	0.0381787	168.829	1.18673	2.27636	7.13288e-05	0.000264368
ARHGAP5	112.087	192.5	249.07	171.66	175.139	111.433	186.976	193.912	100.428	165.912	0.0275278	1.01926	0.938769	0.966873	165.912	0.283226	1.21691	0.428465	0.54276
ARHGAP5-AS1	7.62496	0.785714	20.229	12.1992	6.556	1.25205	11.1499	18.1793	0	8.66401	0.519928	1.43388	0.712482	0.820386	8.66401	0.239185	1.18033	0.865863	0.909964
ARHGAP6	2.28749	25.9286	0	0	3.74629	0	4.28844	0	1.43469	4.18727	2.26452	4.80495	0.354494	0.525384	4.18727	4.44027	21.7097	0.0647489	0.12033
ARHGAP8	11.4374	2.35714	15.1718	13.0705	9.36572	3.75616	13.723	10.3882	5.73875	9.44541	0.62843	1.54588	0.539518	0.687994	9.44541	-0.167392	0.890451	0.872352	0.914738
ARHGAP9	28.2123	37.7143	39.1937	42.6971	7.49257	0	10.2922	55.4035	2.86937	24.875	0.94425	1.92419	0.390951	0.560728	24.875	1.25464	2.38608	0.25365	0.361996
ARHGDIA	2167.01	2201.57	2058.3	2174.07	2820.95	2269.97	1946.95	2581.46	1935.39	2239.52	0.00539728	1.00375	0.966644	0.983206	2239.52	0.279194	1.21352	0.0303365	0.0638041
ARHGDIB	2.28749	0	0	3.48548	0	26.2931	0	0	0	3.5629	-2.18952	0.219224	0.364817	0.535662	3.5629	-8.11568	0.00360526	0.0215809	0.047599
ARHGDIG	11.4374	14.9286	20.229	20.9129	6.556	33.8054	13.723	10.3882	45.91	19.7656	-1.11708	0.461025	0.113522	0.233796	19.7656	-1.63936	0.320999	0.0225702	0.049489
ARHGEF1	576.447	767.643	364.122	477.511	595.66	451.991	564.358	479.586	245.331	502.517	0.606868	1.52295	0.0112093	0.0364302	502.517	0.794597	1.73459	0.000889406	0.00271205
ARHGEF10	327.111	618.357	235.162	317.179	563.816	350.575	375.667	499.497	137.73	380.566	0.492619	1.407	0.0713702	0.163602	380.566	1.21421	2.32014	8.07742e-06	3.4583e-05
ARHGEF10L	740.384	782.571	233.898	630.872	813.881	316.769	881.703	940.994	173.597	612.741	1.63445	3.10468	6.45926e-14	1.348e-12	612.741	1.80593	3.49654	1.12931e-16	1.29508e-15
ARHGEF11	898.983	927.928	238.955	994.233	957.176	311.761	1167.31	1057.86	266.852	757.896	1.90368	3.74166	2.60025e-29	2.01703e-27	757.896	1.84738	3.59846	1.168e-27	2.66773e-26
ARHGEF12	205.874	365.357	135.282	198.672	307.195	199.076	239.295	277.883	110.471	226.567	0.530475	1.4444	0.0467587	0.117666	226.567	1.09295	2.1331	3.78814e-05	0.000146648
ARHGEF15	17.5374	31.4286	30.3435	19.1701	25.2874	1.25205	25.7306	29.4331	10.0428	21.1362	0.581586	1.49649	0.490677	0.648224	21.1362	1.04722	2.06655	0.212369	0.315265
ARHGEF16	613.809	762.928	443.774	582.075	907.538	438.218	445.14	668.305	197.987	562.197	0.60171	1.51751	0.021923	0.0637079	562.197	1.1125	2.1622	2.17704e-05	8.76199e-05
ARHGEF17	105.224	146.143	6.32157	84.5229	109.579	20.0328	114.93	90.0307	40.1712	79.6617	2.21	4.62677	1.12029e-05	7.86981e-05	79.6617	2.39296	5.25233	1.92903e-06	8.93603e-06
ARHGEF18	687.009	1214.71	279.413	735.436	1102.34	330.542	668.138	1296.79	361.541	741.77	1.10703	2.15401	2.11412e-12	3.76263e-11	741.77	1.89691	3.72415	8.14481e-34	2.53197e-32
ARHGEF19	1079.69	1273.64	661.236	1012.53	1122.01	494.561	1106.42	1432.7	449.057	959.095	0.993971	1.99166	4.92972e-09	5.86608e-08	959.095	1.25335	2.38395	1.52302e-13	1.38223e-12
ARHGEF2	286.698	377.143	135.282	307.593	334.356	211.597	331.925	527.199	150.642	295.826	0.895222	1.8599	0.000391366	0.00195446	295.826	1.31504	2.4881	1.73384e-07	9.04885e-07
ARHGEF25	6.86246	2.35714	0	5.22822	1.87314	2.5041	2.57306	3.46272	0	2.76232	2.52074	5.73876	0.199451	0.350067	2.76232	1.58937	3.00918	0.425335	0.539793
ARHGEF26	160.124	174.429	120.11	131.577	160.154	135.222	139.803	210.36	142.034	152.646	0.120558	1.08716	0.649087	0.772823	152.646	0.456746	1.37244	0.0831464	0.148431
ARHGEF3	14.4874	16.5	7.58589	19.1701	0.936572	13.7726	13.723	10.3882	2.86937	11.0481	0.959195	1.94422	0.366686	0.537428	11.0481	0.199812	1.14855	0.852615	0.900704
ARHGEF33	5.33747	7.85714	6.32157	7.84233	0.936572	2.5041	8.57687	0.865679	28.6937	7.6595	-0.779966	0.58238	0.537916	0.686789	7.6595	-1.93128	0.262197	0.13938	0.226157
ARHGEF34P	3.04998	3.14286	2.52863	3.48548	1.87314	5.00821	6.8615	0	7.17343	3.68036	-0.13225	0.912407	0.930841	0.962236	3.68036	-1.53848	0.344247	0.33516	0.450413
ARHGEF35	19.0624	13.3571	8.8502	20.0415	2.80971	51.3341	10.2922	11.2538	24.3897	17.9323	-0.77622	0.583895	0.363494	0.534591	17.9323	-1.61818	0.325745	0.0633806	0.118449
ARHGEF37	6.09997	21.2143	0	0	0.936572	0	0	1.73136	0	3.33135	5.40643	42.4129	0.118096	0.240384	3.33135	7.36635	165.003	0.0317216	0.0662427
ARHGEF39	439.198	278.929	319.872	417.386	305.322	398.153	376.525	176.599	539.442	361.269	-0.0268282	0.981576	0.915073	0.953199	361.269	-0.723867	0.605472	0.00429221	0.0113921
ARHGEF4	532.985	747.214	204.819	577.718	739.892	194.068	566.074	1051.8	185.075	533.294	1.52088	2.86966	3.12174e-15	7.46177e-14	533.294	2.11956	4.34561	2.49685e-28	5.90801e-27
ARHGEF40	969.895	1349.07	500.668	982.905	1333.68	338.054	882.56	1459.54	411.755	914.236	1.18113	2.26754	2.47299e-13	4.84724e-12	914.236	1.72798	3.31263	6.18611e-27	1.34209e-25
ARHGEF5	125.812	227.857	72.0659	141.162	174.202	122.701	121.792	204.3	83.2118	141.456	0.482092	1.39677	0.109292	0.226991	141.456	1.12441	2.18012	0.000165873	0.000578346
ARHGEF6	19.8249	20.4286	22.7577	14.8133	8.42914	0	12.0076	56.2692	1.43469	17.3294	0.940526	1.91923	0.407043	0.574923	17.3294	1.80798	3.50153	0.108764	0.184635
ARHGEF7	229.511	339.428	135.282	325.021	327.8	162.767	289.041	330.69	210.899	261.16	0.730819	1.65958	0.00236671	0.00972041	261.16	0.974186	1.96453	4.88593e-05	0.000185821
ARHGEF7-AS2	4.57498	0	0	0	1.87314	0	1.71537	0	0	0.907055	5.44104	43.4427	0.232823	0.391487	0.907055	3.67514	12.774	0.427919	0.542277
ARHGEF9	425.473	469.071	448.832	347.676	605.025	469.52	327.637	648.394	430.406	463.559	-0.29261	0.816424	0.127881	0.255342	463.559	0.35195	1.27628	0.065116	0.120875
ARID1A	1524.23	2093.93	600.549	1721.83	1878.76	600.985	1933.23	2501.81	625.523	1497.87	1.50325	2.8348	3.99294e-24	2.07797e-22	1497.87	1.82557	3.54448	7.0649e-35	2.28705e-33
ARID1B	874.583	910.643	338.836	1054.36	885.997	304.249	1175.03	1108.94	291.241	771.541	1.73105	3.3197	1.02202e-23	5.12414e-22	771.541	1.63614	3.10834	2.55828e-21	3.99914e-20
ARID2	468.935	641.143	177.004	621.287	531.973	267.939	511.182	662.245	388.8	474.501	0.94391	1.92373	0.000158249	0.000864587	474.501	1.14116	2.20558	4.85587e-06	2.13287e-05
ARID3A	1592.85	2161.5	498.14	2014.61	1712.99	458.251	2045.58	2419.57	711.604	1512.79	1.76239	3.39259	4.90822e-21	1.98807e-19	1512.79	1.91766	3.7781	1.26836e-24	2.4282e-23
ARID3B	750.296	1092.14	313.55	799.917	887.87	383.128	737.611	1322.76	536.573	758.205	0.893385	1.85753	1.66907e-05	0.000113327	758.205	1.42332	2.68203	6.16606e-12	4.88914e-11
ARID3C	0.762496	0	6.32157	0	1.87314	0	2.57306	0	10.0428	2.39701	-2.29267	0.204097	0.339988	0.510666	2.39701	-3.1581	0.112026	0.205963	0.307906
ARID4A	204.349	305.643	384.352	251.826	337.166	360.591	265.025	420.72	278.329	312	-0.506757	0.703803	0.0247275	0.0703171	312	0.0541605	1.03825	0.809016	0.868936
ARID4B	773.933	967.214	863.527	904.482	946.874	1150.64	974.333	1570.34	801.99	994.815	-0.0868849	0.941554	0.680005	0.796833	994.815	0.306755	1.23692	0.144713	0.23254
ARID5A	322.536	201.929	251.599	341.577	454.237	226.621	359.371	257.107	187.944	289.213	0.618467	1.53524	0.0301836	0.0828109	289.213	0.452521	1.36843	0.113345	0.191038
ARID5B	9.91245	3.14286	17.7004	9.58507	31.8434	32.5534	18.8691	57.1348	5.73875	20.72	-0.551387	0.682364	0.562161	0.707433	20.72	0.711431	1.63743	0.448051	0.562071
ARIH1	355.323	586.143	177.004	287.552	465.476	438.218	334.498	460.541	426.102	392.318	-0.0903472	0.939297	0.75126	0.849209	392.318	0.53933	1.4533	0.057562	0.10951
ARIH2	1643.18	1765.5	1309.83	1659.96	1503.2	1034.2	1627.03	1459.54	1037.28	1448.86	0.543682	1.45769	9.46948e-05	0.000544115	1448.86	0.483637	1.39826	0.000520346	0.0016606
ARIH2OS	34.3123	32.2143	26.5506	18.2988	8.42914	13.7726	27.446	5.19408	123.383	32.1779	-1.02694	0.490749	0.219641	0.375394	32.1779	-1.82547	0.282149	0.031135	0.0651916
ARL1	403.36	168.143	510.783	279.71	147.042	401.909	301.906	220.748	464.838	322.049	-0.482921	0.715527	0.0372422	0.0982747	322.049	-1.36136	0.389216	7.16125e-09	4.3012e-08
ARL10	51.0872	29.0714	26.5506	16.556	39.336	21.2849	48.0305	47.6124	40.1712	35.5222	0.400386	1.31986	0.502242	0.657331	35.5222	0.401648	1.32102	0.501232	0.612344
ARL11	44.9873	29.0714	67.0087	44.4399	34.6531	80.1313	42.0267	4.3284	111.906	50.9503	-0.977364	0.507907	0.0925719	0.200731	50.9503	-1.92843	0.262715	0.00113194	0.00339253
ARL13B	102.174	108.429	249.07	149.876	229.46	121.449	177.541	112.538	183.64	159.353	-0.368176	0.774762	0.329361	0.499662	159.353	-0.3008	0.811802	0.425448	0.539895
ARL14EP	289.748	184.643	637.214	338.091	184.505	828.859	355.94	212.091	677.172	412.029	-1.12434	0.458712	2.03161e-09	2.53489e-08	412.029	-1.88293	0.271133	6.47606e-23	1.10706e-21
ARL15	32.7873	15.7143	46.7796	53.1535	29.9703	7.51231	56.6074	25.9704	81.7771	38.9191	0.0706648	1.0502	0.918213	0.954414	38.9191	-0.923296	0.527303	0.185607	0.283882
ARL16	2793.02	1425.29	3880.18	2664.65	1922.78	4105.48	2527.6	1440.49	3723.01	2720.28	-0.552179	0.681989	3.39076e-05	0.000216669	2720.28	-1.29053	0.408801	5.1267e-22	8.28179e-21
ARL17A	2.28749	3.14286	6.32157	3.48548	1.87314	10.0164	0.857687	0	4.30406	3.58763	-1.64168	0.320483	0.299494	0.466444	3.58763	-2.03489	0.244027	0.206816	0.308965
ARL2	7547.18	4742.57	10240.9	6510	5665.32	10291.9	6761.15	5267.66	11461.7	7609.82	-0.619828	0.650748	1.58186e-08	1.75278e-07	7609.82	-1.02938	0.48992	6.91575e-21	1.0619e-19
ARL2BP	125.812	130.429	126.431	83.6515	75.8623	7.51231	102.922	171.405	77.4731	100.166	0.564344	1.47871	0.351752	0.522618	100.166	0.838296	1.78794	0.166144	0.259554
ARL3	1471.62	826.571	3708.23	1270.46	782.037	3662.25	1153.59	728.036	3427.47	1892.25	-1.4705	0.360857	1.71099e-31	1.546e-29	1892.25	-2.20811	0.216418	1.81876e-67	2.09157e-65
ARL4A	280.598	132	456.417	237.884	216.348	634.791	258.164	162.748	615.48	332.714	-1.13516	0.455284	9.42686e-07	7.92155e-06	332.714	-1.74182	0.298991	1.04914e-13	9.66023e-13
ARL4C	276.786	1170.71	199.762	261.411	897.236	292.98	281.321	1282.07	317.066	553.261	0.0188373	1.01314	0.928935	0.960775	553.261	2.05032	4.14198	4.93203e-23	8.47516e-22
ARL4D	191.386	151.643	128.96	209.129	99.2766	329.29	186.976	81.3739	126.252	167.143	0.00568557	1.00395	0.98806	0.996252	167.143	-0.814841	0.568471	0.0334415	0.0694376
ARL5A	542.135	436.857	958.35	541.121	524.48	850.144	493.17	560.96	1152.05	673.252	-0.908385	0.532781	9.56395e-08	9.32301e-07	673.252	-0.959514	0.51423	1.83354e-08	1.05724e-07
ARL5B	28.9748	18.8571	36.6651	45.3112	24.3509	32.5534	16.2961	22.5077	10.0428	26.1732	0.186393	1.13792	0.783542	0.869927	26.1732	-0.277325	0.82512	0.685398	0.771324
ARL6	19.0624	23.5714	10.1145	15.6847	28.0971	16.2767	19.7268	10.3882	64.5609	23.0536	-0.732077	0.602037	0.35231	0.522968	23.0536	-0.545175	0.685308	0.487548	0.599948
ARL6IP1	3075.91	1600.5	2456.56	3591.79	2001.45	2264.96	3927.35	2005.78	2487.75	2601.34	0.555433	1.46961	3.52077e-05	0.000224068	2601.34	-0.36266	0.777729	0.00715802	0.0180626
ARL6IP4	10475.2	7322.07	12483.8	9152.87	7174.14	13090.2	9796.51	6882.15	13072.9	9938.87	-0.393259	0.761407	1.91479e-05	0.000128421	9938.87	-0.854169	0.553184	1.84887e-20	2.77415e-19
ARL6IP5	889.833	433.714	1354.08	941.951	570.372	1387.27	864.549	629.349	1523.64	954.973	-0.661355	0.632284	2.53226e-05	0.00016604	954.973	-1.38534	0.382799	2.29447e-18	2.96874e-17
ARL6IP6	307.286	100.571	404.581	243.112	96.4669	262.931	247.014	104.747	288.372	228.342	-0.261309	0.834331	0.283836	0.448658	228.342	-1.66351	0.31567	3.69362e-11	2.72506e-10
ARL8A	408.698	233.357	281.942	363.361	240.699	250.41	467.44	347.137	295.545	320.954	0.582864	1.49782	0.00923349	0.0310204	320.954	-0.0112853	0.992208	0.960114	0.978318
ARL8B	132.674	133.571	279.413	166.432	69.3063	73.8711	109.784	153.225	175.032	143.701	-0.369713	0.773937	0.392993	0.562616	143.701	-0.567807	0.674642	0.190513	0.289689
ARL9	19.8249	3.92857	18.9647	20.9129	0	23.789	30.0191	19.9106	45.91	20.3622	-0.323452	0.799155	0.729827	0.832894	20.3622	-1.89004	0.269799	0.0497472	0.0968501
ARMC1	171.562	185.429	217.462	142.033	252.874	409.421	176.684	238.928	278.329	230.302	-0.884821	0.541555	0.00132486	0.00581151	230.302	-0.420028	0.74741	0.125305	0.207392
ARMC10	166.987	218.429	567.677	135.934	162.963	419.438	146.665	216.42	440.449	274.996	-1.6662	0.315082	3.61476e-13	6.94447e-12	274.996	-1.2548	0.419052	3.41385e-08	1.91411e-07
ARMC12	28.9748	0.785714	5.05726	14.8133	2.80971	40.0657	15.4384	6.05976	28.6937	15.8554	-0.315134	0.803776	0.732484	0.835231	15.8554	-2.94358	0.129985	0.00336459	0.00912597
ARMC2	35.0748	26.7143	44.251	24.3984	43.0823	81.3834	40.3113	5.19408	77.4731	41.987	-1.02439	0.491618	0.10899	0.226572	41.987	-1.43977	0.368626	0.0254507	0.0549308
ARMC4	46.5122	58.1428	29.0792	36.5975	53.3846	70.1149	33.4498	70.12	61.6915	51.0103	-0.462271	0.725843	0.329922	0.500208	51.0103	0.176554	1.13018	0.706737	0.789397
ARMC5	210.449	327.643	116.317	169.917	278.162	162.767	162.961	308.182	113.34	205.526	0.468493	1.38366	0.0655436	0.153383	205.526	1.21832	2.32675	1.33483e-06	6.32419e-06
ARMC6	1665.29	2348.5	1461.55	1770.62	1899.37	1671.49	1403.18	1690.67	1506.42	1713.01	0.060711	1.04298	0.688183	0.802408	1713.01	0.356317	1.28015	0.0183628	0.0415135
ARMC7	211.974	291.5	146.66	236.141	274.415	155.254	167.249	340.212	119.079	215.832	0.545754	1.45978	0.0280079	0.0777366	215.832	1.10411	2.14966	7.63469e-06	3.27813e-05
ARMC8	150.212	167.357	170.682	226.556	179.822	43.8218	225.572	270.958	183.64	179.847	0.598863	1.51452	0.150558	0.287197	179.847	0.636601	1.55466	0.126511	0.209153
ARMC9	375.148	602.643	323.664	350.291	521.67	336.802	385.959	601.647	291.241	421.007	0.222929	1.1671	0.19837	0.348674	421.007	0.858265	1.81286	5.88788e-07	2.91294e-06
ARMCX1	112.849	138.286	269.299	100.208	205.109	43.8218	120.934	159.285	163.554	145.927	-0.512845	0.700839	0.263529	0.426843	145.927	0.0763352	1.05434	0.867322	0.911015
ARMCX2	430.81	662.357	496.875	401.701	545.085	370.607	306.194	438.899	466.273	457.645	-0.227325	0.854217	0.297361	0.464001	457.645	0.304541	1.23503	0.160799	0.252684
ARMCX3	150.974	192.5	98.6165	231.784	92.7206	50.0821	157.814	99.5531	202.291	141.815	0.626342	1.54365	0.162085	0.301731	141.815	0.13779	1.10022	0.759259	0.831072
ARMCX4	89.9745	211.357	112.524	148.133	206.982	195.32	123.507	264.898	43.0406	155.082	0.0388963	1.02733	0.925994	0.959001	155.082	0.957722	1.94224	0.0213772	0.0472066
ARMCX5	44.9873	42.4286	74.5945	47.054	16.8583	26.2931	138.088	21.642	35.8672	49.7569	0.748879	1.68049	0.223243	0.37967	49.7569	-0.753496	0.593164	0.229179	0.334622
ARMCX5-GPRASP2	9.91245	0.785714	16.4361	11.3278	10.3023	26.2931	13.723	7.79111	18.6509	12.8025	-0.813617	0.568954	0.37229	0.543384	12.8025	-1.71508	0.304587	0.067205	0.124346
ARMCX6	49.5622	20.4286	116.317	46.1826	33.7166	78.8793	46.3151	20.7763	50.214	51.3768	-0.790803	0.578022	0.0920335	0.199801	51.3768	-1.71845	0.303875	0.000361913	0.00119034
ARMT1	183.762	123.357	160.568	204.772	97.4034	189.06	136.372	83.1052	216.638	155.004	-0.108261	0.927706	0.707476	0.816624	155.004	-0.895463	0.537575	0.00224071	0.00631458
ARNT	102.937	121.786	104.938	77.5519	45.892	77.6272	90.0572	213.823	55.9528	98.9516	0.180511	1.13329	0.707695	0.816763	98.9516	0.6768	1.59859	0.158255	0.249377
ARNT2	121.999	310.357	68.273	95.8507	197.617	91.3998	121.792	185.255	24.3897	135.215	0.877562	1.83727	0.031508	0.0856732	135.215	1.90724	3.75091	2.48384e-06	1.13464e-05
ARNTL	47.2747	36.1428	48.0439	82.7801	32.78	33.8054	56.6074	35.4929	93.2546	51.798	0.0958721	1.06871	0.845833	0.912365	51.798	-0.740428	0.598562	0.139458	0.22624
ARNTL2	75.4871	80.9286	44.251	66.2241	60.8772	31.3013	97.7764	58.8662	30.1284	60.6489	1.17788	2.26244	0.00522059	0.0192107	60.6489	0.924345	1.89782	0.029155	0.0616661
ARPC1A	1996.98	1459.86	2599.43	1883.03	1745.77	2736.99	1678.49	1179.92	2523.61	1978.23	-0.499799	0.707205	0.000720805	0.00338289	1978.23	-0.842144	0.557814	1.30833e-08	7.65673e-08
ARPC1B	6183.08	5408.86	5675.51	5826.85	6705.85	5833.31	5520.08	4885.03	5694.27	5748.09	0.0271897	1.01903	0.826332	0.898332	5748.09	-0.0172936	0.988085	0.88904	0.927799
ARPC2	7117.14	4333.21	9642.92	6737.43	5758.04	10184.2	6582.75	4381.2	9867.77	7178.3	-0.538984	0.688256	9.11045e-06	6.51397e-05	7178.3	-1.03711	0.487302	1.50447e-17	1.82456e-16
ARPC3	2127.36	1030.86	4208.9	1734.9	1379.57	4064.16	1668.2	1266.49	3599.63	2342.23	-1.10203	0.465859	2.26703e-14	4.93793e-13	2342.23	-1.69176	0.309549	1.79855e-31	4.96262e-30
ARPC4	1370.21	1026.93	1227.65	1325.35	1282.17	1111.82	1084.12	1140.97	1510.72	1231.1	-0.0258748	0.982225	0.871802	0.928608	1231.1	-0.158053	0.896234	0.32487	0.439352
ARPC5	881.445	719.714	1513.38	883.569	709.921	1042.96	849.968	649.26	813.467	895.965	-0.366558	0.775631	0.0613801	0.145874	895.965	-0.697525	0.616629	0.000384487	0.00125904
ARPC5L	6886.1	5353.86	6418.92	6577.1	6161.7	7359.56	6122.17	5219.18	7075.87	6352.72	-0.0905096	0.939191	0.405844	0.57373	6352.72	-0.317591	0.802408	0.00356391	0.00962216
ARPIN	31.2623	79.3571	22.7577	35.7262	72.116	27.5452	25.7306	51.0751	20.0856	40.6284	0.394709	1.31468	0.433538	0.599171	40.6284	1.52256	2.873	0.00206439	0.00585629
ARPP19	497.91	486.357	599.285	507.137	380.248	711.166	584.085	374.839	493.532	514.951	-0.184087	0.880206	0.339687	0.51043	514.951	-0.539277	0.688116	0.00537471	0.0139588
ARRB1	45.7498	155.571	29.0792	58.3818	71.1794	91.3998	60.8958	128.121	84.6465	80.5582	-0.313177	0.804868	0.508509	0.662109	80.5582	0.793772	1.7336	0.0898106	0.158164
ARRB2	527.647	472.214	571.47	582.075	531.036	323.029	482.02	431.108	427.537	483.126	0.267738	1.20392	0.213529	0.36816	483.126	0.117319	1.08472	0.586376	0.68888
ARRDC1	539.085	194.071	409.638	612.573	568.499	450.739	511.182	467.467	383.061	459.59	0.418996	1.337	0.151571	0.288527	459.59	-0.0172249	0.988132	0.953106	0.973469
ARRDC1-AS1	1402.23	747.214	1360.4	1199	984.337	1244.54	1356.86	795.559	1015.76	1122.88	0.1281	1.09285	0.423006	0.58957	1122.88	-0.520007	0.697368	0.00121579	0.00362532
ARRDC2	64.8122	88	3.79294	61.8672	51.5114	55.0903	89.1995	115.135	90.3852	68.866	0.536225	1.45017	0.420499	0.586971	68.866	0.775224	1.71146	0.24367	0.351228
ARRDC3	18.2999	18.0714	1.26431	13.9419	8.42914	16.2767	12.8653	64.0603	8.60812	17.9797	0.786711	1.72514	0.418719	0.585282	17.9797	1.79164	3.46208	0.0629107	0.117832
ARRDC3-AS1	5.33747	1.57143	0	6.97096	3.74629	16.2767	2.57306	0	1.43469	4.21229	-0.256555	0.837084	0.883094	0.934838	4.21229	-1.75082	0.297133	0.332751	0.447925
ARRDC4	19.8249	45.5714	18.9647	27.0125	72.116	0	18.0114	20.7763	5.73875	25.3351	1.38832	2.61774	0.118473	0.240859	25.3351	2.48231	5.5879	0.00486392	0.0127755
ARSA	163.937	211.357	208.612	187.344	245.382	202.832	149.238	269.226	152.077	198.889	-0.173125	0.88692	0.486515	0.644546	198.889	0.363045	1.28614	0.141312	0.228458
ARSB	136.487	186.214	112.524	192.573	199.49	112.685	186.118	224.211	107.601	161.989	0.628699	1.54617	0.0182285	0.0548839	161.989	0.873216	1.83174	0.00100619	0.00304112
ARSD	114.374	311.928	107.467	111.535	202.299	246.654	96.9187	282.211	87.5159	173.434	-0.454409	0.729809	0.215798	0.370903	173.434	0.84874	1.80093	0.0193378	0.043367
ARSE	74.7246	38.5	44.251	74.0664	97.4034	38.8136	54.892	63.1946	40.1712	58.4463	0.725099	1.65301	0.115805	0.237074	58.4463	0.688472	1.61158	0.135896	0.221685
ARSF	0	3.92857	0	10.4564	0	0	2.57306	0	0	1.88423	6.48667	89.6775	0.0953165	0.20506	1.88423	4.77213	27.3247	0.224621	0.329165
ARSG	39.6498	29.8571	36.6651	25.2697	3.74629	1.25205	33.4498	13.8509	12.9122	21.8503	0.951873	1.93438	0.314435	0.483441	21.8503	-0.0945035	0.936595	0.92132	0.951225
ARSI	139.537	131.214	30.3435	146.39	162.963	12.5205	114.072	241.525	220.942	133.279	0.602871	1.51874	0.517311	0.669856	133.279	1.02422	2.03387	0.271047	0.380874
ARSJ	44.9873	49.5	37.9294	46.1826	62.7503	71.367	64.3266	44.1497	32.9978	50.4656	0.123884	1.08966	0.79427	0.877867	50.4656	0.131825	1.09568	0.78158	0.848444
ARSK	133.437	76.2143	83.4447	144.647	71.1794	41.3177	156.099	78.7768	116.21	100.147	0.853698	1.80713	0.0241999	0.0691008	100.147	-0.0866469	0.941709	0.821451	0.878105
ART3	0	0	1.26431	10.4564	1.87314	0	0.857687	0	0	1.60573	3.13993	8.81482	0.332834	0.503168	1.60573	0.524109	1.43805	0.876282	0.917942
ART5	471.985	286.786	493.083	416.515	396.17	676.108	483.736	376.571	568.136	463.232	-0.340335	0.789858	0.082384	0.183379	463.232	-0.714759	0.609307	0.000286203	0.000959552
ARTN	119.712	123.357	91.0306	154.232	103.023	116.441	175.826	147.166	81.7771	123.618	0.63407	1.55194	0.0436243	0.111484	123.618	0.367747	1.29034	0.244188	0.351611
ARV1	241.711	110.786	537.334	191.701	91.784	515.846	198.126	53.6721	334.282	252.805	-1.13578	0.455089	7.18618e-05	0.00042479	252.805	-2.43612	0.18478	1.0233e-16	1.17597e-15
ARVCF	1045.38	1298.79	603.078	1205.98	1223.16	642.303	1109.85	1309.77	582.483	1002.31	0.878052	1.83789	1.72023e-11	2.72273e-10	1002.31	1.06748	2.09577	2.60075e-16	2.90356e-15
ASAH1	412.51	207.429	520.897	448.755	184.505	721.182	415.978	201.703	515.052	403.112	-0.461059	0.726453	0.0165698	0.050611	403.112	-1.56556	0.337847	1.7353e-15	1.81996e-14
ASAP1	215.024	306.428	208.612	256.183	265.986	256.671	272.745	280.48	265.417	258.616	0.0259724	1.01817	0.904689	0.947619	258.616	0.224471	1.16835	0.299594	0.411632
ASAP2	155.549	206.643	44.251	104.564	135.803	105.172	177.541	194.778	137.73	140.226	0.611485	1.52783	0.119402	0.242295	140.226	0.907645	1.87598	0.0205526	0.0456514
ASAP3	352.273	505.214	319.872	334.606	467.349	165.271	331.067	580.005	321.37	375.225	0.337544	1.2636	0.168823	0.310513	375.225	0.946522	1.92722	0.000106202	0.000382501
ASB1	736.571	795.928	859.734	600.374	718.35	636.043	656.989	827.59	687.215	724.31	-0.130518	0.913503	0.433037	0.598781	724.31	0.101324	1.07276	0.542033	0.648743
ASB12	13.7249	10.2143	2.52863	6.09959	11.2389	5.00821	12.8653	8.65679	4.30406	8.29341	1.46863	2.76759	0.162927	0.302886	8.29341	1.34751	2.54473	0.20185	0.302812
ASB13	443.773	409.357	255.391	386.017	498.256	161.515	361.086	428.511	140.599	342.723	1.09302	2.1332	5.67262e-06	4.19264e-05	342.723	1.25828	2.39211	1.70207e-07	8.89717e-07
ASB14	1.52499	1.57143	8.8502	7.84233	1.87314	1.25205	2.57306	1.73136	12.9122	4.45897	-0.947121	0.518666	0.503343	0.658242	4.45897	-2.14918	0.225441	0.147753	0.236293
ASB16	1.52499	0	0	2.61411	4.68286	2.5041	0	0.865679	8.60812	2.3111	-1.41693	0.374509	0.540417	0.688564	2.3111	-1.00684	0.497634	0.660841	0.751851
ASB16-AS1	136.487	83.2857	40.4581	96.722	51.5114	246.654	99.4917	76.1798	81.7771	101.396	-0.149822	0.901362	0.77178	0.862574	101.396	-0.806322	0.571838	0.120802	0.201467
ASB2	100.649	43.2143	49.3083	101.95	100.213	91.3998	131.226	71.8514	77.4731	85.254	0.613681	1.53016	0.135367	0.265962	85.254	-0.0222429	0.984701	0.957237	0.976334
ASB3	60.2372	39.2857	44.251	40.9544	44.9554	53.8382	46.3151	83.9709	48.7793	51.3986	0.00764611	1.00531	0.987042	0.99573	51.3986	0.195073	1.14478	0.677904	0.764952
ASB6	556.622	612.857	366.651	528.05	503.876	394.396	458.863	509.019	515.052	493.932	0.276311	1.21109	0.14704	0.282188	493.932	0.351447	1.27584	0.0650702	0.120817
ASB7	25.1624	47.9286	26.5506	12.1992	16.8583	1.25205	25.7306	39.8213	31.5631	25.2296	0.0940766	1.06738	0.911816	0.951448	25.2296	0.824298	1.77067	0.328408	0.443141
ASB8	102.174	163.429	74.5945	89.7511	177.012	117.693	98.6341	69.2544	154.946	116.388	-0.254777	0.838117	0.525724	0.676489	116.388	0.24051	1.18141	0.547212	0.653705
ASB9	1.52499	0.785714	1.26431	6.97096	0	0	18.0114	3.46272	0	3.55779	4.35592	20.4768	0.0561653	0.135989	3.55779	1.72041	3.29531	0.46555	0.578989
ASCC1	86.162	131.214	85.9734	57.5104	136.739	87.6437	54.0343	98.6875	80.3424	90.923	-0.359218	0.779587	0.307621	0.475721	90.923	0.529089	1.44302	0.126901	0.209654
ASCC2	578.734	744.071	393.202	739.793	578.801	538.382	668.996	1017.17	256.809	612.885	0.740153	1.67035	0.00402585	0.0154613	612.885	0.976123	1.96717	0.000147038	0.000517263
ASCC3	499.435	837.571	528.483	535.892	760.496	751.231	574.651	923.68	505.01	657.383	-0.149842	0.901349	0.416954	0.583855	657.383	0.497941	1.4122	0.00669071	0.017006
ASCL2	8.38745	7.85714	20.229	6.97096	7.49257	20.0328	10.2922	0.865679	0	9.12532	-0.656005	0.634633	0.597634	0.734262	9.12532	-1.31694	0.401386	0.295998	0.407747
ASCL5	7.62496	5.5	0	0.87137	3.74629	1.25205	3.43075	0.865679	0	2.5879	3.21676	9.29696	0.164621	0.305139	2.5879	2.9762	7.86912	0.199893	0.300672
ASF1A	421.66	123.357	1120.18	431.328	233.206	1284.61	384.244	245.853	1152.05	599.61	-1.5235	0.347841	4.29111e-12	7.29001e-11	599.61	-2.56454	0.169042	1.7816e-30	4.74852e-29
ASF1B	867.72	681.214	775.025	879.212	595.66	281.712	775.349	717.648	671.433	693.886	0.546064	1.4601	0.040846	0.105898	693.886	0.207483	1.15467	0.437816	0.551884
ASGR1	94.5495	67.5714	108.731	94.1079	78.672	18.7808	90.9149	77.0455	146.338	86.3012	0.032815	1.02301	0.950137	0.973278	86.3012	-0.291899	0.816826	0.579307	0.68326
ASGR2	12.9624	8.64286	27.8149	7.84233	20.6046	7.51231	9.43456	4.3284	1.43469	11.1752	-0.286598	0.819833	0.791921	0.875976	11.1752	-0.141338	0.906678	0.896333	0.932747
ASH1L	997.345	594	414.695	1358.47	531.973	166.523	1826.02	530.661	268.286	743.107	2.29914	4.92164	2.32319e-17	6.7262e-16	743.107	0.963589	1.95015	0.000405546	0.00132011
ASH1L-AS1	95.312	49.5	136.546	63.61	30.9069	132.718	59.1804	25.9704	150.642	82.7095	-0.942629	0.520284	0.0130888	0.0414411	82.7095	-1.97571	0.254245	4.47456e-07	2.23728e-06
ASH2L	308.048	415.643	360.33	265.768	296.893	103.92	234.149	287.406	319.935	288.01	0.0443173	1.0312	0.899356	0.944439	288.01	0.352042	1.27637	0.314377	0.428234
ASIC1	54.8997	117.071	60.6871	53.1535	60.8772	57.5944	66.8996	75.3141	38.7365	65.026	0.152717	1.11166	0.720216	0.826284	65.026	0.689049	1.61222	0.103388	0.177531
ASIC2	26.6874	4.71428	13.9075	13.0705	25.2874	0	10.2922	8.65679	10.0428	12.5177	1.06897	2.09793	0.336785	0.507414	12.5177	0.689078	1.61225	0.537779	0.644825
ASIC3	7.62496	7.85714	0	5.22822	4.68286	0	4.28844	10.3882	7.17343	5.24924	1.29641	2.45618	0.401027	0.569654	5.24924	1.71545	3.28398	0.264207	0.373144
ASIC4	1.52499	0.785714	0	0	8.42914	0	5.14612	0.865679	0	1.86129	5.52222	45.9572	0.119636	0.242548	1.86129	6.11281	69.2053	0.0839408	0.149508
ASL	1139.93	1356.14	1116.39	1009.92	1421.72	1150.64	952.033	1385.95	1397.38	1214.46	-0.23938	0.847109	0.0833641	0.184998	1214.46	0.184945	1.13677	0.17954	0.276199
ASMT	20.5874	16.5	13.9075	14.8133	4.68286	16.2767	17.1537	10.3882	35.8672	16.6863	-0.323212	0.799288	0.679753	0.796647	16.6863	-1.05143	0.482491	0.187609	0.286263
ASMTL	2661.11	2781.43	2801.72	2023.32	2743.22	1805.46	2121.92	1971.15	2537.96	2383.03	-0.0698028	0.952768	0.70172	0.812203	2383.03	0.0692559	1.04918	0.703885	0.786853
ASMTL-AS1	27.4499	65.2143	8.8502	33.9834	44.9554	6.26026	47.1728	53.6721	24.3897	34.6609	1.47519	2.78021	0.0186995	0.0559929	34.6609	2.07065	4.20074	0.000894729	0.0027268
ASNA1	4648.94	3504.28	5753.89	4213.94	4872.05	5396.35	3847.59	3356.24	5151.96	4527.25	-0.359031	0.779688	0.0134083	0.0423468	4527.25	-0.474807	0.719563	0.00108007	0.00324476
ASNS	925.67	1379.71	1202.36	704.067	1170.71	1111.82	785.642	1288.13	999.976	1063.12	-0.456236	0.728885	0.00248196	0.0101355	1063.12	0.211783	1.15812	0.157905	0.248946
ASNSD1	273.736	138.286	500.668	214.357	165.773	368.103	303.621	199.972	560.962	302.831	-0.851648	0.554151	0.000448431	0.00221455	302.831	-1.50423	0.352517	8.90731e-10	5.82892e-09
ASPG	4.57498	2.35714	17.7004	8.7137	7.49257	8.76437	3.43075	0.865679	0	5.98884	-0.670286	0.628382	0.638055	0.765506	5.98884	-1.31976	0.400601	0.361902	0.477597
ASPH	1200.93	859.571	1232.71	1746.22	1632.44	1203.22	2172.52	1304.58	1315.61	1407.53	0.448446	1.36457	0.0457998	0.11582	1407.53	0.0168376	1.01174	0.940303	0.963648
ASPHD1	247.049	242	225.048	284.067	252.874	338.054	223.856	260.57	332.847	267.374	-0.246429	0.84298	0.282421	0.447439	267.374	-0.245523	0.84351	0.284592	0.396049
ASPHD2	235.611	476.143	231.37	256.183	396.17	229.126	369.663	474.392	239.593	323.139	0.298755	1.23008	0.185249	0.33096	323.139	0.944494	1.92451	2.48435e-05	9.91389e-05
ASPM	576.447	1175.43	1182.13	998.59	1252.2	882.697	913.437	1611.03	1226.66	1090.96	-0.403753	0.75589	0.0547654	0.133405	1090.96	0.295384	1.22721	0.158777	0.250032
ASPRV1	19.8249	3.92857	0	10.4564	16.8583	0	15.4384	0	51.6487	13.1284	-0.169825	0.88895	0.914048	0.952894	13.1284	-1.31269	0.40257	0.408703	0.52386
ASPSCR1	1168.14	1380.5	1479.25	1166.76	1667.1	1257.06	982.052	917.62	1233.83	1250.26	-0.2594	0.835436	0.178193	0.322201	1250.26	-0.00214126	0.998517	0.991125	0.998288
ASRGL1	2365.26	2108.07	2489.43	2560.08	2466.93	2829.64	2501.87	2054.26	2447.57	2424.79	-0.064747	0.956113	0.587274	0.72712	2424.79	-0.228886	0.853294	0.0553348	0.105984
ASS1	2882.23	2209.43	2710.69	2595.81	2719.8	2750.76	2348.35	2089.75	2599.65	2545.16	-0.0425629	0.970929	0.746809	0.846167	2545.16	-0.20006	0.870514	0.129524	0.21328
ASTE1	46.5122	51.8571	59.4228	22.6556	20.6046	95.156	43.7421	30.2988	14.3469	42.7329	-0.583773	0.667216	0.372285	0.543384	42.7329	-0.717693	0.608069	0.273888	0.383752
ASTN1	100.649	204.286	21.4933	108.05	162.027	30.0493	159.53	190.449	88.9506	118.387	1.40009	2.63917	0.00177892	0.00753587	118.387	1.99733	3.99262	7.66679e-06	3.29106e-05
ASTN2	288.223	407	268.035	257.054	282.845	115.189	261.595	399.078	149.207	269.803	0.599026	1.51469	0.0430347	0.110252	269.803	1.03185	2.04465	0.000473658	0.00152254
ASUN	289.748	205.857	566.413	302.365	182.631	246.654	203.272	230.271	545.181	308.044	-0.771141	0.585954	0.00914374	0.0307629	308.044	-1.13333	0.455863	0.000136136	0.000481661
ASXL1	267.636	527.214	158.039	399.959	480.461	143.986	397.967	629.349	233.854	359.829	0.993954	1.99164	6.48628e-05	0.000388021	359.829	1.61435	3.06174	7.254e-11	5.22523e-10
ASXL2	218.074	393.643	180.797	341.577	403.662	145.238	357.656	392.153	271.156	300.439	0.621193	1.53815	0.0211684	0.0619091	300.439	0.996882	1.99568	0.000208416	0.000715382
ATAD1	199.774	198.786	341.365	238.755	148.915	235.386	201.557	189.584	143.469	210.843	-0.172455	0.887331	0.570348	0.714021	210.843	-0.423937	0.745388	0.164422	0.257389
ATAD2	263.824	498.143	417.224	304.108	408.345	558.415	293.329	690.812	373.018	423.024	-0.648231	0.638062	0.00556558	0.020303	423.024	0.243514	1.18387	0.29373	0.405499
ATAD2B	77.7746	149.286	145.396	103.693	132.057	51.3341	90.9149	112.538	35.8672	99.8734	0.22377	1.16778	0.624988	0.755064	99.8734	0.756726	1.68965	0.096901	0.168237
ATAD3A	2273.76	2617.21	1945.78	2151.41	3325.77	1553.8	2217.98	2429.1	1672.84	2243.07	0.361001	1.28432	0.0114419	0.0370542	2243.07	0.694452	1.61827	1.11436e-06	5.3288e-06
ATAD3B	2523.1	2783.79	1831.99	2536.56	3858.67	1854.29	2368.93	2602.23	1873.7	2470.36	0.418058	1.33613	0.00429892	0.0163534	2470.36	0.733314	1.66245	5.35714e-07	2.65676e-06
ATAD3C	47.2747	51.8571	46.7796	32.2407	35.5897	16.2767	30.8767	17.3136	38.7365	35.2162	0.119985	1.08672	0.8448	0.911656	35.2162	0.0449661	1.03166	0.941631	0.964565
ATAD5	291.273	368.5	656.179	423.486	384.931	742.467	435.705	378.302	493.532	463.819	-0.719679	0.607233	0.000729382	0.00341632	463.819	-0.742555	0.59768	0.000496767	0.00159091
ATAT1	148.687	82.5	130.224	137.676	65.56	212.849	126.938	110.807	216.638	136.875	-0.436214	0.739072	0.168249	0.309908	136.875	-1.11059	0.463106	0.000538428	0.00171465
ATCAY	1086.56	2103.36	524.69	1436.89	1802.9	580.952	1480.37	2155.54	682.911	1317.13	1.16323	2.23958	8.87056e-13	1.64275e-11	1317.13	1.76211	3.39194	1.90001e-27	4.25691e-26
ATE1	195.199	221.571	264.242	215.228	265.986	176.539	222.999	206.032	223.811	221.29	-0.0694936	0.952972	0.773735	0.864031	221.29	0.0611181	1.04327	0.800154	0.862006
ATE1-AS1	1.52499	4.71428	1.26431	4.35685	0	2.5041	9.43456	0	2.86937	2.96316	1.20745	2.30929	0.530612	0.680861	2.96316	-0.465542	0.724199	0.815229	0.873555
ATF1	175.374	80.1428	270.563	118.506	70.2429	306.753	134.657	146.3	208.03	167.841	-0.873748	0.545727	0.00756976	0.0263126	167.841	-1.40497	0.377625	2.09511e-05	8.45706e-05
ATF2	102.937	191.714	160.568	136.805	171.393	135.222	174.968	196.509	175.032	160.572	-0.183467	0.880584	0.517506	0.670003	160.572	0.250729	1.18981	0.373559	0.489224
ATF3	179.949	121	109.995	123.734	136.739	194.068	163.818	170.539	156.381	150.692	0.0227515	1.0159	0.941209	0.968189	150.692	-0.104945	0.92984	0.734381	0.812985
ATF4	4462.89	2761	5033.23	4248.8	2470.68	5547.84	3849.3	2049.93	4865.02	3920.97	-0.298315	0.813202	0.0201673	0.059553	3920.97	-1.08483	0.471446	3.74161e-17	4.41714e-16
ATF5	65.5746	119.429	75.8589	87.137	55.2577	76.3752	102.922	111.673	159.25	94.8308	-0.282787	0.822001	0.509434	0.662966	94.8308	-0.116154	0.922644	0.786122	0.851913
ATF6	147.924	296.214	139.075	204.772	250.065	313.013	216.137	246.719	302.719	235.182	-0.408051	0.753641	0.181909	0.326704	235.182	0.0724709	1.05152	0.811824	0.871212
ATF6B	105.987	65.2143	93.5593	57.5104	59.004	50.0821	64.3266	91.762	65.9956	72.6046	0.12177	1.08807	0.775227	0.864782	72.6046	0.0429725	1.03023	0.919895	0.95041
ATF7	73.1996	51.0714	227.577	61.8672	76.7989	156.507	86.6264	81.3739	80.3424	99.4848	-1.06895	0.476667	0.00886752	0.0300036	99.4848	-1.15401	0.449375	0.00482187	0.0126772
ATF7IP	590.172	1015.93	571.47	549.834	949.684	529.618	739.327	1071.71	685.78	744.836	0.0736684	1.05239	0.664786	0.785036	744.836	0.766505	1.70114	5.7765e-06	2.51775e-05
ATF7IP2	52.6122	48.7143	73.3302	49.6681	15.9217	52.5862	56.6074	27.7017	64.5609	49.0781	-0.261387	0.834286	0.593835	0.731178	49.0781	-1.03754	0.487157	0.0374802	0.076273
ATG10	391.923	480.071	519.633	318.05	294.083	398.153	379.098	271.823	454.796	389.737	-0.333479	0.79362	0.163482	0.303651	389.737	-0.390641	0.762791	0.102998	0.176994
ATG101	1552.44	1307.43	1524.76	1463.9	1614.65	1785.43	1350.86	1521.86	1591.07	1523.6	-0.166407	0.891059	0.209476	0.362881	1523.6	-0.141848	0.906357	0.284828	0.396277
ATG12	517.735	334.714	1099.95	403.444	285.654	1169.42	464.009	354.929	978.456	623.146	-1.2291	0.426583	2.05604e-13	4.07859e-12	623.146	-1.73519	0.300369	1.04956e-24	2.02583e-23
ATG13	410.223	764.5	346.422	379.046	571.309	515.846	339.644	590.393	380.192	477.508	-0.138532	0.908443	0.504513	0.659359	477.508	0.632519	1.55027	0.00215008	0.00608259
ATG14	113.612	205.071	136.546	128.963	197.617	100.164	151.811	245.853	96.124	152.862	0.242425	1.18298	0.391346	0.560943	152.862	0.960948	1.94659	0.00059774	0.00188817
ATG16L1	189.099	233.357	77.1232	231.784	147.042	11.2685	133.799	216.42	84.6465	147.171	1.68476	3.21487	0.000484881	0.00238026	147.171	1.79091	3.46032	0.000207542	0.000712532
ATG16L2	224.174	112.357	50.5726	139.419	69.3063	136.474	116.645	87.4336	55.9528	110.259	0.981153	1.97404	0.0230233	0.0663777	110.259	0.146059	1.10654	0.737154	0.814958
ATG2A	276.786	568.071	154.246	278.838	331.546	172.783	232.433	444.959	200.856	295.613	0.579691	1.49453	0.0190999	0.056963	295.613	1.35133	2.55148	3.75694e-08	2.10003e-07
ATG2B	51.8497	196.429	91.0306	78.4233	100.213	63.8547	84.9111	166.21	34.4325	96.3727	0.179072	1.13216	0.676986	0.794366	96.3727	1.28669	2.43967	0.00246533	0.00688675
ATG3	739.621	686.714	1772.57	582.075	821.373	890.209	650.127	561.826	1685.76	932.252	-1.14046	0.453614	7.89213e-07	6.73513e-06	932.252	-1.07093	0.476013	3.52936e-06	1.57462e-05
ATG4A	70.9121	17.2857	79.6518	70.5809	39.336	27.5452	61.7535	21.642	14.3469	44.7838	0.737428	1.6672	0.229261	0.387044	44.7838	-0.64362	0.640105	0.303159	0.415593
ATG4B	1362.58	1522.71	1168.23	1173.73	1536.91	832.615	1010.36	1296.79	1241	1238.33	0.130488	1.09466	0.454539	0.616995	1238.33	0.426886	1.34433	0.0142993	0.0333071
ATG4C	96.0745	68.3571	120.11	157.718	127.374	169.027	105.496	172.27	131.991	127.602	-0.230466	0.852359	0.539818	0.688115	127.602	-0.196463	0.872687	0.601319	0.70161
ATG4D	741.908	759.786	634.686	689.253	807.325	584.708	590.947	567.02	444.753	646.71	0.280267	1.21442	0.151701	0.288741	646.71	0.357707	1.28139	0.0672542	0.124395
ATG5	459.785	454.143	465.268	470.54	367.136	768.76	445.997	434.571	474.881	482.342	-0.313085	0.804919	0.14414	0.277953	482.342	-0.444697	0.734738	0.0383939	0.0779009
ATG7	49.5622	150.857	221.255	54.0249	110.515	142.734	30.8767	121.195	55.9528	104.108	-1.6449	0.319769	0.000282133	0.00145535	104.108	-0.136271	0.909868	0.758853	0.830738
ATG9A	590.934	1045.79	329.986	605.602	1126.7	535.878	697.3	830.187	374.453	681.869	0.609706	1.52595	0.00261712	0.0106163	681.869	1.2747	2.41948	2.68301e-10	1.85154e-09
ATG9B	27.4499	44	24.022	51.4108	14.9851	17.5287	23.1576	16.4479	40.1712	28.797	0.323303	1.25119	0.632282	0.760913	28.797	-0.105945	0.929196	0.876301	0.917942
ATHL1	178.424	344.928	108.731	189.087	204.173	206.589	221.283	208.629	175.032	204.097	0.264012	1.20081	0.391542	0.561125	204.097	0.629475	1.547	0.0404578	0.0815853
ATIC	1738.49	2409.79	2715.75	1489.17	2550.28	1431.1	1301.97	2785.76	2055.91	2053.13	-0.453315	0.730363	0.0184239	0.0553592	2053.13	0.320505	1.24877	0.0949529	0.165501
ATL1	64.8122	76.2143	144.132	84.5229	85.228	87.6437	55.7497	64.0603	97.5587	84.4357	-0.684659	0.622153	0.0624961	0.14792	84.4357	-0.547691	0.684114	0.135517	0.221162
ATL2	281.361	350.428	341.365	365.975	273.479	252.915	371.379	353.197	255.374	316.164	0.260408	1.19782	0.24614	0.406607	316.164	0.201668	1.15003	0.369753	0.485438
ATL3	134.199	168.929	61.9514	142.905	180.758	150.246	134.657	288.271	235.289	166.356	-0.11736	0.921873	0.767177	0.859299	166.356	0.514258	1.42826	0.192543	0.291831
ATM	287.461	222.357	261.713	313.693	292.21	250.41	342.217	323.764	312.762	289.621	0.19444	1.14428	0.379859	0.550717	289.621	0.0235236	1.01644	0.915657	0.94746
ATMIN	522.31	625.428	326.193	640.457	485.144	716.174	639.835	687.349	431.841	563.859	0.289355	1.22209	0.25226	0.414163	563.859	0.286141	1.21937	0.257714	0.366398
ATN1	722.846	991.571	443.774	937.594	847.597	458.251	853.399	1033.62	351.498	737.795	1.00206	2.00286	6.48231e-09	7.58191e-08	737.795	1.1953	2.28993	4.19666e-12	3.38304e-11
ATOH7	7.62496	0	18.9647	2.61411	0	0	3.43075	6.92544	17.2162	6.30847	-1.3991	0.379167	0.410481	0.577992	6.30847	-2.3846	0.191497	0.170203	0.264454
ATOH8	3.04998	6.28571	10.1145	2.61411	0.936572	0	0	10.3882	0	3.70989	-0.839452	0.558856	0.681062	0.797554	3.70989	0.794495	1.73447	0.690047	0.775559
ATOX1	2218.86	1235.14	3846.04	1704.4	1208.18	4464.82	1750.54	1313.24	4592.43	2481.52	-1.1849	0.439855	5.86272e-19	2.017e-17	2481.52	-1.78012	0.291159	2.37995e-40	9.88338e-39
ATP10A	78.5371	74.6428	20.229	71.4523	70.2429	32.5534	108.926	118.598	17.2162	65.822	1.88106	3.68346	3.99613e-05	0.000251114	65.822	1.90665	3.74938	3.15138e-05	0.000123609
ATP10B	3.04998	3.14286	1.26431	4.35685	15.9217	0	1.71537	0	0	3.27234	2.81966	7.05997	0.234234	0.392979	3.27234	3.87902	14.713	0.0988536	0.171085
ATP10D	25.1624	50.2857	42.9867	27.0125	53.3846	68.8629	24.0152	44.1497	0	37.3177	-0.558661	0.678932	0.498139	0.6542	37.3177	0.397486	1.31721	0.627136	0.72323
ATP11A	448.348	872.928	319.872	613.444	703.365	185.304	570.362	909.829	367.28	554.526	0.905135	1.87272	0.000137434	0.000759186	554.526	1.5129	2.85383	1.6372e-10	1.14667e-09
ATP11B	93.787	165.786	78.3875	164.689	126.437	71.367	142.376	200.838	90.3852	126.006	0.739309	1.66938	0.027533	0.0767295	126.006	1.04017	2.05647	0.00187023	0.00536191
ATP11C	744.196	1183.29	455.153	1020.37	1032.1	642.303	1081.54	1230.13	809.163	910.917	0.578722	1.49353	0.0053789	0.0197051	910.917	0.85494	1.80868	3.85445e-05	0.000149021
ATP12A	3.04998	4.71428	0	6.09959	2.80971	1.25205	6.00381	12.1195	0	4.00544	3.54786	11.6953	0.08273	0.183925	4.00544	3.92559	15.1957	0.054221	0.104252
ATP13A1	991.245	1826	797.782	1228.63	1970.55	890.209	1001.78	2030.88	898.114	1292.8	0.316972	1.24571	0.0205183	0.0603683	1292.8	1.17224	2.25361	6.66148e-18	8.34334e-17
ATP13A2	2712.96	4337.14	1643.61	3355.64	5334.71	2630.56	3022.49	4898.01	1652.76	3287.54	0.616728	1.53339	0.00036265	0.00182212	3287.54	1.2972	2.45752	5.97065e-14	5.57566e-13
ATP13A3	260.011	465.143	94.8236	318.05	332.483	82.6355	320.775	390.421	208.03	274.708	1.2266	2.34014	8.53475e-05	0.000495076	274.708	1.62985	3.09481	1.68048e-07	8.79552e-07
ATP1A1	1848.29	5514.93	1671.42	2084.32	4590.14	1667.73	1705.94	5649.42	1391.65	2902.65	0.252695	1.19143	0.0587784	0.140964	2902.65	1.73522	3.3293	6.54216e-39	2.5434e-37
ATP1A1-AS1	25.1624	14.1429	6.32157	24.3984	4.68286	35.0575	33.4498	2.59704	21.5203	18.5925	0.39983	1.31935	0.634122	0.762458	18.5925	-1.54221	0.343359	0.078438	0.141484
ATP1A2	745.721	1492.07	613.192	981.162	1467.61	714.922	834.53	1789.36	522.226	1017.87	0.467712	1.38291	0.00546112	0.019984	1017.87	1.35882	2.56475	4.86448e-16	5.30129e-15
ATP1A3	295.086	300.143	109.995	259.668	368.073	170.279	332.783	425.049	206.595	274.186	0.868891	1.82626	0.000969767	0.00440426	274.186	1.16919	2.24885	8.62089e-06	3.67472e-05
ATP1B1	316.436	256.143	164.361	278.838	196.68	225.369	360.229	342.809	289.807	270.075	0.493535	1.40789	0.0728249	0.166182	270.075	0.229869	1.17273	0.404796	0.519987
ATP1B2	172.324	104.5	63.2157	201.286	106.769	50.0821	201.557	130.718	192.248	135.855	0.917954	1.88943	0.0302363	0.0829141	135.855	0.168049	1.12354	0.693397	0.778037
ATP1B3	4035.13	2634.5	5262.08	3806.14	3198.39	5160.96	3967.66	3223.79	5289.69	4064.26	-0.411993	0.751584	0.000146375	0.000804791	4064.26	-0.795128	0.576292	2.628e-13	2.34622e-12
ATP2A1	24.3999	2.35714	0	7.84233	30.9069	1.25205	7.71919	11.2538	5.73875	10.1633	2.55305	5.86872	0.0548528	0.133519	10.1633	2.70119	6.50336	0.0420521	0.0842014
ATP2A1-AS1	584.072	436.071	946.971	510.623	361.517	897.721	734.18	386.093	989.934	649.687	-0.632062	0.645253	0.000257988	0.0013426	649.687	-1.25889	0.417865	5.60573e-13	4.85702e-12
ATP2A2	1277.18	2420	606.871	1348.01	2210.31	822.598	1457.21	2508.74	919.634	1507.84	0.798174	1.7389	3.05881e-07	2.77759e-06	1507.84	1.60468	3.04129	5.17497e-25	1.01433e-23
ATP2A3	388.873	822.643	275.621	445.27	664.966	185.304	364.517	542.781	209.464	433.271	0.837723	1.78723	0.000169384	0.000918402	433.271	1.5986	3.0285	5.30359e-13	4.61469e-12
ATP2B1	944.732	1031.64	796.518	1433.4	959.049	848.891	1545.55	1105.47	612.611	1030.87	0.79599	1.73627	3.72194e-05	0.000235685	1030.87	0.454738	1.37053	0.0186903	0.0420987
ATP2B2	16.7749	47.9286	6.32157	16.556	26.224	5.00821	26.5883	15.5822	2.86937	18.2059	2.06595	4.1871	0.0149324	0.0463853	18.2059	2.65173	6.28422	0.00166882	0.00483165
ATP2B3	0	10.2143	0	0.87137	0.936572	0	0.857687	0.865679	0	1.52729	3.55989	11.7932	0.339387	0.510027	1.52729	6.37685	83.1042	0.077229	0.139748
ATP2B4	113.612	227.071	73.3302	162.075	272.542	66.3588	138.945	245.853	81.7771	153.507	0.905431	1.8731	0.0013323	0.00583947	153.507	1.75251	3.36945	3.36459e-10	2.30448e-09
ATP2C1	299.661	312.714	150.453	327.635	315.625	262.931	340.502	373.974	131.991	279.498	0.824632	1.77108	0.00178434	0.00755109	279.498	0.875367	1.83448	0.000913005	0.00277889
ATP2C2	43.4623	93.5	16.4361	60.1245	44.0189	0	38.5959	24.239	17.2162	37.5103	2.08762	4.25047	0.00791105	0.0273103	37.5103	2.27564	4.84212	0.00376091	0.0101075
ATP4A	18.2999	6.28571	1.26431	5.22822	3.74629	0	6.8615	24.239	0	7.325	4.55004	23.4261	0.0162986	0.0499219	7.325	4.72033	26.3609	0.0126464	0.0299398
ATP5A1	6201.38	7890.14	7410.15	5442.57	8717.61	7154.23	4687.26	7136.66	6685.64	6813.96	-0.379786	0.768552	0.00239567	0.00982219	6813.96	0.160026	1.11731	0.200344	0.301157
ATP5B	12105.4	14378.6	14667.3	10341.4	16292.6	13199.1	8670.36	13113.3	13741.4	12945.5	-0.419089	0.747897	0.00142703	0.00619031	12945.5	0.0735354	1.05229	0.575606	0.679675
ATP5C1	3196.38	1869.21	6332.95	2669.88	2197.2	5700.59	2591.93	2133.9	4932.45	3513.83	-1.00419	0.498549	3.67054e-14	7.84942e-13	3513.83	-1.4526	0.365362	8.56601e-28	1.97571e-26
ATP5D	7425.18	6982.64	10063.9	5904.4	7943.06	11019.3	6084.43	6750.57	11306.8	8164.48	-0.738306	0.599443	5.83805e-10	7.81813e-09	8164.48	-0.579462	0.669213	1.15605e-06	5.51852e-06
ATP5E	179.949	136.714	616.985	177.759	131.12	749.979	160.388	154.957	681.476	332.148	-1.98292	0.252978	3.9922e-25	2.28751e-23	332.148	-2.27627	0.20643	7.7677e-32	2.17986e-30
ATP5EP2	12.1999	3.14286	25.2863	3.48548	3.74629	35.0575	11.1499	5.19408	18.6509	13.1015	-1.55533	0.34025	0.068564	0.158779	13.1015	-2.71305	0.152507	0.00263253	0.00730419
ATP5F1	1356.48	1170.71	2914.24	1093.57	1752.33	2843.41	1005.21	1275.15	3176.4	1843.05	-1.37006	0.386875	2.03175e-16	5.52265e-15	1843.05	-1.08998	0.469767	5.81972e-11	4.21981e-10
ATP5G1	3448.01	1645.29	6221.69	3035.85	1989.28	6312.85	2822.65	1800.61	5638.32	3657.17	-0.965405	0.512135	8.09694e-16	2.10687e-14	3657.17	-1.74184	0.298988	2.27684e-47	1.26924e-45
ATP5G2	6395.05	3143.64	8416.54	4881.41	3431.6	8328.65	4680.4	2993.52	8415.87	5631.85	-0.656856	0.634259	2.79791e-07	2.55762e-06	5631.85	-1.39487	0.380279	1.41326e-27	3.20566e-26
ATP5G3	6358.45	4440.86	13136.2	5333.65	5599.76	14538.8	4780.75	4809.71	13058.5	8006.31	-1.30604	0.40443	7.04634e-24	3.57645e-22	8006.31	-1.45588	0.364531	3.0106e-29	7.53566e-28
ATP5H	3879.58	3588.36	7990.47	3082.03	3856.8	8321.14	3692.34	3973.47	8648.29	5225.83	-1.22802	0.426902	9.90933e-28	6.90504e-26	5225.83	-1.12826	0.457468	1.13586e-23	2.04145e-22
ATP5I	3968.79	3678.71	9271.22	3195.31	3033.56	9948.81	4053.43	3711.17	10091.6	5661.4	-1.3856	0.382729	1.61415e-28	1.20658e-26	5661.4	-1.49145	0.355655	9.68152e-33	2.81294e-31
ATP5J	3881.1	1663.36	8848.94	3393.98	1818.82	10134.1	3202.6	1711.45	10223.6	4986.44	-1.47877	0.358795	2.44652e-39	4.06394e-37	4986.44	-2.49163	0.177805	7.75608e-107	3.54302e-104
ATP5J2	5606.63	2539.43	11501.5	4445.73	2868.72	12242.6	5092.09	3061.04	12632.4	6665.57	-1.26407	0.416367	5.41112e-27	3.57373e-25	6665.57	-2.10284	0.2328	3.8542e-71	5.19527e-69
ATP5L	3964.22	2060.14	8888.13	3420.13	2510.95	9786.04	3286.66	2388.41	9778.82	5120.39	-1.41471	0.375086	2.46963e-33	2.6202e-31	5120.39	-2.0318	0.244549	1.94886e-66	2.10849e-64
ATP5L2	0	3.92857	0	0	2.80971	7.51231	0	0	1.43469	1.74281	-6.61459	0.0102049	0.0756242	0.171152	1.74281	-0.410547	0.752338	0.878313	0.919639
ATP5O	5661.53	3715.64	13832.9	4556.39	4548.93	14649	4235.26	4066.96	15435.8	7855.82	-1.60324	0.329137	5.02901e-36	6.4611e-34	7855.82	-1.83257	0.280763	1.82782e-46	9.88766e-45
ATP5S	178.424	147.714	347.686	164.689	127.374	354.331	184.403	116.001	423.232	227.095	-1.09195	0.469126	7.79644e-07	6.66732e-06	227.095	-1.52263	0.34805	1.05698e-11	8.18366e-11
ATP5SL	600.084	556.286	833.183	561.162	665.902	783.785	407.402	465.736	773.296	627.426	-0.607306	0.656422	0.00161165	0.00689119	627.426	-0.502473	0.705896	0.00903536	0.0222202
ATP6AP1	978.282	919.285	1185.93	1028.22	1116.39	1414.82	873.126	1005.92	906.722	1047.63	-0.28531	0.820565	0.0969923	0.20739	1047.63	-0.206709	0.866511	0.22913	0.33458
ATP6AP1L	10.6749	6.28571	5.05726	23.527	0	2.5041	10.2922	5.19408	4.30406	7.53771	1.90758	3.7518	0.124129	0.249243	7.53771	-0.0324898	0.977731	0.979851	0.990695
ATP6AP2	555.859	435.286	527.219	691.868	437.379	870.176	734.18	410.332	479.185	571.276	0.0775079	1.05519	0.727433	0.831258	571.276	-0.549543	0.683236	0.013965	0.03264
ATP6V0A1	292.798	522.5	134.017	362.49	574.118	156.507	277.891	673.499	248.201	360.224	0.796128	1.73643	0.0013315	0.00583752	360.224	1.71989	3.29412	2.94388e-12	2.40736e-11
ATP6V0A2	396.498	350.428	450.096	631.743	352.151	355.583	470.87	451.885	522.226	442.387	0.175288	1.12919	0.44012	0.60476	442.387	-0.201021	0.869935	0.377834	0.493799
ATP6V0A4	9.14995	7.85714	7.58589	0.87137	22.4777	0	7.71919	12.1195	35.8672	11.5164	-1.28035	0.411695	0.314078	0.483028	11.5164	-0.0282052	0.98064	0.982	0.992328
ATP6V0B	3757.58	1910.86	6286.17	3472.41	2594.3	6977.69	3073.95	2275.01	7127.52	4163.94	-0.984621	0.505358	1.04735e-13	2.14758e-12	4163.94	-1.5889	0.332424	5.44705e-33	1.61983e-31
ATP6V0C	3387.01	2290.36	3261.93	3658.01	3378.21	4243.21	3584.28	2855.88	3636.93	3366.2	-0.0680539	0.953924	0.646949	0.77173	3366.2	-0.386689	0.764883	0.00933312	0.0228738
ATP6V0D1	717.509	1303.5	997.544	738.05	1587.49	589.717	623.539	1544.37	890.94	999.184	-0.252887	0.839216	0.179386	0.323856	999.184	0.839946	1.78998	7.23805e-06	3.11433e-05
ATP6V0E1	1152.89	696.928	2615.87	1256.52	795.149	3151.42	1049.81	890.784	2912.41	1613.53	-1.32723	0.398531	9.53912e-22	4.13907e-20	1613.53	-1.86537	0.274453	8.06954e-41	3.42903e-39
ATP6V0E2	776.983	768.428	967.2	805.146	1039.59	942.795	664.708	825.858	896.679	854.155	-0.321076	0.800473	0.0434912	0.111196	854.155	-0.0925742	0.937848	0.559809	0.665322
ATP6V0E2-AS1	24.3999	18.8571	0	23.527	23.4143	0	35.1652	56.2692	0	20.1814	9.16137	572.595	0.00081284	0.00375904	20.1814	9.40727	679.003	0.000584189	0.00184714
ATP6V1A	478.847	640.357	303.435	516.722	577.865	255.419	510.324	703.797	193.683	464.494	0.998106	1.99738	3.7037e-07	3.3174e-06	464.494	1.35049	2.54998	5.29191e-12	4.22454e-11
ATP6V1B1	0	0	0	0	0	0	0	6.05976	0	0.673306	0	1	1	1	0.673306	5.3842	41.7645	0.241246	0.348591
ATP6V1B2	282.123	327.643	230.105	359.004	280.971	557.163	206.703	323.764	328.543	321.78	-0.396856	0.759512	0.188322	0.335095	321.78	-0.259351	0.835464	0.389637	0.505051
ATP6V1C1	263.061	265.571	348.951	324.15	248.191	292.98	364.517	216.42	139.165	273.667	0.282368	1.21619	0.342894	0.513	273.667	-0.0993376	0.933461	0.739534	0.816821
ATP6V1C2	38.1248	47.9286	26.5506	49.6681	44.0189	42.5698	22.2999	44.1497	38.7365	39.3385	0.0302506	1.02119	0.953237	0.975299	39.3385	0.336632	1.26281	0.512028	0.622521
ATP6V1D	389.635	287.571	888.813	392.116	457.984	987.869	342.217	244.987	906.722	544.213	-1.3082	0.403824	1.87022e-09	2.34598e-08	544.213	-1.4922	0.355469	8.26191e-12	6.47603e-11
ATP6V1E1	900.508	886.286	1408.45	747.635	875.694	1244.54	879.13	1089.02	1319.91	1039.02	-0.652307	0.636262	8.63881e-06	6.19831e-05	1039.02	-0.478713	0.717618	0.00107959	0.00324391
ATP6V1E2	36.5998	15.7143	24.022	34.8548	5.61943	26.2931	46.3151	52.8064	27.259	29.9427	0.602578	1.51843	0.405424	0.573375	29.9427	-0.0636081	0.956868	0.930641	0.957251
ATP6V1F	2075.51	738.571	2610.81	1891.74	936.572	3398.07	1838.02	973.889	3292.61	1972.87	-0.679885	0.624215	3.36898e-06	2.58409e-05	1972.87	-1.8125	0.284698	1.1649e-34	3.75624e-33
ATP6V1G1	2265.38	743.286	4173.5	2236.81	725.843	3577.11	2335.48	708.126	3586.72	2261.36	-0.729631	0.603058	2.78155e-11	4.31942e-10	2261.36	-2.38048	0.192045	5.93135e-100	2.3224e-97
ATP6V1G2	17.5374	0.785714	17.7004	9.58507	13.112	2.5041	16.2961	0.865679	4.30406	9.18783	0.822201	1.7681	0.508433	0.662102	9.18783	-0.750351	0.594459	0.556596	0.662173
ATP6V1H	195.199	330	372.973	154.232	214.475	38.8136	194.695	298.659	375.888	241.659	-0.533189	0.691026	0.462578	0.623449	241.659	0.0987074	1.07081	0.891718	0.92965
ATP7A	15.2499	13.3571	1.26431	11.3278	14.0486	3.75616	14.5807	27.7017	0	11.254	2.99793	7.98853	0.00949411	0.031721	11.254	3.41801	10.6886	0.00300121	0.00822582
ATP7B	48.7997	49.5	35.4008	88.0083	111.452	88.8957	46.3151	199.972	30.1284	77.608	0.241838	1.1825	0.666382	0.785961	77.608	1.22083	2.33081	0.028382	0.0602792
ATP8A1	70.9121	128.071	53.1012	101.95	58.0674	28.7972	77.1919	124.658	38.7365	75.7206	1.05062	2.07142	0.0178934	0.0540118	75.7206	1.36691	2.57918	0.00200381	0.00569821
ATP8A2	48.7997	122.571	56.8941	59.2531	129.247	20.0328	58.3227	88.2993	37.3018	68.9691	0.541918	1.45591	0.22516	0.382096	68.9691	1.5742	2.9777	0.000357816	0.00117827
ATP8B1	3.81248	22	8.8502	16.556	25.2874	1.25205	17.1537	15.5822	15.7815	14.0306	0.543042	1.45704	0.578515	0.719981	14.0306	1.29152	2.44785	0.182323	0.279666
ATP8B2	632.872	761.357	232.634	771.162	587.23	267.939	846.537	618.961	210.899	547.732	1.65959	3.15926	6.00457e-18	1.86312e-16	547.732	1.4667	2.76389	2.6501e-14	2.53672e-13
ATP8B3	6.09997	13.3571	0	23.527	2.80971	25.041	22.2999	63.1946	0	17.3699	1.04256	2.05988	0.439016	0.603647	17.3699	1.65635	3.15217	0.217543	0.321053
ATP9A	60.9997	172.071	35.4008	142.033	174.202	38.8136	94.3456	226.808	61.6915	111.818	1.13309	2.19328	0.00426712	0.0162532	111.818	2.0815	4.23247	1.18957e-07	6.30847e-07
ATP9B	109.037	163.429	97.3522	115.021	148.915	88.8957	108.069	196.509	73.169	122.266	0.354114	1.2782	0.228875	0.386708	122.266	0.970061	1.95892	0.000872847	0.00266852
ATPAF1	927.957	672.571	1230.18	818.216	554.45	1090.54	766.773	356.66	1483.47	877.868	-0.597651	0.660829	0.00447475	0.0168972	877.868	-1.26342	0.416555	2.24306e-09	1.41819e-08
ATPAF2	314.911	297.786	399.523	267.51	308.132	405.665	235.864	300.391	284.068	312.65	-0.413365	0.75087	0.0561502	0.135982	312.65	-0.26688	0.831115	0.216911	0.320293
ATPIF1	7888.02	4810.93	13710.2	6808.01	4630.41	15690.7	7793.81	4750.85	17065.6	9238.73	-1.04681	0.484036	2.09803e-21	8.77914e-20	9238.73	-1.711	0.305448	3.68862e-54	2.68404e-52
ATR	120.474	221.571	68.273	96.722	137.676	60.0985	154.384	186.121	107.601	128.102	0.659365	1.57939	0.0591344	0.141573	128.102	1.21404	2.31986	0.000475318	0.00152728
ATRAID	3601.27	1680.64	5627.46	3497.68	2093.24	5964.78	3495.08	1907.96	5945.34	3757.05	-0.727141	0.6041	1.7737e-11	2.80197e-10	3757.05	-1.62648	0.323878	1.75761e-50	1.11169e-48
ATRIP	118.187	222.357	88.502	119.378	129.247	76.3752	76.3342	373.108	117.644	146.792	0.154393	1.11295	0.693339	0.806362	146.792	1.36157	2.56964	0.000444149	0.00143554
ATRN	196.724	523.286	117.581	273.61	408.345	127.709	201.557	452.75	80.3424	264.656	1.04033	2.05669	5.05159e-05	0.000309513	264.656	2.08447	4.2412	2.37987e-16	2.66238e-15
ATRNL1	65.5746	59.7143	192.176	118.506	66.4966	204.085	68.615	66.6573	121.948	107.086	-1.03937	0.48654	0.00360304	0.0140408	107.086	-1.42815	0.371608	7.43963e-05	0.000274932
ATRX	1049.19	1759.21	1955.89	1639.05	1711.12	1556.3	1561.85	2191.03	1962.65	1709.59	-0.365556	0.77617	0.0407289	0.105759	1709.59	0.0485119	1.0342	0.785669	0.851615
ATXN1	2.28749	11.7857	2.52863	4.35685	2.80971	26.2931	1.71537	5.19408	0	6.3301	-1.79444	0.288283	0.228307	0.385869	6.3301	-0.543702	0.686008	0.707649	0.790201
ATXN10	1190.26	1689.29	1369.25	1137.14	1449.81	1204.47	1139.87	1383.36	1391.65	1328.34	-0.193261	0.874627	0.139018	0.271483	1328.34	0.190273	1.14098	0.144033	0.231741
ATXN1L	133.437	295.429	59.4228	157.718	243.509	161.515	192.122	342.809	67.4303	183.71	0.741386	1.67178	0.0393776	0.102853	183.71	1.60968	3.05183	6.79665e-06	2.93902e-05
ATXN2	364.473	491.857	365.387	334.606	327.8	204.085	411.69	551.438	309.892	373.47	0.337476	1.26354	0.188761	0.335622	373.47	0.641847	1.56033	0.0122699	0.0291209
ATXN2L	722.846	849.357	506.99	786.847	746.448	611.002	765.057	1067.38	446.187	722.457	0.539152	1.45312	0.00281668	0.0113308	722.457	0.766922	1.70164	2.09426e-05	8.45572e-05
ATXN3	198.249	114.714	667.558	155.975	188.251	683.621	212.706	113.404	595.395	325.541	-1.77954	0.291276	9.7396e-14	2.0046e-12	325.541	-2.22834	0.213404	2.97483e-20	4.38754e-19
ATXN7	51.0872	73.0714	42.9867	40.9544	59.9406	22.5369	70.3304	66.6573	4.30406	47.9854	1.20759	2.30952	0.0471809	0.118511	47.9854	1.50642	2.84104	0.0130886	0.0308459
ATXN7L1	487.235	403.071	388.144	632.614	371.819	321.777	597.808	459.676	321.37	442.613	0.734922	1.66431	9.98384e-05	0.00057048	442.613	0.259258	1.19686	0.172535	0.26737
ATXN7L2	107.512	69.9286	64.48	118.506	84.2914	93.9039	102.065	59.7319	142.034	93.6059	0.130395	1.09459	0.723217	0.828622	93.6059	-0.487224	0.713397	0.190758	0.289874
ATXN7L3	585.597	965.643	242.748	794.689	1048.96	404.413	714.454	1143.56	499.271	711.037	0.870989	1.82892	0.000116747	0.000656601	711.037	1.46356	2.75787	8.55902e-11	6.13838e-10
ATXN7L3B	819.683	962.5	399.523	835.644	854.153	519.602	1072.97	1118.46	482.055	784.954	0.961331	1.94711	7.23313e-08	7.15267e-07	784.954	1.06712	2.09524	2.23192e-09	1.41169e-08
AUH	491.047	180.714	531.012	466.183	214.475	406.917	440.851	152.36	309.892	354.828	0.162893	1.11953	0.477573	0.636544	354.828	-1.1905	0.438152	3.53162e-07	1.79196e-06
AUNIP	353.798	192.5	298.378	283.195	90.8474	241.646	257.306	113.404	450.491	253.507	-0.14565	0.903972	0.640726	0.767019	253.507	-1.3157	0.401731	3.17004e-05	0.00012427
AUP1	2154.05	1602.86	2614.6	2287.35	2561.52	2885.98	2028.43	2055.99	2767.51	2328.7	-0.353838	0.782499	0.0226002	0.0653757	2328.7	-0.411019	0.752092	0.00811098	0.0202037
AURKA	738.096	926.357	1002.6	733.693	891.616	796.305	761.626	676.961	896.679	824.882	-0.271339	0.82855	0.0967371	0.206979	824.882	-0.111444	0.925661	0.4947	0.606106
AURKAIP1	11693.6	10912.8	17863.5	10453	12491.1	20299.5	10186.8	10582.1	20323.8	13867.3	-0.855024	0.552856	3.29938e-15	7.84081e-14	13867.3	-0.783206	0.581074	5.29845e-13	4.61265e-12
AURKAPS1	9.91245	2.35714	0	1.74274	0	3.75616	10.2922	7.79111	22.955	6.53409	-0.273637	0.827232	0.863317	0.923133	6.53409	-1.38474	0.382958	0.392661	0.50801
AURKB	1768.23	1167.57	1710.62	1529.25	1675.53	2297.52	1496.66	1379.89	1575.29	1622.28	-0.220071	0.858523	0.203086	0.354651	1622.28	-0.40366	0.755938	0.0196954	0.0440287
AURKC	19.8249	33	8.8502	20.0415	11.2389	5.00821	27.446	0	11.4775	15.2097	1.41351	2.66384	0.196026	0.345329	15.2097	0.812799	1.75662	0.45995	0.573368
AUTS2	1203.22	1718.36	528.483	1359.34	1507.88	520.854	1490.66	1910.55	754.645	1221.55	1.16932	2.24906	1.09561e-11	1.77861e-10	1221.55	1.51143	2.85092	1.4656e-18	1.92969e-17
AVEN	221.886	269.5	249.07	118.506	184.505	346.818	343.075	245.853	175.032	239.361	-0.174802	0.885889	0.623312	0.753748	239.361	-0.140089	0.907463	0.693899	0.778442
AVL9	139.537	161.071	233.898	176.017	194.807	116.441	175.826	192.181	175.032	173.868	-0.0970459	0.934945	0.742888	0.843146	173.868	0.0605613	1.04287	0.837579	0.88986
AVP	5.33747	11	5.05726	6.97096	0	16.2767	2.57306	7.79111	1.43469	6.27125	-0.619841	0.650743	0.665467	0.785389	6.27125	-0.276516	0.825582	0.846268	0.896013
AVPI1	319.486	354.357	305.964	343.32	483.271	269.191	247.014	278.749	428.971	336.703	-0.14073	0.90706	0.590073	0.728839	336.703	0.153665	1.11239	0.555523	0.661277
AVPR2	4.57498	3.14286	0	0	0	0	0.857687	0	0	0.952835	5.23086	37.5531	0.251305	0.412868	0.952835	4.44715	21.8135	0.332302	0.447503
AXDND1	3.04998	0.785714	10.1145	0.87137	9.36572	5.00821	0	0	1.43469	3.40335	-2.06626	0.238777	0.297069	0.463721	3.40335	-0.719962	0.607113	0.707015	0.789654
AXIN1	620.672	829.714	336.308	692.739	646.234	282.964	650.127	904.635	331.413	588.312	1.04678	2.06592	5.09911e-09	6.0545e-08	588.312	1.32531	2.50587	1.23034e-13	1.12656e-12
AXIN2	93.0245	102.929	42.9867	89.7511	31.8434	53.8382	60.8958	115.135	2.86937	65.9192	1.28274	2.433	0.0565182	0.136622	65.9192	1.32012	2.49686	0.0497155	0.0968501
AXL	420.135	818.714	254.127	470.54	896.299	430.706	360.229	915.889	304.153	541.199	0.338149	1.26413	0.105313	0.220424	541.199	1.41065	2.65856	9.66574e-12	7.52263e-11
AZGP1	6.09997	29.0714	39.1937	5.22822	14.0486	30.0493	12.0076	8.65679	15.7815	17.793	-1.87024	0.273528	0.021056	0.0616828	17.793	-0.714227	0.609532	0.363458	0.479085
AZI2	256.961	247.5	390.673	246.598	263.177	394.396	252.16	239.793	378.757	296.668	-0.622996	0.649321	0.000658276	0.003126	296.668	-0.633584	0.644573	0.000542498	0.00172627
AZIN1	541.372	765.286	481.704	630.872	581.611	648.563	522.332	631.08	548.05	594.541	0.0135157	1.00941	0.940877	0.968074	594.541	0.237482	1.17893	0.191755	0.290985
AZIN1-AS1	27.4499	3.92857	63.2157	20.9129	17.7949	15.0246	20.5845	18.1793	63.1262	27.8018	-1.03302	0.488685	0.156291	0.294444	27.8018	-1.83017	0.281232	0.0136899	0.0321065
AZIN2	32.7873	59.7143	15.1718	26.1411	41.2091	2.5041	28.3037	24.239	14.3469	27.1575	1.45379	2.73926	0.0423562	0.108887	27.1575	1.97527	3.93201	0.0055541	0.014377
AZU1	9.14995	3.92857	17.7004	9.58507	0.936572	3.75616	12.8653	0.865679	7.17343	7.32902	0.140018	1.10192	0.901726	0.94584	7.32902	-2.29878	0.203235	0.0638564	0.119088
B2M	1242.87	376.357	2335.19	1210.33	507.622	2862.19	995.775	307.316	2153.46	1332.35	-1.09181	0.469174	2.54283e-09	3.13235e-08	1332.35	-2.62668	0.161916	2.65283e-45	1.37188e-43
B3GALNT1	25.1624	36.1428	1.26431	16.556	35.5897	33.8054	36.0229	16.4479	73.169	30.4623	-0.473054	0.720438	0.584372	0.724845	30.4623	-0.291239	0.8172	0.735972	0.813848
B3GALNT2	305.761	482.428	228.841	409.544	286.591	305.501	277.033	471.795	262.548	336.671	0.315975	1.24485	0.215744	0.370849	336.671	0.639591	1.55789	0.0120219	0.0285942
B3GALT1	26.6874	18.8571	1.26431	24.3984	11.2389	18.7808	51.4612	7.79111	40.1712	22.2945	0.774721	1.71086	0.378438	0.549247	22.2945	-0.658226	0.633657	0.462918	0.576587
B3GALT4	96.0745	71.5	75.8589	90.6224	80.5452	78.8793	97.7764	46.7467	68.8649	78.5409	0.346562	1.27153	0.334766	0.505298	78.5409	-0.171259	0.888067	0.637436	0.732079
B3GALT5	18.2999	11.7857	5.05726	14.8133	7.49257	16.2767	12.0076	25.9704	4.30406	12.8897	0.808771	1.75172	0.383686	0.554241	12.8897	0.812671	1.75646	0.381775	0.497448
B3GALT5-AS1	300.423	199.571	255.391	213.486	250.065	217.857	275.318	235.465	232.419	242.222	0.162194	1.11899	0.480111	0.639047	242.222	-0.0436788	0.970178	0.849791	0.898702
B3GALT6	484.947	721.286	286.999	574.233	664.029	336.802	513.755	954.844	345.759	542.517	0.698356	1.62265	0.000254544	0.0013272	542.517	1.27193	2.41484	2.19749e-11	1.64862e-10
B3GAT1	224.936	436.857	123.903	249.212	324.054	182.8	222.141	454.482	147.773	262.906	0.614797	1.53134	0.0107574	0.0351212	262.906	1.41931	2.67457	2.85653e-09	1.78547e-08
B3GAT2	6.09997	7.85714	5.05726	8.7137	5.61943	7.51231	3.43075	12.1195	8.60812	7.22424	-0.21276	0.862885	0.84331	0.910586	7.22424	0.277525	1.21211	0.794383	0.857813
B3GAT3	1929.11	1433.93	1682.8	1981.49	1864.71	2012.05	1941.8	1444.82	1780.45	1785.69	0.0959669	1.06878	0.483865	0.642113	1785.69	-0.207555	0.866004	0.130836	0.215181
B3GLCT	131.912	128.857	36.6651	88.8797	106.769	46.3259	116.645	69.2544	68.8649	88.2415	1.15743	2.2306	0.00379145	0.014688	88.2415	1.01108	2.01541	0.0116389	0.0277958
B3GNT2	302.711	509.143	297.114	413.901	553.514	274.199	375.667	434.571	304.153	384.997	0.318787	1.24728	0.108594	0.225884	384.997	0.774391	1.71047	8.9724e-05	0.000326874
B3GNT3	30.4998	3.92857	46.7796	26.1411	18.7314	40.0657	24.0152	26.8361	20.0856	26.3426	-0.408933	0.75318	0.565421	0.709897	26.3426	-1.11949	0.460255	0.120944	0.201614
B3GNT4	32.0248	21.2143	13.9075	27.8838	24.3509	33.8054	14.5807	16.4479	93.2546	30.83	-0.913914	0.530743	0.194419	0.343234	30.83	-1.18043	0.44122	0.0956426	0.166474
B3GNT5	31.2623	33	50.5726	53.1535	16.8583	110.181	38.5959	88.2993	22.955	49.4308	-0.582449	0.667829	0.381226	0.551955	49.4308	-0.413222	0.750944	0.533954	0.64171
B3GNT6	0.762496	0	0	0	9.36572	0	0	0	0	1.12536	2.42266	5.36159	0.6137	0.746004	1.12536	6.0092	64.4092	0.189808	0.288938
B3GNT7	685.484	913.785	398.259	841.743	1107.96	351.827	843.964	1248.31	314.196	745.059	1.15426	2.22571	8.12646e-11	1.20396e-09	745.059	1.61806	3.06962	6.51677e-20	9.47554e-19
B3GNT8	38.8873	46.3571	44.251	38.3403	49.6383	83.8875	36.8806	48.478	61.6915	49.8235	-0.734577	0.600994	0.0944285	0.203496	49.8235	-0.394739	0.760627	0.365393	0.481172
B3GNT9	118.187	44	22.7577	116.764	57.1309	185.304	89.1995	63.1946	0	77.393	0.638695	1.55692	0.640843	0.767061	77.393	-0.341549	0.789193	0.80328	0.864638
B3GNTL1	321.773	189.357	231.37	262.282	270.669	211.597	229.86	181.793	269.721	240.936	0.193393	1.14345	0.441267	0.605905	240.936	-0.151439	0.900352	0.548644	0.654952
B4GALNT1	26.6874	18.8571	3.79294	24.3984	11.2389	2.5041	21.4422	0.865679	8.60812	13.155	2.29697	4.91425	0.0284687	0.078825	13.155	1.07251	2.10309	0.313708	0.427524
B4GALNT3	85.3995	123.357	26.5506	133.32	96.4669	48.83	96.9187	31.1645	60.2568	78.0293	1.22093	2.33097	0.0167279	0.0510183	78.0293	0.891714	1.85538	0.0815256	0.145945
B4GALNT4	1229.91	1594.21	555.034	1542.32	1392.68	597.229	1450.35	1875.06	668.564	1211.71	1.214	2.3198	1.3968e-14	3.11675e-13	1211.71	1.41783	2.67183	2.33719e-19	3.27108e-18
B4GALT1	308.811	424.286	101.145	403.444	374.629	150.246	390.248	425.914	197.987	308.523	1.29786	2.45863	2.36145e-07	2.17924e-06	308.523	1.45042	2.73288	7.4421e-09	4.45686e-08
B4GALT1-AS1	6.86246	0	25.2863	0	0	0	2.57306	0	0	3.85798	-1.41974	0.37378	0.548176	0.694992	3.85798	-8.05899	0.00374976	0.0218085	0.04803
B4GALT2	704.546	967.214	493.083	804.274	708.985	708.662	816.518	876.068	612.611	743.551	0.357739	1.28142	0.048283	0.120598	743.551	0.492882	1.40725	0.00647725	0.0165094
B4GALT3	844.845	470.643	394.466	764.191	582.548	668.596	816.518	588.662	638.435	640.989	0.512149	1.42617	0.0115173	0.03724	640.989	-0.0514151	0.964989	0.800671	0.862338
B4GALT4	353.036	300.143	184.59	368.589	316.561	369.355	403.971	235.465	404.582	326.255	0.232877	1.17518	0.389596	0.559555	326.255	-0.16858	0.889718	0.534997	0.642661
B4GALT5	920.333	1148.71	321.136	1433.4	976.844	451.991	1538.69	1462.13	400.277	961.502	1.72971	3.31661	1.60631e-15	4.00847e-14	961.502	1.61255	3.05791	1.13368e-13	1.04037e-12
B4GALT6	86.9245	98.2143	48.0439	99.3361	73.0526	13.7726	142.376	107.344	78.9077	83.108	1.22985	2.34543	0.0140809	0.0441239	83.108	0.992678	1.98988	0.0480333	0.0942273
B4GALT7	1414.43	1210	1571.54	1461.29	1364.58	1446.12	1205.05	866.545	1553.77	1343.7	-0.163693	0.892737	0.32661	0.496543	1343.7	-0.409889	0.752682	0.0142057	0.0331271
B4GAT1	1044.62	1045	976.051	1296.6	1478.85	1273.34	1175.89	1184.25	1070.28	1171.65	0.0829534	1.05918	0.621417	0.752463	1171.65	0.158975	1.11649	0.343872	0.459231
B9D1	858.57	546.071	898.927	691.868	607.835	1158.15	635.546	500.363	939.72	759.672	-0.454861	0.729581	0.00849337	0.0289599	759.672	-0.857813	0.551788	7.85474e-07	3.84016e-06
B9D2	176.137	173.643	257.92	158.589	202.299	182.8	150.953	202.569	164.989	185.544	-0.319521	0.801336	0.217936	0.37325	185.544	-0.0683266	0.953744	0.791509	0.855721
BAALC	100.649	64.4286	166.889	67.0955	82.4183	222.865	125.222	83.9709	129.122	115.851	-0.825739	0.564193	0.0175994	0.0532907	115.851	-1.17138	0.443995	0.000832592	0.00255543
BAALC-AS2	0.762496	0	0	0.87137	0	7.51231	0	0	4.30406	1.49447	-2.85023	0.138674	0.321997	0.491235	1.49447	-6.95907	0.00803731	0.0644672	0.119893
BABAM1	4420.19	2464	4677.96	3839.25	2916.48	4633.85	3508.8	2043	4418.83	3658.04	-0.222437	0.857116	0.112216	0.231717	3658.04	-0.887452	0.540568	2.58969e-10	1.79014e-09
BACE1	113.612	151.643	78.3875	95.8507	125.501	42.5698	87.4841	206.032	90.3852	110.163	0.494901	1.40922	0.178616	0.322784	110.163	1.19684	2.29237	0.00104434	0.00314718
BACE1-AS	3.04998	0.785714	0	0.87137	11.2389	1.25205	0.857687	17.3136	15.7815	5.68342	-1.80714	0.285757	0.287137	0.452269	5.68342	0.795873	1.73613	0.620623	0.717774
BACE2	141.062	154.786	112.524	141.162	165.773	125.205	164.676	219.017	76.0384	144.471	0.506762	1.42086	0.0907669	0.197756	144.471	0.778614	1.71548	0.00914572	0.0224547
BACH1	112.849	238.857	221.255	138.548	219.158	102.668	190.407	258.838	196.552	186.57	-0.236367	0.84888	0.460395	0.621762	186.57	0.463035	1.37844	0.14535	0.233335
BACH2	31.2623	60.5	27.8149	14.8133	29.0337	3.75616	30.8767	75.3141	22.955	32.9251	0.502148	1.41632	0.483107	0.641529	32.9251	1.60091	3.03334	0.0237284	0.0516839
BAD	1367.16	913	2488.17	1189.42	1057.39	2684.4	1098.7	1082.96	2223.76	1567.22	-1.01674	0.494231	1.45611e-13	2.94535e-12	1567.22	-1.27705	0.412639	2.13815e-20	3.19363e-19
BAG1	2708.39	2052.29	3303.65	2230.71	2544.66	4340.87	2289.17	1970.29	3988.43	2825.38	-0.686301	0.621445	2.37618e-06	1.86432e-05	2825.38	-0.825068	0.564456	1.44529e-08	8.41636e-08
BAG2	132.674	53.4286	337.572	152.49	84.2914	350.575	108.069	99.5531	63.1262	153.531	-0.935572	0.522835	0.0467908	0.117711	153.531	-1.66552	0.315232	0.000440931	0.0014257
BAG3	105.987	175.214	111.26	95.8507	280.035	196.572	152.668	135.046	32.9978	142.848	0.053326	1.03765	0.911457	0.951193	142.848	0.788545	1.72733	0.0987478	0.170966
BAG4	197.486	187	192.176	217.842	268.796	162.767	288.183	232.002	229.55	219.534	0.268342	1.20442	0.306053	0.474278	219.534	0.235181	1.17705	0.370228	0.485866
BAG5	234.849	317.428	433.66	326.764	369.009	289.224	346.506	334.152	430.406	342.444	-0.344988	0.787315	0.136317	0.267479	342.444	-0.176023	0.885139	0.446601	0.560638
BAG6	1296.24	3099.64	871.113	1320.13	2953.95	1108.07	1395.46	3064.51	1149.18	1806.48	0.359376	1.28287	0.0057641	0.0209111	1806.48	1.54398	2.91598	6.94577e-33	2.04701e-31
BAHCC1	14.4874	7.85714	1.26431	15.6847	14.9851	0	18.0114	3.46272	0	8.41698	5.20835	36.9718	0.0034925	0.0136638	8.41698	4.33174	20.1365	0.0156581	0.0360995
BAHD1	465.885	1128.29	228.841	523.693	697.746	302.997	482.878	979.949	235.289	560.618	0.939609	1.91801	7.2269e-06	5.24245e-05	560.618	1.87069	3.65707	2.51815e-19	3.51835e-18
BAIAP2	353.798	319.786	361.594	347.676	567.562	319.273	398.825	502.96	355.802	391.92	0.0860632	1.06147	0.704088	0.81437	391.92	0.422487	1.34024	0.0615434	0.115706
BAIAP2-AS1	261.536	485.571	94.8236	379.917	318.434	102.668	318.202	514.214	245.331	302.3	1.11996	2.1734	0.000776888	0.00360902	302.3	1.57875	2.98711	2.06336e-06	9.51006e-06
BAIAP2L1	597.797	719.714	436.188	650.042	703.365	679.864	625.254	964.367	711.604	676.466	0.0360075	1.02527	0.860233	0.921118	676.466	0.386184	1.30693	0.0584481	0.110863
BAIAP2L2	86.162	117.857	82.1804	81.9087	65.56	27.5452	72.9034	61.4632	86.0812	75.7401	0.302469	1.23325	0.519196	0.671504	75.7401	0.327301	1.25466	0.485635	0.598312
BAIAP3	67.8621	113.929	75.8589	59.2531	83.3549	36.3095	81.4803	61.4632	86.0812	73.9546	0.0763256	1.05433	0.860783	0.921407	73.9546	0.388375	1.30892	0.370467	0.486142
BAK1	368.286	466.714	571.47	386.888	605.025	545.895	357.656	457.944	543.746	478.18	-0.578105	0.669843	0.000919693	0.00419538	478.18	-0.119912	0.920244	0.489114	0.601292
BAMBI	530.697	407.786	460.21	470.54	572.245	847.639	550.635	567.02	384.496	532.363	-0.125989	0.916376	0.628216	0.757572	532.363	-0.131021	0.913185	0.61468	0.712713
BANCR	3.81248	0	5.05726	6.97096	8.42914	0	5.14612	0	18.6509	5.34076	-0.568523	0.674307	0.751971	0.849616	5.34076	-1.50104	0.353297	0.411637	0.526595
BANF1	1999.26	1017.5	2887.69	1747.97	1183.83	3256.59	1705.94	994.666	2791.9	1953.93	-0.712499	0.610262	2.21693e-08	2.38908e-07	1953.93	-1.48399	0.357499	6.23444e-31	1.68905e-29
BANK1	4.57498	7.07143	0	3.48548	0	0	11.1499	26.8361	0	5.90199	7.04809	132.339	0.0216372	0.0629887	5.90199	7.86963	233.881	0.0101862	0.024725
BANP	412.51	452.571	294.585	395.602	683.697	463.259	372.236	457.944	284.068	424.053	0.178966	1.13207	0.454489	0.616978	424.053	0.611731	1.52809	0.0103421	0.0250553
BAP1	1425.1	1781.21	840.769	1467.39	1465.73	713.67	1420.33	1602.37	966.979	1298.17	0.775384	1.71165	7.56799e-08	7.47931e-07	1298.17	0.944865	1.92501	5.47968e-11	3.98555e-10
BARD1	555.859	849.357	531.012	605.602	791.403	443.227	830.241	769.589	517.922	654.912	0.416482	1.33467	0.0230954	0.066555	654.912	0.692308	1.61587	0.000154703	0.000542336
BARX1	12.9624	18.8571	0	17.4274	6.556	53.8382	7.71919	6.05976	0	13.7134	-0.502423	0.70592	0.713581	0.82123	13.7134	-0.775318	0.58426	0.572292	0.676881
BASP1	4440.01	3182.93	3967.42	3870.62	4038.5	4344.62	4967.73	3208.21	4014.25	4003.81	0.107313	1.07722	0.417195	0.584045	4003.81	-0.241293	0.845987	0.0684532	0.126258
BATF2	32.0248	69.9286	102.409	24.3984	22.4777	43.8218	24.0152	3.46272	5.73875	36.4753	-0.919627	0.528646	0.310605	0.478985	36.4753	-0.664091	0.631086	0.463283	0.576876
BATF3	133.437	124.143	164.361	81.9087	55.2577	96.408	155.241	55.4035	136.295	111.384	-0.098914	0.933736	0.80952	0.887653	111.384	-0.754314	0.592828	0.0684191	0.126209
BAX	9125.55	3666.93	6396.17	7904.19	4032.88	6377.95	8339.29	3518.12	5833.43	6132.72	0.447139	1.36333	1.88228e-05	0.000126343	6132.72	-0.7303	0.602779	3.43678e-12	2.78963e-11
BAZ1A	645.834	613.643	934.328	839.129	544.148	856.404	784.784	835.381	984.195	781.983	-0.290073	0.817861	0.11606	0.2373	781.983	-0.476941	0.7185	0.00991802	0.0241346
BAZ1B	1322.93	1921.86	1447.64	1449.96	2075.44	1105.56	1508.67	2204.89	1394.52	1603.5	0.117258	1.08467	0.394535	0.563928	1603.5	0.651973	1.57132	2.05047e-06	9.45332e-06
BAZ2A	1151.37	4710.36	721.923	1282.66	2999.84	667.344	1340.57	3790.81	390.235	1895.01	1.08321	2.11875	1.5914e-07	1.4912e-06	1895.01	2.69083	6.45684	5.07046e-39	1.98532e-37
BAZ2B	311.098	436.857	458.946	474.025	397.106	433.21	466.582	403.407	367.28	416.501	-0.0106516	0.992644	0.959109	0.979104	416.501	-0.0260007	0.982139	0.90048	0.936055
BBC3	659.559	491.857	386.88	508.88	484.208	250.41	672.427	418.123	289.807	462.461	0.989452	1.98543	2.07595e-06	1.64051e-05	462.461	0.588303	1.50348	0.00494592	0.0129598
BBIP1	197.486	83.2857	289.528	156.847	62.7503	185.304	171.537	32.0301	334.282	168.117	-0.620263	0.650552	0.0708024	0.162755	168.117	-2.18055	0.220592	6.54813e-10	4.34911e-09
BBOX1-AS1	15.2499	3.14286	49.3083	20.9129	0.936572	13.7726	6.8615	9.52247	20.0856	15.5325	-0.95202	0.516908	0.30118	0.468227	15.5325	-2.60913	0.163898	0.00709567	0.0179217
BBS1	116.662	112.357	116.317	149.004	115.198	91.3998	155.241	129.852	93.2546	119.921	0.482107	1.39678	0.101536	0.214551	119.921	0.247009	1.18674	0.40396	0.519278
BBS10	22.1124	22	92.2949	24.3984	14.9851	76.3752	36.8806	12.9852	7.17343	34.3561	-1.08039	0.472902	0.13994	0.272575	34.3561	-1.81611	0.283986	0.0144102	0.0335289
BBS12	16.7749	12.5714	70.8016	17.4274	8.42914	15.0246	25.7306	18.1793	1.43469	20.7082	-0.546429	0.684713	0.564642	0.709253	20.7082	-1.15796	0.448146	0.226576	0.331675
BBS2	110.562	45.5714	15.1718	94.9793	34.6531	80.1313	108.069	106.479	51.6487	71.9183	1.09383	2.13439	0.0503652	0.124737	71.9183	0.345797	1.27085	0.538812	0.645735
BBS4	537.56	421.928	654.915	453.112	407.409	340.558	413.405	322.033	575.309	458.47	-0.161032	0.894385	0.501686	0.657076	458.47	-0.447558	0.733283	0.0626114	0.117352
BBS5	8.38745	2.35714	0	5.22822	0	20.0328	12.8653	3.46272	22.955	8.36541	-0.696418	0.617102	0.603778	0.73949	8.36541	-2.86944	0.13684	0.0445787	0.088549
BBS7	197.486	128.071	316.079	135.062	166.71	391.892	175.826	180.927	529.399	246.828	-1.28118	0.411459	1.61962e-06	1.30754e-05	246.828	-1.3791	0.384458	2.62162e-07	1.34727e-06
BBS9	70.1496	71.5	227.577	40.083	73.0526	66.3588	57.4651	46.7467	30.1284	75.8956	-0.951574	0.517068	0.103476	0.21777	75.8956	-0.7626	0.589433	0.191338	0.29054
BBX	469.697	1000.21	724.452	711.909	1165.1	614.758	647.554	1344.4	714.474	821.395	-0.167563	0.890345	0.368674	0.539735	821.395	0.773185	1.70904	2.9903e-05	0.000117673
BCAM	180.712	172.857	163.097	278.838	246.318	249.158	247.014	139.374	166.424	204.866	0.286262	1.21948	0.341298	0.511403	204.866	-0.053217	0.963785	0.860169	0.906089
BCAN	109.799	175.214	121.374	149.876	129.247	141.482	136.372	150.628	126.252	137.805	0.0239729	1.01676	0.932388	0.963136	137.805	0.226945	1.17035	0.420634	0.535356
BCAP29	160.887	110	252.863	236.141	124.564	356.835	199.841	212.091	434.71	231.992	-0.807081	0.571537	0.00817415	0.0280576	231.992	-1.22503	0.427788	6.59528e-05	0.000245895
BCAP31	3261.19	3697.57	5009.21	3419.25	5083.71	5701.85	2778.05	4055.71	5318.38	4258.33	-0.761028	0.590076	2.81748e-08	2.98156e-07	4258.33	-0.32063	0.80072	0.0191823	0.0430653
BCAR1	1714.09	2198.43	943.178	1733.15	1848.79	1252.05	1632.18	1815.33	906.722	1560.44	0.710843	1.63676	2.00718e-06	1.59382e-05	1560.44	0.917908	1.88937	8.15804e-10	5.36207e-09
BCAR3	150.212	146.929	49.3083	123.734	122.691	66.3588	120.934	215.554	106.167	122.432	0.83736	1.78678	0.0212901	0.0621986	122.432	1.13419	2.19495	0.0017654	0.00508618
BCAS1	1.52499	11.7857	11.3788	0	0.936572	0	0	2.59704	0	3.1359	-2.86683	0.137087	0.242121	0.402245	3.1359	0.427973	1.34534	0.84853	0.897946
BCAS2	945.495	440	2134.16	772.034	472.969	2345.09	814.803	427.646	2394.49	1194.08	-1.43994	0.368582	1.27385e-27	8.8019e-26	1194.08	-2.3585	0.194994	1.15161e-68	1.37233e-66
BCAS3	97.5995	99.7857	59.4228	120.249	181.695	23.789	104.638	128.986	21.5203	93.0761	1.61673	3.06679	0.000219688	0.00116616	93.0761	1.96384	3.90098	6.79022e-06	2.93701e-05
BCAS4	992.007	713.428	1483.04	903.61	754.877	1232.02	782.211	599.05	1450.47	990.079	-0.636929	0.64308	3.86299e-05	0.000243678	990.079	-1.01069	0.49631	8.01218e-11	5.75373e-10
BCAT1	1162.04	3013.21	1040.53	1213.82	2430.4	1322.17	1188.75	2629.07	1329.95	1703.33	-0.0506274	0.965516	0.71537	0.822538	1703.33	1.12897	2.18702	2.66606e-16	2.9684e-15
BCAT2	1008.78	947.571	1433.73	806.017	918.777	1161.9	741.9	917.62	1084.62	1002.33	-0.525372	0.69478	0.00116053	0.00516345	1002.33	-0.402993	0.756288	0.0126595	0.0299633
BCCIP	2401.86	1981.57	4141.89	2343.98	2022.99	3915.17	2444.41	1850.82	3761.75	2762.72	-0.717084	0.608326	8.0734e-13	1.4985e-11	2762.72	-1.01342	0.49537	6.40144e-24	1.16451e-22
BCDIN3D	25.1624	1.57143	11.3788	22.6556	23.4143	26.2931	30.0191	1.73136	2.86937	16.1217	0.934959	1.91184	0.378599	0.549374	16.1217	-0.619388	0.650947	0.567409	0.672362
BCDIN3D-AS1	0	0	2.52863	4.35685	2.80971	3.75616	1.71537	0.865679	8.60812	2.73784	-1.29925	0.406338	0.502103	0.657318	2.73784	-2.03631	0.243786	0.305947	0.418926
BCHE	15.2499	0	1.26431	16.556	0	1.25205	17.1537	12.1195	0	7.06617	4.25144	19.0463	0.0195192	0.0579934	7.06617	2.23661	4.71288	0.226952	0.332138
BCKDHA	906.608	907.5	792.725	656.141	1181.95	955.316	699.873	824.992	929.677	872.754	-0.242317	0.845387	0.187324	0.333789	872.754	0.121928	1.08819	0.50611	0.617111
BCKDHB	252.386	127.286	199.762	177.759	132.057	297.988	247.872	219.017	242.462	210.732	-0.126294	0.916182	0.664347	0.784733	210.732	-0.630221	0.646078	0.0315497	0.0659508
BCKDK	2080.85	1551	1899	1925.73	2151.3	1175.68	1746.25	1714.91	1539.42	1753.79	0.318355	1.24691	0.0735816	0.167388	1753.79	0.231253	1.17385	0.193929	0.293472
BCL10	51.0872	55	51.8369	73.1951	35.5897	121.449	70.3304	41.5526	71.7343	63.5306	-0.33456	0.793026	0.450457	0.613836	63.5306	-0.889412	0.539834	0.0473896	0.0932092
BCL11A	827.308	480.857	185.854	944.565	467.349	325.534	1361.15	590.393	258.244	604.584	2.02499	4.0699	9.73002e-18	2.96315e-16	604.584	0.999311	1.99904	2.5589e-05	0.000101817
BCL11B	135.724	110.786	5.05726	145.519	157.344	20.0328	277.033	94.3591	5.73875	105.733	4.16273	17.9105	1.0045e-15	2.58512e-14	105.733	3.53931	11.6262	1.04022e-11	8.06147e-11
BCL2	16.7749	12.5714	16.4361	4.35685	17.7949	13.7726	6.8615	11.2538	2.86937	11.4102	-0.242305	0.845394	0.804613	0.88457	11.4102	0.322101	1.25015	0.739867	0.817023
BCL2L1	199.011	372.428	164.361	217.842	350.278	131.465	205.845	386.959	107.601	237.31	0.623083	1.54016	0.007363	0.025708	237.31	1.45706	2.74548	2.36962e-10	1.64147e-09
BCL2L11	82.3496	75.4286	109.995	75.8092	153.598	102.668	86.6264	120.329	34.4325	93.4708	-0.017567	0.987897	0.968395	0.984438	93.4708	0.493991	1.40834	0.262865	0.372015
BCL2L12	3478.51	1886.5	3438.93	2980.96	2089.49	3366.77	2941.87	1701.93	3339.95	2802.77	-0.109785	0.926726	0.356219	0.527227	2802.77	-0.837644	0.559557	2.44188e-12	2.01085e-11
BCL2L13	436.148	439.214	355.272	429.585	446.745	515.846	428.844	402.541	401.712	428.434	0.0239758	1.01676	0.897904	0.943456	428.434	0.017093	1.01192	0.927175	0.955201
BCL2L14	2.28749	2.35714	18.9647	0	0	1.25205	6.8615	1.73136	1.43469	3.87655	-1.24689	0.421354	0.499586	0.655106	3.87655	-2.39261	0.190438	0.210812	0.31351
BCL2L2	154.787	117.071	39.1937	163.817	97.4034	71.367	118.361	148.897	11.4775	102.486	1.83148	3.55901	0.00010417	0.000593359	102.486	1.56561	2.96002	0.000932892	0.00283523
BCL3	25.9249	16.5	6.32157	20.0415	5.61943	3.75616	26.5883	18.1793	1.43469	13.8184	2.64011	6.23377	0.00517958	0.0190769	13.8184	1.79546	3.47126	0.0601537	0.11347
BCL6	12.9624	10.2143	0	15.6847	14.9851	33.8054	17.1537	23.3733	4.30406	14.7203	0.259025	1.19667	0.8126	0.889359	14.7203	0.343488	1.26882	0.753156	0.82652
BCL6B	80.8246	115.5	102.409	104.564	132.993	113.937	66.0419	99.5531	34.4325	94.4729	-0.000926222	0.999358	0.998282	1	94.4729	0.468144	1.38333	0.274303	0.384169
BCL7A	239.424	401.5	109.995	233.527	427.077	91.3998	305.337	360.988	98.9934	252.027	1.37306	2.59019	3.94096e-09	4.73751e-08	252.027	1.98528	3.9594	1.05628e-17	1.30019e-16
BCL7B	619.147	440.786	562.62	575.975	632.186	888.957	658.704	460.541	549.485	598.711	-0.110949	0.925979	0.60953	0.743433	598.711	-0.385408	0.765562	0.0767732	0.139016
BCL7C	2315.7	1935.21	3339.05	2032.03	2113.84	3857.57	2043.87	1844.76	3436.07	2546.46	-0.73414	0.601176	3.05255e-10	4.22909e-09	2546.46	-0.851484	0.554215	3.02537e-13	2.67341e-12
BCL9	213.499	330.786	177.004	249.212	221.031	50.0821	265.025	253.644	63.1262	202.601	1.32373	2.50313	0.000585728	0.00281893	202.601	1.47091	2.77197	0.00013221	0.000469081
BCL9L	468.935	701.643	183.326	615.187	580.674	128.961	578.939	866.545	248.201	485.823	1.57211	2.97339	1.05413e-10	1.53817e-09	485.823	1.94239	3.84342	1.30556e-15	1.37893e-14
BCLAF1	523.835	810.071	763.646	537.635	608.772	626.026	593.52	798.156	672.868	659.392	-0.317874	0.802251	0.0610431	0.145318	659.392	0.104751	1.07531	0.535377	0.642836
BCO1	0	0	0	4.35685	0	0	6.8615	0	0	1.24648	6.27131	77.2418	0.142763	0.276042	1.24648	0	1	1	1
BCO2	2.28749	0.785714	1.26431	6.97096	0	1.25205	0	0	0	1.39561	1.86305	3.63776	0.514348	0.667123	1.39561	-1.64437	0.319886	0.606273	0.705552
BCOR	452.923	872.928	241.484	608.216	746.448	150.246	593.52	946.188	265.417	541.93	1.33405	2.5211	2.2688e-09	2.81588e-08	541.93	1.96746	3.91078	9.07269e-19	1.21203e-17
BCORL1	100.649	214.5	31.6079	147.261	143.295	31.3013	139.803	167.942	30.1284	111.832	2.05723	4.16187	6.7514e-09	7.87424e-08	111.832	2.49895	5.65273	1.53584e-12	1.28468e-11
BCR	1332.08	2529.21	720.659	1381.99	2166.29	492.057	1294.25	2784.02	662.825	1484.82	1.0962	2.13791	5.31563e-12	8.87468e-11	1484.82	1.99628	3.9897	1.91572e-36	6.66046e-35
BCRP3	0	0.785714	0	0.87137	3.74629	12.5205	1.71537	0	1.43469	2.34155	-2.44767	0.183307	0.303937	0.471665	2.34155	-1.63776	0.321356	0.480725	0.593836
BCS1L	312.623	308.786	383.087	322.407	430.823	335.55	256.449	296.928	540.877	354.17	-0.49703	0.708564	0.0382714	0.100443	354.17	-0.280562	0.82327	0.241335	0.348645
BDH1	557.384	348.071	582.849	471.411	388.677	560.919	451.144	420.72	519.356	477.837	-0.168187	0.88996	0.326657	0.496568	477.837	-0.52385	0.695513	0.00240249	0.00672608
BDH2	501.722	385.786	565.148	401.701	442.062	563.424	449.428	368.779	436.145	457.133	-0.210417	0.864287	0.257017	0.419809	457.133	-0.388479	0.763935	0.0369875	0.0754009
BDKRB2	9.14995	38.5	1.26431	13.0705	18.7314	28.7972	15.4384	16.4479	2.86937	16.0299	0.18391	1.13596	0.856034	0.918236	16.0299	1.15539	2.22744	0.249344	0.357557
BDNF	244.761	126.5	192.176	357.262	220.094	130.213	276.175	169.673	219.507	215.151	0.697671	1.62188	0.0175713	0.0532298	215.151	-0.0700909	0.952578	0.81305	0.871958
BDNF-AS	2.28749	1.57143	32.8722	3.48548	3.74629	0	6.8615	0	0	5.64715	-1.38435	0.383063	0.448861	0.612422	5.64715	-2.63958	0.160475	0.16087	0.252747
BDP1	326.348	483.214	744.681	514.108	562.88	333.046	423.698	570.483	543.746	500.245	-0.359602	0.77938	0.168544	0.310069	500.245	-0.00446994	0.996906	0.986319	0.995337
BEAN1	0	0.785714	0	0	0	0	0	6.05976	0	0.760608	0	1	1	1	0.760608	5.56068	47.1988	0.225793	0.330617
BECN1	578.734	201.143	337.572	489.71	408.345	222.865	426.271	237.196	361.541	362.597	0.698244	1.62253	0.0125412	0.0399535	362.597	-0.123654	0.91786	0.660361	0.751636
BEGAIN	38.1248	41.6428	72.0659	43.5685	30.9069	26.2931	34.3075	65.7916	96.124	49.8695	-0.742548	0.597683	0.170867	0.313396	49.8695	-0.487506	0.713257	0.367037	0.48299
BEND3	468.935	664.714	118.846	589.917	742.701	217.857	496.601	794.694	271.156	485.047	1.35815	2.56356	4.36806e-08	4.48394e-07	485.047	1.85981	3.6296	5.65614e-14	5.28796e-13
BEND3P3	0.762496	22	1.26431	0.87137	9.36572	0	3.43075	0	0	4.18829	1.96492	3.90391	0.400954	0.569654	4.18829	4.60249	24.2933	0.0433111	0.0863335
BEND4	228.749	312.714	92.2949	173.403	229.46	43.8218	289.041	322.898	126.252	202.07	1.40238	2.64338	5.54538e-05	0.000336757	202.07	1.72649	3.30921	6.63316e-07	3.26887e-06
BEND5	279.073	270.286	384.352	217.842	299.703	294.232	245.299	331.555	487.793	312.237	-0.649957	0.637299	0.00508775	0.0187982	312.237	-0.370421	0.773557	0.109249	0.185235
BEND6	25.9249	14.1429	67.0087	20.9129	67.4332	18.7808	19.7268	4.3284	32.9978	30.1396	-0.83536	0.560443	0.317688	0.486887	30.1396	-0.472713	0.720608	0.570398	0.674979
BEND7	37.3623	32.2143	25.2863	34.8548	21.5411	11.2685	49.7459	29.4331	25.8244	29.7256	0.971019	1.96022	0.0973423	0.207934	29.7256	0.42144	1.33926	0.476498	0.589692
BEST1	0.762496	3.14286	0	6.09959	4.68286	7.51231	5.14612	0.865679	1.43469	3.29407	0.412544	1.33103	0.815326	0.891254	3.29407	-0.051746	0.964768	0.976859	0.988764
BEST2	29.7373	25.1429	40.4581	39.2116	80.5452	41.3177	36.0229	33.7615	54.5181	42.3017	-0.376063	0.770537	0.495189	0.651627	42.3017	0.0303413	1.02125	0.955854	0.975368
BEST4	76.2496	24.3571	77.1232	67.9668	36.5263	37.5616	76.3342	58.8662	57.3875	56.9303	0.358513	1.2821	0.445386	0.609349	56.9303	-0.524658	0.695124	0.271734	0.381383
BET1	166.224	88	504.461	186.473	80.5452	454.495	157.814	135.912	312.762	231.854	-1.31792	0.401113	1.39832e-06	1.14121e-05	231.854	-2.06314	0.239294	1.08659e-13	9.98825e-13
BET1L	452.16	352	308.493	412.158	533.846	423.194	357.656	414.66	361.541	401.745	0.160861	1.11795	0.458487	0.620191	401.745	0.249299	1.18863	0.250428	0.358674
BEX1	2470.49	1118.86	3642.49	2124.4	1166.97	3311.68	2318.33	1072.58	3939.65	2351.71	-0.655699	0.634768	1.68029e-08	1.85358e-07	2351.71	-1.69758	0.308303	2.31051e-47	1.28366e-45
BEX2	871.533	417.214	1453.96	729.336	423.33	1677.75	827.668	493.437	1437.56	925.754	-0.911763	0.531535	3.18292e-10	4.39353e-09	925.754	-1.77656	0.291879	1.44093e-33	4.39631e-32
BEX4	723.609	323.714	778.818	625.643	248.191	762.5	687.865	148.897	898.114	577.483	-0.259591	0.835324	0.258215	0.42115	577.483	-1.7573	0.2958	4.7927e-14	4.50892e-13
BEX5	1.52499	2.35714	13.9075	4.35685	1.87314	32.5534	7.71919	0	1.43469	7.30298	-1.82516	0.282209	0.174343	0.317799	7.30298	-3.49884	0.0884597	0.0157537	0.0362893
BFAR	776.221	810.857	686.523	873.984	718.35	1173.17	765.915	955.71	836.422	844.128	-0.158586	0.895903	0.420668	0.587108	844.128	-0.11782	0.921579	0.549702	0.655938
BFSP1	53.3747	5.5	72.0659	28.7552	22.4777	23.789	64.3266	51.0751	51.6487	41.4459	-0.00946601	0.99346	0.98924	0.996561	41.4459	-0.902127	0.535097	0.203642	0.304944
BGLAP	1.52499	3.92857	0	0.87137	3.74629	16.2767	3.43075	0	0	3.30874	-1.48838	0.356413	0.482435	0.640896	3.30874	-1.08943	0.469947	0.604623	0.70428
BGN	62.5247	134.357	12.6431	54.8963	122.691	31.3013	65.1842	228.539	22.955	81.6769	1.44889	2.72998	0.00128279	0.00565561	81.6769	2.85973	7.25879	1.1372e-10	8.07134e-10
BHLHA15	6.09997	5.5	0	6.09959	7.49257	1.25205	4.28844	5.19408	0	3.99185	3.67124	12.7396	0.0657097	0.153647	3.99185	3.81081	14.0335	0.0559021	0.106889
BHLHB9	70.1496	76.2143	80.9161	64.4814	50.5749	62.6026	70.3304	67.523	107.601	72.266	-0.290024	0.817889	0.44714	0.610631	72.266	-0.365119	0.776405	0.339864	0.455246
BHLHE40	4.57498	22.7857	12.6431	10.4564	1.87314	0	2.57306	24.239	0	8.79394	0.46542	1.38072	0.755057	0.85164	8.79394	1.94291	3.84479	0.186578	0.285103
BHLHE40-AS1	2.28749	0	0	6.09959	0	0	0.857687	0	0	1.0272	5.9929	63.6858	0.147926	0.283658	1.0272	0	1	1	1
BHLHE41	9.91245	7.85714	8.8502	4.35685	11.2389	0	10.2922	8.65679	25.8244	9.66543	-0.486679	0.713666	0.679622	0.796589	9.66543	-0.313448	0.804716	0.789843	0.854594
BHMG1	2.28749	0	10.1145	10.4564	7.49257	0	1.71537	0	0	3.56293	0.507925	1.422	0.823246	0.896168	3.56293	-0.450063	0.732011	0.844896	0.895078
BHMT	21.3499	29.8571	97.3522	16.556	45.892	1.25205	17.1537	18.1793	55.9528	33.7272	-1.48781	0.356554	0.0868251	0.190944	33.7272	-0.719089	0.607481	0.404039	0.519299
BICC1	3.04998	1.57143	2.52863	0.87137	46.8286	21.2849	7.71919	9.52247	0	10.3752	-1.04094	0.48601	0.476889	0.635934	10.3752	1.27169	2.41445	0.371402	0.487096
BICD1	95.312	102.929	168.154	75.8092	232.27	138.978	75.4765	118.598	37.3018	116.092	-0.484452	0.714769	0.310234	0.478503	116.092	0.393583	1.31365	0.40656	0.521763
BICD2	193.674	489.5	168.154	255.311	483.271	62.6026	243.583	513.348	104.732	279.353	1.04477	2.06304	0.000429582	0.002133	279.353	2.14689	4.42873	3.1165e-13	2.75099e-12
BID	3663.03	2546.5	4450.39	3416.64	3303.29	5068.31	3256.64	2425.63	4665.6	3644	-0.45653	0.728737	0.000555631	0.00268588	3644	-0.777692	0.583299	4.28623e-09	2.63503e-08
BIK	51.0872	9.42857	10.1145	37.4689	19.668	47.578	35.1652	16.4479	44.4753	30.1593	0.279154	1.21348	0.670792	0.789237	30.1593	-1.16835	0.444929	0.0838911	0.149468
BIN1	979.045	1008.07	586.642	997.718	1083.61	1039.2	859.403	767.858	494.967	868.502	0.418405	1.33645	0.0755149	0.170958	868.502	0.430149	1.34737	0.0677138	0.125132
BIN3	761.733	550.786	474.118	714.523	432.696	552.155	596.95	691.678	582.483	595.236	0.36659	1.2893	0.0653319	0.152981	595.236	0.0592433	1.04192	0.766507	0.836444
BIN3-IT1	0	0	0	0	2.80971	0	0	12.9852	0	1.75499	0	1	1	1	1.75499	6.76587	108.826	0.0859728	0.152615
BIRC2	131.912	102.143	121.374	122.863	104.896	147.742	154.384	65.7916	190.813	126.88	-0.167044	0.890666	0.597009	0.733723	126.88	-0.751667	0.593917	0.0186967	0.0421073
BIRC5	3960.4	3146	4213.96	3424.48	3386.64	4102.98	3322.68	3358.84	3547.98	3607.11	-0.148141	0.902412	0.201272	0.352494	3607.11	-0.262752	0.833496	0.023517	0.0512982
BIRC6	344.648	767.643	262.977	386.888	716.477	155.254	436.563	827.59	233.854	459.099	0.841634	1.79208	8.22152e-05	0.000479443	459.099	1.82696	3.54789	7.01823e-18	8.77012e-17
BISPR	5.33747	4.71428	6.32157	10.4564	4.68286	16.2767	3.43075	0.865679	2.86937	6.10612	-0.413495	0.750802	0.740332	0.841438	6.10612	-1.31678	0.40143	0.304048	0.416673
BIVM	49.5622	25.9286	11.3788	81.9087	37.4629	80.1313	45.4574	26.8361	41.6059	44.4747	0.409075	1.32783	0.509163	0.66275	44.4747	-0.56343	0.676691	0.369474	0.485148
BLACAT1	60.9997	90.3571	55.6298	62.7386	68.3697	15.0246	69.4727	91.762	35.8672	61.1357	0.85948	1.81438	0.0733141	0.166941	61.1357	1.23502	2.35384	0.00978367	0.0238359
BLCAP	661.084	505.214	404.581	666.598	452.364	234.134	626.112	451.885	278.329	475.589	1.09065	2.1297	1.36917e-07	1.29776e-06	475.589	0.619786	1.53665	0.00287377	0.00791477
BLM	324.823	474.571	532.276	317.179	355.897	401.909	300.191	583.468	294.111	398.269	-0.383721	0.766458	0.119461	0.242386	398.269	0.202219	1.15047	0.409716	0.52479
BLMH	648.884	737.786	584.113	713.652	871.012	831.363	564.358	766.992	925.373	738.17	-0.280033	0.823572	0.136792	0.268122	738.17	0.0218097	1.01523	0.907566	0.940627
BLOC1S1	1492.97	851.714	2317.49	1234.73	994.639	2890.99	1292.53	876.068	2809.12	1640.03	-0.995477	0.50157	5.29971e-13	1.00177e-11	1640.03	-1.55862	0.339476	2.81904e-29	7.06694e-28
BLOC1S2	982.095	277.357	1581.66	1006.43	436.442	1509.98	1000.06	276.152	1142.01	912.465	-0.502888	0.705693	0.00882452	0.0298907	912.465	-2.09873	0.233464	5.90717e-27	1.28327e-25
BLOC1S3	36.5998	23.5714	22.7577	42.6971	61.8137	16.2767	33.4498	29.4331	11.4775	30.8974	1.15321	2.22408	0.0627228	0.148307	30.8974	1.17595	2.25941	0.0578278	0.109863
BLOC1S4	1541	727.571	1022.83	740.664	640.615	1096.8	1482.94	837.978	1017.19	1011.95	0.26342	1.20032	0.242296	0.402399	1011.95	-0.507681	0.703352	0.0247258	0.0536007
BLOC1S6	305.761	292.286	327.457	352.033	257.557	280.46	345.648	360.123	249.635	307.884	0.22522	1.16896	0.293783	0.459727	307.884	0.0849204	1.06063	0.692999	0.77775
BLVRA	1193.31	821.857	1356.61	963.735	935.635	1150.64	918.583	697.738	1374.43	1045.84	-0.335162	0.792695	0.0393388	0.102785	1045.84	-0.660889	0.632489	5.11533e-05	0.000193561
BLVRB	1059.87	1045.79	2292.2	873.112	1293.41	1943.19	839.676	1050.93	1855.05	1361.47	-1.13502	0.455328	7.57435e-14	1.57273e-12	1361.47	-0.845825	0.556392	2.35545e-08	1.34404e-07
BLZF1	15.2499	5.5	54.3655	0.87137	1.87314	45.0739	18.8691	0	67.4303	23.2481	-2.25038	0.210169	0.0141539	0.04431	23.2481	-4.47472	0.0449753	1.04814e-05	4.41853e-05
BMF	266.111	403.857	126.431	282.324	269.733	146.49	270.172	350.6	127.687	249.267	1.03012	2.0422	1.1487e-05	8.05215e-05	249.267	1.35466	2.55737	7.11477e-09	4.27484e-08
BMP1	74.7246	110	50.5726	88.8797	137.676	18.7808	55.7497	77.9111	43.0406	73.0372	0.967147	1.95497	0.0339375	0.0909405	73.0372	1.53638	2.90066	0.000703094	0.00219026
BMP2	67.8621	73.0714	103.674	72.3237	29.0337	20.0328	53.1766	78.7768	40.1712	59.7914	0.237489	1.17894	0.683452	0.799045	59.7914	0.142902	1.10412	0.806454	0.866781
BMP2K	40.4123	51.0714	36.6651	50.5394	57.1309	31.3013	52.3189	55.4035	64.5609	48.8226	0.116985	1.08447	0.799749	0.881789	48.8226	0.309016	1.23886	0.501704	0.61283
BMP4	37.3623	33	58.1585	103.693	19.668	43.8218	90.9149	45.881	67.4303	55.5477	0.453132	1.36901	0.377027	0.547819	55.5477	-0.777965	0.583189	0.137102	0.223277
BMP6	7.62496	22.7857	1.26431	13.0705	35.5897	12.5205	28.3037	30.2988	37.3018	20.9733	-0.0531661	0.963819	0.953775	0.975607	20.9733	0.804059	1.74601	0.376359	0.492224
BMP7	144.112	139.071	96.0879	134.191	88.9743	8.76437	142.376	167.942	58.8221	108.927	1.36291	2.57204	0.010909	0.0355559	108.927	1.2761	2.42183	0.0172334	0.0392961
BMP8A	10.6749	7.07143	8.8502	15.6847	35.5897	0	14.5807	11.2538	7.17343	12.3199	1.35898	2.56504	0.211712	0.365868	12.3199	1.75297	3.37052	0.10588	0.180885
BMP8B	1.52499	1.57143	0	4.35685	2.80971	2.5041	5.14612	0.865679	1.43469	2.24595	1.4825	2.79432	0.443858	0.608169	2.24595	0.408767	1.32755	0.836736	0.889357
BMPR1A	102.937	129.643	60.6871	89.7511	87.1012	42.5698	107.211	124.658	113.34	95.322	0.475308	1.39022	0.234221	0.392979	95.322	0.663189	1.58358	0.0964301	0.167585
BMPR1B	6.09997	22	16.4361	17.4274	0.936572	0	7.71919	7.79111	0	8.71226	0.917527	1.88887	0.544919	0.692305	8.71226	0.899426	1.86532	0.553129	0.659098
BMPR2	77.7746	95.0714	73.3302	97.5934	118.945	62.6026	129.511	153.225	74.6037	98.073	0.53381	1.44775	0.134257	0.264381	98.073	0.802768	1.74444	0.0238823	0.0519779
BMS1	897.458	1701.07	1204.89	756.349	1448.88	842.631	850.826	1686.34	847.9	1137.37	-0.2094	0.864897	0.208691	0.361826	1137.37	0.739835	1.66999	7.91471e-06	3.39305e-05
BMS1P20	56.4247	61.2857	127.696	60.9959	78.672	76.3752	60.8958	77.9111	96.124	77.3756	-0.752089	0.593743	0.038813	0.101702	77.3756	-0.463932	0.725007	0.199998	0.300802
BMS1P4	15.2499	2.35714	13.9075	4.35685	6.556	15.0246	3.43075	0.865679	8.60812	7.81739	-0.70005	0.615551	0.537989	0.686789	7.81739	-1.95568	0.257799	0.0986553	0.170831
BMS1P5	6.86246	1.57143	6.32157	2.61411	0.936572	1.25205	1.71537	1.73136	4.30406	3.03433	-0.0780359	0.947347	0.960527	0.980065	3.03433	-1.47962	0.358582	0.372585	0.488181
BMS1P6	4.57498	2.35714	6.32157	1.74274	6.556	3.75616	4.28844	0	17.2162	5.20147	-1.35473	0.391009	0.345428	0.5159	5.20147	-1.61912	0.325534	0.264079	0.372995
BNC1	5.33747	0	0	0	0	0	0.857687	0	0	0.688351	5.41985	42.8092	0.237938	0.397368	0.688351	0	1	1	1
BNC2	247.049	349.643	168.154	228.299	330.61	160.263	305.337	451.019	251.07	276.827	0.432596	1.34966	0.0864148	0.190287	276.827	0.967948	1.95606	0.000115464	0.000413414
BNIP1	225.699	69.9286	499.404	214.357	150.788	296.736	186.118	179.196	341.455	240.409	-0.861369	0.55043	0.00747511	0.026022	240.409	-1.51069	0.350943	3.27845e-06	1.47005e-05
BNIP2	199.011	183.071	433.66	262.282	109.579	354.331	195.553	199.106	357.237	254.87	-0.802763	0.57325	0.00223529	0.00923601	254.87	-1.21801	0.429876	4.13117e-06	1.82676e-05
BNIP3	655.746	443.928	600.549	704.067	578.801	847.639	838.818	391.287	1008.58	674.38	-0.159662	0.895235	0.455878	0.618232	674.38	-0.79691	0.57558	0.000213696	0.000732894
BNIP3L	311.098	200.357	600.549	339.834	182.631	514.593	282.179	223.345	565.266	357.762	-0.848679	0.555293	4.82025e-06	3.59823e-05	357.762	-1.47	0.360982	6.39739e-15	6.43456e-14
BNIPL	3.81248	0.785714	5.05726	4.35685	2.80971	0	5.14612	55.4035	1.43469	8.75626	1.03057	2.04283	0.511638	0.665211	8.75626	3.17879	9.05547	0.0387902	0.078581
BOC	112.087	86.4286	35.4008	128.091	190.124	247.906	124.365	125.524	83.2118	125.904	-0.00930911	0.993568	0.985684	0.994819	125.904	0.131151	1.09517	0.800331	0.862085
BOD1	1327.51	913.785	2153.13	1185.06	930.952	2084.67	1083.26	739.29	1941.13	1373.2	-0.7809	0.582004	2.02638e-08	2.19814e-07	1373.2	-1.25793	0.418143	2.53904e-19	3.54453e-18
BOD1L1	414.035	652.143	701.694	563.776	767.052	527.114	563.501	936.665	517.922	627.1	-0.181598	0.881726	0.374481	0.545282	627.1	0.43087	1.34805	0.0343191	0.070907
BOK	1518.89	1872.36	1599.36	1387.22	1740.15	1499.96	1241.07	1569.48	1348.61	1530.79	-0.101126	0.932305	0.452958	0.615639	1530.79	0.220128	1.16484	0.101669	0.175
BOLA1	366.761	170.5	438.717	298.88	241.635	482.04	298.475	235.465	550.92	342.599	-0.608876	0.655707	0.00405907	0.0155489	342.599	-1.18532	0.439726	3.13342e-08	1.7647e-07
BOLA3	1258.88	549.214	2763.79	1143.24	542.275	3244.07	1188.75	522.005	2991.32	1578.17	-1.32526	0.399077	1.23501e-29	9.71759e-28	1578.17	-2.47954	0.179302	4.95679e-95	1.43008e-92
BOLA3-AS1	125.049	124.929	74.5945	96.722	149.851	159.011	114.93	110.807	192.248	127.571	-0.336181	0.792136	0.349932	0.520781	127.571	-0.141757	0.906414	0.692941	0.777737
BOP1	3525.78	5947.86	3342.85	2988.8	6287.21	3572.11	2774.62	4484.22	2992.76	3990.69	-0.0930184	0.937559	0.525767	0.676492	3990.69	0.75471	1.68729	2.50486e-07	1.28968e-06
BORA	53.3747	23.5714	80.9161	44.4399	32.78	117.693	36.8806	13.8509	124.818	58.7027	-1.26158	0.417086	0.00454346	0.0171134	58.7027	-2.20645	0.216666	1.51022e-06	7.09792e-06
BPGM	259.249	106.071	317.343	323.278	72.116	436.966	265.025	199.106	189.379	240.948	-0.156385	0.897271	0.661658	0.783141	240.948	-1.32312	0.399671	0.000248458	0.000842278
BPHL	799.858	682.786	1378.1	720.623	781.101	962.828	670.712	651.857	1106.14	861.557	-0.653444	0.635761	9.3553e-05	0.000538118	861.557	-0.70464	0.613596	2.57294e-05	0.000102302
BPIFB3	0	0	0	0	0	23.789	0	0	0	2.64322	-8.02408	0.00384159	0.0399577	0.104063	2.64322	-7.97064	0.00398656	0.0413046	0.0829269
BPNT1	54.1372	77	84.7091	31.3693	56.1943	88.8957	58.3227	33.7615	83.2118	63.0668	-0.8354	0.560427	0.0606823	0.144689	63.0668	-0.619641	0.650833	0.162772	0.255394
BPTF	1485.34	2589.71	1844.63	1872.57	2344.24	1367.24	2175.1	2973.61	1799.1	2050.17	0.142947	1.10416	0.393413	0.562922	2050.17	0.658418	1.57835	8.25077e-05	0.000302528
BRAF	48.7997	58.9286	41.7224	31.3693	87.1012	77.6272	61.7535	36.3585	7.17343	50.0926	0.160611	1.11776	0.807738	0.886377	50.0926	0.521409	1.43536	0.428292	0.542624
BRAP	288.223	192.5	257.92	211.743	331.546	583.456	230.718	282.211	417.494	310.646	-0.784319	0.580626	0.00850959	0.0290092	310.646	-0.644018	0.639928	0.0306071	0.064291
BRAT1	1056.06	1552.57	989.958	1017.76	1501.32	1214.49	813.945	1284.67	941.154	1152.44	-0.123631	0.917875	0.436971	0.602094	1152.44	0.46346	1.37884	0.00344844	0.00932876
BRCA1	390.398	571.214	585.377	481.867	634.996	469.52	491.455	595.587	616.915	537.481	-0.293785	0.815759	0.0964976	0.206614	537.481	0.108493	1.0781	0.537578	0.644776
BRCA2	145.637	443.143	422.281	222.199	232.27	339.306	212.706	270.092	193.683	275.702	-0.720716	0.606796	0.0253399	0.0717011	275.702	-0.01512	0.989574	0.962386	0.979741
BRCAT54	10.6749	11.7857	11.3788	1.74274	12.1754	17.5287	14.5807	6.92544	28.6937	12.8318	-1.08735	0.470624	0.243323	0.403779	12.8318	-0.895729	0.537475	0.334881	0.450222
BRCC3	325.586	201.143	338.836	448.755	242.572	323.029	433.132	186.121	344.325	315.944	0.26254	1.19959	0.212278	0.366615	315.944	-0.67663	0.625625	0.00155409	0.0045354
BRD1	171.562	243.571	98.6165	164.689	153.598	97.6601	150.953	211.226	196.552	165.381	0.314893	1.24392	0.336533	0.507239	165.381	0.636236	1.55427	0.0515108	0.0997642
BRD2	1636.32	1496.79	952.029	1850.79	1240.96	577.196	1736.82	1538.31	1199.4	1358.73	0.937893	1.91573	5.71527e-06	4.22037e-05	1358.73	0.649246	1.56835	0.00170575	0.0049273
BRD3	2345.44	2841.14	938.121	2236.81	2396.69	1009.15	2634.82	2663.7	978.456	2004.92	1.30259	2.46672	2.02036e-26	1.26812e-24	2004.92	1.43356	2.70113	1.12548e-31	3.14771e-30
BRD4	4105.28	5613.14	1550.05	4838.72	4418.74	1491.19	6733.7	6156.71	1710.15	4068.63	1.72241	3.29986	2.56529e-23	1.22992e-21	4068.63	1.76882	3.40776	1.67653e-24	3.17632e-23
BRD7	706.834	418.786	393.202	474.025	291.274	532.122	1474.36	418.989	522.226	581.313	0.875297	1.83439	0.00505957	0.0187271	581.313	-0.357876	0.780313	0.254015	0.362422
BRD8	828.071	768.428	747.21	875.727	897.236	721.182	1051.52	894.247	1041.58	869.467	0.135428	1.09842	0.444478	0.608635	869.467	0.0292141	1.02046	0.869138	0.912065
BRD9	1205.51	2263.64	702.959	1116.22	1662.41	792.549	1705.94	2358.11	853.638	1406.78	0.778065	1.71483	2.92445e-05	0.00018949	1406.78	1.42015	2.67613	2.10605e-14	2.03013e-13
BRE	173.849	152.429	166.889	218.714	96.4669	326.786	167.249	118.598	411.755	203.637	-0.692692	0.618698	0.0336706	0.0903283	203.637	-1.2979	0.406716	7.92415e-05	0.000291462
BREA2	6.86246	11	16.4361	3.48548	7.49257	6.26026	3.43075	18.1793	14.3469	9.72153	-1.41776	0.374293	0.153396	0.29079	9.72153	-0.0114221	0.992114	0.990449	0.997851
BRE-AS1	4.57498	4.71428	13.9075	0	0	12.5205	0.857687	0	22.955	6.61443	-3.16236	0.111695	0.0472091	0.118564	6.61443	-3.35489	0.0977414	0.0373949	0.0761182
BRF1	394.21	653.714	164.361	426.1	408.345	210.345	455.432	551.438	197.987	384.659	1.1556	2.22776	1.7674e-07	1.6486e-06	384.659	1.49564	2.81988	1.23726e-11	9.50339e-11
BRF2	249.336	215.286	232.634	220.457	263.177	403.161	131.226	155.822	176.466	227.507	-0.435269	0.739556	0.203847	0.355662	227.507	-0.358602	0.77992	0.295076	0.406818
BRI3	115.899	74.6428	113.788	69.7096	52.448	125.205	149.238	66.6573	149.207	101.866	-0.211875	0.863415	0.5583	0.704191	101.866	-0.999663	0.500117	0.00653301	0.0166412
BRI3BP	177.662	118.643	141.603	108.921	99.2766	137.726	326.779	126.389	98.9934	148.444	0.69562	1.61958	0.0649232	0.152154	148.444	-0.136771	0.909553	0.718926	0.79986
BRICD5	36.5998	72.2857	63.2157	38.3403	54.3212	47.578	64.3266	60.5976	101.863	59.9031	-0.608367	0.655939	0.181109	0.326084	59.9031	-0.179191	0.883198	0.691635	0.776701
BRINP1	551.285	568.071	424.81	548.092	615.328	339.306	651.842	649.26	292.676	515.63	0.727031	1.65523	8.77738e-05	0.000508612	515.63	0.792561	1.73215	1.90199e-05	7.7138e-05
BRINP2	58.7122	99	15.1718	70.5809	165.773	133.97	62.6112	69.2544	4.30406	75.4864	0.318497	1.24703	0.671199	0.789595	75.4864	1.11778	2.17012	0.13501	0.220502
BRIP1	41.1748	67.5714	83.4447	48.7967	145.169	35.0575	30.8767	55.4035	117.644	69.4598	-0.963695	0.512742	0.0659956	0.154183	69.4598	0.184344	1.1363	0.721362	0.802082
BRIX1	963.795	422.714	2040.6	1028.22	500.129	1880.58	1037.8	682.155	1711.58	1140.84	-0.894905	0.537783	1.486e-07	1.40042e-06	1140.84	-1.81196	0.284803	5.67772e-26	1.17892e-24
BRK1	1822.37	854.857	3172.16	1708.76	1110.77	3400.57	1433.2	889.918	2942.54	1926.13	-0.938606	0.521737	4.76668e-11	7.2247e-10	1926.13	-1.73728	0.299934	1.15945e-33	3.55732e-32
BRMS1	2249.36	2315.5	3490.77	2383.2	2406.05	3019.95	2065.31	2183.24	3088.88	2578.03	-0.519361	0.697681	4.71317e-06	3.5215e-05	2578.03	-0.475521	0.719207	2.78356e-05	0.000110011
BRMS1L	105.987	58.9286	161.832	134.191	59.004	275.452	118.361	54.5378	139.165	123.051	-0.687374	0.620983	0.0368187	0.097282	123.051	-1.74249	0.298853	2.452e-07	1.26524e-06
BROX	170.799	173.643	159.304	175.145	105.833	265.435	156.099	217.286	196.552	180.011	-0.307799	0.807873	0.322968	0.492508	180.011	-0.32189	0.800021	0.30173	0.414082
BRPF1	474.272	579.857	360.33	529.793	582.548	199.076	482.02	549.706	302.719	451.147	0.786023	1.72431	0.000222544	0.00117904	451.147	0.990434	1.98678	3.19365e-06	1.43418e-05
BRPF3	137.249	235.714	32.8722	205.643	235.079	70.1149	192.122	280.48	55.9528	160.581	1.75067	3.36516	6.95827e-08	6.90995e-07	160.581	2.24141	4.72859	4.16293e-12	3.3575e-11
BRSK1	60.9997	67.5714	31.6079	53.1535	50.5749	33.8054	59.1804	52.8064	80.3424	54.4491	0.257036	1.19502	0.589565	0.728759	54.4491	0.237964	1.17933	0.617875	0.715711
BRSK2	268.399	410.143	225.048	326.764	402.726	148.994	331.067	499.497	253.939	318.509	0.562272	1.47659	0.017593	0.0532811	318.509	1.06555	2.09297	6.20706e-06	2.69754e-05
BRWD1	333.973	422.714	326.193	323.278	318.434	470.772	432.274	463.138	215.203	367.331	0.104353	1.07501	0.701316	0.811965	367.331	0.249418	1.18873	0.358972	0.474428
BRWD1-IT2	6.86246	0	10.1145	12.1992	16.8583	20.0328	13.723	0	0	8.86559	0.115573	1.08341	0.943051	0.96928	8.86559	-0.852972	0.553643	0.601796	0.702031
BRWD3	86.162	306.428	145.396	119.378	121.754	194.068	116.645	209.494	121.948	157.919	-0.52047	0.697145	0.144559	0.2785	157.919	0.46716	1.38239	0.185859	0.284215
BSCL2	12.1999	7.07143	16.4361	7.84233	16.8583	6.26026	9.43456	8.65679	18.6509	11.4901	-0.482031	0.715969	0.590985	0.729284	11.4901	-0.344768	0.787435	0.70012	0.78387
BSDC1	401.835	374	271.828	538.506	239.762	575.944	466.582	294.331	152.077	368.318	0.490943	1.40536	0.160623	0.29979	368.318	-0.139899	0.907582	0.690204	0.775559
BSG	21997.2	16411.2	24226.8	23046	23655	29080.2	19513.2	17159.5	26942	22447.9	-0.313918	0.804454	0.0257919	0.0726777	22447.9	-0.487869	0.713078	0.000531697	0.0016942
BSN	68.6246	154	16.4361	79.2946	99.2766	12.5205	89.1995	99.5531	22.955	71.3178	2.2	4.59478	8.23387e-07	6.99411e-06	71.3178	2.77542	6.84675	4.00262e-10	2.71436e-09
BSN-AS2	1.52499	0	0	8.7137	11.2389	0	3.43075	1.73136	1.43469	3.11937	3.31746	9.96911	0.164156	0.304555	3.11937	3.23682	9.42715	0.175124	0.270567
BSND	3.81248	3.14286	0	2.61411	0	0	0.857687	6.05976	1.43469	1.99129	2.40798	5.30731	0.351115	0.521928	1.99129	2.74551	6.70628	0.286198	0.397604
BSPRY	423.185	249.857	359.065	344.191	457.984	239.142	397.967	296.928	242.462	334.531	0.470694	1.38578	0.072828	0.166182	334.531	0.255179	1.19348	0.331854	0.447139
BST1	13.7249	0	3.79294	0.87137	11.2389	0	1.71537	0	0	3.48261	2.09545	4.27358	0.38189	0.552637	3.48261	1.54674	2.92156	0.520626	0.629999
BST2	5871.98	2486.79	5442.87	5444.32	3178.72	6206.42	6000.38	2898.29	5959.69	4832.16	-0.0241129	0.983425	0.836391	0.905679	4832.16	-1.04028	0.486232	7.07533e-19	9.54434e-18
BTAF1	224.174	367.714	393.202	267.51	392.423	580.952	247.014	392.153	416.059	364.578	-0.91356	0.530874	9.68621e-06	6.90163e-05	364.578	-0.271706	0.828339	0.184172	0.281976
BTBD1	205.874	230.214	141.603	289.295	162.963	261.679	253.018	117.732	318.5	220.098	0.0527254	1.03722	0.872663	0.929045	220.098	-0.496007	0.709067	0.133747	0.218875
BTBD10	89.212	69.9286	346.422	141.162	36.5263	105.172	117.503	32.8958	76.0384	112.762	-0.602882	0.658437	0.232425	0.391061	112.762	-1.91922	0.264397	0.000181129	0.000627221
BTBD11	73.1996	208.214	30.3435	113.278	151.725	115.189	93.4879	223.345	67.4303	119.579	0.392847	1.31298	0.352324	0.522968	119.579	1.45322	2.73818	0.000518758	0.00165618
BTBD17	901.27	1095.29	725.716	530.664	1164.16	1188.2	999.206	1209.35	1504.99	1035.43	-0.491174	0.711446	0.0467868	0.117711	1035.43	0.0213766	1.01493	0.930935	0.957306
BTBD2	798.333	1228.07	479.175	773.776	974.034	532.122	686.15	1293.33	669.999	826.11	0.427075	1.3445	0.01472	0.0458495	826.11	1.05748	2.0813	1.32224e-09	8.54727e-09
BTBD3	245.524	405.428	245.277	278.838	291.274	182.8	277.891	320.301	209.464	272.977	0.331072	1.25795	0.143818	0.27756	272.977	0.674739	1.59631	0.00278547	0.00768963
BTBD6	105.224	150.857	75.8589	94.9793	189.187	83.8875	87.4841	153.225	229.55	130.028	-0.431663	0.741407	0.282299	0.447289	130.028	0.34535	1.27046	0.386181	0.501797
BTBD7	271.449	398.357	131.489	399.959	302.513	209.093	412.548	386.093	152.077	295.953	1.13598	2.19767	1.00253e-05	7.12783e-05	295.953	1.1413	2.2058	9.18684e-06	3.9018e-05
BTBD8	0	3.14286	26.5506	3.48548	14.9851	0	6.00381	28.5674	5.73875	9.83045	-1.77787	0.291613	0.226245	0.38333	9.83045	0.528875	1.4428	0.709384	0.791535
BTBD9	56.4247	112.357	31.6079	68.8382	58.0674	10.0164	73.7611	96.9561	30.1284	59.7953	1.47622	2.78219	0.00334823	0.0131811	59.7953	1.90439	3.74351	0.000144903	0.000510483
BTC	0.762496	0	0	2.61411	0	0	2.57306	5.19408	0	1.23819	5.35561	40.9448	0.178675	0.322856	1.23819	5.16159	35.7926	0.195705	0.295616
BTD	281.361	105.286	409.638	275.353	203.236	557.163	180.972	227.674	558.093	310.975	-1.047	0.483974	0.000306507	0.00156878	310.975	-1.50948	0.351238	2.3001e-07	1.18947e-06
BTF3	6667.26	4616.86	15969.6	5355.44	5401.21	15987.5	5060.36	4579.44	15572.1	8801.07	-1.47612	0.359454	1.48204e-33	1.62481e-31	8801.07	-1.70321	0.307103	4.84462e-44	2.39969e-42
BTF3L4	413.273	211.357	524.69	304.979	197.617	544.643	369.663	172.27	555.224	365.968	-0.577556	0.670098	0.00252575	0.0102837	365.968	-1.48217	0.35795	3.0369e-14	2.89854e-13
BTG1	245.524	249.071	192.176	252.697	280.035	214.101	269.314	238.928	347.194	254.338	0.0292295	1.02047	0.908224	0.949567	254.338	0.029957	1.02098	0.906012	0.939668
BTG2	38.8873	8.64286	48.0439	28.7552	17.7949	13.7726	13.723	7.79111	7.17343	20.5094	0.234954	1.17687	0.776932	0.866038	20.5094	-1.02046	0.49296	0.22883	0.334202
BTG3	417.085	198.786	659.972	413.901	312.815	555.911	472.586	179.196	695.823	434.008	-0.552125	0.682015	0.0127183	0.0404158	434.008	-1.4702	0.360932	5.75284e-11	4.17316e-10
BTK	3.81248	8.64286	61.9514	0	9.36572	7.51231	13.723	1.73136	0	11.8599	-1.98923	0.251874	0.174553	0.318028	11.8599	-1.81758	0.283697	0.213946	0.316957
BTN1A1	5.33747	10.2143	1.26431	7.84233	0	0	0.857687	0	8.60812	3.79158	0.52091	1.43486	0.803342	0.884209	3.79158	0.072458	1.05151	0.972528	0.986262
BTN2A1	186.811	194.857	111.26	178.631	239.762	15.0246	246.156	159.285	111.906	160.41	1.36324	2.57262	0.00408804	0.0156489	160.41	1.32073	2.49792	0.00542691	0.0140832
BTN2A2	202.824	134.357	187.119	134.191	147.042	25.041	246.156	194.778	154.946	158.495	0.669083	1.59006	0.170549	0.312918	158.495	0.376412	1.29811	0.44149	0.555706
BTN2A3P	14.4874	14.9286	34.1365	27.0125	15.9217	1.25205	7.71919	15.5822	5.73875	15.1977	0.2543	1.19276	0.801657	0.882974	15.1977	0.170829	1.1257	0.866223	0.910226
BTN3A1	28.9748	12.5714	24.022	38.3403	27.1606	0	35.1652	6.92544	28.6937	22.4282	0.963719	1.95033	0.300718	0.467819	22.4282	-0.174408	0.886131	0.853237	0.901129
BTN3A2	44.2248	117.857	88.502	75.8092	54.3212	16.2767	77.1919	80.5082	15.7815	63.3858	0.705195	1.63036	0.254399	0.416562	63.3858	1.06485	2.09195	0.0845697	0.150481
BTN3A3	8.38745	12.5714	0	2.61411	12.1754	1.25205	7.71919	0	1.43469	5.12826	2.81946	7.05898	0.121507	0.245476	5.12826	3.22054	9.32135	0.0760588	0.137934
BTNL8	9.14995	0.785714	0	0.87137	0	1.25205	1.71537	13.8509	4.30406	3.54771	1.10335	2.14852	0.589912	0.72882	3.54771	1.4159	2.66826	0.487917	0.600224
BTNL9	0	0	0	0	0	0	5.14612	0	0	0.571792	5.14634	35.4162	0.263114	0.426297	0.571792	0	1	1	1
BTRC	118.187	294.643	104.938	157.718	257.557	143.986	145.807	340.212	40.1712	178.135	0.538908	1.45287	0.140984	0.273761	178.135	1.62114	3.07618	8.06729e-06	3.45486e-05
BUB1	1058.34	1309.79	874.905	1029.09	1089.23	827.607	1010.36	1185.12	928.242	1034.74	0.236308	1.17797	0.0726527	0.165899	1034.74	0.447067	1.36327	0.000670028	0.00209679
BUB1B	613.047	392.071	489.29	551.577	482.334	652.319	662.992	569.617	418.928	536.908	0.226921	1.17033	0.27626	0.440949	536.908	-0.11348	0.924356	0.587395	0.689645
BUB3	3770.54	2152.07	4208.9	3208.38	2768.51	3542.06	3168.3	2242.11	3982.69	3227.06	-0.209396	0.864899	0.115963	0.23722	3227.06	-0.712339	0.61033	9.52863e-08	5.11752e-07
BUD13	320.248	194.071	269.299	286.681	261.303	285.468	311.341	145.434	427.537	277.931	-0.0955482	0.935917	0.718182	0.824871	277.931	-0.708844	0.61181	0.00789736	0.0197224
BUD31	1537.95	1015.14	3116.53	1368.92	1223.16	3295.4	1432.34	1050.07	2867.94	1878.61	-1.09666	0.467599	5.16154e-19	1.78322e-17	1878.61	-1.49747	0.354173	9.82808e-34	3.04374e-32
BVES	6.86246	32.2143	2.52863	8.7137	3.74629	8.76437	13.723	17.3136	1.43469	10.589	1.1878	2.27805	0.294135	0.460146	10.589	2.05622	4.15896	0.0665946	0.123394
BVES-AS1	1.52499	0	16.4361	0	0	6.26026	0	0	2.86937	3.01008	-4.02563	0.0613995	0.0697178	0.160823	3.01008	-8.07478	0.00370893	0.0138564	0.0324507
BYSL	905.083	1145.57	1226.38	848.714	1411.41	1135.61	757.338	956.576	1021.5	1045.35	-0.430298	0.742108	0.00956283	0.0318664	1045.35	0.0537348	1.03795	0.745458	0.820882
BZRAP1	150.212	149.286	16.4361	166.432	140.486	76.3752	123.507	94.3591	30.1284	105.247	1.83616	3.57059	6.84034e-05	0.000406392	105.247	1.63992	3.11649	0.000385223	0.0012612
BZRAP1-AS1	0	0	0	0	0.936572	0	0	0	11.4775	1.37934	-6.96576	0.00800011	0.114701	0.23537	1.37934	-3.64036	0.0801943	0.339384	0.454826
BZW1	443.01	425.857	643.536	414.772	423.33	543.391	477.732	481.318	605.438	495.376	-0.424303	0.745199	0.00953502	0.031806	495.376	-0.429751	0.74239	0.00871983	0.021528
BZW2	927.957	751.143	1378.1	841.743	915.03	1257.06	789.072	779.111	1312.74	994.662	-0.625284	0.648292	7.10065e-06	5.16226e-05	994.662	-0.691708	0.61912	7.04406e-07	3.4579e-06
C10orf10	0	0	0	2.61411	0	0	14.5807	0	1.43469	2.06994	3.62876	12.3699	0.224537	0.38154	2.06994	-3.87008	0.0683898	0.329688	0.444549
C10orf105	39.6498	88	24.022	64.4814	66.4966	62.6026	53.1766	45.0153	44.4753	54.2133	0.261369	1.19862	0.59989	0.736208	54.2133	0.606781	1.52286	0.221427	0.325438
C10orf11	8.38745	4.71428	24.022	13.0705	0.936572	17.5287	16.2961	8.65679	15.7815	12.1549	-0.606052	0.656992	0.502101	0.657318	12.1549	-1.99595	0.250702	0.0347894	0.0717443
C10orf111	0.762496	0.785714	0	0	0	2.5041	5.14612	0	7.17343	1.8191	-0.707522	0.612371	0.783716	0.870061	1.8191	-3.5621	0.0846645	0.223097	0.327465
C10orf12	35.0748	88	26.5506	49.6681	26.224	0	37.7382	119.464	22.955	45.0749	1.31124	2.48154	0.096595	0.206781	45.0749	2.24459	4.73901	0.00424796	0.0112929
C10orf131	9.91245	0	0	5.22822	0	0	12.0076	0	10.0428	4.13234	1.45323	2.73821	0.449501	0.612787	4.13234	-6.70629	0.00957647	0.0391077	0.0791637
C10orf2	441.485	829.714	352.744	560.291	696.809	558.415	591.804	812.007	334.282	575.284	0.353899	1.27801	0.101628	0.214636	575.284	0.907935	1.87636	2.50753e-05	9.99867e-05
C10orf25	10.6749	7.85714	13.9075	15.6847	18.7314	10.0164	12.8653	27.7017	14.3469	14.6429	0.0356932	1.02505	0.9651	0.982121	14.6429	0.503355	1.41751	0.533817	0.641665
C10orf32	163.937	139.857	274.356	198.672	159.217	304.249	227.287	151.494	263.982	209.228	-0.515886	0.699363	0.0257078	0.0725527	209.228	-0.904362	0.534269	0.000107781	0.000387848
C10orf35	715.221	299.357	659.972	672.697	231.333	696.141	789.93	289.137	753.21	567.444	0.0465264	1.03278	0.778133	0.866847	567.444	-1.36145	0.389192	8.85059e-16	9.42668e-15
C10orf54	8.38745	0	1.26431	12.1992	5.61943	0	6.8615	46.7467	0	9.00873	4.40263	21.1507	0.0308934	0.0844204	9.00873	5.3344	40.3472	0.0086825	0.0214519
C10orf55	3.04998	0.785714	21.4933	6.09959	7.49257	32.5534	1.71537	0.865679	1.43469	8.38781	-2.35847	0.194998	0.0726546	0.165899	8.38781	-2.62367	0.162255	0.0483367	0.0946983
C10orf67	0.762496	0	3.79294	0.87137	1.87314	0	0.857687	0	21.5203	3.29755	-3.34043	0.0987261	0.112384	0.231949	3.29755	-3.79453	0.0720663	0.0807085	0.144738
C10orf76	120.474	179.929	134.017	113.278	165.773	154.002	89.1995	178.33	107.601	138.067	-0.294003	0.815636	0.29993	0.467034	138.067	0.403797	1.32299	0.14958	0.238541
C10orf82	83.1121	38.5	103.674	87.137	49.6383	86.3916	87.4841	53.6721	146.338	81.7719	-0.381998	0.767374	0.284705	0.449735	81.7719	-1.24561	0.421729	0.000650517	0.00204
C10orf88	56.4247	59.7143	96.0879	33.9834	76.7989	110.181	79.7649	51.0751	60.2568	69.3652	-0.64918	0.637643	0.141658	0.27468	69.3652	-0.509994	0.702225	0.247573	0.355638
C10orf95	8.38745	7.85714	31.6079	2.61411	7.49257	22.5369	13.723	3.46272	11.4775	12.1288	-1.41019	0.376263	0.130084	0.258267	12.1288	-1.80464	0.286252	0.0562115	0.107388
C11orf1	154.787	79.3571	427.338	172.531	83.3549	265.435	135.515	98.6875	395.973	201.442	-1.23367	0.425233	2.54341e-06	1.987e-05	201.442	-2.05825	0.240107	1.637e-14	1.59293e-13
C11orf24	1194.07	1311.36	1333.85	1289.63	1554.71	1354.72	1244.5	1206.76	1503.55	1332.57	-0.168984	0.889469	0.210374	0.36413	1332.57	-0.0416626	0.971535	0.757318	0.82972
C11orf30	210.449	193.286	175.74	215.228	193.87	262.931	325.921	268.361	65.9956	212.42	0.571498	1.48607	0.136931	0.268304	212.42	0.374387	1.29629	0.330605	0.445639
C11orf31	14657.5	5973.78	22033.2	13274.4	6856.64	25453	13170.6	6569.64	27323.6	15034.7	-0.863935	0.549452	4.5031e-15	1.05368e-13	15034.7	-1.94722	0.259316	1.34967e-69	1.70733e-67
C11orf45	1.52499	4.71428	0	2.61411	0	1.25205	0.857687	0	0	1.21813	1.97133	3.92129	0.540877	0.688826	1.21813	1.89934	3.73043	0.55636	0.661988
C11orf49	672.521	523.286	538.598	518.465	589.104	604.741	498.316	563.557	431.841	548.937	0.100461	1.07212	0.594869	0.731959	548.937	0.0880401	1.06293	0.641411	0.735002
C11orf54	105.224	44.7857	122.638	99.3361	111.452	115.189	106.353	79.6425	127.687	101.368	-0.232955	0.85089	0.522282	0.6738	101.368	-0.635565	0.643689	0.0832456	0.148539
C11orf57	315.673	310.357	371.708	359.004	274.415	343.062	393.679	294.331	444.753	345.22	-0.11749	0.92179	0.546525	0.693703	345.22	-0.397673	0.759081	0.0423922	0.0847895
C11orf58	1776.62	2076.64	2942.06	1741.87	1800.09	3346.74	1758.26	2260.29	3255.3	2328.65	-0.854884	0.55291	8.94488e-13	1.65313e-11	2328.65	-0.6368	0.643138	9.85137e-08	5.27706e-07
C11orf63	1.52499	7.07143	0	0.87137	0.936572	0	1.71537	0	25.8244	4.21601	-2.64264	0.160135	0.209942	0.363497	4.21601	-1.67243	0.313724	0.416994	0.531628
C11orf65	3.81248	0.785714	3.79294	0	19.668	21.2849	6.00381	0.865679	15.7815	7.99945	-2.05437	0.240754	0.166759	0.307899	7.99945	-0.946733	0.518806	0.515207	0.625156
C11orf68	996.582	546.857	953.293	894.025	723.033	573.44	904.86	546.244	932.546	785.653	0.185518	1.13722	0.357627	0.528606	785.653	-0.437408	0.73846	0.0308431	0.0646958
C11orf70	26.6874	14.1429	26.5506	8.7137	12.1754	10.0164	9.43456	14.7166	10.0428	14.72	-0.0540473	0.96323	0.949065	0.972604	14.72	-0.186282	0.878868	0.826367	0.881297
C11orf71	90.737	59.7143	193.44	46.1826	65.56	250.41	69.4727	30.2988	235.289	115.678	-1.71582	0.30443	3.82865e-06	2.91222e-05	115.678	-2.12653	0.229008	1.49967e-08	8.72377e-08
C11orf73	696.921	467.5	2340.25	532.407	421.457	2209.87	554.066	348.869	2111.86	1075.91	-1.90064	0.267825	1.40342e-33	1.54894e-31	1075.91	-2.42768	0.185865	1.07285e-52	7.57211e-51
C11orf74	330.161	139.857	711.809	216.971	125.501	654.823	274.46	128.986	654.217	359.643	-1.29727	0.406896	1.44121e-10	2.07355e-09	359.643	-2.35664	0.195246	1.11477e-29	2.84665e-28
C11orf80	221.886	175.214	351.479	268.382	258.494	316.769	200.699	254.51	324.239	263.519	-0.522845	0.695998	0.0251121	0.0712384	263.519	-0.529785	0.692658	0.0233818	0.0510438
C11orf84	394.21	281.286	199.762	325.892	243.509	171.531	501.747	322.033	199.421	293.266	1.09879	2.14174	2.43477e-06	1.90394e-05	293.266	0.570292	1.48482	0.0150692	0.0348835
C11orf86	54.8997	13.3571	44.251	33.112	72.116	38.8136	23.1576	11.2538	86.0812	41.8936	-0.601612	0.659017	0.39611	0.565111	41.8936	-0.809576	0.570549	0.254944	0.363527
C11orf87	5.33747	5.5	0	6.09959	29.9703	38.8136	9.43456	7.79111	7.17343	12.2356	-1.14416	0.452453	0.351985	0.522839	12.2356	-0.0953558	0.936041	0.93731	0.961397
C11orf91	5.33747	0	2.52863	3.48548	0	0	2.57306	0.865679	1.43469	1.80278	1.52762	2.8831	0.502055	0.657318	1.80278	-2.19665	0.218144	0.409804	0.524841
C11orf94	0	1.57143	0	0	1.87314	0	1.71537	5.19408	0	1.15045	3.55432	11.7478	0.379061	0.549754	1.15045	5.89564	59.5341	0.13454	0.219954
C11orf95	166.224	305.643	103.674	176.888	184.505	156.507	134.657	287.406	278.329	199.315	-0.16964	0.889064	0.623866	0.754151	199.315	0.533666	1.4476	0.120859	0.201534
C11orf96	4.57498	2.35714	0	3.48548	0	12.5205	1.71537	5.19408	8.60812	4.27285	-1.10828	0.463847	0.510446	0.664	4.27285	-1.47778	0.359041	0.38518	0.500695
C11orf98	89.9745	113.143	178.268	111.535	118.945	192.816	98.6341	96.0904	220.942	135.594	-0.980049	0.506963	0.000325503	0.00165571	135.594	-0.850505	0.55459	0.00177694	0.00511676
C12orf10	1067.49	848.571	1795.33	1031.7	1584.68	2052.11	858.545	908.963	1767.53	1323.88	-0.924758	0.526769	7.60301e-06	5.49589e-05	1323.88	-0.749252	0.594912	0.000284996	0.000955702
C12orf29	221.886	69.1428	448.832	196.93	67.4332	323.029	227.287	117.732	239.593	212.429	-0.647534	0.638371	0.0299152	0.0821844	212.429	-1.99291	0.251232	6.86412e-11	4.95742e-10
C12orf4	45.7498	20.4286	56.8941	30.4979	29.0337	106.424	24.0152	79.6425	109.036	55.7469	-1.43871	0.368898	0.0107366	0.0350672	55.7469	-1.07713	0.47397	0.0548598	0.105185
C12orf42	0	1.57143	0	0	0	0	0.857687	0	11.4775	1.54518	-3.7501	0.0743205	0.2909	0.456606	1.54518	-2.83998	0.139663	0.406363	0.521592
C12orf43	936.345	902	1069.61	1008.17	1096.73	852.648	873.983	870.873	1117.62	969.776	-0.108614	0.927478	0.491473	0.648866	969.776	-0.0830789	0.944041	0.598824	0.699407
C12orf45	1056.82	775.5	3454.11	873.112	815.754	3549.57	945.172	864.814	3619.71	1772.73	-1.88497	0.270749	4.4251e-57	2.69521e-54	1772.73	-2.11299	0.231167	1.28665e-70	1.69272e-68
C12orf49	733.521	525.643	751.003	825.187	607.835	936.535	650.985	680.424	909.591	735.636	-0.232933	0.850903	0.166552	0.307747	735.636	-0.518038	0.698321	0.00217394	0.00614479
C12orf56	17.5374	7.85714	21.4933	5.22822	1.87314	35.0575	1.71537	0	8.60812	11.0411	-1.40834	0.376744	0.240556	0.400359	11.0411	-2.72846	0.150887	0.0285091	0.0604866
C12orf57	1962.66	1585.57	5501.03	1609.42	2156.92	6041.15	1563.56	2058.59	6106.02	3176.1	-1.78058	0.291066	1.46453e-36	1.94228e-34	3176.1	-1.60548	0.328626	4.44585e-30	1.15867e-28
C12orf60	35.0748	13.3571	103.674	24.3984	10.3023	86.3916	53.1766	0.865679	0	36.36	-0.756508	0.591927	0.450532	0.613887	36.36	-2.95359	0.129086	0.00417282	0.0111111
C12orf65	1380.12	743.286	863.527	1423.82	586.294	822.598	1668.2	914.157	1047.32	1049.92	0.710754	1.63666	6.51469e-05	0.000389578	1049.92	-0.283802	0.821424	0.113141	0.190832
C12orf66	28.9748	10.2143	13.9075	37.4689	34.6531	63.8547	47.1728	10.3882	10.0428	28.5197	0.366604	1.28931	0.639961	0.766494	28.5197	-0.678349	0.62488	0.393373	0.508696
C12orf73	179.949	81.7143	434.924	157.718	79.6086	385.632	162.961	64.0603	362.976	212.171	-1.24111	0.423048	3.86082e-08	4.00575e-07	212.171	-2.39266	0.190431	3.04369e-24	5.64301e-23
C12orf75	489.522	199.571	563.884	377.303	274.415	593.473	470.013	202.569	378.757	394.39	-0.201274	0.869782	0.376687	0.547518	394.39	-1.1855	0.439673	2.75151e-07	1.41005e-06
C12orf76	89.212	59.7143	89.7663	88.0083	33.7166	154.002	96.061	27.7017	103.297	82.3867	-0.345701	0.786925	0.383828	0.554369	82.3867	-1.51464	0.349984	0.000201322	0.000692768
C14orf1	2311.89	857.214	2354.15	2461.62	781.101	2698.17	2091.9	755.738	2618.3	1881.12	-0.15994	0.895062	0.185091	0.330777	1881.12	-1.67943	0.312207	1.27087e-42	5.82157e-41
C14orf119	1724	894.928	3275.84	1476.1	1210.05	3547.06	1493.23	882.993	3438.94	1993.68	-1.12838	0.457429	2.63571e-15	6.35545e-14	1993.68	-1.78079	0.291023	2.36343e-35	7.85185e-34
C14orf132	648.122	1459.86	567.677	871.37	872.885	350.575	681.861	1252.64	385.931	787.879	0.754513	1.68706	0.000890436	0.00407549	787.879	1.45891	2.74901	1.17006e-10	8.29027e-10
C14orf142	228.749	105.286	283.206	212.614	117.071	569.684	169.822	90.8963	484.924	251.361	-1.1295	0.457073	4.69541e-05	0.000290177	251.361	-2.09485	0.234093	1.25722e-13	1.14925e-12
C14orf159	166.224	278.143	209.876	172.531	162.027	250.41	143.234	158.419	243.897	198.307	-0.546619	0.684623	0.0509216	0.125812	198.307	-0.232226	0.851321	0.405133	0.520338
C14orf166	4205.16	2043.64	8902.04	3710.29	2282.42	9594.48	3549.11	2325.21	8615.29	5025.29	-1.24165	0.422889	6.05996e-30	4.90916e-28	5025.29	-2.02748	0.245284	3.59335e-76	5.62788e-74
C14orf169	253.911	205.071	106.202	180.374	251.938	110.181	202.414	107.344	133.426	172.318	0.865933	1.82252	0.00871724	0.0296127	172.318	0.690728	1.6141	0.0368194	0.0750861
C14orf178	1.52499	0	6.32157	2.61411	12.1754	13.7726	0	0.865679	8.60812	5.09805	-2.79463	0.144123	0.10458	0.219198	5.09805	-1.15048	0.450474	0.482703	0.595503
C14orf2	2806.75	1520.36	7303.94	2359.67	1641.81	7825.33	2428.11	1415.39	7886.47	3909.76	-1.59932	0.330033	1.24945e-46	3.60477e-44	3909.76	-2.33013	0.198866	1.12127e-95	3.47912e-93
C14orf28	32.7873	11	34.1365	18.2988	42.1457	63.8547	29.1614	59.7319	30.1284	35.6938	-0.675491	0.626119	0.306348	0.474511	35.6938	-0.187474	0.878142	0.775084	0.843732
C14orf37	147.924	144.571	197.233	188.216	105.833	227.874	188.691	254.51	78.9077	170.418	0.0556503	1.03933	0.888342	0.938355	170.418	0.000601781	1.00042	0.99879	1
C14orf39	12.1999	0	26.5506	6.09959	12.1754	1.25205	8.57687	0	0	7.42828	-0.0515725	0.964884	0.976707	0.988856	7.42828	-1.20618	0.433416	0.500424	0.611765
C14orf79	26.6874	51.8571	69.5373	36.5975	88.9743	51.3341	50.6036	45.881	8.60812	47.7867	-0.191544	0.875668	0.762631	0.85633	47.7867	0.521674	1.43562	0.407484	0.522702
C14orf80	2376.7	2113.57	1746.02	2330.04	2647.69	1901.87	2349.21	2046.47	1598.24	2123.31	0.427265	1.34468	0.00115565	0.00514472	2123.31	0.375281	1.29709	0.00433515	0.0114949
C14orf93	97.5995	132	51.8369	56.639	76.7989	31.3013	81.4803	70.12	34.4325	70.2454	1.00337	2.00467	0.0240186	0.0686842	70.2454	1.24672	2.37302	0.00494506	0.0129596
C15orf27	126.574	53.4286	134.017	59.2531	124.564	36.3095	108.926	51.0751	78.9077	85.8951	0.242806	1.18329	0.639584	0.766356	85.8951	-0.124023	0.917625	0.811638	0.871108
C15orf39	605.422	1219.43	390.673	670.955	935.635	569.684	643.266	1321.03	341.455	744.172	0.558732	1.47297	0.00617621	0.022157	744.172	1.41577	2.66802	3.15296e-12	2.57195e-11
C15orf40	400.31	177.571	608.135	437.428	212.602	500.821	478.59	227.674	560.962	400.455	-0.343545	0.788102	0.0631138	0.149124	400.455	-1.43554	0.369708	3.18411e-14	3.032e-13
C15orf41	44.2248	33	168.154	59.2531	32.78	86.3916	47.1728	33.7615	14.3469	57.6761	-0.839022	0.559022	0.178233	0.322201	57.6761	-1.43637	0.369497	0.022286	0.0489179
C15orf52	8.38745	62.8571	0	8.7137	8.42914	0	6.8615	12.9852	1.43469	12.1854	4.16598	17.9508	0.0182824	0.0550246	12.1854	5.98336	63.2661	0.000632447	0.00198826
C15orf56	4.57498	0	0	3.48548	0	10.0164	0.857687	1.73136	0	2.29621	-0.172109	0.887545	0.943608	0.969488	2.29621	-2.54077	0.171851	0.328588	0.443283
C15orf57	134.962	98.2143	177.004	132.448	105.833	231.63	127.795	108.21	265.417	153.501	-0.768785	0.586912	0.00352403	0.0137655	153.501	-1.10933	0.46351	3.05539e-05	0.000120062
C15orf59	135.724	150.071	63.2157	94.1079	101.15	26.2931	133.799	174.867	106.167	109.488	0.90018	1.8663	0.0412218	0.106643	109.488	1.12906	2.18716	0.010351	0.0250696
C15orf59-AS1	10.6749	3.92857	21.4933	2.61411	0	1.25205	4.28844	0.865679	22.955	7.56357	-1.37076	0.386688	0.307449	0.475635	7.56357	-3.21837	0.107442	0.0253517	0.0547483
C15orf61	186.811	95.8571	145.396	148.133	69.3063	296.736	140.661	78.7768	213.768	152.827	-0.463204	0.725374	0.142931	0.276236	152.827	-1.4253	0.372343	9.58675e-06	4.0622e-05
C15orf62	28.2123	7.85714	12.6431	34.8548	4.68286	0	20.5845	35.4929	31.5631	19.5434	0.92826	1.90298	0.378088	0.548899	19.5434	0.128279	1.09299	0.90377	0.938467
C15orf65	15.2499	14.9286	10.1145	10.4564	0	0	1.71537	1.73136	4.30406	6.50003	0.928897	1.90382	0.569289	0.712966	6.50003	0.21754	1.16275	0.894835	0.931896
C16orf13	3624.14	2004.36	5129.32	2901.66	2480.98	5805.77	3174.3	2358.98	5951.08	3714.51	-0.799538	0.574533	3.69696e-10	5.0706e-09	3714.51	-1.30308	0.40526	2.2787e-24	4.26802e-23
C16orf45	582.547	400.714	479.175	639.585	457.984	341.81	758.196	438.899	677.172	530.676	0.403963	1.32314	0.0764301	0.172698	530.676	-0.206018	0.866927	0.368551	0.484478
C16orf46	23.6374	20.4286	20.229	39.2116	16.8583	45.0739	18.0114	5.19408	32.9978	24.6269	-0.282837	0.821973	0.685163	0.800249	24.6269	-1.20849	0.43272	0.0898023	0.158164
C16orf52	68.6246	79.3571	42.9867	115.892	66.4966	60.0985	127.795	95.2247	32.9978	76.6082	1.19319	2.28658	0.00404402	0.0155074	76.6082	0.821666	1.76745	0.0489803	0.095731
C16orf54	13.7249	71.5	31.6079	16.556	34.6531	1.25205	30.0191	45.0153	60.2568	33.8428	-0.622842	0.649391	0.452256	0.615134	33.8428	0.705569	1.63079	0.388622	0.504132
C16orf58	329.398	454.143	337.572	387.76	301.576	146.49	307.91	358.391	152.077	308.368	0.686746	1.60965	0.024611	0.0700705	308.368	0.807651	1.75036	0.00818846	0.0203751
C16orf59	2266.9	1515.64	2169.56	2105.23	2054.84	2248.69	1867.19	1482.91	2045.86	1972.98	-0.0510688	0.965221	0.728921	0.83215	1972.98	-0.35576	0.781458	0.0159571	0.0367115
C16orf62	256.199	484	164.361	258.797	364.326	122.701	213.564	421.586	206.595	276.903	0.564722	1.4791	0.0213261	0.0622484	276.903	1.36673	2.57886	1.94772e-08	1.12111e-07
C16orf70	76.2496	150.857	49.3083	40.9544	42.1457	20.0328	109.784	58.8662	80.3424	69.8378	0.604958	1.52093	0.309385	0.477552	69.8378	0.757133	1.69013	0.20298	0.304091
C16orf71	6.86246	10.2143	0	7.84233	0	1.25205	5.14612	7.79111	0	4.34537	3.94319	15.3822	0.0672853	0.156596	4.34537	3.8077	14.0034	0.0776374	0.140348
C16orf72	192.149	275	257.92	160.332	208.855	242.898	156.957	212.957	206.595	212.629	-0.473768	0.720081	0.04812	0.120339	212.629	-0.0216872	0.98508	0.9274	0.955223
C16orf74	306.523	76.2143	222.519	166.432	117.071	165.271	269.314	82.2395	246.766	183.594	0.227998	1.17121	0.458621	0.620217	183.594	-1.20493	0.43379	0.000126771	0.00045095
C16orf86	48.7997	20.4286	48.0439	34.8548	69.3063	105.172	42.8844	35.4929	20.0856	47.2298	-0.456519	0.728742	0.466921	0.626971	47.2298	-0.475821	0.719058	0.448711	0.562599
C16orf87	261.536	84.8571	312.286	238.755	80.5452	341.81	236.722	139.374	342.89	226.531	-0.435439	0.739469	0.082547	0.183618	226.531	-1.70956	0.305754	3.31399e-11	2.44717e-10
C16orf89	116.662	74.6428	184.59	150.747	131.12	246.654	124.365	121.195	261.113	156.788	-0.821499	0.565854	0.00618457	0.0221822	156.788	-1.08435	0.471605	0.000327833	0.00108716
C16orf90	0.762496	0	0	0	0	0	0	6.05976	0	0.758028	2.42265	5.36156	0.613701	0.746004	0.758028	5.38418	41.7639	0.241247	0.348591
C16orf91	899.745	557.857	1385.69	929.751	704.302	1456.14	866.264	502.094	1411.73	968.174	-0.658011	0.633751	1.03804e-05	7.36437e-05	968.174	-1.27052	0.414509	3.11381e-17	3.69456e-16
C16orf93	4.57498	7.07143	13.9075	6.97096	0.936572	8.76437	3.43075	6.05976	11.4775	7.02153	-1.1903	0.438211	0.291747	0.457454	7.02153	-1.26901	0.414946	0.263087	0.372249
C16orf95	138.774	55	158.039	115.892	114.262	275.452	150.953	161.882	208.03	153.143	-0.661394	0.632267	0.0757746	0.171405	153.143	-0.956061	0.515462	0.0105834	0.0255609
C16orf96	0.762496	1.57143	0	5.22822	2.80971	52.5862	0.857687	4.3284	15.7815	9.32508	-3.33131	0.0993517	0.0193024	0.0574352	9.32508	-2.97751	0.126963	0.034332	0.0709105
C17orf100	93.787	88	109.995	77.5519	107.706	187.808	101.207	19.9106	190.813	108.531	-0.841554	0.558042	0.0792797	0.177963	108.531	-1.18042	0.441222	0.0142479	0.0332067
C17orf104	35.0748	61.2857	101.145	59.2531	78.672	75.1231	52.3189	46.7467	107.601	68.5801	-0.954207	0.516125	0.019291	0.0574192	68.5801	-0.604657	0.657628	0.135559	0.221202
C17orf107	74.7246	101.357	59.4228	61.8672	53.3846	6.26026	36.0229	75.3141	11.4775	53.3146	1.15782	2.23119	0.0853743	0.188441	53.3146	1.57247	2.97414	0.0191731	0.0430505
C17orf49	93.787	64.4286	93.5593	85.3942	73.0526	148.994	74.6188	80.5082	110.471	91.646	-0.476033	0.718952	0.157861	0.296486	91.646	-0.696945	0.616877	0.0398971	0.0805831
C17orf50	16.0124	15.7143	20.229	8.7137	3.74629	30.0493	8.57687	36.3585	0	15.4889	-0.597819	0.660752	0.590857	0.729258	15.4889	0.146407	1.10681	0.894416	0.931835
C17orf51	77.7746	117.857	15.1718	75.8092	147.978	58.8465	62.6112	154.957	67.4303	86.4928	0.616793	1.53346	0.1806	0.325405	86.4928	1.57684	2.98316	0.000553612	0.00175858
C17orf53	130.387	192.5	122.638	131.577	89.9109	171.531	143.234	185.255	119.079	142.901	-0.0296019	0.979691	0.930008	0.961825	142.901	0.17927	1.13231	0.594069	0.695398
C17orf58	308.048	197.214	354.008	305.851	177.012	413.177	247.014	212.957	261.113	275.155	-0.257582	0.836489	0.267165	0.430682	275.155	-0.809454	0.570598	0.000553249	0.00175776
C17orf59	221.886	187	132.753	206.515	143.295	249.158	131.226	241.525	460.534	219.321	-0.587918	0.665302	0.124031	0.249107	219.321	-0.556846	0.679787	0.145246	0.233214
C17orf62	1606.58	1739.57	1390.75	1808.09	1875.95	1522.5	1645.04	1560.82	1586.76	1637.34	0.169258	1.12448	0.175494	0.319157	1637.34	0.202138	1.1504	0.105733	0.18069
C17orf64	2.28749	5.5	2.52863	4.35685	0	0	2.57306	6.92544	0	2.68572	1.8436	3.58905	0.404373	0.572595	2.68572	2.28007	4.857	0.300261	0.412273
C17orf67	126.574	51.0714	134.017	71.4523	73.0526	130.213	168.107	93.4934	136.295	109.364	-0.129035	0.914443	0.732033	0.834832	109.364	-0.881498	0.542804	0.0208515	0.046176
C17orf74	6.86246	5.5	0	1.74274	7.49257	0	0.857687	0.865679	0	2.59124	6.03419	65.5348	0.0617208	0.146448	2.59124	6.57667	95.4495	0.0412152	0.0828003
C17orf75	783.846	302.5	1044.32	494.938	336.229	934.031	532.624	286.54	866.551	620.176	-0.650642	0.636997	0.000871419	0.003994	620.176	-1.62113	0.325081	2.6228e-16	2.92618e-15
C17orf80	166.224	167.357	314.814	135.934	170.456	102.668	180.114	182.658	480.62	211.205	-0.895296	0.537637	0.0233651	0.0671864	211.205	-0.785505	0.580149	0.0465673	0.0918446
C17orf85	516.972	850.143	582.849	698.838	807.325	363.095	771.061	867.411	559.528	668.58	0.400457	1.31993	0.0537633	0.131442	668.58	0.746761	1.67802	0.00031418	0.0010461
C17orf89	1597.43	954.643	3443.99	1425.56	1043.34	4170.59	1219.63	1068.25	3813.4	2081.87	-1.42923	0.371328	1.57298e-26	1.00653e-24	2081.87	-1.89828	0.268263	4.4884e-45	2.29943e-43
C17orf96	78.5371	44	24.022	68.8382	46.8286	18.7808	40.3113	77.0455	12.9122	45.6973	1.74754	3.35784	0.00104085	0.00469339	45.6973	1.58531	3.00072	0.00300677	0.00823968
C17orf97	39.6498	15.7143	27.8149	21.7842	36.5263	20.0328	24.0152	12.9852	21.5203	24.4492	0.302415	1.23321	0.649445	0.773026	24.4492	-0.0943889	0.936669	0.888111	0.927301
C18orf21	576.447	230.214	935.593	519.336	466.413	770.012	484.593	335.884	1012.89	592.376	-0.782004	0.581558	0.000598771	0.0028733	592.376	-1.39822	0.379396	1.06856e-09	6.9594e-09
C18orf25	61.7622	51.0714	6.32157	110.664	102.086	80.1313	95.2033	94.3591	37.3018	70.989	1.11094	2.15986	0.0712861	0.163501	70.989	0.997852	1.99702	0.105587	0.180497
C18orf32	10.6749	4.71428	25.2863	16.556	3.74629	27.5452	35.1652	6.05976	27.259	17.4452	-0.362608	0.777757	0.626035	0.755939	17.4452	-2.46092	0.181631	0.00225538	0.00635098
C18orf54	64.8122	102.929	77.1232	67.0955	86.1646	28.7972	74.6188	97.8218	70.2996	74.4068	0.231111	1.17374	0.581336	0.722217	74.4068	0.706268	1.63158	0.0899992	0.158377
C18orf61	6.86246	0	0	0.87137	0	0	0	0	1.43469	1.01872	2.465	5.52128	0.515765	0.668576	1.01872	-3.88596	0.0676411	0.397586	0.512808
C18orf8	161.649	84.8571	80.9161	123.734	81.4817	166.523	142.376	48.478	60.2568	105.586	0.472791	1.38779	0.247975	0.408625	105.586	-0.521035	0.696872	0.208723	0.311193
C19orf12	478.085	290.714	341.365	403.444	310.005	313.013	300.191	344.54	284.068	340.603	0.332601	1.25928	0.12892	0.256732	340.603	0.00953845	1.00663	0.965425	0.981723
C19orf18	3.04998	2.35714	0	2.61411	0	0	0.857687	13.8509	0	2.52553	5.49272	45.027	0.103958	0.218534	2.52553	6.80449	111.778	0.0425625	0.0850785
C19orf24	1806.35	1733.29	2622.19	1242.57	1819.76	3196.49	1559.28	1609.3	3329.91	2102.13	-0.988841	0.503882	8.73787e-11	1.29222e-09	2102.13	-0.825439	0.564311	6.01069e-08	3.30257e-07
C19orf25	2593.25	1917.14	2426.22	2616.72	2421.97	2613.03	2458.13	1858.61	2771.81	2408.54	-0.0264644	0.981824	0.836866	0.905888	2408.54	-0.333962	0.793355	0.00950521	0.0232471
C19orf43	5473.96	3988.28	6353.18	5046.1	4798.99	6998.97	5267.06	4372.55	6037.16	5370.69	-0.296573	0.814184	0.00654401	0.023257	5370.69	-0.559405	0.678582	3.00329e-07	1.53145e-06
C19orf44	88.4495	93.5	55.6298	95.8507	153.598	133.97	100.349	55.4035	47.3446	91.5661	0.261592	1.1988	0.578807	0.720166	91.5661	0.348252	1.27302	0.459755	0.573286
C19orf45	7.62496	5.5	7.58589	6.97096	9.36572	3.75616	6.8615	14.7166	40.1712	11.3948	-1.25403	0.419275	0.226118	0.383155	11.3948	-0.793396	0.576984	0.439555	0.55361
C19orf47	138.774	104.5	80.9161	147.261	52.448	77.6272	110.642	85.7023	86.0812	98.2169	0.698157	1.62243	0.0478795	0.119918	98.2169	-0.00786116	0.994566	0.982439	0.992579
C19orf48	10852.6	5910.14	10839	11363.5	8149.11	12679.5	10267.4	6148.06	12702.7	9879.11	-0.157103	0.896824	0.233382	0.391868	9879.11	-0.842072	0.557842	1.75999e-10	1.23109e-09
C19orf52	909.658	940.5	1153.05	873.984	1027.42	1434.85	752.192	789.5	869.42	972.286	-0.447778	0.733171	0.0169613	0.0516533	972.286	-0.327207	0.797078	0.0809125	0.145025
C19orf53	5214.71	5002.64	7791.97	4849.17	5392.78	9228.88	5674.46	6197.4	9652.57	6556.06	-0.761046	0.590068	7.46614e-10	9.79894e-09	6556.06	-0.684821	0.622083	3.03147e-08	1.70962e-07
C19orf54	143.349	220.786	116.317	134.191	106.769	100.164	156.099	120.329	103.297	133.478	0.439189	1.35584	0.189207	0.336197	133.478	0.488246	1.40274	0.144433	0.232202
C19orf57	27.4499	47.9286	0	40.9544	72.116	1.25205	35.1652	28.5674	0	28.1593	6.30683	79.1674	6.09413e-05	0.000366428	28.1593	6.82766	113.588	1.39745e-05	5.7843e-05
C19orf60	4677.15	3924.64	7331.76	3668.47	4454.33	7509.81	4191.52	4316.28	8371.39	5382.82	-0.888486	0.540181	5.84792e-14	1.22508e-12	5382.82	-0.87066	0.546896	1.84187e-13	1.66244e-12
C19orf66	465.885	281.286	380.559	427.843	379.311	291.728	373.094	249.316	253.939	344.773	0.45093	1.36692	0.0528017	0.129408	344.773	-0.0277342	0.98096	0.905718	0.93954
C19orf68	349.223	440.786	195.969	325.021	249.128	138.978	421.125	476.989	328.543	325.085	0.725846	1.65387	0.0201551	0.0595277	325.085	0.817818	1.76274	0.00883455	0.021772
C19orf70	903.558	818.714	1912.91	712.78	719.287	1767.9	743.615	752.275	2070.25	1155.7	-1.28417	0.410607	1.30257e-19	4.69753e-18	1155.7	-1.32763	0.398423	8.3761e-21	1.28135e-19
C19orf71	6.86246	6.28571	1.26431	12.1992	13.112	0	5.14612	6.92544	2.86937	6.07384	2.58536	6.00166	0.0699388	0.16122	6.07384	2.70437	6.51772	0.057804	0.109845
C19orf73	147.162	62.0714	175.74	109.793	61.8137	227.874	103.78	55.4035	163.554	123.021	-0.652436	0.636205	0.028801	0.0795945	123.021	-1.66241	0.315911	6.15976e-08	3.3777e-07
C19orf81	304.236	136.714	509.519	286.681	171.393	837.623	284.752	136.777	890.94	395.404	-1.35307	0.391457	3.25233e-09	3.95011e-08	395.404	-2.33157	0.198668	1.48253e-23	2.6529e-22
C19orf84	166.224	58.9286	168.154	158.589	106.769	103.92	197.268	58.0005	196.552	134.934	0.157417	1.11529	0.648789	0.772636	134.934	-1.06856	0.476795	0.00242816	0.00679332
C1D	120.474	29.0714	331.25	147.261	43.0823	256.671	150.953	16.4479	285.503	153.413	-1.06152	0.479127	0.000663776	0.00315121	153.413	-3.30704	0.101037	9.28466e-23	1.57734e-21
C1GALT1	554.335	350.428	719.395	669.212	292.21	980.357	705.877	348.003	741.733	595.728	-0.340446	0.789797	0.0627003	0.148307	595.728	-1.301	0.405845	2.25619e-12	1.86167e-11
C1GALT1C1	182.999	105.286	245.277	144.647	106.769	262.931	174.968	158.419	199.421	175.635	-0.494014	0.710047	0.0687482	0.159056	175.635	-0.934846	0.523098	0.000645408	0.00202514
C1orf106	61.7622	110.786	56.8941	64.4814	115.198	25.041	66.8996	115.135	27.259	71.4952	0.818849	1.764	0.0500405	0.124139	71.4952	1.6396	3.11578	7.31319e-05	0.000270563
C1orf109	240.186	293.071	276.885	240.498	228.523	300.493	249.587	193.912	315.631	259.865	-0.289853	0.817985	0.193227	0.341642	259.865	-0.318043	0.802157	0.153976	0.24425
C1orf112	66.3371	76.2143	121.374	72.3237	63.6869	86.3916	55.7497	103.882	50.214	77.3526	-0.411229	0.751982	0.323078	0.492576	77.3526	-0.0842836	0.943253	0.838801	0.890861
C1orf115	294.323	174.429	231.37	352.033	329.673	184.052	260.737	180.061	157.815	240.499	0.660849	1.58101	0.0239611	0.0685884	240.499	0.252314	1.19112	0.390665	0.506104
C1orf116	55.6622	113.929	60.6871	42.6971	96.4669	98.9121	72.9034	167.076	53.0834	84.6019	-0.314998	0.803852	0.444593	0.608635	84.6019	0.825388	1.77201	0.0418167	0.083822
C1orf122	2238.69	1422.93	3261.93	1801.12	1658.67	3623.44	2174.24	1551.3	4040.08	2419.15	-0.813716	0.568915	7.12133e-10	9.39889e-09	2419.15	-1.23779	0.424021	9.08707e-21	1.38882e-19
C1orf123	1675.2	1129.07	2313.7	1456.93	1129.51	2297.52	1375.73	990.337	2195.07	1618.12	-0.594204	0.66241	1.77838e-06	1.4273e-05	1618.12	-1.067	0.47731	1.44264e-17	1.75345e-16
C1orf127	5.33747	0	0	13.9419	0	3.75616	0	0	10.0428	3.67537	0.488379	1.40287	0.81419	0.890379	3.67537	-7.17624	0.00691413	0.0317488	0.066291
C1orf131	264.586	119.429	426.074	216.1	124.564	401.909	233.291	146.3	530.834	273.676	-0.926707	0.526058	1.68487e-05	0.000114259	273.676	-1.79911	0.287351	3.23091e-16	3.57793e-15
C1orf145	8.38745	3.14286	0	1.74274	0	1.25205	11.1499	3.46272	5.73875	3.87517	1.62831	3.0915	0.357388	0.528434	3.87517	-0.0505336	0.965579	0.97787	0.989422
C1orf159	683.196	567.286	364.122	690.996	831.676	456.999	614.962	711.588	542.311	607.015	0.546174	1.46021	0.005609	0.0204252	607.015	0.630861	1.54849	0.00137423	0.0040493
C1orf167	4.57498	1.57143	0	8.7137	2.80971	0	0	0	11.4775	3.23859	0.222816	1.16701	0.922001	0.956604	3.23859	-1.38246	0.383564	0.554071	0.659933
C1orf168	0	0	0	7.84233	0	0	3.43075	0	0	1.25256	6.27814	77.6085	0.142351	0.275478	1.25256	0	1	1	1
C1orf174	439.198	316.643	283.206	437.428	364.326	413.177	333.64	231.136	489.228	367.554	0.0309519	1.02169	0.901401	0.945621	367.554	-0.377669	0.76968	0.132274	0.216938
C1orf177	5.33747	0	0	0	0	0	6.8615	0.865679	0	1.45163	6.39455	84.1303	0.107349	0.223718	1.45163	2.57465	5.95726	0.540594	0.64721
C1orf198	263.824	314.286	151.718	315.436	372.755	159.011	233.291	186.121	170.728	240.797	0.755452	1.68816	0.00692375	0.0244023	240.797	0.858989	1.81377	0.00212637	0.00602277
C1orf21	582.547	577.5	1020.3	594.274	463.603	1050.47	584.943	526.333	1235.26	737.249	-0.907566	0.533084	1.96632e-09	2.45529e-08	737.249	-1.07524	0.474593	1.4013e-12	1.17694e-11
C1orf210	108.274	100.571	163.097	63.61	82.4183	166.523	70.3304	15.5822	96.124	96.2811	-0.813612	0.568955	0.119904	0.242956	96.2811	-1.10042	0.466382	0.0360725	0.0738378
C1orf216	86.162	351.214	103.674	111.535	257.557	63.8547	132.942	647.528	60.2568	201.636	0.534563	1.4485	0.146313	0.28122	201.636	2.46159	5.50825	1.15829e-11	8.92182e-11
C1orf220	1.52499	0	7.58589	1.74274	8.42914	7.51231	3.43075	3.46272	12.9122	5.17786	-2.06522	0.23895	0.154637	0.2924	5.17786	-1.24678	0.421387	0.377877	0.493817
C1orf226	234.086	444.714	54.3655	318.05	375.565	211.597	230.718	670.036	140.599	297.748	0.944996	1.92518	0.0100287	0.0331768	297.748	1.87414	3.66584	2.96555e-07	1.51408e-06
C1orf228	2.28749	3.14286	7.58589	0	0	0	0.857687	0	0	1.54155	-1.2665	0.415668	0.687375	0.801706	1.54155	-1.26114	0.417214	0.688913	0.77475
C1orf229	2.28749	2.35714	1.26431	2.61411	13.112	1.25205	0.857687	14.7166	0	4.27348	1.16342	2.23988	0.518288	0.67054	4.27348	3.54866	11.7018	0.0406026	0.0817871
C1orf233	356.848	637.214	158.039	492.324	435.506	351.827	398.825	406.004	317.066	394.85	0.594094	1.50952	0.0363835	0.0962929	394.85	0.839708	1.78969	0.0030673	0.00839437
C1orf234	0	4.71428	0	0	0	0	0	0	0	0.523809	0	1	1	1	0.523809	5.02887	32.6468	0.274657	0.384343
C1orf27	151.737	60.5	244.013	209.129	78.672	196.572	148.38	116.001	269.721	163.858	-0.47987	0.717042	0.116815	0.238458	163.858	-1.47761	0.359083	2.16118e-06	9.92202e-06
C1orf35	3607.37	3324.36	2944.59	3597.89	3528.07	2798.34	4297.87	3937.98	2997.06	3448.17	0.39635	1.31617	0.000719709	0.00337967	3448.17	0.30407	1.23462	0.00951344	0.0232603
C1orf43	1823.89	998.643	2968.61	1627.72	1592.17	2655.6	1317.41	1055.26	2714.43	1861.53	-0.805967	0.571979	6.78921e-06	4.95116e-05	1861.53	-1.19411	0.437057	2.85387e-11	2.11978e-10
C1orf50	362.186	211.357	647.329	350.291	255.684	611.002	384.244	223.345	655.652	411.232	-0.803209	0.573073	1.88217e-06	1.50619e-05	411.232	-1.47227	0.360414	9.3306e-18	1.1537e-16
C1orf52	1128.49	508.357	1048.12	1164.15	499.193	1113.07	1053.24	485.646	919.634	879.989	0.118435	1.08556	0.380948	0.551615	879.989	-1.04546	0.48449	3.12574e-14	2.97987e-13
C1orf53	14.4874	4.71428	37.9294	13.9419	5.61943	25.041	8.57687	4.3284	37.3018	16.8823	-1.43562	0.369687	0.0441481	0.112456	16.8823	-2.77549	0.146048	0.00028341	0.000950964
C1orf54	291.273	143	648.593	291.909	131.12	790.045	308.767	156.688	862.246	402.627	-1.36672	0.387772	1.1446e-13	2.34117e-12	402.627	-2.41585	0.187394	5.14643e-37	1.85193e-35
C1orf56	213.499	180.714	194.704	151.618	191.061	302.997	166.391	176.599	197.987	197.286	-0.388339	0.764009	0.146418	0.281356	197.286	-0.34463	0.78751	0.197531	0.297828
C1orf61	44.2248	25.9286	82.1804	32.2407	8.42914	55.0903	48.0305	13.8509	104.732	46.0786	-0.956685	0.515239	0.0654806	0.153285	46.0786	-2.31526	0.200926	1.88027e-05	7.63104e-05
C1orf64	2.28749	6.28571	0	0	0	0	0	0	0	0.952578	3.99041	15.894	0.390143	0.559944	0.952578	5.44227	43.4798	0.236078	0.34287
C1orf74	73.1996	80.1428	175.74	74.9378	55.2577	138.978	81.4803	30.2988	182.205	99.1377	-1.11348	0.462179	0.00305698	0.0121547	99.1377	-1.58097	0.334256	3.21641e-05	0.000125998
C1orf94	118.187	73.0714	18.9647	99.3361	40.2726	11.2685	78.9072	91.762	185.075	79.6493	0.466544	1.3818	0.514993	0.667854	79.6493	-0.0643671	0.956365	0.928627	0.956008
C1orf95	8.38745	8.64286	0	6.97096	3.74629	23.789	5.14612	0.865679	0	6.39426	-0.219714	0.858736	0.891645	0.940038	6.39426	-0.845011	0.556707	0.603846	0.703724
C1QBP	6104.54	5088.28	12547.1	5529.71	6573.8	12917.4	4610.07	5076.34	12138.9	7842.9	-1.21086	0.432011	1.39261e-19	5.00032e-18	7842.9	-1.16785	0.445085	2.52306e-18	3.24597e-17
C1QL1	125.049	114.714	67.0087	101.95	93.6572	142.734	200.699	103.016	74.6037	113.715	0.586767	1.50188	0.128702	0.256515	113.715	0.12981	1.09415	0.738244	0.815848
C1QL2	14.4874	7.85714	25.2863	8.7137	25.2874	37.5616	11.1499	12.1195	43.0406	20.6115	-1.61959	0.325428	0.0235018	0.0675205	20.6115	-1.23214	0.425684	0.0816861	0.146173
C1QL3	1.52499	0.785714	0	1.74274	0	0	0	10.3882	10.0428	2.72049	-1.6054	0.328644	0.524782	0.6757	2.72049	0.165775	1.12177	0.946064	0.967917
C1QL4	2.28749	11	2.52863	12.1992	13.112	2.5041	9.43456	19.0449	7.17343	8.80937	0.980633	1.97333	0.380687	0.551479	8.80937	1.83716	3.57305	0.0963148	0.167431
C1QTNF1	38.1248	47.1428	34.1365	29.6266	39.336	2.5041	34.3075	47.6124	4.30406	30.7883	1.31032	2.47996	0.091869	0.199523	30.7883	1.70401	3.25806	0.0279109	0.0594219
C1QTNF2	55.6622	36.9286	101.145	81.9087	62.7503	5.00821	62.6112	49.3437	103.297	62.0728	-0.0637999	0.956741	0.925075	0.958556	62.0728	-0.490304	0.711875	0.471491	0.585095
C1QTNF3	3.81248	3.14286	11.3788	8.7137	9.36572	0	2.57306	5.19408	12.9122	6.34365	-0.683221	0.622773	0.613135	0.746004	6.34365	-0.456302	0.728852	0.734703	0.813173
C1QTNF4	80.0621	140.643	64.48	51.4108	103.023	122.701	90.9149	156.688	119.079	103.222	-0.459791	0.727092	0.227111	0.38448	103.222	0.388411	1.30895	0.302029	0.414434
C1QTNF6	35.0748	44.7857	21.4933	47.054	79.6086	27.5452	47.1728	89.165	0	43.5444	1.38505	2.61181	0.0511163	0.12618	43.5444	2.10879	4.31331	0.002841	0.00783241
C1QTNF8	0.762496	6.28571	0	0	0	0	0	0	0	0.783134	2.42265	5.36157	0.613701	0.746004	0.783134	5.44229	43.4802	0.236077	0.34287
C1R	241.711	129.643	152.982	169.046	209.792	95.156	204.13	249.316	101.863	172.626	0.812598	1.75637	0.0117595	0.0378813	172.626	0.748194	1.67969	0.0205079	0.0455623
C1RL	102.937	88	121.374	122.863	173.266	126.457	120.934	125.524	93.2546	119.401	0.0214692	1.01499	0.948805	0.972398	119.401	0.1774	1.13084	0.595172	0.69628
C1RL-AS1	9.14995	30.6428	1.26431	18.2988	34.6531	12.5205	11.1499	25.1047	45.91	20.966	-0.621936	0.649798	0.494658	0.651142	20.966	0.60768	1.52381	0.498062	0.609401
C1S	38.1248	69.1428	48.0439	52.2822	43.0823	10.0164	36.0229	60.5976	7.17343	40.4985	0.947198	1.92812	0.152038	0.289099	40.4985	1.39961	2.6383	0.0336261	0.0697329
C20orf166-AS1	0	0	6.32157	1.74274	4.68286	0	1.71537	10.3882	0	2.76119	-0.888613	0.540133	0.715901	0.822884	2.76119	1.24316	2.36716	0.598631	0.699281
C20orf194	63.2872	85.6428	42.9867	61.8672	114.262	20.0328	39.4536	122.061	48.7793	66.4858	0.563708	1.47806	0.212897	0.367453	66.4858	1.53004	2.88794	0.00062102	0.00195645
C20orf195	101.412	73.8571	37.9294	53.1535	65.56	20.0328	80.6226	58.0005	58.8221	61.0434	1.01777	2.02479	0.0332539	0.0894147	61.0434	0.764386	1.69865	0.111185	0.188028
C20orf196	130.387	63.6428	131.489	105.436	76.7989	170.279	75.4765	66.6573	213.768	114.882	-0.724897	0.60504	0.0291517	0.0804092	114.882	-1.31546	0.401796	9.47061e-05	0.000343882
C20orf24	320.248	183.857	546.184	277.967	284.718	585.96	257.306	193.912	556.658	356.312	-0.980576	0.506778	4.67045e-06	3.49275e-05	356.312	-1.35225	0.391681	3.66937e-10	2.50285e-09
C20orf27	6506.38	5605.28	8135.86	5700.5	6505.43	6933.87	4833.93	4942.16	8494.78	6406.46	-0.467476	0.723229	0.000932528	0.00425157	6406.46	-0.466602	0.723667	0.000954435	0.0028959
C20orf96	95.312	65.2143	122.638	108.921	54.3212	138.978	79.7649	62.3289	55.9528	87.0479	-0.164606	0.892172	0.675341	0.793228	87.0479	-0.806635	0.571714	0.0425803	0.0851036
C21orf2	764.021	918.5	772.496	719.751	905.665	783.785	700.731	854.426	925.373	816.083	-0.182918	0.880919	0.190074	0.337301	816.083	0.11107	1.08003	0.424787	0.539305
C21orf33	86.9245	101.357	89.7663	75.8092	88.0377	95.156	85.7687	102.15	63.1262	87.5662	0.00020106	1.00014	0.999523	1	87.5662	0.230869	1.17354	0.490872	0.603047
C21orf58	489.522	590.857	663.765	457.469	466.413	729.946	517.186	575.677	571.005	562.427	-0.424971	0.744854	0.0133632	0.0422367	562.427	-0.266923	0.83109	0.119701	0.200212
C21orf59	2588.67	1826	3665.25	2099.13	1867.52	3517.01	2675.98	1994.53	3358.6	2621.41	-0.517437	0.698612	2.01841e-05	0.000134766	2621.41	-0.890129	0.539566	2.60909e-13	2.33314e-12
C21orf62-AS1	0	0	20.229	4.35685	7.49257	0	0.857687	1.73136	0	3.85194	-1.96702	0.25578	0.393092	0.562709	3.85194	-1.14362	0.452624	0.614901	0.712869
C21orf91	113.612	123.357	146.66	120.249	114.262	80.1313	168.964	104.747	233.854	133.982	-0.19105	0.875968	0.608222	0.742688	133.982	-0.424913	0.744884	0.255864	0.364459
C22orf15	61.7622	44.7857	97.3522	42.6971	25.2874	80.1313	49.7459	85.7023	57.3875	60.5391	-0.607454	0.656354	0.219807	0.37553	60.5391	-0.592673	0.663113	0.231533	0.33744
C22orf23	6.86246	14.1429	17.7004	6.97096	21.5411	0	16.2961	6.92544	0	10.0488	0.757092	1.69008	0.571887	0.715294	10.0488	1.25708	2.39011	0.345889	0.461139
C22orf29	340.836	432.143	221.255	348.548	406.472	143.986	320.775	542.781	278.329	337.236	0.653134	1.57258	0.00785011	0.0271265	337.236	1.10474	2.1506	6.42106e-06	2.78613e-05
C22orf34	0.762496	0	0	0	8.42914	0	0	0	0	1.02129	2.42266	5.36158	0.6137	0.746004	1.02129	5.85683	57.9539	0.201513	0.302416
C22orf39	1742.3	909.071	1915.44	1443.86	807.325	1600.12	1579	731.499	2279.72	1445.37	-0.281708	0.822617	0.0711916	0.16333	1445.37	-1.24255	0.422625	2.82569e-15	2.91338e-14
C22orf46	190.624	242	36.6651	265.768	224.777	165.271	254.733	195.644	96.124	185.734	1.25354	2.38425	0.00140363	0.00610492	185.734	1.1517	2.22176	0.00337017	0.00913656
C2CD2	219.599	410.928	158.039	290.166	224.777	140.23	279.606	309.913	107.601	237.873	0.957024	1.9413	0.000647748	0.00308224	237.873	1.21945	2.32858	1.33557e-05	5.53374e-05
C2CD2L	28.9748	9.42857	25.2863	23.527	56.1943	0	5.14612	52.8064	0	22.3737	1.18194	2.26881	0.323826	0.493451	22.3737	2.2183	4.65346	0.0626951	0.117495
C2CD3	134.199	107.643	65.7443	162.075	121.754	35.0575	109.784	237.196	40.1712	112.625	1.52449	2.87685	0.000185889	0.00100162	112.625	1.72482	3.30538	2.29791e-05	9.2191e-05
C2CD4C	227.224	297	104.938	266.639	358.707	122.701	268.456	225.942	68.8649	215.608	1.35777	2.56288	1.57161e-06	1.27128e-05	215.608	1.5675	2.96391	2.82907e-08	1.59986e-07
C2CD4D	9.91245	12.5714	6.32157	4.35685	5.61943	0	17.1537	12.9852	4.30406	8.13608	1.56984	2.96871	0.199268	0.349837	8.13608	1.56075	2.95007	0.202256	0.303228
C2CD5	162.412	157.929	147.925	204.772	90.8474	77.6272	166.391	190.449	57.3875	139.527	0.912023	1.88168	0.0182891	0.0550346	139.527	0.632608	1.55036	0.102644	0.176475
C2orf15	33.5498	12.5714	24.022	34.8548	14.0486	31.3013	24.8729	1.73136	139.165	35.1241	-1.05625	0.480881	0.16535	0.306213	35.1241	-2.77532	0.146065	0.000444669	0.00143694
C2orf16	0	1.57143	0	0	0	5.00821	5.14612	0.865679	0	1.39905	0.0288946	1.02023	0.992891	0.999113	1.39905	-1.03565	0.487797	0.753868	0.826987
C2orf40	93.787	101.357	144.132	82.7801	90.8474	136.474	67.7573	78.7768	88.9506	98.318	-0.598248	0.660556	0.0770021	0.173585	98.318	-0.449261	0.732418	0.183331	0.280872
C2orf42	37.3623	7.07143	32.8722	10.4564	21.5411	0	7.71919	12.9852	18.6509	16.5176	0.112314	1.08096	0.917732	0.95435	16.5176	-0.311039	0.806061	0.775959	0.844293
C2orf44	181.474	233.357	120.11	182.116	168.583	86.3916	142.376	246.719	233.854	177.22	0.204451	1.15225	0.55783	0.703868	177.22	0.563239	1.47758	0.105475	0.180361
C2orf47	335.498	195.643	852.148	264.025	198.553	747.475	248.729	197.375	474.881	390.481	-1.29037	0.408845	3.15344e-08	3.31151e-07	390.481	-1.81118	0.284957	1.40917e-14	1.38186e-13
C2orf48	8.38745	15.7143	26.5506	6.09959	0	0	8.57687	3.46272	14.3469	9.2376	-0.825367	0.564339	0.561492	0.706816	9.2376	-1.08271	0.47214	0.448284	0.562276
C2orf49	280.598	164.214	667.558	218.714	223.841	493.309	318.202	177.464	384.496	325.377	-0.919294	0.528768	0.00025329	0.0013215	325.377	-1.45245	0.365401	9.87349e-09	5.85749e-08
C2orf50	19.0624	3.92857	1.26431	7.84233	11.2389	1.25205	13.723	0	11.4775	7.75433	1.55687	2.94215	0.260981	0.42434	7.75433	0.126941	1.09198	0.928382	0.955995
C2orf68	250.861	230.214	342.629	195.187	144.232	174.035	222.999	186.987	185.075	214.691	-0.0693584	0.953062	0.820114	0.894146	214.691	-0.321467	0.800256	0.293481	0.405367
C2orf69	126.574	160.286	432.395	128.091	116.135	297.988	126.938	123.792	200.856	190.34	-1.28854	0.409364	1.87712e-05	0.000126048	190.34	-1.21844	0.429746	5.18063e-05	0.000195807
C2orf72	3.04998	18.0714	0	5.22822	0	26.2931	12.8653	23.3733	0	9.87571	-0.321573	0.800197	0.8459	0.912365	9.87571	0.652915	1.57234	0.69106	0.776262
C2orf74	304.236	87.2143	452.624	322.407	128.31	512.089	347.363	106.479	477.751	304.275	-0.566889	0.675071	0.00547741	0.0200347	304.275	-2.16711	0.222655	2.88624e-24	5.36925e-23
C2orf76	26.6874	4.71428	84.7091	28.7552	21.5411	91.3998	24.0152	7.79111	37.3018	36.3239	-1.42749	0.371777	0.0215997	0.0628908	36.3239	-2.66448	0.157729	3.73299e-05	0.000144683
C2orf78	0	0	8.8502	0	0	0	0	0	0	0.983356	-6.59805	0.0103226	0.151094	0.287886	0.983356	-6.54463	0.010712	0.154443	0.244732
C2orf80	6.86246	19.6429	22.7577	3.48548	0	12.5205	0.857687	7.79111	12.9122	9.64777	-2.09697	0.233749	0.0995785	0.211627	9.64777	-0.805966	0.571979	0.515088	0.625092
C2orf81	29.7373	67.5714	0	63.61	14.9851	47.578	30.8767	64.0603	2.86937	35.6987	1.29325	2.4508	0.193226	0.341642	35.6987	1.53409	2.89606	0.122415	0.203613
C2orf82	8.38745	11.7857	36.6651	7.84233	11.2389	23.789	15.4384	1.73136	22.955	15.537	-1.39953	0.379053	0.0977317	0.20851	15.537	-1.75239	0.29681	0.04055	0.0817211
C2orf88	6.09997	28.2857	18.9647	3.48548	5.61943	17.5287	8.57687	13.8509	0	11.3791	-1.01337	0.495387	0.381603	0.552418	11.3791	0.384458	1.30537	0.734379	0.812985
C2orf91	9.91245	4.71428	8.8502	10.4564	8.42914	7.51231	4.28844	0	8.60812	6.9746	-0.0169854	0.988296	0.989021	0.996561	6.9746	-0.931054	0.524475	0.460367	0.573845
C3	84.637	112.357	41.7224	96.722	124.564	65.1067	66.8996	117.732	22.955	81.4107	0.928682	1.90354	0.0249788	0.0709334	81.4107	1.44297	2.7188	0.000460755	0.00148484
C3orf14	138.012	48.7143	528.483	121.12	73.9892	488.3	114.93	71.8514	420.363	222.863	-1.94146	0.260353	1.32748e-15	3.35337e-14	222.863	-2.88986	0.134917	2.21044e-30	5.84417e-29
C3orf17	154.787	238.071	359.065	154.232	206.982	277.956	161.245	199.972	340.021	232.481	-1.05463	0.48142	1.56359e-06	1.26603e-05	232.481	-0.597922	0.660705	0.00598492	0.0153784
C3orf18	432.335	243.571	297.114	352.033	251.938	331.794	346.506	328.958	235.289	313.282	0.387082	1.30775	0.0838176	0.185766	313.282	-0.0695281	0.95295	0.757653	0.829992
C3orf33	68.6246	34.5714	177.004	76.6805	38.3994	41.3177	92.6302	34.6272	81.7771	71.7369	-0.335972	0.79225	0.490698	0.648224	71.7369	-1.48102	0.358235	0.00288588	0.00794414
C3orf35	0.762496	0	3.79294	0	0	17.5287	0.857687	0	0	2.5491	-3.71217	0.0762999	0.129817	0.258019	2.5491	-7.81418	0.00444322	0.0234072	0.0510858
C3orf38	105.224	67.5714	96.0879	95.8507	78.672	161.515	97.7764	117.732	295.545	123.997	-0.885617	0.541256	0.0266518	0.0746912	123.997	-1.06541	0.477837	0.00785819	0.0196335
C3orf52	118.187	91.9285	58.1585	58.3818	57.1309	52.5862	101.207	75.3141	22.955	70.6499	1.05058	2.07137	0.0234081	0.0672983	70.6499	0.742968	1.67362	0.110393	0.186983
C3orf58	182.999	294.643	120.11	202.158	289.401	179.043	249.587	253.644	344.325	235.101	-0.0170855	0.988227	0.958449	0.978866	235.101	0.383561	1.30456	0.240882	0.3484
C3orf62	44.2248	105.286	49.3083	63.61	84.2914	16.2767	44.5997	58.8662	5.73875	52.4668	1.0866	2.12373	0.0768822	0.173386	52.4668	1.7924	3.46391	0.00334369	0.00907974
C3orf67	54.1372	34.5714	35.4008	54.0249	15.9217	21.2849	69.4727	18.1793	27.259	36.6947	1.081	2.11551	0.0449002	0.113921	36.6947	-0.283767	0.821443	0.608433	0.707265
C3orf70	11.4374	32.2143	24.022	16.556	35.5897	12.5205	22.2999	14.7166	7.17343	19.6144	0.193781	1.14376	0.799587	0.881727	19.6144	0.910029	1.87908	0.228035	0.333307
C3orf80	12.1999	36.1428	1.26431	13.9419	14.9851	1.25205	7.71919	12.9852	0	11.1656	3.70583	13.0487	0.00712915	0.0249923	11.1656	4.62934	24.7498	0.000719786	0.00223802
C3P1	4.57498	6.28571	0	0.87137	1.87314	7.51231	5.14612	0	2.86937	3.237	0.0288114	1.02017	0.98789	0.996189	3.237	-0.341261	0.789351	0.858407	0.90473
C4orf19	53.3747	25.9286	102.409	20.0415	11.2389	50.0821	51.4612	6.92544	1.43469	35.8774	-0.303737	0.810151	0.732098	0.834848	35.8774	-1.8021	0.286756	0.0457748	0.0905312
C4orf27	870.008	426.643	916.628	616.93	412.091	866.42	776.207	412.063	760.384	673.042	-0.168396	0.889832	0.316188	0.485139	673.042	-1.02427	0.491659	1.68676e-09	1.07681e-08
C4orf29	16.7749	11	46.7796	22.6556	32.78	31.3013	24.0152	21.642	15.7815	24.7478	-0.570286	0.673483	0.401851	0.570381	24.7478	-0.52963	0.692732	0.436371	0.550527
C4orf3	934.057	555.5	1899	821.702	731.462	2077.15	800.222	659.648	1908.13	1154.1	-1.20271	0.434458	2.98568e-17	8.53904e-16	1154.1	-1.597	0.330563	7.25935e-29	1.77978e-27
C4orf32	50.3247	38.5	82.1804	40.083	29.9703	38.8136	40.3113	34.6272	32.9978	43.0898	-0.238263	0.847765	0.638623	0.765982	43.0898	-0.580299	0.668825	0.256535	0.365162
C4orf33	17.5374	9.42857	18.9647	14.8133	1.87314	33.8054	5.14612	16.4479	40.1712	17.5764	-1.30553	0.404571	0.128542	0.256339	17.5764	-1.73719	0.299954	0.0457582	0.090513
C4orf36	6.86246	1.57143	2.52863	2.61411	0.936572	0	3.43075	4.3284	5.73875	3.11234	0.661629	1.58187	0.698278	0.809987	3.11234	-0.257227	0.836694	0.882746	0.923106
C4orf46	133.437	91.9285	140.339	114.149	88.0377	63.8547	106.353	70.9857	131.991	104.564	0.0764142	1.05439	0.832094	0.902922	104.564	-0.419993	0.747428	0.247984	0.356104
C4orf47	19.8249	9.42857	2.52863	0.87137	0	20.0328	9.43456	8.65679	67.4303	15.3564	-1.57112	0.336546	0.211921	0.366153	15.3564	-2.30437	0.202449	0.0707086	0.129821
C4orf48	2025.95	1573	2905.39	1831.62	1772.93	3987.79	1646.76	1636.13	4153.42	2392.55	-1.00463	0.498398	1.34896e-11	2.16005e-10	2392.55	-1.14878	0.451007	1.11324e-14	1.09821e-13
C5	0.762496	10.2143	0	5.22822	0	0	1.71537	0.865679	2.86937	2.40616	1.45935	2.74984	0.546415	0.693616	2.40616	1.99505	3.9863	0.407066	0.522331
C5AR1	0.762496	3.14286	0	5.22822	0	0	0	4.3284	0	1.49577	5.36449	41.1975	0.162323	0.302071	1.49577	5.68955	51.609	0.137689	0.224011
C5orf15	215.786	108.429	150.453	228.299	134.866	180.296	198.983	113.404	189.379	168.877	0.307004	1.23714	0.215103	0.370223	168.877	-0.544712	0.685528	0.0308831	0.0647571
C5orf22	67.0996	92.7143	88.502	42.6971	50.5749	67.6108	58.3227	113.404	58.8221	71.0831	-0.354441	0.782173	0.410458	0.577992	71.0831	0.256247	1.19437	0.548239	0.654694
C5orf24	276.024	244.357	242.748	243.984	221.967	220.361	382.529	264.032	170.728	251.859	0.508063	1.42214	0.0416258	0.107429	251.859	0.20317	1.15123	0.417278	0.531907
C5orf28	9.91245	11	7.58589	13.0705	28.0971	1.25205	10.2922	4.3284	51.6487	15.243	-0.855089	0.552831	0.435823	0.601195	15.243	-0.473696	0.720117	0.664585	0.754616
C5orf30	166.987	140.643	307.228	155.104	126.437	126.457	111.499	135.912	266.852	170.791	-0.69078	0.619519	0.0377143	0.0992974	170.791	-0.796585	0.57571	0.0167952	0.0384301
C5orf34	36.5998	44.7857	96.0879	23.527	36.5263	110.181	42.0267	16.4479	41.6059	49.7542	-1.28058	0.41163	0.018862	0.0563871	49.7542	-1.34328	0.394123	0.0139976	0.0327068
C5orf38	9.14995	15.7143	7.58589	31.3693	13.112	43.8218	5.14612	14.7166	68.8649	23.2757	-1.39742	0.379608	0.10437	0.219026	23.2757	-1.46221	0.362937	0.0899635	0.158332
C5orf42	63.2872	34.5714	3.79294	30.4979	58.0674	176.539	53.1766	42.4183	8.60812	52.3288	-0.364176	0.776912	0.681996	0.798024	52.3288	-0.487349	0.713335	0.583837	0.686732
C5orf45	157.074	119.429	188.383	170.788	122.691	202.832	214.422	167.076	124.818	163.057	0.0689248	1.04893	0.81403	0.890371	163.057	-0.336984	0.791695	0.253399	0.361803
C5orf47	4.57498	3.92857	0	0.87137	0.936572	0	10.2922	0	0	2.2893	6.76132	108.483	0.0457024	0.115645	2.2893	5.07908	33.8031	0.137683	0.224011
C5orf49	38.1248	7.85714	25.2863	33.9834	18.7314	15.0246	18.8691	0	55.9528	23.7588	-0.0775074	0.947694	0.931646	0.962652	23.7588	-1.86013	0.275452	0.045542	0.0902227
C5orf51	157.074	135.143	132.753	225.685	85.228	291.728	157.814	85.7023	169.293	160.047	-0.136755	0.909563	0.693336	0.806362	160.047	-0.954896	0.515879	0.00645918	0.016471
C5orf56	21.3499	7.07143	24.022	17.4274	10.3023	48.83	18.0114	6.92544	27.259	20.1332	-0.818544	0.567014	0.217714	0.373066	20.1332	-2.04885	0.241677	0.00324848	0.00885043
C5orf58	17.5374	3.92857	21.4933	7.84233	3.74629	18.7808	6.8615	1.73136	15.7815	10.8559	-0.794235	0.576649	0.376175	0.547016	10.8559	-2.57489	0.167835	0.00799205	0.0199407
C5orf63	4.57498	1.57143	0	8.7137	10.3023	33.8054	10.2922	9.52247	2.86937	9.07243	-0.643584	0.640121	0.634566	0.762774	9.07243	-0.786697	0.57967	0.562385	0.667662
C5orf66	3.04998	7.07143	6.32157	2.61411	3.74629	6.26026	8.57687	2.59704	5.73875	5.10848	-0.366706	0.775551	0.770102	0.861519	5.10848	-0.444831	0.73467	0.723943	0.8043
C6orf1	344.648	112.357	366.651	282.324	172.329	197.824	324.206	85.7023	144.903	225.661	0.421824	1.33962	0.216687	0.371797	225.661	-0.940606	0.521014	0.00653671	0.016648
C6orf106	514.685	1605.21	533.541	519.336	1109.84	479.536	546.347	1358.25	245.331	768.009	0.32662	1.25407	0.169027	0.310717	768.009	1.69285	3.23296	7.5031e-13	6.44327e-12
C6orf118	8.38745	3.14286	20.229	6.97096	0	0	0	0	0	4.30337	-0.398939	0.758416	0.862912	0.922905	4.30337	-2.66594	0.157569	0.267785	0.377321
C6orf120	565.009	543.714	671.351	541.121	664.966	702.401	510.324	602.513	761.818	618.135	-0.401069	0.757297	0.00892923	0.0301708	618.135	-0.237928	0.847962	0.12025	0.200815
C6orf132	732.759	1063.86	455.153	985.519	1083.61	507.081	944.314	1450.88	616.915	871.121	0.75432	1.68684	5.75007e-05	0.000348031	871.121	1.18919	2.28024	2.07578e-10	1.44462e-09
C6orf136	115.899	66.7857	213.669	124.606	127.374	113.937	120.934	86.5679	160.685	125.606	-0.434129	0.740141	0.206063	0.358404	125.606	-0.801399	0.573793	0.0204338	0.0454408
C6orf141	41.1748	39.2857	49.3083	51.4108	33.7166	51.3341	30.0191	10.3882	111.906	46.5048	-0.791015	0.577937	0.170495	0.312876	46.5048	-1.34567	0.393471	0.0210997	0.0466817
C6orf163	10.6749	14.1429	25.2863	8.7137	2.80971	23.789	17.1537	6.05976	24.3897	14.78	-1.00814	0.497188	0.220293	0.375978	14.78	-1.6617	0.316067	0.0480302	0.0942273
C6orf201	7.62496	4.71428	10.1145	7.84233	5.61943	10.0164	7.71919	4.3284	11.4775	7.71745	-0.446129	0.734009	0.647142	0.771816	7.71745	-1.10894	0.463635	0.266947	0.376476
C6orf203	314.911	168.143	458.946	250.954	199.49	458.251	250.445	124.658	367.28	288.12	-0.653983	0.635523	0.00508792	0.0187982	288.12	-1.38524	0.382825	4.851e-09	2.97002e-08
C6orf223	16.0124	34.5714	7.58589	21.7842	6.556	13.7726	12.0076	0.865679	22.955	15.1234	0.172084	1.12668	0.868984	0.926627	15.1234	-0.0668951	0.95469	0.949056	0.970297
C6orf226	96.837	59.7143	168.154	78.4233	76.7989	182.8	87.4841	61.4632	130.556	104.692	-0.874448	0.545463	0.00498543	0.0184925	104.692	-1.28556	0.410211	4.58371e-05	0.000175178
C6orf25	3.04998	1.57143	0	0	0	17.5287	0	0	1.43469	2.62054	-2.62081	0.162576	0.319639	0.488973	2.62054	-3.5617	0.0846877	0.193125	0.292552
C6orf47	364.473	377.143	250.334	468.797	593.786	346.818	343.933	502.094	558.093	422.83	0.0286904	1.02009	0.917347	0.954214	422.83	0.351716	1.27608	0.202565	0.303552
C6orf48	767.833	348.071	1029.15	711.909	307.195	1083.03	662.992	269.226	1243.87	713.698	-0.646578	0.638794	4.30829e-05	0.000268778	713.698	-1.85872	0.275721	1.31194e-30	3.50241e-29
C6orf52	19.0624	16.5	68.273	15.6847	29.9703	45.0739	28.3037	21.642	51.6487	32.9065	-1.38873	0.3819	0.0117219	0.0377958	32.9065	-1.28098	0.411516	0.0198767	0.0443637
C6orf62	511.635	429.786	323.664	557.677	332.483	525.862	470.87	406.869	423.232	442.453	0.274979	1.20998	0.191013	0.338702	442.453	-0.121908	0.918972	0.563929	0.66901
C6orf89	260.774	445.5	118.846	331.992	441.125	301.745	401.398	513.348	182.205	332.992	0.720505	1.64776	0.0142225	0.0444966	332.992	1.21484	2.32116	3.40389e-05	0.00013271
C6orf99	16.7749	3.14286	40.4581	7.84233	20.6046	5.00821	3.43075	11.2538	21.5203	14.4484	-1.25059	0.420275	0.218094	0.373444	14.4484	-0.942653	0.520275	0.350909	0.466018
C7orf13	48.7997	30.6428	78.3875	15.6847	63.6869	38.8136	30.8767	70.9857	18.6509	44.0587	-0.511083	0.701695	0.420793	0.587181	44.0587	0.278172	1.21266	0.658384	0.750061
C7orf25	109.799	14.1429	270.563	80.166	29.9703	110.181	78.0496	35.4929	63.1262	87.9434	-0.728801	0.603405	0.151008	0.287822	87.9434	-2.48492	0.178634	2.03983e-06	9.41216e-06
C7orf26	215.024	271.071	202.29	192.573	300.639	418.185	214.422	183.524	295.545	254.808	-0.558511	0.679002	0.0527523	0.129314	254.808	-0.278961	0.824184	0.332151	0.44743
C7orf31	6.09997	12.5714	12.6431	8.7137	0.936572	52.5862	10.2922	17.3136	0	13.4619	-1.38263	0.383519	0.265192	0.428607	13.4619	-1.08193	0.472396	0.381597	0.497256
C7orf43	57.9497	66.7857	54.3655	80.166	85.228	40.0657	35.1652	54.5378	50.214	58.2753	0.260888	1.19822	0.566925	0.71098	58.2753	0.513618	1.42763	0.258156	0.366739
C7orf49	532.985	560.214	432.395	609.959	689.317	573.44	559.212	406.869	606.872	552.363	0.0782652	1.05575	0.713763	0.82123	552.363	0.0386924	1.02718	0.856207	0.90328
C7orf50	4699.26	4310.43	6367.09	4445.73	6573.8	6997.72	4411.09	4605.41	5902.3	5368.09	-0.507243	0.703566	0.000655283	0.00311449	5368.09	-0.315097	0.803797	0.0342296	0.0707434
C7orf55	375.91	194.071	786.403	362.49	258.494	887.705	410.832	213.823	833.553	480.365	-1.12577	0.458258	6.16729e-11	9.25376e-10	480.365	-1.91395	0.265364	1.1384e-27	2.60376e-26
C7orf60	23.6374	38.5	11.3788	40.9544	9.36572	1.25205	21.4422	51.0751	10.0428	23.072	1.92998	3.8105	0.0252323	0.0714671	23.072	2.13448	4.39079	0.0132027	0.0310871
C7orf61	1.52499	17.2857	2.52863	1.74274	0	0	0	0	0	2.56467	0.35839	1.28199	0.900085	0.944842	2.56467	2.76311	6.78857	0.320115	0.434491
C7orf73	1235.24	509.928	2383.23	1077.01	487.017	2271.22	1152.73	582.602	2727.34	1380.7	-1.09058	0.469574	2.36303e-16	6.39147e-15	1380.7	-2.22398	0.21405	1.11572e-60	1.02503e-58
C8B	0	0	0	0	0	15.0246	0	0	0	1.6694	-7.36126	0.0060819	0.0914204	0.198785	1.6694	-7.30784	0.00631135	0.0938051	0.163813
C8G	4.57498	0	7.58589	3.48548	8.42914	7.51231	5.14612	1.73136	11.4775	5.5492	-1.00621	0.497853	0.462962	0.623806	5.5492	-1.40357	0.377993	0.312023	0.42565
C8orf31	16.7749	23.5714	2.52863	12.1992	0	17.5287	3.43075	0.865679	0	8.54437	0.686362	1.60922	0.6716	0.789793	8.54437	0.285016	1.21842	0.860775	0.906529
C8orf33	1183.39	1030.86	1331.32	1221.66	1173.52	1662.73	1106.42	1021.5	1526.51	1250.88	-0.364387	0.776799	0.00667351	0.023647	1250.88	-0.487118	0.713449	0.000294665	0.000986918
C8orf34	6.86246	18.0714	20.229	4.35685	0.936572	0	7.71919	22.5077	0	8.9648	-0.101068	0.932343	0.947035	0.971431	8.9648	1.03268	2.04583	0.492759	0.604469
C8orf37	16.7749	36.9286	83.4447	8.7137	6.556	18.7808	18.0114	21.642	96.124	34.1085	-2.18569	0.219808	0.0032951	0.0129885	34.1085	-1.59926	0.330046	0.02967	0.0626265
C8orf37-AS1	1.52499	0	10.1145	0.87137	1.87314	0	0.857687	2.59704	7.17343	2.77913	-2.40186	0.189221	0.2289	0.386708	2.77913	-1.96057	0.256927	0.318367	0.432654
C8orf44	34.3123	15.7143	88.502	22.6556	25.2874	83.8875	32.5921	18.1793	30.1284	39.0288	-1.17902	0.441651	0.0341425	0.0914004	39.0288	-1.78162	0.290856	0.00165982	0.00480983
C8orf48	3.04998	11.7857	1.26431	15.6847	13.112	26.2931	6.00381	0	1.43469	8.73647	-0.236981	0.848519	0.871021	0.927957	8.73647	-0.225197	0.855478	0.877443	0.918845
C8orf58	438.435	440.786	367.915	399.959	512.305	519.602	467.44	345.406	502.14	443.776	-0.0892806	0.939991	0.669431	0.788144	443.776	-0.0978826	0.934403	0.639967	0.733835
C8orf59	1396.13	542.928	3877.65	1124.07	612.518	4472.33	1241.93	680.424	4989.84	2104.2	-1.82564	0.282116	5.24077e-38	7.83496e-36	2104.2	-2.86151	0.137594	1.65625e-88	3.58382e-86
C8orf76	189.099	139.071	260.449	160.332	125.501	211.597	126.08	133.315	279.764	180.579	-0.658865	0.633376	0.010661	0.0348497	180.579	-0.916577	0.529764	0.000416681	0.00135261
C8orf82	236.374	167.357	193.44	169.046	221.031	234.134	397.109	208.629	246.766	230.432	0.251412	1.19037	0.410374	0.577992	230.432	-0.175945	0.885187	0.566304	0.671295
C8orf88	86.9245	30.6428	262.977	75.8092	44.0189	200.328	90.9149	23.3733	304.153	124.349	-1.59604	0.330783	6.33317e-07	5.4902e-06	124.349	-2.97243	0.127412	1.42857e-18	1.88395e-17
C9orf114	1677.49	2284.86	1010.19	2133.11	2013.63	1066.75	2231.7	2372.83	1291.22	1786.86	0.843562	1.79447	1.97355e-08	2.14366e-07	1786.86	0.986806	1.98179	5.02682e-11	3.67369e-10
C9orf116	303.473	234.143	752.267	269.253	316.561	642.303	235.006	232.002	644.174	403.243	-1.3352	0.396338	2.62897e-11	4.0902e-10	403.243	-1.38279	0.383477	5.57438e-12	4.44141e-11
C9orf117	55.6622	51.8571	45.5153	52.2822	61.8137	30.0493	68.615	76.1798	40.1712	53.5718	0.609913	1.52617	0.159048	0.297739	53.5718	0.714076	1.64043	0.0988924	0.171134
C9orf129	37.3623	22.7857	32.8722	43.5685	28.0971	36.3095	26.5883	11.2538	12.9122	27.9722	0.383995	1.30495	0.54852	0.695215	27.9722	-0.408434	0.753441	0.529742	0.638119
C9orf135	243.999	138.286	691.58	236.141	155.471	817.59	236.722	107.344	572.44	355.508	-1.5385	0.344242	3.36521e-13	6.51069e-12	355.508	-2.37723	0.192479	4.00295e-28	9.39065e-27
C9orf142	2063.31	1340.43	2904.13	1703.53	1560.33	3481.96	1819.15	1546.97	3315.56	2192.82	-0.796123	0.575895	5.36023e-10	7.19583e-09	2192.82	-1.12543	0.458366	2.11398e-18	2.73951e-17
C9orf156	46.5122	55	44.251	49.6681	18.7314	126.457	46.3151	33.7615	38.7365	51.0481	-0.55829	0.679107	0.325599	0.495309	51.0481	-0.96055	0.513861	0.0930382	0.16275
C9orf16	1947.41	852.5	3053.32	1704.4	827.929	2943.57	1668.2	670.902	3543.68	1912.44	-0.842217	0.557786	7.20664e-10	9.50386e-09	1912.44	-2.02023	0.246518	2.45321e-48	1.40568e-46
C9orf163	4.57498	0	0	9.58507	0	3.75616	10.2922	3.46272	35.8672	7.50426	-0.691774	0.619092	0.663364	0.784257	7.50426	-3.51253	0.0876239	0.0416558	0.0835503
C9orf170	0	0	0	0	0	0	0	6.05976	10.0428	1.78917	-6.77182	0.00915124	0.112687	0.232456	1.78917	-0.722993	0.605839	0.831783	0.885363
C9orf171	2.28749	20.4286	10.1145	10.4564	2.80971	5.00821	1.71537	0.865679	0	5.96511	-0.0772492	0.947863	0.960876	0.980127	5.96511	0.669844	1.5909	0.667684	0.757245
C9orf172	4.57498	5.5	0	5.22822	6.556	0	1.71537	4.3284	0	3.10033	6.31191	79.4462	0.0399149	0.104009	3.10033	6.81875	112.888	0.0261237	0.0562014
C9orf173-AS1	1.52499	2.35714	0	1.74274	0	0	0	8.65679	0	1.58685	4.49574	22.5606	0.236328	0.395362	1.58685	6.24745	75.9748	0.0955416	0.166368
C9orf24	48.0372	9.42857	103.674	36.5975	22.4777	81.3834	28.3037	19.9106	107.601	50.8238	-1.37098	0.38663	0.00357789	0.013956	50.8238	-2.50559	0.176094	3.32941e-07	1.69197e-06
C9orf3	123.524	126.5	146.66	126.349	98.34	156.507	121.792	59.7319	173.597	125.889	-0.358669	0.779884	0.265591	0.429124	125.889	-0.742233	0.597813	0.02227	0.0488958
C9orf40	314.911	180.714	367.915	317.179	232.27	410.673	290.756	126.389	606.872	316.409	-0.584983	0.666657	0.024815	0.0705538	316.409	-1.3609	0.389339	2.39203e-07	1.23507e-06
C9orf41-AS1	1.52499	3.14286	2.52863	2.61411	1.87314	20.0328	3.43075	1.73136	10.0428	5.2135	-2.11301	0.231164	0.110648	0.229141	5.2135	-2.26696	0.207767	0.0901792	0.15866
C9orf43	2.28749	10.2143	21.4933	6.97096	0	0	5.14612	0.865679	0	5.21976	-0.58343	0.667375	0.761534	0.855893	5.21976	-0.9498	0.517704	0.623191	0.719929
C9orf47	0.762496	5.5	0	0.87137	8.42914	0	1.71537	11.2538	4.30406	3.64847	-0.321047	0.800489	0.865098	0.924032	3.64847	2.59346	6.03543	0.142366	0.229655
C9orf66	1.52499	0	1.26431	1.74274	0	28.7972	9.43456	2.59704	0	5.04009	-1.24886	0.420781	0.50609	0.660265	5.04009	-3.53879	0.0860438	0.0798748	0.143525
C9orf69	1477.72	1443.36	806.632	1232.99	1294.34	1055.48	1404.89	1484.64	903.852	1233.77	0.573355	1.48798	7.74688e-05	0.000453856	1233.77	0.610267	1.52654	2.59919e-05	0.000103245
C9orf72	37.3623	56.5714	35.4008	60.1245	22.4777	66.3588	53.1766	93.4934	35.8672	51.2036	0.127492	1.09239	0.820557	0.894417	51.2036	0.325868	1.25342	0.561395	0.666736
C9orf78	3695.82	1945.43	3197.45	3963.86	2254.33	3589.63	4387.93	1963.36	3720.14	3190.88	0.197414	1.14664	0.0963827	0.206516	3190.88	-0.769766	0.586513	1.12335e-10	7.97645e-10
C9orf85	204.349	135.143	417.224	198.672	88.0377	284.216	200.699	188.718	304.153	224.579	-0.736363	0.600251	0.0104348	0.0342896	224.579	-1.28666	0.409897	9.19728e-06	3.90522e-05
C9orf89	665.659	484	1163.17	656.141	511.368	1035.45	677.573	422.452	898.114	723.769	-0.631792	0.645374	4.29693e-05	0.000268171	723.769	-1.12789	0.457585	4.40614e-13	3.85625e-12
C9orf9	7.62496	8.64286	32.8722	15.6847	8.42914	25.041	5.14612	0.865679	17.2162	13.5025	-1.40455	0.377736	0.129917	0.258109	13.5025	-2.06717	0.238626	0.0292668	0.0618787
C9orf91	86.9245	173.643	136.546	82.7801	97.4034	40.0657	102.065	116.867	154.946	110.138	-0.284661	0.820935	0.520955	0.673264	110.138	0.230002	1.17284	0.602415	0.702454
CA10	2.28749	14.1429	0	3.48548	0	0	1.71537	0	10.0428	3.51933	-0.411114	0.752042	0.859825	0.920861	3.51933	0.513197	1.42721	0.823844	0.879463
CA11	682.434	568.857	943.178	872.241	609.708	898.974	590.089	549.706	898.114	734.811	-0.353811	0.782514	0.0347415	0.0927323	734.811	-0.665264	0.630574	7.69857e-05	0.000283609
CA12	147.162	210.571	131.489	216.1	191.061	101.416	180.114	172.27	84.6465	159.425	0.771598	1.70716	0.00723702	0.0253213	159.425	0.851807	1.80476	0.00301769	0.00826686
CA13	9.14995	4.71428	1.26431	8.7137	3.74629	0	1.71537	0	0	3.25599	3.92187	15.1566	0.0872083	0.191474	3.25599	2.71246	6.55436	0.242312	0.34976
CA14	887.545	605.786	790.196	1058.71	737.082	842.631	795.934	698.603	1121.92	837.602	-0.00583452	0.995964	0.973942	0.987453	837.602	-0.431891	0.741289	0.0160173	0.0368243
CA2	102.937	66.7857	241.484	80.166	54.3212	71.367	29.1614	22.5077	236.723	100.606	-1.37042	0.38678	0.0114717	0.0371217	100.606	-1.93438	0.261634	0.000396832	0.0012938
CA3	2.28749	0	30.3435	4.35685	0	0	7.71919	0	0	4.96745	-1.08352	0.471876	0.578179	0.719857	4.96745	-8.32252	0.00312372	0.0106339	0.0256565
CA3-AS1	6.86246	3.92857	3.79294	0	9.36572	7.51231	3.43075	0	0	3.87697	-0.137832	0.908884	0.944102	0.969805	3.87697	0.222164	1.16648	0.909646	0.94207
CA4	56.4247	73.8571	32.8722	49.6681	34.6531	2.5041	78.0496	49.3437	45.91	47.0314	1.18615	2.27545	0.0814654	0.181802	47.0314	0.965664	1.95296	0.156957	0.247751
CA5B	25.9249	28.2857	45.5153	27.0125	14.0486	42.5698	28.3037	12.9852	35.8672	28.9459	-0.610943	0.654769	0.282893	0.447785	28.9459	-1.1588	0.447885	0.045176	0.0895623
CA5BP1	250.861	168.143	182.061	265.768	313.751	192.816	288.183	188.718	143.469	221.53	0.633105	1.5509	0.0235944	0.0676684	221.53	0.368235	1.29077	0.189464	0.288493
CA7	72.4371	62.0714	59.4228	57.5104	53.3846	48.83	84.9111	77.0455	87.5159	67.0143	0.138095	1.10045	0.734252	0.836783	67.0143	-0.0200554	0.986195	0.96083	0.978853
CA8	33.5498	22.7857	24.022	26.1411	34.6531	65.1067	32.5921	32.0301	11.4775	31.3731	-0.129556	0.914113	0.843832	0.910904	31.3731	-0.176377	0.884923	0.788881	0.854114
CA9	12.1999	0.785714	22.7577	6.97096	2.80971	1.25205	23.1576	26.8361	48.7793	16.1721	-0.778771	0.582863	0.516416	0.669172	16.1721	-1.25567	0.418798	0.298481	0.41051
CAAP1	378.198	387.357	666.294	514.979	337.166	514.593	644.123	360.123	327.108	458.882	0.026095	1.01825	0.919417	0.955197	458.882	-0.476296	0.718821	0.0658794	0.122182
CAB39	175.374	208.214	145.396	116.764	190.124	182.8	195.553	197.375	130.556	171.351	0.0874093	1.06246	0.756447	0.852457	171.351	0.375762	1.29752	0.180974	0.278037
CAB39L	41.9373	54.2143	41.7224	23.527	17.7949	33.8054	34.3075	25.9704	18.6509	32.4367	0.0810833	1.05781	0.896461	0.942879	32.4367	0.0579719	1.041	0.925962	0.954383
CABIN1	1276.42	2461.64	421.017	1387.22	1937.77	691.133	1447.78	2456.8	621.219	1411.22	1.24631	2.37234	2.33206e-12	4.11489e-11	1411.22	1.98436	3.95687	4.35373e-29	1.08316e-27
CABLES1	195.961	421.928	36.6651	164.689	318.434	100.164	134.657	301.256	173.597	205.261	0.679095	1.60113	0.0881987	0.193313	205.261	1.75135	3.36674	9.79175e-06	4.14266e-05
CABLES2	128.862	117.071	146.66	144.647	85.228	38.8136	122.649	135.046	121.948	115.658	0.367181	1.28983	0.383053	0.553736	115.658	0.136128	1.09895	0.747058	0.821928
CABP1	70.1496	113.143	40.4581	45.3112	75.8623	46.3259	87.4841	62.3289	45.91	65.2192	0.61386	1.53035	0.159871	0.298758	65.2192	0.923512	1.89673	0.0338227	0.0700345
CABP7	6.86246	3.92857	2.52863	10.4564	14.0486	10.0164	5.14612	4.3284	8.60812	7.32486	0.0881042	1.06297	0.938131	0.966579	7.32486	0.0714882	1.0508	0.949858	0.970875
CABYR	57.1872	51.8571	115.053	77.5519	45.892	177.791	44.5997	97.8218	83.2118	83.4406	-1.07045	0.47617	0.0150241	0.0466172	83.4406	-0.944756	0.519518	0.0316488	0.0661411
CACFD1	572.634	629.357	429.867	558.548	639.678	444.479	491.455	564.423	337.151	518.621	0.420239	1.33815	0.0157147	0.048431	518.621	0.596213	1.51174	0.000599535	0.00189348
CACHD1	497.147	994.714	342.629	637.843	900.045	308.005	705.877	977.352	271.156	626.085	0.995973	1.99442	3.66803e-08	3.81536e-07	626.085	1.63853	3.11349	8.84569e-20	1.27491e-18
CACNA1A	240.186	249.071	120.11	379.917	156.407	177.791	312.198	424.183	126.252	242.902	1.1349	2.19603	0.000857048	0.00394043	242.902	0.967591	1.95557	0.00453325	0.0119816
CACNA1B	105.224	278.143	37.9294	149.876	207.919	70.1149	108.069	196.509	107.601	140.154	0.756732	1.68966	0.0407699	0.105819	140.154	1.66831	3.17842	5.46974e-06	2.38974e-05
CACNA1C	22.8749	39.2857	13.9075	34.8548	41.2091	41.3177	23.1576	22.5077	27.259	29.5971	-0.0299165	0.979477	0.961421	0.980292	29.5971	0.319884	1.24823	0.603131	0.70309
CACNA1C-AS1	4.57498	0.785714	1.26431	8.7137	9.36572	6.26026	4.28844	8.65679	2.86937	5.1977	0.752632	1.68486	0.589393	0.72871	5.1977	0.845715	1.79716	0.543937	0.650454
CACNA1C-AS2	49.5622	41.6428	64.48	38.3403	30.9069	78.8793	27.446	25.1047	41.6059	44.2187	-0.681875	0.623355	0.169399	0.31119	44.2187	-0.921952	0.527794	0.0649934	0.120697
CACNA1D	8.38745	16.5	13.9075	18.2988	29.9703	0	14.5807	19.9106	11.4775	14.7814	0.704355	1.62942	0.471387	0.630813	14.7814	1.39083	2.62229	0.151758	0.241476
CACNA1E	12.1999	35.3571	0	11.3278	9.36572	0	6.00381	54.5378	0	14.3102	7.67085	203.778	0.00603082	0.0217118	14.3102	9.41963	684.845	0.000722475	0.00224553
CACNA1F	15.2499	33	49.3083	27.8838	6.556	20.0328	36.8806	24.239	14.3469	25.2775	-0.0697726	0.952788	0.926999	0.959618	25.2775	-0.38976	0.763257	0.610749	0.709356
CACNA1G	163.937	311.143	44.251	153.361	151.725	96.408	169.822	297.794	77.4731	162.879	1.15961	2.23396	0.00112107	0.00500842	162.879	1.80359	3.49087	3.54966e-07	1.80056e-06
CACNA1G-AS1	3.04998	5.5	5.05726	0.87137	8.42914	1.25205	1.71537	0	0	2.87502	-0.168831	0.889563	0.933369	0.963499	2.87502	1.12865	2.18655	0.567727	0.672594
CACNA1H	748.008	821.071	295.85	914.067	693.063	251.663	779.638	1037.08	150.642	632.343	1.8031	3.48969	9.25619e-15	2.10828e-13	632.343	1.8667	3.64698	1.03409e-15	1.09643e-14
CACNA1I	58.7122	62.0714	18.9647	72.3237	73.9892	10.0164	79.7649	51.0751	10.0428	48.5512	2.42713	5.37822	1.99321e-06	1.58349e-05	48.5512	2.25539	4.77463	1.05315e-05	4.43737e-05
CACNA1S	2.28749	0.785714	0	0	4.68286	46.3259	0	0	0	6.00911	-4.31218	0.050339	0.0591745	0.141628	6.00911	-3.09578	0.11697	0.158247	0.249377
CACNA2D1	102.937	184.643	92.2949	196.93	218.221	120.197	138.945	195.644	32.9978	142.534	0.83189	1.78002	0.0395094	0.103148	142.534	1.28035	2.42898	0.00148343	0.00434925
CACNA2D2	325.586	565.714	139.075	376.432	630.313	184.052	409.975	708.126	86.0812	380.595	1.43707	2.70771	8.92473e-09	1.01851e-07	380.595	2.21329	4.63733	5.61112e-19	7.62602e-18
CACNA2D3	40.4123	11.7857	59.4228	35.7262	35.5897	52.5862	42.8844	36.3585	74.6037	43.2633	-0.647214	0.638512	0.215587	0.370695	43.2633	-1.16029	0.447422	0.0283675	0.0602562
CACNA2D4	2.28749	2.35714	0	4.35685	0	0	5.14612	6.92544	0	2.34145	6.34303	81.1788	0.0567499	0.137001	2.34145	6.00218	64.0966	0.072004	0.131904
CACNB1	69.3871	40.0714	31.6079	60.1245	52.448	12.5205	87.4841	36.3585	27.259	46.3623	1.60687	3.0459	0.00141934	0.00616351	46.3623	0.853891	1.80737	0.0937547	0.163788
CACNB2	9.91245	28.2857	12.6431	8.7137	3.74629	2.5041	11.1499	14.7166	47.3446	15.4463	-1.06242	0.478828	0.301979	0.469247	15.4463	-0.406841	0.754273	0.689888	0.775529
CACNB3	168.512	196.429	141.603	208.257	209.792	160.263	152.668	141.106	60.2568	159.876	0.543941	1.45795	0.121894	0.245987	159.876	0.591962	1.50729	0.0923107	0.161618
CACNB4	3.04998	16.5	5.05726	6.97096	14.9851	0	16.2961	10.3882	1.43469	8.29803	2.0092	4.0256	0.11955	0.242506	8.29803	2.68307	6.42219	0.0363288	0.0742514
CACNG4	18.2999	24.3571	1.26431	19.1701	20.6046	7.51231	12.8653	19.9106	5.73875	14.4137	1.79799	3.47735	0.0413676	0.106939	14.4137	2.16428	4.48241	0.0136638	0.0320499
CACNG5	6.86246	11	2.52863	6.09959	2.80971	2.5041	6.00381	4.3284	0	4.68186	1.88929	3.70454	0.204662	0.356722	4.68186	1.83075	3.55723	0.219813	0.323706
CACNG6	7.62496	0.785714	0	5.22822	0.936572	1.25205	0.857687	0	12.9122	3.2886	-0.032307	0.977855	0.986289	0.995246	3.2886	-3.03061	0.122376	0.150851	0.240265
CACNG7	136.487	35.3571	50.5726	127.22	67.4332	60.0985	143.234	52.8064	37.3018	78.9456	1.45594	2.74336	0.000170468	0.000923976	78.9456	0.064867	1.04599	0.870091	0.912832
CACNG8	128.099	204.286	107.467	175.145	182.631	91.3998	190.407	186.987	114.775	153.466	0.654531	1.5741	0.0183251	0.0551128	153.466	0.873522	1.83213	0.00159957	0.00465409
CACTIN	902.795	979	335.043	967.22	1084.55	294.232	873.126	947.919	494.967	764.317	1.28955	2.44452	8.27721e-12	1.36392e-10	764.317	1.42408	2.68344	4.34678e-14	4.10113e-13
CACTIN-AS1	2.28749	3.14286	0	6.97096	1.87314	0	4.28844	3.46272	8.60812	3.40375	0.675771	1.59745	0.707661	0.816763	3.40375	0.00477551	1.00332	0.997912	1
CACUL1	591.697	745.643	592.963	660.498	708.985	379.372	694.727	808.545	638.435	646.763	0.274336	1.20944	0.162244	0.301991	646.763	0.491802	1.4062	0.0121245	0.0288091
CACYBP	2436.94	1569.07	5746.31	2359.67	1949.94	6072.45	2312.33	1786.76	5632.58	3318.45	-1.29563	0.407359	9.4519e-32	8.83162e-30	3318.45	-1.71825	0.303917	4.06969e-54	2.94828e-52
CAD	1197.88	3317.28	890.077	1318.38	2360.16	653.571	1107.27	3057.58	721.647	1624.87	0.67747	1.59933	3.72666e-05	0.000235893	1624.87	1.94714	3.85611	1.01918e-32	2.95077e-31
CADM1	262.299	249.071	180.797	372.075	351.214	209.093	355.083	185.255	202.291	263.02	0.740134	1.67033	0.00593839	0.0214301	263.02	0.406794	1.32574	0.131938	0.216583
CADM2	42.6998	82.5	69.5373	51.4108	73.9892	127.709	43.7421	60.5976	100.428	72.5127	-1.11147	0.462822	0.00421273	0.0160738	72.5127	-0.454918	0.729552	0.234725	0.341296
CADM3	39.6498	45.5714	40.4581	35.7262	46.8286	31.3013	36.0229	94.3591	31.5631	44.6089	0.108147	1.07784	0.829112	0.900578	44.6089	0.852872	1.80609	0.0849767	0.151058
CADM4	414.035	273.429	286.999	381.66	372.755	403.161	463.151	323.764	385.931	367.209	0.226763	1.17021	0.281972	0.446839	367.209	-0.150442	0.900975	0.477724	0.590912
CADPS	21.3499	23.5714	21.4933	40.083	69.3063	42.5698	24.8729	16.4479	61.6915	35.7096	-0.541809	0.686909	0.41769	0.584439	35.7096	-0.202999	0.868743	0.760466	0.831949
CADPS2	77.0121	108.429	93.5593	164.689	103.959	122.701	96.9187	108.21	54.5181	103.333	0.317889	1.24651	0.423117	0.589624	103.333	0.240535	1.18143	0.545067	0.651332
CAGE1	5.33747	0	7.58589	0	4.68286	0	3.43075	2.59704	0	2.626	0.205809	1.15333	0.932058	0.962932	2.626	-0.0732754	0.950478	0.97589	0.988182
CAHM	14.4874	22	58.1585	13.0705	14.0486	33.8054	11.1499	37.2242	28.6937	25.8487	-1.64079	0.320681	0.0117237	0.0377958	25.8487	-0.720023	0.607088	0.257119	0.365835
CALB1	50.3247	56.5714	150.453	59.2531	28.0971	191.564	41.169	54.5378	64.5609	77.3924	-1.43374	0.370169	0.00197075	0.00824238	77.3924	-1.54558	0.342558	0.000883668	0.00269809
CALB2	61.7622	79.3571	106.202	50.5394	75.8623	35.0575	71.1881	45.0153	86.0812	67.8962	-0.307823	0.80786	0.512221	0.665572	67.8962	-0.181735	0.881642	0.698511	0.782388
CALCA	21.3499	6.28571	21.4933	14.8133	27.1606	30.0493	12.8653	14.7166	21.5203	18.9171	-0.574379	0.671575	0.441879	0.606525	18.9171	-0.609625	0.655367	0.41532	0.529966
CALCB	123.524	84.0714	156.775	143.776	184.505	219.109	93.4879	87.4336	331.413	158.233	-0.96977	0.510588	0.0102271	0.0337312	158.233	-0.99145	0.502972	0.00871393	0.0215166
CALCOCO1	48.0372	99.7857	139.075	40.9544	66.4966	13.7726	44.5997	59.7319	2.86937	57.258	-0.223822	0.856294	0.782888	0.869611	57.258	0.535039	1.44898	0.508472	0.619302
CALCOCO2	123.524	161.071	121.374	100.208	158.281	85.1396	125.222	109.076	142.034	125.103	0.00436279	1.00303	0.989136	0.996561	125.103	0.300055	1.23119	0.347234	0.462407
CALCR	7.62496	1.57143	0	2.61411	1.87314	0	2.57306	2.59704	1.43469	2.25427	3.23578	9.42032	0.155399	0.293201	2.25427	2.14634	4.42702	0.353438	0.468582
CALCRL	0.762496	0	0	2.61411	0	0	1.71537	10.3882	0	1.72001	5.13031	35.025	0.176169	0.319909	1.72001	6.16176	71.5936	0.102236	0.175829
CALD1	5546.4	6778.36	5210.24	6846.35	6555.06	6354.17	8545.14	8077.65	6567.99	6720.15	0.207534	1.15471	0.182812	0.327846	6720.15	0.239858	1.18088	0.123659	0.205234
CALHM1	16.0124	8.64286	21.4933	15.6847	0	67.6108	2.57306	19.0449	27.259	19.8135	-1.7628	0.294675	0.0847232	0.187348	19.8135	-2.06807	0.238479	0.0445592	0.0885403
CALHM2	22.8749	37.7143	7.58589	16.556	13.112	10.0164	16.2961	31.1645	7.17343	18.0548	1.16814	2.24722	0.131665	0.260558	18.0548	1.72686	3.31006	0.024719	0.0535931
CALHM3	5.33747	19.6429	0	11.3278	14.0486	0	1.71537	0	0	5.78579	6.98426	126.611	0.0232759	0.0669885	5.78579	7.86044	232.395	0.0104967	0.0253739
CALM1	11913.2	10987.4	17432.4	11395.8	12018.1	18401.4	12301.8	12388.7	18673.9	13945.9	-0.614117	0.65333	1.86929e-11	2.93886e-10	13945.9	-0.62297	0.649333	9.6382e-12	7.50475e-11
CALM2	7021.06	2741.36	9708.67	6409.8	2890.26	8291.09	7376.97	3294.78	8628.2	6262.46	-0.355822	0.781424	0.00176897	0.00750148	6262.46	-1.57689	0.335204	2.81059e-43	1.32058e-41
CALM3	4542.19	3670.86	4994.04	3657.14	3454.08	4943.1	4190.66	3504.27	4988.4	4216.08	-0.268447	0.830213	0.0123589	0.0394798	4216.08	-0.489668	0.712189	5.17589e-06	2.26919e-05
CALML4	346.173	401.5	283.206	414.772	380.248	313.013	385.102	354.929	205.16	342.678	0.513441	1.42745	0.0143531	0.0448227	342.678	0.502207	1.41638	0.0167193	0.0382671
CALML5	2.28749	0	0	0	0	0	2.57306	19.0449	0	2.65617	5.06918	33.5719	0.175553	0.319157	2.65617	7.03633	131.264	0.0577022	0.109719
CALML6	0	0.785714	3.79294	0.87137	5.61943	0	0	0.865679	0	1.32613	-2.15652	0.224297	0.498871	0.654712	1.32613	0.924431	1.89794	0.749762	0.82391
CALN1	295.848	401.5	341.365	382.531	268.796	299.24	276.175	324.63	282.633	319.191	0.0471827	1.03325	0.8359	0.905529	319.191	0.108535	1.07813	0.633698	0.72853
CALR	5667.63	5851.21	4442.8	5916.6	6819.18	4617.57	5872.59	6828.48	4288.28	5589.37	0.38697	1.30764	0.000125939	0.000702619	5589.37	0.546483	1.46052	6.07279e-08	3.33557e-07
CALR3	7.62496	8.64286	0	0.87137	11.2389	68.8629	0	19.0449	4.30406	13.3989	-3.09139	0.117328	0.0354598	0.0942519	13.3989	-0.913096	0.531044	0.519121	0.628687
CALU	2061.79	1738	1907.85	2252.49	1908.73	1876.83	2406.67	1965.09	2137.68	2028.35	0.182675	1.13499	0.124411	0.249627	2028.35	-0.0775369	0.947674	0.515216	0.625156
CALY	51.8497	15.7143	30.3435	37.4689	39.336	37.5616	23.1576	25.9704	55.9528	35.2616	-0.134224	0.91116	0.817441	0.892559	35.2616	-0.614179	0.653301	0.29571	0.40755
CAMK1	282.123	192.5	558.827	293.652	303.449	209.093	285.61	201.703	335.717	295.853	-0.35776	0.780376	0.251167	0.412796	295.853	-0.662899	0.631608	0.0340001	0.0703398
CAMK1D	211.211	404.643	128.96	171.66	188.251	65.1067	165.534	316.839	87.5159	193.302	0.961765	1.94769	0.0044785	0.0169036	193.302	1.69255	3.23228	4.95644e-07	2.46622e-06
CAMK1G	3.81248	13.3571	0	9.58507	15.9217	0	12.8653	12.9852	7.17343	8.41115	1.91738	3.77735	0.152204	0.289297	8.41115	2.60622	6.08908	0.0501094	0.097486
CAMK2A	0	3.14286	0	0	0	0	0.857687	6.05976	0	1.11781	2.55053	5.85851	0.566731	0.7109	1.11781	5.98859	63.496	0.157922	0.248948
CAMK2B	3.81248	0	12.6431	12.1992	5.61943	0	10.2922	9.52247	2.86937	6.3287	0.756659	1.68957	0.625825	0.755742	6.3287	-0.0429959	0.970637	0.978135	0.989568
CAMK2D	25.9249	35.3571	16.4361	20.0415	29.9703	12.5205	22.2999	53.6721	21.5203	26.4159	0.441716	1.35822	0.472289	0.631652	26.4159	1.2426	2.36625	0.0403782	0.0814448
CAMK2G	227.224	297.786	151.718	215.228	175.139	107.676	222.999	248.45	149.207	199.492	0.704916	1.63005	0.0100075	0.0331201	199.492	0.822721	1.76874	0.00262773	0.00729434
CAMK2N1	28.2123	43.2143	13.9075	6.09959	14.0486	12.5205	26.5883	46.7467	43.0406	26.042	-0.180689	0.882281	0.820793	0.894496	26.042	0.591022	1.50631	0.454765	0.568068
CAMK2N2	44.9873	63.6428	10.1145	37.4689	77.7354	52.5862	27.446	41.5526	17.2162	41.4167	0.456317	1.37204	0.465567	0.62592	41.4167	1.18987	2.28132	0.0552048	0.105788
CAMK4	17.5374	7.85714	37.9294	24.3984	12.1754	31.3013	6.8615	5.19408	21.5203	18.3083	-0.896991	0.537006	0.234325	0.393052	18.3083	-1.85339	0.276741	0.0171591	0.0391473
CAMKK1	77.7746	179.143	58.1585	82.7801	59.9406	25.041	72.0457	164.479	97.5587	90.769	0.368554	1.29106	0.463767	0.624215	90.769	1.16488	2.24214	0.0198342	0.0442749
CAMKK2	1280.99	1650	579.056	1196.39	1602.47	443.227	1346.57	1072.58	714.474	1098.42	1.13991	2.20367	8.5439e-09	9.78444e-08	1098.42	1.31759	2.49249	2.77755e-11	2.06589e-10
CAMKMT	141.062	92.7143	106.202	133.32	123.627	50.0821	180.972	90.0307	146.338	118.261	0.592927	1.5083	0.120972	0.244788	118.261	0.0203835	1.01423	0.957782	0.976668
CAMKV	1002.68	1037.14	1051.91	997.718	1030.23	636.043	920.299	1406.73	605.438	965.354	0.348213	1.27298	0.0947127	0.204028	965.354	0.598491	1.51413	0.00404546	0.0107999
CAMLG	485.71	234.143	811.69	481.867	303.449	873.933	483.736	373.974	856.508	545.001	-0.808628	0.570925	1.10226e-05	7.76301e-05	545.001	-1.48073	0.358308	1.73749e-15	1.82109e-14
CAMSAP1	462.835	777.071	321.136	399.087	560.07	264.183	421.125	734.096	200.856	460.051	0.704864	1.62999	0.000985909	0.00446401	460.051	1.396	2.63171	5.40342e-11	3.93357e-10
CAMSAP2	128.099	228.643	122.638	110.664	189.187	171.531	146.665	256.241	88.9506	160.291	0.00573455	1.00398	0.985013	0.994264	160.291	0.812512	1.75627	0.00719139	0.018144
CAMSAP3	571.109	968.785	261.713	616.058	695.873	374.364	578.939	876.933	371.584	590.595	0.810293	1.75357	2.78667e-05	0.000181205	590.595	1.3361	2.52469	4.07183e-12	3.28886e-11
CAMTA1	1908.53	799.857	3706.97	1685.23	880.377	3946.47	1644.19	921.949	3753.14	2138.52	-1.12256	0.459278	1.21196e-22	5.55171e-21	2138.52	-2.13251	0.22806	3.11611e-75	4.5754e-73
CAMTA2	78.5371	40.8571	29.0792	84.5229	74.9257	71.367	55.7497	53.6721	76.0384	62.7499	0.312671	1.24201	0.507195	0.661095	62.7499	-0.0587582	0.96009	0.901411	0.936608
CAND1	423.185	862.714	331.25	461.826	616.264	528.366	374.809	660.513	324.239	509.241	0.0885789	1.06332	0.694039	0.806818	509.241	0.853156	1.80645	0.000139554	0.000492951
CAND1.11	0	0	0	5.22822	0	0	0	0.865679	0	0.6771	5.16814	35.9556	0.26104	0.42434	0.6771	2.5755	5.96077	0.590333	0.691948
CAND2	80.0621	128.857	75.8589	69.7096	96.4669	60.0985	66.8996	136.777	152.077	96.3119	-0.405546	0.754951	0.306892	0.475218	96.3119	0.335419	1.26174	0.393497	0.508811
CANT1	315.673	647.428	161.832	412.158	559.133	235.386	355.94	542.781	218.072	383.156	0.816708	1.76138	0.000109685	0.000621134	383.156	1.50841	2.84497	6.46874e-13	5.58124e-12
CANX	1256.59	2866.29	1706.82	1555.39	2790.98	2244.93	1446.06	3126.83	2152.03	2127.33	-0.519666	0.697533	0.000182329	0.000983729	2127.33	0.525356	1.43929	0.000142822	0.000503473
CAP1	1326.74	1714.43	1405.92	1131.91	1571.57	1242.04	1060.96	1585.92	1395.95	1381.71	-0.19971	0.870725	0.131154	0.259834	1381.71	0.269101	1.20506	0.0412281	0.0828137
CAP2	42.6998	59.7143	118.846	70.5809	77.7354	50.0821	49.7459	28.5674	51.6487	61.0689	-0.438889	0.737702	0.394595	0.563928	61.0689	-0.412531	0.751304	0.423786	0.538531
CAPG	1445.69	1529	1800.38	1090.95	1752.33	1368.49	1061.82	1158.28	1622.63	1425.51	-0.41269	0.751222	0.0229957	0.066333	1425.51	-0.110135	0.926502	0.543565	0.650104
CAPN1	1534.9	1767.07	1428.68	1440.37	2116.65	1095.55	1128.72	1662.1	883.767	1450.87	0.267631	1.20383	0.146873	0.281934	1450.87	0.701698	1.62642	0.000139567	0.000492951
CAPN10	1024.79	751.143	380.559	955.893	690.253	678.612	831.957	668.305	588.221	729.971	0.772172	1.70784	0.00011131	0.000629251	729.971	0.357289	1.28102	0.0746077	0.135692
CAPN10-AS1	19.8249	22	21.4933	24.3984	44.9554	61.3506	7.71919	35.4929	34.4325	30.1852	-1.17529	0.442795	0.0766754	0.173014	30.1852	-0.198474	0.871472	0.760803	0.832152
CAPN11	16.0124	4.71428	0	4.35685	0.936572	33.8054	2.57306	6.92544	1.43469	7.86208	-0.619269	0.651001	0.679465	0.796479	7.86208	-1.48654	0.356867	0.328393	0.443141
CAPN12	189.861	106.071	194.704	153.361	87.1012	209.093	196.41	46.7467	130.556	145.99	0.0128949	1.00898	0.969544	0.985155	145.99	-1.15539	0.448946	0.000783153	0.00241541
CAPN13	12.1999	24.3571	56.8941	6.09959	17.7949	7.51231	16.2961	26.8361	51.6487	24.4043	-1.74308	0.298731	0.0254874	0.07198	24.4043	-0.747389	0.595681	0.328455	0.443141
CAPN15	1036.99	1424.5	505.726	1323.61	1530.36	480.788	1405.75	1523.6	507.879	1082.13	1.33338	2.51992	3.69156e-19	1.28075e-17	1082.13	1.58354	2.99704	1.9812e-26	4.16634e-25
CAPN2	558.147	497.357	314.814	469.668	664.966	537.13	451.144	380.899	380.192	472.702	0.263288	1.20021	0.283315	0.448144	472.702	0.323836	1.25165	0.186938	0.285468
CAPN5	377.435	263.214	252.863	357.262	339.039	244.15	292.471	363.585	126.252	290.697	0.718144	1.64506	0.00835118	0.0285817	290.697	0.628544	1.546	0.021127	0.0467169
CAPN6	26.6874	54.2143	112.524	13.0705	15.9217	10.0164	27.446	23.3733	68.8649	39.1243	-1.50833	0.351518	0.044988	0.114101	39.1243	-1.02945	0.489898	0.168745	0.262984
CAPN7	80.8246	93.5	84.7091	74.9378	117.071	91.3998	126.938	109.076	32.9978	90.1615	0.429776	1.34702	0.307338	0.475613	90.1615	0.606812	1.52289	0.148921	0.237768
CAPNS1	961.507	1006.5	1078.46	840.872	920.65	1265.82	743.615	859.62	1084.62	973.519	-0.429328	0.742608	0.00424547	0.01618	973.519	-0.299177	0.812716	0.0461468	0.0911469
CAPRIN1	782.321	1518.79	855.941	870.498	1182.89	1354.72	912.579	1604.1	962.675	1116.06	-0.30735	0.808125	0.0973416	0.207934	1116.06	0.440168	1.35676	0.017161	0.0391473
CAPRIN2	189.861	241.214	391.937	240.498	236.953	505.829	270.172	245.853	441.883	307.133	-0.936613	0.522458	9.21036e-06	6.58255e-05	307.133	-0.887795	0.54044	2.63042e-05	0.00010441
CAPS	22.8749	14.1429	56.8941	33.9834	32.78	5.00821	23.1576	32.8958	55.9528	30.8544	-0.556956	0.679735	0.460679	0.621992	30.8544	-0.562134	0.6773	0.456881	0.570321
CAPS2	4.57498	2.35714	0	2.61411	3.74629	7.51231	5.14612	1.73136	22.955	5.62637	-1.29596	0.407266	0.361799	0.532801	5.62637	-1.95636	0.257678	0.177958	0.274172
CAPZA1	405.648	357.5	375.501	364.233	228.523	395.649	372.236	260.57	265.417	336.142	0.138693	1.10091	0.551943	0.69799	336.142	-0.291989	0.816775	0.212977	0.315901
CAPZA2	356.848	118.643	675.144	393.859	177.012	527.114	387.675	215.554	344.325	355.13	-0.443264	0.735469	0.0988877	0.210376	355.13	-1.59952	0.329987	4.24619e-09	2.61139e-08
CAPZB	5214.71	4329.28	6150.89	4769.01	5301	5097.1	4324.46	3704.24	5256.69	4905.26	-0.206014	0.866929	0.147535	0.283006	4905.26	-0.307866	0.807836	0.0304966	0.0640917
CARD10	240.186	263.214	116.317	241.369	403.662	170.279	289.898	332.421	100.428	239.753	0.992217	1.98924	0.000247431	0.00129298	239.753	1.36481	2.57543	4.27113e-07	2.14077e-06
CARD11	871.533	926.357	231.37	971.577	1110.77	474.528	1035.23	997.263	599.699	802.036	1.14195	2.20679	4.62021e-06	3.45675e-05	802.036	1.21807	2.32636	1.0234e-06	4.91963e-06
CARD14	6.09997	3.92857	5.05726	5.22822	15.9217	6.26026	4.28844	3.46272	1.43469	5.74243	0.283298	1.21697	0.825551	0.897955	5.74243	0.853375	1.80672	0.502401	0.613407
CARD8	61.7622	68.3571	94.8236	78.4233	29.9703	80.1313	64.3266	85.7023	117.644	75.6823	-0.515959	0.699328	0.230577	0.388514	75.6823	-0.664999	0.630689	0.123593	0.205198
CARD8-AS1	2.28749	0	0	4.35685	0	0	6.8615	0	0	1.50065	6.5396	93.0284	0.0782233	0.175927	1.50065	0	1	1	1
CARD9	8.38745	12.5714	15.1718	10.4564	20.6046	11.2685	10.2922	2.59704	2.86937	10.4688	-0.0168561	0.988384	0.987071	0.99573	10.4688	0.277585	1.21216	0.788714	0.853991
CARF	3.04998	3.14286	1.26431	0	0	3.75616	19.7268	11.2538	4.30406	5.16645	1.29114	2.44722	0.466674	0.626806	5.16645	0.632583	1.55034	0.723408	0.803923
CARHSP1	6236.45	5107.14	11851.7	5731	6004.36	12041	5716.49	5855.46	11906.5	7827.78	-1.01742	0.493999	9.26419e-25	5.12962e-23	7827.78	-1.07734	0.4739	1.52879e-27	3.44868e-26
CARKD	337.786	341	352.744	291.909	259.43	254.167	219.568	267.495	262.548	287.405	-0.0337269	0.976893	0.890246	0.939108	287.405	-0.00224091	0.998448	0.992687	0.999433
CARM1	623.722	856.428	360.33	684.897	755.813	421.942	645.839	893.381	426.102	629.828	0.694079	1.61785	9.00774e-06	6.45176e-05	629.828	1.053	2.07484	1.39079e-11	1.06428e-10
CARNMT1	79.2996	69.1428	99.8808	128.091	120.818	58.8465	126.08	90.0307	84.6465	95.204	0.453697	1.36955	0.233092	0.391622	95.204	0.200683	1.14924	0.599433	0.69992
CARNS1	4.57498	4.71428	3.79294	4.35685	16.8583	0	5.14612	12.9852	0	5.82541	1.86549	3.64392	0.228134	0.385655	5.82541	3.15839	8.92831	0.0383378	0.0778255
CARS	1569.22	2381.5	1060.76	1503.11	2250.58	1161.9	1358.58	2202.29	982.76	1607.86	0.466674	1.38192	0.000145285	0.000799065	1607.86	1.0918	2.13139	4.43348e-19	6.07066e-18
[truncated: 14,447 more rows]
